# Supplementary material for: Transcriptome of Protoplasts Reprogrammed into Stem Cells in Physcomitrella patens
Source: PLoS One. 2012 Apr 24;7(4):e35961. doi: 10.1371/journal.pone.0035961 (PMC3335808; doi:10.1371/journal.pone.0035961)
Supplement: Table S1 — List of differentially expressed genes during protoplast reprogramming into stem cells. (XLS) [file pone.0035961.s006.xls]

## Sheet: m
gene ID	0h.sam	24h.sam	logFC		24h.sam	48h.sam	logFC		48h.sam	72h.sam	logFC		0h (TPM)	24h (TPM)	48h (TPM)	72h (TPM)	PFAM	Panther	KOG	KEGG ec	KEGG Orthology	best arabidopsis TAIR10 hit name	best arabidopsis TAIR10 hit symbol	best arabidopsis TAIR10 hit defline	Pathway	GO terms
Pp1s350_28V6	86	399	2.45464		399	0	-37.6438		0	346	37.4271		2.59474	14.546	0	10.2578	PF00011	PTHR11527	KOG3591		K13993	AT1G53540.1		HSP20-like chaperones superfamily protein	Protein processing in endoplasmic reticulum	GO:0009408 response to heat
Pp1s15_49V6	1921	104	-3.96655		104	0	-35.704		0	219	36.7672		57.9592	3.79143	0	6.49263	PF04783,PF04782	PTHR21450				AT3G51290.2		Protein of unknown function (DUF630) ;Protein of unknown function (DUF632)		GO:0005525 GTP binding;GO:0005622 intracellular;GO:0007264 small GTPase mediated signal transduction;GO:0015031 protein transport
Pp1s268_6V6	21	148	3.05779		148	0	-36.213		0	132	36.0368		0.633599	5.39549	0	3.91337	PF00690,PF00122,PF00702,PF00689	PTHR11939	KOG0202	3.6.3.8	K01537	AT1G10130.1	ECA3	endoplasmic reticulum-type calcium-transporting ATPase 3		GO:0005388 calcium-transporting ATPase activity;GO:0005388 calcium-transporting ATPase activity;GO:0006816 calcium ion transport;GO:0005516 calmodulin binding;GO:0005388 calcium-transporting ATPase activity;GO:0005794 Golgi apparatus;GO:0006828 manganese ion transport;GO:0055071 manganese ion homeostasis;GO:0005388 calcium-transporting ATPase activity;GO:0012505 endomembrane system;GO:0015410 man…
Pp1s10_147V6	3	518	7.6725		518	0	-38.0204		0	125	35.9582		0.0905141	18.8842	0	3.70584
Pp1s51_28V6	313	3858	3.86427		3858	99	-4.90388		99	9904	6.72458		9.44364	140.647	3.31503	293.621	PF00657,PF02469	PTHR22835:SF27				AT5G03610.1		GDSL-like Lipase/Acylhydrolase superfamily protein		GO:0004091 carboxylesterase activity;GO:0006629 lipid metabolic process;GO:0012505 endomembrane system;GO:0016788 "hydrolase activity, acting on ester bonds"
Pp1s256_30V6	11	110	3.56258		110	2	-5.40096		2	114	5.91303		0.331885	4.01016	0.0669704	3.37973	PF00067	PTHR19383	KOG0156			AT5G25130.1	CYP71B12	cytochrome P450, family 71, subfamily B, polypeptide 12	Limonene and pinene degradation;Stilbenoid, diarylheptanoid and gingerol biosynthesis;Metabolic pathways;Biosynthesis of secondary metabolites	GO:0004497 monooxygenase activity;GO:0005506 iron ion binding;GO:0009055 electron carrier activity;GO:0019825 oxygen binding;GO:0020037 heme binding;GO:0055114 oxidation-reduction process
Pp1s157_50V6	32	193	2.83311		193	28	-2.4047		28	1478	5.80221		0.965484	7.03601	0.937585	43.8179	PF03405			1.14.19.2	K03921	AT2G43710.2	SSI2	Plant stearoyl-acyl-carrier-protein desaturase family protein	Fatty acid biosynthesis;Biosynthesis of unsaturated fatty acids	GO:0004768 stearoyl-CoA 9-desaturase activity;GO:0006631 fatty acid metabolic process;GO:0006952 defense response;GO:0009695 jasmonic acid biosynthetic process;GO:0045300 acyl-[acyl-carrier-protein] desaturase activity;GO:0008610 lipid biosynthetic process;GO:0045300 acyl-[acyl-carrier-protein] desaturase activity;GO:0042742 defense response to bacterium;GO:0009570 chloroplast stroma;GO:0006636 u…
Pp1s38_44V6	48	187	2.20259		187	5	-4.84456		5	259	5.77502		1.44823	6.81728	0.167426	7.6785	PF00390,PF03949	PTHR23406	KOG1257	1.1.1.40	K00029	AT1G79750.1	NADP-ME4	NADP-malic enzyme 4	Pyruvate metabolism;Carbon fixation in photosynthetic organisms;Metabolic pathways	GO:0004470 malic enzyme activity;GO:0006108 malate metabolic process;GO:0016652 "oxidoreductase activity, acting on NADH or NADPH, NAD or NADP as acceptor";GO:0004473 malate dehydrogenase (oxaloacetate-decarboxylating) (NADP+) activity;GO:0006108 malate metabolic process;GO:0006108 malate metabolic process;GO:0006633 fatty acid biosynthetic process;GO:0009507 chloroplast;GO:0042803 protein homodi…
Pp1s51_160V6	27	319	3.80318		319	16	-3.93701		16	507	5.06598		0.814627	11.6295	0.535763	15.0309	PF08240,PF00107	PTHR11695	KOG1197			AT5G61510.1		GroES-like zinc-binding alcohol dehydrogenase family protein		GO:0003824 catalytic activity;GO:0005488 binding;GO:0008270 zinc ion binding;GO:0016491 oxidoreductase activity;GO:0009644 response to high light intensity;GO:0005829 cytosol;GO:0030154 cell differentiation
Pp1s38_15V6	63	264	2.30777		264	32	-2.66399		32	865	4.83669		1.9008	9.62439	1.07153	25.6444	PF00121	PTHR21139	KOG1643			AT2G21170.1	TIM	triosephosphate isomerase	Glycolysis / Gluconeogenesis;Fructose and mannose metabolism;Inositol phosphate metabolism;Carbon fixation in photosynthetic organisms;Metabolic pathways;Biosynthesis of secondary metabolites	GO:0004807 triose-phosphate isomerase activity;GO:0009507 chloroplast;GO:0019253 reductive pentose-phosphate cycle;GO:0009941 chloroplast envelope;GO:0005739 mitochondrion;GO:0009507 chloroplast;GO:0005515 protein binding;GO:0009570 chloroplast stroma;GO:0009579 thylakoid;GO:0009579 thylakoid;GO:0009507 chloroplast;GO:0009507 chloroplast;GO:0048046 apoplast;GO:0048046 apoplast;GO:0009570 chloropl…
Pp1s479_14V6	2175	176	-3.38671		176	31	-2.12483		31	822	4.80894		65.6227	6.41626	1.03804	24.3696	PF04107			6.3.2.2	K01919	AT4G23100.3	GSH1	glutamate-cysteine ligase	Glutathione metabolism;Metabolic pathways	GO:0009908 flower development;GO:0009507 chloroplast;GO:0004357 glutamate-cysteine ligase activity;GO:0006750 glutathione biosynthetic process;GO:0006750 glutathione biosynthetic process;GO:0009507 chloroplast;GO:0009408 response to heat;GO:0009570 chloroplast stroma;GO:0009753 response to jasmonic acid stimulus;GO:0010193 response to ozone;GO:0046686 response to cadmium ion;GO:0046686 response t…
Pp1s131_197V6	1068	176	-2.36061		176	27	-2.32414		27	697	4.77026		32.223	6.41626	0.9041	20.6638	PF01169	PTHR12608	KOG2881			AT4G13590.2		Uncharacterized protein family (UPF0016)		GO:0009706 chloroplast inner membrane;GO:0009941 chloroplast envelope;GO:0009507 chloroplast
Pp1s457_16V6	1236	217	-2.26926		217	33	-2.33675		33	797	4.67418		37.2918	7.91096	1.10501	23.6284	PF01585	PTHR23329	KOG2809			AT1G63980.1		D111/G-patch domain-containing protein		GO:0003676 nucleic acid binding;GO:0003676 nucleic acid binding;GO:0003676 nucleic acid binding;GO:0005622 intracellular;GO:0005622 intracellular;GO:0005622 intracellular;GO:0008150 biological_process
Pp1s119_22V6	363	43	-2.83691		43	159	2.26702		159	3591	4.57742		10.9522	1.56761	5.32414	106.461	PF08545,PF08541			2.3.1.180	K00648	AT1G62640.1	KAS III	3-ketoacyl-acyl carrier protein synthase III	Fatty acid biosynthesis;Metabolic pathways	GO:0003824 catalytic activity;GO:0003824 catalytic activity;GO:0004315 3-oxoacyl-[acyl-carrier-protein] synthase activity;GO:0004315 3-oxoacyl-[acyl-carrier-protein] synthase activity;GO:0004315 3-oxoacyl-[acyl-carrier-protein] synthase activity;GO:0006633 fatty acid biosynthetic process;GO:0006633 fatty acid biosynthetic process;GO:0006633 fatty acid biosynthetic process;GO:0008152 metabolic pro…
Pp1s379_42V6	37	1128	5.17075		1128	8	-6.75915		8	170	4.48953		1.11634	41.1224	0.267882	5.03994	PF02987	PTHR23241				AT4G36600.1		Late embryogenesis abundant (LEA) protein		GO:0003674 molecular_function;GO:0009793 embryo development ending in seed dormancy
Pp1s84_221V6	1004	210	-2.01664		210	7	-4.52649		7	147	4.47245		30.292	7.65577	0.234396	4.35807	PF00481	PTHR13832	KOG0698			AT2G33700.1		Protein phosphatase 2C family protein		GO:0003824 catalytic activity;GO:0004722 protein serine/threonine phosphatase activity;GO:0004722 protein serine/threonine phosphatase activity;GO:0006470 protein dephosphorylation
Pp1s5_126V6	1486	218	-2.52838		218	6	-4.80282		6	121	4.41404		44.8346	7.94742	0.200911	3.58725	PF04674					AT5G64260.1	EXL2	EXORDIUM like 2		GO:0003674 molecular_function;GO:0008150 biological_process;GO:0005618 cell wall;GO:0009505 plant-type cell wall;GO:0005829 cytosol
Pp1s8_183V6	539	103	-2.14699		103	11	-2.84667		11	203	4.28604		16.2624	3.75497	0.368337	6.01828	PF04588					AT3G05550.1		Hypoxia-responsive family protein		GO:0001666 response to hypoxia;GO:0003674 molecular_function;GO:0005575 cellular_component
Pp1s58_199V6	81	355	2.37248		355	25	-3.44742		25	358	3.9201		2.44388	12.9419	0.83713	10.6135	PF02518,PF01119	PTHR10073	KOG1979		K08734	AT4G09140.1	MLH1	MUTL-homologue 1	Mismatch repair	GO:0000795 synaptonemal complex;GO:0005712 chiasma;GO:0006200 ATP catabolic process;GO:0006298 mismatch repair;GO:0007131 reciprocal meiotic recombination;GO:0016887 ATPase activity;GO:0030983 mismatched DNA binding;GO:0032389 MutLalpha complex;GO:0032390 MutLbeta complex;GO:0006298 mismatch repair;GO:0030674 "protein binding, bridging";GO:0006312 mitotic recombination;GO:0009555 pollen developme…
Pp1s21_401V6	0	175	36.668		175	13	-3.37037		13	183	3.8954		0	6.37981	0.435307	5.42535
Pp1s58_112V6	44	156	2.06663		156	24	-2.32004		24	325	3.83947		1.32754	5.68714	0.803645	9.63519	PF02225,PF00097	PTHR22765	KOG4628			AT1G71980.1		Protease-associated (PA) RING/U-box zinc finger family protein		GO:0008233 peptidase activity;GO:0008270 zinc ion binding;GO:0008270 zinc ion binding
Pp1s3_465V6	85	685	3.25122		685	25	-4.3957		25	280	3.56556		2.56457	24.9724	0.83713	8.30108	PF00199,PF06628	PTHR11465	KOG0047	1.11.1.6	K03781	AT1G20630.1	CAT1	catalase 1	Tryptophan metabolism;Metabolic pathways;Peroxisome	GO:0004096 catalase activity;GO:0009941 chloroplast envelope;GO:0005777 peroxisome;GO:0005739 mitochondrion;GO:0006995 cellular response to nitrogen starvation;GO:0009970 cellular response to sulfate starvation;GO:0016036 cellular response to phosphate starvation;GO:0009416 response to light stimulus;GO:0022626 cytosolic ribosome;GO:0005618 cell wall;GO:0046686 response to cadmium ion;GO:0005777 …
Pp1s496_1V6	410	1784	2.36208		1784	303	-2.17732		303	3332	3.53914		12.3703	65.0376	10.146	98.7829	PF00171	PTHR11699	KOG2450	1.2.1.3	K00128	AT3G48000.1	ALDH2B4	aldehyde dehydrogenase 2B4	Glycolysis / Gluconeogenesis;Pentose and glucuronate interconversions;Ascorbate and aldarate metabolism;Fatty acid metabolism;Valine, leucine and isoleucine degradation;Lysine degradation;Arginine and proline metabolism;Histidine metabolism;Tryptophan metabolism;beta-Alanine metabolism;Glycerolipid metabolism;Pyruvate metabolism;Propanoate metabolism;Limonene and pinene degradation;Metabolic path…	GO:0004028 3-chloroallyl aldehyde dehydrogenase activity;GO:0005739 mitochondrion;GO:0004029 aldehyde dehydrogenase (NAD) activity;GO:0005739 mitochondrion;GO:0009507 chloroplast;GO:0046686 response to cadmium ion;GO:0005524 ATP binding;GO:0005739 mitochondrion;GO:0005739 mitochondrion
Pp1s199_16V6	805	101	-2.75398		101	14	-2.47045		14	147	3.47245		24.2879	3.68206	0.468793	4.35807	PF08783,PF00097	PTHR15439				AT5G47430.1		DWNN domain, a CCHC-type zinc finger		GO:0003676 nucleic acid binding;GO:0003676 nucleic acid binding;GO:0008150 biological_process;GO:0008270 zinc ion binding;GO:0008270 zinc ion binding;GO:0008270 zinc ion binding
Pp1s52_261V6	548	25237	5.76588		25237	3613	-2.42387		3613	33573	3.29617		16.5339	920.041	120.982	995.329
Pp1s38_243V6	1308	209	-2.40513		209	20	-3.00503		20	168	3.15053		39.4641	7.61931	0.669704	4.98065	PF08242	PTHR11006	KOG1500	2.1.1.125	K05931	AT3G06930.2	PRMT4B	protein arginine methyltransferase 4B		GO:0008168 methyltransferase activity;GO:0005634 nucleus;GO:0005737 cytoplasm;GO:0008469 histone-arginine N-methyltransferase activity;GO:0009909 regulation of flower development;GO:0010228 vegetative to reproductive phase transition of meristem;GO:0016277 [myelin basic protein]-arginine N-methyltransferase activity;GO:0019919 "peptidyl-arginine methylation, to asymmetrical-dimethyl arginine";GO:…
Pp1s119_47V6	898	101	-2.9117		101	14	-2.47045		14	115	3.11827		27.0939	3.68206	0.468793	3.40937	PF00324	PTHR11785	KOG1286			AT5G36940.1	CAT3	cationic amino acid transporter 3		GO:0005739 mitochondrion;GO:0006810 transport;GO:0006865 amino acid transport;GO:0015326 cationic amino acid transmembrane transporter activity;GO:0016020 membrane;GO:0055085 transmembrane transport;GO:0015174 basic amino acid transmembrane transporter activity
Pp1s111_37V6	536	40	-3.50351		40	224	2.86583		224	1702	3.0058		16.1719	1.45824	7.50068	50.4587	PF01593,PF02353,PF08241,PF08242	PTHR10742		2.1.1.79	K00574	AT3G23510.1		Cyclopropane-fatty-acyl-phospholipid synthase		GO:0008610 lipid biosynthetic process;GO:0008610 lipid biosynthetic process;GO:0008825 cyclopropane-fatty-acyl-phospholipid synthase activity;GO:0012505 endomembrane system
Pp1s2_113V6	126	1323	3.63297		1323	29	-5.13121		29	173	2.65678		3.80159	48.2313	0.97107	5.12888	PF01053	PTHR11808	KOG0053	4.4.1.11	K01761	AT1G64660.1	MGL	methionine gamma-lyase	Cysteine and methionine metabolism;Selenoamino acid metabolism	GO:0003824 catalytic activity;GO:0006520 cellular amino acid metabolic process;GO:0005829 cytosol;GO:0018826 methionine gamma-lyase activity;GO:0019458 methionine catabolic process via 2-oxobutanoate
Pp1s32_270V6	19	251	3.96427		251	36	-2.42122		36	207	2.6037		0.573256	9.15046	1.20547	6.13687
Pp1s218_100V6	242	2187	3.41653		2187	198	-3.08498		198	1044	2.47869		7.30147	79.7294	6.63007	30.9512						AT4G38810.2		Calcium-binding EF-hand family protein		GO:0005509 calcium ion binding;GO:0005509 calcium ion binding;GO:0005575 cellular_component
Pp1s65_246V6	16	1249	6.52721		1249	105	-3.19191		105	530	2.41574		0.482742	45.5336	3.51594	15.7128	PF08240,PF00107	PTHR11695	KOG0024			AT1G32780.1		GroES-like zinc-binding dehydrogenase family protein	Glycolysis / Gluconeogenesis;Fatty acid metabolism;Tyrosine metabolism;Metabolic pathways;Biosynthesis of secondary metabolites	GO:0008270 zinc ion binding;GO:0016491 oxidoreductase activity;GO:0055114 oxidation-reduction process
Pp1s37_251V6	17	1420	6.62487		1420	25	-5.44742		25	123	2.3788		0.512913	51.7676	0.83713	3.64655
Pp1s90_50V6	242	4	-5.67821		4	109	5.14859		109	530	2.3618		7.30147	0.145824	3.64989	15.7128	PF00160	PTHR11071	KOG0881			AT3G01480.1	CYP38	cyclophilin 38		GO:0003755 peptidyl-prolyl cis-trans isomerase activity;GO:0003755 peptidyl-prolyl cis-trans isomerase activity;GO:0003755 peptidyl-prolyl cis-trans isomerase activity;GO:0006457 protein folding;GO:0009543 chloroplast thylakoid lumen;GO:0009543 chloroplast thylakoid lumen;GO:0031977 thylakoid lumen;GO:0009543 chloroplast thylakoid lumen;GO:0009579 thylakoid;GO:0009507 chloroplast;GO:0009535 chlor…
Pp1s12_126V6	17	3643	7.9841		3643	551	-2.3446		551	2673	2.35847		0.512913	132.809	18.4503	79.2457	PF00578,PF10417	PTHR10681	KOG0854	1.11.1.15,1.11.1.7,3.1.1.-	K11188	AT1G48130.1	PER1	1-cysteine peroxiredoxin 1	Phenylalanine metabolism;Phenylpropanoid biosynthesis;Metabolic pathways;Biosynthesis of secondary metabolites	GO:0005575 cellular_component;GO:0016209 antioxidant activity;GO:0008379 thioredoxin peroxidase activity;GO:0009269 response to desiccation;GO:0010231 maintenance of seed dormancy
Pp1s215_36V6	4223	295	-3.59883		295	1329	2.55196		1329	6380	2.34335		127.414	10.7545	44.5018	189.146						AT5G19730.1		Pectin lyase-like superfamily protein	Pentose and glucuronate interconversions;Starch and sucrose metabolism;Metabolic pathways	GO:0009505 plant-type cell wall;GO:0030599 pectinesterase activity;GO:0030599 pectinesterase activity;GO:0042545 cell wall modification;GO:0005618 cell wall;GO:0005737 cytoplasm
Pp1s291_22V6	112	1198	3.65971		1198	54	-4.09112		54	248	2.27945		3.37919	43.6743	1.8082	7.35239	PF05564					AT1G28330.3	DYL1	dormancy-associated protein-like 1		GO:0003674 molecular_function;GO:0005575 cellular_component;GO:0009744 response to sucrose stimulus;GO:0009749 response to glucose stimulus;GO:0009750 response to fructose stimulus
Pp1s23_96V6	288	26	-3.22883		26	232	3.53794		232	1056	2.26655		8.68935	0.947857	7.76856	31.3069	PF00504	PTHR21649				AT2G05070.1	LHCB2.2	photosystem II light harvesting complex gene 2.2	Photosynthesis - antenna proteins;Metabolic pathways	GO:0009765 "photosynthesis, light harvesting";GO:0015979 photosynthesis;GO:0016168 chlorophyll binding;GO:0030076 light-harvesting complex;GO:0009941 chloroplast envelope;GO:0009535 chloroplast thylakoid membrane;GO:0009507 chloroplast;GO:0009535 chloroplast thylakoid membrane;GO:0009535 chloroplast thylakoid membrane;GO:0010287 plastoglobule;GO:0005774 vacuolar membrane;GO:0009507 chloroplast;GO…
Pp1s72_203V6	6	197	5.27774		197	37	-2.0322		37	165	2.23701		0.181028	7.18184	1.23895	4.89171
Pp1s34_112V6	3229	201	-3.76516		201	38	-2.02272		38	163	2.18094		97.4233	7.32766	1.27244	4.83242	PF01106	PTHR11178	KOG2358			AT5G49940.1	NFU2	NIFU-like protein 2		GO:0005198 structural molecule activity;GO:0009507 chloroplast;GO:0016226 iron-sulfur cluster assembly;GO:0009507 chloroplast;GO:0009658 chloroplast organization;GO:0016226 iron-sulfur cluster assembly;GO:0009507 chloroplast;GO:0009507 chloroplast
Pp1s144_8V6	629	94	-2.50167		94	295	2.03038		295	1202	2.10679		18.9778	3.42687	9.87813	35.6354	PF07732,PF00394,PF07731	PTHR11709	KOG1263			AT5G21105.1		Plant L-ascorbate oxidase		GO:0005507 copper ion binding;GO:0005507 copper ion binding;GO:0005507 copper ion binding;GO:0005507 copper ion binding;GO:0008447 L-ascorbate oxidase activity;GO:0008447 L-ascorbate oxidase activity;GO:0008447 L-ascorbate oxidase activity;GO:0008447 L-ascorbate oxidase activity;GO:0016491 oxidoreductase activity;GO:0016491 oxidoreductase activity;GO:0016491 oxidoreductase activity;GO:0055114 oxi…
Pp1s283_20V6	15	250	4.29955		250	27	-2.83049		27	109	2.09343		0.45257	9.11401	0.9041	3.23149	PF01776	PTHR10064	KOG3434			AT3G05560.1		Ribosomal L22e protein family		GO:0003735 structural constituent of ribosome;GO:0003735 structural constituent of ribosome;GO:0003735 structural constituent of ribosome;GO:0005840 ribosome;GO:0006412 translation;GO:0006412 translation;GO:0006412 translation;GO:0005730 nucleolus;GO:0005730 nucleolus;GO:0022626 cytosolic ribosome;GO:0022626 cytosolic ribosome;GO:0022626 cytosolic ribosome;GO:0022626 cytosolic ribosome;GO:0022626…
Pp1s37_249V6	49	3142	6.24341		3142	404	-2.57885		404	1565	2.03387		1.4784	114.545	13.528	46.3971	PF00230	PTHR19139				AT4G10380.1	NIP5;1	NOD26-like intrinsic protein 5;1		GO:0006810 transport;GO:0015250 water channel activity;GO:0016020 membrane;GO:0005886 plasma membrane;GO:0010036 response to boron-containing substance;GO:0010036 response to boron-containing substance;GO:0015250 water channel activity;GO:0046713 borate transport;GO:0046715 borate transmembrane transporter activity;GO:0080138 borate uptake transmembrane transporter activity;GO:0080029 cellular re…
Pp1s309_77V6	191	23	-2.81321		23	331	4.22753		331	76	-2.04262		5.76273	0.838489	11.0836	2.25315	PF00187,PF00182	PTHR22595	KOG4742			AT3G12500.1	HCHIB	basic chitinase	Amino sugar and nucleotide sugar metabolism	GO:0004568 chitinase activity;GO:0004568 chitinase activity;GO:0050832 defense response to fungus;GO:0005773 vacuole;GO:0046686 response to cadmium ion;GO:0005774 vacuolar membrane;GO:0005829 cytosol;GO:0009871 "jasmonic acid and ethylene-dependent systemic resistance, ethylene mediated signaling pathway"
Pp1s9_355V6	238	25	-3.01031		25	195	3.34388		195	43	-2.10093		7.18078	0.911401	6.52961	1.27481	PF00301					AT5G51010.1		Rubredoxin-like superfamily protein		GO:0009055 electron carrier activity;GO:0046872 metal ion binding;GO:0046872 metal ion binding
Pp1s185_110V6	823	105	-2.72985		105	6087	6.23767		6087	1318	-2.12724		24.831	3.82788	203.824	39.0744	PF07123				K02721	AT2G30570.1	PSBW	photosystem II reaction center W	Photosynthesis;Metabolic pathways	GO:0003674 molecular_function;GO:0009535 chloroplast thylakoid membrane;GO:0042549 photosystem II stabilization
Pp1s38_300V6	544	64	-2.84681		64	963	4.29179		963	202	-2.17304		16.4132	2.33319	32.2462	5.98864	PF00056,PF02866	PTHR11540	KOG1494	1.1.1.37	K00026	AT2G22780.1	PMDH1	peroxisomal NAD-malate dehydrogenase 1	Citrate cycle (TCA cycle);Pyruvate metabolism;Glyoxylate and dicarboxylate metabolism;Carbon fixation in photosynthetic organisms;Metabolic pathways;Biosynthesis of secondary metabolites	GO:0003824 catalytic activity;GO:0005488 binding;GO:0016491 oxidoreductase activity;GO:0016615 malate dehydrogenase activity;GO:0016615 malate dehydrogenase activity;GO:0016616 "oxidoreductase activity, acting on the CH-OH group of donors, NAD or NADP as acceptor";GO:0030060 L-malate dehydrogenase activity;GO:0005777 peroxisome;GO:0005777 peroxisome;GO:0031998 regulation of fatty acid beta-oxidat…
Pp1s86_219V6	248	5	-5.39161		5	139	5.17742		139	29	-2.18082		7.4825	0.18228	4.65444	0.859755
Pp1s103_66V6	226	37	-2.37007		37	231	3.0227		231	48	-2.18665		6.81873	1.34887	7.73508	1.42304	PF00430					AT4G32260.1		ATPase, F0 complex, subunit B/B\', bacterial/chloroplast	Oxidative phosphorylation;Photosynthesis;Metabolic pathways	GO:0015078 hydrogen ion transmembrane transporter activity;GO:0009941 chloroplast envelope;GO:0009535 chloroplast thylakoid membrane;GO:0009579 thylakoid;GO:0009507 chloroplast;GO:0009535 chloroplast thylakoid membrane;GO:0009535 chloroplast thylakoid membrane;GO:0042742 defense response to bacterium;GO:0016020 membrane;GO:0009507 chloroplast;GO:0009579 thylakoid
Pp1s146_112V6	281	50	-2.24991		50	1003	4.70665		1003	207	-2.19648		8.47815	1.8228	33.5856	6.13687		PTHR19410	KOG1208	1.3.1.33	K00218	AT5G54190.1	PORA	protochlorophyllide oxidoreductase A	Porphyrin and chlorophyll metabolism;Metabolic pathways;Biosynthesis of secondary metabolites	GO:0016491 oxidoreductase activity;GO:0016630 protochlorophyllide reductase activity;GO:0009723 response to ethylene stimulus;GO:0015995 chlorophyll biosynthetic process;GO:0016630 protochlorophyllide reductase activity;GO:0009507 chloroplast
Pp1s20_372V6	130	19	-2.53378		19	509	5.124		509	101	-2.25317		3.92228	0.692665	17.044	2.99432
Pp1s131_154V6	902	79	-3.27255		79	1151	4.24529		1151	224	-2.28118		27.2146	2.88003	38.5415	6.64087	PF00175	PTHR19384		1.18.1.2	K02641	AT4G05390.1	RFNR1	root FNR 1	Photosynthesis;Metabolic pathways	GO:0009507 chloroplast;GO:0009507 chloroplast;GO:0016491 oxidoreductase activity;GO:0042651 thylakoid membrane;GO:0042651 thylakoid membrane;GO:0055114 oxidation-reduction process;GO:0055114 oxidation-reduction process;GO:0005507 copper ion binding
Pp1s264_55V6	2959	47	-5.73565		47	1854	5.68224		1854	358	-2.29247		89.2771	1.71343	62.0815	10.6135	PF00484	PTHR11002	KOG1578			AT3G01500.2	CA1	carbonic anhydrase 1	Nitrogen metabolism	GO:0004089 carbonate dehydratase activity;GO:0004089 carbonate dehydratase activity;GO:0004089 carbonate dehydratase activity;GO:0004089 carbonate dehydratase activity;GO:0008270 zinc ion binding;GO:0008270 zinc ion binding;GO:0008270 zinc ion binding;GO:0008270 zinc ion binding;GO:0015976 carbon utilization;GO:0009579 thylakoid;GO:0009579 thylakoid;GO:0009579 thylakoid;GO:0009941 chloroplast env…
Pp1s182_26V6	1577	257	-2.37669		257	1246	2.65787		1246	239	-2.30208		47.5802	9.3692	41.7225	7.08557	PF05757					AT4G21280.1	PSBQA	photosystem II subunit QA	Photosynthesis;Metabolic pathways	GO:0005509 calcium ion binding;GO:0005509 calcium ion binding;GO:0009654 oxygen evolving complex;GO:0030095 chloroplast photosystem II;GO:0009543 chloroplast thylakoid lumen;GO:0031977 thylakoid lumen;GO:0009543 chloroplast thylakoid lumen;GO:0009579 thylakoid;GO:0009535 chloroplast thylakoid membrane;GO:0009579 thylakoid;GO:0009507 chloroplast;GO:0009535 chloroplast thylakoid membrane;GO:0009535…
Pp1s200_69V6	765	133	-2.28338		133	961	3.23351		961	184	-2.30469		23.0811	4.84865	32.1793	5.455	PF00466					AT5G13510.1		Ribosomal protein L10 family protein		GO:0003735 structural constituent of ribosome;GO:0005840 ribosome;GO:0006412 translation;GO:0042254 ribosome biogenesis;GO:0022626 cytosolic ribosome;GO:0022626 cytosolic ribosome;GO:0009570 chloroplast stroma;GO:0009507 chloroplast
Pp1s14_288V6	371	68	-2.20716		68	243	2.21775		243	44	-2.38524		11.1936	2.47901	8.1369	1.30446	PF08041					AT2G26500.1		cytochrome b6f complex subunit (petM), putative		GO:0009496 plastoquinol-plastocyanin reductase activity;GO:0009535 chloroplast thylakoid membrane;GO:0009535 chloroplast thylakoid membrane;GO:0009535 chloroplast thylakoid membrane
Pp1s3_7V6	7	153	4.69069		153	485	2.04486		485	87	-2.39876		0.2112	5.57777	16.2403	2.57926	PF05512					AT1G04560.1		AWPM-19-like family protein		GO:0003674 molecular_function;GO:0008150 biological_process;GO:0012505 endomembrane system
Pp1s197_146V6	192	19	-3.09638		19	174	3.57542		174	31	-2.40861		5.7929	0.692665	5.82642	0.919048	PF03460,PF01077		KOG0560	1.7.7.1	K00366	AT2G15620.1	NIR1	nitrite reductase 1	Nitrogen metabolism	GO:0047889 ferredoxin-nitrate reductase activity;GO:0005739 mitochondrion;GO:0009507 chloroplast;GO:0005515 protein binding;GO:0009570 chloroplast stroma;GO:0016020 membrane;GO:0009507 chloroplast;GO:0048046 apoplast;GO:0009570 chloroplast stroma;GO:0010167 response to nitrate;GO:0005829 cytosol;GO:0050421 nitrite reductase (NO-forming) activity
Pp1s105_81V6	317	43	-2.64142		43	312	3.23954		312	54	-2.45038		9.56432	1.56761	10.4474	1.60092	PF00010					AT2G16910.1	AMS	basic helix-loop-helix (bHLH) DNA-binding superfamily protein		GO:0003677 DNA binding;GO:0005634 nucleus;GO:0003700 sequence-specific DNA binding transcription factor activity;GO:0006355 "regulation of transcription, DNA-dependent";GO:0003700 sequence-specific DNA binding transcription factor activity;GO:0009555 pollen development;GO:0048658 tapetal layer development
Pp1s27_326V6	954	85	-3.2478		85	713	3.44877		713	123	-2.45511		28.7835	3.09876	23.8749	3.64655	PF00468					AT1G29070.1		Ribosomal protein L34		GO:0003735 structural constituent of ribosome;GO:0003735 structural constituent of ribosome;GO:0005622 intracellular;GO:0005840 ribosome;GO:0005840 ribosome;GO:0006412 translation;GO:0006412 translation;GO:0009507 chloroplast;GO:0042254 ribosome biogenesis
Pp1s258_80V6	417	77	-2.19646		77	2623	5.47062		2623	447	-2.47273		12.5815	2.80711	87.8316	13.2521						AT2G38140.1	PSRP4	plastid-specific ribosomal protein 4		GO:0003735 structural constituent of ribosome;GO:0005840 ribosome;GO:0006412 translation;GO:0009507 chloroplast
Pp1s242_95V6	449	31	-3.61572		31	270	3.50302		270	46	-2.47312		13.5469	1.13014	9.041	1.36375	PF00542	PTHR11809	KOG1715			AT3G27850.1	RPL12-C	ribosomal protein L12-C	Ribosome	GO:0003735 structural constituent of ribosome;GO:0003735 structural constituent of ribosome;GO:0006412 translation;GO:0015934 large ribosomal subunit;GO:0009579 thylakoid;GO:0009535 chloroplast thylakoid membrane;GO:0009579 thylakoid;GO:0009507 chloroplast;GO:0009535 chloroplast thylakoid membrane;GO:0009535 chloroplast thylakoid membrane;GO:0009579 thylakoid;GO:0042742 defense response to bacter…
Pp1s215_12V6	199	29	-2.53799		29	221	3.31032		221	37	-2.49831		6.0041	1.05723	7.40023	1.09693						AT4G13220.1				GO:0003674 molecular_function;GO:0008150 biological_process;GO:0009507 chloroplast
Pp1s372_25V6	152	14	-3.19992		14	324	4.9129		324	54	-2.50483		4.58605	0.510385	10.8492	1.60092	PF08242,PF08241,PF07109	PTHR18895	KOG1270	2.1.1.11	K03428	AT4G25080.2	CHLM	magnesium-protoporphyrin IX methyltransferase	Porphyrin and chlorophyll metabolism;Metabolic pathways;Biosynthesis of secondary metabolites	GO:0009535 chloroplast thylakoid membrane;GO:0009941 chloroplast envelope;GO:0015995 chlorophyll biosynthetic process;GO:0046406 magnesium protoporphyrin IX methyltransferase activity;GO:0009941 chloroplast envelope;GO:0009941 chloroplast envelope;GO:0009941 chloroplast envelope;GO:0009507 chloroplast;GO:0009507 chloroplast;GO:0009507 chloroplast;GO:0015995 chlorophyll biosynthetic process;GO:000…
Pp1s232_23V6	150	21	-2.59585		21	175	3.4393		175	29	-2.51309		4.5257	0.765577	5.85991	0.859755	PF02225	PTHR10795				AT4G34980.1	SLP2	subtilisin-like serine protease 2		GO:0004252 serine-type endopeptidase activity;GO:0005618 cell wall;GO:0006508 proteolysis;GO:0008152 metabolic process;GO:0008236 serine-type peptidase activity;GO:0009827 plant-type cell wall modification;GO:0048196 middle lamella-containing extracellular matrix;GO:0016020 membrane
Pp1s196_76V6	720	111	-2.45678		111	1012	3.56898		1012	165	-2.53653		21.7234	4.04662	33.887	4.89171	PF00687	PTHR23105	KOG1569			AT3G63490.1		Ribosomal protein L1p/L10e family		GO:0003723 RNA binding;GO:0003723 RNA binding;GO:0003735 structural constituent of ribosome;GO:0003735 structural constituent of ribosome;GO:0003735 structural constituent of ribosome;GO:0005840 ribosome;GO:0006396 RNA processing;GO:0006396 RNA processing;GO:0006412 translation;GO:0006412 translation;GO:0006412 translation;GO:0005634 nucleus;GO:0009507 chloroplast;GO:0009535 chloroplast thylakoid…
Pp1s152_173V6	602	75	-2.76415		75	302	2.38999		302	49	-2.54356		18.1632	2.7342	10.1125	1.45269	PF00572	PTHR11545	KOG3203		K02871	AT1G78630.1	emb1473	Ribosomal protein L13 family protein	Ribosome	GO:0003735 structural constituent of ribosome;GO:0003735 structural constituent of ribosome;GO:0005840 ribosome;GO:0006412 translation;GO:0009793 embryo development ending in seed dormancy;GO:0009579 thylakoid;GO:0009570 chloroplast stroma;GO:0009507 chloroplast;GO:0009570 chloroplast stroma
Pp1s19_202V6	154	24	-2.44117		24	729	5.30521		729	118	-2.54699		4.64639	0.874945	24.4107	3.49831	PF01016	PTHR15893	KOG4600			AT5G40950.1	RPL27	ribosomal protein large subunit 27		GO:0003735 structural constituent of ribosome;GO:0003735 structural constituent of ribosome;GO:0005840 ribosome;GO:0006412 translation;GO:0006412 translation;GO:0009579 thylakoid;GO:0009507 chloroplast;GO:0009570 chloroplast stroma;GO:0009507 chloroplast
Pp1s421_3V6	916	70	-3.46927		70	4341	6.33493		4341	690	-2.57322		27.637	2.55192	145.359	20.4562	PF01716				K02716	AT3G50820.1	PSBO2	photosystem II subunit O-2	Photosynthesis;Metabolic pathways	GO:0009654 oxygen evolving complex;GO:0030095 chloroplast photosystem II;GO:0009543 chloroplast thylakoid lumen;GO:0031977 thylakoid lumen;GO:0009543 chloroplast thylakoid lumen;GO:0009579 thylakoid;GO:0010242 oxygen evolving activity;GO:0019684 "photosynthesis, light reaction";GO:0009535 chloroplast thylakoid membrane;GO:0009579 thylakoid;GO:0009507 chloroplast;GO:0009535 chloroplast thylakoid m…
Pp1s409_2V6	281	33	-2.84938		33	229	3.17521		229	36	-2.58914		8.47815	1.20305	7.66811	1.06728	PF00544					AT4G13710.1		Pectin lyase-like superfamily protein	Pentose and glucuronate interconversions	GO:0008150 biological_process;GO:0012505 endomembrane system;GO:0012505 endomembrane system;GO:0016829 lyase activity;GO:0030570 pectate lyase activity
Pp1s296_59V6	603	10	-5.67343		10	2149	8.12792		2149	328	-2.63176		18.1933	0.36456	71.9597	9.72413
Pp1s91_60V6	195	37	-2.15722		37	721	4.6648		721	109	-2.64553		5.88342	1.34887	24.1428	3.23149	PF00076	PTHR10432	KOG0131			AT3G53460.2	CP29	chloroplast RNA-binding protein 29		GO:0003723 RNA binding;GO:0009579 thylakoid;GO:0009579 thylakoid;GO:0009579 thylakoid;GO:0009579 thylakoid;GO:0008266 poly(U) RNA binding;GO:0009507 chloroplast;GO:0009507 chloroplast;GO:0009570 chloroplast stroma;GO:0003723 RNA binding;GO:0003723 RNA binding;GO:0009507 chloroplast;GO:0009507 chloroplast
Pp1s211_107V6	317	53	-2.33976		53	242	2.57135		242	35	-2.70944		9.56432	1.93217	8.10342	1.03764						AT2G02500.1	ISPD	Nucleotide-diphospho-sugar transferases superfamily protein	Terpenoid backbone biosynthesis;Metabolic pathways;Biosynthesis of secondary metabolites	GO:0009536 plastid;GO:0019288 "isopentenyl diphosphate biosynthetic process, mevalonate-independent pathway";GO:0050518 2-C-methyl-D-erythritol 4-phosphate cytidylyltransferase activity;GO:0009570 chloroplast stroma;GO:0009507 chloroplast;GO:0009570 chloroplast stroma
Pp1s38_249V6	156	10	-3.72282		10	450	5.87226		450	65	-2.71128		4.70673	0.36456	15.0683	1.92704	PF00886	PTHR12919	KOG3419			AT5G56940.1		Ribosomal protein S16 family protein		GO:0003735 structural constituent of ribosome;GO:0003735 structural constituent of ribosome;GO:0005840 ribosome;GO:0006412 translation;GO:0006412 translation;GO:0042254 ribosome biogenesis;GO:0005739 mitochondrion;GO:0009536 plastid
Pp1s174_47V6	131	0	-36.0096		0	215	37.1322		215	31	-2.71386		3.95245	0	7.19932	0.919048	PF00378	PTHR11941	KOG1680	4.1.3.36	K01661	AT1G60550.1	ECHID	enoyl-CoA hydratase/isomerase D	Ubiquinone and other terpenoid-quinone biosynthesis;Metabolic pathways;Biosynthesis of secondary metabolites	GO:0003824 catalytic activity;GO:0008152 metabolic process;GO:0008935 "1,4-dihydroxy-2-naphthoyl-CoA synthase activity";GO:0008935 "1,4-dihydroxy-2-naphthoyl-CoA synthase activity";GO:0009234 menaquinone biosynthetic process;GO:0042371 vitamin K biosynthetic process;GO:0005777 peroxisome;GO:0005777 peroxisome
Pp1s11_275V6	398	18	-4.22604		18	737	5.736		737	104	-2.74494		12.0082	0.656209	24.6786	3.08326	PF00366	PTHR10744			K02961	AT1G79850.1	RPS17	ribosomal protein S17	Ribosome	GO:0003735 structural constituent of ribosome;GO:0003735 structural constituent of ribosome;GO:0006412 translation;GO:0006412 translation;GO:0022627 cytosolic small ribosomal subunit;GO:0009941 chloroplast envelope;GO:0009507 chloroplast;GO:0009570 chloroplast stroma;GO:0009507 chloroplast;GO:0000312 plastid small ribosomal subunit
Pp1s63_96V6	109	15	-2.62064		15	490	5.41015		490	68	-2.76904		3.28868	0.546841	16.4077	2.01598	PF04172					AT1G32080.1		membrane protein, putative		GO:0009706 chloroplast inner membrane;GO:0009941 chloroplast envelope;GO:0009941 chloroplast envelope;GO:0009507 chloroplast;GO:0016020 membrane;GO:0009507 chloroplast
Pp1s17_355V6	1251	52	-4.34777		52	518	3.69677		518	70	-2.80739		37.7444	1.89571	17.3453	2.07527	PF00657					AT3G26430.1		GDSL-like Lipase/Acylhydrolase superfamily protein		GO:0004091 carboxylesterase activity;GO:0006629 lipid metabolic process;GO:0012505 endomembrane system;GO:0016788 "hydrolase activity, acting on ester bonds"
Pp1s255_55V6	362	41	-2.90164		41	1652	5.71285		1652	220	-2.8285		10.922	1.4947	55.3175	6.52228	PF00581					AT5G23060.1	CaS	calcium sensing receptor		GO:0005739 mitochondrion;GO:0009535 chloroplast thylakoid membrane;GO:0009507 chloroplast;GO:0009535 chloroplast thylakoid membrane;GO:0009535 chloroplast thylakoid membrane;GO:0009507 chloroplast;GO:0009507 chloroplast;GO:0009579 thylakoid;GO:0071277 cellular response to calcium ion;GO:0090333 regulation of stomatal closure;GO:0009579 thylakoid
Pp1s3_520V6	1513	66	-4.27815		66	755	3.89634		755	99	-2.85084		45.6493	2.4061	25.2813	2.93503	PF00127				K02638	AT1G76100.1	PETE1	plastocyanin 1	Photosynthesis	GO:0005507 copper ion binding;GO:0005507 copper ion binding;GO:0009055 electron carrier activity;GO:0009543 chloroplast thylakoid lumen;GO:0031977 thylakoid lumen;GO:0009543 chloroplast thylakoid lumen;GO:0009579 thylakoid;GO:0009579 thylakoid;GO:0009507 chloroplast;GO:0046688 response to copper ion
Pp1s212_78V6	109	8	-3.52753		8	327	5.73355		327	42	-2.88069		3.28868	0.291648	10.9497	1.24516	PF00828	PTHR12934	KOG0846			AT3G25920.1	RPL15	ribosomal protein L15	Ribosome	GO:0009507 chloroplast;GO:0000311 plastid large ribosomal subunit;GO:0003735 structural constituent of ribosome;GO:0006412 translation;GO:0009570 chloroplast stroma;GO:0009507 chloroplast;GO:0009570 chloroplast stroma
Pp1s5_384V6	3661	771	-2.00678		771	7685	3.69764		7685	984	-2.88518		110.457	28.1076	257.334	29.1724	PF01241				K02698	AT1G30380.1	PSAK	photosystem I subunit K	Photosynthesis;Metabolic pathways	GO:0003674 molecular_function;GO:0009522 photosystem I;GO:0015979 photosynthesis;GO:0015979 photosynthesis;GO:0016020 membrane;GO:0009535 chloroplast thylakoid membrane;GO:0009535 chloroplast thylakoid membrane;GO:0009535 chloroplast thylakoid membrane;GO:0009507 chloroplast;GO:0009579 thylakoid
Pp1s258_19V6	551	66	-2.82086		66	481	3.2459		481	60	-2.92286		16.6244	2.4061	16.1064	1.7788	PF00416	PTHR10871	KOG3311		K02952	AT5G14320.1		Ribosomal protein S13/S18 family		GO:0003676 nucleic acid binding;GO:0003676 nucleic acid binding;GO:0003723 RNA binding;GO:0003723 RNA binding;GO:0003735 structural constituent of ribosome;GO:0003735 structural constituent of ribosome;GO:0003735 structural constituent of ribosome;GO:0006412 translation;GO:0006412 translation;GO:0006412 translation;GO:0015935 small ribosomal subunit;GO:0042254 ribosome biogenesis;GO:0009941 chlor…
Pp1s171_5V6	325	2581	3.23007		2581	210	-3.23907		210	26	-2.93367		9.80569	94.093	7.03189	0.770815		PTHR10190				AT2G35320.1	EYA	EYES ABSENT homolog		GO:0005575 cellular_component;GO:0006470 protein dephosphorylation;GO:0030946 "protein tyrosine phosphatase activity, metal-dependent"
Pp1s15_356V6	249	48	-2.13438		48	677	4.19845		677	81	-2.98302		7.51267	1.74989	22.6695	2.40138	PF02458					AT5G48930.1	HCT	hydroxycinnamoyl-CoA shikimate/quinate hydroxycinnamoyl transferase	Phenylpropanoid biosynthesis;Flavonoid biosynthesis;Stilbenoid, diarylheptanoid and gingerol biosynthesis;Biosynthesis of secondary metabolites	GO:0016740 transferase activity;GO:0047172 shikimate O-hydroxycinnamoyltransferase activity;GO:0047205 quinate O-hydroxycinnamoyltransferase activity;GO:0009809 lignin biosynthetic process;GO:0009963 positive regulation of flavonoid biosynthetic process;GO:0010252 auxin homeostasis;GO:0005829 cytosol
Pp1s153_72V6	268	37	-2.61598		37	2055	6.17587		2055	245	-2.98815		8.08593	1.34887	68.8121	7.26345	PF00316	PTHR11556	KOG1458	3.1.3.11	K03841	AT3G54050.1	HCEF1	high cyclic electron flow 1	Glycolysis / Gluconeogenesis;Pentose phosphate pathway;Fructose and mannose metabolism;Carbon fixation in photosynthetic organisms;Metabolic pathways;Biosynthesis of secondary metabolites	GO:0006000 fructose metabolic process;GO:0042132 "fructose 1,6-bisphosphate 1-phosphatase activity";GO:0009507 chloroplast;GO:0005985 sucrose metabolic process;GO:0015979 photosynthesis;GO:0030388 "fructose 1,6-bisphosphate metabolic process";GO:0042132 "fructose 1,6-bisphosphate 1-phosphatase activity";GO:0009570 chloroplast stroma;GO:0009409 response to cold;GO:0010319 stromule;GO:0009507 chlor…
Pp1s6_313V6	2259	230	-3.05532		230	7519	5.41124		7519	894	-2.99206		68.1571	8.38489	251.775	26.5042	PF00504	PTHR21649			K08916	AT4G10340.1	LHCB5	light harvesting complex of photosystem II 5	Photosynthesis - antenna proteins;Metabolic pathways	GO:0009533 chloroplast stromal thylakoid;GO:0015979 photosynthesis;GO:0016168 chlorophyll binding;GO:0016168 chlorophyll binding;GO:0030076 light-harvesting complex;GO:0009783 photosystem II antenna complex;GO:0009535 chloroplast thylakoid membrane;GO:0009507 chloroplast;GO:0009535 chloroplast thylakoid membrane;GO:0009535 chloroplast thylakoid membrane;GO:0010287 plastoglobule;GO:0010287 plastog…
Pp1s371_45V6	0	127	36.2055		127	1767	4.1788		1767	209	-2.99959		0	4.62992	59.1683	6.19617		PTHR14154				AT3G22840.1	ELIP1	Chlorophyll A-B binding family protein		GO:0016168 chlorophyll binding;GO:0009409 response to cold;GO:0080167 response to karrikin
Pp1s229_21V6	179	14	-3.43581		14	330	4.93937		330	39	-3.00078		5.40067	0.510385	11.0501	1.15622	PF00830					AT2G33450.1		Ribosomal L28 family		GO:0003735 structural constituent of ribosome;GO:0003735 structural constituent of ribosome;GO:0005840 ribosome;GO:0006412 translation;GO:0006412 translation;GO:0016020 membrane;GO:0009507 chloroplast
Pp1s106_68V6	121	25	-2.03435		25	358	4.22036		358	41	-3.04613		3.65074	0.911401	11.9877	1.21552	PF00085	PTHR10438	KOG0910			AT4G03520.1	ATHM2	Thioredoxin superfamily protein		GO:0006979 response to oxidative stress;GO:0008047 enzyme activator activity;GO:0043085 positive regulation of catalytic activity;GO:0009579 thylakoid;GO:0009535 chloroplast thylakoid membrane;GO:0009579 thylakoid;GO:0009507 chloroplast;GO:0009570 chloroplast stroma;GO:0009507 chloroplast;GO:0009570 chloroplast stroma
Pp1s407_2V6	415	14	-4.64896		14	255	4.5674		255	29	-3.05623		12.5211	0.510385	8.53872	0.859755	PF08240,PF00107	PTHR11695	KOG1198			AT1G23740.1		Oxidoreductase, zinc-binding dehydrogenase family protein		GO:0008270 zinc ion binding;GO:0009941 chloroplast envelope;GO:0009507 chloroplast;GO:0009570 chloroplast stroma;GO:0009579 thylakoid;GO:0009409 response to cold;GO:0010319 stromule;GO:0009507 chloroplast;GO:0048046 apoplast;GO:0009570 chloroplast stroma;GO:0035671 ;GO:0035798 ;GO:0055114 oxidation-reduction process
Pp1s272_32V6	1953	102	-4.0184		102	4702	5.90704		4702	520	-3.09655		58.9247	3.71852	157.447	15.4163	PF01597	PTHR11715				AT1G32470.1		Single hybrid motif superfamily protein		GO:0004375 glycine dehydrogenase (decarboxylating) activity;GO:0005960 glycine cleavage complex;GO:0006546 glycine catabolic process;GO:0006546 glycine catabolic process;GO:0019464 glycine decarboxylation via glycine cleavage system;GO:0005739 mitochondrion;GO:0009507 chloroplast;GO:0005739 mitochondrion
Pp1s306_84V6	338	55	-2.37886		55	2672	5.98275		2672	294	-3.10389		10.1979	2.00508	89.4724	8.71614	PF01716				K02716	AT3G50820.1	PSBO2	photosystem II subunit O-2	Photosynthesis;Metabolic pathways	GO:0009654 oxygen evolving complex;GO:0030095 chloroplast photosystem II;GO:0009543 chloroplast thylakoid lumen;GO:0031977 thylakoid lumen;GO:0009543 chloroplast thylakoid lumen;GO:0009579 thylakoid;GO:0010242 oxygen evolving activity;GO:0019684 "photosynthesis, light reaction";GO:0009535 chloroplast thylakoid membrane;GO:0009579 thylakoid;GO:0009507 chloroplast;GO:0009535 chloroplast thylakoid m…
Pp1s1_295V6	241	38	-2.42431		38	168	2.52479		168	18	-3.14225		7.2713	1.38533	5.62551	0.533641		PTHR15020	KOG4039			AT2G34460.1		NAD(P)-binding Rossmann-fold superfamily protein		GO:0003824 catalytic activity;GO:0005488 binding;GO:0008152 metabolic process;GO:0009941 chloroplast envelope;GO:0009941 chloroplast envelope;GO:0009507 chloroplast;GO:0009535 chloroplast thylakoid membrane;GO:0009535 chloroplast thylakoid membrane;GO:0010287 plastoglobule;GO:0010287 plastoglobule;GO:0010287 plastoglobule;GO:0009507 chloroplast
Pp1s20_373V6	483	42	-3.28291		42	585	4.18038		585	62	-3.15796		14.5728	1.53115	19.5888	1.8381	PF00316	PTHR11556	KOG1458	3.1.3.11	K03841	AT3G54050.1	HCEF1	high cyclic electron flow 1	Glycolysis / Gluconeogenesis;Pentose phosphate pathway;Fructose and mannose metabolism;Carbon fixation in photosynthetic organisms;Metabolic pathways;Biosynthesis of secondary metabolites	GO:0006000 fructose metabolic process;GO:0042132 "fructose 1,6-bisphosphate 1-phosphatase activity";GO:0009507 chloroplast;GO:0005985 sucrose metabolic process;GO:0015979 photosynthesis;GO:0030388 "fructose 1,6-bisphosphate metabolic process";GO:0042132 "fructose 1,6-bisphosphate 1-phosphatase activity";GO:0009570 chloroplast stroma;GO:0009409 response to cold;GO:0010319 stromule;GO:0009507 chlor…
Pp1s33_381V6	135	22	-2.37673		22	145	3.10088		145	15	-3.19288		4.07313	0.802033	4.85535	0.444701	PF00909	PTHR11730	KOG0682			AT1G64780.1	AMT1;2	ammonium transporter 1;2		GO:0006810 transport;GO:0008519 ammonium transmembrane transporter activity;GO:0016020 membrane;GO:0009624 response to nematode;GO:0005886 plasma membrane;GO:0015696 ammonium transport;GO:0015843 methylammonium transport
Pp1s148_48V6	1256	142	-2.90422		142	842	2.94833		842	87	-3.1946		37.8952	5.17676	28.1945	2.57926
Pp1s59_328V6	268	33	-2.78104		33	297	3.55033		297	30	-3.22729		8.08593	1.20305	9.9451	0.889402	PF00301	PTHR10909:SF10				AT1G54500.1		Rubredoxin-like superfamily protein		GO:0009055 electron carrier activity;GO:0046872 metal ion binding;GO:0046872 metal ion binding;GO:0009535 chloroplast thylakoid membrane;GO:0009507 chloroplast;GO:0009535 chloroplast thylakoid membrane;GO:0009535 chloroplast thylakoid membrane;GO:0009507 chloroplast
Pp1s40_17V6	1033	79	-3.46819		79	1198	4.30303		1198	112	-3.33892		31.167	2.88003	40.1153	3.32043	PF03951,PF00120	PTHR20852	KOG0683	6.3.1.2	K01915	AT5G35630.2	GS2	glutamine synthetase 2	Alanine, aspartate and glutamate metabolism;Arginine and proline metabolism;Nitrogen metabolism;Metabolic pathways	GO:0004356 glutamate-ammonia ligase activity;GO:0007568 aging;GO:0009507 chloroplast;GO:0009941 chloroplast envelope;GO:0009507 chloroplast;GO:0004356 glutamate-ammonia ligase activity;GO:0005739 mitochondrion;GO:0009507 chloroplast;GO:0009535 chloroplast thylakoid membrane;GO:0009535 chloroplast thylakoid membrane;GO:0005515 protein binding;GO:0022626 cytosolic ribosome;GO:0022626 cytosolic ribo…
Pp1s495_1V6	444	63	-2.57648		63	348	2.84607		348	31	-3.40861		13.3961	2.29673	11.6528	0.919048
Pp1s2_27V6	107	20	-2.17888		20	272	4.14594		272	24	-3.42236		3.22834	0.729121	9.10797	0.711521
Pp1s254_3V6	1626	197	-2.8044		197	18668	6.94663		18668	1630	-3.43749		49.0586	7.18184	625.102	48.3242	PF00504	PTHR21649			K08914	AT5G54270.1	LHCB3	light-harvesting chlorophyll B-binding protein 3	Photosynthesis - antenna proteins;Metabolic pathways	GO:0015979 photosynthesis;GO:0030076 light-harvesting complex;GO:0005198 structural molecule activity;GO:0009535 chloroplast thylakoid membrane;GO:0009507 chloroplast;GO:0009535 chloroplast thylakoid membrane;GO:0009535 chloroplast thylakoid membrane;GO:0009507 chloroplast;GO:0009579 thylakoid;GO:0015979 photosynthesis
Pp1s241_86V6	225	19	-3.3252		19	629	5.42939		629	54	-3.46189		6.78856	0.692665	21.0622	1.60092					K03542	AT1G44575.1	NPQ4	Chlorophyll A-B binding family protein	Photosynthesis;Metabolic pathways	GO:0009517 PSII associated light-harvesting complex II;GO:0010196 nonphotochemical quenching;GO:0016168 chlorophyll binding;GO:0051738 xanthophyll binding;GO:0009535 chloroplast thylakoid membrane;GO:0009535 chloroplast thylakoid membrane;GO:0009507 chloroplast;GO:0009535 chloroplast thylakoid membrane;GO:0009535 chloroplast thylakoid membrane;GO:0009535 chloroplast thylakoid membrane;GO:0010196 …
Pp1s189_18V6	814	167	-2.04453		167	945	2.88087		945	80	-3.4821		24.5595	6.08816	31.6435	2.37174	PF02012					AT5G23120.1	HCF136	photosystem II stability/assembly factor, chloroplast (HCF136)		GO:0030095 chloroplast photosystem II;GO:0009543 chloroplast thylakoid lumen;GO:0009543 chloroplast thylakoid lumen;GO:0031977 thylakoid lumen;GO:0009543 chloroplast thylakoid lumen;GO:0009579 thylakoid;GO:0006461 protein complex assembly;GO:0009535 chloroplast thylakoid membrane;GO:0009579 thylakoid;GO:0009507 chloroplast;GO:0009535 chloroplast thylakoid membrane;GO:0009535 chloroplast thylakoid…
Pp1s201_82V6	1047	2	-8.79139		2	794	9.0134		794	67	-3.48677		31.5894	0.0729121	26.5872	1.98633	PF00162	PTHR11406	KOG1367	2.7.2.3	K00927	AT3G12780.1	PGK1	phosphoglycerate kinase 1	Glycolysis / Gluconeogenesis;Carbon fixation in photosynthetic organisms;Metabolic pathways;Biosynthesis of secondary metabolites	GO:0004618 phosphoglycerate kinase activity;GO:0004618 phosphoglycerate kinase activity;GO:0006096 glycolysis;GO:0009941 chloroplast envelope;GO:0005634 nucleus;GO:0009409 response to cold;GO:0005739 mitochondrion;GO:0009507 chloroplast;GO:0005737 cytoplasm;GO:0009570 chloroplast stroma;GO:0005618 cell wall;GO:0046686 response to cadmium ion;GO:0009579 thylakoid;GO:0009409 response to cold;GO:001…
Pp1s15_26V6	207	9	-4.28291		9	315	5.50969		315	26	-3.51863		6.24547	0.328104	10.5478	0.770815	PF00430					AT4G32260.1		ATPase, F0 complex, subunit B/B\', bacterial/chloroplast	Oxidative phosphorylation;Photosynthesis;Metabolic pathways	GO:0015078 hydrogen ion transmembrane transporter activity;GO:0009941 chloroplast envelope;GO:0009535 chloroplast thylakoid membrane;GO:0009579 thylakoid;GO:0009507 chloroplast;GO:0009535 chloroplast thylakoid membrane;GO:0009535 chloroplast thylakoid membrane;GO:0042742 defense response to bacterium;GO:0016020 membrane;GO:0009507 chloroplast;GO:0009579 thylakoid
Pp1s54_79V6	138	21	-2.47555		21	146	3.17791		146	12	-3.52472		4.16365	0.765577	4.88884	0.355761	PF00270,PF00271,PF08152,PF00098	PTHR10967	KOG0331			AT5G26742.2	emb1138	DEAD box RNA helicase (RH3)		GO:0003676 nucleic acid binding;GO:0003676 nucleic acid binding;GO:0003676 nucleic acid binding;GO:0003723 RNA binding;GO:0003723 RNA binding;GO:0003723 RNA binding;GO:0004386 helicase activity;GO:0004386 helicase activity;GO:0004386 helicase activity;GO:0005524 ATP binding;GO:0005524 ATP binding;GO:0005524 ATP binding;GO:0005524 ATP binding;GO:0008026 ATP-dependent helicase activity;GO:0008026 A…
Pp1s475_27V6	2411	184	-3.4712		184	5079	5.16717		5079	414	-3.5367		72.7432	6.70791	170.071	12.2737	PF00274	PTHR11627	KOG1557	4.1.2.13	K01623	AT2G01140.1		Aldolase superfamily protein	Glycolysis / Gluconeogenesis;Pentose phosphate pathway;Fructose and mannose metabolism;Carbon fixation in photosynthetic organisms;Metabolic pathways;Biosynthesis of secondary metabolites	GO:0006098 pentose-phosphate shunt;GO:0004332 fructose-bisphosphate aldolase activity;GO:0009507 chloroplast;GO:0005739 mitochondrion;GO:0006979 response to oxidative stress;GO:0005739 mitochondrion;GO:0009507 chloroplast;GO:0010287 plastoglobule;GO:0010287 plastoglobule;GO:0010287 plastoglobule;GO:0046686 response to cadmium ion;GO:0005739 mitochondrion;GO:0009507 chloroplast
Pp1s57_155V6	169	8	-4.16022		8	128	4.3804		128	10	-3.59793		5.09896	0.291648	4.2861	0.296467	PF02298					AT2G31050.1		Cupredoxin superfamily protein		GO:0005507 copper ion binding;GO:0005507 copper ion binding;GO:0009055 electron carrier activity;GO:0031225 anchored to membrane;GO:0031225 anchored to membrane
Pp1s40_14V6	149	9	-3.80859		9	430	5.95867		430	33	-3.62366		4.49553	0.328104	14.3986	0.978342	PF00575	PTHR10724			K02945	AT5G30510.1	RPS1	ribosomal protein S1	Ribosome	GO:0003723 RNA binding;GO:0003723 RNA binding;GO:0009507 chloroplast;GO:0009579 thylakoid;GO:0016020 membrane;GO:0009507 chloroplast;GO:0009570 chloroplast stroma
Pp1s628_7V6	442	42	-3.15493		42	1768	5.77599		1768	135	-3.63095		13.3357	1.53115	59.2018	4.00231	PF00504	PTHR21649			K08916	AT4G10340.1	LHCB5	light harvesting complex of photosystem II 5	Photosynthesis - antenna proteins;Metabolic pathways	GO:0009533 chloroplast stromal thylakoid;GO:0015979 photosynthesis;GO:0016168 chlorophyll binding;GO:0016168 chlorophyll binding;GO:0030076 light-harvesting complex;GO:0009783 photosystem II antenna complex;GO:0009535 chloroplast thylakoid membrane;GO:0009507 chloroplast;GO:0009535 chloroplast thylakoid membrane;GO:0009535 chloroplast thylakoid membrane;GO:0010287 plastoglobule;GO:0010287 plastog…
Pp1s152_65V6	106	717	2.99856		717	3546	2.68655		3546	268	-3.64575		3.19816	26.139	118.738	7.94532
Pp1s163_57V6	127	22	-2.2886		22	189	3.48321		189	14	-3.67475		3.83176	0.802033	6.3287	0.415054	PF00939	PTHR10283				AT5G64290.1	DIT2.1	dicarboxylate transport 2.1		GO:0015367 oxoglutarate:malate antiporter activity;GO:0015367 oxoglutarate:malate antiporter activity;GO:0015743 malate transport;GO:0009941 chloroplast envelope;GO:0009941 chloroplast envelope;GO:0009507 chloroplast;GO:0009624 response to nematode;GO:0016020 membrane;GO:0009507 chloroplast
Pp1s10_249V6	18	122	3.00147		122	429	2.1945		429	29	-3.80672		0.543085	4.44764	14.3651	0.859755						AT2G22520.1				GO:0003674 molecular_function;GO:0005575 cellular_component;GO:0008150 biological_process
Pp1s11_253V6	204	30	-2.52488		30	253	3.45651		253	17	-3.81539		6.15496	1.09368	8.47175	0.503994	PF01370	PTHR10366	KOG1371	5.1.3.6	K08679	AT1G02000.1	GAE2	UDP-D-glucuronate 4-epimerase 2	Starch and sucrose metabolism;Amino sugar and nucleotide sugar metabolism;Metabolic pathways	GO:0003824 catalytic activity;GO:0005975 carbohydrate metabolic process;GO:0008152 metabolic process;GO:0009225 nucleotide-sugar metabolic process;GO:0044237 cellular metabolic process;GO:0050378 UDP-glucuronate 4-epimerase activity
Pp1s135_21V6	1048	60	-3.88588		60	2289	5.63401		2289	151	-3.84196		31.6196	2.18736	76.6476	4.47666	PF00044,PF02800	PTHR10836	KOG0657			AT1G12900.1	GAPA-2	glyceraldehyde 3-phosphate dehydrogenase A subunit 2	Carbon fixation in photosynthetic organisms;Metabolic pathways	GO:0006006 glucose metabolic process;GO:0006006 glucose metabolic process;GO:0006006 glucose metabolic process;GO:0006096 glycolysis;GO:0008943 glyceraldehyde-3-phosphate dehydrogenase activity;GO:0008943 glyceraldehyde-3-phosphate dehydrogenase activity;GO:0008943 glyceraldehyde-3-phosphate dehydrogenase activity;GO:0008943 glyceraldehyde-3-phosphate dehydrogenase activity;GO:0051287 NAD or NADH…
Pp1s61_236V6	181	15	-3.3523		15	205	4.15299		205	13	-3.8989		5.46102	0.546841	6.86446	0.385407	PF00333,PF03719	PTHR13718	KOG0877		K02988	AT2G33800.1		Ribosomal protein S5 family protein	Ribosome	GO:0003723 RNA binding;GO:0003735 structural constituent of ribosome;GO:0003735 structural constituent of ribosome;GO:0005622 intracellular;GO:0005840 ribosome;GO:0006412 translation;GO:0009579 thylakoid;GO:0005634 nucleus;GO:0009409 response to cold;GO:0009535 chloroplast thylakoid membrane;GO:0009507 chloroplast;GO:0009570 chloroplast stroma;GO:0046686 response to cadmium ion;GO:0016020 membran…
Pp1s9_211V6	122	21	-2.29776		21	239	3.88895		239	15	-3.91384		3.68091	0.765577	8.00296	0.444701	PF07690,PF00854	PTHR11654	KOG1237			AT2G02020.1		Major facilitator superfamily protein		GO:0005215 transporter activity;GO:0005215 transporter activity;GO:0006857 oligopeptide transport;GO:0006857 oligopeptide transport;GO:0006857 oligopeptide transport;GO:0016020 membrane;GO:0016020 membrane;GO:0016020 membrane
Pp1s258_44V6	3022	360	-2.82878		360	1186	2.10044		1186	74	-3.9223		91.1779	13.1242	39.7134	2.19386	PF00004		KOG0651			AT2G39730.1	RCA	rubisco activase		GO:0009507 chloroplast;GO:0030234 enzyme regulator activity;GO:0009941 chloroplast envelope;GO:0009941 chloroplast envelope;GO:0009941 chloroplast envelope;GO:0009941 chloroplast envelope;GO:0009941 chloroplast envelope;GO:0009941 chloroplast envelope;GO:0005634 nucleus;GO:0005634 nucleus;GO:0005634 nucleus;GO:0009535 chloroplast thylakoid membrane;GO:0009535 chloroplast thylakoid membrane;GO:000…
Pp1s182_93V6	46	524	3.75052		524	1797	2.15835		1797	112	-3.92388		1.38788	19.103	60.1729	3.32043	PF00903					AT5G48480.1		Lactoylglutathione lyase / glyoxalase I family protein		GO:0003674 molecular_function;GO:0008150 biological_process;GO:0005829 cytosol
Pp1s182_81V6	968	99	-3.04885		99	4580	5.91218		4580	281	-3.94657		29.2059	3.60915	153.362	8.33073	PF00504	PTHR21649			K08912	AT2G05100.1	LHCB2.1	photosystem II light harvesting complex gene 2.1	Photosynthesis - antenna proteins;Metabolic pathways	GO:0015979 photosynthesis;GO:0016168 chlorophyll binding;GO:0030076 light-harvesting complex;GO:0009941 chloroplast envelope;GO:0009535 chloroplast thylakoid membrane;GO:0009507 chloroplast;GO:0009535 chloroplast thylakoid membrane;GO:0009535 chloroplast thylakoid membrane;GO:0010287 plastoglobule;GO:0016020 membrane;GO:0009507 chloroplast;GO:0009579 thylakoid;GO:0009637 response to blue light;GO…
Pp1s179_68V6	793	86	-2.96426		86	530	3.00399		530	32	-3.96971		23.9259	3.13522	17.7471	0.948695	PF00657					AT4G01130.1		GDSL-like Lipase/Acylhydrolase superfamily protein		GO:0004091 carboxylesterase activity;GO:0006629 lipid metabolic process;GO:0012505 endomembrane system;GO:0016788 "hydrolase activity, acting on ester bonds"
Pp1s123_43V6	166	33	-2.08999		33	255	3.33036		255	15	-4.00733		5.00845	1.20305	8.53872	0.444701	PF11623					AT4G23890.1				GO:0003674 molecular_function;GO:0008150 biological_process;GO:0009507 chloroplast;GO:0009535 chloroplast thylakoid membrane;GO:0009535 chloroplast thylakoid membrane;GO:0009507 chloroplast
Pp1s116_110V6	2110	141	-3.66282		141	10491	6.59772		10491	610	-4.02406		63.6616	5.1403	351.293	18.0845	PF06596					AT2G06520.1	PSBX	photosystem II subunit X		GO:0003674 molecular_function;GO:0015979 photosynthesis;GO:0009535 chloroplast thylakoid membrane
Pp1s135_29V6	697	18	-5.03443		18	899	6.02265		899	50	-4.08818		21.0294	0.656209	30.1032	1.48234	PF00044,PF02800	PTHR10836	KOG0657	1.2.1.13	K05298	AT1G12900.1	GAPA-2	glyceraldehyde 3-phosphate dehydrogenase A subunit 2	Carbon fixation in photosynthetic organisms;Metabolic pathways	GO:0006006 glucose metabolic process;GO:0006006 glucose metabolic process;GO:0006006 glucose metabolic process;GO:0006096 glycolysis;GO:0008943 glyceraldehyde-3-phosphate dehydrogenase activity;GO:0008943 glyceraldehyde-3-phosphate dehydrogenase activity;GO:0008943 glyceraldehyde-3-phosphate dehydrogenase activity;GO:0008943 glyceraldehyde-3-phosphate dehydrogenase activity;GO:0051287 NAD or NADH…
Pp1s241_33V6	949	50	-4.00575		50	2783	6.17897		2783	146	-4.17246		28.6326	1.8228	93.1893	4.32842	PF03951	PTHR20852				AT1G66200.3	GSR2	glutamine synthase clone F11		GO:0004356 glutamate-ammonia ligase activity;GO:0005829 cytosol;GO:0009941 chloroplast envelope;GO:0004356 glutamate-ammonia ligase activity;GO:0005773 vacuole;GO:0005773 vacuole;GO:0022626 cytosolic ribosome;GO:0022626 cytosolic ribosome;GO:0042128 nitrate assimilation;GO:0005507 copper ion binding;GO:0005507 copper ion binding;GO:0009651 response to salt stress;GO:0009651 response to salt stres…
Pp1s10_228V6	215	14	-3.70018		14	672	5.96536		672	35	-4.1829		6.48684	0.510385	22.502	1.03764	PF00171	PTHR11699	KOG2450	1.2.1.9	K00131	AT2G24270.2	ALDH11A3	aldehyde dehydrogenase 11A3	Glycolysis / Gluconeogenesis;Metabolic pathways	GO:0004028 3-chloroallyl aldehyde dehydrogenase activity;GO:0008152 metabolic process;GO:0008152 metabolic process;GO:0008152 metabolic process;GO:0008152 metabolic process;GO:0055114 oxidation-reduction process;GO:0055114 oxidation-reduction process;GO:0055114 oxidation-reduction process;GO:0055114 oxidation-reduction process;GO:0005515 protein binding;GO:0008886 glyceraldehyde-3-phosphate dehyd…
Pp1s121_25V6	263	43	-2.372		43	157	2.24876		157	8	-4.21448		7.93507	1.56761	5.25717	0.237174	PF00264,PF12142,PF12143	PTHR11474
Pp1s41_264V6	720	12	-5.66623		12	743	6.33266		743	36	-4.28716		21.7234	0.437472	24.8795	1.06728	PF04725				K03541	AT1G79040.1	PSBR	photosystem II subunit R	Photosynthesis;Metabolic pathways	GO:0003674 molecular_function;GO:0009523 photosystem II;GO:0015979 photosynthesis;GO:0009535 chloroplast thylakoid membrane;GO:0009507 chloroplast;GO:0009535 chloroplast thylakoid membrane;GO:0009535 chloroplast thylakoid membrane;GO:0010270 photosystem II oxygen evolving complex assembly;GO:0009507 chloroplast;GO:0009579 thylakoid
Pp1s86_156V6	723	22	-4.79776		22	2117	6.96878		2117	91	-4.45987		21.8139	0.802033	70.8881	2.69785	PF00044,PF02800	PTHR10836	KOG0657			AT1G42970.1	GAPB	glyceraldehyde-3-phosphate dehydrogenase B subunit	Carbon fixation in photosynthetic organisms;Metabolic pathways	GO:0006096 glycolysis;GO:0008943 glyceraldehyde-3-phosphate dehydrogenase activity;GO:0009941 chloroplast envelope;GO:0009941 chloroplast envelope;GO:0009507 chloroplast;GO:0047100 glyceraldehyde-3-phosphate dehydrogenase (NADP+) (phosphorylating) activity;GO:0009507 chloroplast;GO:0009535 chloroplast thylakoid membrane;GO:0009535 chloroplast thylakoid membrane;GO:0009416 response to light stimul…
Pp1s43_118V6	541	2118	2.20966		2118	6589	2.01776		6589	283	-4.46105		16.3227	77.2139	220.634	8.39002	PF00484	PTHR11002	KOG1578	4.2.1.1	K01673	AT5G14740.1	CA2	carbonic anhydrase 2	Nitrogen metabolism	GO:0004089 carbonate dehydratase activity;GO:0004089 carbonate dehydratase activity;GO:0004089 carbonate dehydratase activity;GO:0004089 carbonate dehydratase activity;GO:0004089 carbonate dehydratase activity;GO:0004089 carbonate dehydratase activity;GO:0008270 zinc ion binding;GO:0008270 zinc ion binding;GO:0008270 zinc ion binding;GO:0008270 zinc ion binding;GO:0008270 zinc ion binding;GO:0008…
Pp1s27_232V6	301	50	-2.34911		50	1018	4.72807		1018	43	-4.48512		9.08158	1.8228	34.0879	1.27481
Pp1s107_188V6	240	13	-3.9658		13	493	5.62541		493	20	-4.54338		7.24113	0.473928	16.5082	0.592934	PF02531				K02692	AT1G03130.1	PSAD-2	photosystem I subunit D-2	Photosynthesis;Metabolic pathways	GO:0003674 molecular_function;GO:0009538 photosystem I reaction center;GO:0015979 photosynthesis;GO:0015979 photosynthesis;GO:0009579 thylakoid;GO:0009941 chloroplast envelope;GO:0009535 chloroplast thylakoid membrane;GO:0009507 chloroplast;GO:0009535 chloroplast thylakoid membrane;GO:0009535 chloroplast thylakoid membrane;GO:0016020 membrane;GO:0009579 thylakoid
Pp1s236_72V6	762	19	-5.08506		19	579	5.30989		579	23	-4.57372		22.9906	0.692665	19.3879	0.681875	PF01095					AT5G19730.1		Pectin lyase-like superfamily protein	Pentose and glucuronate interconversions;Starch and sucrose metabolism;Metabolic pathways	GO:0009505 plant-type cell wall;GO:0030599 pectinesterase activity;GO:0030599 pectinesterase activity;GO:0042545 cell wall modification;GO:0005618 cell wall;GO:0005737 cytoplasm
Pp1s15_215V6	174	33	-2.15789		33	494	4.28438		494	16	-4.86823		5.24982	1.20305	16.5417	0.474348
Pp1s3_343V6	140	15	-2.98174		15	192	4.05847		192	5	-5.1829		4.22399	0.546841	6.42916	0.148234	PF00348	PTHR12001	KOG0776	2.5.1.1,2.5.1.10,2.5.1.29	K13789	AT4G36810.1	GGPS1	geranylgeranyl pyrophosphate synthase 1	Terpenoid backbone biosynthesis;Metabolic pathways;Biosynthesis of secondary metabolites	GO:0004311 farnesyltranstransferase activity;GO:0004311 farnesyltranstransferase activity;GO:0008299 isoprenoid biosynthetic process;GO:0009507 chloroplast;GO:0009513 etioplast;GO:0009507 chloroplast
Pp1s41_267V6	1457	103	-3.58163		103	5604	6.14614		5604	96	-5.78714		43.9597	3.75497	187.651	2.84609	PF02605				K02699	AT4G12800.1	PSAL	photosystem I subunit l	Photosynthesis;Metabolic pathways	GO:0003674 molecular_function;GO:0009538 photosystem I reaction center;GO:0015979 photosynthesis;GO:0019684 "photosynthesis, light reaction";GO:0009941 chloroplast envelope;GO:0009535 chloroplast thylakoid membrane;GO:0009507 chloroplast;GO:0009535 chloroplast thylakoid membrane;GO:0009535 chloroplast thylakoid membrane;GO:0010287 plastoglobule;GO:0016020 membrane;GO:0009507 chloroplast;GO:000957…
Pp1s83_246V6	1472	224	-2.47555		224	6857	5.31641		6857	79	-6.35944		44.4122	8.16615	229.608	2.34209	PF01241				K08905	AT1G55670.1	PSAG	photosystem I subunit G	Photosynthesis;Metabolic pathways	GO:0003674 molecular_function;GO:0009522 photosystem I;GO:0015979 photosynthesis;GO:0016020 membrane;GO:0009773 photosynthetic electron transport in photosystem I;GO:0015979 photosynthesis;GO:0050821 protein stabilization;GO:0009941 chloroplast envelope;GO:0009941 chloroplast envelope;GO:0009535 chloroplast thylakoid membrane;GO:0009507 chloroplast;GO:0009535 chloroplast thylakoid membrane;GO:000…
Pp1s433_15V6	520	2	-7.78171		2	180	6.87226		180	2	-6.41172		15.6891	0.0729121	6.02733	0.0592934	PF00141					AT2G37130.1		Peroxidase superfamily protein	Phenylalanine metabolism;Phenylpropanoid biosynthesis;Metabolic pathways;Biosynthesis of secondary metabolites	GO:0004601 peroxidase activity;GO:0004601 peroxidase activity;GO:0004601 peroxidase activity;GO:0020037 heme binding;GO:0020037 heme binding;GO:0050832 defense response to fungus;GO:0005515 protein binding;GO:0005829 cytosol;GO:0005829 cytosol
Pp1s34_237V6	293	15	-4.04721		15	722	5.96937		722	5	-7.09379		8.84021	0.546841	24.1763	0.148234	PF00702	PTHR19288	KOG2882			AT5G36700.2	PGLP1	2-phosphoglycolate phosphatase 1		GO:0008152 metabolic process;GO:0008152 metabolic process;GO:0008152 metabolic process;GO:0008152 metabolic process;GO:0008967 phosphoglycolate phosphatase activity;GO:0009507 chloroplast;GO:0009570 chloroplast stroma;GO:0008967 phosphoglycolate phosphatase activity;GO:0009507 chloroplast;GO:0009507 chloroplast;GO:0009507 chloroplast;GO:0009570 chloroplast stroma;GO:0005829 cytosol;GO:0005829 cyt…
Pp1s57_133V6	171	3	-5.59223		3	337	7.19204		337	2	-7.31647		5.1593	0.109368	11.2845	0.0592934	PF08263,PF00560	PTHR23258				AT5G63930.1		Leucine-rich repeat protein kinase family protein		GO:0004672 protein kinase activity;GO:0004674 protein serine/threonine kinase activity;GO:0004674 protein serine/threonine kinase activity;GO:0005524 ATP binding;GO:0005524 ATP binding;GO:0006468 protein phosphorylation;GO:0006468 protein phosphorylation;GO:0007169 transmembrane receptor protein tyrosine kinase signaling pathway;GO:0005886 plasma membrane
Pp1s1_461V6	514	29	-3.90699		29	3706	7.37807		3706	20	-7.45358		15.5081	1.05723	124.096	0.592934	PF05757					AT4G21280.1	PSBQA	photosystem II subunit QA	Photosynthesis;Metabolic pathways	GO:0005509 calcium ion binding;GO:0005509 calcium ion binding;GO:0009654 oxygen evolving complex;GO:0030095 chloroplast photosystem II;GO:0009543 chloroplast thylakoid lumen;GO:0031977 thylakoid lumen;GO:0009543 chloroplast thylakoid lumen;GO:0009579 thylakoid;GO:0009535 chloroplast thylakoid membrane;GO:0009579 thylakoid;GO:0009507 chloroplast;GO:0009535 chloroplast thylakoid membrane;GO:0009535…
Pp1s545_4V6	258	21	-3.37825		21	384	4.57305		384	2	-7.50483		7.78421	0.765577	12.8583	0.0592934	PF00101			4.1.1.39	K01602	AT5G38410.1		Ribulose bisphosphate carboxylase (small chain) family protein	Glyoxylate and dicarboxylate metabolism;Carbon fixation in photosynthetic organisms;Metabolic pathways	GO:0009573 chloroplast ribulose bisphosphate carboxylase complex;GO:0015977 carbon fixation;GO:0016984 ribulose-bisphosphate carboxylase activity;GO:0016984 ribulose-bisphosphate carboxylase activity;GO:0016984 ribulose-bisphosphate carboxylase activity;GO:0016984 ribulose-bisphosphate carboxylase activity;GO:0005515 protein binding;GO:0009507 chloroplast;GO:0005618 cell wall;GO:0005618 cell wall…
Pp1s352_14V6	221	23	-3.02369		23	1934	6.77421		1934	9	-7.66731		6.66787	0.838489	64.7604	0.266821	PF00101			4.1.1.39	K01602	AT5G38410.1		Ribulose bisphosphate carboxylase (small chain) family protein	Glyoxylate and dicarboxylate metabolism;Carbon fixation in photosynthetic organisms;Metabolic pathways	GO:0009573 chloroplast ribulose bisphosphate carboxylase complex;GO:0015977 carbon fixation;GO:0016984 ribulose-bisphosphate carboxylase activity;GO:0016984 ribulose-bisphosphate carboxylase activity;GO:0016984 ribulose-bisphosphate carboxylase activity;GO:0016984 ribulose-bisphosphate carboxylase activity;GO:0005515 protein binding;GO:0009507 chloroplast;GO:0005618 cell wall;GO:0005618 cell wall…
Pp1s24_126V6	448	53	-2.83878		53	894	4.45661		894	4	-7.72399		13.5168	1.93217	29.9358	0.118587	PF00467	PTHR12903				AT5G54600.1		Translation protein SH3-like family protein		GO:0003735 structural constituent of ribosome;GO:0003735 structural constituent of ribosome;GO:0003735 structural constituent of ribosome;GO:0006412 translation;GO:0006412 translation;GO:0006412 translation;GO:0015934 large ribosomal subunit;GO:0009507 chloroplast;GO:0009507 chloroplast;GO:0009570 chloroplast stroma
Pp1s66_48V6	141	0	-36.1157		0	1496	39.9309		1496	2	-9.46676		4.25416	0	50.0938	0.0592934	PF00101			4.1.1.39	K01602	AT1G67090.1	RBCS1A	ribulose bisphosphate carboxylase small chain 1A	Glyoxylate and dicarboxylate metabolism;Carbon fixation in photosynthetic organisms;Metabolic pathways	GO:0009573 chloroplast ribulose bisphosphate carboxylase complex;GO:0015977 carbon fixation;GO:0016984 ribulose-bisphosphate carboxylase activity;GO:0031977 thylakoid lumen;GO:0009579 thylakoid;GO:0009579 thylakoid;GO:0009941 chloroplast envelope;GO:0009941 chloroplast envelope;GO:0009409 response to cold;GO:0009507 chloroplast;GO:0009535 chloroplast thylakoid membrane;GO:0009535 chloroplast thyl…
Pp1s570_2V6	139	17	-2.79082		17	105	3.00718		105	0	-35.6265		4.19382	0.619753	3.51594	0	PF00657	PTHR22835:SF27				AT4G01130.1		GDSL-like Lipase/Acylhydrolase superfamily protein		GO:0004091 carboxylesterase activity;GO:0006629 lipid metabolic process;GO:0012505 endomembrane system;GO:0016788 "hydrolase activity, acting on ester bonds"
Pp1s171_48V6	167	19	-2.89512		19	130	3.15484		130	0	-35.9347		5.03862	0.692665	4.35307	0
Pp1s146_120V6	131	8	-3.79277		8	183	4.8961		183	0	-36.428		3.95245	0.291648	6.12779	0	PF00111					AT1G60950.1	FED A	2Fe-2S ferredoxin-like superfamily protein	Photosynthesis	GO:0009055 electron carrier activity;GO:0051536 iron-sulfur cluster binding;GO:0051537 "2 iron, 2 sulfur cluster binding";GO:0005515 protein binding;GO:0009507 chloroplast;GO:0009767 photosynthetic electron transport chain;GO:0009416 response to light stimulus;GO:0009570 chloroplast stroma;GO:0009767 photosynthetic electron transport chain
Pp1s102_49V6	153	22	-2.5573		22	408	4.5934		408	0	-37.5847		4.61622	0.802033	13.662	0	PF00282	PTHR11999	KOG0628	4.1.1.25	K01592	AT2G20340.1		Pyridoxal phosphate (PLP)-dependent transferases superfamily protein	Tyrosine metabolism;Isoquinoline alkaloid biosynthesis;Metabolic pathways;Biosynthesis of secondary metabolites	GO:0003824 catalytic activity;GO:0004837 tyrosine decarboxylase activity;GO:0005575 cellular_component;GO:0006520 cellular amino acid metabolic process;GO:0016831 carboxy-lyase activity;GO:0030170 pyridoxal phosphate binding;GO:0009611 response to wounding
Pp1s25_66V6	223	5	-5.23832		5	469	6.93192						6.72821	0.18228	15.7046	7.17451	PF01716				K02716	AT3G50820.1	PSBO2	photosystem II subunit O-2	Photosynthesis;Metabolic pathways	GO:0009654 oxygen evolving complex;GO:0030095 chloroplast photosystem II;GO:0009543 chloroplast thylakoid lumen;GO:0031977 thylakoid lumen;GO:0009543 chloroplast thylakoid lumen;GO:0009579 thylakoid;GO:0010242 oxygen evolving activity;GO:0019684 "photosynthesis, light reaction";GO:0009535 chloroplast thylakoid membrane;GO:0009579 thylakoid;GO:0009507 chloroplast;GO:0009535 chloroplast thylakoid m…
Pp1s227_44V6	165	24	-2.5407		24	2175	6.88224						4.97828	0.874945	72.8303	22.4722	PF02298					AT2G32300.1	UCC1	uclacyanin 1		GO:0005507 copper ion binding;GO:0005507 copper ion binding;GO:0009055 electron carrier activity;GO:0031225 anchored to membrane;GO:0031225 anchored to membrane
Pp1s259_76V6	1549	114	-3.52358		114	9486	6.7591						46.7354	4.15599	317.64	87.9618						AT1G51400.1		Photosystem II 5 kD protein		GO:0003674 molecular_function;GO:0030095 chloroplast photosystem II;GO:0009543 chloroplast thylakoid lumen;GO:0009611 response to wounding;GO:0010193 response to ozone;GO:0010224 response to UV-B;GO:0009535 chloroplast thylakoid membrane
Pp1s6_312V6	1966	171	-3.28254		171	13603	6.69419						59.3169	6.23398	455.499	123.716	PF00504	PTHR21649				AT4G10340.1	LHCB5	light harvesting complex of photosystem II 5	Photosynthesis - antenna proteins;Metabolic pathways	GO:0009533 chloroplast stromal thylakoid;GO:0015979 photosynthesis;GO:0016168 chlorophyll binding;GO:0016168 chlorophyll binding;GO:0030076 light-harvesting complex;GO:0009783 photosystem II antenna complex;GO:0009535 chloroplast thylakoid membrane;GO:0009507 chloroplast;GO:0009535 chloroplast thylakoid membrane;GO:0009535 chloroplast thylakoid membrane;GO:0010287 plastoglobule;GO:0010287 plastog…
Pp1s31_66V6	232	10	-4.2954		10	786	6.67686						6.99976	0.36456	26.3194	19.5668	PF06596					AT2G06520.1	PSBX	photosystem II subunit X		GO:0003674 molecular_function;GO:0015979 photosynthesis;GO:0009535 chloroplast thylakoid membrane
Pp1s252_5V6	495	61	-2.77989		61	2617	5.80336						14.9348	2.22382	87.6307	162.405	PF03018	PTHR21495				AT1G22900.1		Disease resistance-responsive (dirigent-like protein) family protein		GO:0003674 molecular_function;GO:0006952 defense response;GO:0012505 endomembrane system
Pp1s11_39V6	106	18	-2.31734		18	754	5.7689						3.19816	0.656209	25.2478	14.8234	PF01789					AT1G06680.1	PSBP-1	photosystem II subunit P-1	Photosynthesis;Metabolic pathways	GO:0009543 chloroplast thylakoid lumen;GO:0009654 oxygen evolving complex;GO:0030095 chloroplast photosystem II;GO:0009534 chloroplast thylakoid;GO:0019898 extrinsic to membrane;GO:0031977 thylakoid lumen;GO:0009543 chloroplast thylakoid lumen;GO:0009579 thylakoid;GO:0009941 chloroplast envelope;GO:0009535 chloroplast thylakoid membrane;GO:0009579 thylakoid;GO:0009507 chloroplast;GO:0009535 chlor…
Pp1s75_141V6	151	19	-2.74982		19	793	5.76365						4.55588	0.692665	26.5538	7.14486	PF01789				K02717	AT1G06680.1	PSBP-1	photosystem II subunit P-1	Photosynthesis;Metabolic pathways	GO:0009543 chloroplast thylakoid lumen;GO:0009654 oxygen evolving complex;GO:0030095 chloroplast photosystem II;GO:0009534 chloroplast thylakoid;GO:0019898 extrinsic to membrane;GO:0031977 thylakoid lumen;GO:0009543 chloroplast thylakoid lumen;GO:0009579 thylakoid;GO:0009941 chloroplast envelope;GO:0009535 chloroplast thylakoid membrane;GO:0009579 thylakoid;GO:0009507 chloroplast;GO:0009535 chlor…
Pp1s91_92V6	654	43	-3.68623		43	1566	5.56701						19.7321	1.56761	52.4378	25.4369	PF01571,PF08669	PTHR13847	KOG2770			AT1G11860.2		Glycine cleavage T-protein family	Glycine, serine and threonine metabolism;One carbon pool by folate;Nitrogen metabolism;Metabolic pathways	GO:0004047 aminomethyltransferase activity;GO:0004047 aminomethyltransferase activity;GO:0004047 aminomethyltransferase activity;GO:0004047 aminomethyltransferase activity;GO:0009941 chloroplast envelope;GO:0009941 chloroplast envelope;GO:0022626 cytosolic ribosome;GO:0022626 cytosolic ribosome;GO:0046686 response to cadmium ion;GO:0046686 response to cadmium ion;GO:0016020 membrane;GO:0016020 me…
Pp1s94_94V6	618	24	-4.44584		24	860	5.54363						18.6459	0.874945	28.7973	9.39801	PF01946	PTHR23023	KOG2960		K03146	AT5G54770.1	THI1	thiazole biosynthetic enzyme, chloroplast (ARA6) (THI1) (THI4)		GO:0018131 oxazole or thiazole biosynthetic process;GO:0005739 mitochondrion;GO:0009507 chloroplast;GO:0009507 chloroplast;GO:0009941 chloroplast envelope;GO:0009570 chloroplast stroma;GO:0009579 thylakoid;GO:0042803 protein homodimerization activity;GO:0009409 response to cold;GO:0010319 stromule;GO:0009507 chloroplast;GO:0009570 chloroplast stroma;GO:0008270 zinc ion binding;GO:0009228 thiamine…
Pp1s429_29V6	719	6	-6.66423		6	157	5.09006						21.6932	0.218736	5.25717	2.34209	PF00316	PTHR11556	KOG1458	3.1.3.37	K01100	AT3G55800.1	SBPASE	sedoheptulose-bisphosphatase	Carbon fixation in photosynthetic organisms;Metabolic pathways	GO:0005975 carbohydrate metabolic process;GO:0042578 phosphoric ester hydrolase activity;GO:0005515 protein binding;GO:0009941 chloroplast envelope;GO:0009507 chloroplast;GO:0005515 protein binding;GO:0005986 sucrose biosynthetic process;GO:0016051 carbohydrate biosynthetic process;GO:0019252 starch biosynthetic process;GO:0050278 sedoheptulose-bisphosphatase activity;GO:0009570 chloroplast strom…
Pp1s80_23V6	1496	75	-4.07742		75	1901	5.04413						45.1364	2.7342	63.6553	13.8747	PF02507					AT1G31330.1	PSAF	photosystem I subunit F	Photosynthesis;Metabolic pathways	GO:0003674 molecular_function;GO:0009538 photosystem I reaction center;GO:0015979 photosynthesis;GO:0015979 photosynthesis;GO:0009941 chloroplast envelope;GO:0009535 chloroplast thylakoid membrane;GO:0009507 chloroplast;GO:0009535 chloroplast thylakoid membrane;GO:0009535 chloroplast thylakoid membrane;GO:0010287 plastoglobule;GO:0010287 plastoglobule;GO:0016020 membrane;GO:0009507 chloroplast;GO…
Pp1s144_59V6	129	12	-3.18561		12	294	4.99511						3.89211	0.437472	9.84465	6.04793	PF00067	PTHR19383	KOG0156			AT5G07990.1	TT7	Cytochrome P450 superfamily protein	Flavonoid biosynthesis;Flavone and flavonol biosynthesis;Metabolic pathways;Biosynthesis of secondary metabolites	GO:0016711 flavonoid 3'-monooxygenase activity;GO:0019825 oxygen binding;GO:0009411 response to UV;GO:0009813 flavonoid biosynthetic process;GO:0016711 flavonoid 3'-monooxygenase activity;GO:0009733 response to auxin stimulus
Pp1s74_135V6	593	34	-3.88377		34	614	4.55503						17.8916	1.23951	20.5599	6.40369	PF01241					AT1G30380.1	PSAK	photosystem I subunit K	Photosynthesis;Metabolic pathways	GO:0003674 molecular_function;GO:0009522 photosystem I;GO:0015979 photosynthesis;GO:0015979 photosynthesis;GO:0016020 membrane;GO:0009535 chloroplast thylakoid membrane;GO:0009535 chloroplast thylakoid membrane;GO:0009535 chloroplast thylakoid membrane;GO:0009507 chloroplast;GO:0009579 thylakoid
Pp1s137_232V6	274	54	-2.10249		54	970	4.54736						8.26695	1.96863	32.4806	11.3547	PF00244	PTHR18860	KOG0841			AT3G02520.1	GRF7	general regulatory factor 7		GO:0005635 nuclear envelope;GO:0005737 cytoplasm;GO:0005886 plasma membrane;GO:0005515 protein binding;GO:0045309 protein phosphorylated amino acid binding;GO:0009507 chloroplast;GO:0005886 plasma membrane;GO:0005886 plasma membrane;GO:0005829 cytosol;GO:0009570 chloroplast stroma
Pp1s363_23V6	492	41	-3.34431		41	710	4.49453						14.8443	1.4947	23.7745	7.61921						AT4G02530.1		chloroplast thylakoid lumen protein		GO:0003674 molecular_function;GO:0008150 biological_process;GO:0009543 chloroplast thylakoid lumen;GO:0031977 thylakoid lumen;GO:0009543 chloroplast thylakoid lumen;GO:0009579 thylakoid;GO:0009535 chloroplast thylakoid membrane;GO:0009579 thylakoid;GO:0009507 chloroplast;GO:0009535 chloroplast thylakoid membrane;GO:0009535 chloroplast thylakoid membrane;GO:0009570 chloroplast stroma;GO:0009579 th…
Pp1s66_287V6	187	21	-2.91392		21	362	4.48793						5.64205	0.765577	12.1216	4.98065				6.6.1.1	K03404	AT1G08520.1	ALB1	ALBINA 1	Porphyrin and chlorophyll metabolism;Metabolic pathways;Biosynthesis of secondary metabolites	GO:0000166 nucleotide binding;GO:0005524 ATP binding;GO:0016851 magnesium chelatase activity;GO:0017111 nucleoside-triphosphatase activity;GO:0010007 magnesium chelatase complex;GO:0009507 chloroplast;GO:0015995 chlorophyll biosynthetic process
Pp1s36_214V6	171	17	-3.08973		17	290	4.47285						5.1593	0.619753	9.7107	5.51429	PF00535	PTHR10859:SF19		2.4.1.32	K13680	AT5G03760.1	ATCSLA09	Nucleotide-diphospho-sugar transferases superfamily protein		GO:0016757 "transferase activity, transferring glycosyl groups";GO:0016757 "transferase activity, transferring glycosyl groups";GO:0009294 DNA mediated transformation;GO:0009617 response to bacterium;GO:0051753 mannan synthase activity
Pp1s161_32V6	714	78	-2.95372		78	1305	4.44483						21.5424	2.84357	43.6982	9.78342	PF00504	PTHR21649			K08907	AT3G54890.4	LHCA1	photosystem I light harvesting complex gene 1	Photosynthesis - antenna proteins	GO:0015979 photosynthesis;GO:0016168 chlorophyll binding;GO:0030076 light-harvesting complex;GO:0009941 chloroplast envelope;GO:0009941 chloroplast envelope;GO:0009941 chloroplast envelope;GO:0009535 chloroplast thylakoid membrane;GO:0009535 chloroplast thylakoid membrane;GO:0009535 chloroplast thylakoid membrane;GO:0009507 chloroplast;GO:0009507 chloroplast;GO:0009507 chloroplast;GO:0009535 chlo…
Pp1s536_9V6	149	12	-3.39355		12	193	4.3879						4.49553	0.437472	6.46264	3.43902	PF01281	PTHR21368				AT3G44890.1	RPL9	ribosomal protein L9	Ribosome	GO:0003735 structural constituent of ribosome;GO:0005840 ribosome;GO:0006412 translation;GO:0042254 ribosome biogenesis;GO:0009507 chloroplast;GO:0000311 plastid large ribosomal subunit;GO:0003735 structural constituent of ribosome;GO:0006412 translation;GO:0009570 chloroplast stroma;GO:0009507 chloroplast
Pp1s158_109V6	360	25	-3.60734		25	402	4.3876						10.8617	0.911401	13.461	14.0822	PF00504	PTHR21649				AT3G54890.1	LHCA1	photosystem I light harvesting complex gene 1	Photosynthesis - antenna proteins	GO:0015979 photosynthesis;GO:0016168 chlorophyll binding;GO:0030076 light-harvesting complex;GO:0009941 chloroplast envelope;GO:0009941 chloroplast envelope;GO:0009941 chloroplast envelope;GO:0009535 chloroplast thylakoid membrane;GO:0009535 chloroplast thylakoid membrane;GO:0009535 chloroplast thylakoid membrane;GO:0009507 chloroplast;GO:0009507 chloroplast;GO:0009507 chloroplast;GO:0009535 chlo…
Pp1s351_30V6	257	23	-3.24141		23	369	4.38432						7.75404	0.838489	12.356	3.97266	PF00364,PF02817,PF00198	PTHR23151	KOG0557	2.3.1.12	K00627	AT3G25860.1	LTA2	2-oxoacid dehydrogenases acyltransferase family protein		GO:0004742 dihydrolipoyllysine-residue acetyltransferase activity;GO:0008152 metabolic process;GO:0004742 dihydrolipoyllysine-residue acetyltransferase activity;GO:0006086 acetyl-CoA biosynthetic process from pyruvate;GO:0009570 chloroplast stroma;GO:0009941 chloroplast envelope;GO:0009507 chloroplast;GO:0022626 cytosolic ribosome;GO:0016020 membrane;GO:0009507 chloroplast;GO:0005829 cytosol
Pp1s101_2V6	996	134	-2.65326		134	2127	4.36892						30.0507	4.88511	71.223	25.8519	PF02427				K02693	AT2G20260.1	PSAE-2	photosystem I subunit E-2	Photosynthesis;Metabolic pathways	GO:0003824 catalytic activity;GO:0009538 photosystem I reaction center;GO:0015979 photosynthesis;GO:0009535 chloroplast thylakoid membrane;GO:0009507 chloroplast;GO:0009535 chloroplast thylakoid membrane;GO:0009535 chloroplast thylakoid membrane;GO:0010287 plastoglobule;GO:0009507 chloroplast;GO:0009579 thylakoid
Pp1s4_490V6	123	19	-2.45393		19	295	4.33705						3.71108	0.692665	9.87813	2.16421	PF00160	PTHR11071	KOG0880			AT1G74070.1		Cyclophilin-like peptidyl-prolyl cis-trans isomerase family protein		GO:0003755 peptidyl-prolyl cis-trans isomerase activity;GO:0003755 peptidyl-prolyl cis-trans isomerase activity;GO:0006457 protein folding;GO:0006457 protein folding;GO:0009543 chloroplast thylakoid lumen;GO:0009507 chloroplast;GO:0009507 chloroplast
Pp1s28_319V6	218	26	-2.82709		26	373	4.22299						6.57736	0.947857	12.49	14.853	PF00504	PTHR21649			K08917	AT1G15820.1	LHCB6	light harvesting complex photosystem II subunit 6	Photosynthesis - antenna proteins;Metabolic pathways	GO:0016168 chlorophyll binding;GO:0015979 photosynthesis;GO:0009783 photosystem II antenna complex;GO:0009941 chloroplast envelope;GO:0009535 chloroplast thylakoid membrane;GO:0009507 chloroplast;GO:0009535 chloroplast thylakoid membrane;GO:0009535 chloroplast thylakoid membrane;GO:0010287 plastoglobule;GO:0016020 membrane;GO:0010196 nonphotochemical quenching;GO:0015979 photosynthesis;GO:0009507…
Pp1s330_37V6	255	27	-2.99881		27	383	4.20672						7.6937	0.984313	12.8248	31.4255	PF00504	PTHR21649			K08908	AT3G61470.1	LHCA2	photosystem I light harvesting complex gene 2	Photosynthesis - antenna proteins	GO:0009768 "photosynthesis, light harvesting in photosystem I";GO:0009782 photosystem I antenna complex;GO:0015979 photosynthesis;GO:0016168 chlorophyll binding;GO:0030076 light-harvesting complex;GO:0009535 chloroplast thylakoid membrane;GO:0009507 chloroplast;GO:0009535 chloroplast thylakoid membrane;GO:0009535 chloroplast thylakoid membrane;GO:0016020 membrane;GO:0009507 chloroplast;GO:0009579…
Pp1s49_55V6	135	20	-2.51423		20	280	4.18776						4.07313	0.729121	9.37585	15.4459	PF08242,PF08241
Pp1s169_150V6	413	80	-2.12741		80	1118	4.18518						12.4608	2.91648	37.4364	9.93165						AT2G38695.1				GO:0016020 membrane
Pp1s49_283V6	119	20	-2.33223		20	275	4.16176						3.59039	0.729121	9.20843	4.35807	PF00892,PF03151	PTHR11132	KOG1441			AT5G25400.1		Nucleotide-sugar transporter family protein		GO:0008514 organic anion transmembrane transporter activity
Pp1s41_167V6	340	55	-2.38738		55	734	4.11868						10.2583	2.00508	24.5781	8.83472
Pp1s161_120V6	174	24	-2.61733		24	317	4.10378						5.24982	0.874945	10.6148	2.60891	PF07137			1.10.99.3	K09839	AT1G08550.1	NPQ1	non-photochemical quenching 1	Carotenoid biosynthesis;Metabolic pathways;Biosynthesis of secondary metabolites	GO:0010028 xanthophyll cycle;GO:0046422 violaxanthin de-epoxidase activity;GO:0016122 xanthophyll metabolic process;GO:0030095 chloroplast photosystem II;GO:0009543 chloroplast thylakoid lumen;GO:0009543 chloroplast thylakoid lumen;GO:0031977 thylakoid lumen;GO:0009408 response to heat;GO:0006631 fatty acid metabolic process;GO:0015994 chlorophyll metabolic process;GO:0009507 chloroplast;GO:00095…
Pp1s27_130V6	912	147	-2.39256		147	1921	4.08837						27.5163	5.35904	64.325	25.1108	PF00127				K02638	AT1G76100.1	PETE1	plastocyanin 1	Photosynthesis	GO:0005507 copper ion binding;GO:0005507 copper ion binding;GO:0009055 electron carrier activity;GO:0009543 chloroplast thylakoid lumen;GO:0031977 thylakoid lumen;GO:0009543 chloroplast thylakoid lumen;GO:0009579 thylakoid;GO:0009579 thylakoid;GO:0009507 chloroplast;GO:0046688 response to copper ion
Pp1s71_244V6	122	12	-3.10512		12	156	4.08084						3.68091	0.437472	5.22369	1.45269	PF08534,PF00578,PF01436	PTHR13712:SF9				AT1G56500.1		haloacid dehalogenase-like hydrolase family protein		GO:0003824 catalytic activity;GO:0008152 metabolic process;GO:0016491 oxidoreductase activity;GO:0016787 hydrolase activity;GO:0016787 hydrolase activity;GO:0045454 cell redox homeostasis;GO:0009570 chloroplast stroma;GO:0009507 chloroplast;GO:0009570 chloroplast stroma
Pp1s181_3V6	1006	115	-2.88827		115	1490	4.07601						30.3524	4.19244	49.8929	54.4907	PF00012	PTHR19375	KOG0100		K09490	AT5G42020.1	BIP2	Heat shock protein 70 (Hsp 70) family protein	Protein export;Protein processing in endoplasmic reticulum	GO:0005524 ATP binding;GO:0005524 ATP binding;GO:0005783 endoplasmic reticulum;GO:0006457 protein folding;GO:0005788 endoplasmic reticulum lumen;GO:0006457 protein folding;GO:0005634 nucleus;GO:0005634 nucleus;GO:0005730 nucleolus;GO:0005730 nucleolus;GO:0005773 vacuole;GO:0005773 vacuole;GO:0005618 cell wall;GO:0005618 cell wall;GO:0046686 response to cadmium ion;GO:0046686 response to cadmium i…
Pp1s221_76V6	229	19	-3.35062		19	237	4.02122						6.90924	0.692665	7.93599	4.38772	PF06298				K02723	AT1G67740.1	PSBY	photosystem II BY	Photosynthesis;Metabolic pathways	GO:0015979 photosynthesis;GO:0015979 photosynthesis;GO:0030095 chloroplast photosystem II;GO:0030145 manganese ion binding;GO:0009535 chloroplast thylakoid membrane;GO:0009523 photosystem II;GO:0009533 chloroplast stromal thylakoid
Pp1s30_39V6	277	39	-2.58768		39	484	4.01386						8.35747	1.42179	16.2068	4.53595	PF10518,PF01789					AT3G55330.1	PPL1	PsbP-like protein 1	Photosynthesis;Metabolic pathways	GO:0005509 calcium ion binding;GO:0009654 oxygen evolving complex;GO:0015979 photosynthesis;GO:0030095 chloroplast photosystem II;GO:0009543 chloroplast thylakoid lumen;GO:0031977 thylakoid lumen;GO:0009543 chloroplast thylakoid lumen;GO:0009579 thylakoid;GO:0009507 chloroplast;GO:0009507 chloroplast
Pp1s276_86V6	404	78	-2.13215		78	965	4.00939						12.1892	2.84357	32.3132	7.53027	PF02347	PTHR11773	KOG2040	1.4.4.2	K00281	AT2G26080.1	GLDP2	glycine decarboxylase P-protein 2	Glycine, serine and threonine metabolism;Metabolic pathways	GO:0004375 glycine dehydrogenase (decarboxylating) activity;GO:0005960 glycine cleavage complex;GO:0006544 glycine metabolic process;GO:0019464 glycine decarboxylation via glycine cleavage system;GO:0055114 oxidation-reduction process;GO:0009941 chloroplast envelope;GO:0005739 mitochondrion;GO:0009507 chloroplast;GO:0005524 ATP binding;GO:0005739 mitochondrion;GO:0005739 mitochondrion;GO:0009507 …
Pp1s324_20V6	502	17	-4.64343		17	210	4.00718						15.146	0.619753	7.03189	3.55761	PF01632					AT2G24090.1		Ribosomal protein L35		GO:0003735 structural constituent of ribosome;GO:0003735 structural constituent of ribosome;GO:0005840 ribosome;GO:0006412 translation;GO:0006412 translation;GO:0009507 chloroplast
Pp1s175_68V6	218	30	-2.62064		30	367	3.99315						6.57736	1.09368	12.2891	3.73549	PF04674					AT4G08950.1	EXO	Phosphate-responsive 1 family protein		GO:0003674 molecular_function;GO:0005618 cell wall;GO:0009505 plant-type cell wall;GO:0009505 plant-type cell wall;GO:0009741 response to brassinosteroid stimulus;GO:0005829 cytosol
Pp1s485_2V6	166	9	-3.96446		9	108	3.96536						5.00845	0.328104	3.6164	1.27481	PF00657					AT5G03610.1		GDSL-like Lipase/Acylhydrolase superfamily protein		GO:0004091 carboxylesterase activity;GO:0006629 lipid metabolic process;GO:0012505 endomembrane system;GO:0016788 "hydrolase activity, acting on ester bonds"
Pp1s28_238V6	118	10	-3.32006		10	118	3.94112						3.56022	0.36456	3.95125	1.00799	PF00657	PTHR22835:SF27				AT1G29660.1		GDSL-like Lipase/Acylhydrolase superfamily protein		GO:0004091 carboxylesterase activity;GO:0006629 lipid metabolic process;GO:0016788 "hydrolase activity, acting on ester bonds";GO:0005634 nucleus;GO:0048046 apoplast
Pp1s108_171V6	814	53	-3.70031		53	623	3.93557						24.5595	1.93217	20.8613	12.7184		PTHR19410	KOG1208	1.3.1.33	K00218	AT5G54190.1	PORA	protochlorophyllide oxidoreductase A	Porphyrin and chlorophyll metabolism;Metabolic pathways;Biosynthesis of secondary metabolites	GO:0016491 oxidoreductase activity;GO:0016630 protochlorophyllide reductase activity;GO:0009723 response to ethylene stimulus;GO:0015995 chlorophyll biosynthetic process;GO:0016630 protochlorophyllide reductase activity;GO:0009507 chloroplast
Pp1s131_184V6	380	42	-2.93688		42	459	3.83044						11.4651	1.53115	15.3697	4.44701					K08902	AT1G03600.1	PSB27	photosystem II family protein	Photosynthesis;Metabolic pathways	GO:0003674 molecular_function;GO:0030095 chloroplast photosystem II;GO:0009543 chloroplast thylakoid lumen;GO:0009579 thylakoid;GO:0009535 chloroplast thylakoid membrane;GO:0009579 thylakoid;GO:0009507 chloroplast;GO:0009535 chloroplast thylakoid membrane;GO:0009535 chloroplast thylakoid membrane;GO:0009507 chloroplast;GO:0010206 photosystem II repair
Pp1s117_86V6	322	33	-3.04587		33	354	3.80361						9.71518	1.20305	11.8538	3.14255	PF00297	PTHR11229	KOG3141		K02906	AT2G43030.1		Ribosomal protein L3 family protein	Ribosome	GO:0003735 structural constituent of ribosome;GO:0003735 structural constituent of ribosome;GO:0005840 ribosome;GO:0006412 translation;GO:0006412 translation;GO:0009507 chloroplast;GO:0009570 chloroplast stroma;GO:0016020 membrane;GO:0009507 chloroplast;GO:0009570 chloroplast stroma
Pp1s112_25V6	268	33	-2.78104		33	347	3.7748						8.08593	1.20305	11.6194	7.88603	PF00076	PTHR15241	KOG4207			AT3G23830.2	GRP4	glycine-rich RNA-binding protein 4		GO:0003723 RNA binding;GO:0003690 double-stranded DNA binding;GO:0003697 single-stranded DNA binding;GO:0003723 RNA binding;GO:0006970 response to osmotic stress;GO:0009651 response to salt stress
Pp1s34_348V6	4	126	5.21794		126	1307	3.75517						0.120685	4.59346	43.7651	31.1587
Pp1s651_2V6	123	17	-2.6144		17	166	3.66798						3.71108	0.619753	5.55854	1.57128	PF00504	PTHR21649			K08908	AT3G61470.1	LHCA2	photosystem I light harvesting complex gene 2	Photosynthesis - antenna proteins	GO:0009768 "photosynthesis, light harvesting in photosystem I";GO:0009782 photosystem I antenna complex;GO:0015979 photosynthesis;GO:0016168 chlorophyll binding;GO:0030076 light-harvesting complex;GO:0009535 chloroplast thylakoid membrane;GO:0009507 chloroplast;GO:0009535 chloroplast thylakoid membrane;GO:0009535 chloroplast thylakoid membrane;GO:0016020 membrane;GO:0009507 chloroplast;GO:0009579…
Pp1s36_271V6	192	36	-2.17438		36	341	3.62411						5.7929	1.31242	11.4184	5.8997	PF01111	PTHR23415	KOG3484		K02219	AT2G27970.1	CKS2	CDK-subunit 2		GO:0004693 cyclin-dependent protein kinase activity;GO:0007049 cell cycle;GO:0007049 cell cycle;GO:0016538 cyclin-dependent protein kinase regulator activity;GO:0005634 nucleus;GO:0005737 cytoplasm;GO:0005515 protein binding;GO:0005515 protein binding
Pp1s18_23V6	315	55	-2.27719		55	477	3.49689						9.50398	2.00508	15.9724	11.2954	PF00289,PF02786,PF02785	PTHR18866		6.3.4.14,6.4.1.2	K01961	AT5G35360.1	CAC2	acetyl Co-enzyme a carboxylase biotin carboxylase subunit	Fatty acid biosynthesis;Pyruvate metabolism;Propanoate metabolism;Metabolic pathways;Biosynthesis of secondary metabolites	GO:0009941 chloroplast envelope;GO:0009570 chloroplast stroma;GO:0009507 chloroplast;GO:0009507 chloroplast;GO:0005829 cytosol;GO:0003989 acetyl-CoA carboxylase activity;GO:0004075 biotin carboxylase activity;GO:0006633 fatty acid biosynthetic process;GO:0009507 chloroplast
Pp1s381_46V6	194	41	-2.00171		41	354	3.49046						5.85324	1.4947	11.8538	27.1564	PF00111					AT1G60950.1	FED A	2Fe-2S ferredoxin-like superfamily protein	Photosynthesis	GO:0009055 electron carrier activity;GO:0051536 iron-sulfur cluster binding;GO:0051537 "2 iron, 2 sulfur cluster binding";GO:0005515 protein binding;GO:0009507 chloroplast;GO:0009767 photosynthetic electron transport chain;GO:0009416 response to light stimulus;GO:0009570 chloroplast stroma;GO:0009767 photosynthetic electron transport chain
Pp1s130_5V6	139	20	-2.55636		20	171	3.47633						4.19382	0.729121	5.72597	9.22013	PF01397,PF03936			5.5.1.13	K04120	AT4G02780.1	GA1	Terpenoid cyclases/Protein prenyltransferases superfamily protein	Diterpenoid biosynthesis;Metabolic pathways;Biosynthesis of secondary metabolites	GO:0000287 magnesium ion binding;GO:0009905 ent-copalyl diphosphate synthase activity;GO:0009507 chloroplast;GO:0009507 chloroplast;GO:0009507 chloroplast;GO:0009686 gibberellin biosynthetic process;GO:0009686 gibberellin biosynthetic process;GO:0009740 gibberellic acid mediated signaling pathway;GO:0009905 ent-copalyl diphosphate synthase activity;GO:0009905 ent-copalyl diphosphate synthase acti…
Pp1s7_212V6	134	16	-2.82543		16	132	3.4248						4.04296	0.583297	4.42004	1.98633
Pp1s93_161V6	227	30	-2.679		30	241	3.3864						6.8489	1.09368	8.06993	2.04562	PF00702	PTHR18901	KOG2914			AT4G39970.1		Haloacid dehalogenase-like hydrolase (HAD) superfamily protein		GO:0003824 catalytic activity;GO:0008152 metabolic process;GO:0016787 hydrolase activity;GO:0016787 hydrolase activity;GO:0009941 chloroplast envelope;GO:0009570 chloroplast stroma;GO:0009507 chloroplast;GO:0009570 chloroplast stroma
Pp1s169_50V6	773	80	-3.03174		80	635	3.36909						23.3225	2.91648	21.2631	6.40369	PF01409,PF03147	PTHR11538	KOG2783	6.1.1.20	K01889	AT3G58140.1		phenylalanyl-tRNA synthetase class IIc family protein	Aminoacyl-tRNA biosynthesis	GO:0000049 tRNA binding;GO:0000166 nucleotide binding;GO:0000287 magnesium ion binding;GO:0004812 aminoacyl-tRNA ligase activity;GO:0004826 phenylalanine-tRNA ligase activity;GO:0004826 phenylalanine-tRNA ligase activity;GO:0005524 ATP binding;GO:0005524 ATP binding;GO:0006412 translation;GO:0006418 tRNA aminoacylation for protein translation;GO:0006432 phenylalanyl-tRNA aminoacylation;GO:0006432…
Pp1s36_31V6	467	78	-2.34122		78	568	3.24475						14.09	2.84357	19.0196	13.934	PF01474	PTHR21337		2.5.1.54	K01626	AT1G22410.1		Class-II DAHP synthetase family protein	Phenylalanine, tyrosine and tryptophan biosynthesis;Metabolic pathways;Biosynthesis of secondary metabolites	GO:0003849 3-deoxy-7-phosphoheptulonate synthase activity;GO:0016020 membrane;GO:0009073 aromatic amino acid family biosynthetic process
Pp1s8_297V6	202	21	-3.02524		21	146	3.17791						6.09462	0.765577	4.88884	3.29079	PF07992,PF00070	PTHR22912	KOG0404	1.8.1.9	K00384	AT2G17420.1	NTRA	NADPH-dependent thioredoxin reductase A	Pyrimidine metabolism;Selenoamino acid metabolism	GO:0004791 thioredoxin-disulfide reductase activity;GO:0005759 mitochondrial matrix;GO:0005829 cytosol;GO:0046686 response to cadmium ion;GO:0009846 pollen germination;GO:0016049 cell growth;GO:0042964 thioredoxin biosynthetic process;GO:0045454 cell redox homeostasis;GO:0048316 seed development;GO:0005829 cytosol
Pp1s414_7V6	215	30	-2.60065		30	205	3.15299						6.48684	1.09368	6.86446	2.16421	PF01883,PF01656,PF10609	PTHR23264	KOG3022			AT3G24430.1	HCF101	ATP binding		GO:0005524 ATP binding;GO:0055114 oxidation-reduction process;GO:0009507 chloroplast
Pp1s53_177V6	169	23	-2.63666		23	153	3.11423						5.09896	0.838489	5.12323	1.95668	PF04418					AT1G22520.2		Domain of unknown function (DUF543)		GO:0003674 molecular_function;GO:0008150 biological_process;GO:0005739 mitochondrion
Pp1s84_209V6	515	52	-3.06733		52	332	3.055						15.5383	1.89571	11.1171	15.2088	PF08240,PF00107	PTHR11695	KOG0023			AT1G72680.1	CAD1	cinnamyl-alcohol dehydrogenase		GO:0008270 zinc ion binding;GO:0016491 oxidoreductase activity;GO:0016616 "oxidoreductase activity, acting on the CH-OH group of donors, NAD or NADP as acceptor";GO:0048037 cofactor binding;GO:0009809 lignin biosynthetic process;GO:0005829 cytosol;GO:0009809 lignin biosynthetic process
Pp1s73_31V6	740	40	-3.9688		40	255	3.05283						22.3268	1.45824	8.53872	5.24747						AT4G02530.1		chloroplast thylakoid lumen protein		GO:0003674 molecular_function;GO:0008150 biological_process;GO:0009543 chloroplast thylakoid lumen;GO:0031977 thylakoid lumen;GO:0009543 chloroplast thylakoid lumen;GO:0009579 thylakoid;GO:0009535 chloroplast thylakoid membrane;GO:0009579 thylakoid;GO:0009507 chloroplast;GO:0009535 chloroplast thylakoid membrane;GO:0009535 chloroplast thylakoid membrane;GO:0009570 chloroplast stroma;GO:0009579 th…
Pp1s1_515V6	231	37	-2.40164		37	233	3.03514						6.96959	1.34887	7.80205	1.92704	PF00579,PF01479	PTHR11766	KOG2623	6.1.1.1	K01866	AT3G02660.1	emb2768	Tyrosyl-tRNA synthetase, class Ib, bacterial/mitochondrial	Aminoacyl-tRNA biosynthesis	GO:0000166 nucleotide binding;GO:0003723 RNA binding;GO:0004812 aminoacyl-tRNA ligase activity;GO:0004812 aminoacyl-tRNA ligase activity;GO:0004831 tyrosine-tRNA ligase activity;GO:0005524 ATP binding;GO:0005524 ATP binding;GO:0006418 tRNA aminoacylation for protein translation;GO:0005739 mitochondrion;GO:0009507 chloroplast;GO:0009793 embryo development ending in seed dormancy;GO:0009507 chlorop…
Pp1s154_32V6	111	16	-2.55376		16	100	3.02426						3.34902	0.583297	3.34852	1.09693
Pp1s68_169V6	107	21	-2.10849		21	131	3.02151						3.22834	0.765577	4.38656	1.66022	PF00800,PF01842	PTHR21022	KOG2797			AT1G08250.1	ADT6	arogenate dehydratase 6		GO:0004664 prephenate dehydratase activity;GO:0009094 L-phenylalanine biosynthetic process;GO:0009094 L-phenylalanine biosynthetic process;GO:0047769 arogenate dehydratase activity;GO:0009507 chloroplast
Pp1s134_66V6	242	44	-2.21878		44	271	3.00312						7.30147	1.60407	9.07449	2.75715	PF00573	PTHR10746	KOG1624			AT1G07320.1	RPL4	ribosomal protein L4		GO:0003735 structural constituent of ribosome;GO:0005840 ribosome;GO:0006412 translation;GO:0009579 thylakoid;GO:0009579 thylakoid;GO:0005634 nucleus;GO:0005634 nucleus;GO:0009507 chloroplast;GO:0009507 chloroplast;GO:0009535 chloroplast thylakoid membrane;GO:0009535 chloroplast thylakoid membrane;GO:0009535 chloroplast thylakoid membrane;GO:0022626 cytosolic ribosome;GO:0022626 cytosolic ribosom…
Pp1s358_16V6	317	41	-2.71013		41	251	2.99439						9.56432	1.4947	8.40478	4.98065
Pp1s381_21V6	584	106	-2.22125		106	642	2.97891						17.6201	3.86434	21.4975	11.918	PF00022	PTHR11937	KOG0676		K10355	AT5G09810.1	ACT7	actin 7		GO:0007010 cytoskeleton organization;GO:0009733 response to auxin stimulus;GO:0009845 seed germination;GO:0048364 root development;GO:0005739 mitochondrion;GO:0005730 nucleolus;GO:0005618 cell wall;GO:0005886 plasma membrane;GO:0005886 plasma membrane;GO:0010053 root epidermal cell differentiation;GO:0048364 root development;GO:0048767 root hair elongation;GO:0051301 cell division;GO:0005515 prot…
Pp1s128_49V6	391	53	-2.64245		53	321	2.97891						11.797	1.93217	10.7487	3.40937	PF00380	PTHR21569	KOG1753		K02996	AT1G74970.1	RPS9	ribosomal protein S9	Ribosome	GO:0003735 structural constituent of ribosome;GO:0006412 translation;GO:0022627 cytosolic small ribosomal subunit;GO:0000312 plastid small ribosomal subunit;GO:0003735 structural constituent of ribosome;GO:0006412 translation;GO:0009941 chloroplast envelope;GO:0009507 chloroplast;GO:0009570 chloroplast stroma;GO:0016020 membrane;GO:0009507 chloroplast
Pp1s461_15V6	2251	366	-2.37999		366	2215	2.97779						67.9157	13.3429	74.1697	178.888	PF01095					AT5G19730.1		Pectin lyase-like superfamily protein	Pentose and glucuronate interconversions;Starch and sucrose metabolism;Metabolic pathways	GO:0009505 plant-type cell wall;GO:0030599 pectinesterase activity;GO:0030599 pectinesterase activity;GO:0042545 cell wall modification;GO:0005618 cell wall;GO:0005737 cytoplasm
Pp1s28_315V6	512	76	-2.51142		76	459	2.97483						15.4477	2.77066	15.3697	24.4289	PF00504	PTHR21649			K08917	AT1G15820.1	LHCB6	light harvesting complex photosystem II subunit 6	Photosynthesis - antenna proteins;Metabolic pathways	GO:0016168 chlorophyll binding;GO:0015979 photosynthesis;GO:0009783 photosystem II antenna complex;GO:0009941 chloroplast envelope;GO:0009535 chloroplast thylakoid membrane;GO:0009507 chloroplast;GO:0009535 chloroplast thylakoid membrane;GO:0009535 chloroplast thylakoid membrane;GO:0010287 plastoglobule;GO:0016020 membrane;GO:0010196 nonphotochemical quenching;GO:0015979 photosynthesis;GO:0009507…
Pp1s234_46V6	142	17	-2.82163		17	101	2.95115						4.28433	0.619753	3.382	4.47666	PF03255	PTHR22855		6.4.1.2	K01962	AT2G38040.1	CAC3	acetyl Co-enzyme a carboxylase carboxyltransferase alpha subunit	Fatty acid biosynthesis;Pyruvate metabolism;Propanoate metabolism;Metabolic pathways;Biosynthesis of secondary metabolites	GO:0003989 acetyl-CoA carboxylase activity;GO:0003989 acetyl-CoA carboxylase activity;GO:0006633 fatty acid biosynthetic process;GO:0006633 fatty acid biosynthetic process;GO:0006633 fatty acid biosynthetic process;GO:0009317 acetyl-CoA carboxylase complex;GO:0009941 chloroplast envelope;GO:0009941 chloroplast envelope;GO:0009941 chloroplast envelope;GO:0009941 chloroplast envelope;GO:0009507 chl…
Pp1s28_115V6	218	23	-3.00397		23	136	2.9443						6.57736	0.838489	4.55399	3.32043	PF00400	PTHR19854	KOG0278			AT5G24710.1		Transducin/WD40 repeat-like superfamily protein		GO:0003674 molecular_function;GO:0008150 biological_process;GO:0005886 plasma membrane;GO:0005829 cytosol
Pp1s60_169V6	237	32	-2.64809		32	187	2.9273						7.15061	1.16659	6.26173	1.68986	PF00542	PTHR11809	KOG1715		K02935	AT3G27850.1	RPL12-C	ribosomal protein L12-C	Ribosome	GO:0003735 structural constituent of ribosome;GO:0003735 structural constituent of ribosome;GO:0006412 translation;GO:0015934 large ribosomal subunit;GO:0009579 thylakoid;GO:0009535 chloroplast thylakoid membrane;GO:0009579 thylakoid;GO:0009507 chloroplast;GO:0009535 chloroplast thylakoid membrane;GO:0009535 chloroplast thylakoid membrane;GO:0009579 thylakoid;GO:0042742 defense response to bacter…
Pp1s12_29V6	1685	175	-3.02667		175	974	2.85697						50.8387	6.37981	32.6146	30.1211	PF00005,PF01061,PF08370	PTHR19241	KOG0065			AT1G15520.1	PDR12	pleiotropic drug resistance 12		GO:0042626 "ATPase activity, coupled to transmembrane movement of substances";GO:0005886 plasma membrane;GO:0015692 lead ion transport;GO:0006855 drug transmembrane transport;GO:0009607 response to biotic stimulus;GO:0009723 response to ethylene stimulus;GO:0009751 response to salicylic acid stimulus;GO:0009753 response to jasmonic acid stimulus;GO:0010193 response to ozone;GO:0005886 plasma memb…
Pp1s232_57V6	203	39	-2.13928		39	217	2.85655						6.12479	1.42179	7.26629	1.98633		PTHR11926	KOG1192			AT4G01070.1	GT72B1	UDP-Glycosyltransferase superfamily protein		GO:0008194 UDP-glycosyltransferase activity;GO:0016757 "transferase activity, transferring glycosyl groups";GO:0035251 UDP-glucosyltransferase activity;GO:0008194 UDP-glycosyltransferase activity;GO:0009636 response to toxin;GO:0042178 xenobiotic catabolic process;GO:0008194 UDP-glycosyltransferase activity;GO:0006805 xenobiotic metabolic process;GO:0035251 UDP-glucosyltransferase activity;GO:000…
Pp1s135_79V6	638	118	-2.19411		118	649	2.83983						19.2493	4.30181	21.7319	4.59524	PF01789				K02717	AT1G06680.1	PSBP-1	photosystem II subunit P-1	Photosynthesis;Metabolic pathways	GO:0009543 chloroplast thylakoid lumen;GO:0009654 oxygen evolving complex;GO:0030095 chloroplast photosystem II;GO:0009534 chloroplast thylakoid;GO:0019898 extrinsic to membrane;GO:0031977 thylakoid lumen;GO:0009543 chloroplast thylakoid lumen;GO:0009579 thylakoid;GO:0009941 chloroplast envelope;GO:0009535 chloroplast thylakoid membrane;GO:0009579 thylakoid;GO:0009507 chloroplast;GO:0009535 chlor…
Pp1s81_246V6	994	28	-4.90909		28	154	2.83983						29.9903	1.02077	5.15672	1.15622	PF00722,PF06955					AT4G03210.1	XTH9	xyloglucan endotransglucosylase/hydrolase 9		GO:0005618 cell wall;GO:0005618 cell wall;GO:0005975 carbohydrate metabolic process;GO:0005975 carbohydrate metabolic process;GO:0006073 cellular glucan metabolic process;GO:0006073 cellular glucan metabolic process;GO:0012505 endomembrane system;GO:0016798 "hydrolase activity, acting on glycosyl bonds";GO:0048046 apoplast;GO:0048046 apoplast;GO:0016762 xyloglucan:xyloglucosyl transferase activity
Pp1s123_97V6	1300	82	-3.74609		82	446	2.82375						39.2228	2.98939	14.9344	6.7891	PF04536					AT1G54780.1	TLP18.3	thylakoid lumen 18.3 kDa protein		GO:0003674 molecular_function;GO:0009543 chloroplast thylakoid lumen;GO:0031977 thylakoid lumen;GO:0009543 chloroplast thylakoid lumen;GO:0009579 thylakoid;GO:0009535 chloroplast thylakoid membrane;GO:0009507 chloroplast;GO:0009535 chloroplast thylakoid membrane;GO:0009535 chloroplast thylakoid membrane;GO:0010206 photosystem II repair;GO:0009507 chloroplast;GO:0009579 thylakoid
Pp1s55_204V6	608	123	-2.06476		123	667	2.81943						18.3442	4.48409	22.3346	5.36606	PF07994,PF01658	PTHR11510	KOG0693			AT2G22240.1	MIPS2	myo-inositol-1-phosphate synthase 2	Inositol phosphate metabolism;Metabolic pathways;Biosynthesis of secondary metabolites	GO:0004512 inositol-3-phosphate synthase activity;GO:0006021 inositol biosynthetic process;GO:0008654 phospholipid biosynthetic process;GO:0009733 response to auxin stimulus;GO:0016036 cellular response to phosphate starvation;GO:0009408 response to heat;GO:0009644 response to high light intensity;GO:0042542 response to hydrogen peroxide;GO:0010264 myo-inositol hexakisphosphate biosynthetic proce…
Pp1s308_11V6	3006	193	-3.72052		193	1021	2.78371						90.6951	7.03601	34.1884	41.0904	PF07732,PF00394,PF07731	PTHR11709	KOG1263	1.10.3.3	K00423	AT5G21105.1		Plant L-ascorbate oxidase		GO:0005507 copper ion binding;GO:0005507 copper ion binding;GO:0005507 copper ion binding;GO:0005507 copper ion binding;GO:0008447 L-ascorbate oxidase activity;GO:0008447 L-ascorbate oxidase activity;GO:0008447 L-ascorbate oxidase activity;GO:0008447 L-ascorbate oxidase activity;GO:0016491 oxidoreductase activity;GO:0016491 oxidoreductase activity;GO:0016491 oxidoreductase activity;GO:0055114 oxi…
Pp1s9_407V6	185	38	-2.0428		38	198	2.76183						5.5817	1.38533	6.63007	2.2828						AT5G47570.1				GO:0003674 molecular_function;GO:0008150 biological_process;GO:0005747 mitochondrial respiratory chain complex I;GO:0005747 mitochondrial respiratory chain complex I
Pp1s142_144V6	129	22	-2.31114		22	112	2.72833						3.89211	0.802033	3.75034	4.89171	PF09298,PF01557	PTHR11820	KOG2843	3.7.1.2	K01555	AT1G12050.1		fumarylacetoacetase, putative	Tyrosine metabolism;Metabolic pathways	GO:0003824 catalytic activity;GO:0004334 fumarylacetoacetase activity;GO:0004334 fumarylacetoacetase activity;GO:0008152 metabolic process;GO:0009072 aromatic amino acid family metabolic process;GO:0009072 aromatic amino acid family metabolic process;GO:0005829 cytosol
Pp1s331_37V6	218	28	-2.72017		28	137	2.67108						6.57736	1.02077	4.58747	2.99432	PF01747	PTHR11055	KOG0636	2.7.1.25,2.7.7.4	K13811	AT3G22890.1	APS1	ATP sulfurylase 1	Purine metabolism;Selenoamino acid metabolism;Sulfur metabolism;Metabolic pathways	GO:0009570 chloroplast stroma;GO:0046686 response to cadmium ion;GO:0005886 plasma membrane;GO:0009507 chloroplast;GO:0009570 chloroplast stroma;GO:0005829 cytosol;GO:0004781 sulfate adenylyltransferase (ATP) activity;GO:0009507 chloroplast
Pp1s343_26V6	300	41	-2.63061		41	197	2.6449						9.05141	1.4947	6.59658	5.42535	PF00581					AT5G23060.1	CaS	calcium sensing receptor		GO:0005739 mitochondrion;GO:0009535 chloroplast thylakoid membrane;GO:0009507 chloroplast;GO:0009535 chloroplast thylakoid membrane;GO:0009535 chloroplast thylakoid membrane;GO:0009507 chloroplast;GO:0009507 chloroplast;GO:0009579 thylakoid;GO:0071277 cellular response to calcium ion;GO:0090333 regulation of stomatal closure;GO:0009579 thylakoid
Pp1s101_174V6	190	33	-2.28481		33	158	2.63979						5.73256	1.20305	5.29066	1.7788	PF00338	PTHR11700	KOG0900		K02946	AT3G13120.1		Ribosomal protein S10p/S20e family protein	Ribosome	GO:0003723 RNA binding;GO:0003723 RNA binding;GO:0003735 structural constituent of ribosome;GO:0003735 structural constituent of ribosome;GO:0003735 structural constituent of ribosome;GO:0006412 translation;GO:0006412 translation;GO:0006412 translation;GO:0015935 small ribosomal subunit;GO:0009507 chloroplast
Pp1s22_322V6	2520	326	-2.70982		326	1559	2.63808						76.0318	11.8847	52.2034	67.8317	PF00407,PF10604					AT1G24020.1	MLP423	MLP-like protein 423		GO:0006952 defense response;GO:0006952 defense response;GO:0009607 response to biotic stimulus;GO:0009607 response to biotic stimulus;GO:0016020 membrane
Pp1s186_83V6	799	148	-2.19194		148	707	2.63652						24.1069	5.39549	23.674	17.7287	PF00430			3.6.3.14	K02109	AT4G32260.1		ATPase, F0 complex, subunit B/B\', bacterial/chloroplast	Oxidative phosphorylation;Photosynthesis;Metabolic pathways	GO:0015078 hydrogen ion transmembrane transporter activity;GO:0009941 chloroplast envelope;GO:0009535 chloroplast thylakoid membrane;GO:0009579 thylakoid;GO:0009507 chloroplast;GO:0009535 chloroplast thylakoid membrane;GO:0009535 chloroplast thylakoid membrane;GO:0042742 defense response to bacterium;GO:0016020 membrane;GO:0009507 chloroplast;GO:0009579 thylakoid
Pp1s338_12V6	290	30	-3.03236		30	143	2.63338						8.7497	1.09368	4.78838	15.9499	PF00664,PF00005	PTHR19242	KOG0055			AT3G28345.1		ABC transporter family protein		GO:0006200 ATP catabolic process;GO:0010315 auxin efflux;GO:0010329 auxin efflux transmembrane transporter activity;GO:0010540 basipetal auxin transport;GO:0010541 acropetal auxin transport;GO:0016021 integral to membrane;GO:0042626 "ATPase activity, coupled to transmembrane movement of substances";GO:0042626 "ATPase activity, coupled to transmembrane movement of substances";GO:0055085 transmembr…
Pp1s4_75V6	868	175	-2.06968		175	817	2.60338						26.1887	6.37981	27.3574	14.9716	PF01329	PTHR12599	KOG4073			AT5G51110.1		Transcriptional coactivator/pterin dehydratase		GO:0006729 tetrahydrobiopterin biosynthetic process;GO:0006729 tetrahydrobiopterin biosynthetic process;GO:0008124 4-alpha-hydroxytetrahydrobiopterin dehydratase activity;GO:0008124 4-alpha-hydroxytetrahydrobiopterin dehydratase activity;GO:0009507 chloroplast
Pp1s66_129V6	169	24	-2.57526		24	110	2.5768						5.09896	0.874945	3.68337	1.63057	PF00575	PTHR10724				AT1G12800.1		Nucleic acid-binding, OB-fold-like protein		GO:0003723 RNA binding;GO:0003723 RNA binding;GO:0009507 chloroplast
Pp1s343_50V6	333	55	-2.35736		55	250	2.56483						10.0471	2.00508	8.3713	4.35807	PF00166	PTHR10772	KOG1641			AT3G60210.1		GroES-like family protein		GO:0005524 ATP binding;GO:0005737 cytoplasm;GO:0006457 protein folding;GO:0009507 chloroplast
Pp1s475_29V6	435	66	-2.47982		66	293	2.53076						13.1245	2.4061	9.81116	7.47097	PF00909	PTHR11730	KOG0682			AT1G64780.1	AMT1;2	ammonium transporter 1;2		GO:0006810 transport;GO:0008519 ammonium transmembrane transporter activity;GO:0016020 membrane;GO:0009624 response to nematode;GO:0005886 plasma membrane;GO:0015696 ammonium transport;GO:0015843 methylammonium transport
Pp1s145_142V6	535	45	-3.33089		45	197	2.5106						16.1417	1.64052	6.59658	9.4573	PF00162	PTHR11406	KOG1367			AT1G79550.2	PGK	phosphoglycerate kinase	Glycolysis / Gluconeogenesis;Carbon fixation in photosynthetic organisms;Metabolic pathways;Biosynthesis of secondary metabolites	GO:0006096 glycolysis;GO:0006096 glycolysis;GO:0006096 glycolysis;GO:0004618 phosphoglycerate kinase activity;GO:0005829 cytosol;GO:0005634 nucleus;GO:0005634 nucleus;GO:0005774 vacuolar membrane;GO:0005774 vacuolar membrane;GO:0005886 plasma membrane;GO:0005886 plasma membrane;GO:0016020 membrane;GO:0016020 membrane;GO:0005886 plasma membrane;GO:0005886 plasma membrane;GO:0048046 apoplast;GO:004…
Pp1s159_143V6	1065	160	-2.49405		160	695	2.49934						32.1325	5.83297	23.2722	15.0012	PF02672					AT2G47400.1	CP12-1	CP12 domain-containing protein 1		GO:0003674 molecular_function;GO:0005515 protein binding;GO:0009570 chloroplast stroma;GO:0009507 chloroplast;GO:0009507 chloroplast;GO:0080153 negative regulation of reductive pentose-phosphate cycle
Pp1s84_39V6	197	25	-2.73754		25	107	2.47801						5.94376	0.911401	3.58292	4.09125	PF12023					AT5G11970.1		Protein of unknown function (DUF3511)		GO:0003674 molecular_function;GO:0008150 biological_process;GO:0005886 plasma membrane
Pp1s230_42V6	411	66	-2.39794		66	282	2.47556						12.4004	2.4061	9.44282	2.10492	PF10664					AT4G37925.1	NDH-M	subunit NDH-M of NAD(P)H:plastoquinone dehydrogenase complex		GO:0016655 "oxidoreductase activity, acting on NADH or NADPH, quinone or similar compound as acceptor";GO:0009535 chloroplast thylakoid membrane;GO:0010258 NADH dehydrogenase complex (plastoquinone) assembly;GO:0010598 NAD(P)H dehydrogenase complex (plastoquinone);GO:0009507 chloroplast
Pp1s456_19V6	1377	202	-2.52845		202	856	2.46366						41.546	7.36412	28.6633	27.2453	PF06747		KOG4090			AT5G09570.1		Cox19-like CHCH family protein		GO:0003674 molecular_function;GO:0008150 biological_process
Pp1s13_225V6	189	31	-2.36739		31	131	2.45963						5.70239	1.13014	4.38656	3.46867	PF03141,PF08241					AT3G51070.1		S-adenosyl-L-methionine-dependent methyltransferases superfamily protein		GO:0008150 biological_process
Pp1s373_13V6	124	26	-2.0131		26	109	2.44815						3.74125	0.947857	3.64989	3.20185	PF02990	PTHR10766	KOG1277			AT2G01970.1		Endomembrane protein 70 protein family		GO:0006810 transport;GO:0016021 integral to membrane;GO:0009505 plant-type cell wall;GO:0005794 Golgi apparatus;GO:0005774 vacuolar membrane
Pp1s173_129V6	503	90	-2.24191		90	377	2.44697						15.1762	3.28104	12.6239	2.87573	PF07250,PF09118					AT3G53950.1		glyoxal oxidase-related protein		GO:0003674 molecular_function;GO:0008150 biological_process
Pp1s343_8V6	273	33	-2.80771		33	137	2.43404						8.23678	1.20305	4.58747	4.41736
Pp1s108_101V6	498	67	-2.65326		67	275	2.4176						15.0253	2.44255	9.20843	3.23149
Pp1s79_92V6	377	57	-2.48488		57	233	2.4117						11.3746	2.07799	7.80205	3.32043	PF00089,PF00595	PTHR22939	KOG1320			AT3G27925.1	DEGP1	DegP protease 1		GO:0006508 proteolysis;GO:0008236 serine-type peptidase activity;GO:0009543 chloroplast thylakoid lumen;GO:0031977 thylakoid lumen;GO:0009543 chloroplast thylakoid lumen;GO:0009579 thylakoid;GO:0004252 serine-type endopeptidase activity;GO:0030163 protein catabolic process;GO:0005634 nucleus;GO:0009507 chloroplast;GO:0009579 thylakoid;GO:0008236 serine-type peptidase activity;GO:0010206 photosyst…
Pp1s139_123V6	150	28	-2.18081		28	110	2.35441						4.5257	1.02077	3.68337	1.51198	PF00627	PTHR21269				AT5G53330.1		Ubiquitin-associated/translation elongation factor EF1B protein		GO:0003674 molecular_function;GO:0005575 cellular_component;GO:0008150 biological_process
Pp1s28_15V6	26	126	2.5175		126	487	2.3309						0.784455	4.59346	16.3073	5.69217	PF00827	PTHR11847	KOG1678		K02877	AT4G16720.1		Ribosomal protein L23/L15e family protein	Ribosome	GO:0003735 structural constituent of ribosome;GO:0003735 structural constituent of ribosome;GO:0005840 ribosome;GO:0006412 translation;GO:0006412 translation;GO:0022626 cytosolic ribosome;GO:0022626 cytosolic ribosome;GO:0022626 cytosolic ribosome;GO:0005774 vacuolar membrane;GO:0005886 plasma membrane;GO:0022625 cytosolic large ribosomal subunit;GO:0005829 cytosol
Pp1s16_17V6	241	37	-2.46278		37	142	2.3207						7.2713	1.34887	4.7549	3.11291	PF00646					AT1G27340.1		Galactose oxidase/kelch repeat superfamily protein		GO:0003674 molecular_function;GO:0008150 biological_process
Pp1s22_79V6	297	62	-2.01947		62	235	2.30272						8.9609	2.26027	7.86902	5.51429	PF01474	PTHR21337				AT1G22410.1		Class-II DAHP synthetase family protein	Phenylalanine, tyrosine and tryptophan biosynthesis;Metabolic pathways;Biosynthesis of secondary metabolites	GO:0003849 3-deoxy-7-phosphoheptulonate synthase activity;GO:0016020 membrane;GO:0009073 aromatic amino acid family biosynthetic process
Pp1s64_220V6	233	44	-2.1641		44	162	2.26082						7.02993	1.60407	5.4246	2.07527	PF00155	PTHR11751	KOG0258	2.6.1.2	K00814	AT1G70580.2	AOAT2	alanine-2-oxoglutarate aminotransferase 2	Alanine, aspartate and glutamate metabolism;Carbon fixation in photosynthetic organisms;Metabolic pathways	GO:0004021 L-alanine:2-oxoglutarate aminotransferase activity;GO:0009853 photorespiration;GO:0005777 peroxisome;GO:0005777 peroxisome;GO:0005777 peroxisome;GO:0005777 peroxisome;GO:0004021 L-alanine:2-oxoglutarate aminotransferase activity;GO:0008453 alanine-glyoxylate transaminase activity;GO:0047958 glycine:2-oxoglutarate aminotransferase activity;GO:0005777 peroxisome;GO:0047958 glycine:2-oxog…
Pp1s16_358V6	462	58	-2.75311		58	210	2.23667						13.9392	2.11445	7.03189	2.66821	PF00213	PTHR11910	KOG1662			AT4G09650.1	ATPD	ATP synthase delta-subunit gene	Oxidative phosphorylation;Photosynthesis;Metabolic pathways	GO:0046933 "hydrogen ion transporting ATP synthase activity, rotational mechanism";GO:0009579 thylakoid;GO:0009941 chloroplast envelope;GO:0009772 photosynthetic electron transport in photosystem II;GO:0009773 photosynthetic electron transport in photosystem I;GO:0015979 photosynthesis;GO:0009535 chloroplast thylakoid membrane;GO:0009579 thylakoid;GO:0009507 chloroplast;GO:0009535 chloroplast thy…
Pp1s29_119V6	227	42	-2.19358		42	148	2.19754						6.8489	1.53115	4.95581	2.43103	PF00071,PF08477	PTHR11708	KOG0096		K07936	AT5G55190.1	RAN3	RAN GTPase 3	Ribosome biogenesis in eukaryotes;RNA transport	GO:0005525 GTP binding;GO:0005829 cytosol;GO:0003924 GTPase activity;GO:0005515 protein binding;GO:0005525 GTP binding;GO:0006606 protein import into nucleus
Pp1s6_398V6	715	88	-2.78171		88	310	2.1971						21.5725	3.20813	10.3804	5.63288		PTHR23283				AT2G01830.3	WOL	CHASE domain containing histidine kinase protein	Plant hormone signal transduction	GO:0004673 protein histidine kinase activity;GO:0016020 membrane;GO:0016020 membrane;GO:0016020 membrane;GO:0010086 embryonic root morphogenesis;GO:0000160 two-component signal transduction system (phosphorelay);GO:0009885 transmembrane histidine kinase cytokinin receptor activity;GO:0009736 cytokinin mediated signaling pathway;GO:0009884 cytokinin receptor activity;GO:0008272 sulfate transport;G…
Pp1s33_110V6	1085	183	-2.32712		183	644	2.19562						32.7359	6.67145	21.5645	4.53595	PF08267,PF01717		KOG2263	2.1.1.14	K00549	AT5G17920.2	ATMS1	Cobalamin-independent synthase family protein	Cysteine and methionine metabolism;Selenoamino acid metabolism;Metabolic pathways;Biosynthesis of secondary metabolites	GO:0003871 5-methyltetrahydropteroyltriglutamate-homocysteine S-methyltransferase activity;GO:0005829 cytosol;GO:0009086 methionine biosynthetic process;GO:0005829 cytosol;GO:0008705 methionine synthase activity;GO:0046686 response to cadmium ion;GO:0005507 copper ion binding;GO:0005774 vacuolar membrane;GO:0005774 vacuolar membrane;GO:0005886 plasma membrane;GO:0005886 plasma membrane;GO:0016020…
Pp1s184_69V6	490	79	-2.3922		79	277	2.19036						14.784	2.88003	9.2754	13.5189	PF02416				K03116	AT5G28750.1		Bacterial sec-independent translocation protein mttA/Hcf106	Protein export	GO:0008565 protein transporter activity;GO:0008565 protein transporter activity;GO:0009306 protein secretion;GO:0015031 protein transport;GO:0015031 protein transport;GO:0009941 chloroplast envelope;GO:0009535 chloroplast thylakoid membrane;GO:0009535 chloroplast thylakoid membrane
Pp1s450_21V6	575	103	-2.24026		103	360	2.18575						17.3485	3.75497	12.0547	5.78111	PF00490	PTHR11458	KOG2794	4.2.1.24	K01698	AT1G69740.1	HEMB1	Aldolase superfamily protein	Porphyrin and chlorophyll metabolism;Metabolic pathways;Biosynthesis of secondary metabolites	GO:0003824 catalytic activity;GO:0003824 catalytic activity;GO:0004655 porphobilinogen synthase activity;GO:0004655 porphobilinogen synthase activity;GO:0004655 porphobilinogen synthase activity;GO:0046872 metal ion binding;GO:0046872 metal ion binding;GO:0009507 chloroplast;GO:0009570 chloroplast stroma;GO:0009507 chloroplast;GO:0009507 chloroplast;GO:0009570 chloroplast stroma;GO:0006779 porphy…
Pp1s5_30V6	297	60	-2.06677		60	206	2.16001						8.9609	2.18736	6.89795	2.46068	PF01040	PTHR11048	KOG1381	2.5.1.62	K04040	AT3G51820.1	G4	UbiA prenyltransferase family protein	Porphyrin and chlorophyll metabolism;Metabolic pathways;Biosynthesis of secondary metabolites	GO:0015995 chlorophyll biosynthetic process;GO:0046408 chlorophyll synthetase activity;GO:0009507 chloroplast;GO:0009535 chloroplast thylakoid membrane
Pp1s32_202V6	321	62	-2.13158		62	210	2.14045						9.68501	2.26027	7.03189	2.2828	PF01165					AT3G27160.1	GHS1	Ribosomal protein S21 family protein		GO:0003735 structural constituent of ribosome;GO:0003735 structural constituent of ribosome;GO:0005840 ribosome;GO:0006412 translation;GO:0006412 translation;GO:0042254 ribosome biogenesis;GO:0009507 chloroplast
Pp1s131_72V6	306	42	-2.62441		42	133	2.04337						9.23244	1.53115	4.45353	6.55193	PF00450	PTHR11802	KOG1282	3.4.16.5	K13289	AT4G12910.1	scpl20	serine carboxypeptidase-like 20		GO:0004185 serine-type carboxypeptidase activity;GO:0004185 serine-type carboxypeptidase activity;GO:0006508 proteolysis;GO:0006508 proteolysis;GO:0005773 vacuole
Pp1s235_56V6	2	165	6.60698		165	518	2.03089						0.0603427	6.01525	17.3453	21.4939
Pp1s120_155V6	214	872	2.26737		872	161	-2.05687						6.45667	31.7897	5.39112	5.455
Pp1s23_172V6	67	268	2.24066		268	49	-2.07098						2.02148	9.77022	1.64077	2.19386	PF01764					AT3G61680.1		alpha/beta-Hydrolases superfamily protein		GO:0004806 triglyceride lipase activity;GO:0004806 triglyceride lipase activity;GO:0006629 lipid metabolic process;GO:0006629 lipid metabolic process;GO:0009507 chloroplast
Pp1s215_49V6	869	176	-2.06313		176	32	-2.07903						26.2189	6.41626	1.07153	1.3341	PF02825,PF12174	PTHR14453				AT1G32230.2	RCD1	WWE protein-protein interaction domain protein family		GO:0005515 protein binding;GO:0005634 nucleus;GO:0006979 response to oxidative stress;GO:0000303 response to superoxide;GO:0009723 response to ethylene stimulus;GO:0009816 "defense response to bacterium, incompatible interaction";GO:0009867 jasmonic acid mediated signaling pathway;GO:0009873 ethylene mediated signaling pathway;GO:0010193 response to ozone;GO:0042542 response to hydrogen peroxide;…
Pp1s6_369V6	0	204	36.8892		204	37	-2.08257						0	7.43703	1.23895	1.27481	PF00106	PTHR19410	KOG0725			AT1G54870.1		NAD(P)-binding Rossmann-fold superfamily protein		GO:0016491 oxidoreductase activity;GO:0008106 alcohol dehydrogenase (NADP+) activity;GO:0009507 chloroplast;GO:0055114 oxidation-reduction process
Pp1s97_25V6	45	168	2.14112		168	30	-2.10502						1.35771	6.12461	1.00456	0.266821	PF00533	PTHR23196:SF1				AT3G21480.1		BRCT domain-containing DNA repair protein		GO:0003674 molecular_function;GO:0005622 intracellular;GO:0008150 biological_process
Pp1s8_127V6	33	146	2.38609		146	26	-2.10898						0.995655	5.32258	0.870615	0.563288	PF00847					AT4G32800.1		Integrase-type DNA-binding superfamily protein		GO:0003677 DNA binding;GO:0003700 sequence-specific DNA binding transcription factor activity;GO:0005634 nucleus;GO:0006355 "regulation of transcription, DNA-dependent";GO:0006355 "regulation of transcription, DNA-dependent";GO:0003700 sequence-specific DNA binding transcription factor activity
Pp1s93_151V6	16	147	3.44033		147	26	-2.11883						0.482742	5.35904	0.870615	0.326114
Pp1s98_15V6	514	102	-2.09254		102	18	-2.1221						15.5081	3.71852	0.602733	0.711521	PF04921	PTHR12722	KOG2894		K13119	AT2G21150.1	XCT	XAP5 family protein		GO:0003674 molecular_function;GO:0005634 nucleus;GO:0009637 response to blue light;GO:0010099 regulation of photomorphogenesis;GO:0010114 response to red light;GO:0042752 regulation of circadian rhythm;GO:0009873 ethylene mediated signaling pathway
Pp1s41_113V6	0	115	36.0623		115	20	-2.14316						0	4.19244	0.669704	0.770815
Pp1s31_237V6	20	234	3.78909		234	40	-2.16803						0.603427	8.53071	1.33941	1.36375	PF01764					AT3G07400.1		lipase class 3 family protein		GO:0004806 triglyceride lipase activity;GO:0004806 triglyceride lipase activity;GO:0006629 lipid metabolic process;GO:0006629 lipid metabolic process
Pp1s42_251V6	6847	23375	2.01208		23375	3948	-2.18537						206.583	852.16	132.2	409.273	PF00076	PTHR10432	KOG0107			AT4G39260.3	CCR1	cold, circadian rhythm, and RNA binding 1		GO:0000166 nucleotide binding;GO:0000166 nucleotide binding;GO:0000166 nucleotide binding;GO:0000166 nucleotide binding;GO:0003676 nucleic acid binding;GO:0003676 nucleic acid binding;GO:0003676 nucleic acid binding;GO:0003676 nucleic acid binding;GO:0003723 RNA binding;GO:0009507 chloroplast;GO:0009507 chloroplast;GO:0009507 chloroplast;GO:0009507 chloroplast;GO:0005730 nucleolus;GO:0005730 nucl…
Pp1s50_176V6	2	245	7.17729		245	41	-2.19868						0.0603427	8.93173	1.37289	0.830108	PF03171	PTHR10209	KOG0143			AT4G21200.1	GA2OX8	gibberellin 2-oxidase 8		GO:0005575 cellular_component;GO:0009685 gibberellin metabolic process;GO:0052634 C-19 gibberellin 2-beta-dioxygenase activity;GO:0052635 C-20 gibberellin 2-beta-dioxygenase activity
Pp1s321_14V6	246	1021	2.29391		1021	168	-2.22305						7.42216	37.2216	5.62551	4.59524
Pp1s10_253V6	1535	123	-3.40085		123	20	-2.24018						46.313	4.48409	0.669704	0.503994	PF00717,PF10502	PTHR12383	KOG0171			AT3G24590.1	PLSP1	plastidic type i signal peptidase 1	Protein export	GO:0006508 proteolysis;GO:0008233 peptidase activity;GO:0016020 membrane;GO:0009507 chloroplast;GO:0009535 chloroplast thylakoid membrane;GO:0009535 chloroplast thylakoid membrane;GO:0008233 peptidase activity;GO:0009526 plastid envelope;GO:0009535 chloroplast thylakoid membrane;GO:0010027 thylakoid membrane organization;GO:0009507 chloroplast;GO:0010027 thylakoid membrane organization;GO:0051604…
Pp1s11_387V6	56	499	3.3962		499	81	-2.24264						1.6896	18.1916	2.7123	5.75146	PF05694	PTHR23300	KOG0918			AT4G14040.1	SBP2	selenium-binding protein 2		GO:0005575 cellular_component;GO:0008430 selenium binding;GO:0008430 selenium binding;GO:0010197 polar nucleus fusion
Pp1s540_10V6	62	230	2.13195		230	37	-2.25563						1.87062	8.38489	1.23895	0.978342	PF01417	PTHR12276	KOG2056			AT3G46540.1		ENTH/VHS family protein		GO:0005488 binding;GO:0005575 cellular_component;GO:0008150 biological_process
Pp1s133_26V6	54	202	2.14398		202	32	-2.27781						1.62925	7.36412	1.07153	0.592934	PF01302,PF00560	PTHR15140	KOG3207			AT1G71440.1	PFI	tubulin folding cofactor E / Pfifferling (PFI)		GO:0009793 embryo development ending in seed dormancy;GO:0000910 cytokinesis;GO:0007021 tubulin complex assembly;GO:0009507 chloroplast
Pp1s60_54V6	8	122	4.17139		122	19	-2.30241						0.241371	4.44764	0.636219	0.533641	PF02987	PTHR23241	KOG2886			AT3G62580.1		Late embryogenesis abundant protein (LEA) family protein		GO:0003674 molecular_function;GO:0008150 biological_process;GO:0012505 endomembrane system
Pp1s71_115V6	27	105	2.20001		105	16	-2.33384						0.814627	3.82788	0.535763	1.15622	PF00646					AT5G15710.1		Galactose oxidase/kelch repeat superfamily protein		GO:0003674 molecular_function;GO:0008150 biological_process
Pp1s25_161V6	10	130	3.9411		130	19	-2.39404						0.301714	4.73928	0.636219	0.652228
Pp1s155_57V6	40	140	2.04801		140	20	-2.42695						1.20685	5.10385	0.669704	0.622581
Pp1s111_58V6	30	158	2.63755		158	22	-2.46395						0.905141	5.76005	0.736674	0.503994	PF03407	PTHR10483				AT1G14590.1		Nucleotide-diphospho-sugar transferase family protein		GO:0003674 molecular_function;GO:0008150 biological_process;GO:0009543 chloroplast thylakoid lumen
Pp1s318_13V6	1829	282	-2.45663		282	39	-2.47375						55.1834	10.2806	1.30592	3.64655	PF08447,PF00989	PTHR23244:SF1				AT2G02710.2	PLPB	PAS/LOV protein B		GO:0000155 two-component sensor activity;GO:0000160 two-component signal transduction system (phosphorelay);GO:0004871 signal transducer activity;GO:0006355 "regulation of transcription, DNA-dependent";GO:0007165 signal transduction
Pp1s149_49V6	4	579	7.41808		579	79	-2.49324						0.120685	21.108	2.64533	0.355761
Pp1s271_60V6	10	119	3.81355		119	16	-2.51442						0.301714	4.33827	0.535763	2.19386						AT5G15710.1		Galactose oxidase/kelch repeat superfamily protein		GO:0003674 molecular_function;GO:0008150 biological_process
Pp1s36_353V6	50	277	2.71054		277	36	-2.56341						1.50857	10.0983	1.20547	1.09693		PTHR12461:SF3				AT3G20810.2		2-oxoglutarate (2OG) and Fe(II)-dependent oxygenase superfamily protein		GO:0003700 sequence-specific DNA binding transcription factor activity;GO:0005575 cellular_component;GO:0007623 circadian rhythm;GO:0042752 regulation of circadian rhythm
Pp1s35_262V6	58	770	3.97139		770	100	-2.56446						1.74994	28.0711	3.34852	0.800462	PF01135	PTHR11579	KOG1661			AT5G50240.1	PIMT2	protein-l-isoaspartate methyltransferase 2		GO:0004719 protein-L-isoaspartate (D-aspartate) O-methyltransferase activity;GO:0006464 protein modification process;GO:0006464 protein modification process;GO:0006464 protein modification process;GO:0006464 protein modification process;GO:0005634 nucleus;GO:0004719 protein-L-isoaspartate (D-aspartate) O-methyltransferase activity
Pp1s104_58V6	715	140	-2.11186		140	18	-2.57896						21.5725	5.10385	0.602733	1.92704	PF02362					AT3G24650.1	ABI3	AP2/B3-like transcriptional factor family protein		GO:0003677 DNA binding;GO:0045893 "positive regulation of transcription, DNA-dependent";GO:0009657 plastid organization;GO:0005515 protein binding;GO:0005515 protein binding;GO:0005515 protein binding;GO:0005515 protein binding;GO:0009790 embryo development;GO:0003700 sequence-specific DNA binding transcription factor activity;GO:0006355 "regulation of transcription, DNA-dependent";GO:0003700 seq…
Pp1s68_134V6	24	133	2.71098		133	17	-2.58742						0.724113	4.84865	0.569248	0.503994	PF02714	PTHR13018				AT4G02900.1		ERD (early-responsive to dehydration stress) family protein		GO:0008150 biological_process
Pp1s211_95V6	4	540	7.31747		540	68	-2.60895						0.120685	19.6863	2.27699	2.49032	PF08256
Pp1s23_225V6	28	144	2.60323		144	18	-2.6196						0.844798	5.24967	0.602733	1.71951	PF01253	PTHR10388	KOG1770		K03113	AT5G54760.3		Translation initiation factor SUI1 family protein		GO:0003743 translation initiation factor activity;GO:0003743 translation initiation factor activity;GO:0003743 translation initiation factor activity;GO:0003743 translation initiation factor activity;GO:0006412 translation;GO:0006412 translation;GO:0006412 translation;GO:0006413 translational initiation;GO:0006413 translational initiation;GO:0006413 translational initiation;GO:0006413 translation…
Pp1s237_29V6	372	1585	2.33176		1585	197	-2.62781						11.2237	57.7828	6.59658	7.97497	PF00171	PTHR11699	KOG2453	1.2.1.3,1.2.1.31,1.2.1.8	K14085	AT1G54100.1	ALDH7B4	aldehyde dehydrogenase 7B4	Glycolysis / Gluconeogenesis;Ascorbate and aldarate metabolism;Fatty acid metabolism;Glycine, serine and threonine metabolism;Valine, leucine and isoleucine degradation;Lysine biosynthesis;Lysine degradation;Arginine and proline metabolism;Histidine metabolism;Tryptophan metabolism;beta-Alanine metabolism;Glycerolipid metabolism;Pyruvate metabolism;Propanoate metabolism;Metabolic pathways;Biosynt…	GO:0004028 3-chloroallyl aldehyde dehydrogenase activity;GO:0016491 oxidoreductase activity;GO:0016491 oxidoreductase activity;GO:0009269 response to desiccation;GO:0009651 response to salt stress;GO:0009737 response to abscisic acid stimulus;GO:0005829 cytosol;GO:0005829 cytosol
Pp1s122_142V6	140	532	2.16666		532	66	-2.63049						4.22399	19.3946	2.21002	1.12658
Pp1s398_23V6	105	1047	3.55846		1047	128	-2.65164						3.16799	38.1695	4.2861	1.66022						AT1G27990.1				GO:0003674 molecular_function;GO:0005575 cellular_component;GO:0008150 biological_process
Pp1s105_45V6	37	164	2.38875		164	20	-2.65522						1.11634	5.97879	0.669704	2.37174			KOG4830			AT2G44280.1		Major facilitator superfamily protein		GO:0003674 molecular_function;GO:0005575 cellular_component;GO:0008150 biological_process
Pp1s198_7V6	15	452	5.15394		452	53	-2.71186						0.45257	16.4781	1.77471	1.98633	PF00067	PTHR19383	KOG0156	1.14.-.-	K00517	AT5G07990.1	TT7	Cytochrome P450 superfamily protein	Flavonoid biosynthesis;Flavone and flavonol biosynthesis;Metabolic pathways;Biosynthesis of secondary metabolites	GO:0016711 flavonoid 3'-monooxygenase activity;GO:0019825 oxygen binding;GO:0009411 response to UV;GO:0009813 flavonoid biosynthetic process;GO:0016711 flavonoid 3'-monooxygenase activity;GO:0009733 response to auxin stimulus
Pp1s383_6V6	15	181	3.83361		181	21	-2.72713						0.45257	6.59854	0.703189	0.296467		PTHR23241
Pp1s98_26V6	10	130	3.9411		130	15	-2.73507						0.301714	4.73928	0.502278	0		PTHR19959:SF16				AT5G02130.1	NDP1	Tetratricopeptide repeat (TPR)-like superfamily protein		GO:0005488 binding;GO:0005575 cellular_component;GO:0008150 biological_process
Pp1s49_282V6	67	227	2.00111		227	26	-2.74571						2.02148	8.27552	0.870615	2.2828						AT1G52720.1				GO:0003674 molecular_function;GO:0008150 biological_process
Pp1s224_131V6	13	114	3.37311		114	13	-2.75205						0.392228	4.15599	0.435307	0.148234
Pp1s341_28V6	1711	285	-2.34515		285	32	-2.77442						51.6232	10.39	1.07153	2.01598	PF02825,PF12174					AT1G32230.1	RCD1	WWE protein-protein interaction domain protein family		GO:0005515 protein binding;GO:0005634 nucleus;GO:0006979 response to oxidative stress;GO:0000303 response to superoxide;GO:0009723 response to ethylene stimulus;GO:0009816 "defense response to bacterium, incompatible interaction";GO:0009867 jasmonic acid mediated signaling pathway;GO:0009873 ethylene mediated signaling pathway;GO:0010193 response to ozone;GO:0042542 response to hydrogen peroxide;…
Pp1s197_40V6	23	170	3.12648		170	19	-2.78106						0.693941	6.19753	0.636219	0.474348	PF03737					AT5G56260.1		Ribonuclease E inhibitor RraA/Dimethylmenaquinone methyltransferase		GO:0005575 cellular_component;GO:0008428 ribonuclease inhibitor activity;GO:0051252 regulation of RNA metabolic process
Pp1s97_9V6	30	118	2.21641		118	13	-2.8018						0.905141	4.30181	0.435307	0.326114
Pp1s8_46V6	138	828	2.82562		828	89	-2.83735						4.16365	30.1856	2.98018	1.66022	PF02574	PTHR21091	KOG1579	2.1.1.10	K00547	AT3G63250.1	HMT2	homocysteine methyltransferase 2	Cysteine and methionine metabolism;Metabolic pathways;Biosynthesis of secondary metabolites	GO:0008898 homocysteine S-methyltransferase activity;GO:0012505 endomembrane system;GO:0008898 homocysteine S-methyltransferase activity;GO:0009086 methionine biosynthetic process;GO:0033528 S-methylmethionine cycle
Pp1s376_34V6	3103	647	-2.02117		647	67	-2.89113						93.6217	23.5871	2.24351	0.978342						AT5G19900.1		PRLI-interacting factor, putative		GO:0003674 molecular_function;GO:0008150 biological_process
Pp1s67_175V6	213	2188	3.60134		2188	226	-2.89482						6.4265	79.7658	7.56765	13.5189	PF07853
Pp1s12_269V6	42	165	2.21466		165	16	-2.98592						1.2672	6.01525	0.535763	0.444701	PF00439	PTHR22880				AT2G34900.1	IMB1	Transcription factor GTE6		GO:0003677 DNA binding;GO:0005634 nucleus;GO:0010030 positive regulation of seed germination;GO:0045893 "positive regulation of transcription, DNA-dependent"
Pp1s19_224V6	4	104	4.9411		104	10	-2.99811						0.120685	3.79143	0.334852	0.17788	PF04508					AT1G50660.1				GO:0008150 biological_process;GO:0009507 chloroplast
Pp1s163_69V6	30	105	2.04801		105	10	-3.01192						0.905141	3.82788	0.334852	0
Pp1s67_169V6	756	126	-2.34431		126	12	-3.01192						22.8096	4.59346	0.401822	0.533641	PF00168,PF02893	PTHR23319	KOG1032			AT1G03370.1		C2 calcium/lipid-binding and GRAM domain containing protein		GO:0008150 biological_process
Pp1s6_180V6	37	140	2.16049		140	13	-3.04844						1.11634	5.10385	0.435307	0.17788	PF00171	PTHR11699	KOG2451	1.2.1.16	K00135	AT1G79440.1	ALDH5F1	aldehyde dehydrogenase 5F1	Alanine, aspartate and glutamate metabolism;Tyrosine metabolism;Butanoate metabolism;Metabolic pathways	GO:0004028 3-chloroallyl aldehyde dehydrogenase activity;GO:0004777 succinate-semialdehyde dehydrogenase activity;GO:0004777 succinate-semialdehyde dehydrogenase activity;GO:0005759 mitochondrial matrix;GO:0006540 glutamate decarboxylation to succinate;GO:0009450 gamma-aminobutyric acid catabolic process;GO:0051287 NAD or NADH binding;GO:0005739 mitochondrion;GO:0006950 response to stress;GO:0009…
Pp1s206_53V6	5	227	5.74528		227	21	-3.05383						0.150857	8.27552	0.703189	2.37174	PF00924					AT4G00290.1		Mechanosensitive ion channel protein		GO:0016020 membrane;GO:0055085 transmembrane transport;GO:0009941 chloroplast envelope;GO:0009507 chloroplast
Pp1s284_27V6	6	652	7.00442		652	59	-3.08568						0.181028	23.7693	1.97563	1.3934						AT3G03341.1
Pp1s163_16V6	21	100	2.49219		100	9	-3.09353						0.633599	3.6456	0.301367	0.681875	PF08263,PF00560,PF00069,PF07714	PTHR23258	KOG1187			AT1G06840.1		Leucine-rich repeat protein kinase family protein		GO:0004672 protein kinase activity;GO:0004674 protein serine/threonine kinase activity;GO:0004674 protein serine/threonine kinase activity;GO:0005524 ATP binding;GO:0005524 ATP binding;GO:0006468 protein phosphorylation;GO:0007169 transmembrane receptor protein tyrosine kinase signaling pathway;GO:0005886 plasma membrane;GO:0005886 plasma membrane;GO:0016020 membrane
Pp1s190_85V6	29	100	2.02653		100	9	-3.09353						0.87497	3.6456	0.301367	0.237174	PF01138,PF03725	PTHR11953	KOG1069		K12590	AT3G46210.3		Ribosomal protein S5 domain 2-like superfamily protein	RNA degradation	GO:0000175 3'-5'-exoribonuclease activity;GO:0000175 3'-5'-exoribonuclease activity;GO:0000175 3'-5'-exoribonuclease activity;GO:0000175 3'-5'-exoribonuclease activity;GO:0000175 3'-5'-exoribonuclease activity;GO:0000175 3'-5'-exoribonuclease activity;GO:0000175 3'-5'-exoribonuclease activity;GO:0003723 RNA binding;GO:0003723 RNA binding;GO:0003723 RNA binding;GO:0003723 RNA binding;GO:0003723 RN…
Pp1s64_41V6	51	201	2.21928		201	18	-3.10072						1.53874	7.32766	0.602733	0.563288		PTHR10366				AT5G02240.1		NAD(P)-binding Rossmann-fold superfamily protein		GO:0003824 catalytic activity;GO:0003854 3-beta-hydroxy-delta5-steroid dehydrogenase activity;GO:0005488 binding;GO:0005774 vacuolar membrane;GO:0005886 plasma membrane;GO:0048046 apoplast;GO:0009737 response to abscisic acid stimulus;GO:0005829 cytosol
Pp1s34_343V6	39	136	2.04272		136	12	-3.1221						1.17668	4.95802	0.401822	0.711521	PF09465,PF02178					AT3G58090.1		Disease resistance-responsive (dirigent-like protein) family protein		GO:0003674 molecular_function;GO:0005575 cellular_component;GO:0008150 biological_process
Pp1s120_13V6	11	352	5.24066		352	31	-3.12483						0.331885	12.8325	1.03804	1.48234	PF00847					AT1G75490.1		Integrase-type DNA-binding superfamily protein		GO:0003677 DNA binding;GO:0003700 sequence-specific DNA binding transcription factor activity;GO:0005634 nucleus;GO:0006355 "regulation of transcription, DNA-dependent";GO:0003700 sequence-specific DNA binding transcription factor activity;GO:0010200 response to chitin
Pp1s263_45V6	36	540	4.14755		540	46	-3.17285						1.08617	19.6863	1.54032	2.10492	PF00036	PTHR10891	KOG0027		K13448	AT1G24620.1		EF hand calcium-binding protein family	Plant-pathogen interaction	GO:0005509 calcium ion binding;GO:0005509 calcium ion binding;GO:0005634 nucleus;GO:0009409 response to cold;GO:0005737 cytoplasm;GO:0048767 root hair elongation
Pp1s370_59V6	65	386	2.81074		386	31	-3.25786						1.96114	14.072	1.03804	1.09693	PF00378	PTHR11941	KOG1684	3.1.2.4	K05605	AT5G65940.1	CHY1	beta-hydroxyisobutyryl-CoA hydrolase 1	Valine, leucine and isoleucine degradation;beta-Alanine metabolism;Propanoate metabolism;Metabolic pathways	GO:0003860 3-hydroxyisobutyryl-CoA hydrolase activity;GO:0006574 valine catabolic process;GO:0006635 fatty acid beta-oxidation;GO:0009733 response to auxin stimulus;GO:0009409 response to cold
Pp1s57_24V6	52	1178	4.74234		1178	94	-3.26713						1.56891	42.9452	3.14761	0.889402	PF00403	PTHR22814	KOG1603			AT1G06330.1		Heavy metal transport/detoxification superfamily protein		GO:0005507 copper ion binding;GO:0005575 cellular_component;GO:0006825 copper ion transport;GO:0030001 metal ion transport;GO:0046872 metal ion binding
Pp1s70_278V6	27	179	2.96958		179	14	-3.29606						0.814627	6.52563	0.468793	0.622581	PF06203					AT5G41380.1		CCT motif family protein		GO:0003674 molecular_function;GO:0008150 biological_process
Pp1s1_230V6	35	141	2.25092		141	11	-3.29972						1.056	5.1403	0.368337	1.89739	PF08534,PF00578	PTHR10430	KOG0541			AT3G52960.1		Thioredoxin superfamily protein		GO:0016209 antioxidant activity;GO:0016491 oxidoreductase activity;GO:0009579 thylakoid;GO:0009507 chloroplast;GO:0005515 protein binding;GO:0009570 chloroplast stroma;GO:0009579 thylakoid;GO:0042742 defense response to bacterium;GO:0009505 plant-type cell wall;GO:0009507 chloroplast;GO:0009570 chloroplast stroma
Pp1s86_63V6	48	207	2.34918		207	16	-3.31308						1.44823	7.5464	0.535763	1.68986	PF00079	PTHR11461	KOG2392			AT1G47710.1		Serine protease inhibitor (SERPIN) family protein		GO:0004867 serine-type endopeptidase inhibitor activity;GO:0004867 serine-type endopeptidase inhibitor activity;GO:0008150 biological_process;GO:0010951 negative regulation of endopeptidase activity;GO:0030162 regulation of proteolysis;GO:0004869 cysteine-type endopeptidase inhibitor activity;GO:0048046 apoplast
Pp1s4_134V6	15742	1993	-2.74095		1993	147	-3.38065						474.958	72.6569	4.92232	4.29877	PF01253	PTHR10388	KOG1770		K03113	AT1G54290.1		Translation initiation factor SUI1 family protein	RNA transport	GO:0003743 translation initiation factor activity;GO:0003743 translation initiation factor activity;GO:0006412 translation;GO:0006413 translational initiation;GO:0006413 translational initiation
Pp1s134_56V6	7	192	5.01826		192	14	-3.39721						0.2112	6.99956	0.468793	0.0592934	PF00581		KOG1530
Pp1s77_22V6	17	109	2.92138		109	7	-3.58043						0.512913	3.97371	0.234396	0.326114	PF00067	PTHR19383	KOG0157			AT4G13310.1	CYP71A20	cytochrome P450, family 71, subfamily A, polypeptide 20	Limonene and pinene degradation;Stilbenoid, diarylheptanoid and gingerol biosynthesis;Metabolic pathways;Biosynthesis of secondary metabolites	GO:0004497 monooxygenase activity;GO:0004497 monooxygenase activity;GO:0005506 iron ion binding;GO:0005506 iron ion binding;GO:0009055 electron carrier activity;GO:0009055 electron carrier activity;GO:0019825 oxygen binding;GO:0020037 heme binding;GO:0020037 heme binding;GO:0055114 oxidation-reduction process;GO:0055114 oxidation-reduction process
Pp1s29_142V6	23	142	2.86684		142	9	-3.59942						0.693941	5.17676	0.301367	1.45269	PF00753	PTHR11935	KOG0814			AT1G53580.1	GLY3	glyoxalase II 3		GO:0004416 hydroxyacylglutathione hydrolase activity;GO:0019243 methylglyoxal catabolic process to D-lactate;GO:0009651 response to salt stress;GO:0009651 response to salt stress;GO:0016788 "hydrolase activity, acting on ester bonds";GO:0047951 glutathione thiolesterase activity
Pp1s238_73V6	0	262	37.2502		262	15	-3.74613						0	9.55148	0.502278	0.237174
Pp1s168_73V6	27	257	3.49139		257	14	-3.81787						0.814627	9.3692	0.468793	1.27481	PF04927					AT3G22490.1		Seed maturation protein		GO:0003674 molecular_function;GO:0005575 cellular_component;GO:0009793 embryo development ending in seed dormancy
Pp1s169_45V6	21	147	3.04801		147	8	-3.81927						0.633599	5.35904	0.267882	0.237174	PF06911	PTHR21068				AT4G35985.1		Senescence/dehydration-associated protein-related
Pp1s298_75V6	13	197	4.16227		197	10	-3.91972						0.392228	7.18184	0.334852	0	PF11204,PF04749					AT5G05350.1		PLAC8 family protein		GO:0003674 molecular_function;GO:0008150 biological_process;GO:0009507 chloroplast
Pp1s180_52V6	53	520	3.5351		520	24	-4.057						1.59908	18.9571	0.803645	2.51997						AT2G13840.1		Polymerase/histidinol phosphatase-like		GO:0003677 DNA binding;GO:0003677 DNA binding;GO:0003824 catalytic activity;GO:0003887 DNA-directed DNA polymerase activity;GO:0003887 DNA-directed DNA polymerase activity;GO:0005575 cellular_component;GO:0006260 DNA replication;GO:0006260 DNA replication
Pp1s104_29V6	0	113	36.037		113	5	-4.11785						0	4.11953	0.167426	0.237174	PF03357	PTHR10476	KOG3229		K12193	AT5G22950.1	VPS24.1	SNF7 family protein	Endocytosis	GO:0016192 vesicle-mediated transport;GO:0000815 ESCRT III complex
Pp1s421_9V6	2	773	8.83498		773	34	-4.12646						0.0603427	28.1805	1.1385	1.7788	PF00257					AT1G20440.1	COR47	cold-regulated 47		GO:0003674 molecular_function;GO:0006950 response to stress;GO:0009415 response to water;GO:0009737 response to abscisic acid stimulus;GO:0006970 response to osmotic stress;GO:0009414 response to water deprivation;GO:0009631 cold acclimation;GO:0009409 response to cold;GO:0010286 heat acclimation;GO:0009631 cold acclimation;GO:0050832 defense response to fungus;GO:0005829 cytosol;GO:0009409 respo…
Pp1s295_29V6	4	114	5.07355		114	5	-4.13056						0.120685	4.15599	0.167426	0
Pp1s15_186V6	663	114	-2.29932		114	5	-4.13056						20.0036	4.15599	0.167426	0.0592934	PF00847				K09286	AT4G32800.1		Integrase-type DNA-binding superfamily protein		GO:0003677 DNA binding;GO:0003700 sequence-specific DNA binding transcription factor activity;GO:0005634 nucleus;GO:0006355 "regulation of transcription, DNA-dependent";GO:0006355 "regulation of transcription, DNA-dependent";GO:0003700 sequence-specific DNA binding transcription factor activity
Pp1s302_43V6	15	115	3.17926		115	5	-4.14316						0.45257	4.19244	0.167426	0.533641	PF08323,PF00534	PTHR12526				AT4G18240.1	SS4	starch synthase 4		GO:0016757 "transferase activity, transferring glycosyl groups";GO:0016757 "transferase activity, transferring glycosyl groups";GO:0009507 chloroplast;GO:0005982 starch metabolic process;GO:0009507 chloroplast
Pp1s137_152V6	25	240	3.50369		240	10	-4.20456						0.754284	8.74945	0.334852	0.652228	PF00415	PTHR22870				AT3G53830.1		Regulator of chromosome condensation (RCC1) family protein		GO:0003682 chromatin binding;GO:0005575 cellular_component;GO:0008150 biological_process;GO:0008536 Ran GTPase binding
Pp1s40_9V6	21	846	5.57285		846	34	-4.25665						0.633599	30.8418	1.1385	0.474348	PF01274	PTHR21631	KOG1261	2.3.3.9	K01638	AT5G03860.2	MLS	malate synthase	Pyruvate metabolism;Glyoxylate and dicarboxylate metabolism;Metabolic pathways	GO:0006097 glyoxylate cycle;GO:0006097 glyoxylate cycle;GO:0004474 malate synthase activity
Pp1s235_78V6	14	101	3.09151		101	4	-4.27781						0.422399	3.68206	0.133941	1.06728	PF00168	PTHR22949:SF1				AT5G23950.1		Calcium-dependent lipid-binding (CaLB domain) family protein		GO:0003674 molecular_function;GO:0005575 cellular_component;GO:0008150 biological_process
Pp1s32_194V6	3	127	5.64438		127	5	-4.28635						0.0905141	4.62992	0.167426	0.681875	PF06203					AT5G14370.1		CCT motif family protein		GO:0009507 chloroplast
Pp1s121_15V6	0	155	36.4929		155	6	-4.31076						0	5.65069	0.200911	0.415054						AT1G52855.1				GO:0003674 molecular_function;GO:0003674 molecular_function;GO:0005575 cellular_component;GO:0008150 biological_process
Pp1s102_20V6	0	287	37.3817		287	11	-4.32507						0	10.4629	0.368337	0.355761	PF01212	PTHR10289	KOG1368	4.1.2.5	K01620	AT3G04520.1	THA2	threonine aldolase 2	Glycine, serine and threonine metabolism;Metabolic pathways;Biosynthesis of secondary metabolites	GO:0004793 threonine aldolase activity;GO:0005575 cellular_component;GO:0004793 threonine aldolase activity;GO:0006567 threonine catabolic process
Pp1s180_121V6	57	252	2.38505		252	9	-4.42695						1.71977	9.18692	0.301367	2.40138
Pp1s53_226V6	44	169	2.1821		169	6	-4.43551						1.32754	6.16107	0.200911	0.118587	PF10294	PTHR23109	KOG2793			AT5G27400.1		S-adenosyl-L-methionine-dependent methyltransferases superfamily protein		GO:0003674 molecular_function;GO:0008150 biological_process;GO:0005829 cytosol
Pp1s51_46V6	56	367	2.95294		367	13	-4.43879						1.6896	13.3794	0.435307	0.326114
Pp1s55_253V6	60	227	2.16031		227	8	-4.44615						1.81028	8.27552	0.267882	0.830108	PF00847					AT5G11590.1	TINY2	Integrase-type DNA-binding superfamily protein		GO:0003677 DNA binding;GO:0003700 sequence-specific DNA binding transcription factor activity;GO:0005634 nucleus;GO:0006355 "regulation of transcription, DNA-dependent";GO:0006355 "regulation of transcription, DNA-dependent";GO:0003700 sequence-specific DNA binding transcription factor activity
Pp1s146_82V6	86	466	2.67858		466	16	-4.48378						2.59474	16.9885	0.535763	0.681875	PF06749					AT1G61065.1		Protein of unknown function (DUF1218)		GO:0003674 molecular_function;GO:0008150 biological_process;GO:0012505 endomembrane system
Pp1s194_189V6	54	307	2.74786		307	10	-4.55976						1.62925	11.192	0.334852	0.415054	PF00560	PTHR10588				AT4G03260.2		Outer arm dynein light chain 1 protein		GO:0004674 protein serine/threonine kinase activity;GO:0046777 protein autophosphorylation
Pp1s171_10V6	22	194	3.38114		194	6	-4.63455						0.66377	7.07247	0.200911	0	PF04117	PTHR11266	KOG1944			AT1G52870.2		Peroxisomal membrane 22 kDa (Mpv17/PMP22) family protein		GO:0003674 molecular_function;GO:0008150 biological_process;GO:0009507 chloroplast;GO:0009507 chloroplast;GO:0016021 integral to membrane;GO:0016021 integral to membrane
Pp1s90_196V6	4	197	5.86271		197	6	-4.65669						0.120685	7.18184	0.200911	2.63856	PF06884					AT1G05510.1		Protein of unknown function (DUF1264)		GO:0003674 molecular_function;GO:0005575 cellular_component;GO:0009737 response to abscisic acid stimulus
Pp1s126_82V6	33	135	2.27308		135	4	-4.69641						0.995655	4.92156	0.133941	0.17788	PF00202	PTHR11986	KOG1402	2.6.1.13	K00819	AT5G46180.1	DELTA-OAT	ornithine-delta-aminotransferase	Arginine and proline metabolism;Metabolic pathways;Biosynthesis of secondary metabolites	GO:0004587 ornithine-oxo-acid transaminase activity;GO:0004587 ornithine-oxo-acid transaminase activity;GO:0005739 mitochondrion;GO:0006561 proline biosynthetic process;GO:0006593 ornithine catabolic process;GO:0019544 arginine catabolic process to glutamate;GO:0008270 zinc ion binding;GO:0004587 ornithine-oxo-acid transaminase activity;GO:0006561 proline biosynthetic process;GO:0042538 hyperosmo…
Pp1s145_135V6	7	136	4.52076		136	4	-4.70706						0.2112	4.95802	0.133941	0.503994	PF03070	PTHR20858				AT3G16990.1		Haem oxygenase-like, multi-helical		GO:0003674 molecular_function;GO:0005575 cellular_component
Pp1s263_60V6	41	214	2.62457		214	6	-4.7761						1.23703	7.80159	0.200911	1.68986	PF00892					AT3G45870.1		nodulin MtN21 /EamA-like transporter family protein		GO:0016020 membrane
Pp1s84_154V6	26	109	2.3084		109	3	-4.80282						0.784455	3.97371	0.100456	0.266821						AT3G12650.1				GO:0003674 molecular_function;GO:0008150 biological_process;GO:0005739 mitochondrion
Pp1s7_339V6	23	154	2.98388		154	4	-4.88638						0.693941	5.61423	0.133941	2.07527						AT1G16730.1	UP6	unknown protein 6		GO:0003674 molecular_function;GO:0008150 biological_process;GO:0005777 peroxisome
Pp1s335_58V6	8	695	6.68152		695	17	-4.973						0.241371	25.3369	0.569248	1.06728						AT1G49000.1				GO:0003674 molecular_function;GO:0008150 biological_process;GO:0009507 chloroplast
Pp1s10_408V6	6	250	5.62148		250	6	-5.00042						0.181028	9.11401	0.200911	0.503994	PF00415	PTHR22870				AT3G55580.1		Regulator of chromosome condensation (RCC1) family protein		GO:0005488 binding;GO:0005575 cellular_component;GO:0008150 biological_process
Pp1s142_79V6	72	271	2.15288		271	6	-5.11678						2.17234	9.87959	0.200911	1.27481	PF03714,PF02922,PF11852	PTHR10357	KOG0470			AT5G04360.1	LDA	limit dextrinase		GO:0004556 alpha-amylase activity;GO:0005975 carbohydrate metabolic process;GO:0009507 chloroplast;GO:0010303 limit dextrinase activity;GO:0005983 starch catabolic process;GO:0009507 chloroplast;GO:0005983 starch catabolic process;GO:0019252 starch biosynthetic process;GO:0051060 pullulanase activity;GO:0005983 starch catabolic process
Pp1s187_20V6	93	924	3.55325		924	20	-5.14942						2.80594	33.6854	0.669704	1.7788
Pp1s119_27V6	11	560	5.91051		560	11	-5.28945						0.331885	20.4154	0.368337	1.60092	PF05512					AT1G04560.1		AWPM-19-like family protein		GO:0003674 molecular_function;GO:0008150 biological_process;GO:0012505 endomembrane system
Pp1s22_107V6	5	378	6.48097		378	7	-5.37449						0.150857	13.7804	0.234396	0.355761						AT2G21820.1				GO:0003674 molecular_function;GO:0005575 cellular_component;GO:0008150 biological_process
Pp1s270_82V6	44	405	3.443		405	7	-5.47402						1.32754	14.7647	0.234396	0.296467	PF00005,PF01061	PTHR19241	KOG0061			AT1G31770.1	ABCG14	ATP-binding cassette 14		GO:0042626 "ATPase activity, coupled to transmembrane movement of substances"
Pp1s395_40V6	0	116	36.0748		116	2	-5.47758						0	4.2289	0.0669704	0		PTHR11932:SF6				AT4G02570.1	CUL1	cullin 1		GO:0007049 cell cycle;GO:0000151 ubiquitin ligase complex;GO:0009733 response to auxin stimulus;GO:0009793 embryo development ending in seed dormancy;GO:0005634 nucleus;GO:0005819 spindle;GO:0009524 phragmoplast;GO:0000794 condensed nuclear chromosome;GO:0005737 cytoplasm;GO:0005515 protein binding;GO:0005515 protein binding;GO:0005515 protein binding;GO:0005515 protein binding;GO:0005515 protein…
Pp1s142_10V6	110	705	2.92078		705	12	-5.49611						3.31885	25.7015	0.401822	1.95668	PF03619	PTHR23423	KOG2641			AT1G77220.1		Protein of unknown function (DUF300)		GO:0008150 biological_process
Pp1s276_11V6	26	118	2.42286		118	2	-5.50224						0.784455	4.30181	0.0669704	0.681875	PF07823					AT4G18930.1		RNA ligase/cyclic nucleotide phosphodiesterase family protein		GO:0004112 cyclic-nucleotide phosphodiesterase activity;GO:0005737 cytoplasm;GO:0006388 "tRNA splicing, via endonucleolytic cleavage and ligation"
Pp1s350_17V6	42	179	2.33215		179	3	-5.51845						1.2672	6.52563	0.100456	0.148234
Pp1s31_85V6	28	126	2.41058		126	2	-5.59688						0.844798	4.59346	0.0669704	0.474348	PF01135,PF08241	PTHR11579	KOG1661	2.1.1.77	K00573	AT3G48330.2	PIMT1	protein-l-isoaspartate methyltransferase 1		GO:0004719 protein-L-isoaspartate (D-aspartate) O-methyltransferase activity;GO:0004719 protein-L-isoaspartate (D-aspartate) O-methyltransferase activity;GO:0004719 protein-L-isoaspartate (D-aspartate) O-methyltransferase activity;GO:0006464 protein modification process;GO:0005737 cytoplasm;GO:0007568 aging;GO:0009651 response to salt stress;GO:0009737 response to abscisic acid stimulus;GO:000984…
Pp1s29_302V6	32	126	2.21794		126	2	-5.59688						0.965484	4.59346	0.0669704	0
Pp1s5_267V6	0	127	36.2055		127	2	-5.60828						0	4.62992	0.0669704	0.622581
Pp1s96_51V6	6	128	4.65569		128	2	-5.6196						0.181028	4.66637	0.0669704	0.711521						AT2G37300.2				GO:0003674 molecular_function;GO:0008150 biological_process;GO:0012505 endomembrane system
Pp1s38_352V6	34	154	2.41998		154	2	-5.88638						1.02583	5.61423	0.0669704	0	PF03081	PTHR12542	KOG2344		K07195	AT4G31540.1	EXO70G1	exocyst subunit exo70 family protein G1		GO:0000145 exocyst;GO:0006887 exocytosis;GO:0006904 vesicle docking involved in exocytosis;GO:0005829 cytosol
Pp1s258_52V6	1026	161	-2.43124		161	2	-5.95051						30.9558	5.86942	0.0669704	1.92704	PF02518,PF00183	PTHR11528	KOG0019		K04079	AT5G52640.1	HSP90.1	heat shock protein 90.1	Protein processing in endoplasmic reticulum;Plant-pathogen interaction	GO:0005524 ATP binding;GO:0009408 response to heat;GO:0046685 response to arsenic-containing substance;GO:0051082 unfolded protein binding;GO:0005515 protein binding;GO:0009816 "defense response to bacterium, incompatible interaction";GO:0042742 defense response to bacterium;GO:0005618 cell wall;GO:0005515 protein binding;GO:0005886 plasma membrane;GO:0005829 cytosol;GO:0005515 protein binding;GO…
Pp1s44_262V6	46	184	2.24066		184	2	-6.14316						1.38788	6.70791	0.0669704	0.770815						AT1G36095.1		DNA binding		GO:0003677 DNA binding;GO:0005575 cellular_component;GO:0008150 biological_process
Pp1s113_117V6	24	188	3.21028		188	2	-6.17419						0.724113	6.85373	0.0669704	0	PF00999	PTHR10110	KOG1965			AT3G05030.1	NHX2	sodium hydrogen exchanger 2		GO:0006812 cation transport;GO:0006812 cation transport;GO:0006814 sodium ion transport;GO:0006814 sodium ion transport;GO:0006814 sodium ion transport;GO:0006885 regulation of pH;GO:0006885 regulation of pH;GO:0015081 sodium ion transmembrane transporter activity;GO:0015385 sodium:hydrogen antiporter activity;GO:0055085 transmembrane transport;GO:0055085 transmembrane transport
Pp1s163_127V6	117	1050	3.40646		1050	11	-6.19634						3.53005	38.2788	0.368337	2.43103	PF01063	PTHR11825	KOG0975	2.6.1.42	K00826	AT5G65780.1	ATBCAT-5	branched-chain amino acid aminotransferase 5 / branched-chain amino acid transaminase 5 (BCAT5)	Valine, leucine and isoleucine degradation;Valine, leucine and isoleucine biosynthesis;Pantothenate and CoA biosynthesis;Glucosinolate biosynthesis;Metabolic pathways;Biosynthesis of secondary metabolites	GO:0003824 catalytic activity;GO:0008152 metabolic process;GO:0009081 branched chain family amino acid metabolic process;GO:0004084 branched-chain-amino-acid transaminase activity;GO:0009507 chloroplast;GO:0005739 mitochondrion;GO:0009507 chloroplast
Pp1s37_353V6	39	287	3.12016		287	3	-6.19954						1.17668	10.4629	0.100456	2.49032	PF00319	PTHR11945	KOG0014			AT1G65330.1	PHE1	MADS-box transcription factor family protein		GO:0003677 DNA binding;GO:0003700 sequence-specific DNA binding transcription factor activity;GO:0003700 sequence-specific DNA binding transcription factor activity;GO:0005634 nucleus;GO:0005634 nucleus;GO:0009793 embryo development ending in seed dormancy;GO:0003700 sequence-specific DNA binding transcription factor activity;GO:0090406 pollen tube
Pp1s397_21V6	5	322	6.24964		322	2	-6.95051						0.150857	11.7388	0.0669704	1.36375	PF00483,PF00132	PTHR22572	KOG1322			AT5G19220.1	APL1	ADP glucose pyrophosphorylase large subunit 1	Starch and sucrose metabolism;Amino sugar and nucleotide sugar metabolism;Metabolic pathways	GO:0008878 glucose-1-phosphate adenylyltransferase activity;GO:0009058 biosynthetic process;GO:0009941 chloroplast envelope;GO:0009570 chloroplast stroma;GO:0009507 chloroplast;GO:0008878 glucose-1-phosphate adenylyltransferase activity;GO:0008878 glucose-1-phosphate adenylyltransferase activity;GO:0009570 chloroplast stroma
Pp1s61_125V6	0	391	37.8278		391	2	-7.23062						0	14.2543	0.0669704	2.01598	PF00406	PTHR23359	KOG3079			AT5G26667.1	PYR6	P-loop containing nucleoside triphosphate hydrolases superfamily protein	Pyrimidine metabolism;Metabolic pathways	GO:0009041 uridylate kinase activity;GO:0005829 cytosol;GO:0005829 cytosol;GO:0005829 cytosol;GO:0004127 cytidylate kinase activity;GO:0009041 uridylate kinase activity;GO:0009173 pyrimidine ribonucleoside monophosphate metabolic process
Pp1s32_209V6	2	3708	11.0971		3708	16	-7.47602						0.0603427	135.179	0.535763	0.681875	PF02469	PTHR10900:SF12
Pp1s196_53V6	54	475	3.37755		475	2	-7.51138						1.62925	17.3166	0.0669704	0.17788	PF00484	PTHR11002	KOG1578			AT5G14740.2	CA2	carbonic anhydrase 2	Nitrogen metabolism	GO:0004089 carbonate dehydratase activity;GO:0004089 carbonate dehydratase activity;GO:0004089 carbonate dehydratase activity;GO:0004089 carbonate dehydratase activity;GO:0004089 carbonate dehydratase activity;GO:0004089 carbonate dehydratase activity;GO:0008270 zinc ion binding;GO:0008270 zinc ion binding;GO:0008270 zinc ion binding;GO:0008270 zinc ion binding;GO:0008270 zinc ion binding;GO:0008…
Pp1s15_309V6	154	783	2.58674		783	2	-8.23247						4.64639	28.5451	0.0669704	0.681875	PF03097					AT1G73390.3		Endosomal targeting BRO1-like domain-containing protein		GO:0003674 molecular_function
Pp1s25_135V6	107	955	3.39855		955	2	-8.51895						3.22834	34.8155	0.0669704	0.355761	PF06522					AT3G48140.1		B12D protein		GO:0003674 molecular_function;GO:0010150 leaf senescence;GO:0005777 peroxisome
Pp1s25_371V6	0	101	35.875		101	0	-35.6618						0	3.68206	0	0.17788
Pp1s12_373V6	16	105	2.9549		105	0	-35.7178						0.482742	3.82788	0	1.80845	PF01423	PTHR23338	KOG3172			AT1G20580.1		Small nuclear ribonucleoprotein family protein		GO:0003674 molecular_function;GO:0005634 nucleus;GO:0005732 small nucleolar ribonucleoprotein complex;GO:0005730 nucleolus;GO:0005829 cytosol
Pp1s52_71V6	13	107	3.28168		107	0	-35.745						0.392228	3.9008	0	0.622581	PF07745
Pp1s45_106V6	20	107	2.66019		107	0	-35.745						0.603427	3.9008	0	2.49032						AT2G29670.1		Tetratricopeptide repeat (TPR)-like superfamily protein		GO:0005488 binding
Pp1s169_138V6	2	110	6.02202		110	0	-35.7849						0.0603427	4.01016	0	0.296467	PF00676	PTHR11516				AT1G24180.1	IAR4	Thiamin diphosphate-binding fold (THDP-binding) superfamily protein	Glycolysis / Gluconeogenesis;Citrate cycle (TCA cycle);Valine, leucine and isoleucine biosynthesis;Pyruvate metabolism;Butanoate metabolism;Metabolic pathways;Biosynthesis of secondary metabolites	GO:0004739 pyruvate dehydrogenase (acetyl-transferring) activity;GO:0008152 metabolic process;GO:0005739 mitochondrion;GO:0005739 mitochondrion;GO:0009651 response to salt stress;GO:0005739 mitochondrion;GO:0005634 nucleus;GO:0005829 cytosol;GO:0008270 zinc ion binding;GO:0050897 cobalt ion binding
Pp1s88_174V6	4	115	5.08615		115	0	-35.8491						0.120685	4.19244	0	0	PF00319	PTHR11945	KOG0014			AT5G60440.1	AGL62	AGAMOUS-like 62		GO:0003677 DNA binding;GO:0005634 nucleus;GO:0003700 sequence-specific DNA binding transcription factor activity;GO:0003700 sequence-specific DNA binding transcription factor activity;GO:0003700 sequence-specific DNA binding transcription factor activity;GO:0009960 endosperm development
Pp1s145_136V6	2	118	6.1233		118	0	-35.8862						0.0603427	4.30181	0	0.148234	PF00168,PF02893	PTHR23319	KOG1032			AT1G03370.1		C2 calcium/lipid-binding and GRAM domain containing protein		GO:0008150 biological_process
Pp1s32_115V6	33	118	2.0789		118	0	-35.8862						0.995655	4.30181	0	1.63057	PF05564					AT1G56220.3		Dormancy/auxin associated family protein		GO:0003674 molecular_function;GO:0005575 cellular_component
Pp1s54_227V6	33	118	2.0789		118	0	-35.8862						0.995655	4.30181	0	0.889402
Pp1s81_159V6	28	121	2.35216		121	0	-35.9224						0.844798	4.41118	0	0.0889402	PF08446,PF01590,PF00360,PF00989,PF08448,PF00512,PF02518	PTHR23283				AT2G18790.1	PHYB	phytochrome B	Circadian rhythm - plant	GO:0004673 protein histidine kinase activity;GO:0004871 signal transducer activity;GO:0006355 "regulation of transcription, DNA-dependent";GO:0008020 G-protein coupled photoreceptor activity;GO:0005634 nucleus;GO:0005515 protein binding;GO:0005515 protein binding;GO:0005515 protein binding;GO:0005515 protein binding;GO:0005515 protein binding;GO:0005515 protein binding;GO:0009409 response to cold…
Pp1s130_124V6	0	129	36.228		129	0	-36.0148						0	4.70283	0	0.859755
Pp1s111_159V6	27	134	2.55186		134	0	-36.0697						0.814627	4.88511	0	0.0592934	PF04658	PTHR12228			K03132	AT1G55300.1	TAF7	TBP-associated factor 7	Basal transcription factors	GO:0006367 transcription initiation from RNA polymerase II promoter;GO:0006367 transcription initiation from RNA polymerase II promoter
Pp1s113_38V6	38	137	2.09076		137	0	-36.1016						1.14651	4.99448	0	0.0592934	PF00719	PTHR10286	KOG1626	3.6.1.1	K01507	AT5G09650.1	PPa6	pyrophosphorylase 6	Oxidative phosphorylation	GO:0008152 metabolic process;GO:0016020 membrane;GO:0016462 pyrophosphatase activity;GO:0009941 chloroplast envelope;GO:0004427 inorganic diphosphatase activity;GO:0004427 inorganic diphosphatase activity;GO:0009570 chloroplast stroma;GO:0044434 chloroplast part;GO:0009570 chloroplast stroma;GO:0004427 inorganic diphosphatase activity;GO:0046686 response to cadmium ion;GO:0009579 thylakoid;GO:004…
Pp1s65_4V6	25	138	2.70532		138	0	-36.1121						0.754284	5.03093	0	0.118587	PF00730,PF00633,PF10576	PTHR10359	KOG1921	4.2.99.18	K10773	AT1G05900.2	NTH2	endonuclease III 2	Base excision repair	GO:0006284 base-excision repair;GO:0006284 base-excision repair;GO:0019104 DNA N-glycosylase activity;GO:0042644 chloroplast nucleoid
Pp1s2_432V6	17	142	3.30294		142	0	-36.1533						0.512913	5.17676	0	1.06728			KOG4629			AT1G53470.1	MSL4	mechanosensitive channel of small conductance-like 4		GO:0016020 membrane;GO:0055085 transmembrane transport;GO:0005886 plasma membrane;GO:0005886 plasma membrane
Pp1s76_39V6	18	145	3.25064		145	0	-36.1835						0.543085	5.28613	0	0	PF01370	PTHR10366	KOG1502			AT5G19440.1		NAD(P)-binding Rossmann-fold superfamily protein		GO:0004022 alcohol dehydrogenase (NAD) activity;GO:0005886 plasma membrane;GO:0005829 cytosol
Pp1s5_351V6	24	150	2.88451		150	0	-36.2324						0.724113	5.46841	0	0.118587		PTHR11780				AT5G08530.1	CI51	51 kDa subunit of complex I	Oxidative phosphorylation;Metabolic pathways	GO:0006120 "mitochondrial electron transport, NADH to ubiquinone";GO:0008137 NADH dehydrogenase (ubiquinone) activity;GO:0008137 NADH dehydrogenase (ubiquinone) activity;GO:0010181 FMN binding;GO:0016651 "oxidoreductase activity, acting on NADH or NADPH";GO:0051287 NAD or NADH binding;GO:0051539 "4 iron, 4 sulfur cluster binding";GO:0055114 oxidation-reduction process;GO:0005739 mitochondrion;GO:…
Pp1s76_45V6	31	160	2.60839		160	0	-36.3255						0.935312	5.83297	0	0.741168	PF01988		KOG4473			AT2G01770.1	VIT1	vacuolar iron transporter 1		GO:0005381 iron ion transmembrane transporter activity;GO:0005774 vacuolar membrane;GO:0006880 intracellular sequestering of iron ion;GO:0006880 intracellular sequestering of iron ion;GO:0055072 iron ion homeostasis
Pp1s171_111V6	40	163	2.26746		163	0	-36.3523						1.20685	5.94233	0	0.0592934	PF00582					AT1G11360.1		Adenine nucleotide alpha hydrolases-like superfamily protein		GO:0006950 response to stress;GO:0006950 response to stress;GO:0006950 response to stress;GO:0006950 response to stress;GO:0006950 response to stress;GO:0005886 plasma membrane;GO:0005886 plasma membrane;GO:0005829 cytosol
Pp1s352_13V6	0	183	36.7325		183	0	-36.5193						0	6.67145	0	0.0592934
Pp1s92_87V6	18	187	3.61763		187	0	-36.5505						0.543085	6.81728	0	0.266821
Pp1s59_305V6	0	222	37.0112		222	0	-36.798						0	8.09324	0	0.0889402	PF08063,PF00533,PF05406,PF00644	PTHR15447	KOG1037			AT5G22470.1		NAD+ ADP-ribosyltransferases;NAD+ ADP-ribosyltransferases		GO:0003950 NAD+ ADP-ribosyltransferase activity;GO:0003950 NAD+ ADP-ribosyltransferase activity;GO:0005622 intracellular;GO:0005634 nucleus;GO:0005634 nucleus;GO:0006471 protein ADP-ribosylation;GO:0006471 protein ADP-ribosylation
Pp1s13_349V6	9	226	4.89091		226	0	-36.8237						0.271542	8.23906	0	0.148234
Pp1s224_13V6	0	246	37.1593		246	0	-36.9461						0	8.96818	0	0.118587
Pp1s44_37V6	0	260	37.2392		260	0	-37.0259						0	9.47857	0	0.0889402						AT1G49000.1				GO:0003674 molecular_function;GO:0008150 biological_process;GO:0009507 chloroplast
Pp1s8_163V6	5	348	6.36167		348	0	-37.4465						0.150857	12.6867	0	0.622581	PF00282	PTHR11999	KOG1383			AT2G02010.1	GAD4	glutamate decarboxylase 4	Alanine, aspartate and glutamate metabolism;beta-Alanine metabolism;Taurine and hypotaurine metabolism;Butanoate metabolism;Metabolic pathways;Biosynthesis of secondary metabolites	GO:0006536 glutamate metabolic process;GO:0019752 carboxylic acid metabolic process;GO:0005516 calmodulin binding;GO:0005634 nucleus;GO:0005829 cytosol
Pp1s7_391V6	0	894	39.021						195	40	-2.20526		0	32.5917	6.52961	1.18587	PF00301					AT5G51010.1		Rubredoxin-like superfamily protein		GO:0009055 electron carrier activity;GO:0046872 metal ion binding;GO:0046872 metal ion binding
Pp1s25_107V6	0	707	38.6824										0	25.7744	25.2813	28.194
Pp1s141_128V6	0	594	38.4311										0	21.6549	7.86902	5.63288	PF00248	PTHR11732	KOG1577			AT2G37770.2		NAD(P)-linked oxidoreductase superfamily protein		GO:0004033 aldo-keto reductase activity;GO:0009409 response to cold;GO:0009409 response to cold;GO:0009414 response to water deprivation;GO:0009414 response to water deprivation;GO:0009651 response to salt stress;GO:0009651 response to salt stress;GO:0016229 steroid dehydrogenase activity;GO:0070401 NADP binding;GO:0008106 alcohol dehydrogenase (NADP+) activity;GO:0009507 chloroplast;GO:0055114 o…
Pp1s271_8V6	0	538	38.2883										0	19.6133	6.52961	2.46068	PF02798,PF00043	PTHR11260	KOG1422			AT1G75270.1	DHAR2	dehydroascorbate reductase 2		GO:0045174 glutathione dehydrogenase (ascorbate) activity;GO:0010731 protein glutathionylation;GO:0045174 glutathione dehydrogenase (ascorbate) activity;GO:0043295 glutathione binding;GO:0005886 plasma membrane;GO:0005829 cytosol
Pp1s60_50V6	0	267	37.2775										0	9.73376	3.8508	3.6169
Pp1s72_122V6	0	198	36.8462										0	7.2183	1.60729	0.0592934
Pp1s371_37V6	0	149	36.436										0	5.43195	1.43986	0.355761						AT5G04830.1		Nuclear transport factor 2 (NTF2) family protein		GO:0003674 molecular_function;GO:0008150 biological_process
Pp1s22_337V6	0	136	36.3043						108	24	-2.08979		0	4.95802	3.6164	0.711521
Pp1s13_277V6	0	135	36.2936										0	4.92156	1.00456	1.54163
Pp1s26_236V6	8	3779	9.12444						3241	551	-2.47618		0.241371	137.767	108.525	16.3353		PTHR11315	KOG1559			AT1G78660.3	GGH1	gamma-glutamyl hydrolase 1	Folate biosynthesis	GO:0005773 vacuole;GO:0008242 omega peptidase activity;GO:0046900 tetrahydrofolylpolyglutamate metabolic process
Pp1s196_69V6	2	391	7.85168						1164	151	-2.86633		0.0603427	14.2543	38.9768	4.47666		PTHR14154				AT3G22840.1	ELIP1	Chlorophyll A-B binding family protein		GO:0016168 chlorophyll binding;GO:0009409 response to cold;GO:0080167 response to karrikin
Pp1s234_91V6	3	578	7.83062						563	63	-3.07957		0.0905141	21.0716	18.8522	1.86774	PF02987,PF05532	PTHR23241				AT5G44310.2		Late embryogenesis abundant protein (LEA) family protein		GO:0009793 embryo development ending in seed dormancy
Pp1s34_349V6	3	500	7.62148						1257	27	-5.46074		0.0905141	18.228	42.0909	0.800462
Pp1s340_19V6	2	299	7.46466										0.0603427	10.9004	5.15672	1.74916	PF06884					AT1G29680.1		Protein of unknown function (DUF1264)		GO:0003674 molecular_function;GO:0005575 cellular_component;GO:0008150 biological_process
Pp1s203_102V6	3	333	7.03507										0.0905141	12.1399	10.213	9.16084
Pp1s232_64V6	3	330	7.02202						373	2411	2.77252		0.0905141	12.0305	12.49	71.4783
Pp1s156_7V6	18	1555	6.67343										0.543085	56.6891	25.2143	15.3866	PF02987	PTHR23241				AT3G53040.1		late embryogenesis abundant protein, putative / LEA protein, putative		GO:0009793 embryo development ending in seed dormancy
Pp1s118_232V6	8	640	6.56258						222	1161	2.46687		0.241371	23.3319	7.43371	34.4198	PF02987	PTHR23241				AT2G18340.1		late embryogenesis abundant domain-containing protein / LEA domain-containing protein		GO:0003674 molecular_function;GO:0009793 embryo development ending in seed dormancy;GO:0012505 endomembrane system
Pp1s9_402V6	2	148	6.45011						39	510	3.78909		0.0603427	5.39549	1.30592	15.1198	PF04193	PTHR14856:SF7				AT4G36850.1		PQ-loop repeat family protein / transmembrane family protein		GO:0008150 biological_process;GO:0016020 membrane
Pp1s109_92V6	21	1542	6.43893						4089	567	-2.77019		0.633599	56.2152	136.921	16.8097
Pp1s227_58V6	4	281	6.37508										0.120685	10.2441	9.74419	8.50861	PF02987
Pp1s379_8V6	2	139	6.3596										0.0603427	5.06739	1.64077	1.51198	PF01636,PF01633	PTHR22603	KOG4720			AT2G26830.1	emb1187	Protein kinase superfamily protein	Glycerophospholipid metabolism;Metabolic pathways	GO:0009793 embryo development ending in seed dormancy;GO:0016301 kinase activity;GO:0016773 "phosphotransferase activity, alcohol group as acceptor"
Pp1s11_295V6	3	184	6.17926										0.0905141	6.70791	1.20547	0.948695	PF05512					AT1G04560.1		AWPM-19-like family protein		GO:0003674 molecular_function;GO:0008150 biological_process;GO:0012505 endomembrane system
Pp1s12_260V6	9	538	6.14219						105	622	2.64666		0.271542	19.6133	3.51594	18.4403		PTHR10366	KOG1430			AT4G24220.1	VEP1	NAD(P)-binding Rossmann-fold superfamily protein		GO:0009611 response to wounding;GO:0010051 xylem and phloem pattern formation;GO:0008202 steroid metabolic process;GO:0035671 ;GO:0005829 cytosol;GO:0005829 cytosol
Pp1s147_26V6	61	3208	5.95738										1.84045	116.951	31.8109	8.68649	PF04525					AT5G01750.2		Protein of unknown function (DUF567)		GO:0003674 molecular_function;GO:0008150 biological_process;GO:0009507 chloroplast;GO:0009507 chloroplast
Pp1s335_78V6	11	488	5.71196										0.331885	17.7905	3.6164	2.66821
Pp1s66_199V6	42	1823	5.68044						496	3184	2.76257		1.2672	66.4594	16.6087	94.3952
Pp1s353_22V6	24	929	5.51523										0.724113	33.8677	10.1795	6.52228
Pp1s64_223V6	15	477	5.23161						154	722	2.30921		0.45257	17.3895	5.15672	21.4049
Pp1s241_56V6	4	119	5.13547										0.120685	4.33827	2.24351	1.48234	PF00188	PTHR10334	KOG3017			AT4G33720.1		CAP (Cysteine-rich secretory proteins, Antigen 5, and Pathogenesis-related 1 protein) superfamily protein		GO:0003674 molecular_function;GO:0005576 extracellular region;GO:0005576 extracellular region;GO:0008150 biological_process;GO:0012505 endomembrane system
Pp1s17_377V6	5	138	5.02725						255	16	-3.91422		0.150857	5.03093	8.53872	0.474348	PF00380	PTHR21569	KOG1753		K02960	AT5G18380.1		Ribosomal protein S5 domain 2-like superfamily protein	Ribosome	GO:0003735 structural constituent of ribosome;GO:0006412 translation;GO:0022627 cytosolic small ribosomal subunit;GO:0022627 cytosolic small ribosomal subunit;GO:0009507 chloroplast;GO:0009507 chloroplast
Pp1s67_30V6	493	13545	5.02068										14.8745	493.797	116.83	77.6151
Pp1s163_95V6	4	107	4.98212										0.120685	3.9008	4.82187	1.89739	PF00010					AT3G21330.1		basic helix-loop-helix (bHLH) DNA-binding superfamily protein		GO:0003677 DNA binding;GO:0003700 sequence-specific DNA binding transcription factor activity;GO:0005634 nucleus;GO:0003700 sequence-specific DNA binding transcription factor activity;GO:0006355 "regulation of transcription, DNA-dependent";GO:0003700 sequence-specific DNA binding transcription factor activity
Pp1s52_212V6	22	584	4.97105										0.66377	21.2903	28.161	14.2897	PF02987	PTHR23241				AT4G36600.1		Late embryogenesis abundant (LEA) protein		GO:0003674 molecular_function;GO:0009793 embryo development ending in seed dormancy
Pp1s317_73V6	6	159	4.96858						47	338	2.92643		0.181028	5.79651	1.5738	10.0206	PF06884					AT5G45690.1		Protein of unknown function (DUF1264)		GO:0003674 molecular_function;GO:0005575 cellular_component;GO:0008150 biological_process
Pp1s55_61V6	8	207	4.93414						390	22	-4.06776		0.241371	7.5464	13.0592	0.652228						AT3G52790.1		peptidoglycan-binding LysM domain-containing protein		GO:0003674 molecular_function;GO:0012505 endomembrane system;GO:0016998 cell wall macromolecule catabolic process;GO:0016998 cell wall macromolecule catabolic process
Pp1s83_58V6	5	125	4.88451										0.150857	4.557	2.81276	2.01598	PF00067	PTHR19383	KOG0157	1.14.-.-	K12637	AT4G36380.1	ROT3	Cytochrome P450 superfamily protein	Brassinosteroid biosynthesis;Metabolic pathways;Biosynthesis of secondary metabolites	GO:0016132 brassinosteroid biosynthetic process;GO:0010268 brassinosteroid homeostasis;GO:0016709 "oxidoreductase activity, acting on paired donors, with incorporation or reduction of molecular oxygen, NADH or NADPH as one donor, and incorporation of one atom of oxygen";GO:0048366 leaf development;GO:0048441 petal development;GO:0048443 stamen development;GO:0008395 steroid hydroxylase activity;G…
Pp1s8_176V6	14	312	4.7187										0.422399	11.3743	2.14305	3.70584
Pp1s161_8V6	28	573	4.59569						181	763	2.15583		0.844798	20.8893	6.06082	22.6205		PTHR23241	KOG2886			AT1G72100.1		late embryogenesis abundant domain-containing protein / LEA domain-containing protein		GO:0009793 embryo development ending in seed dormancy;GO:0012505 endomembrane system
Pp1s204_29V6	6	121	4.57456										0.181028	4.41118	1.8082	2.07527
Pp1s324_46V6	77	1338	4.35973										2.3232	48.7782	16.8765	40.9421	PF03168					AT1G01470.1	LEA14	Late embryogenesis abundant protein		GO:0003674 molecular_function;GO:0003674 molecular_function;GO:0009269 response to desiccation;GO:0009793 embryo development ending in seed dormancy;GO:0009644 response to high light intensity;GO:0009611 response to wounding;GO:0050832 defense response to fungus;GO:0005829 cytosol
Pp1s289_66V6	50	826	4.2868						174	2174	3.72333		1.50857	30.1127	5.82642	64.452
Pp1s180_120V6	27	442	4.27367										0.814627	16.1136	4.42004	8.98296						AT1G15010.1				GO:0003674 molecular_function;GO:0050832 defense response to fungus
Pp1s142_113V6	9	144	4.24066										0.271542	5.24967	3.08064	4.03195	PF00571	PTHR13780				AT1G80090.1		Cystathionine beta-synthase (CBS) family protein		GO:0003674 molecular_function;GO:0005575 cellular_component;GO:0003006 developmental process involved in reproduction;GO:0009555 pollen development;GO:0010183 pollen tube guidance
Pp1s86_10V6	27	428	4.22724										0.814627	15.6032	5.02278	3.49831	PF05512					AT1G04560.1		AWPM-19-like family protein		GO:0003674 molecular_function;GO:0008150 biological_process;GO:0012505 endomembrane system
Pp1s69_87V6	24	377	4.21411										0.724113	13.7439	25.0804	26.8896
Pp1s77_50V6	82	1257	4.17887										2.47405	45.8252	22.502	21.3456
Pp1s369_30V6	9	134	4.13682						87	336	2.02951		0.271542	4.88511	2.91321	9.9613	PF08246,PF00112,PF00396	PTHR12411	KOG1543			AT1G47128.1	RD21	Granulin repeat cysteine protease family protein		GO:0004197 cysteine-type endopeptidase activity;GO:0008234 cysteine-type peptidase activity;GO:0008234 cysteine-type peptidase activity;GO:0009507 chloroplast;GO:0005773 vacuole;GO:0005773 vacuole;GO:0048046 apoplast;GO:0005515 protein binding;GO:0005829 cytosol;GO:0009414 response to water deprivation
Pp1s2_161V6	23	339	4.12224						116	26	-2.0774		0.693941	12.3586	3.88428	0.770815	PF04547	PTHR12308	KOG2513			AT1G73020.1				GO:0003674 molecular_function;GO:0008150 biological_process
Pp1s114_139V6	45	661	4.11731										1.35771	24.0974	65.564	16.9579	PF02987	PTHR23241				AT2G18340.1		late embryogenesis abundant domain-containing protein / LEA domain-containing protein		GO:0003674 molecular_function;GO:0009793 embryo development ending in seed dormancy;GO:0012505 endomembrane system
Pp1s83_251V6	13	186	4.07937										0.392228	6.78082	1.50683	3.14255						AT4G36440.1				GO:0003674 molecular_function;GO:0008150 biological_process
Pp1s10_88V6	10	143	4.0786										0.301714	5.21321	1.5738	0.444701						AT3G03341.1
Pp1s370_63V6	25	356	4.07253										0.754284	12.9783	2.74579	0.207527	PF00125,PF00808	PTHR10252				AT1G56170.1	NF-YC2	nuclear factor Y, subunit C2		GO:0003677 DNA binding;GO:0005634 nucleus;GO:0006355 "regulation of transcription, DNA-dependent";GO:0003700 sequence-specific DNA binding transcription factor activity;GO:0005634 nucleus;GO:0005737 cytoplasm;GO:0005515 protein binding;GO:0045893 "positive regulation of transcription, DNA-dependent";GO:0003700 sequence-specific DNA binding transcription factor activity;GO:0006355 "regulation of t…
Pp1s240_74V6	27	380	4.05562										0.814627	13.8533	38.0392	30.8622
Pp1s249_85V6	8	111	4.03507										0.241371	4.04662	3.44897	1.63057	PF01655	PTHR23413	KOG0878		K02912	AT4G18100.1		Ribosomal protein L32e	Ribosome	GO:0003735 structural constituent of ribosome;GO:0003735 structural constituent of ribosome;GO:0005840 ribosome;GO:0006412 translation;GO:0006412 translation;GO:0042254 ribosome biogenesis;GO:0005730 nucleolus;GO:0022626 cytosolic ribosome;GO:0022625 cytosolic large ribosomal subunit;GO:0005829 cytosol
Pp1s88_47V6	74	1025	4.03261						626	19	-4.96195		2.23268	37.3674	20.9617	0.563288	PF01964				K03147	AT2G29630.1	THIC	thiaminC	Thiamine metabolism;Metabolic pathways	GO:0003824 catalytic activity;GO:0009228 thiamine biosynthetic process;GO:0009228 thiamine biosynthetic process;GO:0016045 detection of bacterium;GO:0009570 chloroplast stroma;GO:0010266 response to vitamin B1;GO:0009228 thiamine biosynthetic process;GO:0009570 chloroplast stroma;GO:0051536 iron-sulfur cluster binding;GO:0009507 chloroplast;GO:0009536 plastid;GO:0080041 ADP-ribose pyrophosphohydr…
Pp1s379_26V6	41	567	4.03031										1.23703	20.6706	22.569	16.365	PF02370
Pp1s414_10V6	13	179	4.02403										0.392228	6.52563	1.27244	0.17788	PF00349,PF03727	PTHR19443	KOG1369	2.7.1.1	K00844	AT4G29130.1	HXK1	hexokinase 1	Glycolysis / Gluconeogenesis;Fructose and mannose metabolism;Galactose metabolism;Starch and sucrose metabolism;Amino sugar and nucleotide sugar metabolism;Metabolic pathways;Biosynthesis of secondary metabolites	GO:0004396 hexokinase activity;GO:0005524 ATP binding;GO:0004340 glucokinase activity;GO:0004396 hexokinase activity;GO:0008865 fructokinase activity;GO:0019320 hexose catabolic process;GO:0004340 glucokinase activity;GO:0010182 sugar mediated signaling pathway;GO:0010255 glucose mediated signaling pathway;GO:0005739 mitochondrion;GO:0005773 vacuole;GO:0005739 mitochondrion;GO:0009536 plastid;GO:…
Pp1s106_16V6	78	1004	3.9268						202	1064	2.47721		2.35337	36.6019	6.76401	31.5441	PF00389,PF02826	PTHR10996	KOG0069	1.2.1.2	K00122	AT5G14780.1	FDH	formate dehydrogenase	Glyoxylate and dicarboxylate metabolism;Metabolic pathways	GO:0003824 catalytic activity;GO:0005488 binding;GO:0016616 "oxidoreductase activity, acting on the CH-OH group of donors, NAD or NADP as acceptor";GO:0048037 cofactor binding;GO:0051287 NAD or NADH binding;GO:0005739 mitochondrion;GO:0009507 chloroplast;GO:0009611 response to wounding;GO:0009579 thylakoid;GO:0005739 mitochondrion;GO:0009507 chloroplast;GO:0046686 response to cadmium ion;GO:00057…
Pp1s99_154V6	11	139	3.90017										0.331885	5.06739	1.40638	1.89739	PF00083,PF07690	PTHR11600	KOG0254			AT1G67300.1		Major facilitator superfamily protein		GO:0005351 sugar:hydrogen symporter activity;GO:0006810 transport;GO:0006810 transport;GO:0015144 carbohydrate transmembrane transporter activity;GO:0015144 carbohydrate transmembrane transporter activity;GO:0016020 membrane;GO:0016020 membrane;GO:0016020 membrane;GO:0016021 integral to membrane;GO:0016021 integral to membrane;GO:0055085 transmembrane transport;GO:0055085 transmembrane transport
Pp1s9_391V6	68	809	3.81319										2.05165	29.4929	10.4474	4.5656	PF00168	PTHR10774				AT1G20080.1	SYTB	Calcium-dependent lipid-binding (CaLB domain) family protein		GO:0003674 molecular_function;GO:0008150 biological_process
Pp1s141_147V6	73	860	3.79902										2.20251	31.3522	19.8567	5.42535
Pp1s69_160V6	19	222	3.78714										0.573256	8.09324	1.8082	0.148234	PF00561	PTHR10992	KOG1454			AT1G64670.1	BDG1	alpha/beta-Hydrolases superfamily protein		GO:0016787 hydrolase activity;GO:0048196 middle lamella-containing extracellular matrix
Pp1s128_127V6	32	356	3.71639						181	2122	3.6315		0.965484	12.9783	6.06082	62.9103	PF08240,PF00107	PTHR11695	KOG1198			AT4G21580.1		oxidoreductase, zinc-binding dehydrogenase family protein		GO:0003824 catalytic activity;GO:0003824 catalytic activity;GO:0003824 catalytic activity;GO:0005488 binding;GO:0005488 binding;GO:0005488 binding;GO:0008152 metabolic process;GO:0008152 metabolic process;GO:0008152 metabolic process;GO:0008270 zinc ion binding;GO:0008270 zinc ion binding;GO:0008270 zinc ion binding;GO:0008270 zinc ion binding;GO:0016491 oxidoreductase activity;GO:0016491 oxidore…
Pp1s389_8V6	11	122	3.71196										0.331885	4.44764	1.90866	0.17788	PF07911					AT1G72510.2		Protein of unknown function (DUF1677)		GO:0003674 molecular_function;GO:0005575 cellular_component;GO:0008150 biological_process
Pp1s260_17V6	14	153	3.69069										0.422399	5.57777	2.9467	0.978342		PTHR11054	KOG3147			AT5G24400.1	EMB2024	NagB/RpiA/CoA transferase-like superfamily protein	Pentose phosphate pathway;Metabolic pathways;Biosynthesis of secondary metabolites	GO:0003824 catalytic activity;GO:0005975 carbohydrate metabolic process;GO:0009793 embryo development ending in seed dormancy;GO:0005777 peroxisome;GO:0009507 chloroplast;GO:0009570 chloroplast stroma;GO:0002229 defense response to oomycetes;GO:0009507 chloroplast;GO:0017057 6-phosphogluconolactonase activity;GO:0042742 defense response to bacterium;GO:0071461 cellular response to redox state;GO:…
Pp1s13_231V6	133	1417	3.654						1735	360	-2.18873		4.01279	51.6582	58.0968	10.6728
Pp1s249_62V6	29	308	3.64946										0.87497	11.2285	14.5661	19.2704	PF00160	PTHR11071	KOG0865	5.2.1.8	K01802	AT2G21130.1		Cyclophilin-like peptidyl-prolyl cis-trans isomerase family protein		GO:0003755 peptidyl-prolyl cis-trans isomerase activity;GO:0003755 peptidyl-prolyl cis-trans isomerase activity;GO:0006457 protein folding;GO:0006457 protein folding;GO:0005886 plasma membrane;GO:0005829 cytosol
Pp1s45_68V6	19	201	3.64378										0.573256	7.32766	2.00911	4.62489
Pp1s313_9V6	19	196	3.60744										0.573256	7.14538	1.74123	0.563288						AT5G55980.1		serine-rich protein-related		GO:0003674 molecular_function;GO:0008150 biological_process
Pp1s55_66V6	97	994	3.59784										2.92662	36.2373	27.0225	7.29309		PTHR23241				AT5G44310.2		Late embryogenesis abundant protein (LEA) family protein		GO:0009793 embryo development ending in seed dormancy
Pp1s24_247V6	210	2075	3.54531										6.33599	75.6463	13.8294	29.5281	PF00248	PTHR11732	KOG1575			AT1G04690.1	KAB1	potassium channel beta subunit 1		GO:0005267 potassium channel activity;GO:0006813 potassium ion transport;GO:0006813 potassium ion transport;GO:0016491 oxidoreductase activity;GO:0055085 transmembrane transport;GO:0055114 oxidation-reduction process;GO:0005886 plasma membrane;GO:0016020 membrane;GO:0005886 plasma membrane;GO:0005829 cytosol
Pp1s55_64V6	27	252	3.46305										0.814627	9.18692	2.74579	6.10723		PTHR23241
Pp1s131_25V6	24	220	3.43705						649	74	-3.05248		0.724113	8.02033	21.7319	2.19386						AT1G27990.1				GO:0003674 molecular_function;GO:0005575 cellular_component;GO:0008150 biological_process
Pp1s255_28V6	57	501	3.37643						686	42	-3.94961		1.71977	18.2645	22.9708	1.24516	PF03501	PTHR12146	KOG3344		K02947	AT4G25740.1		RNA binding Plectin/S10 domain-containing protein		GO:0003735 structural constituent of ribosome;GO:0006412 translation;GO:0022627 cytosolic small ribosomal subunit;GO:0022626 cytosolic ribosome;GO:0022626 cytosolic ribosome;GO:0022626 cytosolic ribosome;GO:0016020 membrane;GO:0016020 membrane;GO:0022627 cytosolic small ribosomal subunit;GO:0005829 cytosol;GO:0005829 cytosol
Pp1s145_161V6	13	114	3.37311										0.392228	4.15599	0.83713	0.296467	PF02798,PF00043	PTHR11260	KOG0406			AT3G55040.1	GSTL2	glutathione transferase lambda 2		GO:0010731 protein glutathionylation;GO:0009570 chloroplast stroma;GO:0009507 chloroplast;GO:0009570 chloroplast stroma
Pp1s79_93V6	20	165	3.28505										0.603427	6.01525	5.85991	1.89739						AT4G17600.1	LIL3:1	Chlorophyll A-B binding family protein		GO:0003700 sequence-specific DNA binding transcription factor activity;GO:0006355 "regulation of transcription, DNA-dependent";GO:0009535 chloroplast thylakoid membrane;GO:0009535 chloroplast thylakoid membrane;GO:0009507 chloroplast
Pp1s83_138V6	16	130	3.26302										0.482742	4.73928	1.47335	0.237174						AT1G29820.2		Magnesium transporter CorA-like family protein		GO:0016020 membrane;GO:0016020 membrane;GO:0030001 metal ion transport;GO:0030001 metal ion transport;GO:0046873 metal ion transmembrane transporter activity;GO:0046873 metal ion transmembrane transporter activity;GO:0055085 transmembrane transport;GO:0055085 transmembrane transport
Pp1s22_38V6	50	393	3.21518										1.50857	14.3272	3.08064	0.415054
Pp1s102_81V6	364	2851	3.21011										10.9824	103.936	52.2034	24.7847	PF05512					AT1G04560.1		AWPM-19-like family protein		GO:0003674 molecular_function;GO:0008150 biological_process;GO:0012505 endomembrane system
Pp1s258_30V6	83	650	3.20991										2.50422	23.6964	10.28	18.5292	PF00520,PF00036	PTHR10037				AT4G03560.1	TPC1	two-pore channel 1		GO:0005262 calcium channel activity;GO:0005245 voltage-gated calcium channel activity;GO:0005245 voltage-gated calcium channel activity;GO:0005245 voltage-gated calcium channel activity;GO:0005245 voltage-gated calcium channel activity;GO:0005262 calcium channel activity;GO:0005262 calcium channel activity;GO:0005886 plasma membrane;GO:0006816 calcium ion transport;GO:0006816 calcium ion transpor…
Pp1s41_240V6	40	312	3.20413										1.20685	11.3743	7.50068	1.98633
Pp1s36_341V6	14	103	3.1198										0.422399	3.75497	1.47335	1.3341	PF01979	PTHR11647	KOG2584	3.5.2.5	K01466	AT4G04955.1	ALN	allantoinase	Purine metabolism;Metabolic pathways	GO:0016787 hydrolase activity;GO:0004038 allantoinase activity;GO:0004038 allantoinase activity;GO:0010136 ureide catabolic process;GO:0005783 endoplasmic reticulum;GO:0006995 cellular response to nitrogen starvation
Pp1s90_77V6	15	107	3.07523										0.45257	3.9008	0.9041	0.622581	PF02485	PTHR19297	KOG0799			AT1G03520.1		Core-2/I-branching beta-1,6-N-acetylglucosaminyltransferase family protein		GO:0008375 acetylglucosaminyltransferase activity;GO:0016020 membrane;GO:0016020 membrane;GO:0016020 membrane;GO:0016051 carbohydrate biosynthetic process;GO:0016757 "transferase activity, transferring glycosyl groups"
Pp1s224_83V6	17	120	3.06008										0.512913	4.37472	8.00296	15.9499	PF01344,PF07646	PTHR23244				AT3G07720.1		Galactose oxidase/kelch repeat superfamily protein		GO:0003674 molecular_function;GO:0005634 nucleus;GO:0005737 cytoplasm;GO:0010043 response to zinc ion;GO:0005829 cytosol
Pp1s10_153V6	20	139	3.03767										0.603427	5.06739	1.37289	2.25315	PF00282	PTHR11999	KOG1383	4.1.1.15	K01580	AT2G02010.1	GAD4	glutamate decarboxylase 4	Alanine, aspartate and glutamate metabolism;beta-Alanine metabolism;Taurine and hypotaurine metabolism;Butanoate metabolism;Metabolic pathways;Biosynthesis of secondary metabolites	GO:0006536 glutamate metabolic process;GO:0019752 carboxylic acid metabolic process;GO:0005516 calmodulin binding;GO:0005634 nucleus;GO:0005829 cytosol
Pp1s289_68V6	153	1058	3.03039						738	60	-3.54045		4.61622	38.5705	24.7121	1.7788
Pp1s203_103V6	23	158	3.02087										0.693941	5.76005	2.44442	1.00799						AT5G10010.1				GO:0003674 molecular_function;GO:0008150 biological_process;GO:0005730 nucleolus
Pp1s28_18V6	28	190	3.00316										0.844798	6.92665	3.01367	0.622581
Pp1s30_186V6	23	155	2.99322										0.693941	5.65069	2.14305	1.51198	PF02450	PTHR11440	KOG2369			AT1G27480.1		alpha/beta-Hydrolases superfamily protein		GO:0004607 phosphatidylcholine-sterol O-acyltransferase activity;GO:0004607 phosphatidylcholine-sterol O-acyltransferase activity;GO:0006629 lipid metabolic process;GO:0006629 lipid metabolic process;GO:0005773 vacuole;GO:0005774 vacuolar membrane
Pp1s293_29V6	175	1166	2.9768						1222	17	-6.08743		5.27999	42.5077	40.9189	0.503994	PF03073	PTHR10057	KOG3797			AT2G47770.1	TSPO	TSPO(outer membrane tryptophan-rich sensory protein)-related		GO:0005783 endoplasmic reticulum;GO:0005795 Golgi stack;GO:0006970 response to osmotic stress;GO:0009651 response to salt stress;GO:0009737 response to abscisic acid stimulus;GO:0016020 membrane;GO:0005783 endoplasmic reticulum;GO:0005794 Golgi apparatus;GO:0006778 porphyrin metabolic process;GO:0020037 heme binding
Pp1s142_148V6	30	195	2.9411										0.905141	7.10893	2.07608	1.68986
Pp1s288_10V6	59	375	2.90876										1.78011	13.671	8.77312	9.10154	PF01781	PTHR10965	KOG3499		K02923	AT2G43460.1		Ribosomal L38e protein family	Ribosome	GO:0003735 structural constituent of ribosome;GO:0003735 structural constituent of ribosome;GO:0005840 ribosome;GO:0006412 translation;GO:0006412 translation;GO:0042254 ribosome biogenesis;GO:0022626 cytosolic ribosome;GO:0022626 cytosolic ribosome;GO:0022625 cytosolic large ribosomal subunit
Pp1s175_26V6	23	146	2.90692										0.693941	5.32258	8.73963	10.4356	PF00483,PF00132	PTHR22572	KOG1322	2.7.7.27	K00975	AT1G27680.1	APL2	ADPGLC-PPase large subunit	Starch and sucrose metabolism;Amino sugar and nucleotide sugar metabolism;Metabolic pathways	GO:0005575 cellular_component;GO:0008878 glucose-1-phosphate adenylyltransferase activity;GO:0008878 glucose-1-phosphate adenylyltransferase activity;GO:0008878 glucose-1-phosphate adenylyltransferase activity;GO:0019252 starch biosynthetic process
Pp1s341_68V6	20	125	2.88451										0.603427	4.557	1.60729	1.45269
Pp1s287_31V6	83	515	2.87404										2.50422	18.7749	12.7579	22.5612	PF01476	PTHR21666:SF8
Pp1s51_158V6	59	364	2.86581										1.78011	13.27	9.61025	7.55991
Pp1s263_50V6	39	239	2.85612										1.17668	8.71299	1.5738	0.978342	PF00036	PTHR10891	KOG0027		K13448	AT1G66400.1	CML23	calmodulin like 23	Plant-pathogen interaction	GO:0005509 calcium ion binding;GO:0005509 calcium ion binding;GO:0009909 regulation of flower development;GO:0080164 regulation of nitric oxide metabolic process
Pp1s19_262V6	44	269	2.85269										1.32754	9.80667	3.21458	1.51198	PF00289,PF02786,PF02785,PF00364	PTHR18866	KOG0238	6.4.1.4	K01968	AT1G03090.2	MCCA	methylcrotonyl-CoA carboxylase alpha chain, mitochondrial / 3-methylcrotonyl-CoA carboxylase 1 (MCCA)	Valine, leucine and isoleucine degradation;Metabolic pathways	GO:0004485 methylcrotonoyl-CoA carboxylase activity;GO:0005739 mitochondrion;GO:0006552 leucine catabolic process;GO:0022626 cytosolic ribosome;GO:0022626 cytosolic ribosome;GO:0005739 mitochondrion;GO:0005739 mitochondrion;GO:0050897 cobalt ion binding
Pp1s85_162V6	18	110	2.85209										0.543085	4.01016	1.94214	0	PF00097	PTHR23012	KOG1609			AT3G09760.1		RING/U-box superfamily protein		GO:0008270 zinc ion binding;GO:0008270 zinc ion binding
Pp1s83_66V6	26	157	2.83484										0.784455	5.7236	7.09886	8.00462			KOG4453			AT5G04490.1	VTE5	vitamin E pathway gene 5		GO:0004605 phosphatidate cytidylyltransferase activity;GO:0008654 phospholipid biosynthetic process;GO:0016020 membrane;GO:0010189 vitamin E biosynthetic process;GO:0010276 phytol kinase activity;GO:0009507 chloroplast
Pp1s89_139V6	107	643	2.82786						373	20	-4.14097		3.22834	23.4412	12.49	0.592934	PF07690	PTHR19432	KOG0637			AT1G09960.1	SUT4	sucrose transporter 4		GO:0005351 sugar:hydrogen symporter activity;GO:0008506 sucrose:hydrogen symporter activity;GO:0015144 carbohydrate transmembrane transporter activity;GO:0015770 sucrose transport;GO:0016020 membrane;GO:0055085 transmembrane transport;GO:0005773 vacuole;GO:0005886 plasma membrane;GO:0008515 sucrose transmembrane transporter activity;GO:0008515 sucrose transmembrane transporter activity
Pp1s69_54V6	17	101	2.8114										0.512913	3.68206	0.770159	0.681875	PF00817,PF11799	PTHR11076		2.7.7.7	K03509	AT5G44740.2	POLH	Y-family DNA polymerase H		GO:0006281 DNA repair;GO:0012505 endomembrane system;GO:0003887 DNA-directed DNA polymerase activity;GO:0005515 protein binding;GO:0005515 protein binding;GO:0010224 response to UV-B;GO:0042276 error-prone translesion synthesis
Pp1s317_45V6	74	434	2.79275						159	23	-2.70918		2.23268	15.8219	5.32414	0.681875	PF00085	PTHR10438	KOG0910			AT1G03680.1	THM1	thioredoxin M-type 1		GO:0006979 response to oxidative stress;GO:0008047 enzyme activator activity;GO:0043085 positive regulation of catalytic activity;GO:0009579 thylakoid;GO:0009570 chloroplast stroma;GO:0009579 thylakoid;GO:0009409 response to cold;GO:0010319 stromule;GO:0009507 chloroplast;GO:0048046 apoplast;GO:0009570 chloroplast stroma;GO:0009534 chloroplast thylakoid;GO:0009570 chloroplast stroma;GO:0004857 en…
Pp1s54_34V6	34	199	2.78982										1.02583	7.25475	5.89339	2.7275
Pp1s142_145V6	141	825	2.78935										4.25416	30.0762	7.40023	13.1631						AT4G33625.1				GO:0003674 molecular_function;GO:0008150 biological_process;GO:0005773 vacuole;GO:0005774 vacuolar membrane;GO:0005774 vacuolar membrane
Pp1s17_378V6	23	134	2.78318						85	383	2.25195		0.693941	4.88511	2.84624	11.3547		PTHR13789	KOG2614			AT5G11330.1		FAD/NAD(P)-binding oxidoreductase family protein		GO:0004497 monooxygenase activity;GO:0004497 monooxygenase activity;GO:0012505 endomembrane system;GO:0012505 endomembrane system;GO:0016491 oxidoreductase activity;GO:0055114 oxidation-reduction process;GO:0055114 oxidation-reduction process
Pp1s47_31V6	32	186	2.77981										0.965484	6.78082	3.34852	1.00799	PF08446,PF01590,PF00360,PF00989,PF08448,PF00512,PF02518	PTHR23283			K12121	AT2G18790.1	PHYB	phytochrome B	Circadian rhythm - plant	GO:0004673 protein histidine kinase activity;GO:0004871 signal transducer activity;GO:0006355 "regulation of transcription, DNA-dependent";GO:0008020 G-protein coupled photoreceptor activity;GO:0005634 nucleus;GO:0005515 protein binding;GO:0005515 protein binding;GO:0005515 protein binding;GO:0005515 protein binding;GO:0005515 protein binding;GO:0005515 protein binding;GO:0009409 response to cold…
Pp1s40_23V6	111	639	2.76591										3.34902	23.2954	39.8474	20.6341	PF05562					AT3G50830.1	COR413-PM2	cold-regulated 413-plasma membrane 2		GO:0003674 molecular_function;GO:0003674 molecular_function;GO:0005886 plasma membrane;GO:0006950 response to stress;GO:0005774 vacuolar membrane
Pp1s7_369V6	161	921	2.7568										4.85759	33.576	64.8608	25.3183	PF08079,PF00327	PTHR11524	KOG3184		K02937	AT3G13580.2		Ribosomal protein L30/L7 family protein	Ribosome	GO:0003735 structural constituent of ribosome;GO:0003735 structural constituent of ribosome;GO:0003735 structural constituent of ribosome;GO:0003735 structural constituent of ribosome;GO:0006412 translation;GO:0006412 translation;GO:0006412 translation;GO:0006412 translation;GO:0015934 large ribosomal subunit;GO:0009507 chloroplast;GO:0022626 cytosolic ribosome;GO:0022626 cytosolic ribosome;GO:00…
Pp1s73_232V6	56	317	2.74164										1.6896	11.5566	3.64989	7.38203	PF00238	PTHR11761	KOG0901			AT3G04400.1	emb2171	Ribosomal protein L14p/L23e family protein	Ribosome	GO:0003735 structural constituent of ribosome;GO:0003735 structural constituent of ribosome;GO:0003735 structural constituent of ribosome;GO:0005840 ribosome;GO:0006412 translation;GO:0009793 embryo development ending in seed dormancy;GO:0022625 cytosolic large ribosomal subunit
Pp1s262_52V6	25	141	2.73635										0.754284	5.1403	1.47335	0.592934	PF05495,PF00097	PTHR21319	KOG1940		K10144	AT5G22920.1		CHY-type/CTCHY-type/RING-type Zinc finger protein	Ubiquitin mediated proteolysis	GO:0008270 zinc ion binding;GO:0008270 zinc ion binding
Pp1s58_193V6	19	106	2.72065										0.573256	3.86434	0.736674	0	PF01738	PTHR17630	KOG3043			AT3G23600.1		alpha/beta-Hydrolases superfamily protein		GO:0016787 hydrolase activity;GO:0016787 hydrolase activity;GO:0016787 hydrolase activity;GO:0005634 nucleus;GO:0005737 cytoplasm;GO:0005886 plasma membrane;GO:0005886 plasma membrane;GO:0009651 response to salt stress;GO:0009651 response to salt stress;GO:0048046 apoplast;GO:0048046 apoplast;GO:0005829 cytosol;GO:0005829 cytosol
Pp1s68_124V6	24	132	2.70009										0.724113	4.8122	1.27244	1.03764	PF01926	PTHR11089	KOG2485			AT2G41670.1		P-loop containing nucleoside triphosphate hydrolases superfamily protein		GO:0005525 GTP binding;GO:0005525 GTP binding;GO:0005525 GTP binding;GO:0008150 biological_process;GO:0009507 chloroplast
Pp1s2_779V6	384	2075	2.67459										11.5858	75.6463	17.5128	10.6432	PF01679	PTHR21659	KOG1773			AT2G38905.1		Low temperature and salt responsive protein family		GO:0009409 response to cold;GO:0012505 endomembrane system;GO:0016021 integral to membrane;GO:0042538 hyperosmotic salinity response
Pp1s458_5V6	290	1556	2.66437										8.7497	56.7256	35.0925	28.2533		PTHR19308	KOG2761			AT4G14500.1		Polyketide cyclase/dehydrase and lipid transport superfamily protein		GO:0003674 molecular_function;GO:0008150 biological_process
Pp1s405_7V6	20	105	2.63297										0.603427	3.82788	2.61184	2.54962						AT1G73240.1				GO:0003674 molecular_function;GO:0005575 cellular_component;GO:0008150 biological_process
Pp1s80_112V6	36	189	2.63297						301	49	-2.53877		1.08617	6.89019	10.079	1.45269	PF00646					AT5G15710.1		Galactose oxidase/kelch repeat superfamily protein		GO:0003674 molecular_function;GO:0008150 biological_process
Pp1s338_62V6	21	110	2.6297										0.633599	4.01016	2.98018	1.21552	PF01758	PTHR10361	KOG2718			AT4G22840.1		Sodium Bile acid symporter family		GO:0005215 transporter activity;GO:0006814 sodium ion transport;GO:0006814 sodium ion transport;GO:0008508 bile acid:sodium symporter activity;GO:0016020 membrane;GO:0016020 membrane
Pp1s3_329V6	34	178	2.62893						150	9	-3.97876		1.02583	6.48917	5.02278	0.266821	PF00320	PTHR10071				AT4G26150.1	CGA1	cytokinin-responsive gata factor 1		GO:0003700 sequence-specific DNA binding transcription factor activity;GO:0003700 sequence-specific DNA binding transcription factor activity;GO:0009735 response to cytokinin stimulus;GO:0007623 circadian rhythm;GO:0009416 response to light stimulus;GO:0009740 gibberellic acid mediated signaling pathway;GO:0009910 negative regulation of flower development;GO:0010187 negative regulation of seed ge…
Pp1s14_353V6	23	120	2.62398						50	271	2.51843		0.693941	4.37472	1.67426	8.03426	PF01095					AT3G29090.1	PME31	pectin methylesterase 31	Pentose and glucuronate interconversions;Starch and sucrose metabolism;Metabolic pathways	GO:0005618 cell wall;GO:0009505 plant-type cell wall;GO:0030599 pectinesterase activity;GO:0030599 pectinesterase activity;GO:0045488 pectin metabolic process
Pp1s2_172V6	25	130	2.61917										0.754284	4.73928	1.90866	0.770815	PF05739	PTHR12380	KOG3202			AT1G16240.2	SYP51	syntaxin of plants 51	SNARE interactions in vesicular transport	GO:0005484 SNAP receptor activity;GO:0010008 endosome membrane;GO:0010008 endosome membrane;GO:0016192 vesicle-mediated transport;GO:0005773 vacuole;GO:0005773 vacuole
Pp1s33_217V6	20	104	2.61917										0.603427	3.79143	3.48246	2.54962	PF05879		KOG2203			AT5G45160.1		Root hair defective 3 GTP-binding protein (RHD3)		GO:0005525 GTP binding;GO:0005783 endoplasmic reticulum
Pp1s9_138V6	35	181	2.61122										1.056	6.59854	3.04715	3.23149						AT2G37570.1	SLT1	HSP20-like chaperones superfamily protein		GO:0003674 molecular_function;GO:0042538 hyperosmotic salinity response
Pp1s45_145V6	125	637	2.59002										3.77142	23.2225	19.2875	6.28511						AT3G03160.1				GO:0003674 molecular_function;GO:0006886 intracellular protein transport
Pp1s347_19V6	94	479	2.58995						326	40	-2.94666		2.83611	17.4624	10.9162	1.18587	PF07645,PF00008	PTHR11201:SF104
Pp1s149_266V6	25	125	2.56258						32	256	3.08014		0.754284	4.557	1.07153	7.58956	PF01301	PTHR23421	KOG0496	3.2.1.23	K12309	AT1G72990.1	BGAL17	beta-galactosidase 17	Galactose metabolism;Other glycan degradation;Glycosaminoglycan degradation;Sphingolipid metabolism;Glycosphingolipid biosynthesis - ganglio series;Metabolic pathways	GO:0003824 catalytic activity;GO:0003824 catalytic activity;GO:0004553 "hydrolase activity, hydrolyzing O-glycosyl compounds";GO:0004553 "hydrolase activity, hydrolyzing O-glycosyl compounds";GO:0004565 beta-galactosidase activity;GO:0005739 mitochondrion;GO:0005975 carbohydrate metabolic process;GO:0005975 carbohydrate metabolic process;GO:0012505 endomembrane system;GO:0043169 cation binding;GO…
Pp1s237_47V6	24	119	2.55051										0.724113	4.33827	1.07153	3.35008	PF00483	PTHR22572	KOG1322			AT5G19220.1	APL1	ADP glucose pyrophosphorylase large subunit 1	Starch and sucrose metabolism;Amino sugar and nucleotide sugar metabolism;Metabolic pathways	GO:0008878 glucose-1-phosphate adenylyltransferase activity;GO:0009058 biosynthetic process;GO:0009941 chloroplast envelope;GO:0009570 chloroplast stroma;GO:0009507 chloroplast;GO:0008878 glucose-1-phosphate adenylyltransferase activity;GO:0008878 glucose-1-phosphate adenylyltransferase activity;GO:0009570 chloroplast stroma
Pp1s112_139V6	21	104	2.54878										0.633599	3.79143	0.803645	0	PF00125,PF00808	PTHR10252	KOG1659			AT3G12480.1	NF-YC11	nuclear factor Y, subunit C11		GO:0003677 DNA binding;GO:0005634 nucleus;GO:0006355 "regulation of transcription, DNA-dependent";GO:0003700 sequence-specific DNA binding transcription factor activity;GO:0005829 cytosol
Pp1s188_14V6	21	104	2.54878										0.633599	3.79143	4.92232	1.09693	PF07690	PTHR11662	KOG2532			AT5G20380.1	PHT4;5	phosphate transporter 4;5		GO:0055085 transmembrane transport;GO:0016020 membrane;GO:0005315 inorganic phosphate transmembrane transporter activity;GO:0009536 plastid
Pp1s201_8V6	26	126	2.5175										0.784455	4.59346	4.58747	1.60092		PTHR22753				AT1G54570.1		Esterase/lipase/thioesterase family protein		GO:0003824 catalytic activity;GO:0016747 "transferase activity, transferring acyl groups other than amino-acyl groups";GO:0010287 plastoglobule;GO:0010287 plastoglobule;GO:0010287 plastoglobule;GO:0009507 chloroplast
Pp1s15_89V6	31	150	2.51528										0.935312	5.46841	1.8082	3.35008	PF07690	PTHR11600	KOG2615			AT3G43790.1	ZIFL2	zinc induced facilitator-like 2		GO:0005351 sugar:hydrogen symporter activity;GO:0015144 carbohydrate transmembrane transporter activity;GO:0016020 membrane;GO:0009624 response to nematode
Pp1s357_33V6	52	251	2.51176										1.56891	9.15046	4.01822	1.7788						AT3G60590.2				GO:0009706 chloroplast inner membrane;GO:0009941 chloroplast envelope;GO:0009941 chloroplast envelope;GO:0009507 chloroplast;GO:0009507 chloroplast
Pp1s512_5V6	22	106	2.50914										0.66377	3.86434	2.10957	1.71951
Pp1s112_83V6	25	120	2.50369										0.754284	4.37472	3.41549	2.54962
Pp1s58_196V6	57	273	2.50052						134	3	-5.40099		1.71977	9.9525	4.48702	0.0889402
Pp1s97_255V6	57	272	2.49523										1.71977	9.91604	5.35763	1.27481
Pp1s27_74V6	42	200	2.49219										1.2672	7.29121	5.659	5.15853	PF00838	PTHR11991	KOG1727			AT3G16640.1	TCTP	translationally controlled tumor protein		GO:0005737 cytoplasm;GO:0009579 thylakoid;GO:0005634 nucleus;GO:0046686 response to cadmium ion;GO:0042742 defense response to bacterium;GO:0005774 vacuolar membrane;GO:0005886 plasma membrane;GO:0009507 chloroplast;GO:0048046 apoplast;GO:0005515 protein binding;GO:0005515 protein binding;GO:0001558 regulation of cell growth;GO:0009860 pollen tube growth;GO:0010252 auxin homeostasis;GO:0048364 ro…
Pp1s398_25V6	37	176	2.49063										1.11634	6.41626	1.30592	0.444701	PF04433	PTHR12802				AT2G47620.1	SWI3A	SWITCH/sucrose nonfermenting 3A		GO:0003677 DNA binding;GO:0003677 DNA binding;GO:0006338 chromatin remodeling;GO:0016514 SWI/SNF complex
Pp1s141_103V6	28	131	2.46672										0.844798	4.77574	2.67882	4.80277	PF02966	PTHR12052	KOG3414		K12859	AT5G08290.1	YLS8	mRNA splicing factor, thioredoxin-like U5 snRNP	Spliceosome	GO:0003824 catalytic activity;GO:0005681 spliceosomal complex;GO:0007067 mitosis;GO:0005634 nucleus;GO:0005737 cytoplasm
Pp1s4_282V6	376	1749	2.45838										11.3444	63.7616	51.2323	12.2441	PF01476
Pp1s156_109V6	24	111	2.45011										0.724113	4.04662	4.58747	4.47666	PF04832	PTHR11220				AT3G10130.1		SOUL heme-binding family protein		GO:0005488 binding;GO:0008150 biological_process;GO:0009507 chloroplast;GO:0009535 chloroplast thylakoid membrane;GO:0009535 chloroplast thylakoid membrane;GO:0010287 plastoglobule;GO:0010287 plastoglobule;GO:0010287 plastoglobule;GO:0009507 chloroplast
Pp1s13_276V6	58	266	2.43796										1.74994	9.69731	2.0426	4.41736	PF02816	PTHR14187		2.7.11.20	K08292
Pp1s194_13V6	28	128	2.4333						37	231	2.72243		0.844798	4.66637	1.23895	6.84839						AT2G40390.1				GO:0003674 molecular_function;GO:0008150 biological_process
Pp1s350_5V6	3205	14620	2.4302										96.6992	532.987	879.087	1146.62
Pp1s29_135V6	49	223	2.42685										1.4784	8.1297	1.97563	3.82443	PF00013	PTHR12124				AT2G25910.1		3\'-5\' exonuclease domain-containing protein / K homology domain-containing protein / KH domain-containing protein		GO:0003676 nucleic acid binding;GO:0003676 nucleic acid binding;GO:0003676 nucleic acid binding;GO:0003723 RNA binding;GO:0003723 RNA binding;GO:0005622 intracellular;GO:0006139 "nucleobase, nucleoside, nucleotide and nucleic acid metabolic process";GO:0006139 "nucleobase, nucleoside, nucleotide and nucleic acid metabolic process";GO:0008408 3'-5' exonuclease activity;GO:0008408 3'-5' exonuclease…
Pp1s120_74V6	28	126	2.41058										0.844798	4.59346	0.97107	0.0592934	PF07231,PF07014					AT2G40000.1	HSPRO2	ortholog of sugar beet HS1 PRO-1 2		GO:0003674 molecular_function;GO:0009751 response to salicylic acid stimulus;GO:0009816 "defense response to bacterium, incompatible interaction";GO:0006979 response to oxidative stress
Pp1s38_172V6	26	117	2.41058										0.784455	4.26536	1.03804	0.622581	PF00646					AT1G27340.1		Galactose oxidase/kelch repeat superfamily protein		GO:0003674 molecular_function;GO:0008150 biological_process
Pp1s435_12V6	34	153	2.41058										1.02583	5.57777	1.37289	2.19386			KOG3264			AT2G22370.1				GO:0003674 molecular_function;GO:0005575 cellular_component;GO:0008150 biological_process
Pp1s6_301V6	37	165	2.39752						161	10	-3.92885		1.11634	6.01525	5.39112	0.296467	PF03824					AT4G35080.3		high-affinity nickel-transport family protein		GO:0009507 chloroplast;GO:0009507 chloroplast;GO:0009507 chloroplast;GO:0015099 nickel ion transmembrane transporter activity;GO:0015675 nickel ion transport;GO:0016021 integral to membrane;GO:0016021 integral to membrane;GO:0016021 integral to membrane;GO:0016021 integral to membrane;GO:0030001 metal ion transport;GO:0030001 metal ion transport;GO:0030001 metal ion transport;GO:0046872 metal ion…
Pp1s64_177V6	35	156	2.39677										1.056	5.68714	3.6164	2.40138						AT1G07280.3		Tetratricopeptide repeat (TPR)-like superfamily protein		GO:0005488 binding;GO:0005488 binding;GO:0005488 binding;GO:0008150 biological_process;GO:0009507 chloroplast;GO:0009507 chloroplast;GO:0009507 chloroplast
Pp1s442_22V6	346	1541	2.39568										10.4393	56.1788	24.1428	26.4745	PF00257					AT1G20450.1	ERD10	Dehydrin family protein		GO:0006950 response to stress;GO:0009409 response to cold;GO:0009415 response to water;GO:0009737 response to abscisic acid stimulus;GO:0009409 response to cold;GO:0005737 cytoplasm;GO:0009631 cold acclimation;GO:0016020 membrane;GO:0005634 nucleus;GO:0009409 response to cold;GO:0003779 actin binding;GO:0009409 response to cold;GO:0005515 protein binding;GO:0009414 response to water deprivation;G…
Pp1s21_18V6	31	137	2.38449										0.935312	4.99448	1.90866	0.415054	PF01842					AT2G39570.1		ACT domain-containing protein		GO:0008152 metabolic process;GO:0016597 amino acid binding
Pp1s257_26V6	31	136	2.37392										0.935312	4.95802	1.97563	5.78111						AT4G29420.1		F-box/RNI-like superfamily protein		GO:0003674 molecular_function;GO:0008150 biological_process
Pp1s157_51V6	138	603	2.36815						152	30	-2.2609		4.16365	21.983	5.08975	0.889402						AT4G11910.1				GO:0008150 biological_process;GO:0009507 chloroplast
Pp1s25_89V6	39	169	2.35613										1.17668	6.16107	4.11868	1.86774	PF00808	PTHR11064	KOG0869			AT4G14540.1	NF-YB3	nuclear factor Y, subunit B3		GO:0005622 intracellular;GO:0005634 nucleus;GO:0006355 "regulation of transcription, DNA-dependent";GO:0003700 sequence-specific DNA binding transcription factor activity
Pp1s293_81V6	313	1344	2.34295										9.44364	48.9969	58.0298	13.2224	PF02987	PTHR23241				AT2G42560.1		late embryogenesis abundant domain-containing protein / LEA domain-containing protein		GO:0003674 molecular_function;GO:0005575 cellular_component;GO:0009793 embryo development ending in seed dormancy
Pp1s103_94V6	72	309	2.34219										2.17234	11.2649	2.34396	3.14255	PF00686					AT5G01260.2		Carbohydrate-binding-like fold		GO:0003824 catalytic activity;GO:0003824 catalytic activity;GO:0003824 catalytic activity;GO:0005575 cellular_component;GO:0005975 carbohydrate metabolic process;GO:0005975 carbohydrate metabolic process;GO:0005975 carbohydrate metabolic process;GO:0030246 carbohydrate binding;GO:0030246 carbohydrate binding
Pp1s172_22V6	38	163	2.34146										1.14651	5.94233	3.28155	8.74578	PF02798,PF00043,PF00647	PTHR11260	KOG1627			AT1G09640.1		Translation elongation factor EF1B, gamma chain		GO:0003746 translation elongation factor activity;GO:0003746 translation elongation factor activity;GO:0003746 translation elongation factor activity;GO:0006414 translational elongation;GO:0006414 translational elongation;GO:0005886 plasma membrane;GO:0005829 cytosol
Pp1s227_122V6	445	1907	2.34008										13.4263	69.5217	57.5945	109.07	PF01781	PTHR10965	KOG3499		K02923	AT3G59540.1		Ribosomal L38e protein family	Ribosome	GO:0003735 structural constituent of ribosome;GO:0003735 structural constituent of ribosome;GO:0005840 ribosome;GO:0006412 translation;GO:0006412 translation;GO:0042254 ribosome biogenesis;GO:0022625 cytosolic large ribosomal subunit
Pp1s153_117V6	29	124	2.33687										0.87497	4.52055	2.27699	3.79478
Pp1s75_138V6	29	124	2.33687						136	0	-35.9998		0.87497	4.52055	4.55399	0	PF03330,PF01357					AT5G56320.1	EXPA14	expansin A14		GO:0005576 extracellular region;GO:0009826 unidimensional cell growth;GO:0009828 plant-type cell wall loosening;GO:0009831 plant-type cell wall modification involved in multidimensional cell growth;GO:0012505 endomembrane system;GO:0009826 unidimensional cell growth;GO:0009828 plant-type cell wall loosening
Pp1s127_93V6	26	111	2.33463						287	25	-3.44091		0.784455	4.04662	9.61025	0.741168	PF00240,PF11976	PTHR10666	KOG0005			AT1G31340.1	RUB1	related to ubiquitin 1		GO:0006464 protein modification process;GO:0045116 protein neddylation;GO:0009693 ethylene biosynthetic process;GO:0009790 embryo development;GO:0005886 plasma membrane;GO:0005829 cytosol;GO:0009733 response to auxin stimulus
Pp1s31_240V6	30	128	2.33377										0.905141	4.66637	2.31048	0.0592934	PF00010	PTHR11514				AT4G37850.1		basic helix-loop-helix (bHLH) DNA-binding superfamily protein		GO:0003677 DNA binding;GO:0005634 nucleus;GO:0003700 sequence-specific DNA binding transcription factor activity;GO:0006355 "regulation of transcription, DNA-dependent";GO:0003700 sequence-specific DNA binding transcription factor activity
Pp1s2_226V6	643	2727	2.32508										19.4002	99.4156	75.8105	32.226	PF05562					AT1G29390.1	COR314-TM2	cold regulated 314 thylakoid membrane 2		GO:0003674 molecular_function;GO:0006950 response to stress;GO:0009535 chloroplast thylakoid membrane;GO:0009631 cold acclimation;GO:0009941 chloroplast envelope;GO:0031357 integral to chloroplast inner membrane;GO:0070417 cellular response to cold
Pp1s70_252V6	92	386	2.30955										2.77577	14.072	7.43371	2.93503
Pp1s194_12V6	197	823	2.30335										5.94376	30.0033	7.4672	4.92136		PTHR12924			K13249	AT2G21160.1		Translocon-associated protein (TRAP), alpha subunit	Protein processing in endoplasmic reticulum	GO:0008150 biological_process;GO:0005773 vacuole;GO:0009535 chloroplast thylakoid membrane;GO:0009535 chloroplast thylakoid membrane;GO:0005773 vacuole;GO:0005783 endoplasmic reticulum;GO:0005774 vacuolar membrane;GO:0005774 vacuolar membrane;GO:0005886 plasma membrane;GO:0005886 plasma membrane;GO:0005886 plasma membrane;GO:0005886 plasma membrane
Pp1s281_123V6	93	388	2.30141										2.80594	14.1449	25.9845	8.21214	PF03073	PTHR10057	KOG3797			AT2G47770.1	TSPO	TSPO(outer membrane tryptophan-rich sensory protein)-related		GO:0005783 endoplasmic reticulum;GO:0005795 Golgi stack;GO:0006970 response to osmotic stress;GO:0009651 response to salt stress;GO:0009737 response to abscisic acid stimulus;GO:0016020 membrane;GO:0005783 endoplasmic reticulum;GO:0005794 Golgi apparatus;GO:0006778 porphyrin metabolic process;GO:0020037 heme binding
Pp1s293_60V6	25	104	2.29724										0.754284	3.79143	1.07153	0.592934	PF00847					AT4G23750.1	CRF2	cytokinin response factor 2		GO:0003677 DNA binding;GO:0003700 sequence-specific DNA binding transcription factor activity;GO:0005634 nucleus;GO:0006355 "regulation of transcription, DNA-dependent";GO:0003700 sequence-specific DNA binding transcription factor activity;GO:0042991 transcription factor import into nucleus;GO:0048825 cotyledon development;GO:0005515 protein binding;GO:0005634 nucleus;GO:0048364 root development
Pp1s18_306V6	75	310	2.28796										2.26285	11.3014	13.3606	8.6272	PF02987	PTHR23241				AT3G53040.1		late embryogenesis abundant protein, putative / LEA protein, putative		GO:0009793 embryo development ending in seed dormancy
Pp1s6_302V6	30	124	2.28796										0.905141	4.52055	4.11868	2.84609		PTHR13789	KOG3855	1.14.13.-	K06126	AT3G24200.2		FAD/NAD(P)-binding oxidoreductase family protein	Ubiquinone and other terpenoid-quinone biosynthesis;Metabolic pathways;Biosynthesis of secondary metabolites	GO:0004497 monooxygenase activity;GO:0004497 monooxygenase activity;GO:0004497 monooxygenase activity;GO:0006744 ubiquinone biosynthetic process;GO:0006744 ubiquinone biosynthetic process;GO:0016709 "oxidoreductase activity, acting on paired donors, with incorporation or reduction of molecular oxygen, NADH or NADPH as one donor, and incorporation of one atom of oxygen";GO:0016709 "oxidoreductase …
Pp1s45_250V6	26	107	2.28168										0.784455	3.9008	5.08975	1.21552						AT1G08480.1				GO:0003674 molecular_function;GO:0008150 biological_process;GO:0005739 mitochondrion;GO:0005739 mitochondrion;GO:0005773 vacuole;GO:0005739 mitochondrion;GO:0009536 plastid;GO:0005774 vacuolar membrane;GO:0005739 mitochondrion
Pp1s48_141V6	96	394	2.27774										2.89645	14.3637	9.97859	23.3616	PF10533					AT4G24240.1	WRKY7	WRKY DNA-binding protein 7		GO:0003700 sequence-specific DNA binding transcription factor activity;GO:0003700 sequence-specific DNA binding transcription factor activity;GO:0003700 sequence-specific DNA binding transcription factor activity;GO:0005634 nucleus;GO:0006355 "regulation of transcription, DNA-dependent";GO:0003700 sequence-specific DNA binding transcription factor activity;GO:0005515 protein binding;GO:0005516 ca…
Pp1s31_108V6	29	119	2.27749										0.87497	4.33827	2.64533	1.3341	PF01040	PTHR11048			K09833	AT2G18950.1	HPT1	homogentisate phytyltransferase 1	Ubiquinone and other terpenoid-quinone biosynthesis;Metabolic pathways;Biosynthesis of secondary metabolites	GO:0010189 vitamin E biosynthetic process;GO:0004659 prenyltransferase activity;GO:0009507 chloroplast;GO:0010176 homogentisate phytyltransferase activity;GO:0042362 fat-soluble vitamin biosynthetic process;GO:0010189 vitamin E biosynthetic process;GO:0010176 homogentisate phytyltransferase activity;GO:0009266 response to temperature stimulus;GO:0009915 phloem loading;GO:0031347 regulation of def…
Pp1s245_12V6	60	242	2.25263										1.81028	8.82236	2.54487	1.80845	PF03966,PF08241,PF08242	PTHR10108				AT2G41040.1		S-adenosyl-L-methionine-dependent methyltransferases superfamily protein		GO:0008168 methyltransferase activity;GO:0010287 plastoglobule;GO:0010287 plastoglobule;GO:0010287 plastoglobule;GO:0009507 chloroplast;GO:0080167 response to karrikin
Pp1s108_186V6	128	515	2.24908										3.86193	18.7749	6.02733	4.15054
Pp1s114_175V6	33	130	2.21863										0.995655	4.73928	1.23895	1.03764		PTHR11005				AT1G15060.1		Uncharacterised conserved protein UCP031088, alpha/beta hydrolase		GO:0009507 chloroplast
Pp1s101_203V6	42	165	2.21466										1.2672	6.01525	2.74579	0.919048	PF03005	PTHR14469				AT5G20680.1	TBL16	TRICHOME BIREFRINGENCE-LIKE 16		GO:0008150 biological_process
Pp1s197_2V6	130	508	2.20697										3.92228	18.5197	4.92232	3.1722	PF00378	PTHR11941				AT4G16800.1		ATP-dependent caseinolytic (Clp) protease/crotonase family protein	Valine, leucine and isoleucine degradation;Metabolic pathways	GO:0003824 catalytic activity;GO:0004300 enoyl-CoA hydratase activity;GO:0005739 mitochondrion;GO:0006631 fatty acid metabolic process;GO:0008152 metabolic process
Pp1s14_240V6	31	121	2.20532										0.935312	4.41118	1.84169	5.48464	PF05179	PTHR12466	KOG3786			AT3G22590.1	PHP	PLANT HOMOLOGOUS TO PARAFIBROMIN		GO:0005515 protein binding;GO:0005515 protein binding;GO:0005515 protein binding;GO:0010228 vegetative to reproductive phase transition of meristem;GO:0005634 nucleus;GO:0009911 positive regulation of flower development;GO:0010228 vegetative to reproductive phase transition of meristem;GO:0051568 histone H3-K4 methylation;GO:0070860 RNA polymerase I core factor complex
Pp1s130_167V6	29	113	2.20285										0.87497	4.11953	6.66355	2.31244						AT5G15802.1				GO:0003674 molecular_function;GO:0008150 biological_process;GO:0012505 endomembrane system
Pp1s300_66V6	47	181	2.18591										1.41805	6.59854	2.24351	1.27481	PF01842					AT1G12860.1	SCRM2	basic helix-loop-helix (bHLH) DNA-binding superfamily protein		GO:0003677 DNA binding;GO:0005634 nucleus;GO:0003700 sequence-specific DNA binding transcription factor activity;GO:0006355 "regulation of transcription, DNA-dependent";GO:0003700 sequence-specific DNA binding transcription factor activity;GO:0010444 guard mother cell differentiation;GO:0050826 response to freezing
Pp1s2_609V6	296	1139	2.18475										8.93072	41.5234	92.8209	24.9922	PF11820					AT5G63500.1		Protein of unknown function (DUF 3339)		GO:0003674 molecular_function;GO:0008150 biological_process;GO:0031225 anchored to membrane;GO:0031225 anchored to membrane
Pp1s83_247V6	633	2417	2.1736						6454	436	-3.80766		19.0985	88.1142	216.113	12.926	PF01929	PTHR11127	KOG3421		K02875	AT4G27090.1		Ribosomal protein L14	Ribosome	GO:0003735 structural constituent of ribosome;GO:0003735 structural constituent of ribosome;GO:0005840 ribosome;GO:0006412 translation;GO:0006412 translation;GO:0042254 ribosome biogenesis;GO:0009507 chloroplast;GO:0005773 vacuole;GO:0005730 nucleolus;GO:0022626 cytosolic ribosome;GO:0022626 cytosolic ribosome;GO:0022626 cytosolic ribosome;GO:0005783 endoplasmic reticulum;GO:0005774 vacuolar memb…
Pp1s30_177V6	32	122	2.17139						209	17	-3.53976		0.965484	4.44764	6.9984	0.503994	PF03870	PTHR10917	KOG3400		K03016	AT1G54250.1	NRPB8A	RNA polymerase Rpb8	Purine metabolism;Pyrimidine metabolism;Metabolic pathways;RNA polymerase	GO:0003899 DNA-directed RNA polymerase activity;GO:0006351 "transcription, DNA-dependent";GO:0006351 "transcription, DNA-dependent";GO:0005665 "DNA-directed RNA polymerase II, core complex"
Pp1s74_20V6	43	163	2.16312										1.29737	5.94233	9.9451	11.0879						AT3G60590.2				GO:0009706 chloroplast inner membrane;GO:0009941 chloroplast envelope;GO:0009941 chloroplast envelope;GO:0009507 chloroplast;GO:0009507 chloroplast
Pp1s4_56V6	81	307	2.1629						428	28	-3.85397		2.44388	11.192	14.3317	0.830108	PF01569	PTHR10165	KOG3030			AT3G02600.1	LPP3	lipid phosphate phosphatase 3		GO:0008195 phosphatidate phosphatase activity;GO:0005887 integral to plasma membrane;GO:0006644 phospholipid metabolic process;GO:0008195 phosphatidate phosphatase activity;GO:0005886 plasma membrane;GO:0005886 plasma membrane;GO:0005886 plasma membrane;GO:0005886 plasma membrane;GO:0005886 plasma membrane;GO:0005886 plasma membrane
Pp1s18_276V6	37	137	2.12923						55	488	3.22952		1.11634	4.99448	1.84169	14.4676
Pp1s163_90V6	30	111	2.12818										0.905141	4.04662	2.10957	0.474348	PF04689					AT2G37120.1		S1FA-like DNA-binding protein		GO:0003677 DNA binding;GO:0003677 DNA binding;GO:0005634 nucleus;GO:0006355 "regulation of transcription, DNA-dependent";GO:0012505 endomembrane system
Pp1s183_107V6	61	224	2.11727						50	383	3.01748		1.84045	8.16615	1.67426	11.3547		PTHR11655				AT1G33140.1	PGY2	Ribosomal protein L6 family	Ribosome	GO:0003735 structural constituent of ribosome;GO:0003735 structural constituent of ribosome;GO:0006412 translation;GO:0015934 large ribosomal subunit;GO:0019843 rRNA binding;GO:0009941 chloroplast envelope;GO:0005773 vacuole;GO:0016020 membrane;GO:0022625 cytosolic large ribosomal subunit;GO:0009955 adaxial/abaxial pattern formation;GO:0005829 cytosol
Pp1s25_169V6	585	2148	2.11714										17.6502	78.3076	21.7989	19.389	PF06094	PTHR12510	KOG4450			AT3G02910.1		AIG2-like (avirulence induced gene) family protein		GO:0003674 molecular_function;GO:0080167 response to karrikin
Pp1s32_349V6	33	121	2.11512						75	332	2.22636		0.995655	4.41118	2.51139	9.84271	PF08534,PF00578,PF10417	PTHR10681	KOG0854	1.11.1.15,1.11.1.7,3.1.1.-	K11188	AT1G48130.1	PER1	1-cysteine peroxiredoxin 1	Phenylalanine metabolism;Phenylpropanoid biosynthesis;Metabolic pathways;Biosynthesis of secondary metabolites	GO:0005575 cellular_component;GO:0016209 antioxidant activity;GO:0008379 thioredoxin peroxidase activity;GO:0009269 response to desiccation;GO:0010231 maintenance of seed dormancy
Pp1s433_16V6	28	102	2.10573										0.844798	3.71852	2.77927	0.563288	PF00076	PTHR23365	KOG4209		K14396	AT5G65260.1		RNA-binding (RRM/RBD/RNP motifs) family protein		GO:0000166 nucleotide binding;GO:0003676 nucleic acid binding;GO:0003723 RNA binding;GO:0005575 cellular_component;GO:0008150 biological_process
Pp1s336_10V6	133	481	2.09527										4.01279	17.5354	4.2861	6.87804	PF03097					AT1G73390.2		Endosomal targeting BRO1-like domain-containing protein		GO:0003674 molecular_function
Pp1s116_104V6	31	112	2.09381										0.935312	4.08308	2.44442	1.09693	PF02630	PTHR12151	KOG2792		K07152	AT3G08950.1	HCC1	electron transport SCO1/SenC family protein		GO:0005507 copper ion binding;GO:0005739 mitochondrion;GO:0008535 respiratory chain complex IV assembly;GO:0009790 embryo development
Pp1s61_92V6	54	195	2.0931										1.62925	7.10893	10.079	8.36038	PF11820					AT5G63500.1		Protein of unknown function (DUF 3339)		GO:0003674 molecular_function;GO:0008150 biological_process;GO:0031225 anchored to membrane;GO:0031225 anchored to membrane
Pp1s2_170V6	31	111	2.08088						102	17	-2.50483		0.935312	4.04662	3.41549	0.503994	PF00520,PF07885,PF00027,PF00023,PF11834	PTHR10217	KOG0498			AT2G26650.1	KT1	K+ transporter 1		GO:0005242 inward rectifier potassium channel activity;GO:0030551 cyclic nucleotide binding;GO:0005886 plasma membrane;GO:0048767 root hair elongation;GO:0009651 response to salt stress;GO:0005515 protein binding;GO:0005242 inward rectifier potassium channel activity;GO:0006813 potassium ion transport;GO:0005242 inward rectifier potassium channel activity;GO:0006813 potassium ion transport
Pp1s136_49V6	49	174	2.06889										1.4784	6.34335	1.33941	1.63057	PF00646					AT5G15710.1		Galactose oxidase/kelch repeat superfamily protein		GO:0003674 molecular_function;GO:0008150 biological_process
Pp1s288_38V6	49	173	2.06057										1.4784	6.30689	1.74123	3.1722	PF00808	PTHR11064	KOG0871			AT5G23090.2	NF-YB13	nuclear factor Y, subunit B13		GO:0003700 sequence-specific DNA binding transcription factor activity;GO:0006355 "regulation of transcription, DNA-dependent";GO:0005634 nucleus;GO:0005634 nucleus;GO:0005634 nucleus
Pp1s251_11V6	37	130	2.05357										1.11634	4.73928	3.28155	2.75715	PF02365					AT4G28500.1	NAC073	NAC domain containing protein 73		GO:0007275 multicellular organismal development;GO:0003700 sequence-specific DNA binding transcription factor activity;GO:0005634 nucleus;GO:0045893 "positive regulation of transcription, DNA-dependent";GO:2000652 regulation of secondary cell wall biogenesis
Pp1s419_10V6	224	784	2.04801										6.75839	28.5815	18.8522	23.4209	PF01477,PF00305	PTHR11771				AT1G17420.1	LOX3	lipoxygenase 3	Linoleic acid metabolism;alpha-Linolenic acid metabolism;Metabolic pathways	GO:0005506 iron ion binding;GO:0009507 chloroplast;GO:0016165 lipoxygenase activity;GO:0016702 "oxidoreductase activity, acting on single donors with incorporation of molecular oxygen, incorporation of two atoms of oxygen";GO:0046872 metal ion binding;GO:0009611 response to wounding;GO:0009644 response to high light intensity;GO:0009753 response to jasmonic acid stimulus;GO:0016165 lipoxygenase a…
Pp1s84_298V6	85	297	2.04558										2.56457	10.8274	2.00911	3.76513	PF05648	PTHR12652	KOG4186			AT1G47750.1	PEX11A	peroxin 11A		GO:0003674 molecular_function;GO:0005778 peroxisomal membrane;GO:0016559 peroxisome fission;GO:0005779 integral to peroxisomal membrane;GO:0016559 peroxisome fission;GO:0007031 peroxisome organization;GO:0005515 protein binding;GO:0005515 protein binding;GO:0005777 peroxisome;GO:0042802 identical protein binding
Pp1s313_15V6	37	129	2.04243										1.11634	4.70283	8.97403	2.69785	PF01200	PTHR10769	KOG3502		K02979	AT5G03850.1		Nucleic acid-binding, OB-fold-like protein	Ribosome	GO:0003735 structural constituent of ribosome;GO:0003735 structural constituent of ribosome;GO:0003735 structural constituent of ribosome;GO:0005840 ribosome;GO:0006407 rRNA export from nucleus;GO:0006412 translation;GO:0006412 translation;GO:0042254 ribosome biogenesis;GO:0005886 plasma membrane;GO:0005618 cell wall;GO:0022627 cytosolic small ribosomal subunit;GO:0005829 cytosol
Pp1s425_13V6	98	337	2.02255										2.95679	12.2857	2.41093	3.29079	PF07059	PTHR12136				AT5G45560.1		Pleckstrin homology (PH) domain-containing protein / lipid-binding START domain-containing protein		GO:0005739 mitochondrion;GO:0008289 lipid binding
Pp1s30_44V6	400	1374	2.02097										12.0685	50.0906	56.2886	46.0414	PF03868,PF01159	PTHR10715	KOG1694		K02934	AT1G74050.1		Ribosomal protein L6 family protein	Ribosome	GO:0003735 structural constituent of ribosome;GO:0003735 structural constituent of ribosome;GO:0005622 intracellular;GO:0005840 ribosome;GO:0006412 translation;GO:0006412 translation;GO:0005886 plasma membrane;GO:0016020 membrane;GO:0022625 cytosolic large ribosomal subunit;GO:0005515 protein binding;GO:0005829 cytosol
Pp1s30_366V6	188	640	2.00799						634	109	-2.46002		5.67222	23.3319	21.2296	3.23149
Pp1s49_140V6	50	170	2.00619										1.50857	6.19753	2.77927	0	PF00249					AT1G32240.1	KAN2	Homeodomain-like superfamily protein		GO:0003677 DNA binding;GO:0003700 sequence-specific DNA binding transcription factor activity;GO:0006355 "regulation of transcription, DNA-dependent";GO:0048440 carpel development;GO:0048481 ovule development;GO:0009944 polarity specification of adaxial/abaxial axis
Pp1s37_122V6	67	227	2.00111						327	14	-4.46565		2.02148	8.27552	10.9497	0.415054	PF02770,PF00441	PTHR10909	KOG0135	1.3.3.6	K00232	AT1G06290.1	ACX3	acyl-CoA oxidase 3	Fatty acid metabolism;alpha-Linolenic acid metabolism;Biosynthesis of unsaturated fatty acids;Metabolic pathways;Peroxisome	GO:0003997 acyl-CoA oxidase activity;GO:0005777 peroxisome;GO:0006635 fatty acid beta-oxidation;GO:0003997 acyl-CoA oxidase activity;GO:0006635 fatty acid beta-oxidation;GO:0051791 medium-chain fatty acid metabolic process
Pp1s48_117V6	343	72	-2.01148						22	154	2.88749		10.3488	2.62483	0.736674	4.5656	PF08263,PF00560,PF00069,PF07714	PTHR23258	KOG1187			AT2G31880.1	SOBIR1	Leucine-rich repeat protein kinase family protein		GO:0004674 protein serine/threonine kinase activity;GO:0005524 ATP binding;GO:0006468 protein phosphorylation;GO:0007169 transmembrane receptor protein tyrosine kinase signaling pathway;GO:0016301 kinase activity;GO:0005886 plasma membrane;GO:0005886 plasma membrane;GO:0010942 positive regulation of cell death;GO:0031349 positive regulation of defense response;GO:0004674 protein serine/threonine …
Pp1s199_24V6	167	35	-2.01377										5.03862	1.27596	0.770159	0.563288	PF06972					AT3G07660.1		Kinase-related protein of unknown function (DUF1296)		GO:0003674 molecular_function;GO:0005575 cellular_component;GO:0008150 biological_process
Pp1s28_394V6	239	50	-2.01636						31	402	3.77699		7.21096	1.8228	1.03804	11.918	PF00862,PF00534	PTHR12526	KOG0853	2.4.1.13	K00695	AT4G02280.1	SUS3	sucrose synthase 3	Starch and sucrose metabolism;Metabolic pathways	GO:0005986 sucrose biosynthetic process;GO:0008194 UDP-glycosyltransferase activity;GO:0016157 sucrose synthase activity;GO:0016757 "transferase activity, transferring glycosyl groups";GO:0016157 sucrose synthase activity;GO:0005982 starch metabolic process;GO:0005985 sucrose metabolic process;GO:0010431 seed maturation
Pp1s8_66V6	115	24	-2.01987										3.46971	0.874945	2.31048	5.455	PF00483,PF00132	PTHR22572	KOG1460			AT1G74910.2		ADP-glucose pyrophosphorylase family protein		GO:0009058 biosynthetic process;GO:0016740 transferase activity;GO:0016740 transferase activity;GO:0016740 transferase activity;GO:0016779 nucleotidyltransferase activity;GO:0016779 nucleotidyltransferase activity;GO:0016779 nucleotidyltransferase activity;GO:0016779 nucleotidyltransferase activity;GO:0005777 peroxisome;GO:0005777 peroxisome;GO:0005777 peroxisome;GO:0046686 response to cadmium io…
Pp1s13_423V6	178	37	-2.02562										5.3705	1.34887	0	0.830108	PF03641					AT3G53450.1		Putative lysine decarboxylase family protein		GO:0003674 molecular_function;GO:0005634 nucleus;GO:0005829 cytosol
Pp1s295_6V6	1721	355	-2.0367										51.9249	12.9419	5.49157	12.1848	PF00097	PTHR22763				AT5G20910.1	AIP2	RING/U-box superfamily protein		GO:0008270 zinc ion binding;GO:0005515 protein binding;GO:0005634 nucleus;GO:0004842 ubiquitin-protein ligase activity;GO:0016567 protein ubiquitination;GO:0004842 ubiquitin-protein ligase activity;GO:0004842 ubiquitin-protein ligase activity;GO:0005515 protein binding;GO:0005634 nucleus;GO:0005634 nucleus;GO:0005829 cytosol;GO:0005829 cytosol;GO:0009737 response to abscisic acid stimulus;GO:0009…
Pp1s39_217V6	345	71	-2.04005						69	309	2.24308		10.4091	2.58838	2.31048	9.16084	PF03106					AT2G47260.1	WRKY23	WRKY DNA-binding protein 23		GO:0003700 sequence-specific DNA binding transcription factor activity;GO:0003700 sequence-specific DNA binding transcription factor activity;GO:0006355 "regulation of transcription, DNA-dependent";GO:0003700 sequence-specific DNA binding transcription factor activity;GO:0003700 sequence-specific DNA binding transcription factor activity;GO:0009624 response to nematode;GO:0009733 response to auxi…
Pp1s168_84V6	1119	230	-2.04185										33.7618	8.38489	19.9572	20.8416	PF00067	PTHR19383	KOG0156	1.14.13.11	K00487	AT2G30490.1	C4H	cinnamate-4-hydroxylase	Phenylalanine metabolism;Phenylpropanoid biosynthesis;Flavonoid biosynthesis;Stilbenoid, diarylheptanoid and gingerol biosynthesis;Metabolic pathways;Biosynthesis of secondary metabolites	GO:0009505 plant-type cell wall;GO:0005783 endoplasmic reticulum;GO:0005774 vacuolar membrane;GO:0005886 plasma membrane;GO:0016020 membrane;GO:0005886 plasma membrane;GO:0009555 pollen development;GO:0009698 phenylpropanoid metabolic process;GO:0009808 lignin metabolic process;GO:0032502 developmental process;GO:0040007 growth;GO:0080167 response to karrikin;GO:0009416 response to light stimulus…
Pp1s131_152V6	336	69	-2.04314										10.1376	2.51547	2.31048	0.503994	PF02893	PTHR23319				AT1G02120.1	VAD1	GRAM domain family protein		GO:0042742 defense response to bacterium;GO:0043069 negative regulation of programmed cell death
Pp1s70_122V6	410	84	-2.04651										12.3703	3.06231	2.77927	0.681875	PF07250,PF09118					AT3G53950.1		glyoxal oxidase-related protein		GO:0003674 molecular_function;GO:0008150 biological_process
Pp1s34_308V6	371	76	-2.04669						72	274	2.00824		11.1936	2.77066	2.41093	8.1232	PF00282	PTHR11999	KOG1383	4.1.1.15	K01580	AT5G17330.1	GAD	glutamate decarboxylase	Alanine, aspartate and glutamate metabolism;beta-Alanine metabolism;Taurine and hypotaurine metabolism;Butanoate metabolism;Metabolic pathways;Biosynthesis of secondary metabolites	GO:0005516 calmodulin binding;GO:0005516 calmodulin binding;GO:0046686 response to cadmium ion;GO:0005829 cytosol;GO:0004351 glutamate decarboxylase activity;GO:0005516 calmodulin binding
Pp1s101_24V6	1497	305	-2.05454						496	22	-4.41463		45.1665	11.1191	16.6087	0.652228
Pp1s307_19V6	123	25	-2.058										3.71108	0.911401	0.736674	0.770815	PF01138,PF03725,PF03726,PF00013,PF00575	PTHR11252	KOG1067	2.7.7.8	K00962	AT3G03710.1	RIF10	polyribonucleotide nucleotidyltransferase, putative	Purine metabolism;Pyrimidine metabolism;RNA degradation	GO:0000175 3'-5'-exoribonuclease activity;GO:0000175 3'-5'-exoribonuclease activity;GO:0003676 nucleic acid binding;GO:0003723 RNA binding;GO:0003723 RNA binding;GO:0004654 polyribonucleotide nucleotidyltransferase activity;GO:0009507 chloroplast;GO:0009570 chloroplast stroma;GO:0010323 "negative regulation of isopentenyl diphosphate biosynthetic process, mevalonate-independent pathway";GO:001599…
Pp1s312_50V6	360	73	-2.06137										10.8617	2.66129	1.37289	2.04562	PF00240,PF00627	PTHR12948	KOG2561			AT2G12550.1		ubiquitin-associated (UBA)/TS-N domain-containing protein
Pp1s166_98V6	252	51	-2.0642										7.60318	1.85926	0	1.36375	PF02985		KOG1851			AT3G13330.1	PA200	proteasome activating protein 200	Proteasome	GO:0005488 binding;GO:0005575 cellular_component
Pp1s34_207V6	346	70	-2.06469										10.4393	2.55192	1.20547	0.0889402		PTHR12603				AT3G48070.2		RING/U-box superfamily protein		GO:0008270 zinc ion binding;GO:0008270 zinc ion binding
Pp1s72_306V6	964	195	-2.0649						247	2105	3.17137		29.0852	7.10893	8.27084	62.4064	PF00005,PF01061,PF08370	PTHR19241	KOG0065			AT1G59870.1	PEN3	ABC-2 and Plant PDR ABC-type transporter family protein		GO:0042626 "ATPase activity, coupled to transmembrane movement of substances";GO:0009941 chloroplast envelope;GO:0005886 plasma membrane;GO:0009507 chloroplast;GO:0005739 mitochondrion;GO:0005886 plasma membrane;GO:0009507 chloroplast;GO:0009627 systemic acquired resistance;GO:0009817 "defense response to fungus, incompatible interaction";GO:0006855 drug transmembrane transport;GO:0005886 plasma …
Pp1s178_72V6	757	152	-2.07557										22.8397	5.54132	10.4139	5.33641	PF01485,PF00098,PF00641	PTHR11685	KOG1815			AT1G65430.1	ARI8	IBR domain-containing protein		GO:0004842 ubiquitin-protein ligase activity
Pp1s26_152V6	334	67	-2.07696										10.0772	2.44255	6.42916	14.4972
Pp1s14_358V6	744	149	-2.07933										22.4475	5.43195	2.51139	6.04793						AT5G49960.1
Pp1s260_51V6	110	22	-2.08127										3.31885	0.802033	1.54032	0.296467	PF00515,PF07719	PTHR22904	KOG4648			AT1G56440.1		Tetratricopeptide repeat (TPR)-like superfamily protein		GO:0005488 binding;GO:0005488 binding;GO:0005575 cellular_component;GO:0008150 biological_process
Pp1s281_87V6	120	24	-2.08127										3.62056	0.874945	1.40638	4.68418	PF11210	PTHR10343				AT2G04039.1				GO:0003674 molecular_function;GO:0009507 chloroplast;GO:0009507 chloroplast;GO:0009507 chloroplast;GO:0009507 chloroplast;GO:0009507 chloroplast
Pp1s48_46V6	222	44	-2.09433										6.69804	1.60407	2.98018	2.60891	PF01554	PTHR11206	KOG1347			AT5G52450.1		MATE efflux family protein		GO:0005215 transporter activity;GO:0015238 drug transmembrane transporter activity;GO:0015297 antiporter activity;GO:0016020 membrane;GO:0009624 response to nematode;GO:0005774 vacuolar membrane
Pp1s68_102V6	217	43	-2.09463										6.54719	1.56761	1.40638	3.08326	PF00520,PF00027	PTHR10217	KOG0498		K05391	AT4G30560.1	CNGC9	cyclic nucleotide gated channel 9	Plant-pathogen interaction	GO:0005216 ion channel activity;GO:0005516 calmodulin binding;GO:0006811 ion transport;GO:0006811 ion transport;GO:0006813 potassium ion transport;GO:0006813 potassium ion transport;GO:0030551 cyclic nucleotide binding;GO:0055085 transmembrane transport;GO:0055085 transmembrane transport;GO:0005516 calmodulin binding;GO:0005516 calmodulin binding;GO:0016020 membrane
Pp1s61_195V6	197	39	-2.09599										5.94376	1.42179	0.368337	0.652228	PF10494			2.7.11.1	K08880	AT2G20495.1				GO:0003674 molecular_function;GO:0005575 cellular_component;GO:0008150 biological_process
Pp1s225_90V6	182	36	-2.09721										5.49119	1.31242	0.602733	0.385407	PF00069	PTHR23258	KOG1187			AT2G02800.1	APK2B	protein kinase 2B		GO:0004672 protein kinase activity;GO:0004672 protein kinase activity;GO:0004674 protein serine/threonine kinase activity;GO:0004674 protein serine/threonine kinase activity;GO:0005524 ATP binding;GO:0005524 ATP binding;GO:0006468 protein phosphorylation;GO:0006468 protein phosphorylation;GO:0016301 kinase activity;GO:0005634 nucleus;GO:0005737 cytoplasm;GO:0005886 plasma membrane;GO:0005886 plas…
Pp1s8_36V6	2023	400	-2.09777										61.0367	14.5824	8.94055	3.79478	PF02365					AT5G04410.1	NAC2	NAC domain containing protein 2		GO:0007275 multicellular organismal development;GO:0003700 sequence-specific DNA binding transcription factor activity;GO:0005634 nucleus;GO:0005737 cytoplasm;GO:0009644 response to high light intensity;GO:0009962 regulation of flavonoid biosynthetic process;GO:0045893 "positive regulation of transcription, DNA-dependent";GO:0045893 "positive regulation of transcription, DNA-dependent"
Pp1s93_33V6	152	30	-2.10038										4.58605	1.09368	0	0	PF03109,PF00144	PTHR10566	KOG1235			AT5G24810.1		ABC1 family protein		GO:0005783 endoplasmic reticulum;GO:0005886 plasma membrane
Pp1s29_184V6	264	52	-2.1033										7.96524	1.89571	2.54487	1.06728	PF07883					AT4G17050.1	UGLYAH	ureidoglycine aminohydrolase	Purine metabolism	GO:0012505 endomembrane system;GO:0003700 sequence-specific DNA binding transcription factor activity;GO:0006355 "regulation of transcription, DNA-dependent";GO:0000256 allantoin catabolic process;GO:0071522 ureidoglycine aminohydrolase activity
Pp1s42_203V6	132	26	-2.1033										3.98262	0.947857	0.0669704	0.207527	PF02207,PF00569	PTHR21725	KOG1776	6.3.2.19	K10691	AT3G02260.1	BIG	auxin transport protein (BIG)		GO:0004842 ubiquitin-protein ligase activity;GO:0005488 binding;GO:0008270 zinc ion binding;GO:0048283 indeterminate inflorescence morphogenesis;GO:0009733 response to auxin stimulus;GO:0009926 auxin polar transport;GO:0010311 lateral root formation;GO:0048364 root development;GO:0016020 membrane;GO:0009826 unidimensional cell growth;GO:0048281 inflorescence morphogenesis;GO:0009620 response to f…
Pp1s126_15V6	193	38	-2.10387										5.82307	1.38533	0.736674	1.80845	PF00076	PTHR10432	KOG0149			AT1G76460.1		RNA-binding (RRM/RBD/RNP motifs) family protein		GO:0000166 nucleotide binding;GO:0003676 nucleic acid binding;GO:0003676 nucleic acid binding;GO:0003723 RNA binding;GO:0005575 cellular_component;GO:0008150 biological_process
Pp1s193_64V6	669	131	-2.11178										20.1846	4.77574	2.14305	3.37973	PF00400	PTHR14107	KOG2394			AT3G53390.1		Transducin/WD40 repeat-like superfamily protein		GO:0000166 nucleotide binding;GO:0005575 cellular_component;GO:0008150 biological_process
Pp1s53_211V6	381	74	-2.12354										11.4953	2.69775	3.34852	2.19386	PF00890,PF02910	PTHR11632	KOG2403	1.3.5.1	K00234	AT5G66760.1	SDH1-1	succinate dehydrogenase 1-1	Citrate cycle (TCA cycle);Oxidative phosphorylation;Metabolic pathways;Biosynthesis of secondary metabolites	GO:0005739 mitochondrion;GO:0000104 succinate dehydrogenase activity;GO:0005739 mitochondrion;GO:0005749 mitochondrial respiratory chain complex II;GO:0006121 "mitochondrial electron transport, succinate to ubiquinone";GO:0005739 mitochondrion;GO:0005739 mitochondrion;GO:0005618 cell wall;GO:0005524 ATP binding;GO:0005739 mitochondrion;GO:0050897 cobalt ion binding
Pp1s165_105V6	237	46	-2.12453										7.15061	1.67698	0.736674	0.207527	PF00970,PF00175	PTHR19370	KOG0534	1.6.2.2	K00326	AT5G17770.1	CBR	NADH:cytochrome B5 reductase 1	Amino sugar and nucleotide sugar metabolism	GO:0009505 plant-type cell wall;GO:0005783 endoplasmic reticulum;GO:0004128 cytochrome-b5 reductase activity;GO:0005886 plasma membrane;GO:0004128 cytochrome-b5 reductase activity;GO:0022900 electron transport chain
Pp1s223_56V6	202	39	-2.13215						28	141	2.41233		6.09462	1.42179	0.937585	4.18019	PF03765,PF00650	PTHR10174	KOG1470			AT1G75170.2		Sec14p-like phosphatidylinositol transfer family protein		GO:0005215 transporter activity;GO:0006810 transport
Pp1s39_82V6	202	39	-2.13215										6.09462	1.42179	3.71686	2.46068	PF01704	PTHR11952	KOG2638	2.7.7.9	K00963	AT5G17310.2	UGP2	UDP-glucose pyrophosphorylase 2	Pentose and glucuronate interconversions;Galactose metabolism;Starch and sucrose metabolism;Amino sugar and nucleotide sugar metabolism;Metabolic pathways;Biosynthesis of secondary metabolites	GO:0003983 UTP:glucose-1-phosphate uridylyltransferase activity;GO:0008152 metabolic process;GO:0016779 nucleotidyltransferase activity;GO:0016779 nucleotidyltransferase activity;GO:0046686 response to cadmium ion;GO:0046686 response to cadmium ion;GO:0005886 plasma membrane;GO:0005886 plasma membrane;GO:0009651 response to salt stress;GO:0009651 response to salt stress;GO:0009555 pollen developm…
Pp1s47_286V6	192	37	-2.13485										5.7929	1.34887	2.54487	1.7788	PF01926	PTHR11089	KOG1424	3.6.1.-	K14539	AT1G08410.1		P-loop containing nucleoside triphosphate hydrolases superfamily protein	Ribosome biogenesis in eukaryotes	GO:0005525 GTP binding;GO:0005525 GTP binding;GO:0005525 GTP binding;GO:0005622 intracellular;GO:0008150 biological_process
Pp1s28_126V6	680	131	-2.13531										20.5165	4.77574	1.94214	4.92136	PF03917,PF03199	PTHR11130	KOG0021	6.3.2.3	K01920	AT5G27380.1	GSH2	glutathione synthetase 2	Glutathione metabolism;Metabolic pathways	GO:0004363 glutathione synthase activity;GO:0006750 glutathione biosynthetic process;GO:0005829 cytosol;GO:0009507 chloroplast;GO:0009753 response to jasmonic acid stimulus;GO:0005829 cytosol;GO:0004363 glutathione synthase activity;GO:0005829 cytosol;GO:0004363 glutathione synthase activity;GO:0006750 glutathione biosynthetic process
Pp1s242_76V6	462	89	-2.13536										13.9392	3.24459	0.368337	1.27481	PF05743,PF09454	PTHR23306	KOG2391		K12183	AT5G13860.1	ELC-Like	ELCH-like	Endocytosis	GO:0006464 protein modification process;GO:0015031 protein transport;GO:0019787 small conjugating protein ligase activity;GO:0043687 post-translational protein modification;GO:0051246 regulation of protein metabolic process;GO:0000813 ESCRT I complex
Pp1s234_88V6	376	72	-2.14401										11.3444	2.62483	1.70774	2.57926		PTHR10887	KOG1801			AT2G19120.1		P-loop containing nucleoside triphosphate hydrolases superfamily protein		GO:0003674 molecular_function;GO:0008150 biological_process
Pp1s66_172V6	26187	5006	-2.14646						3319	236061	6.2324		790.098	182.499	111.137	6998.44	PF02798,PF00043	PTHR11260	KOG0867			AT2G30860.1	GSTF9	glutathione S-transferase PHI 9	Glutathione metabolism	GO:0004364 glutathione transferase activity;GO:0009579 thylakoid;GO:0005737 cytoplasm;GO:0009407 toxin catabolic process;GO:0043295 glutathione binding;GO:0005773 vacuole;GO:0005507 copper ion binding;GO:0004364 glutathione transferase activity;GO:0004602 glutathione peroxidase activity;GO:0006952 defense response;GO:0009579 thylakoid;GO:0009579 thylakoid;GO:0042742 defense response to bacterium;…
Pp1s13_229V6	518	99	-2.1468						51	198	2.03707		15.6288	3.60915	1.70774	5.87005	PF03798	PTHR12560	KOG1607			AT3G25540.1	LAG1	TRAM, LAG1 and CLN8 (TLC) lipid-sensing domain containing protein		GO:0003674 molecular_function;GO:0005886 plasma membrane;GO:0005783 endoplasmic reticulum;GO:0005794 Golgi apparatus
Pp1s112_154V6	110	21	-2.14839										3.31885	0.765577	0.803645	0.503994	PF00643,PF06203					AT1G68520.1		B-box type zinc finger protein with CCT domain		GO:0005622 intracellular;GO:0008270 zinc ion binding;GO:0003700 sequence-specific DNA binding transcription factor activity;GO:0006355 "regulation of transcription, DNA-dependent"
Pp1s227_70V6	110	21	-2.14839										3.31885	0.765577	0	1.51198						AT5G39360.1	EDL2	EID1-like 2		GO:0003674 molecular_function;GO:0005575 cellular_component;GO:0008150 biological_process
Pp1s99_12V6	152	29	-2.14929										4.58605	1.05723	0	0.859755	PF00069,PF07714	PTHR22986	KOG0198			AT3G13530.1	MAPKKK7	mitogen-activated protein kinase kinase kinase 7		GO:0004672 protein kinase activity;GO:0004674 protein serine/threonine kinase activity;GO:0005488 binding;GO:0005524 ATP binding;GO:0016301 kinase activity;GO:0005829 cytosol;GO:0005886 plasma membrane;GO:0007009 plasma membrane organization;GO:0009555 pollen development;GO:0005886 plasma membrane
Pp1s58_240V6	698	133	-2.15115										21.0596	4.84865	1.94214	0.503994	PF05116,PF08472	PTHR12526:SF2				AT2G35840.3		Sucrose-6F-phosphate phosphohydrolase family protein		GO:0000287 magnesium ion binding;GO:0000287 magnesium ion binding;GO:0000287 magnesium ion binding;GO:0003824 catalytic activity;GO:0003824 catalytic activity;GO:0003824 catalytic activity;GO:0005986 sucrose biosynthetic process;GO:0016791 phosphatase activity;GO:0016791 phosphatase activity;GO:0016791 phosphatase activity;GO:0050307 sucrose-phosphatase activity;GO:0050307 sucrose-phosphatase act…
Pp1s33_40V6	730	138	-2.16257										22.0251	5.03093	8.1369	18.2031	PF03959	PTHR22778	KOG2551			AT4G24380.1
Pp1s59_140V6	328	62	-2.1627										9.89621	2.26027	0.770159	0.326114	PF00481	PTHR13832	KOG0698			AT2G33700.1		Protein phosphatase 2C family protein		GO:0003824 catalytic activity;GO:0004722 protein serine/threonine phosphatase activity;GO:0004722 protein serine/threonine phosphatase activity;GO:0006470 protein dephosphorylation
Pp1s230_64V6	254	48	-2.16307										7.66353	1.74989	0	0.0889402	PF00926,PF00925	PTHR21327	KOG1284	3.5.4.25,4.1.99.12	K14652	AT5G64300.1	GCH	GTP cyclohydrolase II	Riboflavin metabolism;Metabolic pathways	GO:0003935 GTP cyclohydrolase II activity;GO:0008686 "3,4-dihydroxy-2-butanone-4-phosphate synthase activity";GO:0009231 riboflavin biosynthetic process;GO:0003935 GTP cyclohydrolase II activity;GO:0008686 "3,4-dihydroxy-2-butanone-4-phosphate synthase activity";GO:0009231 riboflavin biosynthetic process;GO:0016020 membrane;GO:0009507 chloroplast;GO:0003935 GTP cyclohydrolase II activity;GO:00092…
Pp1s16_111V6	265	50	-2.16534										7.99541	1.8228	0.569248	0.296467	PF00804,PF05739	PTHR19957	KOG0810		K08486	AT1G61290.1	SYP124	syntaxin of plants 124	SNARE interactions in vesicular transport	GO:0005484 SNAP receptor activity;GO:0006886 intracellular protein transport;GO:0006944 cellular membrane fusion;GO:0005886 plasma membrane;GO:0009860 pollen tube growth;GO:0030133 transport vesicle
Pp1s288_56V6	106	20	-2.16534										3.19816	0.729121	1.97563	1.21552	PF00067	PTHR19383	KOG0156			AT5G07990.1	TT7	Cytochrome P450 superfamily protein	Flavonoid biosynthesis;Flavone and flavonol biosynthesis;Metabolic pathways;Biosynthesis of secondary metabolites	GO:0016711 flavonoid 3'-monooxygenase activity;GO:0019825 oxygen binding;GO:0009411 response to UV;GO:0009813 flavonoid biosynthetic process;GO:0016711 flavonoid 3'-monooxygenase activity;GO:0009733 response to auxin stimulus
Pp1s175_59V6	509	96	-2.1659										15.3572	3.49978	2.84624	2.57926	PF06200	PTHR23418:SF2				AT4G32570.1	TIFY8	TIFY domain protein 8		GO:0005575 cellular_component;GO:0008150 biological_process;GO:0005515 protein binding
Pp1s235_24V6	138	26	-2.16743										4.16365	0.947857	2.14305	0	PF00643					AT1G78600.2	LZF1	light-regulated zinc finger protein 1		GO:0008270 zinc ion binding;GO:0003700 sequence-specific DNA binding transcription factor activity;GO:0006355 "regulation of transcription, DNA-dependent";GO:0009658 chloroplast organization;GO:0009718 anthocyanin biosynthetic process;GO:0015995 chlorophyll biosynthetic process;GO:0010099 regulation of photomorphogenesis;GO:0016607 nuclear speck;GO:0009641 shade avoidance;GO:0009641 shade avoidan…
Pp1s86_95V6	117	22	-2.17028						42	163	2.03655		3.53005	0.802033	1.40638	4.83242	PF00069,PF00433	PTHR22985	KOG0605			AT4G14350.1		AGC (cAMP-dependent, cGMP-dependent and protein kinase C) kinase family protein		GO:0004672 protein kinase activity;GO:0005524 ATP binding;GO:0006468 protein phosphorylation;GO:0006468 protein phosphorylation;GO:0006468 protein phosphorylation;GO:0006468 protein phosphorylation;GO:0016301 kinase activity;GO:0005634 nucleus;GO:0005737 cytoplasm;GO:0009524 phragmoplast;GO:0005886 plasma membrane;GO:0005886 plasma membrane;GO:0005886 plasma membrane;GO:0005829 cytosol
Pp1s25_106V6	181	34	-2.17173										5.46102	1.23951	0.301367	2.46068						AT2G03810.2		18S pre-ribosomal assembly protein gar2-related		GO:0003674 molecular_function;GO:0005886 plasma membrane;GO:0005886 plasma membrane;GO:0005886 plasma membrane;GO:0005886 plasma membrane
Pp1s119_145V6	160	30	-2.17438										4.82742	1.09368	0.0669704	0.0592934
Pp1s36_12V6	1281	240	-2.17551										38.6495	8.74945	3.382	6.43334	PF01643					AT4G13050.1		Acyl-ACP thioesterase	Fatty acid biosynthesis	GO:0000036 acyl carrier activity;GO:0006633 fatty acid biosynthetic process;GO:0009507 chloroplast
Pp1s197_32V6	316	59	-2.18048										9.53415	2.15091	1.8082	2.34209	PF04733	PTHR10805	KOG3081			AT1G30630.1		Coatomer epsilon subunit		GO:0005198 structural molecule activity;GO:0005488 binding;GO:0006890 "retrograde vesicle-mediated transport, Golgi to ER";GO:0006890 "retrograde vesicle-mediated transport, Golgi to ER";GO:0008565 protein transporter activity;GO:0005774 vacuolar membrane;GO:0005829 cytosol
Pp1s33_21V6	466	87	-2.18059										14.0599	3.17168	4.78838	6.22581	PF04043,PF01095					AT5G53370.1	PMEPCRF	pectin methylesterase PCR fragment F		GO:0005618 cell wall;GO:0042545 cell wall modification;GO:0030599 pectinesterase activity
Pp1s179_14V6	547	102	-2.18232										16.5037	3.71852	2.27699	0.0592934	PF00023	PTHR18958				AT3G58760.1		Integrin-linked protein kinase family		GO:0006468 protein phosphorylation;GO:0009966 regulation of signal transduction;GO:0016301 kinase activity;GO:0004712 protein serine/threonine/tyrosine kinase activity;GO:0005886 plasma membrane
Pp1s17_68V6	108	20	-2.1923										3.25851	0.729121	2.64533	0.503994	PF04857	PTHR10797	KOG0304		K12581	AT1G80780.3		Polynucleotidyl transferase, ribonuclease H-like superfamily protein	RNA degradation	GO:0003676 nucleic acid binding;GO:0003676 nucleic acid binding;GO:0003676 nucleic acid binding;GO:0004540 ribonuclease activity;GO:0009451 RNA modification
Pp1s65_78V6	108	20	-2.1923										3.25851	0.729121	0.569248	0.326114						AT4G12070.1				GO:0008150 biological_process;GO:0005886 plasma membrane
Pp1s75_107V6	2124	393	-2.19353						194	20690	6.81687		64.084	14.3272	6.49613	613.391	PF02798,PF00043	PTHR11260	KOG0867			AT2G30870.1	GSTF10	glutathione S-transferase PHI 10		GO:0004364 glutathione transferase activity;GO:0005737 cytoplasm;GO:0009407 toxin catabolic process;GO:0043295 glutathione binding;GO:0005773 vacuole;GO:0005618 cell wall;GO:0046686 response to cadmium ion;GO:0005507 copper ion binding;GO:0005886 plasma membrane;GO:0009507 chloroplast;GO:0048046 apoplast;GO:0005515 protein binding;GO:0005507 copper ion binding;GO:0005829 cytosol;GO:0009414 respon…
Pp1s5_307V6	125	23	-2.20157										3.77142	0.838489	0.133941	1.57128						AT5G45660.1				GO:0003674 molecular_function;GO:0003674 molecular_function;GO:0008150 biological_process;GO:0012505 endomembrane system
Pp1s330_22V6	310	57	-2.20258										9.35312	2.07799	1.1385	2.19386	PF01467	PTHR12039	KOG3199			AT5G55810.1	NMNAT	nicotinate/nicotinamide mononucleotide adenyltransferase	Nicotinate and nicotinamide metabolism;Metabolic pathways	GO:0000309 nicotinamide-nucleotide adenylyltransferase activity;GO:0005575 cellular_component;GO:0009058 biosynthetic process;GO:0000309 nicotinamide-nucleotide adenylyltransferase activity;GO:0004515 nicotinate-nucleotide adenylyltransferase activity;GO:0009435 NAD biosynthetic process;GO:0009555 pollen development;GO:0009860 pollen tube growth
Pp1s74_161V6	207	38	-2.2049										6.24547	1.38533	0	0.0889402	PF00249					AT2G01060.1		myb-like HTH transcriptional regulator family protein		GO:0003700 sequence-specific DNA binding transcription factor activity;GO:0003700 sequence-specific DNA binding transcription factor activity;GO:0006355 "regulation of transcription, DNA-dependent"
Pp1s80_45V6	376	69	-2.20541										11.3444	2.51547	1.23895	3.6169	PF04535					AT2G36330.1		Uncharacterised protein family (UPF0497)		GO:0003674 molecular_function;GO:0016020 membrane;GO:0005886 plasma membrane
Pp1s123_164V6	109	20	-2.2056										3.28868	0.729121	0.234396	1.27481	PF00069,PF07714	PTHR23258	KOG1187			AT3G13690.1		Protein kinase protein with adenine nucleotide alpha hydrolases-like domain		GO:0005575 cellular_component;GO:0016301 kinase activity;GO:0004674 protein serine/threonine kinase activity;GO:0046777 protein autophosphorylation
Pp1s136_15V6	274	50	-2.21352										8.26695	1.8228	0.468793	0.17788	PF00168	PTHR10774:SF2				AT3G14590.2	NTMC2T6.2	Calcium-dependent lipid-binding (CaLB domain) family protein		GO:0009507 chloroplast
Pp1s13_120V6	148	27	-2.21391										4.46536	0.984313	2.54487	5.75146	PF04419	PTHR13596				AT3G24100.1		Uncharacterised protein family SERF		GO:0003674 molecular_function;GO:0008150 biological_process
Pp1s24_275V6	296	54	-2.21391										8.93072	1.96863	0.502278	2.93503	PF00646,PF07646,PF01344	PTHR23230				AT2G44130.1		Galactose oxidase/kelch repeat superfamily protein		GO:0003674 molecular_function;GO:0005575 cellular_component;GO:0008150 biological_process
Pp1s127_120V6	176	32	-2.21878										5.31016	1.16659	2.31048	0.355761	PF01535	PTHR10483				AT4G30825.1		Tetratricopeptide repeat (TPR)-like superfamily protein		GO:0003674 molecular_function;GO:0005634 nucleus;GO:0007049 cell cycle;GO:0005515 protein binding
Pp1s376_46V6	473	86	-2.21878										14.2711	3.13522	1.20547	0.681875	PF07059					AT5G35180.1		Protein of unknown function (DUF1336)		GO:0007165 signal transduction;GO:0035091 phosphatidylinositol binding;GO:0005886 plasma membrane;GO:0005886 plasma membrane;GO:0005886 plasma membrane;GO:0005829 cytosol;GO:0005829 cytosol;GO:0005829 cytosol;GO:0005829 cytosol
Pp1s41_132V6	1007	183	-2.21949										30.3826	6.67145	16.8096	12.5109
Pp1s93_52V6	348	63	-2.22501										10.4996	2.29673	2.31048	1.74916	PF01148	PTHR13773				AT2G45150.1	CDS4	cytidinediphosphate diacylglycerol synthase 4		GO:0004605 phosphatidate cytidylyltransferase activity;GO:0008654 phospholipid biosynthetic process;GO:0016020 membrane;GO:0004605 phosphatidate cytidylyltransferase activity;GO:0009536 plastid
Pp1s295_46V6	172	31	-2.23141										5.18947	1.13014	2.31048	2.51997	PF02091,PF02092			6.1.1.14	K14164	AT3G48110.1	EDD1	glycine-tRNA ligases	Aminoacyl-tRNA biosynthesis	GO:0009507 chloroplast;GO:0009570 chloroplast stroma;GO:0005739 mitochondrion;GO:0009507 chloroplast;GO:0009793 embryo development ending in seed dormancy;GO:0009507 chloroplast;GO:0009570 chloroplast stroma;GO:0004820 glycine-tRNA ligase activity;GO:0006426 glycyl-tRNA aminoacylation;GO:0009507 chloroplast;GO:0045995 regulation of embryonic development
Pp1s185_126V6	558	100	-2.23961										16.8356	3.6456	2.34396	4.74348
Pp1s29_323V6	527	94	-2.24641										15.9003	3.42687	1.03804	1.51198	PF00481	PTHR13832	KOG0698			AT1G68410.2		Protein phosphatase 2C family protein		GO:0003824 catalytic activity;GO:0003824 catalytic activity;GO:0004722 protein serine/threonine phosphatase activity;GO:0005575 cellular_component;GO:0008150 biological_process
Pp1s29_76V6	101	18	-2.24763										3.04731	0.656209	0.368337	0.474348		PTHR22936:SF1				AT1G01550.2	BPS1	Protein of unknown function (DUF793)		GO:0003674 molecular_function;GO:0048364 root development;GO:0048367 shoot development;GO:0005886 plasma membrane;GO:0005886 plasma membrane
Pp1s17_312V6	174	31	-2.24809										5.24982	1.13014	0.133941	0.118587	PF01513	PTHR20275	KOG2178			AT1G21640.1	NADK2	NAD kinase 2		GO:0003951 NAD+ kinase activity;GO:0008152 metabolic process;GO:0008152 metabolic process;GO:0019363 pyridine nucleotide biosynthetic process;GO:0003951 NAD+ kinase activity;GO:0005516 calmodulin binding;GO:0009507 chloroplast
Pp1s188_107V6	135	24	-2.2512										4.07313	0.874945	0.0669704	0.0592934	PF00249	PTHR12374				AT5G47390.1		myb-like transcription factor family protein		GO:0003677 DNA binding;GO:0003700 sequence-specific DNA binding transcription factor activity;GO:0006355 "regulation of transcription, DNA-dependent";GO:0009651 response to salt stress;GO:0009723 response to ethylene stimulus;GO:0009737 response to abscisic acid stimulus;GO:0009739 response to gibberellin stimulus;GO:0009751 response to salicylic acid stimulus;GO:0009753 response to jasmonic acid…
Pp1s78_97V6	152	27	-2.25238										4.58605	0.984313	2.14305	2.01598
Pp1s100_108V6	715	127	-2.25246										21.5725	4.62992	2.41093	2.69785	PF04981	PTHR12746	KOG2613		K07562	AT2G03820.1		nonsense-mediated mRNA decay NMD3 family protein	Ribosome biogenesis in eukaryotes;RNA transport	GO:0000184 "nuclear-transcribed mRNA catabolic process, nonsense-mediated decay";GO:0003674 molecular_function;GO:0005829 cytosol
Pp1s412_7V6	141	25	-2.25504										4.25416	0.911401	1.67426	0.978342	PF03055	PTHR10543	KOG1285	1.13.11.51	K09840	AT1G78390.1	NCED9	nine-cis-epoxycarotenoid dioxygenase 9	Carotenoid biosynthesis;Metabolic pathways;Biosynthesis of secondary metabolites	GO:0045549 9-cis-epoxycarotenoid dioxygenase activity;GO:0009570 chloroplast stroma;GO:0009688 abscisic acid biosynthetic process;GO:0045549 9-cis-epoxycarotenoid dioxygenase activity
Pp1s88_68V6	198	35	-2.25942										5.97393	1.27596	0.234396	0.415054						AT3G62010.1				GO:0005829 cytosol
Pp1s135_47V6	317	56	-2.26033						56	299	2.49678		9.56432	2.04154	1.87517	8.86437	PF01612	PTHR13620				AT4G13870.1	WRNEXO	Werner syndrome-like exonuclease		GO:0003676 nucleic acid binding;GO:0005622 intracellular;GO:0005622 intracellular;GO:0005622 intracellular;GO:0006139 "nucleobase, nucleoside, nucleotide and nucleic acid metabolic process";GO:0006139 "nucleobase, nucleoside, nucleotide and nucleic acid metabolic process";GO:0008408 3'-5' exonuclease activity;GO:0005515 protein binding;GO:0008408 3'-5' exonuclease activity;GO:0005515 protein bind…
Pp1s63_61V6	289	51	-2.26184										8.71952	1.85926	3.81731	2.43103	PF00155	PTHR11751	KOG0257			AT1G77670.1		Pyridoxal phosphate (PLP)-dependent transferases superfamily protein		GO:0003824 catalytic activity;GO:0008483 transaminase activity;GO:0009058 biosynthetic process;GO:0016769 "transferase activity, transferring nitrogenous groups";GO:0016847 1-aminocyclopropane-1-carboxylate synthase activity;GO:0030170 pyridoxal phosphate binding
Pp1s249_22V6	330	58	-2.26769										9.95655	2.11445	1.07153	0.118587	PF03171	PTHR10209	KOG0143			AT5G05600.1		2-oxoglutarate (2OG) and Fe(II)-dependent oxygenase superfamily protein		GO:0005506 iron ion binding;GO:0016491 oxidoreductase activity;GO:0080167 response to karrikin
Pp1s99_129V6	1208	212	-2.26983										36.447	7.72868	7.03189	18.3217	PF03637	PTHR22599	KOG0440		K06685	AT5G45550.1		Mob1/phocein family protein		GO:0008150 biological_process;GO:0005634 nucleus
Pp1s288_52V6	114	20	-2.27031										3.43954	0.729121	0.200911	0.0592934	PF03009	PTHR22958	KOG2421			AT3G02040.1	SRG3	senescence-related gene 3		GO:0006071 glycerol metabolic process;GO:0006071 glycerol metabolic process;GO:0006629 lipid metabolic process;GO:0008081 phosphoric diester hydrolase activity;GO:0008889 glycerophosphodiester phosphodiesterase activity;GO:0008889 glycerophosphodiester phosphodiesterase activity
Pp1s154_81V6	120	21	-2.27392										3.62056	0.765577	1.43986	0.148234	PF01764		KOG4569			AT5G18640.1		alpha/beta-Hydrolases superfamily protein		GO:0004806 triglyceride lipase activity;GO:0004806 triglyceride lipase activity;GO:0006629 lipid metabolic process;GO:0006629 lipid metabolic process
Pp1s321_30V6	448	78	-2.2813						15	511	5.17043		13.5168	2.84357	0.502278	15.1495	PF00690,PF00122,PF00702	PTHR11939	KOG0205	3.6.3.6	K01535	AT2G07560.1	HA6	H(+)-ATPase 6	Oxidative phosphorylation	GO:0006754 ATP biosynthetic process;GO:0006812 cation transport;GO:0008152 metabolic process;GO:0016887 ATPase activity;GO:0016020 membrane;GO:0005886 plasma membrane;GO:0005515 protein binding
Pp1s1_60V6	569	99	-2.28227						25	276	3.54481		17.1675	3.60915	0.83713	8.1825	PF00664,PF00005	PTHR19242	KOG0058			AT5G39040.1	TAP2	transporter associated with antigen processing protein 2		GO:0005215 transporter activity;GO:0005886 plasma membrane;GO:0006200 ATP catabolic process;GO:0015421 oligopeptide-transporting ATPase activity;GO:0016021 integral to membrane;GO:0035672 ;GO:0042626 "ATPase activity, coupled to transmembrane movement of substances";GO:0055085 transmembrane transport;GO:0005215 transporter activity;GO:0005773 vacuole;GO:0005773 vacuole;GO:0000325 plant-type vacuo…
Pp1s114_133V6	478	83	-2.28517										14.4219	3.02585	0.770159	1.63057	PF00232	PTHR10353	KOG0626			AT1G26560.1	BGLU40	beta glucosidase 40	Cyanoamino acid metabolism;Starch and sucrose metabolism;Phenylpropanoid biosynthesis;Biosynthesis of secondary metabolites	GO:0003824 catalytic activity;GO:0004553 "hydrolase activity, hydrolyzing O-glycosyl compounds";GO:0004553 "hydrolase activity, hydrolyzing O-glycosyl compounds";GO:0005975 carbohydrate metabolic process;GO:0043169 cation binding;GO:0009507 chloroplast;GO:0048046 apoplast
Pp1s35_319V6	121	21	-2.28589										3.65074	0.765577	0.0669704	0.148234	PF01842	PTHR13734:SF1				AT1G76990.1	ACR3	ACT domain repeat 3		GO:0006807 nitrogen compound metabolic process;GO:0006807 nitrogen compound metabolic process;GO:0006807 nitrogen compound metabolic process;GO:0006807 nitrogen compound metabolic process;GO:0006807 nitrogen compound metabolic process;GO:0008152 metabolic process;GO:0008152 metabolic process;GO:0008152 metabolic process;GO:0008152 metabolic process;GO:0008152 metabolic process;GO:0005829 cytosol;…
Pp1s68_104V6	2983	517	-2.28787						124	1626	3.79305		90.0012	18.8478	4.15216	48.2056	PF01554	PTHR11206	KOG1347			AT5G52450.1		MATE efflux family protein		GO:0005215 transporter activity;GO:0015238 drug transmembrane transporter activity;GO:0015297 antiporter activity;GO:0016020 membrane;GO:0009624 response to nematode;GO:0005774 vacuolar membrane
Pp1s106_27V6	202	35	-2.28827										6.09462	1.27596	2.51139	0.444701
Pp1s75_252V6	168	29	-2.29368										5.06879	1.05723	0	0	PF07719,PF00515,PF07721	PTHR23083				AT3G04240.1	SEC	Tetratricopeptide repeat (TPR)-like superfamily protein	Other types of O-glycan biosynthesis	GO:0006493 protein O-linked glycosylation;GO:0016757 "transferase activity, transferring glycosyl groups";GO:0016757 "transferase activity, transferring glycosyl groups";GO:0006493 protein O-linked glycosylation;GO:0016757 "transferase activity, transferring glycosyl groups";GO:0016757 "transferase activity, transferring glycosyl groups"
Pp1s99_95V6	885	152	-2.30095										26.7017	5.54132	14.0303	3.14255	PF00504	PTHR21649				AT2G05070.1	LHCB2.2	photosystem II light harvesting complex gene 2.2	Photosynthesis - antenna proteins;Metabolic pathways	GO:0009765 "photosynthesis, light harvesting";GO:0015979 photosynthesis;GO:0016168 chlorophyll binding;GO:0030076 light-harvesting complex;GO:0009941 chloroplast envelope;GO:0009535 chloroplast thylakoid membrane;GO:0009507 chloroplast;GO:0009535 chloroplast thylakoid membrane;GO:0009535 chloroplast thylakoid membrane;GO:0010287 plastoglobule;GO:0005774 vacuolar membrane;GO:0009507 chloroplast;GO…
Pp1s179_27V6	112	19	-2.31877										3.37919	0.692665	2.4779	0.978342	PF00989,PF08447,PF00069	PTHR22985	KOG0610	2.7.11.1	K08282	AT5G58140.2	PHOT2	phototropin 2		GO:0016301 kinase activity;GO:0004674 protein serine/threonine kinase activity;GO:0009638 phototropism;GO:0010118 stomatal movement;GO:0009902 chloroplast relocation;GO:0016020 membrane;GO:0016301 kinase activity;GO:0009637 response to blue light;GO:0010181 FMN binding;GO:0046777 protein autophosphorylation;GO:0005794 Golgi apparatus;GO:0009882 blue light photoreceptor activity;GO:0010362 negativ…
Pp1s53_36V6	1338	226	-2.32503										40.3693	8.23906	3.8508	9.48695	PF00083,PF07690	PTHR11600	KOG0252		K08176	AT3G54700.1	PHT1;7	phosphate transporter 1;7		GO:0005351 sugar:hydrogen symporter activity;GO:0006810 transport;GO:0006817 phosphate transport;GO:0015114 phosphate transmembrane transporter activity;GO:0015144 carbohydrate transmembrane transporter activity;GO:0016020 membrane;GO:0055085 transmembrane transport;GO:0005886 plasma membrane;GO:0005886 plasma membrane
Pp1s33_163V6	397	67	-2.32625										11.978	2.44255	2.44442	1.48234	PF00350,PF01926,PF01031,PF00169,PF02212	PTHR11566	KOG0446			AT1G59610.1	DL3	dynamin-like 3		GO:0003924 GTPase activity;GO:0005886 plasma membrane;GO:0005773 vacuole;GO:0005886 plasma membrane;GO:0005886 plasma membrane;GO:0005515 protein binding;GO:0005515 protein binding;GO:0005886 plasma membrane;GO:0030276 clathrin binding;GO:0045334 clathrin-coated endocytic vesicle;GO:0048488 synaptic vesicle endocytosis;GO:0009737 response to abscisic acid stimulus
Pp1s199_35V6	184	31	-2.32871										5.55153	1.13014	0.770159	0.503994	PF00226,PF01556	PTHR11821	KOG0714			AT2G20560.1		DNAJ heat shock family protein		GO:0006457 protein folding;GO:0006457 protein folding;GO:0031072 heat shock protein binding;GO:0051082 unfolded protein binding
Pp1s34_387V6	386	65	-2.32943										11.6461	2.36964	4.85535	3.35008	PF00140,PF04542,PF04539,PF08281,PF04545					AT1G08540.1	SIG2	RNApolymerase sigma subunit 2		GO:0003677 DNA binding;GO:0003700 sequence-specific DNA binding transcription factor activity;GO:0003899 DNA-directed RNA polymerase activity;GO:0006355 "regulation of transcription, DNA-dependent";GO:0009507 chloroplast;GO:0009637 response to blue light;GO:0010114 response to red light;GO:0006352 "transcription initiation, DNA-dependent";GO:0016987 sigma factor activity
Pp1s110_41V6	202	34	-2.33009										6.09462	1.23951	1.30592	2.49032	PF12371
Pp1s12_395V6	101	17	-2.33009										3.04731	0.619753	0.435307	0.326114	PF00909	PTHR11730	KOG0682			AT2G38290.1	AMT2	ammonium transporter 2		GO:0008519 ammonium transmembrane transporter activity;GO:0005886 plasma membrane;GO:0015398 high affinity secondary active ammonium transmembrane transporter activity;GO:0015696 ammonium transport;GO:0009624 response to nematode;GO:0005886 plasma membrane;GO:0005886 plasma membrane
Pp1s89_145V6	125	21	-2.33281										3.77142	0.765577	1.27244	0		PTHR10499:SF86
Pp1s186_60V6	346	58	-2.33599										10.4393	2.11445	3.21458	0.0592934						AT4G26880.1		Stigma-specific Stig1 family protein		GO:0003674 molecular_function;GO:0008150 biological_process;GO:0012505 endomembrane system
Pp1s57_85V6	609	102	-2.33722										18.3744	3.71852	1.47335	1.3934	PF02519					AT5G20810.2		SAUR-like auxin-responsive protein family	Plant hormone signal transduction	GO:0005516 calmodulin binding;GO:0009733 response to auxin stimulus;GO:0005516 calmodulin binding;GO:0005777 peroxisome;GO:0005777 peroxisome;GO:0005515 protein binding;GO:0005515 protein binding;GO:0005515 protein binding;GO:0005515 protein binding;GO:0005515 protein binding;GO:0005515 protein binding;GO:0005515 protein binding
Pp1s27_248V6	1157	193	-2.34306										34.9083	7.03601	3.95125	4.15054	PF02861,PF00004,PF07724,PF07728,PF10431	PTHR11638	KOG1051			AT5G51070.1	ERD1	Clp ATPase		GO:0000166 nucleotide binding;GO:0005524 ATP binding;GO:0005524 ATP binding;GO:0009507 chloroplast;GO:0016887 ATPase activity;GO:0017111 nucleoside-triphosphatase activity;GO:0009570 chloroplast stroma;GO:0009941 chloroplast envelope;GO:0009507 chloroplast
Pp1s225_19V6	156	26	-2.34431										4.70673	0.947857	0.435307	0.681875	PF08137
Pp1s28_28V6	709	118	-2.34634										21.3915	4.30181	4.08519	1.24516	PF08392,PF02797,PF08541					AT1G19440.1	KCS4	3-ketoacyl-CoA synthase 4		GO:0003824 catalytic activity;GO:0016747 "transferase activity, transferring acyl groups other than amino-acyl groups";GO:0000038 very long-chain fatty acid metabolic process;GO:0042335 cuticle development
Pp1s172_32V6	199	33	-2.35157										6.0041	1.20305	0.870615	0.711521	PF00612,PF02179					AT2G46240.1	BAG6	BCL-2-associated athanogene 6		GO:0006915 apoptosis;GO:0042981 regulation of apoptosis;GO:0005515 protein binding;GO:0005516 calmodulin binding;GO:0012502 induction of programmed cell death;GO:0009408 response to heat;GO:0009409 response to cold;GO:0010228 vegetative to reproductive phase transition of meristem;GO:0050832 defense response to fungus;GO:0009408 response to heat;GO:0009644 response to high light intensity;GO:0042…
Pp1s457_19V6	169	28	-2.35287										5.09896	1.02077	1.20547	1.54163	PF01263	PTHR11122				AT5G66530.2		Galactose mutarotase-like superfamily protein		GO:0003824 catalytic activity;GO:0003824 catalytic activity;GO:0004034 aldose 1-epimerase activity;GO:0005975 carbohydrate metabolic process;GO:0005975 carbohydrate metabolic process;GO:0006012 galactose metabolic process;GO:0016853 isomerase activity;GO:0016853 isomerase activity;GO:0030246 carbohydrate binding;GO:0030246 carbohydrate binding;GO:0005515 protein binding;GO:0009570 chloroplast str…
Pp1s44_153V6	103	17	-2.35838						24	134	2.56126		3.10765	0.619753	0.803645	3.97266	PF04564,PF00514,PF02985	PTHR22849				AT3G46510.1	PUB13	plant U-box 13		GO:0004842 ubiquitin-protein ligase activity;GO:0016567 protein ubiquitination;GO:0005634 nucleus;GO:0005634 nucleus;GO:0005737 cytoplasm;GO:0005829 cytosol;GO:0070696 transmembrane receptor protein serine/threonine kinase binding;GO:0070696 transmembrane receptor protein serine/threonine kinase binding;GO:0070696 transmembrane receptor protein serine/threonine kinase binding;GO:0070696 transmemb…
Pp1s308_4V6	128	21	-2.36703										3.86193	0.765577	1.70774	0
Pp1s78_76V6	171	28	-2.36984										5.1593	1.02077	2.17654	4.62489	PF11793,PF00097	PTHR22764				AT4G28890.1		RING/U-box superfamily protein		GO:0008270 zinc ion binding;GO:0012505 endomembrane system;GO:0004842 ubiquitin-protein ligase activity;GO:0016567 protein ubiquitination
Pp1s114_31V6	172	28	-2.37825										5.18947	1.02077	0.9041	0.17788	PF00365	PTHR13697		2.7.1.11	K00850	AT2G22480.1	PFK5	phosphofructokinase 5	Glycolysis / Gluconeogenesis;Pentose phosphate pathway;Fructose and mannose metabolism;Galactose metabolism;Metabolic pathways;Biosynthesis of secondary metabolites	GO:0003872 6-phosphofructokinase activity;GO:0005945 6-phosphofructokinase complex;GO:0006096 glycolysis;GO:0003872 6-phosphofructokinase activity;GO:0006096 glycolysis;GO:0009507 chloroplast
Pp1s1_221V6	166	27	-2.3795										5.00845	0.984313	0.83713	0.681875	PF01197					AT1G75350.1	emb2184	Ribosomal protein L31		GO:0003735 structural constituent of ribosome;GO:0003735 structural constituent of ribosome;GO:0005840 ribosome;GO:0006412 translation;GO:0009793 embryo development ending in seed dormancy;GO:0042254 ribosome biogenesis;GO:0009941 chloroplast envelope;GO:0009570 chloroplast stroma;GO:0009507 chloroplast
Pp1s38_53V6	1914	311	-2.38095										57.748	11.3378	4.65444	8.86437	PF00097	PTHR22763				AT3G16720.1	ATL2	TOXICOS EN LEVADURA 2		GO:0008270 zinc ion binding;GO:0008270 zinc ion binding;GO:0006952 defense response;GO:0010200 response to chitin
Pp1s65_181V6	290	47	-2.38466										8.7497	1.71343	1.03804	0.592934		PTHR11014:SF1				AT4G38225.3				GO:0003674 molecular_function;GO:0008150 biological_process;GO:0009507 chloroplast;GO:0009507 chloroplast;GO:0009507 chloroplast
Pp1s30_317V6	494	80	-2.38578										14.9047	2.91648	1.70774	0.0889402
Pp1s22_253V6	173	28	-2.38662										5.21965	1.02077	0.334852	1.36375						AT1G66970.2	SVL2	SHV3-like 2		GO:0006071 glycerol metabolic process;GO:0006071 glycerol metabolic process;GO:0006071 glycerol metabolic process;GO:0006629 lipid metabolic process;GO:0006629 lipid metabolic process;GO:0008889 glycerophosphodiester phosphodiesterase activity;GO:0016301 kinase activity;GO:0031225 anchored to membrane;GO:0031225 anchored to membrane;GO:0046658 anchored to plasma membrane;GO:0009507 chloroplast;GO…
Pp1s31_252V6	136	22	-2.38738										4.10331	0.802033	1.20547	0.592934	PF00069,PF07714	PTHR22986	KOG0198	2.7.11.25	K13414	AT4G08500.1	MEKK1	MAPK/ERK kinase kinase 1	Plant-pathogen interaction	GO:0016301 kinase activity;GO:0046686 response to cadmium ion;GO:0006970 response to osmotic stress;GO:0006970 response to osmotic stress;GO:0009651 response to salt stress;GO:0004709 MAP kinase kinase kinase activity;GO:0005515 protein binding;GO:0009611 response to wounding;GO:0003677 DNA binding;GO:0005515 protein binding;GO:0005634 nucleus;GO:0019900 kinase binding;GO:0004674 protein serine/t…
Pp1s59_53V6	211	34	-2.39298										6.36616	1.23951	0.334852	1.12658	PF05057	PTHR12482	KOG4372			AT1G29120.1		Hydrolase-like protein family		GO:0003674 molecular_function;GO:0008150 biological_process;GO:0009507 chloroplast;GO:0009507 chloroplast;GO:0009507 chloroplast;GO:0009507 chloroplast;GO:0009507 chloroplast
Pp1s10_389V6	317	51	-2.39526										9.56432	1.85926	4.55399	1.42304	PF01245	PTHR15680	KOG1698			AT5G11750.1		Ribosomal protein L19 family protein		GO:0003735 structural constituent of ribosome;GO:0003735 structural constituent of ribosome;GO:0005622 intracellular;GO:0005840 ribosome;GO:0005840 ribosome;GO:0006412 translation;GO:0006412 translation;GO:0042254 ribosome biogenesis
Pp1s55_207V6	230	37	-2.39538										6.93941	1.34887	1.17198	1.66022	PF02383	PTHR11200	KOG1889			AT3G51460.1	RHD4	Phosphoinositide phosphatase family protein		GO:0004439 "phosphatidylinositol-4,5-bisphosphate 5-phosphatase activity";GO:0005886 plasma membrane;GO:0031520 plasma membrane of cell tip;GO:0043812 phosphatidylinositol-4-phosphate phosphatase activity;GO:0048768 root hair cell tip growth;GO:0090404 pollen tube tip
Pp1s130_99V6	430	69	-2.39901										12.9737	2.51547	0.669704	0.711521	PF01842,PF07714,PF00069	PTHR23257	KOG0192			AT4G38470.1		ACT-like protein tyrosine kinase family protein		GO:0004672 protein kinase activity;GO:0004712 protein serine/threonine/tyrosine kinase activity;GO:0005829 cytosol
Pp1s300_43V6	537	86	-2.40186						4	1479	8.61054		16.202	3.13522	0.133941	43.8475	PF00804,PF05739	PTHR19957	KOG0810			AT1G61290.1	SYP124	syntaxin of plants 124	SNARE interactions in vesicular transport	GO:0005484 SNAP receptor activity;GO:0006886 intracellular protein transport;GO:0006944 cellular membrane fusion;GO:0005886 plasma membrane;GO:0009860 pollen tube growth;GO:0030133 transport vesicle
Pp1s119_138V6	100	16	-2.4032										3.01714	0.583297	0.0669704	0	PF01055	PTHR22762	KOG1065			AT1G68560.1	XYL1	alpha-xylosidase 1		GO:0004553 "hydrolase activity, hydrolyzing O-glycosyl compounds";GO:0009044 "xylan 1,4-beta-xylosidase activity";GO:0009507 chloroplast;GO:0045493 xylan catabolic process;GO:0046556 alpha-N-arabinofuranosidase activity;GO:0005618 cell wall;GO:0048046 apoplast;GO:0009505 plant-type cell wall;GO:0009505 plant-type cell wall;GO:0046686 response to cadmium ion;GO:0010411 xyloglucan metabolic process…
Pp1s44_193V6	821	131	-2.40716						195	18	-3.35727		24.7707	4.77574	6.52961	0.533641	PF00275	PTHR21090	KOG0692	2.5.1.19	K00800	AT2G45300.1		RNA 3\'-terminal phosphate cyclase/enolpyruvate transferase, alpha/beta	Phenylalanine, tyrosine and tryptophan biosynthesis;Metabolic pathways;Biosynthesis of secondary metabolites	GO:0009507 chloroplast;GO:0005829 cytosol;GO:0003866 3-phosphoshikimate 1-carboxyvinyltransferase activity;GO:0009073 aromatic amino acid family biosynthetic process;GO:0009423 chorismate biosynthetic process;GO:0009507 chloroplast;GO:0018920 glyphosate metabolic process
Pp1s69_45V6	113	18	-2.4096										3.40936	0.656209	0.736674	0.237174	PF00571	PTHR11911				AT4G34120.1	LEJ1	Cystathionine beta-synthase (CBS) family protein		GO:0003674 molecular_function;GO:0008150 biological_process;GO:0009507 chloroplast;GO:0009507 chloroplast;GO:0009570 chloroplast stroma
Pp1s355_56V6	157	25	-2.41011										4.7369	0.911401	3.24806	0.681875	PF05739	PTHR12791	KOG3385		K08504	AT3G58170.1	BS14A	BET1P/SFT1P-like protein 14A	SNARE interactions in vesicular transport	GO:0006888 ER to Golgi vesicle-mediated transport;GO:0008565 protein transporter activity;GO:0005484 SNAP receptor activity;GO:0005886 plasma membrane;GO:0005634 nucleus
Pp1s185_139V6	107	17	-2.41335										3.22834	0.619753	0	0.148234	PF00097	PTHR22764				AT2G20030.1		RING/U-box superfamily protein		GO:0008270 zinc ion binding;GO:0008270 zinc ion binding;GO:0012505 endomembrane system
Pp1s300_55V6	963	153	-2.41335						82	442	2.51049		29.055	5.57777	2.74579	13.1039	PF02861,PF00004,PF07724,PF07728,PF10431	PTHR11638	KOG1051			AT1G74310.1	HSP101	heat shock protein 101		GO:0005524 ATP binding;GO:0016887 ATPase activity;GO:0009408 response to heat;GO:0043335 protein unfolding;GO:0009408 response to heat;GO:0009408 response to heat;GO:0009644 response to high light intensity;GO:0042542 response to hydrogen peroxide;GO:0009408 response to heat;GO:0005515 protein binding;GO:0009408 response to heat;GO:0009408 response to heat
Pp1s20_41V6	208	33	-2.41539										6.27564	1.20305	1.23895	1.8381						AT4G30780.1				GO:0003674 molecular_function;GO:0005575 cellular_component;GO:0008150 biological_process
Pp1s130_79V6	511	81	-2.41667										15.4176	2.95294	8.27084	2.69785	PF07876					AT2G32500.1		Stress responsive alpha-beta barrel domain protein		GO:0003674 molecular_function;GO:0008150 biological_process
Pp1s26_282V6	101	16	-2.41756										3.04731	0.583297	0	0.474348	PF02701					AT5G60850.1	OBP4	OBF binding protein 4		GO:0003677 DNA binding;GO:0005575 cellular_component;GO:0003700 sequence-specific DNA binding transcription factor activity;GO:0006355 "regulation of transcription, DNA-dependent";GO:0003700 sequence-specific DNA binding transcription factor activity
Pp1s66_76V6	101	16	-2.41756										3.04731	0.583297	0	0.0592934	PF02190	PTHR14255	KOG1400		K11793	AT2G25740.1		ATP-dependent protease La (LON) domain protein		GO:0004176 ATP-dependent peptidase activity;GO:0004176 ATP-dependent peptidase activity;GO:0005575 cellular_component;GO:0006508 proteolysis
Pp1s6_285V6	449	71	-2.42017										13.5469	2.58838	0.267882	0.118587	PF04784	PTHR23054				AT3G13000.2		Protein of unknown function, DUF547		GO:0003700 sequence-specific DNA binding transcription factor activity;GO:0006355 "regulation of transcription, DNA-dependent";GO:0005773 vacuole;GO:0005773 vacuole
Pp1s12_128V6	4976	786	-2.42173						157	3238	4.4464		150.133	28.6544	5.25717	95.9961	PF00753	PTHR11935				AT4G33540.1		metallo-beta-lactamase family protein		GO:0003824 catalytic activity;GO:0008152 metabolic process;GO:0009507 chloroplast;GO:0016787 hydrolase activity;GO:0046685 response to arsenic-containing substance
Pp1s112_221V6	114	18	-2.42231										3.43954	0.656209	0.870615	1.09693	PF03859,PF01833,PF00612	PTHR23335				AT2G22300.1	SR1	signal responsive 1		GO:0005634 nucleus;GO:0005634 nucleus;GO:0005516 calmodulin binding;GO:0005516 calmodulin binding;GO:0006355 "regulation of transcription, DNA-dependent";GO:0009607 response to biotic stimulus
Pp1s169_145V6	171	27	-2.42231						39	153	2.05212		5.1593	0.984313	1.30592	4.53595	PF01497
Pp1s316_69V6	159	25	-2.42837										4.79725	0.911401	2.17654	0.207527	PF01571,PF08669	PTHR13847	KOG2770			AT1G60990.2		Glycine cleavage T-protein family		GO:0004047 aminomethyltransferase activity;GO:0004047 aminomethyltransferase activity;GO:0004047 aminomethyltransferase activity;GO:0004047 aminomethyltransferase activity;GO:0006546 glycine catabolic process;GO:0006546 glycine catabolic process;GO:0006546 glycine catabolic process;GO:0009507 chloroplast;GO:0009507 chloroplast;GO:0009507 chloroplast
Pp1s63_208V6	299	47	-2.42876										9.02124	1.71343	0.502278	1.98633	PF00069	PTHR11295	KOG0668	2.7.11.1	K03097	AT2G23070.1		Protein kinase superfamily protein	Ribosome biogenesis in eukaryotes;Circadian rhythm - plant	GO:0004672 protein kinase activity;GO:0004674 protein serine/threonine kinase activity;GO:0005524 ATP binding;GO:0006468 protein phosphorylation;GO:0016301 kinase activity;GO:0005829 cytosol
Pp1s23_285V6	223	35	-2.43096						26	110	2.16106		6.72821	1.27596	0.870615	3.26114	PF00300	PTHR11931	KOG0235			AT1G22170.1		Phosphoglycerate mutase family protein		GO:0003824 catalytic activity;GO:0003824 catalytic activity;GO:0006096 glycolysis;GO:0008152 metabolic process;GO:0008152 metabolic process;GO:0009507 chloroplast;GO:0016868 "intramolecular transferase activity, phosphotransferases"
Pp1s29_322V6	123	19	-2.45393										3.71108	0.692665	0.602733	0.118587	PF03006	PTHR20855				AT4G37680.2	HHP4	heptahelical protein 4		GO:0016021 integral to membrane;GO:0016021 integral to membrane;GO:0004872 receptor activity;GO:0009725 response to hormone stimulus;GO:0009744 response to sucrose stimulus
Pp1s258_81V6	175	27	-2.45567										5.27999	0.984313	0.100456	0.533641	PF00450	PTHR11802	KOG1283	3.4.16.-	K09646	AT2G27920.1	SCPL51	serine carboxypeptidase-like 51		GO:0004185 serine-type carboxypeptidase activity;GO:0004185 serine-type carboxypeptidase activity;GO:0004185 serine-type carboxypeptidase activity;GO:0004185 serine-type carboxypeptidase activity;GO:0005739 mitochondrion;GO:0006508 proteolysis;GO:0006508 proteolysis;GO:0006508 proteolysis;GO:0006508 proteolysis;GO:0012505 endomembrane system
Pp1s76_48V6	520	80	-2.45978						201	18	-3.40099		15.6891	2.91648	6.73052	0.533641	PF00139					AT3G53380.1		Concanavalin A-like lectin protein kinase family protein		GO:0006468 protein phosphorylation;GO:0016301 kinase activity;GO:0016301 kinase activity;GO:0030246 carbohydrate binding;GO:0005886 plasma membrane;GO:0005886 plasma membrane
Pp1s103_129V6	189	29	-2.46361						4	659	7.44427		5.70239	1.05723	0.133941	19.5372	PF03171	PTHR10209	KOG0143	1.14.11.12	K05282	AT3G55970.1	JRG21	jasmonate-regulated gene 21		GO:0005506 iron ion binding;GO:0005575 cellular_component;GO:0016491 oxidoreductase activity;GO:0055114 oxidation-reduction process
Pp1s61_255V6	163	25	-2.46422										4.91793	0.911401	1.00456	1.18587	PF05697,PF05698					AT5G55220.1		trigger factor type chaperone family protein		GO:0003755 peptidyl-prolyl cis-trans isomerase activity;GO:0006457 protein folding;GO:0006457 protein folding;GO:0015031 protein transport;GO:0009941 chloroplast envelope;GO:0009941 chloroplast envelope;GO:0009570 chloroplast stroma;GO:0009507 chloroplast
Pp1s229_29V6	313	48	-2.4644										9.44364	1.74989	4.05171	1.7788	PF02403,PF00587	PTHR11778	KOG2509	6.1.1.11	K01875	AT1G11870.2	SRS	Seryl-tRNA synthetase	Aminoacyl-tRNA biosynthesis	GO:0004828 serine-tRNA ligase activity;GO:0006434 seryl-tRNA aminoacylation;GO:0043039 tRNA aminoacylation;GO:0004828 serine-tRNA ligase activity;GO:0005739 mitochondrion;GO:0007005 mitochondrion organization;GO:0009507 chloroplast;GO:0009658 chloroplast organization;GO:0005739 mitochondrion;GO:0009507 chloroplast;GO:0048481 ovule development;GO:0009507 chloroplast;GO:0009507 chloroplast;GO:00095…
Pp1s209_41V6	137	21	-2.46506										4.13348	0.765577	0.0669704	0.0592934	PF05627					AT3G25070.1	RIN4	RPM1 interacting protein 4	Plant-pathogen interaction	GO:0009816 "defense response to bacterium, incompatible interaction";GO:0005515 protein binding;GO:0006468 protein phosphorylation;GO:0016020 membrane;GO:0005515 protein binding;GO:0009626 plant-type hypersensitive response;GO:0005886 plasma membrane;GO:0005886 plasma membrane;GO:0016020 membrane;GO:0002237 response to molecule of bacterial origin;GO:0010204 "defense response signaling pathway, r…
Pp1s223_112V6	111	17	-2.4663										3.34902	0.619753	0.234396	0.0592934	PF03641				K06966	AT3G53450.1		Putative lysine decarboxylase family protein		GO:0003674 molecular_function;GO:0005634 nucleus;GO:0005829 cytosol
Pp1s90_223V6	222	34	-2.4663										6.69804	1.23951	0.803645	2.78679	PF04564,PF00514,PF02985	PTHR22849				AT1G76390.2		ARM repeat superfamily protein		GO:0004842 ubiquitin-protein ligase activity;GO:0004842 ubiquitin-protein ligase activity;GO:0005488 binding;GO:0005488 binding;GO:0016567 protein ubiquitination;GO:0016567 protein ubiquitination;GO:0005886 plasma membrane;GO:0005886 plasma membrane;GO:0005886 plasma membrane;GO:0005886 plasma membrane
Pp1s526_2V6	118	18	-2.47206										3.56022	0.656209	0	0.0592934	PF00012	PTHR19375	KOG0100		K03283	AT5G02500.1	HSC70-1	heat shock cognate protein 70-1	Spliceosome;Protein processing in endoplasmic reticulum;Endocytosis	GO:0005524 ATP binding;GO:0005524 ATP binding;GO:0005829 cytosol;GO:0006457 protein folding;GO:0009408 response to heat;GO:0005634 nucleus;GO:0009409 response to cold;GO:0009507 chloroplast;GO:0005730 nucleolus;GO:0009615 response to virus;GO:0022626 cytosolic ribosome;GO:0005515 protein binding;GO:0005515 protein binding;GO:0005618 cell wall;GO:0046686 response to cadmium ion;GO:0005774 vacuolar…
Pp1s174_37V6	2817	428	-2.47782						92	1143	3.71519		84.9927	15.6032	3.08064	33.8862	PF00226,PF00684,PF01556	PTHR11821	KOG0712			AT5G22060.1	J2	DNAJ homologue 2		GO:0005524 ATP binding;GO:0006457 protein folding;GO:0031072 heat shock protein binding;GO:0051082 unfolded protein binding;GO:0005886 plasma membrane;GO:0005829 cytosol;GO:0006457 protein folding;GO:0006457 protein folding
Pp1s215_28V6	488	74	-2.48063										14.7236	2.69775	0.669704	2.40138	PF00155	PTHR11751	KOG0258	2.6.1.2	K00814	AT1G70580.3	AOAT2	alanine-2-oxoglutarate aminotransferase 2	Alanine, aspartate and glutamate metabolism;Carbon fixation in photosynthetic organisms;Metabolic pathways	GO:0004021 L-alanine:2-oxoglutarate aminotransferase activity;GO:0009853 photorespiration;GO:0005777 peroxisome;GO:0005777 peroxisome;GO:0005777 peroxisome;GO:0005777 peroxisome;GO:0004021 L-alanine:2-oxoglutarate aminotransferase activity;GO:0008453 alanine-glyoxylate transaminase activity;GO:0047958 glycine:2-oxoglutarate aminotransferase activity;GO:0005777 peroxisome;GO:0047958 glycine:2-oxog…
Pp1s72_298V6	516	78	-2.48517						11	516	5.63193		15.5684	2.84357	0.368337	15.2977	PF00641	PTHR12920				AT1G55915.1		zinc ion binding		GO:0005622 intracellular;GO:0008150 biological_process;GO:0008270 zinc ion binding
Pp1s81_237V6	545	82	-2.4919										16.4434	2.98939	3.64989	8.50861	PF00514,PF02985	PTHR19316	KOG2160		K09562	AT3G09350.1	Fes1A	Fes1A		GO:0005737 cytoplasm;GO:0009408 response to heat;GO:0009651 response to salt stress;GO:0030544 Hsp70 protein binding;GO:0005634 nucleus;GO:0005737 cytoplasm
Pp1s206_45V6	173	26	-2.49353										5.21965	0.947857	2.84624	0.0889402
Pp1s150_120V6	193	29	-2.49382										5.82307	1.05723	2.91321	0	PF04674					AT4G08950.1	EXO	Phosphate-responsive 1 family protein		GO:0003674 molecular_function;GO:0005618 cell wall;GO:0009505 plant-type cell wall;GO:0009505 plant-type cell wall;GO:0009741 response to brassinosteroid stimulus;GO:0005829 cytosol
Pp1s63_95V6	759	114	-2.49441										22.9001	4.15599	1.50683	3.6169	PF00089	PTHR22939	KOG1320	3.4.21.-	K01362	AT4G18370.1	DEG5	DEGP protease 5		GO:0003824 catalytic activity;GO:0004252 serine-type endopeptidase activity;GO:0006508 proteolysis;GO:0008236 serine-type peptidase activity;GO:0009543 chloroplast thylakoid lumen;GO:0031977 thylakoid lumen;GO:0009543 chloroplast thylakoid lumen;GO:0009579 thylakoid;GO:0009507 chloroplast;GO:0009579 thylakoid;GO:0009543 chloroplast thylakoid lumen;GO:0010206 photosystem II repair;GO:0009507 chlor…
Pp1s227_62V6	353	53	-2.49495										10.6505	1.93217	4.25262	4.18019	PF03798					AT5G14280.1		DNA-binding storekeeper protein-related		GO:0008150 biological_process;GO:0016021 integral to membrane;GO:0006355 "regulation of transcription, DNA-dependent"
Pp1s124_70V6	120	18	-2.49631										3.62056	0.656209	0.569248	2.54962	PF00224,PF02887	PTHR11817	KOG2323	2.7.1.40	K00873	AT5G08570.1		Pyruvate kinase family protein	Glycolysis / Gluconeogenesis;Purine metabolism;Pyruvate metabolism;Carbon fixation in photosynthetic organisms;Metabolic pathways;Biosynthesis of secondary metabolites	GO:0000287 magnesium ion binding;GO:0003824 catalytic activity;GO:0004743 pyruvate kinase activity;GO:0004743 pyruvate kinase activity;GO:0006096 glycolysis;GO:0006096 glycolysis;GO:0030955 potassium ion binding;GO:0005829 cytosol
Pp1s142_86V6	120	18	-2.49631										3.62056	0.656209	0	0.681875	PF03081	PTHR12542	KOG2344		K07195	AT1G72470.1	EXO70D1	exocyst subunit exo70 family protein D1		GO:0000145 exocyst;GO:0006887 exocytosis;GO:0006904 vesicle docking involved in exocytosis;GO:0005829 cytosol
Pp1s223_99V6	180	27	-2.49631						0	127	35.9811		5.43085	0.984313	0	3.76513	PF00855,PF00628,PF00385,PF00176,PF00271,PF06465,PF00249	PTHR10799	KOG0383			AT5G44800.1	CHR4	chromatin remodeling 4		GO:0003676 nucleic acid binding;GO:0003677 DNA binding;GO:0003677 DNA binding;GO:0003682 chromatin binding;GO:0003682 chromatin binding;GO:0004386 helicase activity;GO:0004386 helicase activity;GO:0005524 ATP binding;GO:0005524 ATP binding;GO:0006333 chromatin assembly or disassembly;GO:0006333 chromatin assembly or disassembly;GO:0006355 "regulation of transcription, DNA-dependent";GO:0008270 zi…
Pp1s33_197V6	180	27	-2.49631						30	348	3.61619		5.43085	0.984313	1.00456	10.3171	PF00106	PTHR19410	KOG0725			AT4G05530.1	IBR1	indole-3-butyric acid response 1	Metabolic pathways;Peroxisome	GO:0003824 catalytic activity;GO:0005488 binding;GO:0016491 oxidoreductase activity;GO:0016491 oxidoreductase activity;GO:0005777 peroxisome;GO:0005777 peroxisome;GO:0080024 indolebutyric acid metabolic process;GO:0080026 response to indolebutyric acid stimulus;GO:0005777 peroxisome;GO:0048767 root hair elongation
Pp1s51_318V6	220	33	-2.49631										6.6377	1.20305	0.9041	1.95668	PF00125,PF00808	PTHR10252	KOG1657			AT1G56170.2	NF-YC2	nuclear factor Y, subunit C2		GO:0003677 DNA binding;GO:0005634 nucleus;GO:0006355 "regulation of transcription, DNA-dependent";GO:0003700 sequence-specific DNA binding transcription factor activity;GO:0005634 nucleus;GO:0005737 cytoplasm;GO:0005515 protein binding;GO:0045893 "positive regulation of transcription, DNA-dependent";GO:0003700 sequence-specific DNA binding transcription factor activity;GO:0006355 "regulation of t…
Pp1s122_170V6	409	61	-2.50456						9	449	5.72078		12.3401	2.22382	0.301367	13.3114	PF00664,PF00005	PTHR19242	KOG0054			AT3G62700.1	MRP10	multidrug resistance-associated protein 10		GO:0006810 transport;GO:0055085 transmembrane transport;GO:0042626 "ATPase activity, coupled to transmembrane movement of substances";GO:0005773 vacuole;GO:0005773 vacuole;GO:0000325 plant-type vacuole;GO:0005774 vacuolar membrane;GO:0005774 vacuolar membrane
Pp1s60_221V6	121	18	-2.50828										3.65074	0.656209	0	0.681875	PF00226	PTHR11821	KOG1789			AT2G26890.1	GRV2	DNAJ heat shock N-terminal domain-containing protein		GO:0005488 binding;GO:0006457 protein folding;GO:0031072 heat shock protein binding;GO:0005773 vacuole;GO:0006897 endocytosis;GO:0009660 amyloplast organization;GO:0009958 positive gravitropism;GO:0009959 negative gravitropism;GO:0005792 microsome;GO:0007032 endosome organization;GO:0009793 embryo development ending in seed dormancy;GO:0006623 protein targeting to vacuole;GO:0005770 late endosome…
Pp1s159_160V6	122	18	-2.52016										3.68091	0.656209	3.21458	0.326114						AT3G46550.1	SOS5	Fasciclin-like arabinogalactan family protein		GO:0031225 anchored to membrane;GO:0006950 response to stress;GO:0007155 cell adhesion;GO:0009825 multidimensional cell growth;GO:0009897 external side of plasma membrane;GO:0030247 polysaccharide binding;GO:0031225 anchored to membrane;GO:0046658 anchored to plasma membrane;GO:0005886 plasma membrane;GO:0005886 plasma membrane
Pp1s4_33V6	211	31	-2.52625										6.36616	1.13014	0.167426	0.533641	PF02182	PTHR22884:SF20				AT5G47150.1		YDG/SRA domain-containing protein		GO:0003674 molecular_function;GO:0005575 cellular_component;GO:0008150 biological_process
Pp1s24_206V6	805	118	-2.52955						136	24	-2.42236		24.2879	4.30181	4.55399	0.711521	PF04727	PTHR12771				AT3G03610.1		ELMO/CED-12 family protein		GO:0003674 molecular_function;GO:0006909 phagocytosis
Pp1s55_273V6	553	81	-2.53063										16.6848	2.95294	0.770159	2.31244	PF03600	PTHR10283	KOG2639			AT1G02260.1		Divalent ion symporter		GO:0005215 transporter activity;GO:0012505 endomembrane system;GO:0015137 citrate transmembrane transporter activity;GO:0015746 citrate transport;GO:0016021 integral to membrane;GO:0016021 integral to membrane;GO:0055085 transmembrane transport
Pp1s28_12V6	321	47	-2.53119						97	379	2.04628		9.68501	1.71343	3.24806	11.2361	PF00069,PF07714,PF00627,PF02149	PTHR22982	KOG0583			AT3G01090.2	KIN10	SNF1 kinase homolog 10		GO:0004672 protein kinase activity;GO:0004672 protein kinase activity;GO:0005515 protein binding;GO:0005515 protein binding;GO:0005515 protein binding;GO:0000152 nuclear ubiquitin ligase complex;GO:0004672 protein kinase activity;GO:0005515 protein binding;GO:0005515 protein binding;GO:0005515 protein binding;GO:0005515 protein binding;GO:0003006 developmental process involved in reproduction;GO:…
Pp1s37_28V6	117	17	-2.54225										3.53005	0.619753	0	0	PF00097,PF00400	PTHR22847	KOG0265			AT2G32950.1	COP1	Transducin/WD40 repeat-like superfamily protein	Ubiquitin mediated proteolysis	GO:0009640 photomorphogenesis;GO:0005634 nucleus;GO:0000152 nuclear ubiquitin ligase complex;GO:0005634 nucleus;GO:0009640 photomorphogenesis;GO:0009647 skotomorphogenesis;GO:0005515 protein binding;GO:0005515 protein binding;GO:0005515 protein binding;GO:0005515 protein binding;GO:0005515 protein binding;GO:0005515 protein binding;GO:0005515 protein binding;GO:0005515 protein binding;GO:0005515 …
Pp1s169_58V6	248	36	-2.54362										7.4825	1.31242	0.167426	1.45269	PF00501	PTHR11968	KOG1175			AT1G55320.1	AAE18	acyl-activating enzyme 18		GO:0003824 catalytic activity;GO:0003824 catalytic activity;GO:0008152 metabolic process;GO:0016874 ligase activity;GO:0005777 peroxisome;GO:0009850 auxin metabolic process
Pp1s65_16V6	255	37	-2.54424										7.6937	1.34887	1.47335	4.29877	PF00561	PTHR10992	KOG4178			AT5G58310.1	MES18	methyl esterase 18		GO:0005575 cellular_component;GO:0016787 hydrolase activity;GO:0016788 "hydrolase activity, acting on ester bonds";GO:0080030 methyl indole-3-acetate esterase activity
Pp1s311_79V6	462	67	-2.545										13.9392	2.44255	6.3287	5.92934	PF00155	PTHR13693	KOG1358			AT4G36480.1	LCB1	long-chain base1	Sphingolipid metabolism;Metabolic pathways	GO:0004758 serine C-palmitoyltransferase activity;GO:0030148 sphingolipid biosynthetic process;GO:0005783 endoplasmic reticulum;GO:0004758 serine C-palmitoyltransferase activity;GO:0005515 protein binding;GO:0005783 endoplasmic reticulum;GO:0016049 cell growth;GO:0030148 sphingolipid biosynthetic process
Pp1s60_106V6	5758	835	-2.54506										173.727	30.4408	35.2599	43.1656	PF01507	PTHR18929	KOG0189	1.8.4.9	K05907	AT4G21990.1	2011-04-03	APS reductase 3		GO:0009507 chloroplast;GO:0000103 sulfate assimilation;GO:0009507 chloroplast;GO:0000103 sulfate assimilation;GO:0009973 adenylyl-sulfate reductase activity
Pp1s95_45V6	504	73	-2.5468						122	14	-3.04324		15.2064	2.66129	4.08519	0.415054	PF00578	PTHR10681				AT3G26060.1	ATPRX Q	Thioredoxin superfamily protein		GO:0016209 antioxidant activity;GO:0045454 cell redox homeostasis;GO:0045454 cell redox homeostasis;GO:0005515 protein binding;GO:0009941 chloroplast envelope;GO:0009507 chloroplast;GO:0009533 chloroplast stromal thylakoid;GO:0009535 chloroplast thylakoid membrane;GO:0010287 plastoglobule;GO:0010287 plastoglobule;GO:0009535 chloroplast thylakoid membrane;GO:0051920 peroxiredoxin activity;GO:00095…
Pp1s252_12V6	366	53	-2.54712										11.0427	1.93217	2.87973	1.60092						AT5G38380.1				GO:0003674 molecular_function;GO:0008150 biological_process;GO:0016020 membrane;GO:0016020 membrane
Pp1s78_99V6	304	44	-2.54784										9.17209	1.60407	4.42004	4.65454	PF00690,PF00122,PF00702,PF00689	PTHR11939	KOG0202	3.6.3.8	K01537	AT1G07810.1	ECA1	ER-type Ca2+-ATPase 1		GO:0005388 calcium-transporting ATPase activity;GO:0010042 response to manganese ion;GO:0005388 calcium-transporting ATPase activity;GO:0046686 response to cadmium ion;GO:0005783 endoplasmic reticulum;GO:0005774 vacuolar membrane;GO:0005886 plasma membrane;GO:0005388 calcium-transporting ATPase activity;GO:0005388 calcium-transporting ATPase activity;GO:0005388 calcium-transporting ATPase activit…
Pp1s7_252V6	470	68	-2.5484										14.1805	2.47901	0.97107	3.11291	PF12171,PF00096	PTHR13182	KOG2785			AT4G31420.1		Zinc finger protein 622		GO:0003700 sequence-specific DNA binding transcription factor activity;GO:0006355 "regulation of transcription, DNA-dependent"
Pp1s55_182V6	104	15	-2.55289										3.13782	0.546841	0.368337	0	PF00249					AT2G40260.1		Homeodomain-like superfamily protein		GO:0003677 DNA binding;GO:0003700 sequence-specific DNA binding transcription factor activity;GO:0006355 "regulation of transcription, DNA-dependent"
Pp1s197_162V6	215	31	-2.55334										6.48684	1.13014	1.77471	1.36375	PF00561	PTHR10992	KOG1454			AT1G80280.1		alpha/beta-Hydrolases superfamily protein		GO:0016787 hydrolase activity
Pp1s141_64V6	118	17	-2.55452										3.56022	0.619753	0.83713	0.741168	PF00454	PTHR15245:SF11	KOG2381			AT1G13640.1		Phosphatidylinositol 3- and 4-kinase family protein		GO:0004428 inositol or phosphatidylinositol kinase activity;GO:0005575 cellular_component;GO:0016773 "phosphotransferase activity, alcohol group as acceptor"
Pp1s31_245V6	153	22	-2.5573										4.61622	0.802033	0	1.54163	PF01753,PF00443	PTHR10420	KOG1865			AT4G31670.1	UBP18	ubiquitin-specific protease 18		GO:0004197 cysteine-type endopeptidase activity;GO:0004221 ubiquitin thiolesterase activity;GO:0006511 ubiquitin-dependent protein catabolic process;GO:0006511 ubiquitin-dependent protein catabolic process;GO:0012505 endomembrane system
Pp1s69_149V6	147	21	-2.5667										4.43519	0.765577	2.77927	0	PF02681					AT3G61770.1		Acid phosphatase/vanadium-dependent haloperoxidase-related protein		GO:0003674 molecular_function;GO:0008150 biological_process;GO:0009507 chloroplast
Pp1s219_73V6	764	109	-2.56859						31	129	2.13717		23.0509	3.97371	1.03804	3.82443	PF09032,PF04969,PF05002	PTHR13164	KOG3260		K04507	AT1G30070.1		SGS domain-containing protein		GO:0003674 molecular_function;GO:0008150 biological_process;GO:0005886 plasma membrane
Pp1s220_83V6	380	54	-2.57431						37	273	2.96344		11.4651	1.96863	1.23895	8.09356	PF02518,PF00183	PTHR11528	KOG0019		K04079	AT5G56000.1	Hsp81.4	HEAT SHOCK PROTEIN 81.4	Protein processing in endoplasmic reticulum;Plant-pathogen interaction	GO:0005524 ATP binding;GO:0005524 ATP binding;GO:0006457 protein folding;GO:0006457 protein folding;GO:0006950 response to stress;GO:0051082 unfolded protein binding;GO:0005618 cell wall;GO:0005774 vacuolar membrane;GO:0005886 plasma membrane;GO:0005634 nucleus;GO:0005829 cytosol;GO:0048046 apoplast
Pp1s77_228V6	507	72	-2.57526										15.2969	2.62483	0.267882	2.37174
Pp1s80_141V6	155	22	-2.57604										4.67656	0.802033	0	0.148234	PF00293	PTHR12629	KOG2839			AT3G12600.1	NUDT16	nudix hydrolase homolog 16		GO:0016787 hydrolase activity;GO:0016787 hydrolase activity;GO:0016787 hydrolase activity
Pp1s189_104V6	148	21	-2.57648										4.46536	0.765577	2.34396	0.889402	PF00170,PF07716,PF12498	PTHR22952				AT5G28770.1	BZO2H3	bZIP transcription factor family protein		GO:0003677 DNA binding;GO:0003700 sequence-specific DNA binding transcription factor activity;GO:0006355 "regulation of transcription, DNA-dependent";GO:0006355 "regulation of transcription, DNA-dependent";GO:0006355 "regulation of transcription, DNA-dependent";GO:0006355 "regulation of transcription, DNA-dependent";GO:0003700 sequence-specific DNA binding transcription factor activity;GO:0003700…
Pp1s104_210V6	973	138	-2.57712						174	822	2.32019		29.3567	5.03093	5.82642	24.3696	PF01965	PTHR11019	KOG2764			AT3G02720.1		Class I glutamine amidotransferase-like superfamily protein		GO:0005575 cellular_component;GO:0008150 biological_process;GO:0016798 "hydrolase activity, acting on glycosyl bonds"
Pp1s306_52V6	255	36	-2.58377										7.6937	1.31242	1.1385	0.415054	PF00249					AT2G01060.1		myb-like HTH transcriptional regulator family protein		GO:0003700 sequence-specific DNA binding transcription factor activity;GO:0003700 sequence-specific DNA binding transcription factor activity;GO:0006355 "regulation of transcription, DNA-dependent"
Pp1s14_73V6	163	23	-2.58451						34	176	2.45211		4.91793	0.838489	1.1385	5.21782	PF05773,PF00097,PF01485	PTHR11685	KOG1814	6.3.2.19	K11971	AT1G32340.1	NHL8	NDR1/HIN1-like 8		GO:0008150 biological_process;GO:0008270 zinc ion binding
Pp1s88_142V6	3709	521	-2.59102										111.906	18.9936	21.5979	19.0332	PF11976,PF00240,PF07708	PTHR10666	KOG0005		K04551	AT4G05320.2	UBQ10	polyubiquitin 10		GO:0006464 protein modification process;GO:0009751 response to salicylic acid stimulus;GO:0006464 protein modification process;GO:0007568 aging
Pp1s167_126V6	100	14	-2.59585						49	329	2.82737		3.01714	0.510385	1.64077	9.75377						AT1G22750.2				GO:0003674 molecular_function;GO:0008150 biological_process;GO:0005773 vacuole;GO:0005773 vacuole;GO:0005773 vacuole
Pp1s177_13V6	908	127	-2.59721										27.3956	4.62992	12.1886	3.29079	PF00504	PTHR21649			K08912	AT2G05100.1	LHCB2.1	photosystem II light harvesting complex gene 2.1	Photosynthesis - antenna proteins;Metabolic pathways	GO:0015979 photosynthesis;GO:0016168 chlorophyll binding;GO:0030076 light-harvesting complex;GO:0009941 chloroplast envelope;GO:0009535 chloroplast thylakoid membrane;GO:0009507 chloroplast;GO:0009535 chloroplast thylakoid membrane;GO:0009535 chloroplast thylakoid membrane;GO:0010287 plastoglobule;GO:0016020 membrane;GO:0009507 chloroplast;GO:0009579 thylakoid;GO:0009637 response to blue light;GO…
Pp1s34_106V6	143	20	-2.59729										4.31451	0.729121	0.937585	2.60891	PF11976	PTHR10562	KOG1769			AT1G68185.1		Ubiquitin-like superfamily protein		GO:0003674 molecular_function
Pp1s333_30V6	773	108	-2.59878										23.3225	3.93725	2.61184	5.98864	PF07250,PF09118					AT3G53950.1		glyoxal oxidase-related protein		GO:0003674 molecular_function;GO:0008150 biological_process
Pp1s42_185V6	115	16	-2.60483										3.46971	0.583297	1.87517	3.88372		PTHR13448	KOG4467			AT1G70770.1		Protein of unknown function DUF2359, transmembrane		GO:0003674 molecular_function;GO:0005886 plasma membrane;GO:0005783 endoplasmic reticulum;GO:0005774 vacuolar membrane;GO:0005886 plasma membrane;GO:0016020 membrane;GO:0005634 nucleus;GO:0005829 cytosol
Pp1s127_94V6	621	86	-2.61153						12	294	4.69485		18.7364	3.13522	0.401822	8.71614						AT1G18730.1	NDF6	NDH dependent flow 6		GO:0003674 molecular_function;GO:0009507 chloroplast;GO:0009535 chloroplast thylakoid membrane;GO:0009535 chloroplast thylakoid membrane;GO:0009773 photosynthetic electron transport in photosystem I;GO:0010598 NAD(P)H dehydrogenase complex (plastoquinone)
Pp1s71_157V6	116	16	-2.61733										3.49988	0.583297	0.301367	2.93503	PF00097	PTHR22764				AT3G05200.1	ATL6	RING/U-box superfamily protein		GO:0008270 zinc ion binding;GO:0008270 zinc ion binding;GO:0005886 plasma membrane;GO:0004842 ubiquitin-protein ligase activity;GO:0016567 protein ubiquitination;GO:0005886 plasma membrane;GO:0010200 response to chitin
Pp1s323_82V6	718	99	-2.61783										21.663	3.60915	7.86902	20.2487	PF03321					AT5G54510.1	DFL1	Auxin-responsive GH3 family protein	Plant hormone signal transduction	GO:0009733 response to auxin stimulus;GO:0005737 cytoplasm;GO:0009734 auxin mediated signaling pathway;GO:0009826 unidimensional cell growth;GO:0009507 chloroplast;GO:0009733 response to auxin stimulus;GO:0010252 auxin homeostasis;GO:0010279 indole-3-acetic acid amido synthetase activity
Pp1s97_20V6	146	20	-2.62724										4.40502	0.729121	0.602733	0.207527
Pp1s65_120V6	358	49	-2.62845										10.8013	1.78635	0.267882	0.681875	PF00111					AT1G60950.1	FED A	2Fe-2S ferredoxin-like superfamily protein	Photosynthesis	GO:0009055 electron carrier activity;GO:0051536 iron-sulfur cluster binding;GO:0051537 "2 iron, 2 sulfur cluster binding";GO:0005515 protein binding;GO:0009507 chloroplast;GO:0009767 photosynthetic electron transport chain;GO:0009416 response to light stimulus;GO:0009570 chloroplast stroma;GO:0009767 photosynthetic electron transport chain
Pp1s45_164V6	475	65	-2.62876										14.3314	2.36964	4.38656	0.948695	PF00333,PF03719	PTHR13718	KOG0877			AT2G33800.1		Ribosomal protein S5 family protein	Ribosome	GO:0003723 RNA binding;GO:0003735 structural constituent of ribosome;GO:0003735 structural constituent of ribosome;GO:0005622 intracellular;GO:0005840 ribosome;GO:0006412 translation;GO:0009579 thylakoid;GO:0005634 nucleus;GO:0009409 response to cold;GO:0009535 chloroplast thylakoid membrane;GO:0009507 chloroplast;GO:0009570 chloroplast stroma;GO:0046686 response to cadmium ion;GO:0016020 membran…
Pp1s137_86V6	117	16	-2.62971										3.53005	0.583297	1.74123	0.385407	PF00213	PTHR11910	KOG1662	3.6.3.14	K02113	AT4G09650.1	ATPD	ATP synthase delta-subunit gene	Oxidative phosphorylation;Photosynthesis;Metabolic pathways	GO:0046933 "hydrogen ion transporting ATP synthase activity, rotational mechanism";GO:0009579 thylakoid;GO:0009941 chloroplast envelope;GO:0009772 photosynthetic electron transport in photosystem II;GO:0009773 photosynthetic electron transport in photosystem I;GO:0015979 photosynthesis;GO:0009535 chloroplast thylakoid membrane;GO:0009579 thylakoid;GO:0009507 chloroplast;GO:0009535 chloroplast thy…
Pp1s19_25V6	2034	278	-2.63051						817	5748	2.89479		61.3686	10.1348	27.3574	170.409		PTHR21152	KOG2862	2.6.1.44,2.6.1.45,2.6.1.51	K00830	AT2G13360.1	AGT	alanine:glyoxylate aminotransferase	Alanine, aspartate and glutamate metabolism;Glycine, serine and threonine metabolism;Metabolic pathways;Biosynthesis of secondary metabolites;Peroxisome	GO:0004760 serine-pyruvate transaminase activity;GO:0005777 peroxisome;GO:0008453 alanine-glyoxylate transaminase activity;GO:0009853 photorespiration;GO:0050281 serine-glyoxylate transaminase activity;GO:0005886 plasma membrane;GO:0005886 plasma membrane;GO:0009507 chloroplast;GO:0009507 chloroplast;GO:0016020 membrane;GO:0016020 membrane;GO:0005777 peroxisome;GO:0005777 peroxisome;GO:0005777 pe…
Pp1s28_82V6	111	15	-2.64687										3.34902	0.546841	0.468793	1.51198	PF00140,PF04542,PF04539,PF04545					AT1G08540.1	SIG2	RNApolymerase sigma subunit 2		GO:0003677 DNA binding;GO:0003700 sequence-specific DNA binding transcription factor activity;GO:0003899 DNA-directed RNA polymerase activity;GO:0006355 "regulation of transcription, DNA-dependent";GO:0009507 chloroplast;GO:0009637 response to blue light;GO:0010114 response to red light;GO:0006352 "transcription initiation, DNA-dependent";GO:0016987 sigma factor activity
Pp1s160_88V6	104	14	-2.65243										3.13782	0.510385	1.10501	0.474348	PF02364					AT3G07160.1	GSL10	glucan synthase-like 10		GO:0000148 "1,3-beta-D-glucan synthase complex";GO:0003843 "1,3-beta-D-glucan synthase activity";GO:0003843 "1,3-beta-D-glucan synthase activity";GO:0006075 "1,3-beta-D-glucan biosynthetic process";GO:0005886 plasma membrane;GO:0005886 plasma membrane;GO:0005886 plasma membrane;GO:0009555 pollen development;GO:0009556 microsporogenesis;GO:0048589 developmental growth;GO:0052543 callose deposition…
Pp1s291_35V6	925	123	-2.67014						333	67	-2.23315		27.9085	4.48409	11.1506	1.98633	PF00464	PTHR11680	KOG2467	2.1.2.1	K00600	AT4G13930.1	SHM4	serine hydroxymethyltransferase 4	Glycine, serine and threonine metabolism;Cyanoamino acid metabolism;One carbon pool by folate;Metabolic pathways;Biosynthesis of secondary metabolites	GO:0003824 catalytic activity;GO:0004372 glycine hydroxymethyltransferase activity;GO:0004372 glycine hydroxymethyltransferase activity;GO:0006544 glycine metabolic process;GO:0006563 L-serine metabolic process;GO:0030170 pyridoxal phosphate binding;GO:0005829 cytosol;GO:0046686 response to cadmium ion;GO:0016020 membrane;GO:0005886 plasma membrane;GO:0005829 cytosol
Pp1s47_57V6	414	55	-2.67147										12.4909	2.00508	0.97107	2.13456	PF00646,PF01344,PF07646	PTHR23230				AT4G03030.1		Galactose oxidase/kelch repeat superfamily protein		GO:0003674 molecular_function;GO:0008150 biological_process
Pp1s494_4V6	128	17	-2.67188										3.86193	0.619753	1.27244	3.11291
Pp1s89_94V6	521	69	-2.67596										15.7193	2.51547	2.4779	7.05592	PF04640					AT1G76590.1		PLATZ transcription factor family protein		GO:0005488 binding;GO:0008150 biological_process
Pp1s376_31V6	251	33	-2.68649										7.57301	1.20305	2.61184	7.02627						AT2G34640.1	PTAC12	plastid transcriptionally active 12		GO:0003674 molecular_function;GO:0009507 chloroplast;GO:0009295 nucleoid;GO:0009508 plastid chromosome;GO:0042793 transcription from plastid promoter;GO:0045893 "positive regulation of transcription, DNA-dependent";GO:0009507 chloroplast
Pp1s11_289V6	711	93	-2.69389						10	401	5.40567		21.4518	3.39041	0.334852	11.8883	PF00011	PTHR11527	KOG3591			AT5G12030.1	HSP17.6A	heat shock protein 17.6A		GO:0005829 cytosol;GO:0006457 protein folding;GO:0006972 hyperosmotic response;GO:0051082 unfolded protein binding;GO:0009408 response to heat;GO:0009644 response to high light intensity;GO:0042542 response to hydrogen peroxide
Pp1s392_2V6	436	57	-2.69464										13.1547	2.07799	1.5738	4.5063	PF02701					AT5G39660.1	CDF2	cycling DOF factor 2		GO:0003677 DNA binding;GO:0003700 sequence-specific DNA binding transcription factor activity;GO:0006355 "regulation of transcription, DNA-dependent";GO:0003700 sequence-specific DNA binding transcription factor activity;GO:0005515 protein binding;GO:0005515 protein binding;GO:0005515 protein binding;GO:0005515 protein binding;GO:0048510 regulation of timing of transition from vegetative to repro…
Pp1s99_220V6	123	16	-2.70186										3.71108	0.583297	0	1.80845	PF03094					AT4G02600.1	MLO1	Seven transmembrane MLO family protein		GO:0005516 calmodulin binding;GO:0005886 plasma membrane;GO:0006952 defense response;GO:0008219 cell death;GO:0008219 cell death;GO:0008219 cell death;GO:0005886 plasma membrane;GO:0005886 plasma membrane;GO:0005886 plasma membrane
Pp1s36_150V6	100	13	-2.70276										3.01714	0.473928	0	0	PF07250,PF09118					AT3G53950.1		glyoxal oxidase-related protein		GO:0003674 molecular_function;GO:0008150 biological_process
Pp1s72_62V6	200	26	-2.70276						34	369	3.52015		6.03427	0.947857	1.1385	10.9396	PF00650	PTHR10174				AT1G01630.1		Sec14p-like phosphatidylinositol transfer family protein		GO:0005215 transporter activity;GO:0005575 cellular_component;GO:0006810 transport
Pp1s72_143V6	209	27	-2.71182										6.30582	0.984313	0.267882	1.92704	PF00249	PTHR10641	KOG0048		K09422	AT3G55730.1	MYB109	myb domain protein 109		GO:0003677 DNA binding;GO:0003700 sequence-specific DNA binding transcription factor activity;GO:0003700 sequence-specific DNA binding transcription factor activity;GO:0006355 "regulation of transcription, DNA-dependent";GO:0005634 nucleus;GO:0005737 cytoplasm;GO:0009651 response to salt stress;GO:0009723 response to ethylene stimulus;GO:0009733 response to auxin stimulus;GO:0009737 response to a…
Pp1s31_388V6	327	42	-2.72017										9.86604	1.53115	1.67426	2.31244	PF00447	PTHR10015				AT4G17750.1	HSF1	heat shock factor 1		GO:0003677 DNA binding;GO:0003700 sequence-specific DNA binding transcription factor activity;GO:0003700 sequence-specific DNA binding transcription factor activity;GO:0005515 protein binding;GO:0005515 protein binding;GO:0005634 nucleus;GO:0009408 response to heat;GO:0003677 DNA binding;GO:0009408 response to heat;GO:0005515 protein binding;GO:0005515 protein binding
Pp1s197_153V6	164	21	-2.72458										4.9481	0.765577	1.37289	0.385407	PF03514					AT3G13840.1		GRAS family transcription factor		GO:0003700 sequence-specific DNA binding transcription factor activity;GO:0005575 cellular_component;GO:0003700 sequence-specific DNA binding transcription factor activity;GO:0006355 "regulation of transcription, DNA-dependent"
Pp1s441_24V6	125	16	-2.72513										3.77142	0.583297	1.07153	0.17788	PF00400	PTHR23284	KOG0771			AT3G52190.1	PHF1	phosphate transporter traffic facilitator1		GO:0000166 nucleotide binding;GO:0005783 endoplasmic reticulum;GO:0006817 phosphate transport;GO:0006888 ER to Golgi vesicle-mediated transport;GO:0005783 endoplasmic reticulum;GO:0016036 cellular response to phosphate starvation;GO:0005886 plasma membrane
Pp1s15_182V6	118	15	-2.7351										3.56022	0.546841	0.602733	0.148234	PF06026	PTHR11934	KOG3075	5.3.1.6	K01807	AT5G44520.1		NagB/RpiA/CoA transferase-like superfamily protein	Pentose phosphate pathway;Carbon fixation in photosynthetic organisms;Metabolic pathways;Biosynthesis of secondary metabolites	GO:0004751 ribose-5-phosphate isomerase activity;GO:0009052 "pentose-phosphate shunt, non-oxidative branch";GO:0009507 chloroplast
Pp1s352_50V6	1661	211	-2.73608						160	1316	3.12015		50.1146	7.69222	5.35763	39.0151	PF00664,PF00005	PTHR19242	KOG0054			AT2G34660.1	MRP2	multidrug resistance-associated protein 2		GO:0042626 "ATPase activity, coupled to transmembrane movement of substances";GO:0005773 vacuole;GO:0000325 plant-type vacuole;GO:0005774 vacuolar membrane;GO:0005774 vacuolar membrane;GO:0042626 "ATPase activity, coupled to transmembrane movement of substances"
Pp1s427_40V6	221	28	-2.73989						26	461	4.22832		6.66787	1.02077	0.870615	13.6671	PF00169,PF01237	PTHR10972	KOG1737			AT4G08180.1	ORP1C	OSBP(oxysterol binding protein)-related protein 1C		GO:0008142 oxysterol binding;GO:0008202 steroid metabolic process;GO:0007165 signal transduction;GO:0035091 phosphatidylinositol binding
Pp1s77_230V6	206	26	-2.74541										6.2153	0.947857	2.67882	0.326114
Pp1s37_355V6	128	16	-2.75934										3.86193	0.583297	0.736674	0.17788	PF00759,PF09478	PTHR22298				AT1G64390.1	GH9C2	glycosyl hydrolase 9C2		GO:0003824 catalytic activity;GO:0004553 "hydrolase activity, hydrolyzing O-glycosyl compounds";GO:0004553 "hydrolase activity, hydrolyzing O-glycosyl compounds";GO:0005576 extracellular region;GO:0005975 carbohydrate metabolic process;GO:0012505 endomembrane system;GO:0030246 carbohydrate binding
Pp1s96_99V6	144	18	-2.75934										4.34468	0.656209	0.0669704	0.889402	PF08700	PTHR15954	KOG2346			AT4G02030.1		Vps51/Vps67 family (components of vesicular transport) protein		GO:0003674 molecular_function;GO:0008150 biological_process;GO:0005829 cytosol
Pp1s175_19V6	1033	129	-2.76074										31.167	4.70283	3.71686	7.02627	PF01095					AT5G19730.1		Pectin lyase-like superfamily protein	Pentose and glucuronate interconversions;Starch and sucrose metabolism;Metabolic pathways	GO:0009505 plant-type cell wall;GO:0030599 pectinesterase activity;GO:0030599 pectinesterase activity;GO:0042545 cell wall modification;GO:0005618 cell wall;GO:0005737 cytoplasm
Pp1s317_19V6	481	60	-2.76235						16	321	4.40657		14.5124	2.18736	0.535763	9.5166	PF01641	PTHR10173	KOG0856			AT1G53670.1	MSRB1	methionine sulfoxide reductase B 1		GO:0008113 peptide-methionine-(S)-S-oxide reductase activity;GO:0008113 peptide-methionine-(S)-S-oxide reductase activity;GO:0006979 response to oxidative stress;GO:0006979 response to oxidative stress;GO:0009507 chloroplast;GO:0033743 peptide-methionine (R)-S-oxide reductase activity;GO:0009507 chloroplast;GO:0009507 chloroplast;GO:0009507 chloroplast;GO:0009570 chloroplast stroma
Pp1s291_62V6	642	80	-2.76385						0	455	37.8222		19.37	2.91648	0	13.4893	PF02518,PF00183	PTHR11528	KOG0019		K04079	AT5G52640.1	HSP90.1	heat shock protein 90.1	Protein processing in endoplasmic reticulum;Plant-pathogen interaction	GO:0005524 ATP binding;GO:0009408 response to heat;GO:0046685 response to arsenic-containing substance;GO:0051082 unfolded protein binding;GO:0005515 protein binding;GO:0009816 "defense response to bacterium, incompatible interaction";GO:0042742 defense response to bacterium;GO:0005618 cell wall;GO:0005515 protein binding;GO:0005886 plasma membrane;GO:0005829 cytosol;GO:0005515 protein binding;GO…
Pp1s27_129V6	866	107	-2.7761										26.1284	3.9008	1.1385	1.86774
Pp1s28_387V6	164	20	-2.79497										4.9481	0.729121	0.9041	0.444701	PF07992,PF00070	PTHR22915	KOG2495	1.6.99.3	K03885	AT1G07180.1	NDA1	alternative NAD(P)H dehydrogenase 1		GO:0003954 NADH dehydrogenase activity;GO:0055114 oxidation-reduction process;GO:0003954 NADH dehydrogenase activity;GO:0005739 mitochondrion;GO:0031304 intrinsic to mitochondrial inner membrane
Pp1s90_29V6	215	26	-2.8071										6.48684	0.947857	1.37289	0.474348	PF00010					AT5G08130.1	BIM1	basic helix-loop-helix (bHLH) DNA-binding superfamily protein		GO:0003677 DNA binding;GO:0005634 nucleus;GO:0005634 nucleus;GO:0005634 nucleus;GO:0005634 nucleus;GO:0005634 nucleus;GO:0005634 nucleus;GO:0003700 sequence-specific DNA binding transcription factor activity;GO:0006355 "regulation of transcription, DNA-dependent";GO:0003700 sequence-specific DNA binding transcription factor activity;GO:0003700 sequence-specific DNA binding transcription factor ac…
Pp1s159_108V6	737	89	-2.80913						198	1877	3.32499		22.2363	3.24459	6.63007	55.6469	PF00226	PTHR11821	KOG0723			AT1G80920.1	J8	Chaperone DnaJ-domain superfamily protein		GO:0006457 protein folding;GO:0031072 heat shock protein binding;GO:0051082 unfolded protein binding;GO:0005634 nucleus;GO:0006950 response to stress;GO:0009570 chloroplast stroma
Pp1s145_100V6	108	13	-2.81379										3.25851	0.473928	2.31048	0.859755
Pp1s357_19V6	125	15	-2.81824										3.77142	0.546841	0	0.296467						AT1G15780.1
Pp1s50_6V6	175	21	-2.81824										5.27999	0.765577	1.90866	0.266821						AT1G80940.1				GO:0003674 molecular_function;GO:0005575 cellular_component;GO:0008150 biological_process
Pp1s28_112V6	617	74	-2.81902						57	240	2.15414		18.6157	2.69775	1.90866	7.11521	PF00025	PTHR11711	KOG0070			AT3G62290.2	ARFA1E	ADP-ribosylation factor A1E		GO:0005773 vacuole;GO:0005525 GTP binding;GO:0005525 GTP binding;GO:0016004 phospholipase activator activity;GO:0005515 protein binding;GO:0005829 cytosol
Pp1s11_225V6	647	77	-2.83018										19.5209	2.80711	6.16127	8.89402	PF00886	PTHR12919	KOG3419			AT5G56940.1		Ribosomal protein S16 family protein		GO:0003735 structural constituent of ribosome;GO:0003735 structural constituent of ribosome;GO:0005840 ribosome;GO:0006412 translation;GO:0006412 translation;GO:0042254 ribosome biogenesis;GO:0005739 mitochondrion;GO:0009536 plastid
Pp1s98_14V6	698	83	-2.83139										21.0596	3.02585	0.435307	1.21552	PF03514					AT1G07530.1	SCL14	SCARECROW-like 14		GO:0003700 sequence-specific DNA binding transcription factor activity;GO:0006355 "regulation of transcription, DNA-dependent";GO:0005634 nucleus;GO:0005829 cytosol;GO:0009410 response to xenobiotic stimulus;GO:0045893 "positive regulation of transcription, DNA-dependent"
Pp1s334_66V6	118	14	-2.83463										3.56022	0.510385	2.67882	0.444701	PF05687					AT1G78700.1	BEH4	BES1/BZR1 homolog 4		GO:0005575 cellular_component;GO:0008150 biological_process;GO:0006355 "regulation of transcription, DNA-dependent"
Pp1s42_16V6	695	82	-2.84266										20.9691	2.98939	4.55399	4.74348						AT3G02420.1				GO:0003674 molecular_function;GO:0008150 biological_process;GO:0016020 membrane
Pp1s190_33V6	298	35	-2.84923										8.99107	1.27596	0.133941	0.0889402	PF02178,PF03479					AT2G33620.2		AT hook motif DNA-binding family protein		GO:0003677 DNA binding;GO:0003677 DNA binding;GO:0003677 DNA binding;GO:0003677 DNA binding;GO:0003677 DNA binding;GO:0005829 cytosol
Pp1s21_138V6	812	95	-2.85482						24	381	4.06882		24.4991	3.46332	0.803645	11.2954	PF00089,PF00595	PTHR22939	KOG1320			AT3G27925.1	DEGP1	DegP protease 1		GO:0006508 proteolysis;GO:0008236 serine-type peptidase activity;GO:0009543 chloroplast thylakoid lumen;GO:0031977 thylakoid lumen;GO:0009543 chloroplast thylakoid lumen;GO:0009579 thylakoid;GO:0004252 serine-type endopeptidase activity;GO:0030163 protein catabolic process;GO:0005634 nucleus;GO:0009507 chloroplast;GO:0009579 thylakoid;GO:0008236 serine-type peptidase activity;GO:0010206 photosyst…
Pp1s271_68V6	909	106	-2.85956										27.4258	3.86434	0.9041	0.296467						AT5G21940.1				GO:0003674 molecular_function;GO:0008150 biological_process;GO:0005515 protein binding
Pp1s35_94V6	382	44	-2.87734						45	1513	5.15148		11.5255	1.60407	1.50683	44.8555	PF07992,PF00070,PF02852	PTHR22912	KOG1335	1.8.1.4	K00382	AT3G16950.2	LPD1	lipoamide dehydrogenase 1	Glycolysis / Gluconeogenesis;Citrate cycle (TCA cycle);Glycine, serine and threonine metabolism;Valine, leucine and isoleucine degradation;Pyruvate metabolism;Metabolic pathways;Biosynthesis of secondary metabolites	GO:0004148 dihydrolipoyl dehydrogenase activity;GO:0006086 acetyl-CoA biosynthetic process from pyruvate;GO:0009570 chloroplast stroma;GO:0009570 chloroplast stroma;GO:0009941 chloroplast envelope;GO:0009507 chloroplast;GO:0005730 nucleolus;GO:0005829 cytosol;GO:0005829 cytosol
Pp1s4_323V6	235	27	-2.88097										7.09027	0.984313	0.100456	1.27481	PF10539	PTHR23230				AT3G27090.1		DCD (Development and Cell Death) domain protein		GO:0003674 molecular_function;GO:0008150 biological_process
Pp1s1_405V6	5713	656	-2.88183						593	7827	3.80249		172.369	23.9152	19.8567	232.045	PF00724	PTHR22893	KOG0134	1.3.1.42	K05894	AT1G76680.1	OPR1	12-oxophytodienoate reductase 1	alpha-Linolenic acid metabolism;Metabolic pathways	GO:0010150 leaf senescence;GO:0009611 response to wounding;GO:0009695 jasmonic acid biosynthetic process;GO:0006629 lipid metabolic process;GO:0009751 response to salicylic acid stimulus;GO:0046686 response to cadmium ion;GO:0046686 response to cadmium ion;GO:0016629 12-oxophytodienoate reductase activity;GO:0005829 cytosol;GO:0005829 cytosol;GO:0016629 12-oxophytodienoate reductase activity;GO:0…
Pp1s51_62V6	140	16	-2.88863										4.22399	0.583297	0	0.385407	PF03810,PF08389,PF02985,PF08767	PTHR11223	KOG2020		K14290	AT5G17020.1	XPO1A	exportin 1A	Ribosome biogenesis in eukaryotes;RNA transport	GO:0000059 "protein import into nucleus, docking";GO:0005634 nucleus;GO:0005643 nuclear pore;GO:0005737 cytoplasm;GO:0008565 protein transporter activity;GO:0004872 receptor activity;GO:0005515 protein binding;GO:0005634 nucleus;GO:0006611 protein export from nucleus;GO:0009553 embryo sac development;GO:0009555 pollen development;GO:0009846 pollen germination;GO:0009860 pollen tube growth;GO:0005…
Pp1s47_120V6	536	61	-2.8947										16.1719	2.22382	0.636219	0.385407
Pp1s62_171V6	423	48	-2.8989										12.7625	1.74989	0	0.859755	PF00122,PF00702	PTHR11939	KOG0210			AT3G27870.1		ATPase E1-E2 type family protein / haloacid dehalogenase-like hydrolase family protein		GO:0006754 ATP biosynthetic process;GO:0008152 metabolic process;GO:0015662 "ATPase activity, coupled to transmembrane movement of ions, phosphorylative mechanism";GO:0015914 phospholipid transport;GO:0016020 membrane;GO:0016021 integral to membrane
Pp1s155_21V6	275	31	-2.90844						36	416	3.61065		8.29713	1.13014	1.20547	12.333	PF00847				K09286	AT5G21960.1		Integrase-type DNA-binding superfamily protein		GO:0003677 DNA binding;GO:0003677 DNA binding;GO:0003700 sequence-specific DNA binding transcription factor activity;GO:0003700 sequence-specific DNA binding transcription factor activity;GO:0005634 nucleus;GO:0006355 "regulation of transcription, DNA-dependent";GO:0006355 "regulation of transcription, DNA-dependent";GO:0005634 nucleus
Pp1s38_187V6	222	25	-2.9099										6.69804	0.911401	0	0.266821						AT3G13227.1		serine-rich protein-related		GO:0003674 molecular_function;GO:0005575 cellular_component;GO:0008150 biological_process
Pp1s68_88V6	231	26	-2.91065										6.96959	0.947857	0.770159	0.355761	PF07723	PTHR23125	KOG1947			AT1G47056.1	VFB1	VIER F-box proteine 1		GO:0004842 ubiquitin-protein ligase activity
Pp1s3_177V6	249	28	-2.91199						20	293	3.95297		7.51267	1.02077	0.669704	8.68649			KOG2878			AT1G80380.3		P-loop containing nucleoside triphosphate hydrolases superfamily protein		GO:0009941 chloroplast envelope;GO:0009941 chloroplast envelope;GO:0008887 glycerate kinase activity;GO:0009507 chloroplast;GO:0009853 photorespiration;GO:0009507 chloroplast;GO:0009507 chloroplast;GO:0009507 chloroplast;GO:0009570 chloroplast stroma
Pp1s5_405V6	178	20	-2.91315						5	209	5.46557		5.3705	0.729121	0.167426	6.19617	PF00443	PTHR10420	KOG1871	3.1.2.15	K11842	AT4G39910.1	UBP3	ubiquitin-specific protease 3		GO:0004843 ubiquitin-specific protease activity;GO:0004843 ubiquitin-specific protease activity;GO:0005634 nucleus
Pp1s34_54V6	276	31	-2.91367										8.3273	1.13014	0.803645	0.326114	PF00686,PF01326	PTHR22931				AT5G26570.1	ATGWD3	catalytics;carbohydrate kinases;phosphoglucan, water dikinases		GO:0003824 catalytic activity;GO:0005975 carbohydrate metabolic process;GO:0009507 chloroplast;GO:0005983 starch catabolic process;GO:0009536 plastid;GO:0051752 "phosphoglucan, water dikinase activity";GO:0005982 starch metabolic process;GO:0009507 chloroplast;GO:0019200 carbohydrate kinase activity;GO:0046777 protein autophosphorylation;GO:0051752 "phosphoglucan, water dikinase activity";GO:0009…
Pp1s28_119V6	144	16	-2.92927										4.34468	0.583297	0.703189	2.2828
Pp1s5_369V6	117	13	-2.92927										3.53005	0.473928	1.60729	0.711521	PF01208	PTHR21091	KOG2872			AT2G40490.1	HEME2	Uroporphyrinogen decarboxylase	Porphyrin and chlorophyll metabolism;Metabolic pathways;Biosynthesis of secondary metabolites	GO:0004853 uroporphyrinogen decarboxylase activity;GO:0004853 uroporphyrinogen decarboxylase activity;GO:0006779 porphyrin biosynthetic process;GO:0009941 chloroplast envelope;GO:0009570 chloroplast stroma;GO:0009507 chloroplast;GO:0009570 chloroplast stroma
Pp1s9_381V6	987	109	-2.93807						106	586	2.54697		29.7791	3.97371	3.54943	17.373	PF08325		KOG4842			AT5G35690.1				GO:0005575 cellular_component
Pp1s135_121V6	118	13	-2.94155						32	145	2.26005		3.56022	0.473928	1.07153	4.29877		PTHR23258	KOG1187			AT5G45840.2		Leucine-rich repeat protein kinase family protein		GO:0004672 protein kinase activity;GO:0004672 protein kinase activity;GO:0004674 protein serine/threonine kinase activity;GO:0004674 protein serine/threonine kinase activity;GO:0004674 protein serine/threonine kinase activity;GO:0005524 ATP binding;GO:0005524 ATP binding;GO:0005524 ATP binding;GO:0006468 protein phosphorylation;GO:0006468 protein phosphorylation;GO:0006468 protein phosphorylation…
Pp1s167_21V6	200	22	-2.94377						45	297	2.8026		6.03427	0.802033	1.50683	8.80508	PF02678,PF07883	PTHR13903				AT2G43120.1		RmlC-like cupins superfamily protein		GO:0008150 biological_process;GO:0005516 calmodulin binding;GO:0005886 plasma membrane
Pp1s277_34V6	200	22	-2.94377										6.03427	0.802033	1.97563	3.29079	PF00141			1.11.1.11	K00434	AT4G32320.1	APX6	ascorbate peroxidase 6	Ascorbate and aldarate metabolism;Glutathione metabolism	GO:0004601 peroxidase activity;GO:0006979 response to oxidative stress;GO:0016688 L-ascorbate peroxidase activity;GO:0020037 heme binding;GO:0055114 oxidation-reduction process;GO:0005829 cytosol
Pp1s240_28V6	310	34	-2.94801										9.35312	1.23951	1.87517	3.02397	PF01680		KOG1606	4.-.-.-	K06215	AT5G01410.1	RSR4	Aldolase-type TIM barrel family protein	Vitamin B6 metabolism	GO:0010224 response to UV-B;GO:0005829 cytosol;GO:0042819 vitamin B6 biosynthetic process;GO:0005886 plasma membrane;GO:0006950 response to stress;GO:0006979 response to oxidative stress;GO:0006982 response to lipid hydroperoxide;GO:0008615 pyridoxine biosynthetic process;GO:0012505 endomembrane system;GO:0042538 hyperosmotic salinity response;GO:0005515 protein binding;GO:0006520 cellular amino …
Pp1s82_101V6	128	14	-2.95199										3.86193	0.510385	1.10501	0.0889402	PF10604
Pp1s253_27V6	1226	134	-2.953										36.9901	4.88511	2.91321	1.45269	PF00686,PF02446			2.4.1.25	K00705	AT2G40840.1	DPE2	disproportionating enzyme 2	Starch and sucrose metabolism;Metabolic pathways	GO:0004134 4-alpha-glucanotransferase activity;GO:0000023 maltose metabolic process;GO:0005829 cytosol;GO:0005983 starch catabolic process;GO:0005976 polysaccharide metabolic process;GO:0004134 4-alpha-glucanotransferase activity;GO:0010297 heteropolysaccharide binding;GO:0000025 maltose catabolic process;GO:0004134 4-alpha-glucanotransferase activity;GO:0004134 4-alpha-glucanotransferase activit…
Pp1s85_11V6	658	71	-2.97154						25	109	2.20447		19.8528	2.58838	0.83713	3.23149	PF00011	PTHR11527	KOG0710			AT1G53540.1		HSP20-like chaperones superfamily protein	Protein processing in endoplasmic reticulum	GO:0009408 response to heat
Pp1s236_21V6	410	44	-2.97939										12.3703	1.60407	1.20547	0.355761	PF00643,PF06203					AT3G07650.3	COL9	CONSTANS-like 9		GO:0008270 zinc ion binding;GO:0003700 sequence-specific DNA binding transcription factor activity;GO:0005634 nucleus;GO:0006355 "regulation of transcription, DNA-dependent";GO:0048579 "negative regulation of long-day photoperiodism, flowering";GO:0007623 circadian rhythm
Pp1s333_42V6	150	16	-2.98816										4.5257	0.583297	0.368337	0.355761	PF02358	PTHR10788				AT5G51460.2	ATTPPA	Haloacid dehalogenase-like hydrolase (HAD) superfamily protein		GO:0004805 trehalose-phosphatase activity;GO:0005992 trehalose biosynthetic process;GO:0004805 trehalose-phosphatase activity;GO:0005992 trehalose biosynthetic process
Pp1s68_116V6	1205	127	-3.00548						191	1056	2.5471		36.3565	4.62992	6.39567	31.3069	PF00282	PTHR11999	KOG1383	4.1.1.15	K01580	AT2G02010.1	GAD4	glutamate decarboxylase 4	Alanine, aspartate and glutamate metabolism;beta-Alanine metabolism;Taurine and hypotaurine metabolism;Butanoate metabolism;Metabolic pathways;Biosynthesis of secondary metabolites	GO:0006536 glutamate metabolic process;GO:0019752 carboxylic acid metabolic process;GO:0005516 calmodulin binding;GO:0005634 nucleus;GO:0005829 cytosol
Pp1s54_72V6	1358	143	-3.00674						142	25	-2.42575		40.9727	5.21321	4.7549	0.741168	PF03765,PF00650	PTHR10174	KOG1470			AT1G22180.2		Sec14p-like phosphatidylinositol transfer family protein		GO:0003674 molecular_function;GO:0005575 cellular_component;GO:0008150 biological_process
Pp1s215_60V6	471	49	-3.02422						4	292	6.26996		14.2107	1.78635	0.133941	8.65684	PF07649,PF01422	PTHR12360	KOG1952			AT1G10170.1	NFXL1	NF-X-like 1		GO:0003700 sequence-specific DNA binding transcription factor activity;GO:0003700 sequence-specific DNA binding transcription factor activity;GO:0005634 nucleus;GO:0006355 "regulation of transcription, DNA-dependent";GO:0008270 zinc ion binding;GO:0005634 nucleus;GO:0009642 response to light intensity;GO:0009651 response to salt stress;GO:0010310 regulation of hydrogen peroxide metabolic process;…
Pp1s4_266V6	155	16	-3.03547										4.67656	0.583297	0.569248	0
Pp1s198_133V6	320	33	-3.03688										9.65484	1.20305	1.54032	0.0889402	PF00069,PF07714	PTHR23258	KOG1187			AT1G49730.1		Protein kinase superfamily protein		GO:0006468 protein phosphorylation;GO:0006468 protein phosphorylation;GO:0006468 protein phosphorylation;GO:0006468 protein phosphorylation;GO:0016301 kinase activity;GO:0005886 plasma membrane;GO:0005886 plasma membrane;GO:0005886 plasma membrane;GO:0005886 plasma membrane
Pp1s140_93V6	117	12	-3.04475										3.53005	0.437472	0	0.652228	PF02365					AT4G27410.2	RD26	NAC (No Apical Meristem) domain transcriptional regulator superfamily protein		GO:0007275 multicellular organismal development;GO:0003700 sequence-specific DNA binding transcription factor activity;GO:0003700 sequence-specific DNA binding transcription factor activity;GO:0009414 response to water deprivation;GO:0005634 nucleus;GO:0009414 response to water deprivation;GO:0009737 response to abscisic acid stimulus;GO:0045893 "positive regulation of transcription, DNA-dependen…
Pp1s324_44V6	663	68	-3.04475										20.0036	2.47901	4.01822	2.81644						AT1G31940.1				GO:0005886 plasma membrane
Pp1s65_42V6	244	25	-3.04623						32	128	2.08014		7.36181	0.911401	1.07153	3.79478	PF00046,PF02183	PTHR19418	KOG0483			AT3G01470.1	HB-1	homeobox 1		GO:0003677 DNA binding;GO:0005634 nucleus;GO:0005634 nucleus;GO:0006355 "regulation of transcription, DNA-dependent";GO:0003700 sequence-specific DNA binding transcription factor activity;GO:0043565 sequence-specific DNA binding;GO:0009637 response to blue light;GO:0009651 response to salt stress;GO:0045893 "positive regulation of transcription, DNA-dependent";GO:0045893 "positive regulation of t…
Pp1s9_366V6	176	18	-3.04885										5.31016	0.656209	1.03804	0.533641		PTHR12317				AT1G54570.1		Esterase/lipase/thioesterase family protein		GO:0003824 catalytic activity;GO:0016747 "transferase activity, transferring acyl groups other than amino-acyl groups";GO:0010287 plastoglobule;GO:0010287 plastoglobule;GO:0010287 plastoglobule;GO:0009507 chloroplast
Pp1s42_184V6	169	17	-3.07276						33	148	2.2452		5.09896	0.619753	1.10501	4.38772	PF02577					AT1G19660.1		Wound-responsive family protein		GO:0003677 DNA binding;GO:0003677 DNA binding;GO:0004518 nuclease activity;GO:0004518 nuclease activity;GO:0006289 nucleotide-excision repair;GO:0006289 nucleotide-excision repair;GO:0009611 response to wounding
Pp1s100_119V6	229	23	-3.07499										6.90924	0.838489	0.870615	0.355761						AT2G03440.1	NRP1	nodulin-related protein 1		GO:0003674 molecular_function;GO:0005575 cellular_component;GO:0009617 response to bacterium;GO:0009408 response to heat;GO:0009408 response to heat;GO:0009409 response to cold;GO:0009738 abscisic acid mediated signaling pathway
Pp1s241_77V6	130	13	-3.08127										3.92228	0.473928	2.4779	0.830108
Pp1s20_24V6	232	23	-3.09376										6.99976	0.838489	2.4779	1.06728	PF04116					AT4G25700.1	BETA-OHASE 1	beta-hydroxylase 1	Carotenoid biosynthesis;Metabolic pathways;Biosynthesis of secondary metabolites	GO:0005783 endoplasmic reticulum;GO:0005783 endoplasmic reticulum;GO:0009507 chloroplast;GO:0009507 chloroplast;GO:0010291 carotene beta-ring hydroxylase activity;GO:0016123 xanthophyll biosynthetic process;GO:0010291 carotene beta-ring hydroxylase activity;GO:0016119 carotene metabolic process
Pp1s353_11V6	343	34	-3.09395						4	204	5.75256		10.3488	1.23951	0.133941	6.04793
Pp1s194_4V6	659	65	-3.10111										19.8829	2.36964	2.54487	5.27712	PF00646					AT2G32560.1		F-box family protein		GO:0003674 molecular_function;GO:0008150 biological_process;GO:0012505 endomembrane system
Pp1s34_274V6	112	11	-3.10727										3.37919	0.401016	0.100456	0.592934	PF01063	PTHR11825	KOG0975			AT5G65780.1	ATBCAT-5	branched-chain amino acid aminotransferase 5 / branched-chain amino acid transaminase 5 (BCAT5)	Valine, leucine and isoleucine degradation;Valine, leucine and isoleucine biosynthesis;Pantothenate and CoA biosynthesis;Glucosinolate biosynthesis;Metabolic pathways;Biosynthesis of secondary metabolites	GO:0003824 catalytic activity;GO:0008152 metabolic process;GO:0009081 branched chain family amino acid metabolic process;GO:0004084 branched-chain-amino-acid transaminase activity;GO:0009507 chloroplast;GO:0005739 mitochondrion;GO:0009507 chloroplast
Pp1s6_146V6	153	15	-3.10984										4.61622	0.546841	0.435307	0	PF00012	PTHR19375	KOG0102		K03283	AT5G49910.1	CPHSC70-2EAT SHOCK PROTEIN 70-2	chloroplast heat shock protein 70-2	Spliceosome;Protein processing in endoplasmic reticulum;Endocytosis	GO:0006457 protein folding;GO:0009408 response to heat;GO:0009532 plastid stroma;GO:0009941 chloroplast envelope;GO:0009507 chloroplast;GO:0009570 chloroplast stroma;GO:0046686 response to cadmium ion;GO:0009579 thylakoid;GO:0009532 plastid stroma;GO:0009507 chloroplast;GO:0048046 apoplast;GO:0009570 chloroplast stroma;GO:0005515 protein binding;GO:0005515 protein binding;GO:0005515 protein bindi…
Pp1s97_59V6	1515	148	-3.11499										45.7096	5.39549	1.17198	0	PF00190,PF07883					AT1G02335.1	GL22	germin-like protein subfamily 2 member 2 precursor		GO:0012505 endomembrane system;GO:0030145 manganese ion binding;GO:0045735 nutrient reservoir activity;GO:0048046 apoplast
Pp1s5_15V6	155	15	-3.12858										4.67656	0.546841	0	0.266821	PF02190,PF07728,PF00004	PTHR10046	KOG2004	3.4.21.-	K08675	AT5G26860.1	LON1	lon protease 1		GO:0001666 response to hypoxia;GO:0003697 single-stranded DNA binding;GO:0003727 single-stranded RNA binding;GO:0004176 ATP-dependent peptidase activity;GO:0004176 ATP-dependent peptidase activity;GO:0004252 serine-type endopeptidase activity;GO:0005524 ATP binding;GO:0006200 ATP catabolic process;GO:0006515 misfolded or incompletely synthesized protein catabolic process;GO:0007005 mitochondrion …
Pp1s199_57V6	1483	143	-3.13378										44.7441	5.21321	4.25262	2.7275	PF00069,PF00036	PTHR22982	KOG0032			AT2G17890.1	CPK16	calcium-dependent protein kinase 16		GO:0004672 protein kinase activity;GO:0004674 protein serine/threonine kinase activity;GO:0004683 calmodulin-dependent protein kinase activity;GO:0005509 calcium ion binding;GO:0005524 ATP binding;GO:0006468 protein phosphorylation;GO:0006468 protein phosphorylation
Pp1s213_71V6	187	18	-3.13631										5.64205	0.656209	0	0.118587	PF00097	PTHR22765				AT3G05200.1	ATL6	RING/U-box superfamily protein		GO:0008270 zinc ion binding;GO:0008270 zinc ion binding;GO:0005886 plasma membrane;GO:0004842 ubiquitin-protein ligase activity;GO:0016567 protein ubiquitination;GO:0005886 plasma membrane;GO:0010200 response to chitin
Pp1s24_136V6	198	19	-3.14077										5.97393	0.692665	1.50683	4.951
Pp1s11_397V6	1181	112	-3.15778										35.6324	4.08308	4.42004	2.7275	PF02800	PTHR10836	KOG0657	1.2.1.13	K05298	AT1G12900.2	GAPA-2	glyceraldehyde 3-phosphate dehydrogenase A subunit 2	Carbon fixation in photosynthetic organisms;Metabolic pathways	GO:0006006 glucose metabolic process;GO:0006006 glucose metabolic process;GO:0006006 glucose metabolic process;GO:0006096 glycolysis;GO:0008943 glyceraldehyde-3-phosphate dehydrogenase activity;GO:0008943 glyceraldehyde-3-phosphate dehydrogenase activity;GO:0008943 glyceraldehyde-3-phosphate dehydrogenase activity;GO:0008943 glyceraldehyde-3-phosphate dehydrogenase activity;GO:0051287 NAD or NADH…
Pp1s284_6V6	106	10	-3.16534										3.19816	0.36456	0.535763	0.326114	PF07719,PF00515,PF00504	PTHR21649			K08911	AT1G45474.1	LHCA5	photosystem I light harvesting complex gene 5	Photosynthesis - antenna proteins	GO:0015979 photosynthesis;GO:0030076 light-harvesting complex;GO:0009535 chloroplast thylakoid membrane;GO:0009535 chloroplast thylakoid membrane;GO:0009782 photosystem I antenna complex;GO:0031409 pigment binding;GO:0009768 "photosynthesis, light harvesting in photosystem I";GO:0016020 membrane;GO:0016020 membrane;GO:0009507 chloroplast;GO:0009507 chloroplast
Pp1s96_95V6	318	30	-3.16534										9.59449	1.09368	0.334852	0.266821	PF07714,PF00069	PTHR23257	KOG0192			AT2G17700.1		ACT-like protein tyrosine kinase family protein		GO:0004672 protein kinase activity;GO:0006468 protein phosphorylation;GO:0008152 metabolic process;GO:0004712 protein serine/threonine/tyrosine kinase activity;GO:0005829 cytosol
Pp1s231_32V6	585	55	-3.17028										17.6502	2.00508	0.703189	2.87573	PF04263,PF04265	PTHR13622	KOG3153			AT2G44750.2	TPK2	thiamin pyrophosphokinase 2	Thiamine metabolism;Metabolic pathways	GO:0004788 thiamine diphosphokinase activity;GO:0006772 thiamine metabolic process;GO:0004788 thiamine diphosphokinase activity;GO:0005829 cytosol;GO:0006772 thiamine metabolic process
Pp1s324_49V6	160	15	-3.17438										4.82742	0.546841	0.535763	0.711521	PF00763,PF02882	PTHR10025	KOG0089			AT4G00620.1		Amino acid dehydrogenase family protein		GO:0003824 catalytic activity;GO:0003824 catalytic activity;GO:0005488 binding;GO:0008152 metabolic process;GO:0009396 folic acid-containing compound biosynthetic process;GO:0009396 folic acid-containing compound biosynthetic process;GO:0009507 chloroplast
Pp1s450_31V6	767	71	-3.19268										23.1414	2.58838	2.44442	6.96698	PF03446,PF00393	PTHR11811	KOG2653	1.1.1.44	K00033	AT3G02360.2		6-phosphogluconate dehydrogenase family protein	Pentose phosphate pathway;Glutathione metabolism;Metabolic pathways;Biosynthesis of secondary metabolites	GO:0003824 catalytic activity;GO:0003824 catalytic activity;GO:0004616 phosphogluconate dehydrogenase (decarboxylating) activity;GO:0004616 phosphogluconate dehydrogenase (decarboxylating) activity;GO:0004616 phosphogluconate dehydrogenase (decarboxylating) activity;GO:0005488 binding;GO:0005488 binding;GO:0016491 oxidoreductase activity;GO:0016491 oxidoreductase activity;GO:0050661 NADP or NADPH…
Pp1s111_165V6	750	69	-3.20157										22.6285	2.51547	2.4779	6.07758	PF05605					AT3G05700.1		Drought-responsive family protein		GO:0009414 response to water deprivation
Pp1s36_257V6	359	33	-3.20279										10.8315	1.20305	2.64533	2.34209	PF00005,PF01061,PF08370	PTHR19241	KOG0065			AT1G15210.1	PDR7	pleiotropic drug resistance 7		GO:0042626 "ATPase activity, coupled to transmembrane movement of substances";GO:0009507 chloroplast;GO:0006855 drug transmembrane transport;GO:0005886 plasma membrane;GO:0005886 plasma membrane;GO:0016020 membrane
Pp1s97_106V6	1063	96	-3.22831										32.0722	3.49978	0	0.444701	PF00011	PTHR11527	KOG3591			AT4G27670.1	HSP21	heat shock protein 21		GO:0009408 response to heat;GO:0009507 chloroplast;GO:0009408 response to heat;GO:0009644 response to high light intensity;GO:0042542 response to hydrogen peroxide;GO:0009408 response to heat;GO:0009408 response to heat
Pp1s17_105V6	122	11	-3.23065										3.68091	0.401016	0.569248	0.948695	PF01388					AT4G11400.1		ARID/BRIGHT DNA-binding domain;ELM2 domain protein		GO:0003677 DNA binding;GO:0003677 DNA binding;GO:0005773 vacuole
Pp1s20_280V6	122	11	-3.23065										3.68091	0.401016	0	0.681875	PF00097	PTHR22765				AT3G05200.1	ATL6	RING/U-box superfamily protein		GO:0008270 zinc ion binding;GO:0008270 zinc ion binding;GO:0005886 plasma membrane;GO:0004842 ubiquitin-protein ligase activity;GO:0016567 protein ubiquitination;GO:0005886 plasma membrane;GO:0010200 response to chitin
Pp1s411_3V6	134	12	-3.24047										4.04296	0.437472	2.34396	0.118587						AT5G07020.1		proline-rich family protein		GO:0003674 molecular_function;GO:0008150 biological_process;GO:0009507 chloroplast;GO:0009535 chloroplast thylakoid membrane;GO:0009535 chloroplast thylakoid membrane;GO:0009579 thylakoid;GO:0009507 chloroplast
Pp1s47_171V6	1462	130	-3.2507						52	822	4.06269		44.1105	4.73928	1.74123	24.3696	PF03460,PF01077					AT5G04590.1	SIR	sulfite reductase	Sulfur metabolism;Metabolic pathways	GO:0019419 sulfate reduction;GO:0050311 sulfite reductase (ferredoxin) activity;GO:0009941 chloroplast envelope;GO:0009507 chloroplast;GO:0009409 response to cold;GO:0010319 stromule;GO:0016020 membrane;GO:0009651 response to salt stress;GO:0009507 chloroplast;GO:0048046 apoplast;GO:0009570 chloroplast stroma;GO:0005507 copper ion binding;GO:0005829 cytosol;GO:0009536 plastid;GO:0016002 sulfite r…
Pp1s189_44V6	124	11	-3.25411										3.74125	0.401016	2.17654	2.40138
Pp1s15_137V6	808	71	-3.26781						7	916	7.11199		24.3785	2.58838	0.234396	27.1564	PF00005,PF01061,PF08370	PTHR19241	KOG0065			AT1G59870.1	PEN3	ABC-2 and Plant PDR ABC-type transporter family protein		GO:0042626 "ATPase activity, coupled to transmembrane movement of substances";GO:0009941 chloroplast envelope;GO:0005886 plasma membrane;GO:0009507 chloroplast;GO:0005739 mitochondrion;GO:0005886 plasma membrane;GO:0009507 chloroplast;GO:0009627 systemic acquired resistance;GO:0009817 "defense response to fungus, incompatible interaction";GO:0006855 drug transmembrane transport;GO:0005886 plasma …
Pp1s342_19V6	171	15	-3.27031										5.1593	0.546841	0	0.296467
Pp1s119_146V6	137	12	-3.27241										4.13348	0.437472	0.200911	0
Pp1s79_167V6	332	29	-3.2764										10.0169	1.05723	0.468793	2.34209	PF07977			4.2.1.-	K02372	AT5G10160.1		Thioesterase superfamily protein	Fatty acid biosynthesis;Metabolic pathways	GO:0006633 fatty acid biosynthetic process;GO:0006633 fatty acid biosynthetic process;GO:0016836 hydro-lyase activity;GO:0019171 3-hydroxyacyl-[acyl-carrier-protein] dehydratase activity;GO:0005618 cell wall;GO:0016020 membrane;GO:0009507 chloroplast
Pp1s475_5V6	2998	261	-3.28122										90.4538	9.51503	9.30888	7.53027	PF03358,PF00258		KOG3135			AT4G36750.1		Quinone reductase family protein		GO:0010181 FMN binding;GO:0016491 oxidoreductase activity;GO:0045892 "negative regulation of transcription, DNA-dependent";GO:0005886 plasma membrane;GO:0005886 plasma membrane;GO:0005886 plasma membrane;GO:0005886 plasma membrane;GO:0005886 plasma membrane
Pp1s34_178V6	277	24	-3.28812										8.35747	0.874945	2.84624	2.13456						AT2G30695.1				GO:0003674 molecular_function;GO:0006457 protein folding;GO:0006457 protein folding;GO:0015031 protein transport;GO:0015031 protein transport;GO:0009507 chloroplast;GO:0009507 chloroplast;GO:0009570 chloroplast stroma
Pp1s151_38V6	514	44	-3.30554										15.5081	1.60407	0.636219	2.01598	PF00069	PTHR11909	KOG1163			AT4G26100.1	CK1	casein kinase 1		GO:0004672 protein kinase activity;GO:0004674 protein serine/threonine kinase activity;GO:0005524 ATP binding;GO:0006468 protein phosphorylation;GO:0016301 kinase activity;GO:0009506 plasmodesma
Pp1s48_209V6	176	15	-3.31189										5.31016	0.546841	0.133941	0.118587	PF00646					AT5G46170.1		F-box family protein		GO:0003674 molecular_function;GO:0005575 cellular_component;GO:0010286 heat acclimation
Pp1s225_70V6	141	12	-3.31393										4.25416	0.437472	1.00456	1.36375		PTHR21422				AT5G58510.1				GO:0003674 molecular_function;GO:0008150 biological_process;GO:0009507 chloroplast
Pp1s108_185V6	106	9	-3.31734										3.19816	0.328104	0.334852	0
Pp1s80_198V6	106	9	-3.31734										3.19816	0.328104	1.8082	0.503994	PF00050					AT3G61980.1		serine protease inhibitor, Kazal-type family protein		GO:0004867 serine-type endopeptidase inhibitor activity;GO:0008150 biological_process;GO:0031225 anchored to membrane;GO:0031225 anchored to membrane;GO:0005886 plasma membrane
Pp1s204_123V6	524	44	-3.33334										15.8098	1.60407	1.30592	1.3934	PF00388,PF00387,PF00168	PTHR10336	KOG0169			AT3G08510.1	PLC2	phospholipase C 2	Inositol phosphate metabolism;Metabolic pathways;Phosphatidylinositol signaling system	GO:0006629 lipid metabolic process;GO:0006629 lipid metabolic process;GO:0006629 lipid metabolic process;GO:0007165 signal transduction;GO:0007165 signal transduction;GO:0007165 signal transduction;GO:0007165 signal transduction;GO:0035556 intracellular signal transduction;GO:0035556 intracellular signal transduction;GO:0035556 intracellular signal transduction;GO:0005886 plasma membrane;GO:00058…
Pp1s213_49V6	131	11	-3.33334										3.95245	0.401016	0.100456	0.118587	PF02714	PTHR13018	KOG1134			AT1G30360.1	ERD4	Early-responsive to dehydration stress protein (ERD4)		GO:0009941 chloroplast envelope;GO:0009507 chloroplast;GO:0005773 vacuole;GO:0005886 plasma membrane;GO:0005774 vacuolar membrane;GO:0005886 plasma membrane;GO:0016020 membrane;GO:0005886 plasma membrane
Pp1s1_815V6	263	22	-3.33883						17	267	4.05337		7.93507	0.802033	0.569248	7.91568	PF01293			4.1.1.49	K01610	AT4G37870.1	PCK1	phosphoenolpyruvate carboxykinase 1	Glycolysis / Gluconeogenesis;Citrate cycle (TCA cycle);Pyruvate metabolism;Carbon fixation in photosynthetic organisms;Metabolic pathways;Biosynthesis of secondary metabolites	GO:0004612 phosphoenolpyruvate carboxykinase (ATP) activity;GO:0005524 ATP binding;GO:0006094 gluconeogenesis;GO:0005730 nucleolus;GO:0046686 response to cadmium ion;GO:0005515 protein binding;GO:0005515 protein binding;GO:0005515 protein binding;GO:0005515 protein binding;GO:0005515 protein binding;GO:0005515 protein binding;GO:0016036 cellular response to phosphate starvation;GO:0016020 membran…
Pp1s455_6V6	480	40	-3.34431										14.4823	1.45824	0	0.474348	PF00627,PF07728,PF00004,PF12002	PTHR13779				AT1G24290.1		AAA-type ATPase family protein		GO:0000166 nucleotide binding;GO:0005524 ATP binding;GO:0005524 ATP binding;GO:0017111 nucleoside-triphosphatase activity
Pp1s410_47V6	109	9	-3.3576										3.28868	0.328104	1.97563	0.355761	PF00310,PF00733	PTHR11772	KOG0571	6.3.5.4	K01953	AT5G10240.1	ASN3	asparagine synthetase 3	Alanine, aspartate and glutamate metabolism;Nitrogen metabolism;Metabolic pathways;Biosynthesis of secondary metabolites	GO:0004066 asparagine synthase (glutamine-hydrolyzing) activity;GO:0006529 asparagine biosynthetic process;GO:0005829 cytosol;GO:0005829 cytosol;GO:0004071 aspartate-ammonia ligase activity;GO:0006529 asparagine biosynthetic process
Pp1s98_70V6	109	9	-3.3576										3.28868	0.328104	0.100456	0.474348	PF01694	PTHR22936	KOG2289			AT2G29050.1	RBL1	RHOMBOID-like 1		GO:0004252 serine-type endopeptidase activity;GO:0004252 serine-type endopeptidase activity;GO:0005794 Golgi apparatus
Pp1s47_119V6	206	17	-3.35838										6.2153	0.619753	0.167426	0.0889402		PTHR11999	KOG0629	4.1.1.22	K01590	AT1G43710.1	emb1075	Pyridoxal phosphate (PLP)-dependent transferases superfamily protein	Histidine metabolism;Metabolic pathways;Biosynthesis of secondary metabolites	GO:0003824 catalytic activity;GO:0006520 cellular amino acid metabolic process;GO:0009793 embryo development ending in seed dormancy;GO:0016831 carboxy-lyase activity;GO:0016831 carboxy-lyase activity;GO:0030170 pyridoxal phosphate binding
Pp1s191_128V6	608	50	-3.36342						50	443	3.22744		18.3442	1.8228	1.67426	13.1335	PF04526	PTHR23130	KOG4293			AT5G35735.1		Auxin-responsive family protein		GO:0016020 membrane;GO:0005886 plasma membrane
Pp1s79_140V6	647	53	-3.36905						158	1108	2.8901		19.5209	1.93217	5.29066	32.8486	PF00310,PF04898,PF01645,PF01493,PF07992,PF00070	PTHR11938	KOG0399	1.4.1.13,1.4.1.14	K00264	AT5G53460.2	GLT1	NADH-dependent glutamate synthase 1	Alanine, aspartate and glutamate metabolism;Nitrogen metabolism;Metabolic pathways;Biosynthesis of secondary metabolites	GO:0042128 nitrate assimilation;GO:0006537 glutamate biosynthetic process;GO:0016040 glutamate synthase (NADH) activity;GO:0019676 ammonia assimilation cycle;GO:0048589 developmental growth;GO:0009507 chloroplast;GO:0046686 response to cadmium ion;GO:0009507 chloroplast;GO:0009570 chloroplast stroma;GO:0005829 cytosol;GO:0006537 glutamate biosynthetic process;GO:0009536 plastid;GO:0016040 glutama…
Pp1s72_288V6	151	12	-3.41279										4.55588	0.437472	2.44442	0.503994						AT3G61870.1				GO:0003674 molecular_function;GO:0008150 biological_process;GO:0009706 chloroplast inner membrane;GO:0009941 chloroplast envelope;GO:0009941 chloroplast envelope;GO:0009507 chloroplast;GO:0009507 chloroplast
Pp1s40_190V6	341	27	-3.41808						18	109	2.6784		10.2884	0.984313	0.602733	3.23149	PF00012	PTHR19375	KOG0103			AT1G79930.1	HSP91	heat shock protein 91		GO:0006457 protein folding;GO:0046686 response to cadmium ion;GO:0046686 response to cadmium ion;GO:0005886 plasma membrane;GO:0005886 plasma membrane;GO:0005829 cytosol;GO:0005829 cytosol;GO:0005634 nucleus;GO:0005829 cytosol;GO:0005524 ATP binding;GO:0005634 nucleus;GO:0009408 response to heat
Pp1s252_24V6	139	11	-3.41885										4.19382	0.401016	0.368337	0.978342
Pp1s224_112V6	114	9	-3.42231										3.43954	0.328104	0	0.0592934	PF00804,PF05739	PTHR19957	KOG0809		K08489	AT5G26980.2	SYP41	syntaxin of plants 41	SNARE interactions in vesicular transport	GO:0005515 protein binding;GO:0005802 trans-Golgi network;GO:0005484 SNAP receptor activity;GO:0005802 trans-Golgi network;GO:0006886 intracellular protein transport;GO:0006944 cellular membrane fusion;GO:0030140 trans-Golgi network transport vesicle
Pp1s141_43V6	355	28	-3.42366										10.7108	1.02077	0.602733	1.15622	PF03946,PF00298	PTHR11661	KOG3257		K02867	AT1G32990.1	PRPL11	plastid ribosomal protein l11	Ribosome	GO:0003735 structural constituent of ribosome;GO:0003735 structural constituent of ribosome;GO:0005840 ribosome;GO:0006412 translation;GO:0022625 cytosolic large ribosomal subunit;GO:0042254 ribosome biogenesis;GO:0009941 chloroplast envelope;GO:0009507 chloroplast;GO:0022626 cytosolic ribosome;GO:0022626 cytosolic ribosome;GO:0009570 chloroplast stroma;GO:0016020 membrane;GO:0009507 chloroplast;…
Pp1s49_225V6	102	8	-3.43177										3.07748	0.291648	1.8082	0.474348	PF07002	PTHR10857				AT5G14420.2	RGLG2	RING domain ligase2		GO:0004842 ubiquitin-protein ligase activity;GO:0005886 plasma membrane;GO:0009690 cytokinin metabolic process;GO:0009850 auxin metabolic process
Pp1s65_52V6	118	9	-3.47206										3.56022	0.328104	0.301367	1.36375	PF00046,PF02183	PTHR19418			K09338	AT4G40060.1	HB16	homeobox protein 16		GO:0003700 sequence-specific DNA binding transcription factor activity;GO:0005634 nucleus;GO:0005634 nucleus;GO:0006355 "regulation of transcription, DNA-dependent";GO:0003700 sequence-specific DNA binding transcription factor activity;GO:0043565 sequence-specific DNA binding;GO:0009637 response to blue light;GO:0030308 negative regulation of cell growth;GO:0048510 regulation of timing of transit…
Pp1s42_208V6	105	8	-3.47359										3.16799	0.291648	0.401822	0.118587	PF04536					AT1G54780.1	TLP18.3	thylakoid lumen 18.3 kDa protein		GO:0003674 molecular_function;GO:0009543 chloroplast thylakoid lumen;GO:0031977 thylakoid lumen;GO:0009543 chloroplast thylakoid lumen;GO:0009579 thylakoid;GO:0009535 chloroplast thylakoid membrane;GO:0009507 chloroplast;GO:0009535 chloroplast thylakoid membrane;GO:0009535 chloroplast thylakoid membrane;GO:0010206 photosystem II repair;GO:0009507 chloroplast;GO:0009579 thylakoid
Pp1s270_57V6	381	29	-3.47501										11.4953	1.05723	2.77927	1.12658						AT1G71500.1		Rieske (2Fe-2S) domain-containing protein		GO:0016491 oxidoreductase activity;GO:0051537 "2 iron, 2 sulfur cluster binding";GO:0055114 oxidation-reduction process;GO:0009941 chloroplast envelope;GO:0009535 chloroplast thylakoid membrane;GO:0009507 chloroplast;GO:0009535 chloroplast thylakoid membrane;GO:0009535 chloroplast thylakoid membrane;GO:0009507 chloroplast
Pp1s204_121V6	171	13	-3.47676										5.1593	0.473928	2.57836	0.889402	PF00160	PTHR11071:SF14				AT3G15520.1		Cyclophilin-like peptidyl-prolyl cis-trans isomerase family protein		GO:0003755 peptidyl-prolyl cis-trans isomerase activity;GO:0003755 peptidyl-prolyl cis-trans isomerase activity;GO:0006457 protein folding;GO:0009543 chloroplast thylakoid lumen;GO:0009543 chloroplast thylakoid lumen;GO:0031977 thylakoid lumen;GO:0009535 chloroplast thylakoid membrane;GO:0009579 thylakoid;GO:0009507 chloroplast;GO:0009535 chloroplast thylakoid membrane;GO:0009535 chloroplast thyl…
Pp1s76_46V6	159	12	-3.48726										4.79725	0.437472	0.200911	1.66022	PF04481
Pp1s372_55V6	226	17	-3.49206										6.81873	0.619753	0.100456	0.444701	PF00535					AT1G32180.1	CSLD6	cellulose synthase-like D6		GO:0000271 polysaccharide biosynthetic process;GO:0009832 plant-type cell wall biogenesis;GO:0016020 membrane;GO:0016757 "transferase activity, transferring glycosyl groups";GO:0016759 cellulose synthase activity;GO:0016759 cellulose synthase activity;GO:0030244 cellulose biosynthetic process
Pp1s134_68V6	173	13	-3.49353										5.21965	0.473928	0.502278	0.355761						AT1G18060.1				GO:0008150 biological_process;GO:0009507 chloroplast;GO:0009507 chloroplast
Pp1s149_288V6	320	24	-3.49631										9.65484	0.874945	0.97107	2.01598	PF04043,PF01095					AT5G49180.1		Plant invertase/pectin methylesterase inhibitor superfamily	Pentose and glucuronate interconversions;Starch and sucrose metabolism;Metabolic pathways	GO:0004857 enzyme inhibitor activity;GO:0009505 plant-type cell wall;GO:0030599 pectinesterase activity;GO:0030599 pectinesterase activity;GO:0042545 cell wall modification
Pp1s37_126V6	402	30	-3.50351						68	296	2.20213		12.1289	1.09368	2.27699	8.77543	PF00010					AT5G08130.1	BIM1	basic helix-loop-helix (bHLH) DNA-binding superfamily protein		GO:0003677 DNA binding;GO:0005634 nucleus;GO:0005634 nucleus;GO:0005634 nucleus;GO:0005634 nucleus;GO:0005634 nucleus;GO:0005634 nucleus;GO:0003700 sequence-specific DNA binding transcription factor activity;GO:0006355 "regulation of transcription, DNA-dependent";GO:0003700 sequence-specific DNA binding transcription factor activity;GO:0003700 sequence-specific DNA binding transcription factor ac…
Pp1s47_230V6	1272	94	-3.51764						40	276	2.86673		38.378	3.42687	1.33941	8.1825	PF00097	PTHR23041	KOG1039			AT5G01520.1		RING/U-box superfamily protein		GO:0008270 zinc ion binding;GO:0008270 zinc ion binding
Pp1s59_40V6	519	38	-3.53101						0	289	37.1674		15.6589	1.38533	0	8.5679	PF04819	PTHR16007				AT1G55230.1		Family of unknown function (DUF716)		GO:0008150 biological_process;GO:0012505 endomembrane system
Pp1s442_10V6	754	54	-3.56288										22.7492	1.96863	1.64077	2.54962	PF06200,PF09425					AT1G74950.1	TIFY10B	TIFY domain/Divergent CCT motif family protein	Plant hormone signal transduction;Plant-pathogen interaction	GO:0009753 response to jasmonic acid stimulus;GO:0009611 response to wounding;GO:0005515 protein binding;GO:0005515 protein binding;GO:0005515 protein binding
Pp1s242_98V6	645	46	-3.56894										19.4605	1.67698	0.736674	2.84609	PF00036	PTHR10891	KOG0027			AT1G66410.1	CAM4	calmodulin 4	Phosphatidylinositol signaling system;Plant-pathogen interaction	GO:0005509 calcium ion binding;GO:0005515 protein binding;GO:0005886 plasma membrane;GO:0005515 protein binding;GO:0005515 protein binding;GO:0005515 protein binding;GO:0005515 protein binding;GO:0005515 protein binding;GO:0005515 protein binding;GO:0005515 protein binding;GO:0005515 protein binding;GO:0005515 protein binding;GO:0005515 protein binding;GO:0005515 protein binding;GO:0005515 protei…
Pp1s245_25V6	691	49	-3.57718										20.8484	1.78635	1.40638	0.237174	PF00515,PF07719,PF04564	PTHR22904	KOG4642	6.3.2.19	K09561	AT3G07370.1	CHIP	carboxyl terminus of HSC70-interacting protein	Ubiquitin mediated proteolysis;Protein processing in endoplasmic reticulum	GO:0004842 ubiquitin-protein ligase activity;GO:0009266 response to temperature stimulus;GO:0009266 response to temperature stimulus;GO:0016567 protein ubiquitination;GO:0004842 ubiquitin-protein ligase activity;GO:0009651 response to salt stress;GO:0009737 response to abscisic acid stimulus;GO:0051087 chaperone binding
Pp1s328_15V6	255	18	-3.58377										7.6937	0.656209	0.267882	2.19386
Pp1s388_7V6	699	49	-3.59378										21.0898	1.78635	1.30592	0.592934	PF07002,PF00097	PTHR10857	KOG4172			AT5G14420.3	RGLG2	RING domain ligase2		GO:0004842 ubiquitin-protein ligase activity;GO:0005886 plasma membrane;GO:0009690 cytokinin metabolic process;GO:0009850 auxin metabolic process
Pp1s1_315V6	502	35	-3.6016						15	819	5.85097		15.146	1.27596	0.502278	24.2807	PF03151	PTHR11132	KOG1441			AT1G61800.1	GPT2	glucose-6-phosphate/phosphate translocator 2		GO:0015152 glucose-6-phosphate transmembrane transporter activity;GO:0015297 antiporter activity;GO:0015712 hexose phosphate transport;GO:0005315 inorganic phosphate transmembrane transporter activity;GO:0007276 gamete generation;GO:0015120 phosphoglycerate transmembrane transporter activity;GO:0015152 glucose-6-phosphate transmembrane transporter activity;GO:0015713 phosphoglycerate transport;GO…
Pp1s65_194V6	322	22	-3.63083										9.71518	0.802033	0.401822	2.75715	PF00535	PTHR10859:SF19		2.4.1.32	K13680	AT5G03760.1	ATCSLA09	Nucleotide-diphospho-sugar transferases superfamily protein		GO:0016757 "transferase activity, transferring glycosyl groups";GO:0016757 "transferase activity, transferring glycosyl groups";GO:0009294 DNA mediated transformation;GO:0009617 response to bacterium;GO:0051753 mannan synthase activity
Pp1s45_4V6	369	25	-3.64297										11.1332	0.911401	0.200911	0.592934	PF01152					AT4G32690.1	GLB3	hemoglobin 3		GO:0005575 cellular_component;GO:0001666 response to hypoxia;GO:0005344 oxygen transporter activity;GO:0009733 response to auxin stimulus;GO:0015671 oxygen transport
Pp1s2_123V6	119	8	-3.65416										3.59039	0.291648	1.10501	0.652228	PF00082,PF12580	PTHR10795	KOG1114	3.4.14.10	K01280	AT4G20850.1	TPP2	tripeptidyl peptidase ii		GO:0004252 serine-type endopeptidase activity;GO:0008152 metabolic process;GO:0009507 chloroplast;GO:0005773 vacuole;GO:0005773 vacuole;GO:0022626 cytosolic ribosome;GO:0005737 cytoplasm;GO:0006508 proteolysis;GO:0008240 tripeptidyl-peptidase activity;GO:0005774 vacuolar membrane;GO:0016020 membrane;GO:0009507 chloroplast;GO:0005829 cytosol
Pp1s1_853V6	120	8	-3.66623										3.62056	0.291648	0	0
Pp1s3_318V6	364	24	-3.68218										10.9824	0.874945	0.0669704	0.0592934	PF00403	PTHR22814	KOG1603			AT1G06330.1		Heavy metal transport/detoxification superfamily protein		GO:0005507 copper ion binding;GO:0005575 cellular_component;GO:0006825 copper ion transport;GO:0030001 metal ion transport;GO:0046872 metal ion binding
Pp1s35_376V6	1585	104	-3.68917										47.8216	3.79143	6.19476	4.5063						AT4G32300.1	SD2-5	S-domain-2 5		GO:0016301 kinase activity;GO:0030246 carbohydrate binding;GO:0005886 plasma membrane;GO:0005886 plasma membrane;GO:0004672 protein kinase activity;GO:0031625 ubiquitin protein ligase binding;GO:0031625 ubiquitin protein ligase binding;GO:0031625 ubiquitin protein ligase binding;GO:0046777 protein autophosphorylation
Pp1s56_136V6	4016	262	-3.69746										121.168	9.55148	5.22369	9.13119						AT3G14280.1				GO:0003674 molecular_function;GO:0008150 biological_process
Pp1s74_232V6	222	14	-3.74641										6.69804	0.510385	0.83713	1.8381	PF00561	PTHR10992	KOG1454			AT4G37470.1		alpha/beta-Hydrolases superfamily protein		GO:0005575 cellular_component;GO:0016787 hydrolase activity;GO:0080167 response to karrikin;GO:0009640 photomorphogenesis;GO:0009704 de-etiolation
Pp1s138_47V6	144	9	-3.75934										4.34468	0.328104	2.87973	4.62489	PF00332,PF07983					AT4G29360.1		O-Glycosyl hydrolases family 17 protein		GO:0003824 catalytic activity;GO:0003824 catalytic activity;GO:0004553 "hydrolase activity, hydrolyzing O-glycosyl compounds";GO:0004553 "hydrolase activity, hydrolyzing O-glycosyl compounds";GO:0004553 "hydrolase activity, hydrolyzing O-glycosyl compounds";GO:0005975 carbohydrate metabolic process;GO:0005975 carbohydrate metabolic process;GO:0043169 cation binding;GO:0043169 cation binding;GO:00…
Pp1s13_171V6	940	58	-3.77788										28.3611	2.11445	3.54943	5.72182	PF00289,PF02786,PF02785,PF00364,PF08326,PF01039	PTHR18866	KOG0368	6.3.4.14,6.4.1.2	K11262	AT1G36160.1	ACC1	acetyl-CoA carboxylase 1	Fatty acid biosynthesis;Pyruvate metabolism;Propanoate metabolism;Metabolic pathways	GO:0003989 acetyl-CoA carboxylase activity;GO:0010072 primary shoot apical meristem specification;GO:0030497 fatty acid elongation;GO:0005886 plasma membrane;GO:0003989 acetyl-CoA carboxylase activity;GO:0009793 embryo development ending in seed dormancy;GO:0009933 meristem structural organization;GO:0009735 response to cytokinin stimulus;GO:0009793 embryo development ending in seed dormancy;GO:0…
Pp1s66_45V6	147	9	-3.78909										4.43519	0.328104	1.64077	1.18587	PF01040	PTHR13929	KOG4581	2.5.1.74	K02548	AT1G60600.2	ABC4	UbiA prenyltransferase family protein	Ubiquinone and other terpenoid-quinone biosynthesis;Metabolic pathways;Biosynthesis of secondary metabolites	GO:0004659 prenyltransferase activity;GO:0009507 chloroplast;GO:0009772 photosynthetic electron transport in photosystem II;GO:0010236 plastoquinone biosynthetic process;GO:0042372 phylloquinone biosynthetic process;GO:0046428 "1,4-dihydroxy-2-naphthoate octaprenyltransferase activity"
Pp1s1_406V6	151	9	-3.82782										4.55588	0.328104	0	0.207527
Pp1s55_140V6	338	20	-3.8383										10.1979	0.729121	1.03804	0.919048		PTHR10366	KOG1429			AT3G63140.1	CSP41A	chloroplast stem-loop binding protein of 41 kDa		GO:0003729 mRNA binding;GO:0009941 chloroplast envelope;GO:0009507 chloroplast;GO:0009570 chloroplast stroma;GO:0010287 plastoglobule;GO:0010287 plastoglobule;GO:0009579 thylakoid;GO:0008266 poly(U) RNA binding;GO:0006364 rRNA processing;GO:0009507 chloroplast;GO:0048046 apoplast;GO:0009570 chloroplast stroma
Pp1s1_402V6	546	32	-3.8521										16.4736	1.16659	1.23895	1.80845	PF03152,PF00096,PF02176	PTHR12555	KOG1816			AT4G15420.1		Ubiquitin fusion degradation UFD1 family protein		GO:0006508 proteolysis;GO:0006511 ubiquitin-dependent protein catabolic process;GO:0008233 peptidase activity;GO:0008270 zinc ion binding
Pp1s443_12V6	1075	63	-3.85219						74	1066	3.92868		32.4342	2.29673	2.4779	31.6034	PF00067	PTHR19383	KOG0157		K09832	AT2G34500.1	CYP710A1	cytochrome P450, family 710, subfamily A, polypeptide 1	Steroid biosynthesis;Biosynthesis of secondary metabolites	GO:0019825 oxygen binding;GO:0055114 oxidation-reduction process;GO:0000249 C-22 sterol desaturase activity
Pp1s53_155V6	155	9	-3.86554										4.67656	0.328104	1.00456	0.622581						AT1G10660.4
Pp1s23_336V6	605	35	-3.87085										18.2537	1.27596	0.100456	0.326114	PF00403	PTHR22814	KOG1603			AT4G10465.1		Heavy metal transport/detoxification superfamily protein		GO:0009507 chloroplast;GO:0030001 metal ion transport;GO:0046872 metal ion binding
Pp1s456_4V6	260	15	-3.87482										7.84455	0.546841	1.03804	0.830108	PF00515,PF07719,PF08238,PF07721	PTHR23083	KOG4626			AT3G11540.1	SPY	Tetratricopeptide repeat (TPR)-like superfamily protein		GO:0016757 "transferase activity, transferring glycosyl groups";GO:0016262 protein N-acetylglucosaminyltransferase activity;GO:0009938 negative regulation of gibberellic acid mediated signaling pathway;GO:0005634 nucleus;GO:0005634 nucleus;GO:0005737 cytoplasm;GO:0009740 gibberellic acid mediated signaling pathway;GO:0005515 protein binding;GO:0005515 protein binding;GO:0009736 cytokinin mediated…
Pp1s38_283V6	556	32	-3.87829										16.7753	1.16659	0.0669704	1.57128
Pp1s194_15V6	435	25	-3.88036										13.1245	0.911401	0.133941	0.652228	PF00011	PTHR11527	KOG3591		K13993	AT1G53540.1		HSP20-like chaperones superfamily protein	Protein processing in endoplasmic reticulum	GO:0009408 response to heat
Pp1s280_8V6	122	7	-3.88273										3.68091	0.255192	0.234396	0.148234	PF01715	PTHR11088	KOG1384	2.5.1.75	K00791	AT5G20040.1	IPT9	isopentenyltransferase 9	Zeatin biosynthesis;Metabolic pathways;Biosynthesis of secondary metabolites	GO:0005524 ATP binding;GO:0005524 ATP binding;GO:0005524 ATP binding;GO:0005524 ATP binding;GO:0008033 tRNA processing;GO:0052381 tRNA dimethylallyltransferase activity;GO:0009691 cytokinin biosynthetic process
Pp1s433_10V6	3200	182	-3.89541										96.5484	6.635	6.3287	12.8963	PF02678,PF07883	PTHR13903				AT2G43120.1		RmlC-like cupins superfamily protein		GO:0008150 biological_process;GO:0005516 calmodulin binding;GO:0005886 plasma membrane
Pp1s83_53V6	195	11	-3.90724										5.88342	0.401016	2.7123	4.5063	PF00248	PTHR11732	KOG1575			AT1G04690.1	KAB1	potassium channel beta subunit 1		GO:0005267 potassium channel activity;GO:0006813 potassium ion transport;GO:0006813 potassium ion transport;GO:0016491 oxidoreductase activity;GO:0055085 transmembrane transport;GO:0055114 oxidation-reduction process;GO:0005886 plasma membrane;GO:0016020 membrane;GO:0005886 plasma membrane;GO:0005829 cytosol
Pp1s75_115V6	142	8	-3.90909						15	198	3.8026		4.28433	0.291648	0.502278	5.87005	PF04818		KOG2669			AT5G23150.1	HUA2	Tudor/PWWP/MBT domain-containing protein		GO:0003700 sequence-specific DNA binding transcription factor activity;GO:0048497 maintenance of floral organ identity;GO:0009910 negative regulation of flower development;GO:0048510 regulation of timing of transition from vegetative to reproductive phase
Pp1s70_261V6	252	14	-3.92927										7.60318	0.510385	0.133941	0.385407	PF01842	PTHR13734:SF1				AT1G76990.2	ACR3	ACT domain repeat 3		GO:0006807 nitrogen compound metabolic process;GO:0006807 nitrogen compound metabolic process;GO:0006807 nitrogen compound metabolic process;GO:0006807 nitrogen compound metabolic process;GO:0006807 nitrogen compound metabolic process;GO:0008152 metabolic process;GO:0008152 metabolic process;GO:0008152 metabolic process;GO:0008152 metabolic process;GO:0008152 metabolic process;GO:0005829 cytosol;…
Pp1s115_21V6	181	10	-3.93726										5.46102	0.36456	0.770159	2.2235	PF00106	PTHR19410	KOG4169			AT1G49670.2	NQR	ARP protein (REF)		GO:0003824 catalytic activity;GO:0003824 catalytic activity;GO:0005488 binding;GO:0005488 binding;GO:0008152 metabolic process;GO:0008270 zinc ion binding;GO:0008270 zinc ion binding;GO:0008270 zinc ion binding;GO:0016491 oxidoreductase activity;GO:0016491 oxidoreductase activity;GO:0016491 oxidoreductase activity;GO:0005739 mitochondrion;GO:0005777 peroxisome;GO:0005777 peroxisome;GO:0006979 res…
Pp1s60_148V6	218	12	-3.94257										6.57736	0.437472	0.636219	0.711521	PF00847					AT4G17500.1	ERF-1	ethylene responsive element binding factor 1		GO:0003677 DNA binding;GO:0003700 sequence-specific DNA binding transcription factor activity;GO:0005643 nuclear pore;GO:0006355 "regulation of transcription, DNA-dependent";GO:0045893 "positive regulation of transcription, DNA-dependent";GO:0003700 sequence-specific DNA binding transcription factor activity;GO:0010200 response to chitin
Pp1s54_173V6	185	10	-3.9688						19	390	4.43954		5.5817	0.36456	0.636219	11.5622	PF01794,PF08022,PF08030	PTHR11972	KOG0039			AT5G49740.1	FRO7	ferric reduction oxidase 7		GO:0016020 membrane;GO:0016491 oxidoreductase activity;GO:0000293 ferric-chelate reductase activity;GO:0000293 ferric-chelate reductase activity;GO:0009507 chloroplast;GO:0009767 photosynthetic electron transport chain
Pp1s84_106V6	299	16	-3.98335										9.02124	0.583297	0.167426	1.74916	PF03106					AT2G46400.1	WRKY46	WRKY DNA-binding protein 46		GO:0003700 sequence-specific DNA binding transcription factor activity;GO:0003700 sequence-specific DNA binding transcription factor activity;GO:0003700 sequence-specific DNA binding transcription factor activity;GO:0006355 "regulation of transcription, DNA-dependent";GO:0003700 sequence-specific DNA binding transcription factor activity;GO:0005730 nucleolus;GO:0010200 response to chitin
Pp1s27_81V6	1089	58	-3.99015										32.8566	2.11445	3.382	2.81644	PF08267,PF01717		KOG2263	2.1.1.14	K00549	AT5G17920.2	ATMS1	Cobalamin-independent synthase family protein	Cysteine and methionine metabolism;Selenoamino acid metabolism;Metabolic pathways;Biosynthesis of secondary metabolites	GO:0003871 5-methyltetrahydropteroyltriglutamate-homocysteine S-methyltransferase activity;GO:0005829 cytosol;GO:0009086 methionine biosynthetic process;GO:0005829 cytosol;GO:0008705 methionine synthase activity;GO:0046686 response to cadmium ion;GO:0005507 copper ion binding;GO:0005774 vacuolar membrane;GO:0005774 vacuolar membrane;GO:0005886 plasma membrane;GO:0005886 plasma membrane;GO:0016020…
Pp1s306_26V6	116	6	-4.03236										3.49988	0.218736	0.669704	0.17788	PF00141			1.11.1.7	K00430	AT5G64120.1		Peroxidase superfamily protein	Phenylalanine metabolism;Phenylpropanoid biosynthesis;Metabolic pathways;Biosynthesis of secondary metabolites	GO:0004601 peroxidase activity;GO:0005618 cell wall;GO:0004601 peroxidase activity;GO:0005618 cell wall;GO:0045730 respiratory burst;GO:0050832 defense response to fungus;GO:0016020 membrane;GO:0048046 apoplast
Pp1s53_22V6	353	18	-4.05294										10.6505	0.656209	2.67882	2.13456		PTHR22274:SF3	KOG4498			AT2G37240.1		Thioredoxin superfamily protein		GO:0008150 biological_process;GO:0016209 antioxidant activity;GO:0016491 oxidoreductase activity;GO:0009507 chloroplast
Pp1s32_193V6	255	13	-4.05326										7.6937	0.473928	0	0.889402
Pp1s233_104V6	438	22	-4.0747										13.2151	0.802033	1.30592	0	PF08534,PF00578	PTHR10681	KOG0855			AT3G26060.1	ATPRX Q	Thioredoxin superfamily protein		GO:0016209 antioxidant activity;GO:0045454 cell redox homeostasis;GO:0045454 cell redox homeostasis;GO:0005515 protein binding;GO:0009941 chloroplast envelope;GO:0009507 chloroplast;GO:0009533 chloroplast stromal thylakoid;GO:0009535 chloroplast thylakoid membrane;GO:0010287 plastoglobule;GO:0010287 plastoglobule;GO:0009535 chloroplast thylakoid membrane;GO:0051920 peroxiredoxin activity;GO:00095…
Pp1s34_240V6	100	5	-4.08127										3.01714	0.18228	0.368337	0.770815	PF08879					AT2G42040.1				GO:0003674 molecular_function;GO:0008150 biological_process
Pp1s34_294V6	183	9	-4.10512										5.52136	0.328104	0.401822	1.8381	PF08392,PF02797,PF08541					AT1G19440.1	KCS4	3-ketoacyl-CoA synthase 4		GO:0003824 catalytic activity;GO:0016747 "transferase activity, transferring acyl groups other than amino-acyl groups";GO:0000038 very long-chain fatty acid metabolic process;GO:0042335 cuticle development
Pp1s164_95V6	245	12	-4.11102										7.39198	0.437472	0.100456	1.24516	PF00403	PTHR22814	KOG1603
Pp1s56_122V6	103	5	-4.12392										3.10765	0.18228	0.301367	0.296467	PF00036	PTHR10891				AT2G27030.3	CAM5	calmodulin 5		GO:0005509 calcium ion binding;GO:0005509 calcium ion binding;GO:0005509 calcium ion binding;GO:0005509 calcium ion binding;GO:0005515 protein binding;GO:0005515 protein binding;GO:0005515 protein binding;GO:0005515 protein binding;GO:0005515 protein binding;GO:0005515 protein binding;GO:0005515 protein binding;GO:0005515 protein binding;GO:0005515 protein binding;GO:0005515 protein binding;GO:00…
Pp1s73_118V6	352	17	-4.13131						9	119	3.80503		10.6203	0.619753	0.301367	3.52796	PF00249					AT2G42660.1		Homeodomain-like superfamily protein		GO:0003677 DNA binding;GO:0003700 sequence-specific DNA binding transcription factor activity;GO:0003700 sequence-specific DNA binding transcription factor activity;GO:0006355 "regulation of transcription, DNA-dependent"
Pp1s296_56V6	332	16	-4.13438										10.0169	0.583297	0	0.919048	PF03094					AT5G53760.1	MLO11	Seven transmembrane MLO family protein		GO:0005516 calmodulin binding;GO:0005886 plasma membrane;GO:0006952 defense response;GO:0008219 cell death;GO:0008219 cell death;GO:0008219 cell death;GO:0016021 integral to membrane;GO:0016021 integral to membrane
Pp1s215_82V6	168	8	-4.15166										5.06879	0.291648	0.502278	0.800462	PF00542	PTHR11809	KOG1715			AT3G27830.1	RPL12-A	ribosomal protein L12-A	Ribosome	GO:0003735 structural constituent of ribosome;GO:0003735 structural constituent of ribosome;GO:0006412 translation;GO:0015934 large ribosomal subunit;GO:0009535 chloroplast thylakoid membrane;GO:0009579 thylakoid;GO:0009507 chloroplast;GO:0009535 chloroplast thylakoid membrane;GO:0009535 chloroplast thylakoid membrane;GO:0009295 nucleoid;GO:0009579 thylakoid;GO:0009507 chloroplast;GO:0009570 chlo…
Pp1s127_40V6	255	12	-4.16874										7.6937	0.437472	0	0						AT5G01750.2		Protein of unknown function (DUF567)		GO:0003674 molecular_function;GO:0008150 biological_process;GO:0009507 chloroplast;GO:0009507 chloroplast
Pp1s109_232V6	9203	427	-4.18914						721	6011	3.13967		277.667	15.5667	24.1428	178.206
Pp1s284_71V6	109	5	-4.2056										3.28868	0.18228	0	0.296467	PF02466	PTHR15371				AT2G28900.1	OEP16-1	outer plastid envelope protein 16-1		GO:0008565 protein transporter activity;GO:0015031 protein transport;GO:0015450 P-P-bond-hydrolysis-driven protein transmembrane transporter activity;GO:0009941 chloroplast envelope;GO:0009941 chloroplast envelope;GO:0009507 chloroplast;GO:0005773 vacuole;GO:0009611 response to wounding;GO:0009753 response to jasmonic acid stimulus;GO:0009744 response to sucrose stimulus;GO:0009749 response to gl…
Pp1s30_266V6	109	5	-4.2056										3.28868	0.18228	0	0	PF00514	PTHR23315	KOG4224			AT5G50900.1		ARM repeat superfamily protein		GO:0005488 binding;GO:0005575 cellular_component;GO:0008150 biological_process
Pp1s17_263V6	328	15	-4.21001										9.89621	0.546841	0	0
Pp1s4_171V6	961	43	-4.24147						80	2475	5.03142		28.9947	1.56761	2.67882	73.3756	PF02298					AT2G31050.1		Cupredoxin superfamily protein		GO:0005507 copper ion binding;GO:0005507 copper ion binding;GO:0009055 electron carrier activity;GO:0031225 anchored to membrane;GO:0031225 anchored to membrane
Pp1s242_73V6	114	5	-4.27031										3.43954	0.18228	0.736674	0.711521	PF00400,PF03372	PTHR11200	KOG0565			AT2G43900.1		Endonuclease/exonuclease/phosphatase family protein		GO:0004437 inositol or phosphatidylinositol phosphatase activity;GO:0004445 inositol-polyphosphate 5-phosphatase activity;GO:0008150 biological_process;GO:0080008 CUL4 RING ubiquitin ligase complex
Pp1s21_54V6	164	7	-4.30954										4.9481	0.255192	0.267882	0.0592934
Pp1s426_30V6	211	9	-4.31052										6.36616	0.328104	0	0	PF03106					AT5G26170.1	WRKY50	WRKY DNA-binding protein 50		GO:0003700 sequence-specific DNA binding transcription factor activity;GO:0003700 sequence-specific DNA binding transcription factor activity;GO:0003700 sequence-specific DNA binding transcription factor activity;GO:0006355 "regulation of transcription, DNA-dependent";GO:0003700 sequence-specific DNA binding transcription factor activity;GO:0005515 protein binding;GO:0009867 jasmonic acid mediate…
Pp1s280_49V6	316	13	-4.36269										9.53415	0.473928	2.81276	2.07527	PF00332					AT5G55180.2		O-Glycosyl hydrolases family 17 protein		GO:0003824 catalytic activity;GO:0003824 catalytic activity;GO:0004553 "hydrolase activity, hydrolyzing O-glycosyl compounds";GO:0004553 "hydrolase activity, hydrolyzing O-glycosyl compounds";GO:0004553 "hydrolase activity, hydrolyzing O-glycosyl compounds";GO:0005975 carbohydrate metabolic process;GO:0005975 carbohydrate metabolic process;GO:0012505 endomembrane system;GO:0012505 endomembrane sy…
Pp1s220_26V6	196	8	-4.37405										5.91359	0.291648	0	0.118587
Pp1s523_8V6	123	5	-4.37993										3.71108	0.18228	0	1.21552						AT4G24790.2		AAA-type ATPase family protein		GO:0003677 DNA binding;GO:0003677 DNA binding;GO:0003887 DNA-directed DNA polymerase activity;GO:0003887 DNA-directed DNA polymerase activity;GO:0005524 ATP binding;GO:0005524 ATP binding;GO:0006260 DNA replication;GO:0006260 DNA replication;GO:0009360 DNA polymerase III complex;GO:0009360 DNA polymerase III complex
Pp1s215_83V6	153	6	-4.43177										4.61622	0.218736	0.368337	0.207527	PF00254	PTHR10516	KOG0552	5.2.1.8	K01802	AT1G20810.1		FKBP-like peptidyl-prolyl cis-trans isomerase family protein		GO:0000413 protein peptidyl-prolyl isomerization;GO:0003755 peptidyl-prolyl cis-trans isomerase activity;GO:0003755 peptidyl-prolyl cis-trans isomerase activity;GO:0005528 FK506 binding;GO:0005528 FK506 binding;GO:0009543 chloroplast thylakoid lumen;GO:0016020 membrane;GO:0018208 peptidyl-proline modification;GO:0009543 chloroplast thylakoid lumen;GO:0031977 thylakoid lumen;GO:0009507 chloroplast
Pp1s363_2V6	131	5	-4.47084										3.95245	0.18228	1.03804	0.652228	PF03330,PF01357					AT5G56320.1	EXPA14	expansin A14		GO:0005576 extracellular region;GO:0009826 unidimensional cell growth;GO:0009828 plant-type cell wall loosening;GO:0009831 plant-type cell wall modification involved in multidimensional cell growth;GO:0012505 endomembrane system;GO:0009826 unidimensional cell growth;GO:0009828 plant-type cell wall loosening
Pp1s41_281V6	158	6	-4.47816										4.76708	0.218736	0.770159	2.46068	PF05757				K08901	AT4G21280.1	PSBQA	photosystem II subunit QA	Photosynthesis;Metabolic pathways	GO:0005509 calcium ion binding;GO:0005509 calcium ion binding;GO:0009654 oxygen evolving complex;GO:0030095 chloroplast photosystem II;GO:0009543 chloroplast thylakoid lumen;GO:0031977 thylakoid lumen;GO:0009543 chloroplast thylakoid lumen;GO:0009579 thylakoid;GO:0009535 chloroplast thylakoid membrane;GO:0009579 thylakoid;GO:0009507 chloroplast;GO:0009535 chloroplast thylakoid membrane;GO:0009535…
Pp1s71_359V6	159	6	-4.48726										4.79725	0.218736	0.267882	1.98633	PF04535	PTHR11615				AT1G03700.1		Uncharacterised protein family (UPF0497)		GO:0003674 molecular_function;GO:0008150 biological_process;GO:0012505 endomembrane system
Pp1s60_190V6	1719	64	-4.5067										51.8646	2.33319	0.133941	2.34209	PF02179					AT2G46240.1	BAG6	BCL-2-associated athanogene 6		GO:0006915 apoptosis;GO:0042981 regulation of apoptosis;GO:0005515 protein binding;GO:0005516 calmodulin binding;GO:0012502 induction of programmed cell death;GO:0009408 response to heat;GO:0009409 response to cold;GO:0010228 vegetative to reproductive phase transition of meristem;GO:0050832 defense response to fungus;GO:0009408 response to heat;GO:0009644 response to high light intensity;GO:0042…
Pp1s309_32V6	218	8	-4.52753						0	206	36.6789		6.57736	0.291648	0	6.10723
Pp1s298_26V6	992	36	-4.54362						6	345	5.92563		29.93	1.31242	0.200911	10.2281	PF00012	PTHR19375	KOG0100		K03283	AT5G02500.1	HSC70-1	heat shock cognate protein 70-1	Spliceosome;Protein processing in endoplasmic reticulum;Endocytosis	GO:0005524 ATP binding;GO:0005524 ATP binding;GO:0005829 cytosol;GO:0006457 protein folding;GO:0009408 response to heat;GO:0005634 nucleus;GO:0009409 response to cold;GO:0009507 chloroplast;GO:0005730 nucleolus;GO:0009615 response to virus;GO:0022626 cytosolic ribosome;GO:0005515 protein binding;GO:0005515 protein binding;GO:0005618 cell wall;GO:0046686 response to cadmium ion;GO:0005774 vacuolar…
Pp1s375_1V6	112	4	-4.5667										3.37919	0.145824	1.20547	2.54962	PF04488	PTHR12042				AT4G19900.1		alpha 1,4-glycosyltransferase family protein		GO:0005739 mitochondrion;GO:0005795 Golgi stack;GO:0008150 biological_process;GO:0016757 "transferase activity, transferring glycosyl groups"
Pp1s199_72V6	283	10	-4.58207						38	3939	6.77582		8.5385	0.36456	1.27244	116.778
Pp1s165_124V6	487	17	-4.59966										14.6935	0.619753	0.133941	0.444701	PF00773	PTHR23355				AT1G77680.1		Ribonuclease II/R family protein		GO:0003723 RNA binding;GO:0003723 RNA binding;GO:0004540 ribonuclease activity;GO:0004540 ribonuclease activity;GO:0009507 chloroplast
Pp1s336_22V6	296	10	-4.64687										8.93072	0.36456	1.1385	0.207527						AT4G17600.1	LIL3:1	Chlorophyll A-B binding family protein		GO:0003700 sequence-specific DNA binding transcription factor activity;GO:0006355 "regulation of transcription, DNA-dependent";GO:0009535 chloroplast thylakoid membrane;GO:0009535 chloroplast thylakoid membrane;GO:0009507 chloroplast
Pp1s12_390V6	238	8	-4.65416										7.18078	0.291648	1.10501	0.326114	PF00504	PTHR21649			K08912	AT2G05100.1	LHCB2.1	photosystem II light harvesting complex gene 2.1	Photosynthesis - antenna proteins;Metabolic pathways	GO:0015979 photosynthesis;GO:0016168 chlorophyll binding;GO:0030076 light-harvesting complex;GO:0009941 chloroplast envelope;GO:0009535 chloroplast thylakoid membrane;GO:0009507 chloroplast;GO:0009535 chloroplast thylakoid membrane;GO:0009535 chloroplast thylakoid membrane;GO:0010287 plastoglobule;GO:0016020 membrane;GO:0009507 chloroplast;GO:0009579 thylakoid;GO:0009637 response to blue light;GO…
Pp1s12_215V6	120	4	-4.66623										3.62056	0.145824	0.100456	1.60092	PF00166	PTHR10772	KOG1641			AT5G20720.1	CPN20	chaperonin 20		GO:0009507 chloroplast;GO:0005516 calmodulin binding;GO:0009579 thylakoid;GO:0009579 thylakoid;GO:0009941 chloroplast envelope;GO:0009941 chloroplast envelope;GO:0009941 chloroplast envelope;GO:0009941 chloroplast envelope;GO:0009409 response to cold;GO:0009535 chloroplast thylakoid membrane;GO:0009535 chloroplast thylakoid membrane;GO:0009579 thylakoid;GO:0009579 thylakoid;GO:0009507 chloroplast…
Pp1s2_677V6	396	13	-4.68826						5	625	7.04592		11.9479	0.473928	0.167426	18.5292	PF00916,PF01740	PTHR11814	KOG0236			AT4G08620.1	SULTR1;1	sulphate transporter 1;1		GO:0009507 chloroplast;GO:0015116 sulfate transmembrane transporter activity;GO:0016020 membrane;GO:0016021 integral to membrane;GO:0008272 sulfate transport;GO:0008272 sulfate transport;GO:0080160 selenate transport
Pp1s35_242V6	188	6	-4.72897										5.67222	0.218736	0.569248	0.118587	PF08263,PF00560,PF00059	PTHR23258				AT1G12040.1	LRX1	leucine-rich repeat/extensin 1		GO:0009927 histidine phosphotransfer kinase activity;GO:0000904 cell morphogenesis involved in differentiation;GO:0009505 plant-type cell wall;GO:0009826 unidimensional cell growth;GO:0010054 trichoblast differentiation;GO:0005199 structural constituent of cell wall
Pp1s325_2V6	128	4	-4.75934										3.86193	0.145824	1.43986	0.503994	PF03059,PF08242,PF08241			2.5.1.43	K05953	AT5G56080.1	NAS2	nicotianamine synthase 2		GO:0030410 nicotianamine synthase activity;GO:0030418 nicotianamine biosynthetic process;GO:0010043 response to zinc ion;GO:0071281 cellular response to iron ion;GO:0071369 cellular response to ethylene stimulus;GO:0071732 cellular response to nitric oxide
Pp1s299_74V6	373	11	-4.84294										11.2539	0.401016	0.636219	1.15622						AT5G10625.1				GO:0003674 molecular_function;GO:0003674 molecular_function;GO:0005575 cellular_component;GO:0008150 biological_process
Pp1s34_53V6	102	3	-4.84681										3.07748	0.109368	0.435307	0.978342	PF06644	PTHR13126	KOG3281		K07555	AT2G34050.1				GO:0005739 mitochondrion;GO:0006461 protein complex assembly;GO:0009507 chloroplast
Pp1s266_52V6	276	8	-4.86787										8.3273	0.291648	0	0.0889402	PF00009,PF01926,PF03144	PTHR23115	KOG0464			AT2G45030.1		Translation elongation factor EFG/EF2 protein		GO:0003746 translation elongation factor activity;GO:0003746 translation elongation factor activity;GO:0003924 GTPase activity;GO:0005525 GTP binding;GO:0008135 "translation factor activity, nucleic acid binding";GO:0005739 mitochondrion;GO:0005739 mitochondrion;GO:0046686 response to cadmium ion
Pp1s7_280V6	104	3	-4.87482										3.13782	0.109368	0.803645	1.48234	PF00046,PF02183	PTHR19418	KOG0483		K09338	AT1G69780.1	ATHB13	Homeobox-leucine zipper protein family		GO:0003677 DNA binding;GO:0003700 sequence-specific DNA binding transcription factor activity;GO:0005634 nucleus;GO:0005634 nucleus;GO:0006355 "regulation of transcription, DNA-dependent";GO:0003700 sequence-specific DNA binding transcription factor activity;GO:0043565 sequence-specific DNA binding;GO:0003700 sequence-specific DNA binding transcription factor activity;GO:0009744 response to sucro…
Pp1s35_32V6	243	7	-4.8768										7.33164	0.255192	0.133941	0	PF00141			1.11.1.7	K00430	AT5G17820.1		Peroxidase superfamily protein	Phenylalanine metabolism;Phenylpropanoid biosynthesis;Metabolic pathways;Biosynthesis of secondary metabolites	GO:0004601 peroxidase activity;GO:0004601 peroxidase activity;GO:0006979 response to oxidative stress;GO:0020037 heme binding;GO:0055114 oxidation-reduction process;GO:0005618 cell wall;GO:0009505 plant-type cell wall;GO:0016020 membrane
Pp1s177_55V6	105	3	-4.88863										3.16799	0.109368	0.100456	0.207527	PF00311	PTHR13793:SF2				AT3G14940.1	PPC3	phosphoenolpyruvate carboxylase 3	Pyruvate metabolism;Carbon fixation in photosynthetic organisms;Metabolic pathways	GO:0006099 tricarboxylic acid cycle;GO:0008964 phosphoenolpyruvate carboxylase activity;GO:0008964 phosphoenolpyruvate carboxylase activity;GO:0005829 cytosol
Pp1s13_239V6	141	4	-4.8989										4.25416	0.145824	2.64533	0.207527						AT2G45470.1	FLA8	FASCICLIN-like arabinogalactan protein 8		GO:0031225 anchored to membrane;GO:0031225 anchored to membrane;GO:0046658 anchored to plasma membrane;GO:0005886 plasma membrane;GO:0009505 plant-type cell wall;GO:0005886 plasma membrane;GO:0048046 apoplast
Pp1s8_86V6	1518	42	-4.93498										45.8001	1.53115	1.33941	1.3341	PF00011	PTHR11527	KOG0710		K13993	AT1G53540.1		HSP20-like chaperones superfamily protein	Protein processing in endoplasmic reticulum	GO:0009408 response to heat
Pp1s52_44V6	182	5	-4.94521						46	254	2.54526		5.49119	0.18228	1.54032	7.53027	PF00221		KOG0222	4.3.1.24	K10775	AT3G10340.1	PAL4	phenylalanine ammonia-lyase 4	Phenylalanine metabolism;Nitrogen metabolism;Phenylpropanoid biosynthesis;Metabolic pathways;Biosynthesis of secondary metabolites	GO:0003824 catalytic activity;GO:0005737 cytoplasm;GO:0006559 L-phenylalanine catabolic process;GO:0009058 biosynthetic process;GO:0016841 ammonia-lyase activity
Pp1s139_88V6	440	12	-4.95574										13.2754	0.437472	0.535763	0.148234	PF00234,PF02162					AT3G22600.1		Bifunctional inhibitor/lipid-transfer protein/seed storage 2S albumin superfamily protein		GO:0006869 lipid transport;GO:0006869 lipid transport;GO:0008289 lipid binding;GO:0008289 lipid binding;GO:0031225 anchored to membrane;GO:0031225 anchored to membrane
Pp1s326_44V6	2989	81	-4.96494						82	1428	4.20237		90.1822	2.95294	2.74579	42.3355	PF00724	PTHR22893	KOG0134	1.3.1.42	K05894	AT1G76680.1	OPR1	12-oxophytodienoate reductase 1	alpha-Linolenic acid metabolism;Metabolic pathways	GO:0010150 leaf senescence;GO:0009611 response to wounding;GO:0009695 jasmonic acid biosynthetic process;GO:0006629 lipid metabolic process;GO:0009751 response to salicylic acid stimulus;GO:0046686 response to cadmium ion;GO:0046686 response to cadmium ion;GO:0016629 12-oxophytodienoate reductase activity;GO:0005829 cytosol;GO:0005829 cytosol;GO:0016629 12-oxophytodienoate reductase activity;GO:0…
Pp1s83_69V6	4875	125	-5.04475						38	428	3.57368		147.085	4.557	1.27244	12.6888	PF00403,PF00122,PF00702	PTHR11939	KOG0207			AT1G63440.1	HMA5	heavy metal atpase 5		GO:0015662 "ATPase activity, coupled to transmembrane movement of ions, phosphorylative mechanism";GO:0016020 membrane;GO:0016021 integral to membrane;GO:0010273 detoxification of copper ion;GO:0046688 response to copper ion
Pp1s112_204V6	122	3	-5.10512										3.68091	0.109368	2.81276	0.444701	PF00226	PTHR11821				AT1G80920.1	J8	Chaperone DnaJ-domain superfamily protein		GO:0006457 protein folding;GO:0031072 heat shock protein binding;GO:0051082 unfolded protein binding;GO:0005634 nucleus;GO:0006950 response to stress;GO:0009570 chloroplast stroma
Pp1s372_16V6	212	5	-5.16534										6.39633	0.18228	2.57836	0	PF00231	PTHR11693	KOG1531	3.6.3.14	K02115	AT4G04640.1	ATPC1	ATPase, F1 complex, gamma subunit protein	Oxidative phosphorylation;Photosynthesis;Metabolic pathways	GO:0009579 thylakoid;GO:0009941 chloroplast envelope;GO:0006754 ATP biosynthetic process;GO:0009772 photosynthetic electron transport in photosystem II;GO:0009535 chloroplast thylakoid membrane;GO:0009579 thylakoid;GO:0009507 chloroplast;GO:0009535 chloroplast thylakoid membrane;GO:0009535 chloroplast thylakoid membrane;GO:0009579 thylakoid;GO:0016020 membrane;GO:0009507 chloroplast;GO:0009544 ch…
Pp1s42_240V6	438	10	-5.2122										13.2151	0.36456	1.17198	2.07527	PF00782	PTHR10159	KOG1716			AT3G55270.1	MKP1	mitogen-activated protein kinase phosphatase 1		GO:0006470 protein dephosphorylation;GO:0008138 protein tyrosine/serine/threonine phosphatase activity;GO:0017017 MAP kinase tyrosine/serine/threonine phosphatase activity;GO:0010225 response to UV-C;GO:0009651 response to salt stress;GO:0017017 MAP kinase tyrosine/serine/threonine phosphatase activity;GO:0005829 cytosol
Pp1s351_7V6	136	3	-5.26184										4.10331	0.109368	0	0	PF04825,PF04824	PTHR12585				AT5G05490.2	SYN1	Rad21/Rec8-like family protein		GO:0003674 molecular_function;GO:0007062 sister chromatid cohesion;GO:0010032 meiotic chromosome condensation;GO:0008278 cohesin complex;GO:0005694 chromosome;GO:0006325 chromatin organization;GO:0051455 attachment of spindle microtubules to kinetochore involved in homologous chromosome segregation;GO:0051754 "meiotic sister chromatid cohesion, centromeric";GO:0007062 sister chromatid cohesion
Pp1s345_10V6	149	3	-5.39355										4.49553	0.109368	0.9041	0.385407	PF03951,PF00120	PTHR20852	KOG0683	6.3.1.2	K01915	AT5G16570.1	GLN1;4	glutamine synthetase 1;4	Alanine, aspartate and glutamate metabolism;Arginine and proline metabolism;Nitrogen metabolism;Metabolic pathways	GO:0004356 glutamate-ammonia ligase activity;GO:0004356 glutamate-ammonia ligase activity;GO:0005829 cytosol;GO:0042128 nitrate assimilation
Pp1s326_48V6	106	2	-5.48726										3.19816	0.0729121	0.200911	2.34209	PF01458					AT4G04770.1	ABC1	ATP binding cassette protein 1		GO:0005215 transporter activity;GO:0009507 chloroplast;GO:0042626 "ATPase activity, coupled to transmembrane movement of substances";GO:2000030 regulation of response to red or far red light;GO:0005215 transporter activity;GO:0005515 protein binding;GO:0006879 cellular iron ion homeostasis;GO:0006879 cellular iron ion homeostasis;GO:0009507 chloroplast;GO:0016226 iron-sulfur cluster assembly;GO:0…
Pp1s389_55V6	273	5	-5.53017										8.23678	0.18228	0.133941	0						AT4G28030.1		Acyl-CoA N-acyltransferases (NAT) superfamily protein		GO:0008080 N-acetyltransferase activity;GO:0008080 N-acetyltransferase activity;GO:0008152 metabolic process;GO:0008152 metabolic process;GO:0009507 chloroplast;GO:0009507 chloroplast
Pp1s99_139V6	343	6	-5.59645										10.3488	0.218736	1.40638	3.55761	PF02359,PF02933,PF07728,PF00004	PTHR23077	KOG0730		K13525	AT5G03340.1		ATPase, AAA-type, CDC48 protein	Protein processing in endoplasmic reticulum	GO:0016887 ATPase activity;GO:0005618 cell wall;GO:0005515 protein binding;GO:0005829 cytosol
Pp1s12_68V6	119	2	-5.65416										3.59039	0.0729121	0	0	PF00477					AT2G40170.1	GEA6	Stress induced protein		GO:0003674 molecular_function;GO:0005575 cellular_component;GO:0048316 seed development;GO:0048700 acquisition of desiccation tolerance;GO:0009737 response to abscisic acid stimulus
Pp1s107_77V6	439	7	-5.73007										13.2452	0.255192	0	0.207527	PF02179					AT2G46240.1	BAG6	BCL-2-associated athanogene 6		GO:0006915 apoptosis;GO:0042981 regulation of apoptosis;GO:0005515 protein binding;GO:0005516 calmodulin binding;GO:0012502 induction of programmed cell death;GO:0009408 response to heat;GO:0009409 response to cold;GO:0010228 vegetative to reproductive phase transition of meristem;GO:0050832 defense response to fungus;GO:0009408 response to heat;GO:0009644 response to high light intensity;GO:0042…
Pp1s152_93V6	133	2	-5.81463										4.01279	0.0729121	1.40638	1.74916	PF00646,PF01167	PTHR16517	KOG2502			AT2G47900.3	TLP3	tubby like protein 3		GO:0003700 sequence-specific DNA binding transcription factor activity;GO:0005575 cellular_component;GO:0008081 phosphoric diester hydrolase activity;GO:0003700 sequence-specific DNA binding transcription factor activity;GO:0006355 "regulation of transcription, DNA-dependent"
Pp1s4_21V6	947	14	-5.83921						16	1933	6.99676		28.5723	0.510385	0.535763	57.3071		PTHR11926	KOG1192			AT1G22400.1	UGT85A1	UDP-Glycosyltransferase superfamily protein	Zeatin biosynthesis	GO:0005575 cellular_component;GO:0008152 metabolic process;GO:0008194 UDP-glycosyltransferase activity;GO:0016757 "transferase activity, transferring glycosyl groups";GO:0016758 "transferase activity, transferring hexosyl groups";GO:0050403 trans-zeatin O-beta-D-glucosyltransferase activity;GO:0050502 cis-zeatin O-beta-D-glucosyltransferase activity;GO:0015020 glucuronosyltransferase activity
Pp1s342_36V6	138	2	-5.86787										4.16365	0.0729121	0	0.415054	PF01388,PF00249	PTHR15348:SF4				AT4G11400.1		ARID/BRIGHT DNA-binding domain;ELM2 domain protein		GO:0003677 DNA binding;GO:0003677 DNA binding;GO:0005773 vacuole
Pp1s10_84V6	141	2	-5.8989										4.25416	0.0729121	2.98018	0.0592934	PF02574	PTHR21091	KOG1579	2.1.1.10	K00547	AT3G63250.1	HMT2	homocysteine methyltransferase 2	Cysteine and methionine metabolism;Metabolic pathways;Biosynthesis of secondary metabolites	GO:0008898 homocysteine S-methyltransferase activity;GO:0012505 endomembrane system;GO:0008898 homocysteine S-methyltransferase activity;GO:0009086 methionine biosynthetic process;GO:0033528 S-methylmethionine cycle
Pp1s326_28V6	244	3	-6.10512										7.36181	0.109368	0.133941	0.207527	PF03005					AT1G01430.1	TBL25	TRICHOME BIREFRINGENCE-LIKE 25		GO:0005575 cellular_component;GO:0008150 biological_process
Pp1s405_20V6	686	8	-6.18141										20.6976	0.291648	2.34396	0.266821
Pp1s8_132V6	182	2	-6.26714										5.49119	0.0729121	0.0669704	0.889402
Pp1s366_10V6	185	2	-6.29073										5.5817	0.0729121	2.74579	0	PF00067	PTHR19383	KOG0156	1.14.13.-	K09754	AT2G40890.1	CYP98A3	cytochrome P450, family 98, subfamily A, polypeptide 3	Phenylalanine metabolism;Phenylpropanoid biosynthesis;Flavonoid biosynthesis;Stilbenoid, diarylheptanoid and gingerol biosynthesis;Metabolic pathways;Biosynthesis of secondary metabolites	GO:0004497 monooxygenase activity;GO:0005792 microsome;GO:0009699 phenylpropanoid biosynthetic process;GO:0046409 p-coumarate 3-hydroxylase activity;GO:0009809 lignin biosynthetic process;GO:0005739 mitochondrion;GO:0009699 phenylpropanoid biosynthetic process;GO:0009809 lignin biosynthetic process;GO:0009813 flavonoid biosynthetic process;GO:0046409 p-coumarate 3-hydroxylase activity;GO:0009805 …
Pp1s212_107V6	1726	13	-6.81212										52.0758	0.473928	0.0669704	0.800462	PF06426,PF00132	PTHR23416:SF6	KOG4750			AT5G56760.1	SERAT1;1	serine acetyltransferase 1;1	Cysteine and methionine metabolism;Sulfur metabolism;Metabolic pathways	GO:0006535 cysteine biosynthetic process from serine;GO:0005829 cytosol;GO:0009001 serine O-acetyltransferase activity;GO:0005829 cytosol
[truncated: 2,606 more rows]
