# Supplementary material for: Transcriptome of Protoplasts Reprogrammed into Stem Cells in Physcomitrella patens
Source: PLoS One. 2012 Apr 24;7(4):e35961. doi: 10.1371/journal.pone.0035961 (PMC3335808; doi:10.1371/journal.pone.0035961)
Supplement: Table S4 — Significantly enriched GO terms of differentially expressed genes. (XLS) [file pone.0035961.s009.xls]

## Sheet: 24h vs 0h
Go_Terms		Enrichment_factor	Allgenes_with_Go_annotation	DEGs_with_Go_annotation	ATH.Homologs	P.value	Q.value	Name	Name=logFC	Go_class	Links
biological process	GO:0009651 response to salt stress	2.8361	377	29	AT1G10170;AT1G24180;AT1G32230;AT1G53580;AT1G54100;AT1G66200;AT2G26650;AT2G37770;AT2G46830;AT2G47770;AT3G01470;AT3G02360;AT3G07370;AT3G09350;AT3G23600;AT3G23830;AT3G48330;AT3G55270;AT3G55730;AT4G01070;AT4G08500;AT4G39260;AT5G01410;AT5G04590;AT5G09650;AT5G17310;AT5G17920;AT5G35630;AT5G47390	5.87007e-07	3.4958e-06	Pp1s215_60V6;Pp1s169_138V6;Pp1s341_28V6;Pp1s29_142V6;Pp1s237_29V6;Pp1s241_33V6;Pp1s2_170V6;Pp1s141_128V6;Pp1s96_165V6;Pp1s293_29V6;Pp1s65_42V6;Pp1s450_31V6;Pp1s245_25V6;Pp1s81_237V6;Pp1s58_193V6;Pp1s112_25V6;Pp1s31_85V6;Pp1s42_240V6;Pp1s72_143V6;Pp1s232_57V6;Pp1s31_252V6;Pp1s42_251V6;Pp1s240_28V6;Pp1s47_171V6;Pp1s113_38V6;Pp1s39_82V6;Pp1s33_110V6;Pp1s40_17V6;Pp1s188_107V6	Pp1s215_60V6=-3.024217803;Pp1s169_138V6=6.022015316;Pp1s341_28V6=-2.345150333;Pp1s29_142V6=2.866840766;Pp1s237_29V6=2.331763916;Pp1s241_33V6=-4.005752485;Pp1s2_170V6=2.080875158;Pp1s141_128V6=38.43113979;Pp1s96_165V6=-35.66266559;Pp1s293_29V6=2.976796564;Pp1s65_42V6=-3.046225545;Pp1s450_31V6=-3.192680046;Pp1s245_25V6=-3.577176454;Pp1s81_237V6=-2.491904813;Pp1s58_193V6=2.720648543;Pp1s112_25V6=-2.…	biological_process	http://amigo.geneontology.org/cgi-bin/amigo/term_details?term=GO:0009651
	GO:0006457 protein folding	2.862	219	17	AT1G74070;AT1G79930;AT1G80920;AT2G20560;AT2G21130;AT2G26890;AT2G30695;AT3G01480;AT3G15520;AT3G60210;AT5G02500;AT5G12030;AT5G22060;AT5G42020;AT5G49910;AT5G55220;AT5G56000	0.000109707	0.000479969	Pp1s4_490V6;Pp1s40_190V6;Pp1s159_108V6;Pp1s199_35V6;Pp1s249_62V6;Pp1s60_221V6;Pp1s34_178V6;Pp1s90_50V6;Pp1s204_121V6;Pp1s343_50V6;Pp1s526_2V6;Pp1s11_289V6;Pp1s174_37V6;Pp1s181_3V6;Pp1s6_146V6;Pp1s61_255V6;Pp1s220_83V6	Pp1s4_490V6=-2.45393139;Pp1s40_190V6=-3.418084825;Pp1s159_108V6=-2.809131776;Pp1s199_35V6=-2.328710043;Pp1s249_62V6=3.649461148;Pp1s60_221V6=-2.508282633;Pp1s34_178V6=-3.288124063;Pp1s90_50V6=-5.678207635;Pp1s204_121V6=-3.476757194;Pp1s343_50V6=-2.357363051;Pp1s526_2V6=-2.472062446;Pp1s11_289V6=-2.693891336;Pp1s174_37V6=-2.47782126;Pp1s181_3V6=-2.888268937;Pp1s6_146V6=-3.109841645;Pp1s61_255V6=-2…	biological_process	http://amigo.geneontology.org/cgi-bin/amigo/term_details?term=GO:0006457
	GO:0006412 translation	3.29334	459	41	AT1G07320;AT1G29070;AT1G32990;AT1G33140;AT1G54290;AT1G74050;AT1G74970;AT1G75350;AT1G78630;AT1G79850;AT2G24090;AT2G33450;AT2G33800;AT2G38140;AT2G43030;AT2G43460;AT3G04400;AT3G05560;AT3G13120;AT3G13580;AT3G25920;AT3G27160;AT3G27830;AT3G27850;AT3G44890;AT3G58140;AT3G59540;AT3G63490;AT4G16720;AT4G18100;AT4G25740;AT4G27090;AT5G03850;AT5G11750;AT5G13510;AT5G14320;AT5G18380;AT5G40950;AT5G54600;AT5G54760…	3.15661e-11	3.73209e-10	Pp1s134_66V6;Pp1s27_326V6;Pp1s141_43V6;Pp1s183_107V6;Pp1s4_134V6;Pp1s30_44V6;Pp1s128_49V6;Pp1s1_221V6;Pp1s152_173V6;Pp1s11_275V6;Pp1s324_20V6;Pp1s229_21V6;Pp1s61_236V6;Pp1s258_80V6;Pp1s117_86V6;Pp1s288_10V6;Pp1s73_232V6;Pp1s283_20V6;Pp1s101_174V6;Pp1s7_369V6;Pp1s212_78V6;Pp1s32_202V6;Pp1s215_82V6;Pp1s60_169V6;Pp1s536_9V6;Pp1s169_50V6;Pp1s227_122V6;Pp1s196_76V6;Pp1s28_15V6;Pp1s249_85V6;Pp1s255_28V…	Pp1s134_66V6=-2.218776016;Pp1s27_326V6=-3.247798918;Pp1s141_43V6=-3.42366469;Pp1s183_107V6=2.117273187;Pp1s4_134V6=-2.740949627;Pp1s30_44V6=2.020965701;Pp1s128_49V6=-2.64244874;Pp1s1_221V6=-2.379496327;Pp1s152_173V6=-2.764145384;Pp1s11_275V6=-4.226044017;Pp1s324_20V6=-4.64342511;Pp1s229_21V6=-3.435805253;Pp1s61_236V6=-3.352299689;Pp1s258_80V6=-2.19646143;Pp1s117_86V6=-3.045867156;Pp1s288_10V6=2.9…	biological_process	http://amigo.geneontology.org/cgi-bin/amigo/term_details?term=GO:0006412
	GO:0009409 response to cold	3.98587	259	28	AT1G03680;AT1G20440;AT1G20450;AT1G23740;AT1G24620;AT1G42970;AT1G67090;AT2G03440;AT2G18790;AT2G28900;AT2G33800;AT2G37770;AT2G38905;AT2G39730;AT2G46240;AT2G46830;AT3G01500;AT3G12780;AT3G22840;AT3G54050;AT4G08500;AT4G09650;AT4G39260;AT5G02500;AT5G04590;AT5G20720;AT5G54770;AT5G65940	6.22728e-10	6.7063e-09	Pp1s317_45V6;Pp1s421_9V6;Pp1s442_22V6;Pp1s407_2V6;Pp1s263_45V6;Pp1s86_156V6;Pp1s66_48V6;Pp1s100_119V6;Pp1s81_159V6;Pp1s284_71V6;Pp1s61_236V6;Pp1s141_128V6;Pp1s2_779V6;Pp1s258_44V6;Pp1s60_190V6;Pp1s96_165V6;Pp1s264_55V6;Pp1s201_82V6;Pp1s371_45V6;Pp1s20_373V6;Pp1s31_252V6;Pp1s16_358V6;Pp1s42_251V6;Pp1s526_2V6;Pp1s47_171V6;Pp1s12_215V6;Pp1s94_94V6;Pp1s370_59V6	Pp1s317_45V6=2.792753469;Pp1s421_9V6=8.834980206;Pp1s442_22V6=2.395678521;Pp1s407_2V6=-4.648957002;Pp1s263_45V6=4.147546198;Pp1s86_156V6=-4.797764616;Pp1s66_48V6=-36.11571642;Pp1s100_119V6=-3.07498623;Pp1s81_159V6=2.352163918;Pp1s284_71V6=-4.205600628;Pp1s61_236V6=-3.352299689;Pp1s141_128V6=38.43113979;Pp1s2_779V6=2.674588723;Pp1s258_44V6=-2.828779246;Pp1s60_190V6=-4.506698227;Pp1s96_165V6=-35.66…	biological_process	http://amigo.geneontology.org/cgi-bin/amigo/term_details?term=GO:0009409
	GO:0046686 response to cadmium ion	4.21998	332	38	AT1G07810;AT1G11860;AT1G20630;AT1G42970;AT1G68560;AT1G74910;AT1G76680;AT1G79930;AT2G01140;AT2G17420;AT2G30860;AT2G30870;AT2G33800;AT2G35840;AT2G45030;AT2G46830;AT3G12500;AT3G12780;AT3G16640;AT3G22890;AT3G48000;AT4G08500;AT4G13930;AT4G23100;AT4G37870;AT5G02500;AT5G09650;AT5G14780;AT5G17310;AT5G17330;AT5G17920;AT5G20720;AT5G23120;AT5G35630;AT5G42020;AT5G47390;AT5G49910;AT5G53460	9.00391e-14	1.80078e-12	Pp1s78_99V6;Pp1s91_92V6;Pp1s3_465V6;Pp1s86_156V6;Pp1s119_138V6;Pp1s8_66V6;Pp1s326_44V6;Pp1s40_190V6;Pp1s475_27V6;Pp1s8_297V6;Pp1s66_172V6;Pp1s75_107V6;Pp1s61_236V6;Pp1s58_240V6;Pp1s266_52V6;Pp1s96_165V6;Pp1s309_77V6;Pp1s201_82V6;Pp1s27_74V6;Pp1s331_37V6;Pp1s496_1V6;Pp1s31_252V6;Pp1s291_35V6;Pp1s479_14V6;Pp1s1_815V6;Pp1s526_2V6;Pp1s113_38V6;Pp1s106_16V6;Pp1s39_82V6;Pp1s34_308V6;Pp1s33_110V6;Pp1s12…	Pp1s78_99V6=-2.547840292;Pp1s91_92V6=-3.686226468;Pp1s3_465V6=3.251224844;Pp1s86_156V6=-4.797764616;Pp1s119_138V6=-2.403200587;Pp1s8_66V6=-2.019871948;Pp1s326_44V6=-4.964941576;Pp1s40_190V6=-3.418084825;Pp1s475_27V6=-3.471198377;Pp1s8_297V6=-3.025238458;Pp1s66_172V6=-2.146464995;Pp1s75_107V6=-2.193526946;Pp1s61_236V6=-3.352299689;Pp1s58_240V6=-2.151145188;Pp1s266_52V6=-4.867868854;Pp1s96_165V6=-3…	biological_process	http://amigo.geneontology.org/cgi-bin/amigo/term_details?term=GO:0046686
	GO:0042742 defense response to bacterium	4.3711	194	23	AT1G02120;AT1G06680;AT1G10170;AT1G59870;AT2G01830;AT2G22240;AT2G30860;AT2G39730;AT2G43710;AT3G01480;AT3G01500;AT3G16640;AT3G27850;AT3G52960;AT3G55800;AT4G09650;AT4G23100;AT4G32260;AT5G02500;AT5G09650;AT5G14740;AT5G24400;AT5G52640	3.57168e-09	3.33357e-08	Pp1s131_152V6;Pp1s75_141V6;Pp1s215_60V6;Pp1s72_306V6;Pp1s6_398V6;Pp1s55_204V6;Pp1s66_172V6;Pp1s258_44V6;Pp1s157_50V6;Pp1s90_50V6;Pp1s264_55V6;Pp1s27_74V6;Pp1s60_169V6;Pp1s1_230V6;Pp1s429_29V6;Pp1s16_358V6;Pp1s479_14V6;Pp1s186_83V6;Pp1s526_2V6;Pp1s113_38V6;Pp1s43_118V6;Pp1s260_17V6;Pp1s291_62V6	Pp1s131_152V6=-2.043137364;Pp1s75_141V6=-2.749821624;Pp1s215_60V6=-3.024217803;Pp1s72_306V6=-2.06490342;Pp1s6_398V6=-2.781712211;Pp1s55_204V6=-2.064757406;Pp1s66_172V6=-2.146464995;Pp1s258_44V6=-2.828779246;Pp1s157_50V6=2.83311264;Pp1s90_50V6=-5.678207635;Pp1s264_55V6=-5.735649527;Pp1s27_74V6=2.492194369;Pp1s60_169V6=-2.648087647;Pp1s1_230V6=2.250923938;Pp1s429_29V6=-6.664229857;Pp1s16_358V6=-2.7…	biological_process	http://amigo.geneontology.org/cgi-bin/amigo/term_details?term=GO:0042742
	GO:0042254 ribosome biogenesis	4.48844	115	14	AT1G29070;AT1G32990;AT1G75350;AT2G43460;AT3G27160;AT3G44890;AT3G59540;AT4G18100;AT4G27090;AT5G03850;AT5G11750;AT5G13510;AT5G14320;AT5G56940	2.95236e-06	1.53085e-05	Pp1s27_326V6;Pp1s141_43V6;Pp1s1_221V6;Pp1s288_10V6;Pp1s32_202V6;Pp1s536_9V6;Pp1s227_122V6;Pp1s249_85V6;Pp1s83_247V6;Pp1s313_15V6;Pp1s10_389V6;Pp1s200_69V6;Pp1s258_19V6;Pp1s38_249V6	Pp1s27_326V6=-3.247798918;Pp1s141_43V6=-3.42366469;Pp1s1_221V6=-2.379496327;Pp1s288_10V6=2.908759338;Pp1s32_202V6=-2.131577574;Pp1s536_9V6=-3.393550417;Pp1s227_122V6=2.340083205;Pp1s249_85V6=4.035071469;Pp1s83_247V6=2.173595671;Pp1s313_15V6=2.042429492;Pp1s10_389V6=-2.395258086;Pp1s200_69V6=-2.2833779;Pp1s258_19V6=-2.820858787;Pp1s38_249V6=-3.722818522	biological_process	http://amigo.geneontology.org/cgi-bin/amigo/term_details?term=GO:0042254
	GO:0009408 response to heat	4.54187	138	17	AT1G08550;AT1G53540;AT1G74310;AT1G79440;AT1G79930;AT2G03440;AT2G22240;AT2G46240;AT3G09350;AT4G17750;AT4G23100;AT4G27670;AT5G02500;AT5G12030;AT5G42020;AT5G49910;AT5G52640	2.21424e-07	1.54996e-06	Pp1s161_120V6;Pp1s8_86V6;Pp1s300_55V6;Pp1s6_180V6;Pp1s40_190V6;Pp1s100_119V6;Pp1s55_204V6;Pp1s60_190V6;Pp1s81_237V6;Pp1s31_388V6;Pp1s479_14V6;Pp1s97_106V6;Pp1s526_2V6;Pp1s11_289V6;Pp1s181_3V6;Pp1s6_146V6;Pp1s291_62V6	Pp1s161_120V6=-2.617325393;Pp1s8_86V6=-4.93498305;Pp1s300_55V6=-2.413348543;Pp1s6_180V6=2.160485254;Pp1s40_190V6=-3.418084825;Pp1s100_119V6=-3.07498623;Pp1s55_204V6=-2.064757406;Pp1s60_190V6=-4.506698227;Pp1s81_237V6=-2.491904813;Pp1s31_388V6=-2.7201738;Pp1s479_14V6=-3.386712465;Pp1s97_106V6=-3.228307778;Pp1s526_2V6=-2.472062446;Pp1s11_289V6=-2.693891336;Pp1s181_3V6=-2.888268937;Pp1s6_146V6=-3.10…	biological_process	http://amigo.geneontology.org/cgi-bin/amigo/term_details?term=GO:0009408
	GO:0006096 glycolysis	5.73522	45	7	AT1G12900;AT1G22170;AT1G42970;AT1G79550;AT2G22480;AT3G12780;AT5G08570	0.000194522	0.000689443	Pp1s135_29V6;Pp1s23_285V6;Pp1s86_156V6;Pp1s145_142V6;Pp1s114_31V6;Pp1s201_82V6;Pp1s124_70V6	Pp1s135_29V6=-5.034434242;Pp1s23_285V6=-2.430961281;Pp1s86_156V6=-4.797764616;Pp1s145_142V6=-3.330886383;Pp1s114_31V6=-2.37825423;Pp1s201_82V6=-8.791390125;Pp1s124_70V6=-2.496309992	biological_process	http://amigo.geneontology.org/cgi-bin/amigo/term_details?term=GO:0006096
	GO:0009644 response to high light intensity	7.90056	42	9	AT1G01470;AT1G17420;AT1G74310;AT2G22240;AT2G46240;AT4G27670;AT5G04410;AT5G12030;AT5G61510	1.51849e-06	8.50356e-06	Pp1s324_46V6;Pp1s419_10V6;Pp1s300_55V6;Pp1s55_204V6;Pp1s60_190V6;Pp1s97_106V6;Pp1s8_36V6;Pp1s11_289V6;Pp1s51_160V6	Pp1s324_46V6=4.359731462;Pp1s419_10V6=2.048010524;Pp1s300_55V6=-2.413348543;Pp1s55_204V6=-2.064757406;Pp1s60_190V6=-4.506698227;Pp1s97_106V6=-3.228307778;Pp1s8_36V6=-2.097768812;Pp1s11_289V6=-2.693891336;Pp1s51_160V6=3.803180714	biological_process	http://amigo.geneontology.org/cgi-bin/amigo/term_details?term=GO:0009644
	GO:0015995 chlorophyll biosynthetic process	7.90056	28	6	AT1G08520;AT1G78600;AT3G03710;AT3G51820;AT4G25080;AT5G54190	8.83575e-05	0.000399034	Pp1s66_287V6;Pp1s235_24V6;Pp1s307_19V6;Pp1s5_30V6;Pp1s372_25V6;Pp1s146_112V6	Pp1s66_287V6=-2.913921435;Pp1s235_24V6=-2.167429136;Pp1s307_19V6=-2.058002713;Pp1s5_30V6=-2.066772923;Pp1s372_25V6=-3.199916989;Pp1s146_112V6=-2.249914528	biological_process	http://amigo.geneontology.org/cgi-bin/amigo/term_details?term=GO:0015995
	GO:0015979 photosynthesis	9.43168	86	22	AT1G03130;AT1G15820;AT1G30380;AT1G31330;AT1G45474;AT1G55670;AT1G61800;AT1G67740;AT1G79040;AT2G05070;AT2G05100;AT2G06520;AT2G18790;AT2G20260;AT3G54050;AT3G54890;AT3G55330;AT3G61470;AT4G09650;AT4G10340;AT4G12800;AT5G54270	1.11022e-15	2.59052e-14	Pp1s107_188V6;Pp1s28_319V6;Pp1s74_135V6;Pp1s80_23V6;Pp1s284_6V6;Pp1s83_246V6;Pp1s1_315V6;Pp1s221_76V6;Pp1s41_264V6;Pp1s99_95V6;Pp1s182_81V6;Pp1s31_66V6;Pp1s81_159V6;Pp1s101_2V6;Pp1s20_373V6;Pp1s161_32V6;Pp1s30_39V6;Pp1s651_2V6;Pp1s16_358V6;Pp1s6_313V6;Pp1s41_267V6;Pp1s254_3V6	Pp1s107_188V6=-3.965795275;Pp1s28_319V6=-2.827089004;Pp1s74_135V6=-3.883769851;Pp1s80_23V6=-4.077420167;Pp1s284_6V6=-3.165336757;Pp1s83_246V6=-2.475551432;Pp1s1_315V6=-3.601604935;Pp1s221_76V6=-3.350620672;Pp1s41_264V6=-5.666234993;Pp1s99_95V6=-2.300950529;Pp1s182_81V6=-3.048851015;Pp1s31_66V6=-4.295397298;Pp1s81_159V6=2.352163918;Pp1s101_2V6=-2.653257139;Pp1s20_373V6=-3.282906354;Pp1s161_32V6=-2…	biological_process	http://amigo.geneontology.org/cgi-bin/amigo/term_details?term=GO:0015979
	GO:0009637 response to blue light	9.70245	38	10	AT1G08540;AT1G67090;AT2G05100;AT2G21150;AT3G01470;AT3G54890;AT4G10340;AT4G40060;AT5G38410;AT5G58140	4.84482e-08	3.56987e-07	Pp1s34_387V6;Pp1s66_48V6;Pp1s182_81V6;Pp1s98_15V6;Pp1s65_42V6;Pp1s161_32V6;Pp1s6_313V6;Pp1s65_52V6;Pp1s545_4V6;Pp1s179_27V6	Pp1s34_387V6=-2.329433622;Pp1s66_48V6=-36.11571642;Pp1s182_81V6=-3.048851015;Pp1s98_15V6=-2.092543605;Pp1s65_42V6=-3.046225545;Pp1s161_32V6=-2.953722443;Pp1s6_313V6=-3.055322902;Pp1s65_52V6=-3.472062446;Pp1s545_4V6=-3.37825423;Pp1s179_27V6=-2.318771806	biological_process	http://amigo.geneontology.org/cgi-bin/amigo/term_details?term=GO:0009637
	GO:0010206 photosystem II repair	18.4346	8	4	AT1G03600;AT1G54780;AT3G27925;AT4G18370	3.44696e-05	0.000169324	Pp1s131_184V6;Pp1s42_208V6;Pp1s79_92V6;Pp1s63_95V6	Pp1s131_184V6=-2.936882583;Pp1s42_208V6=-3.473589915;Pp1s79_92V6=-2.484875097;Pp1s63_95V6=-2.494410459	biological_process	http://amigo.geneontology.org/cgi-bin/amigo/term_details?term=GO:0010206
	GO:0009768 photosynthesis, light harvesting in photosystem I	22.1216	5	3	AT1G45474;AT3G54890;AT3G61470	0.000190839	0.000689443	Pp1s284_6V6;Pp1s161_32V6;Pp1s651_2V6	Pp1s284_6V6=-3.165336757;Pp1s161_32V6=-2.953722443;Pp1s651_2V6=-2.614396062	biological_process	http://amigo.geneontology.org/cgi-bin/amigo/term_details?term=GO:0009768
cellular component	GO:0005774 vacuolar membrane	2.93573	427	34	AT1G07810;AT1G08480;AT1G27480;AT1G30360;AT1G30630;AT1G59870;AT1G61800;AT1G70770;AT1G79550;AT2G01770;AT2G01970;AT2G05070;AT2G21160;AT2G26890;AT2G27030;AT2G30490;AT2G34660;AT3G12500;AT3G16640;AT3G50830;AT3G62700;AT4G03560;AT4G16720;AT4G20850;AT4G27090;AT4G29130;AT4G33625;AT5G02240;AT5G02500;AT5G17920;AT5G39040;AT5G42020;AT5G52450;AT5G56000	2.75998e-08	2.27292e-07	Pp1s78_99V6;Pp1s45_250V6;Pp1s30_186V6;Pp1s213_49V6;Pp1s197_32V6;Pp1s72_306V6;Pp1s1_315V6;Pp1s42_185V6;Pp1s145_142V6;Pp1s76_45V6;Pp1s373_13V6;Pp1s99_95V6;Pp1s194_12V6;Pp1s60_221V6;Pp1s56_122V6;Pp1s168_84V6;Pp1s352_50V6;Pp1s309_77V6;Pp1s27_74V6;Pp1s40_23V6;Pp1s122_170V6;Pp1s258_30V6;Pp1s28_15V6;Pp1s2_123V6;Pp1s83_247V6;Pp1s414_10V6;Pp1s142_145V6;Pp1s64_41V6;Pp1s526_2V6;Pp1s33_110V6;Pp1s1_60V6;Pp1s1…	Pp1s78_99V6=-2.547840292;Pp1s45_250V6=2.281682871;Pp1s30_186V6=2.993218052;Pp1s213_49V6=-3.333335781;Pp1s197_32V6=-2.180482096;Pp1s72_306V6=-2.06490342;Pp1s1_315V6=-3.601604935;Pp1s42_185V6=-2.604834449;Pp1s145_142V6=-3.330886383;Pp1s76_45V6=2.608387387;Pp1s373_13V6=-2.01310099;Pp1s99_95V6=-2.300950529;Pp1s194_12V6=2.303352403;Pp1s60_221V6=-2.508282633;Pp1s56_122V6=-4.12391683;Pp1s168_84V6=-2.041…	cellular_component	http://amigo.geneontology.org/cgi-bin/amigo/term_details?term=GO:0005774
	GO:0005840 ribosome	3.77402	254	26	AT1G07320;AT1G29070;AT1G32990;AT1G74050;AT1G75350;AT1G78630;AT2G24090;AT2G33450;AT2G33800;AT2G38140;AT2G43030;AT2G43460;AT3G04400;AT3G05560;AT3G27160;AT3G44890;AT3G59540;AT3G63490;AT4G16720;AT4G18100;AT4G27090;AT5G03850;AT5G11750;AT5G13510;AT5G40950;AT5G56940	8.0406e-09	7.03553e-08	Pp1s134_66V6;Pp1s27_326V6;Pp1s141_43V6;Pp1s30_44V6;Pp1s1_221V6;Pp1s152_173V6;Pp1s324_20V6;Pp1s229_21V6;Pp1s61_236V6;Pp1s258_80V6;Pp1s117_86V6;Pp1s288_10V6;Pp1s73_232V6;Pp1s283_20V6;Pp1s32_202V6;Pp1s536_9V6;Pp1s227_122V6;Pp1s196_76V6;Pp1s28_15V6;Pp1s249_85V6;Pp1s83_247V6;Pp1s313_15V6;Pp1s10_389V6;Pp1s200_69V6;Pp1s19_202V6;Pp1s38_249V6	Pp1s134_66V6=-2.218776016;Pp1s27_326V6=-3.247798918;Pp1s141_43V6=-3.42366469;Pp1s30_44V6=2.020965701;Pp1s1_221V6=-2.379496327;Pp1s152_173V6=-2.764145384;Pp1s324_20V6=-4.64342511;Pp1s229_21V6=-3.435805253;Pp1s61_236V6=-3.352299689;Pp1s258_80V6=-2.19646143;Pp1s117_86V6=-3.045867156;Pp1s288_10V6=2.908759338;Pp1s73_232V6=2.74163971;Pp1s283_20V6=4.299549291;Pp1s32_202V6=-2.131577574;Pp1s536_9V6=-3.393…	cellular_component	http://amigo.geneontology.org/cgi-bin/amigo/term_details?term=GO:0005840
	GO:0022626 cytosolic ribosome	3.82065	193	20	AT1G03090;AT1G07320;AT1G11860;AT1G20630;AT1G32990;AT1G66200;AT1G67090;AT2G43460;AT3G05560;AT3G13580;AT3G25860;AT4G16720;AT4G18100;AT4G20850;AT4G25740;AT4G27090;AT5G02500;AT5G13510;AT5G35630;AT5G38410	3.44098e-07	2.29399e-06	Pp1s19_262V6;Pp1s134_66V6;Pp1s91_92V6;Pp1s3_465V6;Pp1s141_43V6;Pp1s241_33V6;Pp1s66_48V6;Pp1s288_10V6;Pp1s283_20V6;Pp1s7_369V6;Pp1s351_30V6;Pp1s28_15V6;Pp1s249_85V6;Pp1s2_123V6;Pp1s255_28V6;Pp1s83_247V6;Pp1s526_2V6;Pp1s200_69V6;Pp1s40_17V6;Pp1s545_4V6	Pp1s19_262V6=2.852686346;Pp1s134_66V6=-2.218776016;Pp1s91_92V6=-3.686226468;Pp1s3_465V6=3.251224844;Pp1s141_43V6=-3.42366469;Pp1s241_33V6=-4.005752485;Pp1s66_48V6=-36.11571642;Pp1s288_10V6=2.908759338;Pp1s283_20V6=4.299549291;Pp1s7_369V6=2.75679607;Pp1s351_30V6=-3.241406991;Pp1s28_15V6=2.517495808;Pp1s249_85V6=4.035071469;Pp1s2_123V6=-3.654162161;Pp1s255_28V6=3.376432381;Pp1s83_247V6=2.173595671;…	cellular_component	http://amigo.geneontology.org/cgi-bin/amigo/term_details?term=GO:0022626
	GO:0005777 peroxisome	4.09659	162	18	AT1G06290;AT1G16730;AT1G20630;AT1G47750;AT1G49670;AT1G55320;AT1G60550;AT1G70580;AT1G74910;AT2G13360;AT2G22780;AT3G02360;AT3G48140;AT4G05530;AT4G39260;AT5G17920;AT5G20810;AT5G24400	4.70144e-07	2.99182e-06	Pp1s37_122V6;Pp1s7_339V6;Pp1s3_465V6;Pp1s84_298V6;Pp1s115_21V6;Pp1s169_58V6;Pp1s174_47V6;Pp1s64_220V6;Pp1s8_66V6;Pp1s19_25V6;Pp1s38_300V6;Pp1s450_31V6;Pp1s25_135V6;Pp1s33_197V6;Pp1s42_251V6;Pp1s33_110V6;Pp1s57_85V6;Pp1s260_17V6	Pp1s37_122V6=2.001114899;Pp1s7_339V6=2.983880187;Pp1s3_465V6=3.251224844;Pp1s84_298V6=2.045583787;Pp1s115_21V6=-3.93726219;Pp1s169_58V6=-2.543615707;Pp1s174_47V6=-36.00958806;Pp1s64_220V6=-2.164098924;Pp1s8_66V6=-2.019871948;Pp1s19_25V6=-2.630507289;Pp1s38_300V6=-2.846807239;Pp1s450_31V6=-3.192680046;Pp1s25_135V6=3.398545539;Pp1s33_197V6=-2.496309992;Pp1s42_251V6=2.01207805;Pp1s33_110V6=-2.327123…	cellular_component	http://amigo.geneontology.org/cgi-bin/amigo/term_details?term=GO:0005777
	GO:0048046 apoplast	4.97622	326	44	AT1G02335;AT1G03680;AT1G06680;AT1G11860;AT1G12900;AT1G23740;AT1G26560;AT1G29660;AT1G42970;AT1G47128;AT1G47710;AT1G66200;AT1G66970;AT1G67090;AT1G68560;AT1G79550;AT2G13360;AT2G15620;AT2G21170;AT2G30860;AT2G30870;AT2G39730;AT2G45470;AT3G01500;AT3G12780;AT3G16640;AT3G23600;AT3G54050;AT3G55800;AT3G63140;AT4G03210;AT5G02240;AT5G02500;AT5G04590;AT5G05390;AT5G14740;AT5G17920;AT5G20720;AT5G35630;AT5G38410…	0	0	Pp1s97_59V6;Pp1s317_45V6;Pp1s75_141V6;Pp1s91_92V6;Pp1s135_29V6;Pp1s407_2V6;Pp1s114_133V6;Pp1s28_238V6;Pp1s86_156V6;Pp1s369_30V6;Pp1s86_63V6;Pp1s241_33V6;Pp1s22_253V6;Pp1s66_48V6;Pp1s119_138V6;Pp1s145_142V6;Pp1s19_25V6;Pp1s197_146V6;Pp1s38_15V6;Pp1s66_172V6;Pp1s75_107V6;Pp1s258_44V6;Pp1s13_239V6;Pp1s264_55V6;Pp1s201_82V6;Pp1s27_74V6;Pp1s58_193V6;Pp1s20_373V6;Pp1s429_29V6;Pp1s55_140V6;Pp1s81_246V6;…	Pp1s97_59V6=-3.11499311;Pp1s317_45V6=2.792753469;Pp1s75_141V6=-2.749821624;Pp1s91_92V6=-3.686226468;Pp1s135_29V6=-5.034434242;Pp1s407_2V6=-4.648957002;Pp1s114_133V6=-2.285171774;Pp1s28_238V6=-3.320059352;Pp1s86_156V6=-4.797764616;Pp1s369_30V6=4.136819791;Pp1s86_63V6=2.349180059;Pp1s241_33V6=-4.005752485;Pp1s22_253V6=-2.386617703;Pp1s66_48V6=-36.11571642;Pp1s119_138V6=-2.403200587;Pp1s145_142V6=-3…	cellular_component	http://amigo.geneontology.org/cgi-bin/amigo/term_details?term=GO:0048046
	GO:0009941 chloroplast envelope	5.76928	409	64	AT1G03130;AT1G06680;AT1G11860;AT1G12900;AT1G15820;AT1G20630;AT1G23740;AT1G29390;AT1G30360;AT1G31330;AT1G32080;AT1G32990;AT1G33140;AT1G42970;AT1G55670;AT1G59870;AT1G66200;AT1G67090;AT1G71500;AT1G74970;AT1G75350;AT1G79850;AT1G80380;AT2G05070;AT2G05100;AT2G21170;AT2G26080;AT2G28900;AT2G34460;AT2G38040;AT2G39730;AT2G40490;AT3G01500;AT3G12780;AT3G16950;AT3G25860;AT3G26060;AT3G54890;AT3G55800;AT3G60590…	0	0	Pp1s107_188V6;Pp1s75_141V6;Pp1s91_92V6;Pp1s135_29V6;Pp1s28_319V6;Pp1s3_465V6;Pp1s407_2V6;Pp1s2_226V6;Pp1s213_49V6;Pp1s80_23V6;Pp1s63_96V6;Pp1s141_43V6;Pp1s183_107V6;Pp1s86_156V6;Pp1s83_246V6;Pp1s72_306V6;Pp1s241_33V6;Pp1s66_48V6;Pp1s270_57V6;Pp1s128_49V6;Pp1s1_221V6;Pp1s11_275V6;Pp1s3_177V6;Pp1s99_95V6;Pp1s182_81V6;Pp1s38_15V6;Pp1s276_86V6;Pp1s284_71V6;Pp1s1_295V6;Pp1s234_46V6;Pp1s258_44V6;Pp1s5_…	Pp1s107_188V6=-3.965795275;Pp1s75_141V6=-2.749821624;Pp1s91_92V6=-3.686226468;Pp1s135_29V6=-5.034434242;Pp1s28_319V6=-2.827089004;Pp1s3_465V6=3.251224844;Pp1s407_2V6=-4.648957002;Pp1s2_226V6=2.32507966;Pp1s213_49V6=-3.333335781;Pp1s80_23V6=-4.077420167;Pp1s63_96V6=-2.620638127;Pp1s141_43V6=-3.42366469;Pp1s183_107V6=2.117273187;Pp1s86_156V6=-4.797764616;Pp1s83_246V6=-2.475551432;Pp1s72_306V6=-2.06…	cellular_component	http://amigo.geneontology.org/cgi-bin/amigo/term_details?term=GO:0009941
	GO:0009535 chloroplast thylakoid membrane	7.53877	313	64	AT1G03130;AT1G03600;AT1G06680;AT1G07320;AT1G15820;AT1G18730;AT1G29390;AT1G30380;AT1G31330;AT1G42970;AT1G44575;AT1G45474;AT1G51400;AT1G54500;AT1G54780;AT1G55670;AT1G67090;AT1G67740;AT1G71500;AT1G79040;AT2G05070;AT2G05100;AT2G06520;AT2G20260;AT2G21160;AT2G26500;AT2G30570;AT2G33800;AT2G34460;AT2G39730;AT3G01480;AT3G01500;AT3G10130;AT3G15520;AT3G24590;AT3G26060;AT3G27830;AT3G27850;AT3G27925;AT3G50820…	3.33067e-16	9.32587e-15	Pp1s107_188V6;Pp1s131_184V6;Pp1s75_141V6;Pp1s134_66V6;Pp1s28_319V6;Pp1s127_94V6;Pp1s2_226V6;Pp1s74_135V6;Pp1s80_23V6;Pp1s86_156V6;Pp1s241_86V6;Pp1s284_6V6;Pp1s259_76V6;Pp1s59_328V6;Pp1s42_208V6;Pp1s83_246V6;Pp1s66_48V6;Pp1s221_76V6;Pp1s270_57V6;Pp1s41_264V6;Pp1s99_95V6;Pp1s182_81V6;Pp1s31_66V6;Pp1s101_2V6;Pp1s194_12V6;Pp1s14_288V6;Pp1s185_110V6;Pp1s61_236V6;Pp1s1_295V6;Pp1s258_44V6;Pp1s90_50V6;Pp…	Pp1s107_188V6=-3.965795275;Pp1s131_184V6=-2.936882583;Pp1s75_141V6=-2.749821624;Pp1s134_66V6=-2.218776016;Pp1s28_319V6=-2.827089004;Pp1s127_94V6=-2.611529101;Pp1s2_226V6=2.32507966;Pp1s74_135V6=-3.883769851;Pp1s80_23V6=-4.077420167;Pp1s86_156V6=-4.797764616;Pp1s241_86V6=-3.325198075;Pp1s284_6V6=-3.165336757;Pp1s259_76V6=-3.523575812;Pp1s59_328V6=-2.781039469;Pp1s42_208V6=-3.473589915;Pp1s83_246V6…	cellular_component	http://amigo.geneontology.org/cgi-bin/amigo/term_details?term=GO:0009535
	GO:0009570 chloroplast stroma	7.81519	401	85	AT1G03680;AT1G06680;AT1G07320;AT1G12900;AT1G23740;AT1G32990;AT1G42970;AT1G53670;AT1G56500;AT1G60950;AT1G67090;AT1G69740;AT1G70580;AT1G74970;AT1G75350;AT1G78390;AT1G78630;AT1G79850;AT1G80380;AT1G80920;AT2G02500;AT2G13360;AT2G15620;AT2G21170;AT2G29630;AT2G30695;AT2G30860;AT2G33800;AT2G38040;AT2G39730;AT2G40490;AT2G43030;AT2G43710;AT2G47400;AT3G01480;AT3G01500;AT3G02520;AT3G03710;AT3G12780;AT3G16950…	0	0	Pp1s317_45V6;Pp1s75_141V6;Pp1s134_66V6;Pp1s135_29V6;Pp1s407_2V6;Pp1s141_43V6;Pp1s86_156V6;Pp1s317_19V6;Pp1s71_244V6;Pp1s65_120V6;Pp1s66_48V6;Pp1s450_21V6;Pp1s64_220V6;Pp1s128_49V6;Pp1s1_221V6;Pp1s412_7V6;Pp1s152_173V6;Pp1s11_275V6;Pp1s3_177V6;Pp1s159_108V6;Pp1s211_107V6;Pp1s19_25V6;Pp1s197_146V6;Pp1s38_15V6;Pp1s88_47V6;Pp1s34_178V6;Pp1s66_172V6;Pp1s61_236V6;Pp1s234_46V6;Pp1s258_44V6;Pp1s5_369V6;P…	Pp1s317_45V6=2.792753469;Pp1s75_141V6=-2.749821624;Pp1s134_66V6=-2.218776016;Pp1s135_29V6=-5.034434242;Pp1s407_2V6=-4.648957002;Pp1s141_43V6=-3.42366469;Pp1s86_156V6=-4.797764616;Pp1s317_19V6=-2.762346886;Pp1s71_244V6=-3.105119234;Pp1s65_120V6=-2.628450331;Pp1s66_48V6=-36.11571642;Pp1s450_21V6=-2.240262016;Pp1s64_220V6=-2.164098924;Pp1s128_49V6=-2.64244874;Pp1s1_221V6=-2.379496327;Pp1s412_7V6=-2.…	cellular_component	http://amigo.geneontology.org/cgi-bin/amigo/term_details?term=GO:0009570
	GO:0009543 chloroplast thylakoid lumen	9.34715	71	18	AT1G03600;AT1G06680;AT1G08550;AT1G14590;AT1G20810;AT1G51400;AT1G54780;AT1G74070;AT1G76100;AT3G01480;AT3G15520;AT3G27925;AT3G50820;AT3G55330;AT4G02530;AT4G18370;AT4G21280;AT5G23120	4.23328e-13	6.5851e-12	Pp1s131_184V6;Pp1s75_141V6;Pp1s161_120V6;Pp1s111_58V6;Pp1s215_83V6;Pp1s259_76V6;Pp1s42_208V6;Pp1s4_490V6;Pp1s3_520V6;Pp1s90_50V6;Pp1s204_121V6;Pp1s79_92V6;Pp1s421_3V6;Pp1s30_39V6;Pp1s73_31V6;Pp1s63_95V6;Pp1s41_281V6;Pp1s189_18V6	Pp1s131_184V6=-2.936882583;Pp1s75_141V6=-2.749821624;Pp1s161_120V6=-2.617325393;Pp1s111_58V6=2.637545755;Pp1s215_83V6=-4.43176974;Pp1s259_76V6=-3.523575812;Pp1s42_208V6=-3.473589915;Pp1s4_490V6=-2.45393139;Pp1s3_520V6=-4.27814655;Pp1s90_50V6=-5.678207635;Pp1s204_121V6=-3.476757194;Pp1s79_92V6=-2.484875097;Pp1s421_3V6=-3.469265169;Pp1s30_39V6=-2.587684345;Pp1s73_31V6=-3.968797763;Pp1s63_95V6=-2.49…	cellular_component	http://amigo.geneontology.org/cgi-bin/amigo/term_details?term=GO:0009543
	GO:0010287 plastoglobule	9.90518	67	18	AT1G15820;AT1G31330;AT1G54570;AT2G01140;AT2G05070;AT2G05100;AT2G20260;AT2G34460;AT2G39730;AT2G41040;AT3G10130;AT3G26060;AT3G50820;AT3G54890;AT3G63140;AT4G09650;AT4G10340;AT4G12800	1.41109e-13	2.46941e-12	Pp1s28_319V6;Pp1s80_23V6;Pp1s9_366V6;Pp1s475_27V6;Pp1s99_95V6;Pp1s182_81V6;Pp1s101_2V6;Pp1s1_295V6;Pp1s258_44V6;Pp1s245_12V6;Pp1s156_109V6;Pp1s95_45V6;Pp1s421_3V6;Pp1s161_32V6;Pp1s55_140V6;Pp1s16_358V6;Pp1s6_313V6;Pp1s41_267V6	Pp1s28_319V6=-2.827089004;Pp1s80_23V6=-4.077420167;Pp1s9_366V6=-3.048851015;Pp1s475_27V6=-3.471198377;Pp1s99_95V6=-2.300950529;Pp1s182_81V6=-3.048851015;Pp1s101_2V6=-2.653257139;Pp1s1_295V6=-2.42430622;Pp1s258_44V6=-2.828779246;Pp1s245_12V6=2.252628244;Pp1s156_109V6=2.450108968;Pp1s95_45V6=-2.546799762;Pp1s421_3V6=-3.469265169;Pp1s161_32V6=-2.953722443;Pp1s55_140V6=-3.838295739;Pp1s16_358V6=-2.75…	cellular_component	http://amigo.geneontology.org/cgi-bin/amigo/term_details?term=GO:0010287
	GO:0010319 stromule	9.96467	37	10	AT1G03680;AT1G23740;AT1G42970;AT2G39730;AT3G01500;AT3G12780;AT3G54050;AT4G09650;AT5G04590;AT5G54770	3.65854e-08	2.84553e-07	Pp1s317_45V6;Pp1s407_2V6;Pp1s86_156V6;Pp1s258_44V6;Pp1s264_55V6;Pp1s201_82V6;Pp1s20_373V6;Pp1s16_358V6;Pp1s47_171V6;Pp1s94_94V6	Pp1s317_45V6=2.792753469;Pp1s407_2V6=-4.648957002;Pp1s86_156V6=-4.797764616;Pp1s258_44V6=-2.828779246;Pp1s264_55V6=-5.735649527;Pp1s201_82V6=-8.791390125;Pp1s20_373V6=-3.282906354;Pp1s16_358V6=-2.753112444;Pp1s47_171V6=-3.250704181;Pp1s94_94V6=-4.445844925	cellular_component	http://amigo.geneontology.org/cgi-bin/amigo/term_details?term=GO:0010319
	GO:0031977 thylakoid lumen	10.6354	52	15	AT1G06680;AT1G08550;AT1G20810;AT1G54780;AT1G67090;AT1G76100;AT3G01480;AT3G15520;AT3G27925;AT3G50820;AT3G55330;AT4G02530;AT4G18370;AT4G21280;AT5G23120	4.90452e-12	6.86633e-11	Pp1s75_141V6;Pp1s161_120V6;Pp1s215_83V6;Pp1s42_208V6;Pp1s66_48V6;Pp1s3_520V6;Pp1s90_50V6;Pp1s204_121V6;Pp1s79_92V6;Pp1s421_3V6;Pp1s30_39V6;Pp1s73_31V6;Pp1s63_95V6;Pp1s41_281V6;Pp1s189_18V6	Pp1s75_141V6=-2.749821624;Pp1s161_120V6=-2.617325393;Pp1s215_83V6=-4.43176974;Pp1s42_208V6=-3.473589915;Pp1s66_48V6=-36.11571642;Pp1s3_520V6=-4.27814655;Pp1s90_50V6=-5.678207635;Pp1s204_121V6=-3.476757194;Pp1s79_92V6=-2.484875097;Pp1s421_3V6=-3.469265169;Pp1s30_39V6=-2.587684345;Pp1s73_31V6=-3.968797763;Pp1s63_95V6=-2.494410459;Pp1s41_281V6=-4.478162645;Pp1s189_18V6=-2.044525089	cellular_component	http://amigo.geneontology.org/cgi-bin/amigo/term_details?term=GO:0031977
	GO:0009579 thylakoid	10.7609	209	61	AT1G03130;AT1G03600;AT1G03680;AT1G06680;AT1G07320;AT1G15820;AT1G23740;AT1G30380;AT1G31330;AT1G44575;AT1G54780;AT1G55670;AT1G67090;AT1G76100;AT1G78630;AT1G79040;AT2G05070;AT2G05100;AT2G20260;AT2G21170;AT2G30860;AT2G33800;AT2G39730;AT3G01480;AT3G01500;AT3G12780;AT3G15520;AT3G16640;AT3G27830;AT3G27850;AT3G27925;AT3G50820;AT3G52960;AT3G53460;AT3G54890;AT3G55330;AT3G55800;AT3G61470;AT3G63140;AT4G02530…	0	0	Pp1s107_188V6;Pp1s131_184V6;Pp1s317_45V6;Pp1s75_141V6;Pp1s134_66V6;Pp1s28_319V6;Pp1s407_2V6;Pp1s74_135V6;Pp1s80_23V6;Pp1s241_86V6;Pp1s42_208V6;Pp1s83_246V6;Pp1s66_48V6;Pp1s3_520V6;Pp1s152_173V6;Pp1s41_264V6;Pp1s99_95V6;Pp1s182_81V6;Pp1s101_2V6;Pp1s38_15V6;Pp1s66_172V6;Pp1s61_236V6;Pp1s258_44V6;Pp1s90_50V6;Pp1s264_55V6;Pp1s201_82V6;Pp1s204_121V6;Pp1s27_74V6;Pp1s215_82V6;Pp1s60_169V6;Pp1s79_92V6;Pp…	Pp1s107_188V6=-3.965795275;Pp1s131_184V6=-2.936882583;Pp1s317_45V6=2.792753469;Pp1s75_141V6=-2.749821624;Pp1s134_66V6=-2.218776016;Pp1s28_319V6=-2.827089004;Pp1s407_2V6=-4.648957002;Pp1s74_135V6=-3.883769851;Pp1s80_23V6=-4.077420167;Pp1s241_86V6=-3.325198075;Pp1s42_208V6=-3.473589915;Pp1s83_246V6=-2.475551432;Pp1s66_48V6=-36.11571642;Pp1s3_520V6=-4.27814655;Pp1s152_173V6=-2.764145384;Pp1s41_264V6…	cellular_component	http://amigo.geneontology.org/cgi-bin/amigo/term_details?term=GO:0009579
	GO:0030076 light-harvesting complex	12.9043	20	7	AT1G45474;AT2G05070;AT2G05100;AT3G54890;AT3G61470;AT4G10340;AT5G54270	5.9928e-07	3.4958e-06	Pp1s284_6V6;Pp1s99_95V6;Pp1s182_81V6;Pp1s161_32V6;Pp1s651_2V6;Pp1s6_313V6;Pp1s254_3V6	Pp1s284_6V6=-3.165336757;Pp1s99_95V6=-2.300950529;Pp1s182_81V6=-3.048851015;Pp1s161_32V6=-2.953722443;Pp1s651_2V6=-2.614396062;Pp1s6_313V6=-3.055322902;Pp1s254_3V6=-2.80440412	cellular_component	http://amigo.geneontology.org/cgi-bin/amigo/term_details?term=GO:0030076
	GO:0030095 chloroplast photosystem II	16.5912	20	9	AT1G03600;AT1G06680;AT1G08550;AT1G51400;AT1G67740;AT3G50820;AT3G55330;AT4G21280;AT5G23120	9.76696e-10	9.76696e-09	Pp1s131_184V6;Pp1s75_141V6;Pp1s161_120V6;Pp1s259_76V6;Pp1s221_76V6;Pp1s421_3V6;Pp1s30_39V6;Pp1s41_281V6;Pp1s189_18V6	Pp1s131_184V6=-2.936882583;Pp1s75_141V6=-2.749821624;Pp1s161_120V6=-2.617325393;Pp1s259_76V6=-3.523575812;Pp1s221_76V6=-3.350620672;Pp1s421_3V6=-3.469265169;Pp1s30_39V6=-2.587684345;Pp1s41_281V6=-4.478162645;Pp1s189_18V6=-2.044525089	cellular_component	http://amigo.geneontology.org/cgi-bin/amigo/term_details?term=GO:0030095
molecular function	GO:0003824 catalytic activity	1.7455	1035	49	AT1G02000;AT1G12050;AT1G19440;AT1G22170;AT1G26560;AT1G43710;AT1G49670;AT1G54570;AT1G55320;AT1G56500;AT1G60550;AT1G62640;AT1G64390;AT1G64660;AT1G68410;AT1G69740;AT1G72990;AT1G77670;AT2G13840;AT2G20260;AT2G20340;AT2G22780;AT2G29630;AT2G33700;AT2G34460;AT2G35840;AT3G02360;AT3G10340;AT4G00620;AT4G05530;AT4G13930;AT4G16800;AT4G18370;AT4G21580;AT4G29360;AT4G31140;AT4G33540;AT4G39970;AT5G01260;AT5G02240…	0.00013	0.000535294	Pp1s11_253V6;Pp1s142_144V6;Pp1s34_294V6;Pp1s23_285V6;Pp1s114_133V6;Pp1s47_119V6;Pp1s115_21V6;Pp1s9_366V6;Pp1s169_58V6;Pp1s71_244V6;Pp1s174_47V6;Pp1s119_22V6;Pp1s37_355V6;Pp1s2_113V6;Pp1s29_323V6;Pp1s450_21V6;Pp1s149_266V6;Pp1s63_61V6;Pp1s180_52V6;Pp1s101_2V6;Pp1s102_49V6;Pp1s38_300V6;Pp1s88_47V6;Pp1s84_221V6;Pp1s1_295V6;Pp1s58_240V6;Pp1s450_31V6;Pp1s52_44V6;Pp1s324_49V6;Pp1s33_197V6;Pp1s291_35V6;…	Pp1s11_253V6=-2.524879144;Pp1s142_144V6=-2.311140034;Pp1s34_294V6=-4.105119234;Pp1s23_285V6=-2.430961281;Pp1s114_133V6=-2.285171774;Pp1s47_119V6=-3.358382084;Pp1s115_21V6=-3.93726219;Pp1s9_366V6=-3.048851015;Pp1s169_58V6=-2.543615707;Pp1s71_244V6=-3.105119234;Pp1s174_47V6=-36.00958806;Pp1s119_22V6=-2.836905381;Pp1s37_355V6=-2.759344398;Pp1s2_113V6=3.632973025;Pp1s29_323V6=-2.246414698;Pp1s450_21V…	molecular_function	http://amigo.geneontology.org/cgi-bin/amigo/term_details?term=GO:0003824
	GO:0005507 copper ion binding	2.52529	219	15	AT1G06330;AT1G66200;AT1G67090;AT1G76100;AT1G79440;AT2G30860;AT2G30870;AT2G31050;AT2G32300;AT3G08950;AT4G05390;AT5G04590;AT5G17920;AT5G20720;AT5G21105	0.00100704	0.00238958	Pp1s57_24V6;Pp1s241_33V6;Pp1s66_48V6;Pp1s3_520V6;Pp1s6_180V6;Pp1s66_172V6;Pp1s75_107V6;Pp1s57_155V6;Pp1s227_44V6;Pp1s116_104V6;Pp1s131_154V6;Pp1s47_171V6;Pp1s33_110V6;Pp1s12_215V6;Pp1s308_11V6	Pp1s57_24V6=4.742339708;Pp1s241_33V6=-4.005752485;Pp1s66_48V6=-36.11571642;Pp1s3_520V6=-4.27814655;Pp1s6_180V6=2.160485254;Pp1s66_172V6=-2.146464995;Pp1s75_107V6=-2.193526946;Pp1s57_155V6=-4.160223834;Pp1s227_44V6=-2.540704111;Pp1s116_104V6=2.093814214;Pp1s131_154V6=-3.272547273;Pp1s47_171V6=-3.250704181;Pp1s33_110V6=-2.327123887;Pp1s12_215V6=-4.666234993;Pp1s308_11V6=-3.720516654	molecular_function	http://amigo.geneontology.org/cgi-bin/amigo/term_details?term=GO:0005507
	GO:0005516 calmodulin binding	2.61913	183	13	AT1G10130;AT1G21640;AT2G02010;AT2G22300;AT2G43120;AT2G46240;AT4G02600;AT4G24240;AT4G30560;AT5G17330;AT5G20720;AT5G20810;AT5G53760	0.00153843	0.00331353	Pp1s268_6V6;Pp1s17_312V6;Pp1s8_163V6;Pp1s112_221V6;Pp1s433_10V6;Pp1s60_190V6;Pp1s99_220V6;Pp1s48_141V6;Pp1s68_102V6;Pp1s34_308V6;Pp1s12_215V6;Pp1s57_85V6;Pp1s296_56V6	Pp1s268_6V6=3.057791545;Pp1s17_312V6=-2.248091583;Pp1s8_163V6=6.361671003;Pp1s112_221V6=-2.42230941;Pp1s433_10V6=-3.895405947;Pp1s60_190V6=-4.506698227;Pp1s99_220V6=-2.701858903;Pp1s48_141V6=2.277744921;Pp1s68_102V6=-2.094630875;Pp1s34_308V6=-2.046692261;Pp1s12_215V6=-4.666234993;Pp1s57_85V6=-2.337217474;Pp1s296_56V6=-4.134383829	molecular_function	http://amigo.geneontology.org/cgi-bin/amigo/term_details?term=GO:0005516
	GO:0042626 ATPase activity, coupled to transmembrane movement of substances	3.28538	101	9	AT1G15210;AT1G15520;AT1G31770;AT1G59870;AT2G34660;AT3G28345;AT3G62700;AT4G04770;AT5G39040	0.00172051	0.00359509	Pp1s36_257V6;Pp1s12_29V6;Pp1s270_82V6;Pp1s72_306V6;Pp1s352_50V6;Pp1s338_12V6;Pp1s122_170V6;Pp1s326_48V6;Pp1s1_60V6	Pp1s36_257V6=-3.202790312;Pp1s12_29V6=-3.026666162;Pp1s270_82V6=3.443002081;Pp1s72_306V6=-2.06490342;Pp1s352_50V6=-2.736081567;Pp1s338_12V6=-3.032362892;Pp1s122_170V6=-2.504564093;Pp1s326_48V6=-5.487264852;Pp1s1_60V6=-2.28227262	molecular_function	http://amigo.geneontology.org/cgi-bin/amigo/term_details?term=GO:0042626
	GO:0003735 structural constituent of ribosome	3.48516	402	38	AT1G07320;AT1G29070;AT1G32990;AT1G33140;AT1G74050;AT1G74970;AT1G75350;AT1G78630;AT1G79850;AT2G24090;AT2G33450;AT2G33800;AT2G38140;AT2G43030;AT2G43460;AT3G04400;AT3G05560;AT3G13120;AT3G13580;AT3G25920;AT3G27160;AT3G27830;AT3G27850;AT3G44890;AT3G59540;AT3G63490;AT4G16720;AT4G18100;AT4G25740;AT4G27090;AT5G03850;AT5G11750;AT5G13510;AT5G14320;AT5G18380;AT5G40950;AT5G54600;AT5G56940	3.19893e-11	3.73209e-10	Pp1s134_66V6;Pp1s27_326V6;Pp1s141_43V6;Pp1s183_107V6;Pp1s30_44V6;Pp1s128_49V6;Pp1s1_221V6;Pp1s152_173V6;Pp1s11_275V6;Pp1s324_20V6;Pp1s229_21V6;Pp1s61_236V6;Pp1s258_80V6;Pp1s117_86V6;Pp1s288_10V6;Pp1s73_232V6;Pp1s283_20V6;Pp1s101_174V6;Pp1s7_369V6;Pp1s212_78V6;Pp1s32_202V6;Pp1s215_82V6;Pp1s60_169V6;Pp1s536_9V6;Pp1s227_122V6;Pp1s196_76V6;Pp1s28_15V6;Pp1s249_85V6;Pp1s255_28V6;Pp1s83_247V6;Pp1s313_15…	Pp1s134_66V6=-2.218776016;Pp1s27_326V6=-3.247798918;Pp1s141_43V6=-3.42366469;Pp1s183_107V6=2.117273187;Pp1s30_44V6=2.020965701;Pp1s128_49V6=-2.64244874;Pp1s1_221V6=-2.379496327;Pp1s152_173V6=-2.764145384;Pp1s11_275V6=-4.226044017;Pp1s324_20V6=-4.64342511;Pp1s229_21V6=-3.435805253;Pp1s61_236V6=-3.352299689;Pp1s258_80V6=-2.19646143;Pp1s117_86V6=-3.045867156;Pp1s288_10V6=2.908759338;Pp1s73_232V6=2.7…	molecular_function	http://amigo.geneontology.org/cgi-bin/amigo/term_details?term=GO:0003735
	GO:0016168 chlorophyll binding	9.21732	32	8	AT1G15820;AT1G44575;AT2G05070;AT2G05100;AT3G22840;AT3G54890;AT3G61470;AT4G10340	1.67082e-06	8.99672e-06	Pp1s28_319V6;Pp1s241_86V6;Pp1s99_95V6;Pp1s182_81V6;Pp1s371_45V6;Pp1s161_32V6;Pp1s651_2V6;Pp1s6_313V6	Pp1s28_319V6=-2.827089004;Pp1s241_86V6=-3.325198075;Pp1s99_95V6=-2.300950529;Pp1s182_81V6=-3.048851015;Pp1s371_45V6=36.20550535;Pp1s161_32V6=-2.953722443;Pp1s651_2V6=-2.614396062;Pp1s6_313V6=-3.055322902	molecular_function	http://amigo.geneontology.org/cgi-bin/amigo/term_details?term=GO:0016168
	GO:0008266 poly(U) RNA binding	9.70245	19	5	AT1G06680;AT1G07320;AT3G50820;AT3G53460;AT3G63140	0.000122853	0.000521193	Pp1s75_141V6;Pp1s134_66V6;Pp1s421_3V6;Pp1s91_60V6;Pp1s55_140V6	Pp1s75_141V6=-2.749821624;Pp1s134_66V6=-2.218776016;Pp1s421_3V6=-3.469265169;Pp1s91_60V6=-2.157221346;Pp1s55_140V6=-3.838295739	molecular_function	http://amigo.geneontology.org/cgi-bin/amigo/term_details?term=GO:0008266
	GO:0016209 antioxidant activity	9.83181	15	4	AT1G48130;AT2G37240;AT3G26060;AT3G52960	0.00057747	0.00158184	Pp1s32_349V6;Pp1s53_22V6;Pp1s95_45V6;Pp1s1_230V6	Pp1s32_349V6=2.11512472;Pp1s53_22V6=-4.052943769;Pp1s95_45V6=-2.546799762;Pp1s1_230V6=2.250923938	molecular_function	http://amigo.geneontology.org/cgi-bin/amigo/term_details?term=GO:0016209
	GO:0004028 3-chloroallyl aldehyde dehydrogenase activity	10.5341	14	4	AT1G54100;AT1G79440;AT2G24270;AT3G48000	0.000432737	0.00126215	Pp1s237_29V6;Pp1s6_180V6;Pp1s10_228V6;Pp1s496_1V6	Pp1s237_29V6=2.331763916;Pp1s6_180V6=2.160485254;Pp1s10_228V6=-3.700182325;Pp1s496_1V6=2.362075403	molecular_function	http://amigo.geneontology.org/cgi-bin/amigo/term_details?term=GO:0004028
	GO:0043295 glutathione binding	11.0608	10	3	AT1G75270;AT2G30860;AT2G30870	0.00206837	0.0042584	Pp1s271_8V6;Pp1s66_172V6;Pp1s75_107V6	Pp1s271_8V6=38.28828303;Pp1s66_172V6=-2.146464995;Pp1s75_107V6=-2.193526946	molecular_function	http://amigo.geneontology.org/cgi-bin/amigo/term_details?term=GO:0043295
	GO:0016709 oxidoreductase activity, acting on paired donors, with incorporation or reduction of molecular oxygen, NADH or NADPH as one donor, and incorporation of one atom of oxygen	12.2898	9	3	AT1G01280;AT3G24200;AT4G36380	0.00147756	0.00323216	Pp1s526_10V6;Pp1s6_302V6;Pp1s83_58V6	Pp1s526_10V6=-37.35986936;Pp1s6_302V6=2.287961317;Pp1s83_58V6=4.884511792	molecular_function	http://amigo.geneontology.org/cgi-bin/amigo/term_details?term=GO:0016709
	GO:0004356 glutamate-ammonia ligase activity	15.8011	7	3	AT1G66200;AT5G16570;AT5G35630	0.000641224	0.00160306	Pp1s241_33V6;Pp1s345_10V6;Pp1s40_17V6	Pp1s241_33V6=-4.005752485;Pp1s345_10V6=-5.393550417;Pp1s40_17V6=-3.468188188	molecular_function	http://amigo.geneontology.org/cgi-bin/amigo/term_details?term=GO:0004356
	GO:0003989 acetyl-CoA carboxylase activity	18.4346	6	3	AT1G36160;AT2G38040;AT5G35360	0.000373962	0.00113431	Pp1s13_171V6;Pp1s234_46V6;Pp1s18_23V6	Pp1s13_171V6=-3.777880349;Pp1s234_46V6=-2.821628676;Pp1s18_23V6=-2.277192703	molecular_function	http://amigo.geneontology.org/cgi-bin/amigo/term_details?term=GO:0003989
	GO:0004047 aminomethyltransferase activity	24.5795	3	2	AT1G11860;AT1G60990	0.00216454	0.00432907	Pp1s91_92V6;Pp1s316_69V6	Pp1s91_92V6=-3.686226468;Pp1s316_69V6=-2.428371163	molecular_function	http://amigo.geneontology.org/cgi-bin/amigo/term_details?term=GO:0004047
	GO:0004618 phosphoglycerate kinase activity	24.5795	3	2	AT1G79550;AT3G12780	0.00216454	0.00432907	Pp1s145_142V6;Pp1s201_82V6	Pp1s145_142V6=-3.330886383;Pp1s201_82V6=-8.791390125	molecular_function	http://amigo.geneontology.org/cgi-bin/amigo/term_details?term=GO:0004618

## Sheet: 48h vs 24h
Go_Terms		Enrichment_factor	Allgenes_with_Go_annotation	DEGs_with_Go_annotation	ATH.Homologs	P.value	Q.value	Name	Name=logFC	Go_class	Links
biological process	GO:0009737 response to abscisic acid stimulus	2.21507	317	36	AT1G01060;AT1G05470;AT1G05510;AT1G20440;AT1G20630;AT1G43670;AT1G44170;AT1G54100;AT1G55020;AT1G55870;AT1G59610;AT2G13540;AT2G36530;AT2G46820;AT2G47770;AT3G02850;AT3G24650;AT3G48330;AT3G53180;AT4G01370;AT4G17260;AT4G25000;AT4G30160;AT4G33950;AT4G37040;AT4G39260;AT5G02240;AT5G02310;AT5G11260;AT5G16600;AT5G23720;AT5G35750;AT5G35980;AT5G50600;AT5G60660;AT5G60980	7.37959e-06	5.16571e-05	Pp1s325_68V6;Pp1s54_274V6;Pp1s90_196V6;Pp1s421_9V6;Pp1s3_465V6;Pp1s1_300V6;Pp1s90_226V6;Pp1s237_29V6;Pp1s434_27V6;Pp1s77_97V6;Pp1s38_177V6;Pp1s41_19V6;Pp1s1_527V6;Pp1s54_32V6;Pp1s403_10V6;Pp1s357_24V6;Pp1s143_82V6;Pp1s31_85V6;Pp1s355_39V6;Pp1s99_26V6;Pp1s244_82V6;Pp1s223_59V6;Pp1s105_43V6;Pp1s116_98V6;Pp1s90_139V6;Pp1s42_251V6;Pp1s64_41V6;Pp1s83_4V6;Pp1s80_72V6;Pp1s78_152V6;Pp1s90_103V6;Pp1s355_6…	Pp1s325_68V6=2.205723697;Pp1s54_274V6=-2.762555726;Pp1s90_196V6=-4.65668709;Pp1s421_9V6=-4.126459534;Pp1s3_465V6=-4.39570176;Pp1s1_300V6=-2.228407014;Pp1s90_226V6=-2.707060613;Pp1s237_29V6=-2.627813077;Pp1s434_27V6=2.196131827;Pp1s77_97V6=-3.467594678;Pp1s38_177V6=2.946749051;Pp1s41_19V6=5.519953581;Pp1s1_527V6=2.11209288;Pp1s54_32V6=2.716685616;Pp1s403_10V6=2.254871346;Pp1s357_24V6=-2.722212838;…	biological_process	http://amigo.geneontology.org/cgi-bin/amigo/term_details?term=GO:0009737
	GO:0009651 response to salt stress	2.43164	377	47	AT1G01060;AT1G01140;AT1G17880;AT1G24180;AT1G27760;AT1G32230;AT1G44170;AT1G51980;AT1G53580;AT1G54100;AT1G66200;AT1G73660;AT2G17840;AT2G18250;AT2G20360;AT2G36530;AT2G43090;AT2G47770;AT3G02360;AT3G04120;AT3G10920;AT3G23830;AT3G25780;AT3G48330;AT3G57290;AT3G60750;AT3G61050;AT4G01070;AT4G01370;AT4G11150;AT4G17260;AT4G31300;AT4G33950;AT4G39260;AT5G04590;AT5G09590;AT5G09650;AT5G15650;AT5G17920;AT5G23860…	1.90363e-08	2.02178e-07	Pp1s325_68V6;Pp1s58_13V6;Pp1s359_31V6;Pp1s169_138V6;Pp1s192_88V6;Pp1s341_28V6;Pp1s90_226V6;Pp1s37_50V6;Pp1s29_142V6;Pp1s237_29V6;Pp1s241_33V6;Pp1s462_10V6;Pp1s12_270V6;Pp1s3_92V6;Pp1s79_105V6;Pp1s1_527V6;Pp1s21_393V6;Pp1s403_10V6;Pp1s66_184V6;Pp1s49_96V6;Pp1s174_60V6;Pp1s112_25V6;Pp1s378_11V6;Pp1s31_85V6;Pp1s73_26V6;Pp1s120_164V6;Pp1s44_81V6;Pp1s232_57V6;Pp1s99_26V6;Pp1s68_127V6;Pp1s244_82V6;Pp1s…	Pp1s325_68V6=2.205723697;Pp1s58_13V6=-2.420179465;Pp1s359_31V6=2.170269724;Pp1s169_138V6=-35.78492666;Pp1s192_88V6=3.951944213;Pp1s341_28V6=-2.774415881;Pp1s90_226V6=-2.707060613;Pp1s37_50V6=-2.344490534;Pp1s29_142V6=-3.59941989;Pp1s237_29V6=-2.627813077;Pp1s241_33V6=6.178971232;Pp1s462_10V6=-2.90784274;Pp1s12_270V6=-2.534350485;Pp1s3_92V6=2.408416604;Pp1s79_105V6=-4.941525867;Pp1s1_527V6=2.11209…	biological_process	http://amigo.geneontology.org/cgi-bin/amigo/term_details?term=GO:0009651
	GO:0042742 defense response to bacterium	3.51892	194	35	AT1G06680;AT1G09340;AT1G32060;AT2G01830;AT2G22240;AT2G39730;AT2G43710;AT3G01480;AT3G01500;AT3G04790;AT3G10920;AT3G12810;AT3G17210;AT3G27850;AT3G52960;AT3G55800;AT4G03280;AT4G09650;AT4G11150;AT4G23100;AT4G31550;AT4G32260;AT4G33430;AT4G33950;AT4G36690;AT5G06290;AT5G06320;AT5G08280;AT5G09650;AT5G14740;AT5G15090;AT5G52640;AT5G56360;AT5G64440;AT5G67330	7.50722e-11	1.10106e-09	Pp1s75_141V6;Pp1s71_283V6;Pp1s20_273V6;Pp1s6_398V6;Pp1s55_204V6;Pp1s258_44V6;Pp1s157_50V6;Pp1s90_50V6;Pp1s264_55V6;Pp1s234_39V6;Pp1s174_60V6;Pp1s452_20V6;Pp1s85_83V6;Pp1s72_208V6;Pp1s52_248V6;Pp1s429_29V6;Pp1s112_169V6;Pp1s16_358V6;Pp1s68_127V6;Pp1s479_14V6;Pp1s163_112V6;Pp1s186_83V6;Pp1s446_18V6;Pp1s116_98V6;Pp1s79_75V6;Pp1s30_345V6;Pp1s128_100V6;Pp1s291_39V6;Pp1s218_28V6;Pp1s43_118V6;Pp1s67_7V6…	Pp1s75_141V6=5.763651771;Pp1s71_283V6=3.397889655;Pp1s20_273V6=3.518848998;Pp1s6_398V6=2.197095015;Pp1s55_204V6=2.819430674;Pp1s258_44V6=2.100437426;Pp1s157_50V6=-2.404699887;Pp1s90_50V6=5.148586553;Pp1s264_55V6=5.682238905;Pp1s234_39V6=-2.345702373;Pp1s174_60V6=-2.946859311;Pp1s452_20V6=-5.799506862;Pp1s85_83V6=6.253230988;Pp1s72_208V6=3.165504343;Pp1s52_248V6=2.397974858;Pp1s429_29V6=5.09006047…	biological_process	http://amigo.geneontology.org/cgi-bin/amigo/term_details?term=GO:0042742
	GO:0046686 response to cadmium ion	3.64248	332	62	AT1G01060;AT1G07920;AT1G09780;AT1G11860;AT1G20630;AT1G42970;AT1G48420;AT1G50200;AT1G59900;AT1G60710;AT1G63770;AT1G68560;AT1G70730;AT1G79930;AT2G01140;AT2G17420;AT2G19940;AT2G23350;AT2G24200;AT2G33800;AT2G36530;AT2G42010;AT2G43750;AT2G44350;AT2G45290;AT2G47470;AT3G04120;AT3G12500;AT3G12780;AT3G12810;AT3G13920;AT3G14930;AT3G18190;AT3G20390;AT3G22890;AT3G22960;AT3G25800;AT3G46970;AT3G48000;AT3G48670…	0	0	Pp1s325_68V6;Pp1s7_451V6;Pp1s215_24V6;Pp1s91_92V6;Pp1s3_465V6;Pp1s86_156V6;Pp1s224_46V6;Pp1s164_16V6;Pp1s201_84V6;Pp1s309_8V6;Pp1s90_110V6;Pp1s80_200V6;Pp1s4_12V6;Pp1s67_237V6;Pp1s475_27V6;Pp1s8_297V6;Pp1s101_184V6;Pp1s257_72V6;Pp1s381_15V6;Pp1s61_236V6;Pp1s1_527V6;Pp1s324_22V6;Pp1s71_187V6;Pp1s37_33V6;Pp1s72_25V6;Pp1s201_115V6;Pp1s49_96V6;Pp1s309_77V6;Pp1s201_82V6;Pp1s452_20V6;Pp1s31_150V6;Pp1s3…	Pp1s325_68V6=2.205723697;Pp1s7_451V6=2.690051993;Pp1s215_24V6=3.997343933;Pp1s91_92V6=5.567005971;Pp1s3_465V6=-4.39570176;Pp1s86_156V6=6.968776164;Pp1s224_46V6=3.234551362;Pp1s164_16V6=2.657242434;Pp1s201_84V6=2.702330323;Pp1s309_8V6=-2.95051465;Pp1s90_110V6=-5.356563366;Pp1s80_200V6=6.071564133;Pp1s4_12V6=3.927296688;Pp1s67_237V6=2.252078131;Pp1s475_27V6=5.167169031;Pp1s8_297V6=3.177909364;Pp1s1…	biological_process	http://amigo.geneontology.org/cgi-bin/amigo/term_details?term=GO:0046686
	GO:0009409 response to cold	3.76542	259	50	AT1G01060;AT1G01140;AT1G09340;AT1G09780;AT1G20440;AT1G23740;AT1G24620;AT1G31812;AT1G32060;AT1G42970;AT1G56070;AT1G67090;AT1G67280;AT2G17840;AT2G18790;AT2G28900;AT2G33800;AT2G36530;AT2G37190;AT2G38905;AT2G39730;AT3G01500;AT3G02870;AT3G03050;AT3G07740;AT3G11170;AT3G12780;AT3G17020;AT3G22840;AT3G47520;AT3G49910;AT3G54050;AT4G01370;AT4G09650;AT4G11150;AT4G24280;AT4G31990;AT4G34150;AT4G35090;AT4G37930…	2.22045e-16	5.26075e-15	Pp1s325_68V6;Pp1s58_13V6;Pp1s71_283V6;Pp1s215_24V6;Pp1s421_9V6;Pp1s407_2V6;Pp1s4_293V6;Pp1s36_294V6;Pp1s20_273V6;Pp1s86_156V6;Pp1s138_81V6;Pp1s66_48V6;Pp1s72_285V6;Pp1s12_270V6;Pp1s81_159V6;Pp1s68_202V6;Pp1s61_236V6;Pp1s1_527V6;Pp1s78_212V6;Pp1s71_227V6;Pp1s258_44V6;Pp1s264_55V6;Pp1s275_35V6;Pp1s111_50V6;Pp1s432_11V6;Pp1s65_6V6;Pp1s201_82V6;Pp1s1_365V6;Pp1s371_45V6;Pp1s79_110V6;Pp1s30_298V6;Pp1s2…	Pp1s325_68V6=2.205723697;Pp1s58_13V6=-2.420179465;Pp1s71_283V6=3.397889655;Pp1s215_24V6=3.997343933;Pp1s421_9V6=-4.126459534;Pp1s407_2V6=4.567400743;Pp1s4_293V6=-2.554802649;Pp1s36_294V6=2.34346065;Pp1s20_273V6=3.518848998;Pp1s86_156V6=6.968776164;Pp1s138_81V6=2.178271942;Pp1s66_48V6=39.93086364;Pp1s72_285V6=-2.485412424;Pp1s12_270V6=-2.534350485;Pp1s81_159V6=-35.92243019;Pp1s68_202V6=3.337792306…	biological_process	http://amigo.geneontology.org/cgi-bin/amigo/term_details?term=GO:0009409
	GO:0009658 chloroplast organization	4.00785	73	15	AT1G06950;AT1G09340;AT1G63680;AT2G21170;AT2G28000;AT3G46740;AT3G47390;AT3G52750;AT4G39460;AT5G16620;AT5G35220;AT5G44190;AT5G45390;AT5G49940;AT5G50920	3.62993e-06	2.94216e-05	Pp1s509_22V6;Pp1s71_283V6;Pp1s156_150V6;Pp1s38_15V6;Pp1s16_322V6;Pp1s23_111V6;Pp1s24_97V6;Pp1s80_60V6;Pp1s450_16V6;Pp1s110_13V6;Pp1s191_1V6;Pp1s31_317V6;Pp1s390_3V6;Pp1s34_112V6;Pp1s23_102V6	Pp1s509_22V6=2.911471721;Pp1s71_283V6=3.397889655;Pp1s156_150V6=3.05282757;Pp1s38_15V6=-2.663991891;Pp1s16_322V6=2.35440702;Pp1s23_111V6=-5.163918288;Pp1s24_97V6=-4.841990193;Pp1s80_60V6=2.059122681;Pp1s450_16V6=4.04715882;Pp1s110_13V6=-5.75573446;Pp1s191_1V6=3.758913851;Pp1s31_317V6=4.448881966;Pp1s390_3V6=2.60717309;Pp1s34_112V6=-2.022721949;Pp1s23_102V6=-3.573794082	biological_process	http://amigo.geneontology.org/cgi-bin/amigo/term_details?term=GO:0009658
	GO:0006412 translation	4.16444	459	98	AT1G05190;AT1G07320;AT1G07830;AT1G08360;AT1G09620;AT1G15250;AT1G25260;AT1G26880;AT1G26910;AT1G27400;AT1G29070;AT1G41880;AT1G48350;AT1G54290;AT1G57660;AT1G61580;AT1G64510;AT1G68590;AT1G70600;AT1G74270;AT1G74970;AT1G75350;AT1G77940;AT1G78630;AT1G79850;AT2G13540;AT2G17360;AT2G19730;AT2G19740;AT2G24090;AT2G32060;AT2G33450;AT2G33800;AT2G34480;AT2G36170;AT2G36620;AT2G38140;AT2G40290;AT2G43030;AT3G04400…	0	0	Pp1s138_83V6;Pp1s196_122V6;Pp1s65_268V6;Pp1s40_297V6;Pp1s38_176V6;Pp1s152_133V6;Pp1s138_84V6;Pp1s200_25V6;Pp1s447_11V6;Pp1s364_56V6;Pp1s27_326V6;Pp1s45_64V6;Pp1s97_12V6;Pp1s4_134V6;Pp1s1_780V6;Pp1s154_134V6;Pp1s359_29V6;Pp1s242_42V6;Pp1s400_20V6;Pp1s1_549V6;Pp1s128_49V6;Pp1s378_8V6;Pp1s91_111V6;Pp1s152_173V6;Pp1s11_275V6;Pp1s41_19V6;Pp1s39_422V6;Pp1s98_65V6;Pp1s28_306V6;Pp1s324_20V6;Pp1s26_289V6;…	Pp1s138_83V6=2.481251234;Pp1s196_122V6=5.438185725;Pp1s65_268V6=2.474378376;Pp1s40_297V6=-3.32003749;Pp1s38_176V6=-5.653020773;Pp1s152_133V6=-3.482094248;Pp1s138_84V6=-2.516504279;Pp1s200_25V6=2.448217612;Pp1s447_11V6=3.541394105;Pp1s364_56V6=2.198518762;Pp1s27_326V6=3.448769559;Pp1s45_64V6=4.178358452;Pp1s97_12V6=4.429645747;Pp1s4_134V6=-3.380651422;Pp1s1_780V6=3.001479131;Pp1s154_134V6=2.224716…	biological_process	http://amigo.geneontology.org/cgi-bin/amigo/term_details?term=GO:0006412
	GO:0042254 ribosome biogenesis	5.42745	115	32	AT1G15250;AT1G25260;AT1G26880;AT1G29070;AT1G41880;AT1G42440;AT1G48350;AT1G48630;AT1G64510;AT1G74270;AT1G75350;AT2G19730;AT2G19740;AT2G34480;AT2G36620;AT2G37190;AT3G17170;AT3G27160;AT3G44890;AT3G49010;AT4G11630;AT4G18100;AT4G22380;AT5G02610;AT5G03850;AT5G13510;AT5G14320;AT5G28060;AT5G39740;AT5G56940;AT5G64670;AT5G65220	1.77636e-15	3.41949e-14	Pp1s152_133V6;Pp1s138_84V6;Pp1s200_25V6;Pp1s27_326V6;Pp1s45_64V6;Pp1s30_137V6;Pp1s97_12V6;Pp1s276_2V6;Pp1s359_29V6;Pp1s1_549V6;Pp1s378_8V6;Pp1s98_65V6;Pp1s28_306V6;Pp1s5_178V6;Pp1s63_123V6;Pp1s78_212V6;Pp1s36_299V6;Pp1s32_202V6;Pp1s536_9V6;Pp1s459_9V6;Pp1s44_176V6;Pp1s98_19V6;Pp1s65_24V6;Pp1s1_489V6;Pp1s41_71V6;Pp1s76_199V6;Pp1s258_19V6;Pp1s204_49V6;Pp1s97_115V6;Pp1s38_249V6;Pp1s88_135V6;Pp1s89_2…	Pp1s152_133V6=-3.482094248;Pp1s138_84V6=-2.516504279;Pp1s200_25V6=2.448217612;Pp1s27_326V6=3.448769559;Pp1s45_64V6=4.178358452;Pp1s30_137V6=-2.204560272;Pp1s97_12V6=4.429645747;Pp1s276_2V6=3.144167882;Pp1s359_29V6=3.58046709;Pp1s1_549V6=3.308051384;Pp1s378_8V6=2.832319793;Pp1s98_65V6=2.13528973;Pp1s28_306V6=3.559725928;Pp1s5_178V6=2.205723697;Pp1s63_123V6=4.119585648;Pp1s78_212V6=2.608364908;Pp1s…	biological_process	http://amigo.geneontology.org/cgi-bin/amigo/term_details?term=GO:0042254
	GO:0006096 glycolysis	5.63475	45	13	AT1G01090;AT1G12900;AT1G16300;AT1G42970;AT1G79550;AT3G04120;AT3G12780;AT3G22960;AT3G52990;AT4G04040;AT4G26270;AT5G08570;AT5G58330	2.51609e-07	2.42173e-06	Pp1s318_24V6;Pp1s135_29V6;Pp1s309_73V6;Pp1s86_156V6;Pp1s59_111V6;Pp1s49_96V6;Pp1s201_82V6;Pp1s70_15V6;Pp1s170_89V6;Pp1s183_75V6;Pp1s327_30V6;Pp1s90_134V6;Pp1s65_267V6	Pp1s318_24V6=4.777292381;Pp1s135_29V6=6.022654532;Pp1s309_73V6=2.435979576;Pp1s86_156V6=6.968776164;Pp1s59_111V6=2.050940461;Pp1s49_96V6=-37.49942198;Pp1s201_82V6=9.013397425;Pp1s70_15V6=2.265759662;Pp1s170_89V6=3.374755665;Pp1s183_75V6=3.869787069;Pp1s327_30V6=-4.735074989;Pp1s90_134V6=2.730899475;Pp1s65_267V6=4.926595159	biological_process	http://amigo.geneontology.org/cgi-bin/amigo/term_details?term=GO:0006096
	GO:0009853 photorespiration	5.91057	33	10	AT1G19580;AT1G68010;AT1G70580;AT2G31490;AT3G18410;AT4G00585;AT4G37930;AT5G04140;AT5G37510;AT5G52840	3.81276e-06	3.01111e-05	Pp1s207_12V6;Pp1s3_572V6;Pp1s64_220V6;Pp1s395_22V6;Pp1s131_195V6;Pp1s75_42V6;Pp1s21_270V6;Pp1s212_44V6;Pp1s170_67V6;Pp1s236_34V6	Pp1s207_12V6=3.625514726;Pp1s3_572V6=2.721695648;Pp1s64_220V6=2.260820612;Pp1s395_22V6=2.742972308;Pp1s131_195V6=4.18775715;Pp1s75_42V6=2.050395269;Pp1s21_270V6=3.710863399;Pp1s212_44V6=4.163718139;Pp1s170_67V6=2.71487062;Pp1s236_34V6=2.580935216	biological_process	http://amigo.geneontology.org/cgi-bin/amigo/term_details?term=GO:0009853
	GO:0015995 chlorophyll biosynthetic process	6.26943	28	9	AT1G08520;AT1G58290;AT1G74470;AT3G14110;AT3G51820;AT4G25080;AT5G08280;AT5G18660;AT5G54190	6.79843e-06	4.86958e-05	Pp1s66_287V6;Pp1s256_38V6;Pp1s425_20V6;Pp1s39_367V6;Pp1s5_30V6;Pp1s372_25V6;Pp1s291_39V6;Pp1s136_41V6;Pp1s146_112V6	Pp1s66_287V6=4.487930693;Pp1s256_38V6=2.475559461;Pp1s425_20V6=3.708728094;Pp1s39_367V6=2.619189088;Pp1s5_30V6=2.16001216;Pp1s372_25V6=4.912897309;Pp1s291_39V6=2.273487024;Pp1s136_41V6=4.49785981;Pp1s146_112V6=4.706651929	biological_process	http://amigo.geneontology.org/cgi-bin/amigo/term_details?term=GO:0015995
	GO:0015979 photosynthesis	7.03083	86	31	AT1G03130;AT1G15820;AT1G30380;AT1G31330;AT1G43670;AT1G52230;AT1G55670;AT1G61520;AT1G61800;AT1G67740;AT1G76450;AT1G79040;AT2G05070;AT2G05100;AT2G06520;AT2G18790;AT2G20260;AT2G40300;AT3G05410;AT3G54050;AT3G54890;AT3G55330;AT3G61470;AT3G63540;AT4G04040;AT4G09650;AT4G10340;AT4G12800;AT4G22890;AT4G28660;AT5G54270	4.44089e-16	9.43307e-15	Pp1s4_321V6;Pp1s28_319V6;Pp1s74_135V6;Pp1s80_23V6;Pp1s1_300V6;Pp1s89_62V6;Pp1s83_246V6;Pp1s429_33V6;Pp1s70_177V6;Pp1s221_76V6;Pp1s13_430V6;Pp1s54_167V6;Pp1s252_28V6;Pp1s76_196V6;Pp1s31_66V6;Pp1s81_159V6;Pp1s334_17V6;Pp1s51_217V6;Pp1s125_61V6;Pp1s20_373V6;Pp1s247_7V6;Pp1s30_39V6;Pp1s651_2V6;Pp1s227_133V6;Pp1s183_75V6;Pp1s16_358V6;Pp1s6_313V6;Pp1s54_165V6;Pp1s145_159V6;Pp1s311_70V6;Pp1s254_3V6	Pp1s4_321V6=3.711972905;Pp1s28_319V6=4.22299433;Pp1s74_135V6=4.555034232;Pp1s80_23V6=5.044126354;Pp1s1_300V6=-2.228407014;Pp1s89_62V6=4.6740016;Pp1s83_246V6=5.316409113;Pp1s429_33V6=3.55928168;Pp1s70_177V6=2.956086915;Pp1s221_76V6=4.021217964;Pp1s13_430V6=2.440523221;Pp1s54_167V6=2.730209356;Pp1s252_28V6=3.386026777;Pp1s76_196V6=5.650931171;Pp1s31_66V6=6.676859636;Pp1s81_159V6=-35.92243019;Pp1s33…	biological_process	http://amigo.geneontology.org/cgi-bin/amigo/term_details?term=GO:0015979
	GO:0010027 thylakoid membrane organization	8.86586	22	10	AT1G32500;AT1G65260;AT2G20890;AT2G28800;AT2G30950;AT3G24590;AT3G47450;AT4G14870;AT4G31780;AT5G35220	4.47175e-08	4.59099e-07	Pp1s391_38V6;Pp1s322_14V6;Pp1s132_186V6;Pp1s381_17V6;Pp1s178_66V6;Pp1s10_253V6;Pp1s2_53V6;Pp1s22_325V6;Pp1s20_66V6;Pp1s191_1V6	Pp1s391_38V6=2.605822342;Pp1s322_14V6=-3.857133679;Pp1s132_186V6=2.692346235;Pp1s381_17V6=2.758913851;Pp1s178_66V6=-3.19248744;Pp1s10_253V6=-2.240184182;Pp1s2_53V6=2.195370334;Pp1s22_325V6=4.346793836;Pp1s20_66V6=3.074663371;Pp1s191_1V6=3.758913851	biological_process	http://amigo.geneontology.org/cgi-bin/amigo/term_details?term=GO:0010027
	GO:0009773 photosynthetic electron transport in photosystem I	9.10228	15	7	AT1G15980;AT1G55670;AT2G05620;AT2G46820;AT3G54050;AT4G09650;AT4G22890	4.10719e-06	3.04822e-05	Pp1s89_87V6;Pp1s83_246V6;Pp1s16_274V6;Pp1s54_32V6;Pp1s20_373V6;Pp1s16_358V6;Pp1s145_159V6	Pp1s89_87V6=3.813361636;Pp1s83_246V6=5.316409113;Pp1s16_274V6=3.152991732;Pp1s54_32V6=2.716685616;Pp1s20_373V6=4.18037762;Pp1s16_358V6=2.236666751;Pp1s145_159V6=2.376560162	biological_process	http://amigo.geneontology.org/cgi-bin/amigo/term_details?term=GO:0009773
	GO:0045037 protein import into chloroplast stroma	11.7029	10	6	AT1G04940;AT1G06950;AT2G20890;AT2G28900;AT5G16620;AT5G50920	3.1598e-06	2.63032e-05	Pp1s54_101V6;Pp1s509_22V6;Pp1s132_186V6;Pp1s68_202V6;Pp1s110_13V6;Pp1s23_102V6	Pp1s54_101V6=2.999312061;Pp1s509_22V6=2.911471721;Pp1s132_186V6=2.692346235;Pp1s68_202V6=3.337792306;Pp1s110_13V6=-5.75573446;Pp1s23_102V6=-3.573794082	biological_process	http://amigo.geneontology.org/cgi-bin/amigo/term_details?term=GO:0045037
cellular component	GO:0005773 vacuole	2.38228	524	64	AT1G02305;AT1G09340;AT1G12240;AT1G17100;AT1G18070;AT1G19910;AT1G27100;AT1G27400;AT1G30360;AT1G32400;AT1G44170;AT1G47128;AT1G53210;AT1G53590;AT1G59610;AT1G63770;AT1G65820;AT1G66200;AT1G73650;AT1G79690;AT1G80310;AT2G24200;AT2G28100;AT2G28900;AT2G37190;AT2G46800;AT3G05590;AT3G09630;AT3G10410;AT3G12500;AT3G20390;AT3G42050;AT3G44330;AT3G46060;AT3G62110;AT3G62290;AT3G63520;AT4G02620;AT4G10050;AT4G11150…	1.27387e-10	1.78342e-09	Pp1s7_406V6;Pp1s71_283V6;Pp1s177_28V6;Pp1s60_274V6;Pp1s54_148V6;Pp1s45_97V6;Pp1s119_48V6;Pp1s364_56V6;Pp1s53_138V6;Pp1s54_192V6;Pp1s90_226V6;Pp1s49_32V6;Pp1s6_337V6;Pp1s328_47V6;Pp1s38_177V6;Pp1s90_110V6;Pp1s182_83V6;Pp1s241_33V6;Pp1s133_16V6;Pp1s259_32V6;Pp1s336_69V6;Pp1s381_15V6;Pp1s55_131V6;Pp1s68_202V6;Pp1s78_212V6;Pp1s102_71V6;Pp1s536_8V6;Pp1s10_102V6;Pp1s814_3V6;Pp1s309_77V6;Pp1s37_67V6;Pp1…	Pp1s7_406V6=-2.603109649;Pp1s71_283V6=3.397889655;Pp1s177_28V6=3.89069793;Pp1s60_274V6=-3.858002511;Pp1s54_148V6=-2.931183922;Pp1s45_97V6=2.368329396;Pp1s119_48V6=-3.674045556;Pp1s364_56V6=2.198518762;Pp1s53_138V6=-2.212295921;Pp1s54_192V6=-3.199085142;Pp1s90_226V6=-2.707060613;Pp1s49_32V6=6.334598539;Pp1s6_337V6=-2.326550797;Pp1s328_47V6=-4.564456218;Pp1s38_177V6=2.946749051;Pp1s90_110V6=-5.3565…	cellular_component	http://amigo.geneontology.org/cgi-bin/amigo/term_details?term=GO:0005773
	GO:0005739 mitochondrion	2.79203	992	142	AT1G05030;AT1G07830;AT1G07920;AT1G10510;AT1G10760;AT1G11860;AT1G14810;AT1G15120;AT1G19580;AT1G20630;AT1G22520;AT1G22840;AT1G23100;AT1G23800;AT1G24180;AT1G32470;AT1G47640;AT1G48420;AT1G48635;AT1G49410;AT1G49670;AT1G50200;AT1G50940;AT1G51980;AT1G55160;AT1G59900;AT1G61570;AT1G70320;AT1G72170;AT1G72270;AT1G79010;AT1G79440;AT1G80230;AT2G01140;AT2G02510;AT2G04940;AT2G15620;AT2G20360;AT2G21170;AT2G25840…	0	0	Pp1s199_7V6;Pp1s65_268V6;Pp1s7_451V6;Pp1s69_146V6;Pp1s8_70V6;Pp1s91_92V6;Pp1s263_36V6;Pp1s491_11V6;Pp1s207_12V6;Pp1s3_465V6;Pp1s53_177V6;Pp1s109_97V6;Pp1s155_1V6;Pp1s93_81V6;Pp1s169_138V6;Pp1s272_32V6;Pp1s161_106V6;Pp1s224_46V6;Pp1s114_119V6;Pp1s252_26V6;Pp1s138_42V6;Pp1s164_16V6;Pp1s206_83V6;Pp1s37_50V6;Pp1s79_49V6;Pp1s201_84V6;Pp1s168_35V6;Pp1s67_251V6;Pp1s15_130V6;Pp1s22_50V6;Pp1s24_200V6;Pp1s…	Pp1s199_7V6=-3.594794381;Pp1s65_268V6=2.474378376;Pp1s7_451V6=2.690051993;Pp1s69_146V6=-2.719133445;Pp1s8_70V6=-2.492805241;Pp1s91_92V6=5.567005971;Pp1s263_36V6=2.207935032;Pp1s491_11V6=2.058474133;Pp1s207_12V6=3.625514726;Pp1s3_465V6=-4.39570176;Pp1s53_177V6=3.114228115;Pp1s109_97V6=2.221704482;Pp1s155_1V6=2.60279465;Pp1s93_81V6=-2.651076003;Pp1s169_138V6=-35.78492666;Pp1s272_32V6=5.90703571;Pp1…	cellular_component	http://amigo.geneontology.org/cgi-bin/amigo/term_details?term=GO:0005739
	GO:0048046 apoplast	2.99155	326	50	AT1G06680;AT1G09340;AT1G11860;AT1G12900;AT1G16080;AT1G23740;AT1G29660;AT1G32060;AT1G42970;AT1G47128;AT1G47710;AT1G63770;AT1G66200;AT1G67090;AT1G68010;AT1G68560;AT1G79550;AT2G15620;AT2G21170;AT2G28000;AT2G28190;AT2G36530;AT2G39730;AT2G43750;AT3G01500;AT3G04120;AT3G12780;AT3G47520;AT3G54050;AT3G55800;AT3G57610;AT4G03210;AT4G25000;AT4G31990;AT4G37930;AT5G02240;AT5G04140;AT5G04590;AT5G06290;AT5G08280…	4.20419e-12	6.81522e-11	Pp1s75_141V6;Pp1s71_283V6;Pp1s91_92V6;Pp1s135_29V6;Pp1s163_113V6;Pp1s407_2V6;Pp1s28_238V6;Pp1s20_273V6;Pp1s86_156V6;Pp1s49_32V6;Pp1s86_63V6;Pp1s90_110V6;Pp1s241_33V6;Pp1s66_48V6;Pp1s3_572V6;Pp1s80_200V6;Pp1s59_111V6;Pp1s197_146V6;Pp1s38_15V6;Pp1s16_322V6;Pp1s131_71V6;Pp1s1_527V6;Pp1s258_44V6;Pp1s71_187V6;Pp1s264_55V6;Pp1s49_96V6;Pp1s201_82V6;Pp1s79_110V6;Pp1s20_373V6;Pp1s429_29V6;Pp1s66_188V6;Pp1…	Pp1s75_141V6=5.763651771;Pp1s71_283V6=3.397889655;Pp1s91_92V6=5.567005971;Pp1s135_29V6=6.022654532;Pp1s163_113V6=36.47143202;Pp1s407_2V6=4.567400743;Pp1s28_238V6=3.941117183;Pp1s20_273V6=3.518848998;Pp1s86_156V6=6.968776164;Pp1s49_32V6=6.334598539;Pp1s86_63V6=-3.313084729;Pp1s90_110V6=-5.356563366;Pp1s241_33V6=6.178971232;Pp1s66_48V6=39.93086364;Pp1s3_572V6=2.721695648;Pp1s80_200V6=6.071564133;Pp…	cellular_component	http://amigo.geneontology.org/cgi-bin/amigo/term_details?term=GO:0048046
	GO:0005774 vacuolar membrane	3.51728	427	77	AT1G07920;AT1G08470;AT1G17100;AT1G19910;AT1G21720;AT1G22840;AT1G27400;AT1G30360;AT1G30630;AT1G36050;AT1G51980;AT1G53210;AT1G56070;AT1G61800;AT1G64650;AT1G70330;AT1G70770;AT1G73650;AT1G79550;AT2G01770;AT2G01970;AT2G05070;AT2G17360;AT2G27030;AT2G33150;AT2G34480;AT2G41700;AT2G45260;AT2G46800;AT2G47470;AT3G04120;AT3G05590;AT3G12500;AT3G13772;AT3G13870;AT3G17040;AT3G25780;AT3G27325;AT3G42050;AT3G44330…	0	0	Pp1s7_451V6;Pp1s55_90V6;Pp1s60_274V6;Pp1s45_97V6;Pp1s130_217V6;Pp1s109_97V6;Pp1s364_56V6;Pp1s53_138V6;Pp1s54_149V6;Pp1s38_335V6;Pp1s37_50V6;Pp1s6_337V6;Pp1s138_81V6;Pp1s70_177V6;Pp1s44_143V6;Pp1s40_4V6;Pp1s123_141V6;Pp1s133_16V6;Pp1s59_111V6;Pp1s76_45V6;Pp1s373_13V6;Pp1s252_28V6;Pp1s39_422V6;Pp1s79_158V6;Pp1s55_275V6;Pp1s5_178V6;Pp1s115_120V6;Pp1s23_229V6;Pp1s102_71V6;Pp1s201_115V6;Pp1s49_96V6;Pp…	Pp1s7_451V6=2.690051993;Pp1s55_90V6=2.616030477;Pp1s60_274V6=-3.858002511;Pp1s45_97V6=2.368329396;Pp1s130_217V6=4.57108579;Pp1s109_97V6=2.221704482;Pp1s364_56V6=2.198518762;Pp1s53_138V6=-2.212295921;Pp1s54_149V6=4.199161914;Pp1s38_335V6=-2.118830398;Pp1s37_50V6=-2.344490534;Pp1s6_337V6=-2.326550797;Pp1s138_81V6=2.178271942;Pp1s70_177V6=2.956086915;Pp1s44_143V6=3.576799441;Pp1s40_4V6=-2.721135798;…	cellular_component	http://amigo.geneontology.org/cgi-bin/amigo/term_details?term=GO:0005774
	GO:0009536 plastid	4.24019	138	30	AT1G01090;AT1G10510;AT1G16300;AT1G21650;AT1G32500;AT1G44170;AT1G51980;AT1G55160;AT2G02500;AT2G04940;AT2G21280;AT2G43710;AT2G43750;AT3G20390;AT3G29320;AT3G63170;AT4G00860;AT4G31990;AT4G32400;AT4G39460;AT5G04590;AT5G08040;AT5G12860;AT5G15090;AT5G23890;AT5G24690;AT5G33320;AT5G43970;AT5G55610;AT5G56940	1.36254e-11	2.09832e-10	Pp1s318_24V6;Pp1s69_146V6;Pp1s309_73V6;Pp1s338_68V6;Pp1s391_38V6;Pp1s90_226V6;Pp1s37_50V6;Pp1s79_49V6;Pp1s211_107V6;Pp1s312_29V6;Pp1s87_131V6;Pp1s157_50V6;Pp1s71_187V6;Pp1s37_67V6;Pp1s53_212V6;Pp1s138_75V6;Pp1s392_46V6;Pp1s540_7V6;Pp1s61_194V6;Pp1s450_16V6;Pp1s160_137V6;Pp1s112_191V6;Pp1s17_363V6;Pp1s67_7V6;Pp1s89_183V6;Pp1s57_231V6;Pp1s9_113V6;Pp1s379_37V6;Pp1s148_28V6;Pp1s38_249V6	Pp1s318_24V6=4.777292381;Pp1s69_146V6=-2.719133445;Pp1s309_73V6=2.435979576;Pp1s338_68V6=-4.368536008;Pp1s391_38V6=2.605822342;Pp1s90_226V6=-2.707060613;Pp1s37_50V6=-2.344490534;Pp1s79_49V6=4.772719651;Pp1s211_107V6=2.571345011;Pp1s312_29V6=-2.470454332;Pp1s87_131V6=4.865829055;Pp1s157_50V6=-2.404699887;Pp1s71_187V6=-2.415127258;Pp1s37_67V6=3.876717372;Pp1s53_212V6=2.115000808;Pp1s138_75V6=4.6911…	cellular_component	http://amigo.geneontology.org/cgi-bin/amigo/term_details?term=GO:0009536
	GO:0005840 ribosome	4.45387	254	58	AT1G07320;AT1G07830;AT1G08360;AT1G09340;AT1G15250;AT1G25260;AT1G26880;AT1G26910;AT1G27400;AT1G29070;AT1G41880;AT1G48350;AT1G57660;AT1G61580;AT1G64510;AT1G70600;AT1G74270;AT1G75350;AT1G78630;AT2G19730;AT2G19740;AT2G24090;AT2G33450;AT2G33800;AT2G34480;AT2G36620;AT2G37190;AT2G38140;AT2G43030;AT3G04400;AT3G05560;AT3G09630;AT3G17170;AT3G27160;AT3G43980;AT3G44590;AT3G44890;AT3G49010;AT3G54210;AT3G57490…	0	0	Pp1s196_122V6;Pp1s65_268V6;Pp1s40_297V6;Pp1s71_283V6;Pp1s152_133V6;Pp1s138_84V6;Pp1s200_25V6;Pp1s447_11V6;Pp1s364_56V6;Pp1s27_326V6;Pp1s45_64V6;Pp1s97_12V6;Pp1s1_780V6;Pp1s154_134V6;Pp1s359_29V6;Pp1s400_20V6;Pp1s1_549V6;Pp1s378_8V6;Pp1s152_173V6;Pp1s98_65V6;Pp1s28_306V6;Pp1s324_20V6;Pp1s229_21V6;Pp1s61_236V6;Pp1s5_178V6;Pp1s63_123V6;Pp1s78_212V6;Pp1s258_80V6;Pp1s117_86V6;Pp1s15_152V6;Pp1s283_20V6…	Pp1s196_122V6=5.438185725;Pp1s65_268V6=2.474378376;Pp1s40_297V6=-3.32003749;Pp1s71_283V6=3.397889655;Pp1s152_133V6=-3.482094248;Pp1s138_84V6=-2.516504279;Pp1s200_25V6=2.448217612;Pp1s447_11V6=3.541394105;Pp1s364_56V6=2.198518762;Pp1s27_326V6=3.448769559;Pp1s45_64V6=4.178358452;Pp1s97_12V6=4.429645747;Pp1s1_780V6=3.001479131;Pp1s154_134V6=2.22471644;Pp1s359_29V6=3.58046709;Pp1s400_20V6=2.603275497…	cellular_component	http://amigo.geneontology.org/cgi-bin/amigo/term_details?term=GO:0005840
	GO:0022626 cytosolic ribosome	4.85096	193	48	AT1G07320;AT1G08360;AT1G11860;AT1G20630;AT1G25260;AT1G48630;AT1G66200;AT1G67090;AT1G70600;AT1G77940;AT2G19730;AT2G19740;AT2G28000;AT2G32060;AT2G34480;AT2G37190;AT3G05560;AT3G09630;AT3G25860;AT3G44590;AT3G48930;AT3G49010;AT3G49910;AT3G62870;AT4G01310;AT4G10450;AT4G11150;AT4G16720;AT4G18100;AT4G25890;AT4G34670;AT4G35090;AT4G36130;AT4G37930;AT5G02610;AT5G07090;AT5G10360;AT5G13510;AT5G15200;AT5G15650…	0	0	Pp1s196_122V6;Pp1s40_297V6;Pp1s91_92V6;Pp1s3_465V6;Pp1s138_84V6;Pp1s276_2V6;Pp1s241_33V6;Pp1s66_48V6;Pp1s400_20V6;Pp1s91_111V6;Pp1s98_65V6;Pp1s28_306V6;Pp1s16_322V6;Pp1s26_289V6;Pp1s5_178V6;Pp1s78_212V6;Pp1s283_20V6;Pp1s10_102V6;Pp1s351_30V6;Pp1s409_34V6;Pp1s21_269V6;Pp1s459_9V6;Pp1s30_298V6;Pp1s37_339V6;Pp1s358_49V6;Pp1s58_149V6;Pp1s68_127V6;Pp1s7_364V6;Pp1s98_19V6;Pp1s266_20V6;Pp1s80_113V6;Pp1s…	Pp1s196_122V6=5.438185725;Pp1s40_297V6=-3.32003749;Pp1s91_92V6=5.567005971;Pp1s3_465V6=-4.39570176;Pp1s138_84V6=-2.516504279;Pp1s276_2V6=3.144167882;Pp1s241_33V6=6.178971232;Pp1s66_48V6=39.93086364;Pp1s400_20V6=2.603275497;Pp1s91_111V6=2.590762094;Pp1s98_65V6=2.13528973;Pp1s28_306V6=3.559725928;Pp1s16_322V6=2.35440702;Pp1s26_289V6=4.295122938;Pp1s5_178V6=2.205723697;Pp1s78_212V6=2.608364908;Pp1s2…	cellular_component	http://amigo.geneontology.org/cgi-bin/amigo/term_details?term=GO:0022626
	GO:0022625 cytosolic large ribosomal subunit	4.99325	125	32	AT1G08360;AT1G15250;AT1G27400;AT1G41880;AT1G61580;AT1G70600;AT1G74270;AT1G77940;AT2G19730;AT2G19740;AT2G34480;AT2G36170;AT2G36620;AT2G37190;AT3G04400;AT3G05560;AT3G05590;AT3G09630;AT3G49010;AT3G49910;AT3G62870;AT4G01310;AT4G10450;AT4G14320;AT4G16720;AT4G18100;AT4G18730;AT4G36130;AT5G02610;AT5G39740;AT5G45775;AT5G48760	2.27596e-14	4.1235e-13	Pp1s40_297V6;Pp1s152_133V6;Pp1s364_56V6;Pp1s45_64V6;Pp1s154_134V6;Pp1s400_20V6;Pp1s1_549V6;Pp1s91_111V6;Pp1s98_65V6;Pp1s28_306V6;Pp1s5_178V6;Pp1s284_11V6;Pp1s63_123V6;Pp1s78_212V6;Pp1s15_152V6;Pp1s283_20V6;Pp1s536_8V6;Pp1s10_102V6;Pp1s459_9V6;Pp1s30_298V6;Pp1s37_339V6;Pp1s358_49V6;Pp1s58_149V6;Pp1s6_198V6;Pp1s7_364V6;Pp1s98_19V6;Pp1s265_52V6;Pp1s37_66V6;Pp1s1_489V6;Pp1s97_115V6;Pp1s54_157V6;Pp1s6…	Pp1s40_297V6=-3.32003749;Pp1s152_133V6=-3.482094248;Pp1s364_56V6=2.198518762;Pp1s45_64V6=4.178358452;Pp1s154_134V6=2.22471644;Pp1s400_20V6=2.603275497;Pp1s1_549V6=3.308051384;Pp1s91_111V6=2.590762094;Pp1s98_65V6=2.13528973;Pp1s28_306V6=3.559725928;Pp1s5_178V6=2.205723697;Pp1s284_11V6=6.628329742;Pp1s63_123V6=4.119585648;Pp1s78_212V6=2.608364908;Pp1s15_152V6=3.293814543;Pp1s283_20V6=-2.830494554;P…	cellular_component	http://amigo.geneontology.org/cgi-bin/amigo/term_details?term=GO:0022625
	GO:0009570 chloroplast stroma	6.80969	401	140	AT1G02560;AT1G04420;AT1G05190;AT1G06680;AT1G07320;AT1G09340;AT1G10760;AT1G12900;AT1G14810;AT1G15140;AT1G16080;AT1G23740;AT1G24360;AT1G32060;AT1G42970;AT1G50320;AT1G50900;AT1G55480;AT1G56050;AT1G56500;AT1G60950;AT1G63770;AT1G65260;AT1G67090;AT1G67280;AT1G69740;AT1G70580;AT1G70730;AT1G74970;AT1G75350;AT1G75690;AT1G78630;AT1G79850;AT1G80480;AT1G80920;AT2G02500;AT2G15620;AT2G19940;AT2G20890;AT2G21170…	0	0	Pp1s212_7V6;Pp1s450_1V6;Pp1s138_83V6;Pp1s75_141V6;Pp1s196_122V6;Pp1s71_283V6;Pp1s8_70V6;Pp1s135_29V6;Pp1s263_36V6;Pp1s9_406V6;Pp1s163_113V6;Pp1s407_2V6;Pp1s33_206V6;Pp1s20_273V6;Pp1s86_156V6;Pp1s274_79V6;Pp1s116_33V6;Pp1s20_130V6;Pp1s53_123V6;Pp1s71_244V6;Pp1s381_46V6;Pp1s90_110V6;Pp1s322_14V6;Pp1s66_48V6;Pp1s72_285V6;Pp1s450_21V6;Pp1s64_220V6;Pp1s4_12V6;Pp1s128_49V6;Pp1s378_8V6;Pp1s301_31V6;Pp1s…	Pp1s212_7V6=2.017126157;Pp1s450_1V6=3.039021771;Pp1s138_83V6=2.481251234;Pp1s75_141V6=5.763651771;Pp1s196_122V6=5.438185725;Pp1s71_283V6=3.397889655;Pp1s8_70V6=-2.492805241;Pp1s135_29V6=6.022654532;Pp1s263_36V6=2.207935032;Pp1s9_406V6=4.575418211;Pp1s163_113V6=36.47143202;Pp1s407_2V6=4.567400743;Pp1s33_206V6=2.698399272;Pp1s20_273V6=3.518848998;Pp1s86_156V6=6.968776164;Pp1s274_79V6=2.662545457;Pp…	cellular_component	http://amigo.geneontology.org/cgi-bin/amigo/term_details?term=GO:0009570
	GO:0009535 chloroplast thylakoid membrane	6.85475	313	110	AT1G03130;AT1G03600;AT1G06680;AT1G07320;AT1G12250;AT1G15820;AT1G15980;AT1G30380;AT1G31330;AT1G32060;AT1G33810;AT1G42970;AT1G44575;AT1G51400;AT1G52220;AT1G52230;AT1G54500;AT1G54780;AT1G55480;AT1G55670;AT1G61520;AT1G64510;AT1G65260;AT1G67090;AT1G67740;AT1G68590;AT1G73110;AT1G74470;AT1G74730;AT1G75690;AT1G76450;AT1G79040;AT2G05070;AT2G05100;AT2G05620;AT2G06520;AT2G17972;AT2G20260;AT2G20890;AT2G21530…	4.44089e-16	9.43307e-15	Pp1s4_321V6;Pp1s131_184V6;Pp1s75_141V6;Pp1s196_122V6;Pp1s85_113V6;Pp1s28_319V6;Pp1s89_87V6;Pp1s74_135V6;Pp1s80_23V6;Pp1s20_273V6;Pp1s1_789V6;Pp1s86_156V6;Pp1s31_279V6;Pp1s259_76V6;Pp1s15_328V6;Pp1s89_62V6;Pp1s59_328V6;Pp1s123_97V6;Pp1s20_130V6;Pp1s83_246V6;Pp1s429_33V6;Pp1s359_29V6;Pp1s322_14V6;Pp1s66_48V6;Pp1s221_76V6;Pp1s242_42V6;Pp1s378_41V6;Pp1s425_20V6;Pp1s268_34V6;Pp1s301_31V6;Pp1s13_430V6;…	Pp1s4_321V6=3.711972905;Pp1s131_184V6=3.830435149;Pp1s75_141V6=5.763651771;Pp1s196_122V6=5.438185725;Pp1s85_113V6=2.405158327;Pp1s28_319V6=4.22299433;Pp1s89_87V6=3.813361636;Pp1s74_135V6=4.555034232;Pp1s80_23V6=5.044126354;Pp1s20_273V6=3.518848998;Pp1s1_789V6=3.559205381;Pp1s86_156V6=6.968776164;Pp1s31_279V6=2.556725001;Pp1s259_76V6=6.759096367;Pp1s15_328V6=2.134383799;Pp1s89_62V6=4.6740016;Pp1s5…	cellular_component	http://amigo.geneontology.org/cgi-bin/amigo/term_details?term=GO:0009535
	GO:0009941 chloroplast envelope	6.86725	409	144	AT1G01090;AT1G01790;AT1G02560;AT1G03130;AT1G04420;AT1G05190;AT1G06680;AT1G06950;AT1G09340;AT1G10510;AT1G10760;AT1G11860;AT1G12900;AT1G15140;AT1G15820;AT1G16080;AT1G17220;AT1G20630;AT1G23740;AT1G24360;AT1G26910;AT1G30360;AT1G31330;AT1G32060;AT1G32080;AT1G33810;AT1G42970;AT1G48350;AT1G52570;AT1G55480;AT1G55670;AT1G63770;AT1G64520;AT1G65260;AT1G66200;AT1G67090;AT1G74470;AT1G74970;AT1G75350;AT1G77590…	0	0	Pp1s318_24V6;Pp1s31_202V6;Pp1s212_7V6;Pp1s4_321V6;Pp1s450_1V6;Pp1s138_83V6;Pp1s75_141V6;Pp1s509_22V6;Pp1s71_283V6;Pp1s69_146V6;Pp1s8_70V6;Pp1s91_92V6;Pp1s135_29V6;Pp1s9_406V6;Pp1s28_319V6;Pp1s163_113V6;Pp1s59_148V6;Pp1s3_465V6;Pp1s407_2V6;Pp1s33_206V6;Pp1s447_11V6;Pp1s53_138V6;Pp1s80_23V6;Pp1s20_273V6;Pp1s63_96V6;Pp1s1_789V6;Pp1s86_156V6;Pp1s97_12V6;Pp1s94_26V6;Pp1s20_130V6;Pp1s83_246V6;Pp1s90_11…	Pp1s318_24V6=4.777292381;Pp1s31_202V6=-4.111450868;Pp1s212_7V6=2.017126157;Pp1s4_321V6=3.711972905;Pp1s450_1V6=3.039021771;Pp1s138_83V6=2.481251234;Pp1s75_141V6=5.763651771;Pp1s509_22V6=2.911471721;Pp1s71_283V6=3.397889655;Pp1s69_146V6=-2.719133445;Pp1s8_70V6=-2.492805241;Pp1s91_92V6=5.567005971;Pp1s135_29V6=6.022654532;Pp1s9_406V6=4.575418211;Pp1s28_319V6=4.22299433;Pp1s163_113V6=36.47143202;Pp1…	cellular_component	http://amigo.geneontology.org/cgi-bin/amigo/term_details?term=GO:0009941
	GO:0009543 chloroplast thylakoid lumen	7.14264	71	26	AT1G03600;AT1G06680;AT1G08550;AT1G12250;AT1G14590;AT1G51400;AT1G54780;AT1G74070;AT1G76100;AT1G76450;AT2G23670;AT3G01480;AT3G10060;AT3G21055;AT3G27925;AT3G50820;AT3G55330;AT3G57680;AT4G02530;AT4G09010;AT4G21280;AT4G24930;AT5G23120;AT5G39830;AT5G45680;AT5G64350	1.11022e-16	2.97347e-15	Pp1s131_184V6;Pp1s75_141V6;Pp1s161_120V6;Pp1s85_113V6;Pp1s111_58V6;Pp1s259_76V6;Pp1s123_97V6;Pp1s4_490V6;Pp1s3_520V6;Pp1s13_430V6;Pp1s64_7V6;Pp1s90_50V6;Pp1s26_209V6;Pp1s259_69V6;Pp1s79_92V6;Pp1s60_65V6;Pp1s30_39V6;Pp1s29_125V6;Pp1s73_31V6;Pp1s30_255V6;Pp1s1_461V6;Pp1s103_80V6;Pp1s189_18V6;Pp1s31_50V6;Pp1s347_30V6;Pp1s21_259V6	Pp1s131_184V6=3.830435149;Pp1s75_141V6=5.763651771;Pp1s161_120V6=4.103778758;Pp1s85_113V6=2.405158327;Pp1s111_58V6=-2.463946901;Pp1s259_76V6=6.759096367;Pp1s123_97V6=2.823750124;Pp1s4_490V6=4.337045859;Pp1s3_520V6=3.896340943;Pp1s13_430V6=2.440523221;Pp1s64_7V6=3.429020933;Pp1s90_50V6=5.148586553;Pp1s26_209V6=2.764452035;Pp1s259_69V6=36.32648368;Pp1s79_92V6=2.411698359;Pp1s60_65V6=2.337210698;Pp1…	cellular_component	http://amigo.geneontology.org/cgi-bin/amigo/term_details?term=GO:0009543
	GO:0031977 thylakoid lumen	7.50188	52	20	AT1G06680;AT1G08550;AT1G54780;AT1G67090;AT1G67280;AT1G76100;AT1G76450;AT2G30950;AT3G01480;AT3G27925;AT3G50820;AT3G55330;AT4G02530;AT4G09010;AT4G21280;AT4G24930;AT5G23120;AT5G35100;AT5G39830;AT5G45680	3.63376e-13	6.21777e-12	Pp1s75_141V6;Pp1s161_120V6;Pp1s123_97V6;Pp1s66_48V6;Pp1s72_285V6;Pp1s3_520V6;Pp1s13_430V6;Pp1s178_66V6;Pp1s90_50V6;Pp1s79_92V6;Pp1s60_65V6;Pp1s30_39V6;Pp1s73_31V6;Pp1s30_255V6;Pp1s1_461V6;Pp1s103_80V6;Pp1s189_18V6;Pp1s396_19V6;Pp1s31_50V6;Pp1s347_30V6	Pp1s75_141V6=5.763651771;Pp1s161_120V6=4.103778758;Pp1s123_97V6=2.823750124;Pp1s66_48V6=39.93086364;Pp1s72_285V6=-2.485412424;Pp1s3_520V6=3.896340943;Pp1s13_430V6=2.440523221;Pp1s178_66V6=-3.19248744;Pp1s90_50V6=5.148586553;Pp1s79_92V6=2.411698359;Pp1s60_65V6=2.337210698;Pp1s30_39V6=4.013863247;Pp1s73_31V6=3.05282757;Pp1s30_255V6=4.364535823;Pp1s1_461V6=7.378068399;Pp1s103_80V6=4.830435149;Pp1s18…	cellular_component	http://amigo.geneontology.org/cgi-bin/amigo/term_details?term=GO:0031977
	GO:0009579 thylakoid	8.49256	209	91	AT1G02560;AT1G03130;AT1G03600;AT1G06680;AT1G07320;AT1G08380;AT1G12250;AT1G15140;AT1G15820;AT1G23740;AT1G30380;AT1G31330;AT1G32060;AT1G44575;AT1G52230;AT1G54780;AT1G55670;AT1G61520;AT1G64510;AT1G67090;AT1G67280;AT1G68590;AT1G76100;AT1G76450;AT1G78630;AT1G79040;AT2G05070;AT2G05100;AT2G20260;AT2G21170;AT2G23670;AT2G28000;AT2G28190;AT2G30950;AT2G33800;AT2G39730;AT2G42130;AT2G46820;AT3G01480;AT3G01500…	0	0	Pp1s212_7V6;Pp1s4_321V6;Pp1s131_184V6;Pp1s75_141V6;Pp1s196_122V6;Pp1s248_61V6;Pp1s85_113V6;Pp1s9_406V6;Pp1s28_319V6;Pp1s407_2V6;Pp1s74_135V6;Pp1s80_23V6;Pp1s20_273V6;Pp1s31_279V6;Pp1s89_62V6;Pp1s123_97V6;Pp1s83_246V6;Pp1s429_33V6;Pp1s359_29V6;Pp1s66_48V6;Pp1s72_285V6;Pp1s242_42V6;Pp1s3_520V6;Pp1s13_430V6;Pp1s152_173V6;Pp1s54_167V6;Pp1s252_28V6;Pp1s76_196V6;Pp1s334_17V6;Pp1s38_15V6;Pp1s64_7V6;Pp1s…	Pp1s212_7V6=2.017126157;Pp1s4_321V6=3.711972905;Pp1s131_184V6=3.830435149;Pp1s75_141V6=5.763651771;Pp1s196_122V6=5.438185725;Pp1s248_61V6=4.959889599;Pp1s85_113V6=2.405158327;Pp1s9_406V6=4.575418211;Pp1s28_319V6=4.22299433;Pp1s407_2V6=4.567400743;Pp1s74_135V6=4.555034232;Pp1s80_23V6=5.044126354;Pp1s20_273V6=3.518848998;Pp1s31_279V6=2.556725001;Pp1s89_62V6=4.6740016;Pp1s123_97V6=2.823750124;Pp1s83…	cellular_component	http://amigo.geneontology.org/cgi-bin/amigo/term_details?term=GO:0009579
	GO:0010319 stromule	11.0703	37	21	AT1G09340;AT1G23740;AT1G32060;AT1G42970;AT1G67280;AT1G70730;AT2G20890;AT2G39730;AT3G01500;AT3G12780;AT3G47520;AT3G54050;AT4G09650;AT4G31990;AT4G35090;AT4G37930;AT5G04590;AT5G06290;AT5G51820;AT5G54770;AT5G61410	1.11022e-16	2.97347e-15	Pp1s71_283V6;Pp1s407_2V6;Pp1s20_273V6;Pp1s86_156V6;Pp1s72_285V6;Pp1s4_12V6;Pp1s132_186V6;Pp1s258_44V6;Pp1s264_55V6;Pp1s201_82V6;Pp1s79_110V6;Pp1s20_373V6;Pp1s16_358V6;Pp1s540_7V6;Pp1s422_8V6;Pp1s21_270V6;Pp1s160_137V6;Pp1s30_345V6;Pp1s199_101V6;Pp1s94_94V6;Pp1s39_426V6	Pp1s71_283V6=3.397889655;Pp1s407_2V6=4.567400743;Pp1s20_273V6=3.518848998;Pp1s86_156V6=6.968776164;Pp1s72_285V6=-2.485412424;Pp1s4_12V6=3.927296688;Pp1s132_186V6=2.692346235;Pp1s258_44V6=2.100437426;Pp1s264_55V6=5.682238905;Pp1s201_82V6=9.013397425;Pp1s79_110V6=3.965364729;Pp1s20_373V6=4.18037762;Pp1s16_358V6=2.236666751;Pp1s540_7V6=3.066368048;Pp1s422_8V6=-2.005216812;Pp1s21_270V6=3.710863399;Pp…	cellular_component	http://amigo.geneontology.org/cgi-bin/amigo/term_details?term=GO:0010319
molecular function	GO:0005488 binding	1.58148	740	60	AT1G07280;AT1G09340;AT1G17100;AT1G26760;AT1G27760;AT1G30630;AT1G31730;AT1G33400;AT1G49670;AT1G49780;AT1G55480;AT1G80410;AT2G20360;AT2G20580;AT2G21280;AT2G22780;AT2G23910;AT2G25430;AT2G29670;AT2G32730;AT2G34460;AT2G40300;AT3G01980;AT3G02260;AT3G02360;AT3G06670;AT3G14110;AT3G17040;AT3G29360;AT3G42050;AT3G46540;AT3G47520;AT3G51680;AT3G55580;AT3G55640;AT3G56130;AT3G57890;AT3G58180;AT3G60350;AT4G17260…	0.000334398	0.00145063	Pp1s173_49V6;Pp1s71_283V6;Pp1s60_274V6;Pp1s98_145V6;Pp1s192_88V6;Pp1s54_149V6;Pp1s70_147V6;Pp1s12_184V6;Pp1s138_42V6;Pp1s198_49V6;Pp1s20_130V6;Pp1s201_47V6;Pp1s79_105V6;Pp1s3_553V6;Pp1s87_131V6;Pp1s39_428V6;Pp1s39_342V6;Pp1s7_214V6;Pp1s45_106V6;Pp1s44_155V6;Pp1s1_295V6;Pp1s51_217V6;Pp1s5_358V6;Pp1s31_210V6;Pp1s66_184V6;Pp1s112_103V6;Pp1s39_367V6;Pp1s43_234V6;Pp1s49_270V6;Pp1s21_158V6;Pp1s540_10V6…	Pp1s173_49V6=-3.270649463;Pp1s71_283V6=3.397889655;Pp1s60_274V6=-3.858002511;Pp1s98_145V6=2.017316809;Pp1s192_88V6=3.951944213;Pp1s54_149V6=4.199161914;Pp1s70_147V6=-4.596877695;Pp1s12_184V6=-35.96935124;Pp1s138_42V6=-2.491083031;Pp1s198_49V6=2.679369175;Pp1s20_130V6=4.501417629;Pp1s201_47V6=-2.915053655;Pp1s79_105V6=-4.941525867;Pp1s3_553V6=-2.744833956;Pp1s87_131V6=4.865829055;Pp1s39_428V6=3.49…	molecular_function	http://amigo.geneontology.org/cgi-bin/amigo/term_details?term=GO:0005488
	GO:0003824 catalytic activity	1.71492	1035	91	AT1G02000;AT1G09340;AT1G09780;AT1G11820;AT1G12050;AT1G30910;AT1G48420;AT1G49670;AT1G55320;AT1G56500;AT1G60550;AT1G62640;AT1G64660;AT1G67410;AT1G69740;AT1G76130;AT1G77670;AT1G78570;AT2G02390;AT2G13840;AT2G20260;AT2G20340;AT2G20360;AT2G21280;AT2G22780;AT2G23910;AT2G25620;AT2G26000;AT2G32750;AT2G33700;AT2G34460;AT2G43400;AT2G45290;AT3G01980;AT3G02360;AT3G13450;AT3G16190;AT3G16560;AT3G19630;AT3G23770…	3.94788e-07	3.68469e-06	Pp1s11_253V6;Pp1s71_283V6;Pp1s215_24V6;Pp1s301_24V6;Pp1s142_144V6;Pp1s9_36V6;Pp1s224_46V6;Pp1s138_42V6;Pp1s402_38V6;Pp1s71_244V6;Pp1s174_47V6;Pp1s119_22V6;Pp1s2_113V6;Pp1s237_53V6;Pp1s450_21V6;Pp1s526_11V6;Pp1s14_332V6;Pp1s88_1V6;Pp1s355_45V6;Pp1s180_52V6;Pp1s334_17V6;Pp1s102_63V6;Pp1s79_105V6;Pp1s87_131V6;Pp1s39_428V6;Pp1s39_342V6;Pp1s77_280V6;Pp1s40_296V6;Pp1s3_407V6;Pp1s84_221V6;Pp1s1_295V6;Pp…	Pp1s11_253V6=3.456505207;Pp1s71_283V6=3.397889655;Pp1s215_24V6=3.997343933;Pp1s301_24V6=5.928838853;Pp1s142_144V6=2.728325532;Pp1s9_36V6=-2.310493717;Pp1s224_46V6=3.234551362;Pp1s138_42V6=-2.491083031;Pp1s402_38V6=-3.789522773;Pp1s71_244V6=4.080841946;Pp1s174_47V6=37.13216203;Pp1s119_22V6=2.267020429;Pp1s2_113V6=-5.131214123;Pp1s237_53V6=-2.359838498;Pp1s450_21V6=2.185754797;Pp1s526_11V6=-4.38513…	molecular_function	http://amigo.geneontology.org/cgi-bin/amigo/term_details?term=GO:0003824
	GO:0005525 GTP binding	2.38488	229	28	AT1G06220;AT1G07410;AT1G14830;AT1G18070;AT1G33970;AT1G48900;AT1G50920;AT1G53900;AT1G56050;AT1G80770;AT2G22870;AT2G31680;AT3G13870;AT3G46060;AT3G47450;AT3G51290;AT3G52750;AT3G54840;AT3G62290;AT4G02080;AT4G17170;AT4G39520;AT5G08650;AT5G14670;AT5G27540;AT5G45130;AT5G55190;AT5G59840	1.92812e-05	0.000118772	Pp1s214_36V6;Pp1s84_180V6;Pp1s162_162V6;Pp1s54_148V6;Pp1s1_337V6;Pp1s26_93V6;Pp1s49_47V6;Pp1s96_37V6;Pp1s53_123V6;Pp1s139_50V6;Pp1s204_50V6;Pp1s348_29V6;Pp1s132_189V6;Pp1s113_159V6;Pp1s2_53V6;Pp1s15_49V6;Pp1s80_60V6;Pp1s543_3V6;Pp1s70_131V6;Pp1s7_338V6;Pp1s215_29V6;Pp1s26_115V6;Pp1s6_407V6;Pp1s70_130V6;Pp1s95_108V6;Pp1s117_91V6;Pp1s29_119V6;Pp1s218_87V6	Pp1s214_36V6=-2.150112488;Pp1s84_180V6=3.680525953;Pp1s162_162V6=5.525060471;Pp1s54_148V6=-2.931183922;Pp1s1_337V6=-2.827996921;Pp1s26_93V6=2.40859912;Pp1s49_47V6=-6.814354626;Pp1s96_37V6=2.060942389;Pp1s53_123V6=2.867668055;Pp1s139_50V6=-3.867525285;Pp1s204_50V6=-2.610074998;Pp1s348_29V6=2.194846575;Pp1s132_189V6=-6.625222321;Pp1s113_159V6=3.365605226;Pp1s2_53V6=2.195370334;Pp1s15_49V6=-35.70400…	molecular_function	http://amigo.geneontology.org/cgi-bin/amigo/term_details?term=GO:0005525
	GO:0005507 copper ion binding	3.02816	219	34	AT1G06330;AT1G15140;AT1G22840;AT1G24360;AT1G50940;AT1G56070;AT1G61570;AT1G66200;AT1G67090;AT1G71040;AT1G76100;AT1G79440;AT2G19940;AT2G28190;AT2G31050;AT2G32300;AT2G36530;AT3G04120;AT3G10920;AT3G45770;AT3G55010;AT4G05390;AT4G13940;AT4G26780;AT4G33680;AT5G03300;AT5G04590;AT5G13490;AT5G17920;AT5G20720;AT5G21105;AT5G23250;AT5G26330;AT5G63400	8.03625e-09	9.16728e-08	Pp1s57_24V6;Pp1s9_406V6;Pp1s109_97V6;Pp1s33_206V6;Pp1s206_83V6;Pp1s138_81V6;Pp1s168_35V6;Pp1s241_33V6;Pp1s66_48V6;Pp1s40_48V6;Pp1s3_520V6;Pp1s6_180V6;Pp1s101_184V6;Pp1s131_71V6;Pp1s57_155V6;Pp1s227_44V6;Pp1s1_527V6;Pp1s49_96V6;Pp1s174_60V6;Pp1s171_158V6;Pp1s53_111V6;Pp1s131_175V6;Pp1s20_229V6;Pp1s162_167V6;Pp1s37_113V6;Pp1s74_140V6;Pp1s160_137V6;Pp1s434_8V6;Pp1s33_110V6;Pp1s553_2V6;Pp1s308_11V6;P…	Pp1s57_24V6=-3.267132744;Pp1s9_406V6=4.575418211;Pp1s109_97V6=2.221704482;Pp1s33_206V6=2.698399272;Pp1s206_83V6=-2.615986518;Pp1s138_81V6=2.178271942;Pp1s168_35V6=3.515561812;Pp1s241_33V6=6.178971232;Pp1s66_48V6=39.93086364;Pp1s40_48V6=2.819165797;Pp1s3_520V6=3.896340943;Pp1s6_180V6=-3.048441071;Pp1s101_184V6=4.1497893;Pp1s131_71V6=2.265538271;Pp1s57_155V6=4.380402228;Pp1s227_44V6=6.882239413;Pp1…	molecular_function	http://amigo.geneontology.org/cgi-bin/amigo/term_details?term=GO:0005507
	GO:0003743 translation initiation factor activity	3.25082	90	15	AT1G10840;AT1G17220;AT1G53900;AT1G54290;AT2G23350;AT2G39990;AT2G40290;AT3G13920;AT3G26400;AT3G57290;AT4G20980;AT4G30690;AT5G11900;AT5G36230;AT5G54760	5.04482e-05	0.000267897	Pp1s240_23V6;Pp1s59_148V6;Pp1s96_37V6;Pp1s4_134V6;Pp1s257_72V6;Pp1s31_343V6;Pp1s55_319V6;Pp1s31_150V6;Pp1s112_236V6;Pp1s73_26V6;Pp1s91_180V6;Pp1s150_85V6;Pp1s70_238V6;Pp1s545_8V6;Pp1s23_225V6	Pp1s240_23V6=-4.292023114;Pp1s59_148V6=2.873941701;Pp1s96_37V6=2.060942389;Pp1s4_134V6=-3.380651422;Pp1s257_72V6=-2.299717506;Pp1s31_343V6=-3.867525285;Pp1s55_319V6=-3.003647579;Pp1s31_150V6=-3.674045556;Pp1s112_236V6=3.400301786;Pp1s73_26V6=-2.32003749;Pp1s91_180V6=2.183544899;Pp1s150_85V6=3.18037762;Pp1s70_238V6=2.145936975;Pp1s545_8V6=2.171536798;Pp1s23_225V6=-2.619597772	molecular_function	http://amigo.geneontology.org/cgi-bin/amigo/term_details?term=GO:0003743
	GO:0003735 structural constituent of ribosome	4.51233	402	93	AT1G05190;AT1G07320;AT1G07830;AT1G08360;AT1G15250;AT1G25260;AT1G26880;AT1G26910;AT1G27400;AT1G29070;AT1G41880;AT1G48350;AT1G57660;AT1G61580;AT1G64510;AT1G68590;AT1G70600;AT1G74270;AT1G74970;AT1G75350;AT1G77940;AT1G78630;AT1G79850;AT2G17360;AT2G19730;AT2G19740;AT2G24090;AT2G32060;AT2G33450;AT2G33800;AT2G34480;AT2G36170;AT2G36620;AT2G37190;AT2G38140;AT2G43030;AT2G47110;AT3G04400;AT3G05560;AT3G05590…	0	0	Pp1s138_83V6;Pp1s196_122V6;Pp1s65_268V6;Pp1s40_297V6;Pp1s152_133V6;Pp1s138_84V6;Pp1s200_25V6;Pp1s447_11V6;Pp1s364_56V6;Pp1s27_326V6;Pp1s45_64V6;Pp1s97_12V6;Pp1s1_780V6;Pp1s154_134V6;Pp1s359_29V6;Pp1s242_42V6;Pp1s400_20V6;Pp1s1_549V6;Pp1s128_49V6;Pp1s378_8V6;Pp1s91_111V6;Pp1s152_173V6;Pp1s11_275V6;Pp1s39_422V6;Pp1s98_65V6;Pp1s28_306V6;Pp1s324_20V6;Pp1s26_289V6;Pp1s229_21V6;Pp1s61_236V6;Pp1s5_178V6…	Pp1s138_83V6=2.481251234;Pp1s196_122V6=5.438185725;Pp1s65_268V6=2.474378376;Pp1s40_297V6=-3.32003749;Pp1s152_133V6=-3.482094248;Pp1s138_84V6=-2.516504279;Pp1s200_25V6=2.448217612;Pp1s447_11V6=3.541394105;Pp1s364_56V6=2.198518762;Pp1s27_326V6=3.448769559;Pp1s45_64V6=4.178358452;Pp1s97_12V6=4.429645747;Pp1s1_780V6=3.001479131;Pp1s154_134V6=2.22471644;Pp1s359_29V6=3.58046709;Pp1s242_42V6=5.952154872…	molecular_function	http://amigo.geneontology.org/cgi-bin/amigo/term_details?term=GO:0003735
	GO:0015450 P-P-bond-hydrolysis-driven protein transmembrane transporter activity	5.08823	46	12	AT1G21650;AT1G61570;AT2G28800;AT2G28900;AT2G42210;AT3G46740;AT4G14870;AT4G16160;AT4G24920;AT5G43970;AT5G50460;AT5G50810	2.41836e-06	2.12816e-05	Pp1s338_68V6;Pp1s168_35V6;Pp1s381_17V6;Pp1s68_202V6;Pp1s317_70V6;Pp1s23_111V6;Pp1s22_325V6;Pp1s157_44V6;Pp1s3_513V6;Pp1s379_37V6;Pp1s376_32V6;Pp1s12_60V6	Pp1s338_68V6=-4.368536008;Pp1s168_35V6=3.515561812;Pp1s381_17V6=2.758913851;Pp1s68_202V6=3.337792306;Pp1s317_70V6=2.217751891;Pp1s23_111V6=-5.163918288;Pp1s22_325V6=4.346793836;Pp1s157_44V6=-2.20545469;Pp1s3_513V6=2.590969214;Pp1s379_37V6=4.233853565;Pp1s376_32V6=4.706976688;Pp1s12_60V6=2.199829983	molecular_function	http://amigo.geneontology.org/cgi-bin/amigo/term_details?term=GO:0015450
	GO:0016168 chlorophyll binding	6.09528	32	10	AT1G15820;AT1G44575;AT1G61520;AT2G05070;AT2G05100;AT3G08940;AT3G22840;AT3G54890;AT3G61470;AT4G10340	2.78524e-06	2.38293e-05	Pp1s28_319V6;Pp1s31_279V6;Pp1s429_33V6;Pp1s252_28V6;Pp1s76_196V6;Pp1s472_14V6;Pp1s371_45V6;Pp1s247_7V6;Pp1s651_2V6;Pp1s6_313V6	Pp1s28_319V6=4.22299433;Pp1s31_279V6=2.556725001;Pp1s429_33V6=3.55928168;Pp1s252_28V6=3.386026777;Pp1s76_196V6=5.650931171;Pp1s472_14V6=36.99867902;Pp1s371_45V6=4.178803866;Pp1s247_7V6=5.468382443;Pp1s651_2V6=3.667978818;Pp1s6_313V6=5.411237263	molecular_function	http://amigo.geneontology.org/cgi-bin/amigo/term_details?term=GO:0016168
	GO:0008137 NADH dehydrogenase (ubiquinone) activity	6.78431	23	8	AT1G79010;AT2G02510;AT3G06310;AT4G02580;AT5G08530;AT5G11770;AT5G37510;AT5G67590	1.1501e-05	7.8718e-05	Pp1s24_200V6;Pp1s83_49V6;Pp1s381_25V6;Pp1s36_321V6;Pp1s5_351V6;Pp1s224_39V6;Pp1s170_67V6;Pp1s101_162V6	Pp1s24_200V6=2.535680454;Pp1s83_49V6=2.377929743;Pp1s381_25V6=2.804209937;Pp1s36_321V6=-2.054983916;Pp1s5_351V6=-36.23238564;Pp1s224_39V6=2.900269701;Pp1s170_67V6=2.71487062;Pp1s101_162V6=3.611356663	molecular_function	http://amigo.geneontology.org/cgi-bin/amigo/term_details?term=GO:0008137
	GO:0008266 poly(U) RNA binding	7.18601	19	7	AT1G06680;AT1G07320;AT1G68010;AT3G50820;AT3G53460;AT4G15415;AT4G37930	2.68234e-05	0.000158877	Pp1s75_141V6;Pp1s196_122V6;Pp1s3_572V6;Pp1s60_65V6;Pp1s91_60V6;Pp1s34_256V6;Pp1s21_270V6	Pp1s75_141V6=5.763651771;Pp1s196_122V6=5.438185725;Pp1s3_572V6=2.721695648;Pp1s60_65V6=2.337210698;Pp1s91_60V6=4.664804312;Pp1s34_256V6=-2.606341675;Pp1s21_270V6=3.710863399	molecular_function	http://amigo.geneontology.org/cgi-bin/amigo/term_details?term=GO:0008266
	GO:0019843 rRNA binding	7.50188	13	5	AT1G05190;AT1G64510;AT3G17170;AT4G10450;AT5G17870	0.000320355	0.00140956	Pp1s138_83V6;Pp1s359_29V6;Pp1s36_299V6;Pp1s58_149V6;Pp1s74_226V6	Pp1s138_83V6=2.481251234;Pp1s359_29V6=3.58046709;Pp1s36_299V6=2.030953071;Pp1s58_149V6=2.131672281;Pp1s74_226V6=3.934242211	molecular_function	http://amigo.geneontology.org/cgi-bin/amigo/term_details?term=GO:0019843
	GO:0004028 3-chloroallyl aldehyde dehydrogenase activity	8.35924	14	6	AT1G23800;AT1G44170;AT1G54100;AT1G79440;AT2G24270;AT3G48000	3.78127e-05	0.000211751	Pp1s93_81V6;Pp1s90_226V6;Pp1s237_29V6;Pp1s6_180V6;Pp1s10_228V6;Pp1s496_1V6	Pp1s93_81V6=-2.651076003;Pp1s90_226V6=-2.707060613;Pp1s237_29V6=-2.627813077;Pp1s6_180V6=-3.048441071;Pp1s10_228V6=5.965364729;Pp1s496_1V6=-2.177323688	molecular_function	http://amigo.geneontology.org/cgi-bin/amigo/term_details?term=GO:0004028
	GO:0008121 ubiquinol-cytochrome-c reductase activity	9.75245	8	4	AT1G15120;AT3G10860;AT3G52730;AT5G05370	0.000407884	0.00167971	Pp1s491_11V6;Pp1s200_47V6;Pp1s136_187V6;Pp1s39_296V6	Pp1s491_11V6=2.058474133;Pp1s200_47V6=2.080841946;Pp1s136_187V6=2.746724442;Pp1s39_296V6=2.109754638	molecular_function	http://amigo.geneontology.org/cgi-bin/amigo/term_details?term=GO:0008121
	GO:0008943 glyceraldehyde-3-phosphate dehydrogenase activity	11.1457	7	4	AT1G12900;AT1G16300;AT1G42970;AT3G04120	0.000212594	0.000984644	Pp1s135_29V6;Pp1s309_73V6;Pp1s86_156V6;Pp1s49_96V6	Pp1s135_29V6=6.022654532;Pp1s309_73V6=2.435979576;Pp1s86_156V6=6.968776164;Pp1s49_96V6=-37.49942198	molecular_function	http://amigo.geneontology.org/cgi-bin/amigo/term_details?term=GO:0008943
	GO:0004556 alpha-amylase activity	12.1906	8	5	AT1G03310;AT1G76130;AT4G09020;AT4G25000;AT5G04360	1.73039e-05	0.000111033	Pp1s62_201V6;Pp1s526_11V6;Pp1s25_63V6;Pp1s223_59V6;Pp1s142_79V6	Pp1s62_201V6=-2.630167013;Pp1s526_11V6=-4.385132518;Pp1s25_63V6=2.548707134;Pp1s223_59V6=2.238186577;Pp1s142_79V6=-5.116784312	molecular_function	http://amigo.geneontology.org/cgi-bin/amigo/term_details?term=GO:0004556

## Sheet: 72h vs 48h
Go_Terms		Enrichment_factor	Allgenes_with_Go_annotation	DEGs_with_Go_annotation	ATH.Homologs	P.value	Q.value	Name	Name=logFC	Go_class	Links
biological process	GO:0009651 response to salt stress	2.20161	377	40	AT1G01060;AT1G01140;AT1G08830;AT1G10170;AT1G27320;AT1G27760;AT1G53240;AT1G65930;AT1G66200;AT1G66340;AT1G72370;AT1G78900;AT2G16500;AT2G26650;AT2G38710;AT2G47730;AT2G47770;AT3G01470;AT3G12390;AT3G25780;AT3G48330;AT3G60750;AT4G11150;AT4G11600;AT4G17260;AT4G31300;AT4G34110;AT4G38630;AT4G39260;AT5G01410;AT5G04590;AT5G09590;AT5G15650;AT5G23540;AT5G23860;AT5G35630;AT5G35750;AT5G37370;AT5G52660;AT5G62530	2.83925e-06	2.2547e-05	Pp1s325_68V6;Pp1s58_13V6;Pp1s44_277V6;Pp1s215_60V6;Pp1s71_181V6;Pp1s16_94V6;Pp1s201_6V6;Pp1s245_29V6;Pp1s241_33V6;Pp1s54_307V6;Pp1s173_16V6;Pp1s10_201V6;Pp1s41_319V6;Pp1s2_170V6;Pp1s47_221V6;Pp1s339_37V6;Pp1s403_10V6;Pp1s65_42V6;Pp1s156_120V6;Pp1s378_11V6;Pp1s53_43V6;Pp1s120_164V6;Pp1s269_14V6;Pp1s98_2V6;Pp1s235_138V6;Pp1s3_23V6;Pp1s51_110V6;Pp1s14_318V6;Pp1s123_58V6;Pp1s350_40V6;Pp1s47_171V6;Pp1…	Pp1s325_68V6=-36.57050675;Pp1s58_13V6=3.035096536;Pp1s44_277V6=5.058758218;Pp1s215_60V6=6.269962059;Pp1s71_181V6=3.712405716;Pp1s16_94V6=-2.220843656;Pp1s201_6V6=4.252823641;Pp1s245_29V6=2.534351409;Pp1s241_33V6=-4.172463134;Pp1s54_307V6=-2.094636901;Pp1s173_16V6=-2.001392385;Pp1s10_201V6=3.077558956;Pp1s41_319V6=-2.487951182;Pp1s2_170V6=-2.504825001;Pp1s47_221V6=2.061680595;Pp1s339_37V6=3.513038…	biological_process	http://amigo.geneontology.org/cgi-bin/amigo/term_details?term=GO:0009651
	GO:0006457 protein folding	2.65299	219	28	AT1G21080;AT1G55490;AT1G68370;AT1G75690;AT1G79930;AT1G80920;AT2G20560;AT2G26890;AT2G28000;AT2G29960;AT2G35795;AT3G01480;AT3G20050;AT3G60210;AT3G62190;AT4G26780;AT5G02500;AT5G06110;AT5G09590;AT5G12030;AT5G13120;AT5G22060;AT5G26360;AT5G45680;AT5G49840;AT5G49910;AT5G56000;AT5G59610	2.60917e-06	2.13478e-05	Pp1s403_3V6;Pp1s15_485V6;Pp1s63_91V6;Pp1s301_31V6;Pp1s40_190V6;Pp1s17_154V6;Pp1s83_34V6;Pp1s25_286V6;Pp1s114_95V6;Pp1s323_28V6;Pp1s157_85V6;Pp1s90_50V6;Pp1s39_248V6;Pp1s257_13V6;Pp1s65_185V6;Pp1s162_167V6;Pp1s97_279V6;Pp1s344_48V6;Pp1s59_242V6;Pp1s11_289V6;Pp1s82_98V6;Pp1s174_37V6;Pp1s56_219V6;Pp1s347_30V6;Pp1s2_151V6;Pp1s115_168V6;Pp1s83_80V6;Pp1s174_35V6	Pp1s403_3V6=2.085280803;Pp1s15_485V6=2.962780549;Pp1s63_91V6=3.276534713;Pp1s301_31V6=-2.783702476;Pp1s40_190V6=2.678396823;Pp1s17_154V6=2.913843749;Pp1s83_34V6=2.103984242;Pp1s25_286V6=3.281771361;Pp1s114_95V6=-3.440808508;Pp1s323_28V6=2.36771409;Pp1s157_85V6=2.539569119;Pp1s90_50V6=2.361801725;Pp1s39_248V6=36.15230411;Pp1s257_13V6=2.981359346;Pp1s65_185V6=-2.978756189;Pp1s162_167V6=4.139031189;…	biological_process	http://amigo.geneontology.org/cgi-bin/amigo/term_details?term=GO:0006457
	GO:0009611 response to wounding	2.76669	150	20	AT1G01140;AT1G19660;AT1G21610;AT1G55020;AT1G55480;AT1G65060;AT1G76680;AT1G76690;AT2G02990;AT2G20340;AT2G28290;AT2G28900;AT2G30490;AT2G33150;AT3G25230;AT4G08170;AT4G24220;AT4G39980;AT5G09810;AT5G14780	3.67402e-05	0.000230695	Pp1s58_13V6;Pp1s42_184V6;Pp1s133_33V6;Pp1s434_27V6;Pp1s20_130V6;Pp1s71_170V6;Pp1s326_44V6;Pp1s9_107V6;Pp1s358_60V6;Pp1s102_63V6;Pp1s360_39V6;Pp1s269_46V6;Pp1s298_4V6;Pp1s55_275V6;Pp1s109_70V6;Pp1s584_9V6;Pp1s12_260V6;Pp1s76_162V6;Pp1s381_18V6;Pp1s106_16V6	Pp1s58_13V6=3.035096536;Pp1s42_184V6=2.245196746;Pp1s133_33V6=-2.573866645;Pp1s434_27V6=2.088783129;Pp1s20_130V6=-4.4559154;Pp1s71_170V6=36.85661891;Pp1s326_44V6=4.202365759;Pp1s9_107V6=8.17024992;Pp1s358_60V6=-2.09941192;Pp1s102_63V6=-5.155078962;Pp1s360_39V6=2.506402255;Pp1s269_46V6=-3.628499371;Pp1s298_4V6=2.815701739;Pp1s55_275V6=-5.755912855;Pp1s109_70V6=2.46840809;Pp1s584_9V6=8.007915462;Pp…	biological_process	http://amigo.geneontology.org/cgi-bin/amigo/term_details?term=GO:0009611
	GO:0009409 response to cold	3.68536	259	46	AT1G01060;AT1G01140;AT1G03680;AT1G09340;AT1G23740;AT1G24620;AT1G27320;AT1G32060;AT1G42970;AT1G53240;AT1G55490;AT1G67090;AT1G67280;AT2G16500;AT2G18790;AT2G26640;AT2G28900;AT2G33800;AT2G39730;AT2G47730;AT3G01500;AT3G03050;AT3G11170;AT3G12780;AT3G17020;AT3G22840;AT3G23700;AT3G49910;AT3G54050;AT4G09650;AT4G11150;AT4G21150;AT4G25470;AT4G31990;AT4G34150;AT4G35090;AT4G36020;AT4G37930;AT4G39260;AT5G02500…	1.60982e-14	2.71658e-13	Pp1s325_68V6;Pp1s58_13V6;Pp1s317_45V6;Pp1s71_283V6;Pp1s407_2V6;Pp1s168_83V6;Pp1s71_181V6;Pp1s20_273V6;Pp1s86_156V6;Pp1s201_6V6;Pp1s15_485V6;Pp1s66_48V6;Pp1s72_285V6;Pp1s41_319V6;Pp1s164_65V6;Pp1s245_24V6;Pp1s269_46V6;Pp1s61_236V6;Pp1s5_83V6;Pp1s339_37V6;Pp1s264_55V6;Pp1s243_10V6;Pp1s65_6V6;Pp1s201_82V6;Pp1s1_365V6;Pp1s371_45V6;Pp1s98_143V6;Pp1s59_51V6;Pp1s20_373V6;Pp1s10_393V6;Pp1s269_14V6;Pp1s42…	Pp1s325_68V6=-36.57050675;Pp1s58_13V6=3.035096536;Pp1s317_45V6=-2.709183499;Pp1s71_283V6=-2.580656414;Pp1s407_2V6=-3.056234942;Pp1s168_83V6=4.095404257;Pp1s71_181V6=3.712405716;Pp1s20_273V6=-3.83740034;Pp1s86_156V6=-4.459873414;Pp1s201_6V6=4.252823641;Pp1s15_485V6=2.962780549;Pp1s66_48V6=-9.46675696;Pp1s72_285V6=3.291641605;Pp1s41_319V6=-2.487951182;Pp1s164_65V6=-3.997865012;Pp1s245_24V6=4.363397…	biological_process	http://amigo.geneontology.org/cgi-bin/amigo/term_details?term=GO:0009409
	GO:0009790 embryo development	4.09158	71	14	AT1G17730;AT1G31340;AT1G49770;AT2G28000;AT2G39990;AT3G16640;AT3G24650;AT3G54010;AT3G63190;AT4G16280;AT5G22370;AT5G27540;AT5G46290;AT5G62440	6.23669e-06	4.81116e-05	Pp1s406_15V6;Pp1s127_93V6;Pp1s1_263V6;Pp1s114_95V6;Pp1s31_343V6;Pp1s33_209V6;Pp1s143_82V6;Pp1s91_239V6;Pp1s185_119V6;Pp1s158_158V6;Pp1s152_51V6;Pp1s197_92V6;Pp1s56_233V6;Pp1s9_476V6	Pp1s406_15V6=3.167600341;Pp1s127_93V6=-3.440913237;Pp1s1_263V6=36.62905739;Pp1s114_95V6=-3.440808508;Pp1s31_343V6=5.023954665;Pp1s33_209V6=2.254283997;Pp1s143_82V6=3.158140012;Pp1s91_239V6=3.808057955;Pp1s185_119V6=2.150526828;Pp1s158_158V6=2.533310128;Pp1s152_51V6=4.506402255;Pp1s197_92V6=3.415648567;Pp1s56_233V6=2.014249564;Pp1s9_476V6=-2.541914319	biological_process	http://amigo.geneontology.org/cgi-bin/amigo/term_details?term=GO:0009790
	GO:0006412 translation	4.11387	459	91	AT1G05190;AT1G07320;AT1G15250;AT1G26910;AT1G29070;AT1G33140;AT1G34030;AT1G41880;AT1G48350;AT1G48830;AT1G52300;AT1G64510;AT1G68590;AT1G70600;AT1G72370;AT1G75350;AT1G77940;AT1G78630;AT1G79850;AT2G01250;AT2G13540;AT2G17360;AT2G19740;AT2G20060;AT2G32060;AT2G33450;AT2G33800;AT2G34480;AT2G36170;AT2G37270;AT2G38140;AT2G40010;AT2G40510;AT2G40590;AT2G42710;AT2G44860;AT3G01790;AT3G02080;AT3G03010;AT3G04400…	0	0	Pp1s138_83V6;Pp1s196_122V6;Pp1s3_512V6;Pp1s22_94V6;Pp1s27_326V6;Pp1s183_107V6;Pp1s14_433V6;Pp1s45_64V6;Pp1s232_82V6;Pp1s134_167V6;Pp1s475_18V6;Pp1s359_29V6;Pp1s242_42V6;Pp1s77_266V6;Pp1s173_16V6;Pp1s378_8V6;Pp1s50_55V6;Pp1s152_173V6;Pp1s11_275V6;Pp1s11_173V6;Pp1s41_19V6;Pp1s39_422V6;Pp1s58_106V6;Pp1s158_147V6;Pp1s26_289V6;Pp1s229_21V6;Pp1s61_236V6;Pp1s74_193V6;Pp1s284_11V6;Pp1s400_33V6;Pp1s258_80…	Pp1s138_83V6=-4.629520748;Pp1s196_122V6=-6.35615762;Pp1s3_512V6=-4.444326704;Pp1s22_94V6=-2.552130715;Pp1s27_326V6=-2.455106261;Pp1s183_107V6=3.017481892;Pp1s14_433V6=-2.409423785;Pp1s45_64V6=-2.855322248;Pp1s232_82V6=-6.337715015;Pp1s134_167V6=-2.199532907;Pp1s475_18V6=-3.616333316;Pp1s359_29V6=-3.28805012;Pp1s242_42V6=-7.169687049;Pp1s77_266V6=-3.22156127;Pp1s173_16V6=-2.001392385;Pp1s378_8V6=-…	biological_process	http://amigo.geneontology.org/cgi-bin/amigo/term_details?term=GO:0006412
	GO:0046686 response to cadmium ion	4.25004	332	68	AT1G01060;AT1G04510;AT1G13440;AT1G20630;AT1G29150;AT1G42970;AT1G48420;AT1G49760;AT1G53240;AT1G63770;AT1G65930;AT1G65980;AT1G68560;AT1G70730;AT1G76680;AT1G79930;AT2G01140;AT2G19480;AT2G19940;AT2G24200;AT2G30860;AT2G30870;AT2G33800;AT2G35840;AT2G43750;AT2G45290;AT3G06050;AT3G12500;AT3G12780;AT3G13110;AT3G13920;AT3G16640;AT3G18190;AT3G19170;AT3G20390;AT3G22200;AT3G22890;AT3G25230;AT3G25800;AT3G48000…	0	0	Pp1s325_68V6;Pp1s14_250V6;Pp1s353_25V6;Pp1s3_465V6;Pp1s115_82V6;Pp1s86_156V6;Pp1s224_46V6;Pp1s126_131V6;Pp1s201_6V6;Pp1s90_110V6;Pp1s245_29V6;Pp1s43_8V6;Pp1s80_200V6;Pp1s4_12V6;Pp1s326_44V6;Pp1s40_190V6;Pp1s475_27V6;Pp1s1_822V6;Pp1s101_184V6;Pp1s381_15V6;Pp1s66_172V6;Pp1s75_107V6;Pp1s61_236V6;Pp1s18_326V6;Pp1s17_59V6;Pp1s72_25V6;Pp1s31_128V6;Pp1s309_77V6;Pp1s201_82V6;Pp1s65_270V6;Pp1s31_150V6;Pp1…	Pp1s325_68V6=-36.57050675;Pp1s14_250V6=2.969954582;Pp1s353_25V6=2.49939278;Pp1s3_465V6=3.565564327;Pp1s115_82V6=3.139031189;Pp1s86_156V6=-4.459873414;Pp1s224_46V6=-2.015019733;Pp1s126_131V6=-2.738728348;Pp1s201_6V6=4.252823641;Pp1s90_110V6=5.503603621;Pp1s245_29V6=2.534351409;Pp1s43_8V6=-3.975144935;Pp1s80_200V6=-3.108524064;Pp1s4_12V6=-4.0607646;Pp1s326_44V6=4.202365759;Pp1s40_190V6=2.678396823;…	biological_process	http://amigo.geneontology.org/cgi-bin/amigo/term_details?term=GO:0046686
	GO:0042742 defense response to bacterium	4.27839	194	40	AT1G04510;AT1G08830;AT1G09340;AT1G10170;AT1G13440;AT1G27320;AT1G32060;AT1G52740;AT1G53240;AT1G59870;AT1G65930;AT1G66340;AT2G22240;AT2G25110;AT2G30860;AT2G37660;AT2G39730;AT2G43710;AT2G47730;AT3G01480;AT3G01500;AT3G16640;AT3G18165;AT3G27850;AT3G55800;AT3G63190;AT4G03280;AT4G09650;AT4G11150;AT4G23100;AT4G26850;AT4G31750;AT4G32260;AT4G37460;AT5G02500;AT5G14740;AT5G50850;AT5G52640;AT5G63840;AT5G64440	4.66294e-15	8.39329e-14	Pp1s14_250V6;Pp1s44_277V6;Pp1s71_283V6;Pp1s215_60V6;Pp1s353_25V6;Pp1s71_181V6;Pp1s20_273V6;Pp1s219_44V6;Pp1s201_6V6;Pp1s72_306V6;Pp1s245_29V6;Pp1s54_307V6;Pp1s267_10V6;Pp1s213_64V6;Pp1s66_172V6;Pp1s126_81V6;Pp1s5_83V6;Pp1s157_50V6;Pp1s339_37V6;Pp1s90_50V6;Pp1s264_55V6;Pp1s33_209V6;Pp1s78_33V6;Pp1s72_208V6;Pp1s41_162V6;Pp1s185_119V6;Pp1s112_169V6;Pp1s10_393V6;Pp1s269_14V6;Pp1s479_14V6;Pp1s9_179V6;…	Pp1s14_250V6=2.969954582;Pp1s44_277V6=5.058758218;Pp1s71_283V6=-2.580656414;Pp1s215_60V6=6.269962059;Pp1s353_25V6=2.49939278;Pp1s71_181V6=3.712405716;Pp1s20_273V6=-3.83740034;Pp1s219_44V6=2.556951197;Pp1s201_6V6=4.252823641;Pp1s72_306V6=3.171374786;Pp1s245_29V6=2.534351409;Pp1s54_307V6=-2.094636901;Pp1s267_10V6=-2.979484179;Pp1s213_64V6=3.987028096;Pp1s66_172V6=6.232404772;Pp1s126_81V6=-2.4434244…	biological_process	http://amigo.geneontology.org/cgi-bin/amigo/term_details?term=GO:0042742
	GO:0006633 fatty acid biosynthetic process	4.7325	57	13	AT1G62640;AT1G65290;AT1G74960;AT1G79750;AT2G05990;AT2G46210;AT3G05020;AT3G11170;AT4G23850;AT4G30950;AT5G10160;AT5G15530;AT5G52920	2.41156e-06	2.03476e-05	Pp1s119_22V6;Pp1s49_175V6;Pp1s159_47V6;Pp1s38_44V6;Pp1s99_59V6;Pp1s83_225V6;Pp1s69_154V6;Pp1s65_6V6;Pp1s218_19V6;Pp1s81_78V6;Pp1s196_99V6;Pp1s54_77V6;Pp1s205_25V6	Pp1s119_22V6=4.577424482;Pp1s49_175V6=-2.9198625;Pp1s159_47V6=36.20188614;Pp1s38_44V6=5.775017693;Pp1s99_59V6=4.696248699;Pp1s83_225V6=2.609507675;Pp1s69_154V6=-5.026160919;Pp1s65_6V6=-2.60916166;Pp1s218_19V6=-4.248333441;Pp1s81_78V6=35.86279749;Pp1s196_99V6=-2.674750002;Pp1s54_77V6=2.610133542;Pp1s205_25V6=4.019376873	biological_process	http://amigo.geneontology.org/cgi-bin/amigo/term_details?term=GO:0006633
	GO:0006096 glycolysis	5.07226	45	11	AT1G01090;AT1G12900;AT1G13440;AT1G16300;AT1G22170;AT1G42970;AT3G12780;AT3G52990;AT5G08570;AT5G52920;AT5G58330	6.99401e-06	5.2455e-05	Pp1s318_24V6;Pp1s135_29V6;Pp1s353_25V6;Pp1s309_73V6;Pp1s23_285V6;Pp1s86_156V6;Pp1s201_82V6;Pp1s170_89V6;Pp1s90_134V6;Pp1s205_25V6;Pp1s65_267V6	Pp1s318_24V6=-4.638680747;Pp1s135_29V6=-4.088183616;Pp1s353_25V6=2.49939278;Pp1s309_73V6=-2.161251912;Pp1s23_285V6=2.161057495;Pp1s86_156V6=-4.459873414;Pp1s201_82V6=-3.486768507;Pp1s170_89V6=-2.369895421;Pp1s90_134V6=-2.068725886;Pp1s205_25V6=4.019376873;Pp1s65_267V6=-6.340524548	biological_process	http://amigo.geneontology.org/cgi-bin/amigo/term_details?term=GO:0006096
	GO:0015979 photosynthesis	5.54947	86	23	AT1G03130;AT1G30380;AT1G31330;AT1G49975;AT1G52230;AT1G55670;AT1G61520;AT1G61800;AT1G67740;AT1G79040;AT2G05070;AT2G05100;AT2G06520;AT2G18790;AT2G20260;AT3G05410;AT3G54050;AT3G54890;AT4G09650;AT4G10340;AT4G12800;AT4G28660;AT5G54270	1.09351e-11	1.55394e-10	Pp1s4_321V6;Pp1s5_384V6;Pp1s345_25V6;Pp1s392_44V6;Pp1s206_11V6;Pp1s83_246V6;Pp1s429_33V6;Pp1s70_177V6;Pp1s455_8V6;Pp1s41_264V6;Pp1s23_96V6;Pp1s76_196V6;Pp1s249_53V6;Pp1s164_65V6;Pp1s334_17V6;Pp1s125_61V6;Pp1s20_373V6;Pp1s247_7V6;Pp1s10_393V6;Pp1s6_313V6;Pp1s54_165V6;Pp1s311_70V6;Pp1s254_3V6	Pp1s4_321V6=-4.097723761;Pp1s5_384V6=-2.885177539;Pp1s345_25V6=-4.516602168;Pp1s392_44V6=-3.057366024;Pp1s206_11V6=-3.720779204;Pp1s83_246V6=-6.359443559;Pp1s429_33V6=-2.87990735;Pp1s70_177V6=-2.129897715;Pp1s455_8V6=-2.574727014;Pp1s41_264V6=-4.287155899;Pp1s23_96V6=2.266550624;Pp1s76_196V6=-2.927357036;Pp1s249_53V6=-2.236158727;Pp1s164_65V6=-3.997865012;Pp1s334_17V6=-3.594462213;Pp1s125_61V6=-4…	biological_process	http://amigo.geneontology.org/cgi-bin/amigo/term_details?term=GO:0015979
	GO:0042254 ribosome biogenesis	6.13483	115	34	AT1G15250;AT1G29070;AT1G34030;AT1G41880;AT1G48350;AT1G48630;AT1G52300;AT1G64510;AT1G75350;AT2G19740;AT2G34480;AT2G40010;AT2G40510;AT2G40590;AT2G44860;AT3G06680;AT3G10950;AT3G15190;AT3G17170;AT3G44890;AT3G53430;AT4G18100;AT4G27090;AT5G02610;AT5G03850;AT5G13510;AT5G14320;AT5G27820;AT5G28060;AT5G39740;AT5G53070;AT5G56940;AT5G59240;AT5G65220	0	0	Pp1s3_512V6;Pp1s27_326V6;Pp1s14_433V6;Pp1s45_64V6;Pp1s232_82V6;Pp1s259_87V6;Pp1s475_18V6;Pp1s359_29V6;Pp1s378_8V6;Pp1s58_106V6;Pp1s74_193V6;Pp1s39_424V6;Pp1s375_10V6;Pp1s270_77V6;Pp1s343_39V6;Pp1s28_307V6;Pp1s14_193V6;Pp1s94_105V6;Pp1s36_299V6;Pp1s536_10V6;Pp1s104_128V6;Pp1s98_19V6;Pp1s83_247V6;Pp1s1_489V6;Pp1s279_27V6;Pp1s76_199V6;Pp1s258_19V6;Pp1s59_287V6;Pp1s13_236V6;Pp1s97_115V6;Pp1s29_55V6;P…	Pp1s3_512V6=-4.444326704;Pp1s27_326V6=-2.455106261;Pp1s14_433V6=-2.409423785;Pp1s45_64V6=-2.855322248;Pp1s232_82V6=-6.337715015;Pp1s259_87V6=2.058138064;Pp1s475_18V6=-3.616333316;Pp1s359_29V6=-3.28805012;Pp1s378_8V6=-6.179134987;Pp1s58_106V6=-5.263270322;Pp1s74_193V6=-2.254281539;Pp1s39_424V6=3.814352483;Pp1s375_10V6=-3.514043531;Pp1s270_77V6=-2.112952785;Pp1s343_39V6=2.118817968;Pp1s28_307V6=-2.…	biological_process	http://amigo.geneontology.org/cgi-bin/amigo/term_details?term=GO:0042254
	GO:0009773 photosynthetic electron transport in photosystem I	8.30007	15	6	AT1G15980;AT1G18730;AT1G55670;AT2G05620;AT3G54050;AT4G09650	4.25929e-05	0.000261365	Pp1s89_87V6;Pp1s127_94V6;Pp1s83_246V6;Pp1s16_274V6;Pp1s20_373V6;Pp1s10_393V6	Pp1s89_87V6=-2.151188046;Pp1s127_94V6=4.694847344;Pp1s83_246V6=-6.359443559;Pp1s16_274V6=-3.323218194;Pp1s20_373V6=-3.157959004;Pp1s10_393V6=-3.250779378	biological_process	http://amigo.geneontology.org/cgi-bin/amigo/term_details?term=GO:0009773
	GO:0010205 photoinhibition	11.5279	9	5	AT2G30950;AT3G03380;AT3G15850;AT3G50820;AT4G30950	2.76409e-05	0.000177691	Pp1s9_115V6;Pp1s237_5V6;Pp1s68_264V6;Pp1s421_3V6;Pp1s81_78V6	Pp1s9_115V6=3.910212499;Pp1s237_5V6=3.264562071;Pp1s68_264V6=-35.73247423;Pp1s421_3V6=-2.573221656;Pp1s81_78V6=35.86279749	biological_process	http://amigo.geneontology.org/cgi-bin/amigo/term_details?term=GO:0010205
	GO:0006164 purine nucleotide biosynthetic process	13.8334	6	4	AT1G09830;AT1G63660;AT3G21110;AT3G55010	7.45164e-05	0.000428073	Pp1s175_128V6;Pp1s8_124V6;Pp1s10_57V6;Pp1s53_111V6	Pp1s175_128V6=-2.692452004;Pp1s8_124V6=2.327149888;Pp1s10_57V6=2.315765749;Pp1s53_111V6=7.002403322	biological_process	http://amigo.geneontology.org/cgi-bin/amigo/term_details?term=GO:0006164
cellular component	GO:0005739 mitochondrion	2.32184	992	111	AT1G07940;AT1G10510;AT1G10760;AT1G13440;AT1G15120;AT1G18600;AT1G19580;AT1G20630;AT1G22840;AT1G23800;AT1G29310;AT1G32470;AT1G48420;AT1G49410;AT1G49880;AT1G53000;AT1G53240;AT1G54220;AT1G55860;AT1G59870;AT1G61570;AT1G65290;AT1G70650;AT1G72270;AT1G72990;AT1G79440;AT2G01140;AT2G14170;AT2G15620;AT2G21170;AT2G25840;AT2G26800;AT2G28000;AT2G33150;AT2G37410;AT2G38550;AT2G42450;AT2G43750;AT2G43950;AT2G45740…	0	0	Pp1s7_445V6;Pp1s69_146V6;Pp1s8_70V6;Pp1s353_25V6;Pp1s491_11V6;Pp1s12_189V6;Pp1s13_238V6;Pp1s3_465V6;Pp1s109_97V6;Pp1s93_81V6;Pp1s114_48V6;Pp1s272_32V6;Pp1s224_46V6;Pp1s252_26V6;Pp1s172_75V6;Pp1s31_106V6;Pp1s201_6V6;Pp1s78_56V6;Pp1s42_128V6;Pp1s72_306V6;Pp1s168_35V6;Pp1s49_175V6;Pp1s65_73V6;Pp1s22_50V6;Pp1s52_244V6;Pp1s111_161V6;Pp1s475_27V6;Pp1s27_198V6;Pp1s197_146V6;Pp1s61_72V6;Pp1s5_195V6;Pp1s1…	Pp1s7_445V6=-3.035339717;Pp1s69_146V6=4.548906983;Pp1s8_70V6=3.613317459;Pp1s353_25V6=2.49939278;Pp1s491_11V6=-2.083361232;Pp1s12_189V6=2.342058286;Pp1s13_238V6=-3.816026689;Pp1s3_465V6=3.565564327;Pp1s109_97V6=-2.037374549;Pp1s93_81V6=2.427302886;Pp1s114_48V6=2.291109226;Pp1s272_32V6=-3.096553511;Pp1s224_46V6=-2.015019733;Pp1s252_26V6=-2.546950476;Pp1s172_75V6=-2.607918494;Pp1s31_106V6=4.6506004…	cellular_component	http://amigo.geneontology.org/cgi-bin/amigo/term_details?term=GO:0005739
	GO:0005618 cell wall	2.50515	439	53	AT1G06220;AT1G13440;AT1G20630;AT1G34030;AT1G48830;AT1G53240;AT1G68560;AT1G78900;AT2G01250;AT2G02990;AT2G16430;AT2G30870;AT2G37270;AT2G39730;AT3G02080;AT3G09630;AT3G12780;AT3G13920;AT3G14240;AT3G16240;AT3G29090;AT3G48930;AT3G54420;AT4G03210;AT4G08950;AT4G13340;AT4G30690;AT4G34670;AT4G34980;AT4G39260;AT5G02500;AT5G03340;AT5G03850;AT5G09590;AT5G09810;AT5G10160;AT5G13870;AT5G15650;AT5G19730;AT5G19780…	8.85048e-10	1.07301e-08	Pp1s214_36V6;Pp1s353_25V6;Pp1s3_465V6;Pp1s14_433V6;Pp1s134_167V6;Pp1s201_6V6;Pp1s80_200V6;Pp1s10_201V6;Pp1s11_173V6;Pp1s358_60V6;Pp1s33_340V6;Pp1s75_107V6;Pp1s400_33V6;Pp1s5_83V6;Pp1s54_217V6;Pp1s10_102V6;Pp1s201_82V6;Pp1s31_150V6;Pp1s19_223V6;Pp1s101_226V6;Pp1s14_353V6;Pp1s21_269V6;Pp1s184_140V6;Pp1s346_19V6;Pp1s58_168V6;Pp1s96_30V6;Pp1s150_85V6;Pp1s80_113V6;Pp1s232_23V6;Pp1s123_58V6;Pp1s97_279V…	Pp1s214_36V6=2.673978152;Pp1s353_25V6=2.49939278;Pp1s3_465V6=3.565564327;Pp1s14_433V6=-2.409423785;Pp1s134_167V6=-2.199532907;Pp1s201_6V6=4.252823641;Pp1s80_200V6=-3.108524064;Pp1s10_201V6=3.077558956;Pp1s11_173V6=2.843255382;Pp1s358_60V6=-2.09941192;Pp1s33_340V6=2.142678966;Pp1s75_107V6=6.816870683;Pp1s400_33V6=-2.058926538;Pp1s5_83V6=-7.033604666;Pp1s54_217V6=3.611945174;Pp1s10_102V6=-4.6424473…	cellular_component	http://amigo.geneontology.org/cgi-bin/amigo/term_details?term=GO:0005618
	GO:0005773 vacuole	2.85117	524	72	AT1G02305;AT1G07080;AT1G09340;AT1G09960;AT1G18070;AT1G19450;AT1G19910;AT1G20260;AT1G20970;AT1G22060;AT1G22750;AT1G25570;AT1G32400;AT1G33140;AT1G47128;AT1G52280;AT1G52740;AT1G53210;AT1G59610;AT1G63770;AT1G66200;AT1G73650;AT1G78660;AT1G78900;AT2G01250;AT2G24200;AT2G26890;AT2G28900;AT2G30860;AT2G30870;AT2G34660;AT2G37970;AT2G39300;AT2G47650;AT3G05590;AT3G06530;AT3G09630;AT3G11130;AT3G11530;AT3G12500…	1.55431e-15	2.9976e-14	Pp1s79_128V6;Pp1s114_33V6;Pp1s71_283V6;Pp1s89_139V6;Pp1s54_148V6;Pp1s438_14V6;Pp1s45_97V6;Pp1s100_117V6;Pp1s223_23V6;Pp1s14_259V6;Pp1s167_126V6;Pp1s199_124V6;Pp1s54_192V6;Pp1s183_107V6;Pp1s49_32V6;Pp1s61_279V6;Pp1s219_44V6;Pp1s1_653V6;Pp1s426_19V6;Pp1s90_110V6;Pp1s241_33V6;Pp1s133_16V6;Pp1s26_236V6;Pp1s10_201V6;Pp1s11_173V6;Pp1s381_15V6;Pp1s25_286V6;Pp1s269_46V6;Pp1s66_172V6;Pp1s75_107V6;Pp1s352_…	Pp1s79_128V6=-4.845861919;Pp1s114_33V6=-2.42420654;Pp1s71_283V6=-2.580656414;Pp1s89_139V6=-4.140966225;Pp1s54_148V6=3.902139198;Pp1s438_14V6=2.048228252;Pp1s45_97V6=-3.355248645;Pp1s100_117V6=2.512723201;Pp1s223_23V6=37.20675189;Pp1s14_259V6=-3.838725737;Pp1s167_126V6=2.82737143;Pp1s199_124V6=2.144907755;Pp1s54_192V6=3.92448663;Pp1s183_107V6=3.017481892;Pp1s49_32V6=-2.552130715;Pp1s61_279V6=2.150…	cellular_component	http://amigo.geneontology.org/cgi-bin/amigo/term_details?term=GO:0005773
	GO:0048046 apoplast	3.18254	326	50	AT1G03680;AT1G09340;AT1G12900;AT1G23740;AT1G32060;AT1G42970;AT1G47128;AT1G47710;AT1G55490;AT1G63770;AT1G65930;AT1G66200;AT1G67090;AT1G68010;AT1G68560;AT2G13360;AT2G15620;AT2G21170;AT2G28000;AT2G30860;AT2G30870;AT2G37660;AT2G39730;AT2G43570;AT2G43750;AT3G01500;AT3G12780;AT3G16640;AT3G19170;AT3G54050;AT3G55800;AT4G03210;AT4G25000;AT4G31990;AT4G37930;AT5G02500;AT5G04140;AT5G04590;AT5G13870;AT5G14740…	4.32432e-13	6.86804e-12	Pp1s317_45V6;Pp1s71_283V6;Pp1s135_29V6;Pp1s407_2V6;Pp1s20_273V6;Pp1s86_156V6;Pp1s49_32V6;Pp1s61_265V6;Pp1s15_485V6;Pp1s90_110V6;Pp1s245_29V6;Pp1s241_33V6;Pp1s66_48V6;Pp1s414_8V6;Pp1s80_200V6;Pp1s369_6V6;Pp1s197_146V6;Pp1s61_72V6;Pp1s114_95V6;Pp1s66_172V6;Pp1s75_107V6;Pp1s126_81V6;Pp1s5_83V6;Pp1s171_80V6;Pp1s17_59V6;Pp1s264_55V6;Pp1s201_82V6;Pp1s33_209V6;Pp1s72_282V6;Pp1s20_373V6;Pp1s41_162V6;Pp1s…	Pp1s317_45V6=-2.709183499;Pp1s71_283V6=-2.580656414;Pp1s135_29V6=-4.088183616;Pp1s407_2V6=-3.056234942;Pp1s20_273V6=-3.83740034;Pp1s86_156V6=-4.459873414;Pp1s49_32V6=-2.552130715;Pp1s61_265V6=2.141019742;Pp1s15_485V6=2.962780549;Pp1s90_110V6=5.503603621;Pp1s245_29V6=2.534351409;Pp1s241_33V6=-4.172463134;Pp1s66_48V6=-9.46675696;Pp1s414_8V6=-5.028386957;Pp1s80_200V6=-3.108524064;Pp1s369_6V6=2.31391…	cellular_component	http://amigo.geneontology.org/cgi-bin/amigo/term_details?term=GO:0048046
	GO:0005774 vacuolar membrane	3.93622	427	81	AT1G08470;AT1G19450;AT1G19910;AT1G20260;AT1G21720;AT1G22840;AT1G30630;AT1G34030;AT1G48270;AT1G52280;AT1G53210;AT1G59870;AT1G61800;AT1G64650;AT1G65270;AT1G70330;AT1G73650;AT1G78900;AT2G01250;AT2G01970;AT2G05070;AT2G17360;AT2G24420;AT2G26890;AT2G30490;AT2G31140;AT2G33150;AT2G34480;AT2G34660;AT2G37270;AT2G39130;AT2G39970;AT2G43160;AT2G45260;AT2G47650;AT2G47730;AT3G05590;AT3G11130;AT3G12500;AT3G13772…	0	0	Pp1s55_90V6;Pp1s438_14V6;Pp1s45_97V6;Pp1s100_117V6;Pp1s130_217V6;Pp1s109_97V6;Pp1s54_149V6;Pp1s14_433V6;Pp1s78_150V6;Pp1s61_279V6;Pp1s1_653V6;Pp1s72_306V6;Pp1s70_177V6;Pp1s44_143V6;Pp1s47_175V6;Pp1s40_4V6;Pp1s133_16V6;Pp1s10_201V6;Pp1s11_173V6;Pp1s19_106V6;Pp1s23_96V6;Pp1s39_422V6;Pp1s4_93V6;Pp1s25_286V6;Pp1s298_4V6;Pp1s70_213V6;Pp1s55_275V6;Pp1s74_193V6;Pp1s352_50V6;Pp1s400_33V6;Pp1s32_181V6;Pp1…	Pp1s55_90V6=-2.65025544;Pp1s438_14V6=2.048228252;Pp1s45_97V6=-3.355248645;Pp1s100_117V6=2.512723201;Pp1s130_217V6=-2.990251828;Pp1s109_97V6=-2.037374549;Pp1s54_149V6=-4.323584686;Pp1s14_433V6=-2.409423785;Pp1s78_150V6=5.797128394;Pp1s61_279V6=2.150526828;Pp1s1_653V6=-4.133209782;Pp1s72_306V6=3.171374786;Pp1s70_177V6=-2.129897715;Pp1s44_143V6=-2.379294119;Pp1s47_175V6=2.572906303;Pp1s40_4V6=4.6701…	cellular_component	http://amigo.geneontology.org/cgi-bin/amigo/term_details?term=GO:0005774
	GO:0009536 plastid	4.36054	138	29	AT1G01090;AT1G10510;AT1G16300;AT1G32200;AT1G74960;AT2G02500;AT2G21280;AT2G29630;AT2G38550;AT2G43710;AT2G43750;AT2G43950;AT3G20390;AT4G01900;AT4G24460;AT4G31990;AT4G32400;AT5G04590;AT5G12860;AT5G14220;AT5G22790;AT5G23890;AT5G24690;AT5G33320;AT5G43970;AT5G53460;AT5G55610;AT5G56940;AT5G61670	1.63065e-11	2.20138e-10	Pp1s318_24V6;Pp1s69_146V6;Pp1s309_73V6;Pp1s136_120V6;Pp1s159_47V6;Pp1s211_107V6;Pp1s87_131V6;Pp1s88_47V6;Pp1s20_332V6;Pp1s157_50V6;Pp1s17_59V6;Pp1s1_534V6;Pp1s37_67V6;Pp1s13_387V6;Pp1s14_157V6;Pp1s540_7V6;Pp1s293_16V6;Pp1s47_171V6;Pp1s17_363V6;Pp1s45_76V6;Pp1s125_16V6;Pp1s335_17V6;Pp1s4_62V6;Pp1s9_113V6;Pp1s379_37V6;Pp1s79_140V6;Pp1s128_148V6;Pp1s38_249V6;Pp1s237_60V6	Pp1s318_24V6=-4.638680747;Pp1s69_146V6=4.548906983;Pp1s309_73V6=-2.161251912;Pp1s136_120V6=-2.009499712;Pp1s159_47V6=36.20188614;Pp1s211_107V6=-2.70944272;Pp1s87_131V6=-2.267785803;Pp1s88_47V6=-4.961953833;Pp1s20_332V6=5.386958703;Pp1s157_50V6=5.802213132;Pp1s17_59V6=-2.36611873;Pp1s1_534V6=-2.195248009;Pp1s37_67V6=-2.407460426;Pp1s13_387V6=-2.547893723;Pp1s14_157V6=3.850068882;Pp1s540_7V6=-4.246…	cellular_component	http://amigo.geneontology.org/cgi-bin/amigo/term_details?term=GO:0009536
	GO:0022625 cytosolic large ribosomal subunit	4.64804	125	28	AT1G15250;AT1G33140;AT1G41880;AT1G70600;AT1G77940;AT2G01250;AT2G19740;AT2G34480;AT2G36170;AT2G44860;AT3G04400;AT3G05560;AT3G05590;AT3G06680;AT3G09630;AT3G10950;AT3G49910;AT3G53430;AT3G62870;AT4G01310;AT4G15000;AT4G18100;AT4G27090;AT4G31985;AT4G36130;AT5G02610;AT5G39740;AT5G48760	7.16993e-12	1.07549e-10	Pp1s3_512V6;Pp1s183_107V6;Pp1s45_64V6;Pp1s77_266V6;Pp1s50_55V6;Pp1s11_173V6;Pp1s58_106V6;Pp1s74_193V6;Pp1s284_11V6;Pp1s343_39V6;Pp1s15_152V6;Pp1s39_81V6;Pp1s304_9V6;Pp1s28_307V6;Pp1s10_102V6;Pp1s14_193V6;Pp1s59_51V6;Pp1s104_128V6;Pp1s211_31V6;Pp1s358_49V6;Pp1s101_74V6;Pp1s98_19V6;Pp1s83_247V6;Pp1s89_150V6;Pp1s37_66V6;Pp1s1_489V6;Pp1s97_115V6;Pp1s75_223V6	Pp1s3_512V6=-4.444326704;Pp1s183_107V6=3.017481892;Pp1s45_64V6=-2.855322248;Pp1s77_266V6=-3.22156127;Pp1s50_55V6=2.966636307;Pp1s11_173V6=2.843255382;Pp1s58_106V6=-5.263270322;Pp1s74_193V6=-2.254281539;Pp1s284_11V6=-36.16022278;Pp1s343_39V6=2.118817968;Pp1s15_152V6=-4.234373123;Pp1s39_81V6=5.956654447;Pp1s304_9V6=2.343382073;Pp1s28_307V6=-2.261081933;Pp1s10_102V6=-4.642447319;Pp1s14_193V6=36.6434…	cellular_component	http://amigo.geneontology.org/cgi-bin/amigo/term_details?term=GO:0022625
	GO:0005840 ribosome	4.90162	254	60	AT1G07320;AT1G09340;AT1G15250;AT1G26910;AT1G29070;AT1G41880;AT1G48350;AT1G52300;AT1G64510;AT1G70600;AT1G75350;AT1G78630;AT2G19740;AT2G20060;AT2G33450;AT2G33800;AT2G34480;AT2G37270;AT2G38140;AT2G40010;AT2G40510;AT2G40590;AT2G42710;AT2G44860;AT3G01790;AT3G02080;AT3G04400;AT3G05560;AT3G06680;AT3G09630;AT3G10950;AT3G15190;AT3G17170;AT3G44590;AT3G44890;AT3G53430;AT3G54210;AT3G63490;AT4G15000;AT4G18100…	0	0	Pp1s196_122V6;Pp1s71_283V6;Pp1s3_512V6;Pp1s22_94V6;Pp1s27_326V6;Pp1s45_64V6;Pp1s232_82V6;Pp1s475_18V6;Pp1s359_29V6;Pp1s77_266V6;Pp1s378_8V6;Pp1s152_173V6;Pp1s58_106V6;Pp1s158_147V6;Pp1s229_21V6;Pp1s61_236V6;Pp1s74_193V6;Pp1s400_33V6;Pp1s258_80V6;Pp1s39_424V6;Pp1s375_10V6;Pp1s270_77V6;Pp1s94_163V6;Pp1s343_39V6;Pp1s347_31V6;Pp1s54_217V6;Pp1s15_152V6;Pp1s39_81V6;Pp1s28_307V6;Pp1s10_102V6;Pp1s14_193V…	Pp1s196_122V6=-6.35615762;Pp1s71_283V6=-2.580656414;Pp1s3_512V6=-4.444326704;Pp1s22_94V6=-2.552130715;Pp1s27_326V6=-2.455106261;Pp1s45_64V6=-2.855322248;Pp1s232_82V6=-6.337715015;Pp1s475_18V6=-3.616333316;Pp1s359_29V6=-3.28805012;Pp1s77_266V6=-3.22156127;Pp1s378_8V6=-6.179134987;Pp1s152_173V6=-2.543557395;Pp1s58_106V6=-5.263270322;Pp1s158_147V6=-2.485716178;Pp1s229_21V6=-3.000782495;Pp1s61_236V6=…	cellular_component	http://amigo.geneontology.org/cgi-bin/amigo/term_details?term=GO:0005840
	GO:0022626 cytosolic ribosome	5.59072	193	52	AT1G07320;AT1G20630;AT1G34030;AT1G48630;AT1G48830;AT1G52300;AT1G55490;AT1G66200;AT1G67090;AT1G70600;AT1G72370;AT1G77940;AT2G01250;AT2G19740;AT2G28000;AT2G32060;AT2G34480;AT2G37270;AT2G40010;AT3G02080;AT3G05560;AT3G09630;AT3G12390;AT3G44590;AT3G48930;AT3G49910;AT3G62870;AT4G01310;AT4G11150;AT4G15000;AT4G18100;AT4G25740;AT4G25890;AT4G27090;AT4G34670;AT4G35090;AT4G36130;AT4G37930;AT4G39200;AT5G02500…	0	0	Pp1s196_122V6;Pp1s3_465V6;Pp1s14_433V6;Pp1s259_87V6;Pp1s134_167V6;Pp1s475_18V6;Pp1s15_485V6;Pp1s241_33V6;Pp1s66_48V6;Pp1s77_266V6;Pp1s173_16V6;Pp1s50_55V6;Pp1s11_173V6;Pp1s58_106V6;Pp1s114_95V6;Pp1s26_289V6;Pp1s74_193V6;Pp1s400_33V6;Pp1s39_424V6;Pp1s54_217V6;Pp1s39_81V6;Pp1s10_102V6;Pp1s156_120V6;Pp1s409_34V6;Pp1s21_269V6;Pp1s59_51V6;Pp1s211_31V6;Pp1s358_49V6;Pp1s269_14V6;Pp1s101_74V6;Pp1s98_19V6…	Pp1s196_122V6=-6.35615762;Pp1s3_465V6=3.565564327;Pp1s14_433V6=-2.409423785;Pp1s259_87V6=2.058138064;Pp1s134_167V6=-2.199532907;Pp1s475_18V6=-3.616333316;Pp1s15_485V6=2.962780549;Pp1s241_33V6=-4.172463134;Pp1s66_48V6=-9.46675696;Pp1s77_266V6=-3.22156127;Pp1s173_16V6=-2.001392385;Pp1s50_55V6=2.966636307;Pp1s11_173V6=2.843255382;Pp1s58_106V6=-5.263270322;Pp1s114_95V6=-3.440808508;Pp1s26_289V6=-3.89…	cellular_component	http://amigo.geneontology.org/cgi-bin/amigo/term_details?term=GO:0022626
	GO:0010287 plastoglobule	5.88438	67	19	AT1G09340;AT1G31330;AT1G52230;AT1G61520;AT2G01140;AT2G05070;AT2G05100;AT2G20260;AT2G34460;AT2G39730;AT2G42130;AT3G26060;AT3G50820;AT3G54890;AT4G01150;AT4G09650;AT4G10340;AT4G12800;AT4G31390	2.22889e-10	2.86571e-09	Pp1s71_283V6;Pp1s345_25V6;Pp1s206_11V6;Pp1s429_33V6;Pp1s475_27V6;Pp1s23_96V6;Pp1s76_196V6;Pp1s334_17V6;Pp1s1_295V6;Pp1s5_83V6;Pp1s348_22V6;Pp1s95_45V6;Pp1s421_3V6;Pp1s247_7V6;Pp1s9_38V6;Pp1s10_393V6;Pp1s6_313V6;Pp1s54_165V6;Pp1s181_106V6	Pp1s71_283V6=-2.580656414;Pp1s345_25V6=-4.516602168;Pp1s206_11V6=-3.720779204;Pp1s429_33V6=-2.87990735;Pp1s475_27V6=-3.536704301;Pp1s23_96V6=2.266550624;Pp1s76_196V6=-2.927357036;Pp1s334_17V6=-3.594462213;Pp1s1_295V6=-3.142254921;Pp1s5_83V6=-7.033604666;Pp1s348_22V6=-2.45060461;Pp1s95_45V6=-3.043244915;Pp1s421_3V6=-2.573221656;Pp1s247_7V6=-3.57749216;Pp1s9_38V6=-4.144828865;Pp1s10_393V6=-3.250779…	cellular_component	http://amigo.geneontology.org/cgi-bin/amigo/term_details?term=GO:0010287
	GO:0009535 chloroplast thylakoid membrane	6.09909	313	92	AT1G03130;AT1G07320;AT1G12250;AT1G15980;AT1G18730;AT1G30380;AT1G31330;AT1G32060;AT1G33810;AT1G42970;AT1G44575;AT1G52220;AT1G52230;AT1G54500;AT1G55480;AT1G55670;AT1G61520;AT1G64510;AT1G65260;AT1G67090;AT1G67740;AT1G68590;AT1G73110;AT1G74470;AT1G74730;AT1G75690;AT1G79040;AT2G05070;AT2G05100;AT2G05620;AT2G06520;AT2G20260;AT2G21530;AT2G21970;AT2G23670;AT2G26500;AT2G27290;AT2G28800;AT2G30570;AT2G30950…	1.11022e-16	2.498e-15	Pp1s4_321V6;Pp1s196_122V6;Pp1s85_113V6;Pp1s89_87V6;Pp1s127_94V6;Pp1s5_384V6;Pp1s345_25V6;Pp1s20_273V6;Pp1s1_789V6;Pp1s86_156V6;Pp1s31_279V6;Pp1s15_328V6;Pp1s206_11V6;Pp1s59_328V6;Pp1s20_130V6;Pp1s83_246V6;Pp1s429_33V6;Pp1s359_29V6;Pp1s75_56V6;Pp1s66_48V6;Pp1s455_8V6;Pp1s242_42V6;Pp1s378_41V6;Pp1s20_284V6;Pp1s241_62V6;Pp1s301_31V6;Pp1s41_264V6;Pp1s23_96V6;Pp1s76_196V6;Pp1s16_274V6;Pp1s249_53V6;Pp1…	Pp1s4_321V6=-4.097723761;Pp1s196_122V6=-6.35615762;Pp1s85_113V6=-5.507554793;Pp1s89_87V6=-2.151188046;Pp1s127_94V6=4.694847344;Pp1s5_384V6=-2.885177539;Pp1s345_25V6=-4.516602168;Pp1s20_273V6=-3.83740034;Pp1s1_789V6=-4.268590654;Pp1s86_156V6=-4.459873414;Pp1s31_279V6=-3.328227864;Pp1s15_328V6=-3.164169698;Pp1s206_11V6=-3.720779204;Pp1s59_328V6=-3.227291025;Pp1s20_130V6=-4.4559154;Pp1s83_246V6=-6.3…	cellular_component	http://amigo.geneontology.org/cgi-bin/amigo/term_details?term=GO:0009535
	GO:0009941 chloroplast envelope	6.1388	409	121	AT1G01090;AT1G02560;AT1G03130;AT1G04420;AT1G05190;AT1G08640;AT1G09340;AT1G10510;AT1G10760;AT1G12900;AT1G15140;AT1G20630;AT1G23740;AT1G26910;AT1G31330;AT1G32060;AT1G32080;AT1G33140;AT1G33810;AT1G42970;AT1G48350;AT1G55480;AT1G55490;AT1G55670;AT1G59870;AT1G63770;AT1G65260;AT1G66200;AT1G67090;AT1G74470;AT1G75350;AT1G78900;AT1G79850;AT1G80300;AT1G80380;AT2G05070;AT2G05100;AT2G05990;AT2G21170;AT2G21280…	0	0	Pp1s318_24V6;Pp1s212_7V6;Pp1s4_321V6;Pp1s450_1V6;Pp1s138_83V6;Pp1s156_88V6;Pp1s71_283V6;Pp1s69_146V6;Pp1s8_70V6;Pp1s135_29V6;Pp1s9_406V6;Pp1s3_465V6;Pp1s407_2V6;Pp1s22_94V6;Pp1s345_25V6;Pp1s20_273V6;Pp1s63_96V6;Pp1s183_107V6;Pp1s1_789V6;Pp1s86_156V6;Pp1s232_82V6;Pp1s20_130V6;Pp1s15_485V6;Pp1s83_246V6;Pp1s72_306V6;Pp1s90_110V6;Pp1s75_56V6;Pp1s241_33V6;Pp1s66_48V6;Pp1s20_284V6;Pp1s378_8V6;Pp1s10_20…	Pp1s318_24V6=-4.638680747;Pp1s212_7V6=-2.354093564;Pp1s4_321V6=-4.097723761;Pp1s450_1V6=-2.459837546;Pp1s138_83V6=-4.629520748;Pp1s156_88V6=-2.104287071;Pp1s71_283V6=-2.580656414;Pp1s69_146V6=4.548906983;Pp1s8_70V6=3.613317459;Pp1s135_29V6=-4.088183616;Pp1s9_406V6=-3.077403777;Pp1s3_465V6=3.565564327;Pp1s407_2V6=-3.056234942;Pp1s22_94V6=-2.552130715;Pp1s345_25V6=-4.516602168;Pp1s20_273V6=-3.83740…	cellular_component	http://amigo.geneontology.org/cgi-bin/amigo/term_details?term=GO:0009941
	GO:0009570 chloroplast stroma	6.52	401	126	AT1G02560;AT1G03680;AT1G04420;AT1G05190;AT1G07320;AT1G09340;AT1G10500;AT1G10760;AT1G12900;AT1G15140;AT1G23740;AT1G32060;AT1G32200;AT1G42970;AT1G53520;AT1G53670;AT1G55480;AT1G55490;AT1G60950;AT1G63770;AT1G65260;AT1G67090;AT1G67280;AT1G70730;AT1G75330;AT1G75350;AT1G75690;AT1G78630;AT1G79850;AT1G80380;AT1G80480;AT1G80920;AT2G02500;AT2G05990;AT2G13360;AT2G15620;AT2G19940;AT2G21170;AT2G21530;AT2G28000…	1.11022e-16	2.498e-15	Pp1s212_7V6;Pp1s317_45V6;Pp1s450_1V6;Pp1s138_83V6;Pp1s196_122V6;Pp1s71_283V6;Pp1s34_187V6;Pp1s8_70V6;Pp1s135_29V6;Pp1s9_406V6;Pp1s407_2V6;Pp1s20_273V6;Pp1s136_120V6;Pp1s86_156V6;Pp1s67_154V6;Pp1s317_19V6;Pp1s20_130V6;Pp1s15_485V6;Pp1s146_120V6;Pp1s90_110V6;Pp1s75_56V6;Pp1s66_48V6;Pp1s72_285V6;Pp1s4_12V6;Pp1s189_99V6;Pp1s378_8V6;Pp1s301_31V6;Pp1s152_173V6;Pp1s11_275V6;Pp1s3_177V6;Pp1s31_130V6;Pp1s…	Pp1s212_7V6=-2.354093564;Pp1s317_45V6=-2.709183499;Pp1s450_1V6=-2.459837546;Pp1s138_83V6=-4.629520748;Pp1s196_122V6=-6.35615762;Pp1s71_283V6=-2.580656414;Pp1s34_187V6=2.905244691;Pp1s8_70V6=3.613317459;Pp1s135_29V6=-4.088183616;Pp1s9_406V6=-3.077403777;Pp1s407_2V6=-3.056234942;Pp1s20_273V6=-3.83740034;Pp1s136_120V6=-2.009499712;Pp1s86_156V6=-4.459873414;Pp1s67_154V6=3.022652005;Pp1s317_19V6=4.406…	cellular_component	http://amigo.geneontology.org/cgi-bin/amigo/term_details?term=GO:0009570
	GO:0009579 thylakoid	8.04193	209	81	AT1G02560;AT1G03130;AT1G03680;AT1G07320;AT1G08380;AT1G12250;AT1G15140;AT1G23740;AT1G30380;AT1G31330;AT1G32060;AT1G44575;AT1G52230;AT1G55670;AT1G61520;AT1G64510;AT1G67090;AT1G67280;AT1G68590;AT1G76100;AT1G78630;AT1G79040;AT2G05070;AT2G05100;AT2G05990;AT2G20260;AT2G21170;AT2G23670;AT2G28000;AT2G30860;AT2G30950;AT2G33800;AT2G37660;AT2G39730;AT2G42130;AT2G47730;AT3G01480;AT3G01500;AT3G06730;AT3G08940…	0	0	Pp1s212_7V6;Pp1s4_321V6;Pp1s317_45V6;Pp1s196_122V6;Pp1s248_61V6;Pp1s85_113V6;Pp1s9_406V6;Pp1s407_2V6;Pp1s5_384V6;Pp1s345_25V6;Pp1s20_273V6;Pp1s31_279V6;Pp1s206_11V6;Pp1s83_246V6;Pp1s429_33V6;Pp1s359_29V6;Pp1s66_48V6;Pp1s72_285V6;Pp1s242_42V6;Pp1s3_520V6;Pp1s152_173V6;Pp1s41_264V6;Pp1s23_96V6;Pp1s76_196V6;Pp1s99_59V6;Pp1s334_17V6;Pp1s61_72V6;Pp1s64_7V6;Pp1s114_95V6;Pp1s66_172V6;Pp1s9_115V6;Pp1s61_…	Pp1s212_7V6=-2.354093564;Pp1s4_321V6=-4.097723761;Pp1s317_45V6=-2.709183499;Pp1s196_122V6=-6.35615762;Pp1s248_61V6=-36.95121426;Pp1s85_113V6=-5.507554793;Pp1s9_406V6=-3.077403777;Pp1s407_2V6=-3.056234942;Pp1s5_384V6=-2.885177539;Pp1s345_25V6=-4.516602168;Pp1s20_273V6=-3.83740034;Pp1s31_279V6=-3.328227864;Pp1s206_11V6=-3.720779204;Pp1s83_246V6=-6.359443559;Pp1s429_33V6=-2.87990735;Pp1s359_29V6=-3.…	cellular_component	http://amigo.geneontology.org/cgi-bin/amigo/term_details?term=GO:0009579
	GO:0010319 stromule	11.7771	37	21	AT1G03680;AT1G09340;AT1G23740;AT1G32060;AT1G42970;AT1G55490;AT1G67280;AT1G70730;AT2G39730;AT2G47730;AT3G01500;AT3G12780;AT3G54050;AT4G09650;AT4G31990;AT4G35090;AT4G37930;AT5G04590;AT5G51820;AT5G54770;AT5G61410	1.11022e-16	2.498e-15	Pp1s317_45V6;Pp1s71_283V6;Pp1s407_2V6;Pp1s20_273V6;Pp1s86_156V6;Pp1s15_485V6;Pp1s72_285V6;Pp1s4_12V6;Pp1s5_83V6;Pp1s339_37V6;Pp1s264_55V6;Pp1s201_82V6;Pp1s20_373V6;Pp1s10_393V6;Pp1s540_7V6;Pp1s422_8V6;Pp1s21_270V6;Pp1s47_171V6;Pp1s199_101V6;Pp1s10_351V6;Pp1s39_426V6	Pp1s317_45V6=-2.709183499;Pp1s71_283V6=-2.580656414;Pp1s407_2V6=-3.056234942;Pp1s20_273V6=-3.83740034;Pp1s86_156V6=-4.459873414;Pp1s15_485V6=2.962780549;Pp1s72_285V6=3.291641605;Pp1s4_12V6=-4.0607646;Pp1s5_83V6=-7.033604666;Pp1s339_37V6=3.513038381;Pp1s264_55V6=-2.292472251;Pp1s201_82V6=-3.486768507;Pp1s20_373V6=-3.157959004;Pp1s10_393V6=-3.250779378;Pp1s540_7V6=-4.246933898;Pp1s422_8V6=2.4976288…	cellular_component	http://amigo.geneontology.org/cgi-bin/amigo/term_details?term=GO:0010319
molecular function	GO:0003824 catalytic activity	1.86451	1035	93	AT1G02000;AT1G07080;AT1G09340;AT1G17890;AT1G22170;AT1G30080;AT1G48420;AT1G52920;AT1G55320;AT1G55880;AT1G60550;AT1G62640;AT1G63380;AT1G63450;AT1G63660;AT1G64660;AT1G72990;AT1G74790;AT1G76130;AT1G78570;AT2G02390;AT2G20260;AT2G20340;AT2G21280;AT2G22780;AT2G23970;AT2G25100;AT2G26000;AT2G26640;AT2G29630;AT2G33255;AT2G33700;AT2G34460;AT2G35840;AT2G43980;AT2G45290;AT2G47650;AT3G03080;AT3G10340;AT3G16560…	6.02716e-09	6.25897e-08	Pp1s11_253V6;Pp1s114_33V6;Pp1s71_283V6;Pp1s293_87V6;Pp1s23_285V6;Pp1s7_53V6;Pp1s224_46V6;Pp1s213_122V6;Pp1s402_38V6;Pp1s359_40V6;Pp1s174_47V6;Pp1s119_22V6;Pp1s40_188V6;Pp1s36_237V6;Pp1s8_124V6;Pp1s2_113V6;Pp1s52_244V6;Pp1s49_22V6;Pp1s526_11V6;Pp1s195_8V6;Pp1s355_45V6;Pp1s334_17V6;Pp1s102_63V6;Pp1s87_131V6;Pp1s38_300V6;Pp1s184_47V6;Pp1s336_13V6;Pp1s40_296V6;Pp1s245_24V6;Pp1s88_47V6;Pp1s26_22V6;Pp1…	Pp1s11_253V6=-3.815393233;Pp1s114_33V6=-2.42420654;Pp1s71_283V6=-2.580656414;Pp1s293_87V6=-2.929846589;Pp1s23_285V6=2.161057495;Pp1s7_53V6=3.18493369;Pp1s224_46V6=-2.015019733;Pp1s213_122V6=4.489528436;Pp1s402_38V6=5.546111965;Pp1s359_40V6=3.562200093;Pp1s174_47V6=-2.713859039;Pp1s119_22V6=4.577424482;Pp1s40_188V6=4.144267837;Pp1s36_237V6=3.926727585;Pp1s8_124V6=2.327149888;Pp1s2_113V6=2.65678473…	molecular_function	http://amigo.geneontology.org/cgi-bin/amigo/term_details?term=GO:0003824
	GO:0005488 binding	1.87873	740	67	AT1G03060;AT1G09340;AT1G17890;AT1G27760;AT1G30630;AT1G55480;AT1G63380;AT1G70650;AT1G72820;AT1G79190;AT2G01600;AT2G05170;AT2G19480;AT2G20580;AT2G21280;AT2G22125;AT2G22780;AT2G25430;AT2G26890;AT2G31660;AT2G34460;AT2G37970;AT2G39970;AT2G43160;AT2G45720;AT3G02710;AT3G03080;AT3G06670;AT3G08800;AT3G11130;AT3G13445;AT3G14110;AT3G15180;AT3G17040;AT3G46540;AT3G54010;AT3G56130;AT3G56460;AT3G57090;AT4G00231…	6.26202e-07	5.63582e-06	Pp1s72_227V6;Pp1s71_283V6;Pp1s293_87V6;Pp1s16_94V6;Pp1s54_149V6;Pp1s20_130V6;Pp1s40_188V6;Pp1s65_73V6;Pp1s43_27V6;Pp1s92_91V6;Pp1s17_213V6;Pp1s88_37V6;Pp1s1_822V6;Pp1s3_553V6;Pp1s87_131V6;Pp1s71_240V6;Pp1s38_300V6;Pp1s7_214V6;Pp1s25_286V6;Pp1s203_56V6;Pp1s1_295V6;Pp1s18_223V6;Pp1s90_152V6;Pp1s32_324V6;Pp1s150_137V6;Pp1s294_1V6;Pp1s269_47V6;Pp1s112_103V6;Pp1s28_194V6;Pp1s7_102V6;Pp1s246_34V6;Pp1s3…	Pp1s72_227V6=-2.344360328;Pp1s71_283V6=-2.580656414;Pp1s293_87V6=-2.929846589;Pp1s16_94V6=-2.220843656;Pp1s54_149V6=-4.323584686;Pp1s20_130V6=-4.4559154;Pp1s40_188V6=4.144267837;Pp1s65_73V6=2.719547785;Pp1s43_27V6=-2.003926765;Pp1s92_91V6=4.865239615;Pp1s17_213V6=3.242408929;Pp1s88_37V6=3.788482416;Pp1s1_822V6=3.157581585;Pp1s3_553V6=2.622031279;Pp1s87_131V6=-2.267785803;Pp1s71_240V6=36.16235777;…	molecular_function	http://amigo.geneontology.org/cgi-bin/amigo/term_details?term=GO:0005488
	GO:0005507 copper ion binding	3.03199	219	32	AT1G06330;AT1G08830;AT1G13440;AT1G15140;AT1G22840;AT1G53240;AT1G61570;AT1G65930;AT1G66200;AT1G67090;AT1G76100;AT1G79440;AT2G05990;AT2G14170;AT2G19940;AT2G30860;AT2G30870;AT2G31050;AT2G32300;AT2G37660;AT3G55010;AT3G63190;AT4G05390;AT4G13940;AT4G15940;AT4G26780;AT4G33680;AT5G04590;AT5G20720;AT5G21105;AT5G23250;AT5G26330	2.27216e-08	2.19101e-07	Pp1s167_116V6;Pp1s44_277V6;Pp1s353_25V6;Pp1s9_406V6;Pp1s109_97V6;Pp1s201_6V6;Pp1s168_35V6;Pp1s245_29V6;Pp1s241_33V6;Pp1s66_48V6;Pp1s3_520V6;Pp1s111_161V6;Pp1s99_59V6;Pp1s27_198V6;Pp1s101_184V6;Pp1s66_172V6;Pp1s75_107V6;Pp1s57_155V6;Pp1s77_277V6;Pp1s126_81V6;Pp1s53_111V6;Pp1s185_119V6;Pp1s131_175V6;Pp1s20_229V6;Pp1s14_264V6;Pp1s162_167V6;Pp1s37_113V6;Pp1s47_171V6;Pp1s300_1V6;Pp1s144_8V6;Pp1s79_181…	Pp1s167_116V6=3.402065595;Pp1s44_277V6=5.058758218;Pp1s353_25V6=2.49939278;Pp1s9_406V6=-3.077403777;Pp1s109_97V6=-2.037374549;Pp1s201_6V6=4.252823641;Pp1s168_35V6=-2.614449492;Pp1s245_29V6=2.534351409;Pp1s241_33V6=-4.172463134;Pp1s66_48V6=-9.46675696;Pp1s3_520V6=-2.850838714;Pp1s111_161V6=5.586757307;Pp1s99_59V6=4.696248699;Pp1s27_198V6=2.677700038;Pp1s101_184V6=-2.14868119;Pp1s66_172V6=6.2324047…	molecular_function	http://amigo.geneontology.org/cgi-bin/amigo/term_details?term=GO:0005507
	GO:0003743 translation initiation factor activity	3.2278	90	14	AT1G10840;AT1G49760;AT2G04520;AT2G39990;AT3G10330;AT3G13920;AT3G26400;AT3G60240;AT4G30690;AT4G34110;AT5G18110;AT5G20920;AT5G25780;AT5G36230	9.97537e-05	0.000528108	Pp1s240_23V6;Pp1s126_131V6;Pp1s312_76V6;Pp1s31_343V6;Pp1s147_86V6;Pp1s31_150V6;Pp1s112_236V6;Pp1s96_133V6;Pp1s150_85V6;Pp1s51_110V6;Pp1s6_173V6;Pp1s93_178V6;Pp1s138_36V6;Pp1s545_8V6	Pp1s240_23V6=5.346924041;Pp1s126_131V6=-2.738728348;Pp1s312_76V6=2.13260492;Pp1s31_343V6=5.023954665;Pp1s147_86V6=3.472454923;Pp1s31_150V6=3.467160623;Pp1s112_236V6=-2.251706064;Pp1s96_133V6=3.699047333;Pp1s150_85V6=-2.241790595;Pp1s51_110V6=3.079876874;Pp1s6_173V6=2.323760599;Pp1s93_178V6=3.697889936;Pp1s138_36V6=3.428217883;Pp1s545_8V6=2.154319313	molecular_function	http://amigo.geneontology.org/cgi-bin/amigo/term_details?term=GO:0003743
	GO:0015450 P-P-bond-hydrolysis-driven protein transmembrane transporter activity	4.51091	46	10	AT1G29310;AT1G61570;AT2G28800;AT2G28900;AT2G37410;AT3G27080;AT4G14870;AT4G24920;AT5G43970;AT5G50460	5.4466e-05	0.000319692	Pp1s114_48V6;Pp1s168_35V6;Pp1s198_153V6;Pp1s269_46V6;Pp1s303_21V6;Pp1s15_226V6;Pp1s22_325V6;Pp1s3_513V6;Pp1s379_37V6;Pp1s376_32V6	Pp1s114_48V6=2.291109226;Pp1s168_35V6=-2.614449492;Pp1s198_153V6=4.252417922;Pp1s269_46V6=-3.628499371;Pp1s303_21V6=3.151129332;Pp1s15_226V6=2.242061651;Pp1s22_325V6=-2.59502281;Pp1s3_513V6=-2.833447748;Pp1s379_37V6=-4.062820454;Pp1s376_32V6=-5.500193552	molecular_function	http://amigo.geneontology.org/cgi-bin/amigo/term_details?term=GO:0015450
	GO:0050897 cobalt ion binding	4.61115	45	10	AT1G20630;AT1G48420;AT1G65290;AT1G71310;AT1G79750;AT3G03100;AT3G22200;AT4G35090;AT5G62530;AT5G67590	4.45372e-05	0.000267223	Pp1s3_465V6;Pp1s224_46V6;Pp1s49_175V6;Pp1s249_94V6;Pp1s38_44V6;Pp1s15_384V6;Pp1s355_46V6;Pp1s422_8V6;Pp1s41_177V6;Pp1s101_162V6	Pp1s3_465V6=3.565564327;Pp1s224_46V6=-2.015019733;Pp1s49_175V6=-2.9198625;Pp1s249_94V6=-3.559094663;Pp1s38_44V6=5.775017693;Pp1s15_384V6=-3.962173305;Pp1s355_46V6=3.271278987;Pp1s422_8V6=2.497628861;Pp1s41_177V6=4.146226691;Pp1s101_162V6=-3.233279095	molecular_function	http://amigo.geneontology.org/cgi-bin/amigo/term_details?term=GO:0050897
	GO:0003735 structural constituent of ribosome	4.64556	402	90	AT1G05190;AT1G07320;AT1G15250;AT1G26910;AT1G29070;AT1G33140;AT1G34030;AT1G41880;AT1G48350;AT1G48830;AT1G52300;AT1G64510;AT1G68590;AT1G70600;AT1G72370;AT1G75350;AT1G77940;AT1G78630;AT1G79850;AT2G01250;AT2G17360;AT2G19740;AT2G20060;AT2G32060;AT2G33450;AT2G33800;AT2G34480;AT2G36170;AT2G37270;AT2G38140;AT2G40010;AT2G40510;AT2G40590;AT2G42710;AT2G44860;AT2G47110;AT3G01790;AT3G02080;AT3G04400;AT3G05560…	0	0	Pp1s138_83V6;Pp1s196_122V6;Pp1s3_512V6;Pp1s22_94V6;Pp1s27_326V6;Pp1s183_107V6;Pp1s14_433V6;Pp1s45_64V6;Pp1s232_82V6;Pp1s134_167V6;Pp1s475_18V6;Pp1s359_29V6;Pp1s242_42V6;Pp1s77_266V6;Pp1s173_16V6;Pp1s378_8V6;Pp1s50_55V6;Pp1s152_173V6;Pp1s11_275V6;Pp1s11_173V6;Pp1s39_422V6;Pp1s58_106V6;Pp1s158_147V6;Pp1s26_289V6;Pp1s229_21V6;Pp1s61_236V6;Pp1s74_193V6;Pp1s284_11V6;Pp1s400_33V6;Pp1s258_80V6;Pp1s39_42…	Pp1s138_83V6=-4.629520748;Pp1s196_122V6=-6.35615762;Pp1s3_512V6=-4.444326704;Pp1s22_94V6=-2.552130715;Pp1s27_326V6=-2.455106261;Pp1s183_107V6=3.017481892;Pp1s14_433V6=-2.409423785;Pp1s45_64V6=-2.855322248;Pp1s232_82V6=-6.337715015;Pp1s134_167V6=-2.199532907;Pp1s475_18V6=-3.616333316;Pp1s359_29V6=-3.28805012;Pp1s242_42V6=-7.169687049;Pp1s77_266V6=-3.22156127;Pp1s173_16V6=-2.001392385;Pp1s378_8V6=-…	molecular_function	http://amigo.geneontology.org/cgi-bin/amigo/term_details?term=GO:0003735
	GO:0016168 chlorophyll binding	5.83599	32	9	AT1G44575;AT1G61520;AT2G05070;AT2G05100;AT2G21970;AT3G08940;AT3G22840;AT3G54890;AT4G10340	1.40074e-05	9.69742e-05	Pp1s31_279V6;Pp1s429_33V6;Pp1s23_96V6;Pp1s76_196V6;Pp1s15_146V6;Pp1s472_14V6;Pp1s371_45V6;Pp1s247_7V6;Pp1s6_313V6	Pp1s31_279V6=-3.328227864;Pp1s429_33V6=-2.87990735;Pp1s23_96V6=2.266550624;Pp1s76_196V6=-2.927357036;Pp1s15_146V6=-3.007325341;Pp1s472_14V6=-3.834132626;Pp1s371_45V6=-2.999589692;Pp1s247_7V6=-3.57749216;Pp1s6_313V6=-2.992056565	molecular_function	http://amigo.geneontology.org/cgi-bin/amigo/term_details?term=GO:0016168
	GO:0008266 poly(U) RNA binding	6.55269	19	6	AT1G07320;AT1G68010;AT3G50820;AT3G53460;AT4G15415;AT4G37930	0.000195494	0.000894632	Pp1s196_122V6;Pp1s414_8V6;Pp1s421_3V6;Pp1s91_60V6;Pp1s34_256V6;Pp1s21_270V6	Pp1s196_122V6=-6.35615762;Pp1s414_8V6=-5.028386957;Pp1s421_3V6=-2.573221656;Pp1s91_60V6=-2.645533624;Pp1s34_256V6=2.165528991;Pp1s21_270V6=-2.0885726	molecular_function	http://amigo.geneontology.org/cgi-bin/amigo/term_details?term=GO:0008266
	GO:0004673 protein histidine kinase activity	6.91672	15	5	AT1G27320;AT1G66340;AT2G18790;AT5G10720;AT5G35750	0.000516573	0.00178814	Pp1s71_181V6;Pp1s54_307V6;Pp1s164_65V6;Pp1s15_65V6;Pp1s343_34V6	Pp1s71_181V6=3.712405716;Pp1s54_307V6=-2.094636901;Pp1s164_65V6=-3.997865012;Pp1s15_65V6=-3.367321477;Pp1s343_34V6=-2.273941118	molecular_function	http://amigo.geneontology.org/cgi-bin/amigo/term_details?term=GO:0004673
	GO:0004028 3-chloroallyl aldehyde dehydrogenase activity	8.89293	14	6	AT1G23800;AT1G79440;AT2G14170;AT2G24270;AT3G48000;AT5G62530	2.66442e-05	0.000175462	Pp1s93_81V6;Pp1s111_161V6;Pp1s27_198V6;Pp1s10_228V6;Pp1s496_1V6;Pp1s41_177V6	Pp1s93_81V6=2.427302886;Pp1s111_161V6=5.586757307;Pp1s27_198V6=2.677700038;Pp1s10_228V6=-4.182896906;Pp1s496_1V6=3.539136202;Pp1s41_177V6=4.146226691	molecular_function	http://amigo.geneontology.org/cgi-bin/amigo/term_details?term=GO:0004028
	GO:0019843 rRNA binding	9.577	13	6	AT1G05190;AT1G33140;AT1G64510;AT2G20060;AT3G17170;AT5G17870	1.58743e-05	0.000107152	Pp1s138_83V6;Pp1s183_107V6;Pp1s359_29V6;Pp1s158_147V6;Pp1s36_299V6;Pp1s74_226V6	Pp1s138_83V6=-4.629520748;Pp1s183_107V6=3.017481892;Pp1s359_29V6=-3.28805012;Pp1s158_147V6=-2.485716178;Pp1s36_299V6=-2.411715596;Pp1s74_226V6=-4.023899566	molecular_function	http://amigo.geneontology.org/cgi-bin/amigo/term_details?term=GO:0019843
	GO:0043130 ubiquitin binding	10.3751	8	4	AT1G19270;AT2G20580;AT2G26000;AT5G38470	0.000321621	0.00132576	Pp1s395_19V6;Pp1s3_553V6;Pp1s40_296V6;Pp1s3_105V6	Pp1s395_19V6=2.18447416;Pp1s3_553V6=2.622031279;Pp1s40_296V6=2.502370501;Pp1s3_105V6=-3.440119311	molecular_function	http://amigo.geneontology.org/cgi-bin/amigo/term_details?term=GO:0043130
	GO:0008943 glyceraldehyde-3-phosphate dehydrogenase activity	11.8572	7	4	AT1G12900;AT1G13440;AT1G16300;AT1G42970	0.000167208	0.000799047	Pp1s135_29V6;Pp1s353_25V6;Pp1s309_73V6;Pp1s86_156V6	Pp1s135_29V6=-4.088183616;Pp1s353_25V6=2.49939278;Pp1s309_73V6=-2.161251912;Pp1s86_156V6=-4.459873414	molecular_function	http://amigo.geneontology.org/cgi-bin/amigo/term_details?term=GO:0008943
	GO:0004614 phosphoglucomutase activity	15.5626	4	3	AT1G70730;AT5G18070;AT5G51820	0.000430703	0.0016495	Pp1s4_12V6;Pp1s211_20V6;Pp1s199_101V6	Pp1s4_12V6=-4.0607646;Pp1s211_20V6=2.640852455;Pp1s199_101V6=-4.177878831	molecular_function	http://amigo.geneontology.org/cgi-bin/amigo/term_details?term=GO:0004614
