# Supplementary material for: Transcriptome of Protoplasts Reprogrammed into Stem Cells in Physcomitrella patens
Source: PLoS One. 2012 Apr 24;7(4):e35961. doi: 10.1371/journal.pone.0035961 (PMC3335808; doi:10.1371/journal.pone.0035961)
Supplement: Table S6 — Complete gene list of each K-means cluster during protoplast reprogramming in P. patens . (XLS) [file pone.0035961.s011.xls]

## Sheet: clusster-1
#Gene	0h log2(TPM)	24h log2(TPM)	48h log2(TPM)	72h log2(TPM)		0h	24h	48h	72h	0h (TPM)	24h (TPM)	48h (TPM)	72h (TPM)	PFAM	Panther	KOG	KEGG ec	KEGG Orthology	best arabidopsis TAIR10 hit name	best arabidopsis TAIR10 hit symbol	best arabidopsis TAIR10 hit defline	best rice hit name	best rice hit symbol	best rice hit defline	Pathway	Go_terms
Pp1s15_182V6	1.83197	-0.870808	-0.730408	-2.75406		118	15	18	5	3.56022	0.546841	0.602733	0.148234	PF06026	PTHR11934	KOG3075	5.3.1.6	K01807	AT5G44520.1		NagB/RpiA/CoA transferase-like superfamily protein				Pentose phosphate pathway;Carbon fixation in photosynthetic organisms;Metabolic pathways;Biosynthesis of secondary metabolites	GO:0004751 ribose-5-phosphate isomerase activity;GO:0009052 "pentose-phosphate shunt, non-oxidative branch";GO:0009507 chloroplast
Pp1s165_105V6	2.83807	0.745863	-0.440902	-2.26863		237	46	22	7	7.15061	1.67698	0.736674	0.207527	PF00970,PF00175	PTHR19370	KOG0534	1.6.2.2	K00326	AT5G17770.1	CBR	NADH:cytochrome B5 reductase 1				Amino sugar and nucleotide sugar metabolism	GO:0009505 plant-type cell wall;GO:0005783 endoplasmic reticulum;GO:0004128 cytochrome-b5 reductase activity;GO:0005886 plasma membrane;GO:0004128 cytochrome-b5 reductase activity;GO:0022900 electron transport chain
Pp1s199_35V6	2.47289	0.176498	-0.376771	-0.988521		184	31	23	17	5.55153	1.13014	0.770159	0.503994	PF00226,PF01556	PTHR11821	KOG0714			AT2G20560.1		DNAJ heat shock family protein					GO:0006457 protein folding;GO:0006457 protein folding;GO:0031072 heat shock protein binding;GO:0051082 unfolded protein binding
Pp1s223_112V6	1.74374	-0.690236	-2.09298	-4.07598		111	17	7	2	3.34902	0.619753	0.234396	0.0592934	PF03641				K06966	AT3G53450.1		Putative lysine decarboxylase family protein					GO:0003674 molecular_function;GO:0005634 nucleus;GO:0005829 cytosol
Pp1s249_22V6	3.31565	1.08028	0.0996669	-3.07598		330	58	32	4	9.95655	2.11445	1.07153	0.118587	PF03171	PTHR10209	KOG0143			AT5G05600.1		2-oxoglutarate (2OG) and Fe(II)-dependent oxygenase superfamily protein					GO:0005506 iron ion binding;GO:0016491 oxidoreductase activity;GO:0080167 response to karrikin
Pp1s28_387V6	2.30688	-0.45577	-0.145446	-1.16909		164	20	27	15	4.9481	0.729121	0.9041	0.444701	PF07992,PF00070	PTHR22915	KOG2495	1.6.99.3	K03885	AT1G07180.1	NDA1	alternative NAD(P)H dehydrogenase 1					GO:0003954 NADH dehydrogenase activity;GO:0055114 oxidation-reduction process;GO:0003954 NADH dehydrogenase activity;GO:0005739 mitochondrion;GO:0031304 intrinsic to mitochondrial inner membrane
Pp1s30_317V6	3.89769	1.54423	0.772092	-3.49102		494	80	51	3	14.9047	2.91648	1.70774	0.0889402
Pp1s35_242V6	2.50391	-2.19274	-0.81287	-3.07598		188	6	17	4	5.67222	0.218736	0.569248	0.118587	PF08263,PF00560,PF00059	PTHR23258				AT1G12040.1	LRX1	leucine-rich repeat/extensin 1					GO:0009927 histidine phosphotransfer kinase activity;GO:0000904 cell morphogenesis involved in differentiation;GO:0009505 plant-type cell wall;GO:0009826 unidimensional cell growth;GO:0010054 trichoblast differentiation;GO:0005199 structural constituent of cell wall
Pp1s388_7V6	4.39847	0.837011	0.385069	-0.754055		699	49	39	20	21.0898	1.78635	1.30592	0.592934	PF07002,PF00097	PTHR10857	KOG4172			AT5G14420.3	RGLG2	RING domain ligase2					GO:0004842 ubiquitin-protein ligase activity;GO:0005886 plasma membrane;GO:0009690 cytokinin metabolic process;GO:0009850 auxin metabolic process
Pp1s6_146V6	2.20671	-0.870808	-1.19989	-3.32193		153	15	13	0	4.61622	0.546841	0.435307	0	PF00012	PTHR19375	KOG0102		K03283	AT5G49910.1	CPHSC70-2EAT SHOCK PROTEIN 70-2	chloroplast heat shock protein 70-2				Spliceosome;Protein processing in endoplasmic reticulum;Endocytosis	GO:0006457 protein folding;GO:0009408 response to heat;GO:0009532 plastid stroma;GO:0009941 chloroplast envelope;GO:0009507 chloroplast;GO:0009570 chloroplast stroma;GO:0046686 response to cadmium ion;GO:0009579 thylakoid;GO:0009532 plastid stroma;GO:0009507 chloroplast;GO:0048046 apoplast;GO:0009570 chloroplast stroma;GO:0005515 protein binding;GO:0005515 protein binding;GO:0005515 protein bindi…
Pp1s68_88V6	2.80107	-0.0772588	-0.376771	-1.49102		231	26	23	12	6.96959	0.947857	0.770159	0.355761	PF07723	PTHR23125	KOG1947			AT1G47056.1	VFB1	VIER F-box proteine 1					GO:0004842 ubiquitin-protein ligase activity
Pp1s9_366V6	2.40876	-0.607773	0.0538632	-0.906058		176	18	31	18	5.31016	0.656209	1.03804	0.533641		PTHR12317				AT1G54570.1		Esterase/lipase/thioesterase family protein					GO:0003824 catalytic activity;GO:0016747 "transferase activity, transferring acyl groups other than amino-acyl groups";GO:0010287 plastoglobule;GO:0010287 plastoglobule;GO:0010287 plastoglobule;GO:0009507 chloroplast
Pp1s97_59V6	5.51443	2.43175	0.22895	-3.32193		1515	148	35	0	45.7096	5.39549	1.17198	0	PF00190,PF07883					AT1G02335.1	GL22	germin-like protein subfamily 2 member 2 precursor					GO:0012505 endomembrane system;GO:0030145 manganese ion binding;GO:0045735 nutrient reservoir activity;GO:0048046 apoplast
Pp1s100_119V6	2.78853	-0.254137	-0.199893	-1.49102		229	23	26	12	6.90924	0.838489	0.870615	0.355761						AT2G03440.1	NRP1	nodulin-related protein 1					GO:0003674 molecular_function;GO:0005575 cellular_component;GO:0009617 response to bacterium;GO:0009408 response to heat;GO:0009408 response to heat;GO:0009409 response to cold;GO:0009738 abscisic acid mediated signaling pathway
Pp1s108_185V6	1.67724	-1.60777	-1.57841	-3.32193		106	9	10	0	3.19816	0.328104	0.334852	0
Pp1s114_31V6	2.37559	0.0296564	-0.145446	-2.49102		172	28	27	6	5.18947	1.02077	0.9041	0.17788	PF00365	PTHR13697		2.7.1.11	K00850	AT2G22480.1	PFK5	phosphofructokinase 5				Glycolysis / Gluconeogenesis;Pentose phosphate pathway;Fructose and mannose metabolism;Galactose metabolism;Metabolic pathways;Biosynthesis of secondary metabolites	GO:0003872 6-phosphofructokinase activity;GO:0005945 6-phosphofructokinase complex;GO:0006096 glycolysis;GO:0003872 6-phosphofructokinase activity;GO:0006096 glycolysis;GO:0009507 chloroplast
Pp1s12_390V6	2.84414	-1.7777	0.144061	-1.61655		238	8	33	11	7.18078	0.291648	1.10501	0.326114	PF00504	PTHR21649			K08912	AT2G05100.1	LHCB2.1	photosystem II light harvesting complex gene 2.1				Photosynthesis - antenna proteins;Metabolic pathways	GO:0015979 photosynthesis;GO:0016168 chlorophyll binding;GO:0030076 light-harvesting complex;GO:0009941 chloroplast envelope;GO:0009535 chloroplast thylakoid membrane;GO:0009507 chloroplast;GO:0009535 chloroplast thylakoid membrane;GO:0009535 chloroplast thylakoid membrane;GO:0010287 plastoglobule;GO:0016020 membrane;GO:0009507 chloroplast;GO:0009579 thylakoid;GO:0009637 response to blue light;GO…
Pp1s131_152V6	3.34164	1.33083	1.20819	-0.988521		336	69	69	17	10.1376	2.51547	2.31048	0.503994	PF02893	PTHR23319				AT1G02120.1	VAD1	GRAM domain family protein					GO:0042742 defense response to bacterium;GO:0043069 negative regulation of programmed cell death
Pp1s139_88V6	3.73068	-1.19274	-0.900333	-2.75406		440	12	16	5	13.2754	0.437472	0.535763	0.148234	PF00234,PF02162					AT3G22600.1		Bifunctional inhibitor/lipid-transfer protein/seed storage 2S albumin superfamily protein					GO:0006869 lipid transport;GO:0006869 lipid transport;GO:0008289 lipid binding;GO:0008289 lipid binding;GO:0031225 anchored to membrane;GO:0031225 anchored to membrane
Pp1s154_58V6	1.96055	-3.32193	-1.09298	-3.32193		129	0	14	0	3.89211	0	0.468793	0
Pp1s17_180V6	3.94085	-3.19274	-1.09298	-3.32193		509	3	14	0	15.3572	0.109368	0.468793	0	PF07732,PF00394,PF07731	PTHR11709	KOG1263			AT5G05390.1	LAC12	laccase 12					GO:0012505 endomembrane system;GO:0046274 lignin catabolic process;GO:0048046 apoplast;GO:0055114 oxidation-reduction process;GO:0008471 laccase activity
Pp1s179_14V6	4.04472	1.89473	1.18713	-4.07598		547	102	68	2	16.5037	3.71852	2.27699	0.0592934	PF00023	PTHR18958				AT3G58760.1		Integrin-linked protein kinase family					GO:0006468 protein phosphorylation;GO:0009966 regulation of signal transduction;GO:0016301 kinase activity;GO:0004712 protein serine/threonine/tyrosine kinase activity;GO:0005886 plasma membrane
Pp1s198_133V6	3.27125	0.266696	0.623229	-3.49102		320	33	46	3	9.65484	1.20305	1.54032	0.0889402	PF00069,PF07714	PTHR23258	KOG1187			AT1G49730.1		Protein kinase superfamily protein					GO:0006468 protein phosphorylation;GO:0006468 protein phosphorylation;GO:0006468 protein phosphorylation;GO:0006468 protein phosphorylation;GO:0016301 kinase activity;GO:0005886 plasma membrane;GO:0005886 plasma membrane;GO:0005886 plasma membrane;GO:0005886 plasma membrane
Pp1s199_57V6	5.48363	2.38217	2.08835	1.44758		1483	143	127	92	44.7441	5.21321	4.25262	2.7275	PF00069,PF00036	PTHR22982	KOG0032			AT2G17890.1	CPK16	calcium-dependent protein kinase 16					GO:0004672 protein kinase activity;GO:0004674 protein serine/threonine kinase activity;GO:0004683 calmodulin-dependent protein kinase activity;GO:0005509 calcium ion binding;GO:0005524 ATP binding;GO:0006468 protein phosphorylation;GO:0006468 protein phosphorylation
Pp1s21_54V6	2.30688	-1.97034	-1.90033	-4.07598		164	7	8	2	4.9481	0.255192	0.267882	0.0592934
Pp1s233_104V6	3.72411	-0.318267	0.385069	-3.32193		438	22	39	0	13.2151	0.802033	1.30592	0	PF08534,PF00578	PTHR10681	KOG0855			AT3G26060.1	ATPRX Q	Thioredoxin superfamily protein					GO:0016209 antioxidant activity;GO:0045454 cell redox homeostasis;GO:0045454 cell redox homeostasis;GO:0005515 protein binding;GO:0009941 chloroplast envelope;GO:0009507 chloroplast;GO:0009533 chloroplast stromal thylakoid;GO:0009535 chloroplast thylakoid membrane;GO:0010287 plastoglobule;GO:0010287 plastoglobule;GO:0009535 chloroplast thylakoid membrane;GO:0051920 peroxiredoxin activity;GO:00095…
Pp1s236_21V6	3.6288	0.681733	0.269592	-1.49102		410	44	36	12	12.3703	1.60407	1.20547	0.355761	PF00643,PF06203					AT3G07650.3	COL9	CONSTANS-like 9					GO:0008270 zinc ion binding;GO:0003700 sequence-specific DNA binding transcription factor activity;GO:0005634 nucleus;GO:0006355 "regulation of transcription, DNA-dependent";GO:0048579 "negative regulation of long-day photoperiodism, flowering";GO:0007623 circadian rhythm
Pp1s24_206V6	4.60217	2.10494	2.18713	-0.491021		805	118	136	24	24.2879	4.30181	4.55399	0.711521	PF04727	PTHR12771				AT3G03610.1		ELMO/CED-12 family protein					GO:0003674 molecular_function;GO:0006909 phagocytosis
Pp1s245_25V6	4.38187	0.837011	0.491984	-2.07598		691	49	42	8	20.8484	1.78635	1.40638	0.237174	PF00515,PF07719,PF04564	PTHR22904	KOG4642	6.3.2.19	K09561	AT3G07370.1	CHIP	carboxyl terminus of HSC70-interacting protein				Ubiquitin mediated proteolysis;Protein processing in endoplasmic reticulum	GO:0004842 ubiquitin-protein ligase activity;GO:0009266 response to temperature stimulus;GO:0009266 response to temperature stimulus;GO:0016567 protein ubiquitination;GO:0004842 ubiquitin-protein ligase activity;GO:0009651 response to salt stress;GO:0009737 response to abscisic acid stimulus;GO:0051087 chaperone binding
Pp1s252_12V6	3.46502	0.950222	1.52593	0.678904		366	53	86	54	11.0427	1.93217	2.87973	1.60092						AT5G38380.1							GO:0003674 molecular_function;GO:0008150 biological_process;GO:0016020 membrane;GO:0016020 membrane
Pp1s253_27V6	5.20907	2.28839	1.54261	0.538726		1226	134	87	49	36.9901	4.88511	2.91321	1.45269	PF00686,PF02446			2.4.1.25	K00705	AT2G40840.1	DPE2	disproportionating enzyme 2				Starch and sucrose metabolism;Metabolic pathways	GO:0004134 4-alpha-glucanotransferase activity;GO:0000023 maltose metabolic process;GO:0005829 cytosol;GO:0005983 starch catabolic process;GO:0005976 polysaccharide metabolic process;GO:0004134 4-alpha-glucanotransferase activity;GO:0010297 heteropolysaccharide binding;GO:0000025 maltose catabolic process;GO:0004134 4-alpha-glucanotransferase activity;GO:0004134 4-alpha-glucanotransferase activit…
Pp1s270_57V6	3.52297	0.0802825	1.47471	0.171944		381	29	83	38	11.4953	1.05723	2.77927	1.12658						AT1G71500.1		Rieske (2Fe-2S) domain-containing protein					GO:0016491 oxidoreductase activity;GO:0051537 "2 iron, 2 sulfur cluster binding";GO:0055114 oxidation-reduction process;GO:0009941 chloroplast envelope;GO:0009535 chloroplast thylakoid membrane;GO:0009507 chloroplast;GO:0009535 chloroplast thylakoid membrane;GO:0009535 chloroplast thylakoid membrane;GO:0009507 chloroplast
Pp1s271_68V6	4.77746	1.95022	-0.145446	-1.75406		909	106	27	10	27.4258	3.86434	0.9041	0.296467						AT5G21940.1							GO:0003674 molecular_function;GO:0008150 biological_process;GO:0005515 protein binding
Pp1s28_28V6	4.41897	2.10494	2.0304	0.316334		709	118	122	42	21.3915	4.30181	4.08519	1.24516	PF08392,PF02797,PF08541					AT1G19440.1	KCS4	3-ketoacyl-CoA synthase 4					GO:0003824 catalytic activity;GO:0016747 "transferase activity, transferring acyl groups other than amino-acyl groups";GO:0000038 very long-chain fatty acid metabolic process;GO:0042335 cuticle development
Pp1s280_8V6	1.88006	-1.97034	-2.09298	-2.75406		122	7	7	5	3.68091	0.255192	0.234396	0.148234	PF01715	PTHR11088	KOG1384	2.5.1.75	K00791	AT5G20040.1	IPT9	isopentenyltransferase 9				Zeatin biosynthesis;Metabolic pathways;Biosynthesis of secondary metabolites	GO:0005524 ATP binding;GO:0005524 ATP binding;GO:0005524 ATP binding;GO:0005524 ATP binding;GO:0008033 tRNA processing;GO:0052381 tRNA dimethylallyltransferase activity;GO:0009691 cytokinin biosynthetic process
Pp1s284_6V6	1.67724	-1.45577	-0.900333	-1.61655		106	10	16	11	3.19816	0.36456	0.535763	0.326114	PF07719,PF00515,PF00504	PTHR21649			K08911	AT1G45474.1	LHCA5	photosystem I light harvesting complex gene 5				Photosynthesis - antenna proteins	GO:0015979 photosynthesis;GO:0030076 light-harvesting complex;GO:0009535 chloroplast thylakoid membrane;GO:0009535 chloroplast thylakoid membrane;GO:0009782 photosystem I antenna complex;GO:0031409 pigment binding;GO:0009768 "photosynthesis, light harvesting in photosystem I";GO:0016020 membrane;GO:0016020 membrane;GO:0009507 chloroplast;GO:0009507 chloroplast
Pp1s288_52V6	1.78221	-0.45577	-2.31537	-4.07598		114	20	6	2	3.43954	0.729121	0.200911	0.0592934	PF03009	PTHR22958	KOG2421			AT3G02040.1	SRG3	senescence-related gene 3					GO:0006071 glycerol metabolic process;GO:0006071 glycerol metabolic process;GO:0006629 lipid metabolic process;GO:0008081 phosphoric diester hydrolase activity;GO:0008889 glycerophosphodiester phosphodiesterase activity;GO:0008889 glycerophosphodiester phosphodiesterase activity
Pp1s29_322V6	1.89184	-0.529771	-0.730408	-3.07598		123	19	18	4	3.71108	0.692665	0.602733	0.118587	PF03006	PTHR20855				AT4G37680.2	HHP4	heptahelical protein 4					GO:0016021 integral to membrane;GO:0016021 integral to membrane;GO:0004872 receptor activity;GO:0009725 response to hormone stimulus;GO:0009744 response to sucrose stimulus
Pp1s306_26V6	1.8073	-2.19274	-0.578405	-2.49102		116	6	20	6	3.49988	0.218736	0.669704	0.17788	PF00141			1.11.1.7	K00430	AT5G64120.1		Peroxidase superfamily protein				Phenylalanine metabolism;Phenylpropanoid biosynthesis;Metabolic pathways;Biosynthesis of secondary metabolites	GO:0004601 peroxidase activity;GO:0005618 cell wall;GO:0004601 peroxidase activity;GO:0005618 cell wall;GO:0045730 respiratory burst;GO:0050832 defense response to fungus;GO:0016020 membrane;GO:0048046 apoplast
Pp1s306_52V6	2.94368	0.392227	0.18713	-1.26863		255	36	34	14	7.6937	1.31242	1.1385	0.415054	PF00249					AT2G01060.1		myb-like HTH transcriptional regulator family protein					GO:0003700 sequence-specific DNA binding transcription factor activity;GO:0003700 sequence-specific DNA binding transcription factor activity;GO:0006355 "regulation of transcription, DNA-dependent"
Pp1s324_44V6	4.32219	1.30976	2.00656	1.49387		663	68	120	95	20.0036	2.47901	4.01822	2.81644						AT1G31940.1							GO:0005886 plasma membrane
Pp1s33_163V6	3.58232	1.28839	1.28949	0.567873		397	67	73	50	11.978	2.44255	2.44442	1.48234	PF00350,PF01926,PF01031,PF00169,PF02212	PTHR11566	KOG0446			AT1G59610.1	DL3	dynamin-like 3					GO:0003924 GTPase activity;GO:0005886 plasma membrane;GO:0005773 vacuole;GO:0005886 plasma membrane;GO:0005886 plasma membrane;GO:0005515 protein binding;GO:0005515 protein binding;GO:0005886 plasma membrane;GO:0030276 clathrin binding;GO:0045334 clathrin-coated endocytic vesicle;GO:0048488 synaptic vesicle endocytosis;GO:0009737 response to abscisic acid stimulus
Pp1s336_22V6	3.15878	-1.45577	0.18713	-2.26863		296	10	34	7	8.93072	0.36456	1.1385	0.207527						AT4G17600.1	LIL3:1	Chlorophyll A-B binding family protein					GO:0003700 sequence-specific DNA binding transcription factor activity;GO:0006355 "regulation of transcription, DNA-dependent";GO:0009535 chloroplast thylakoid membrane;GO:0009535 chloroplast thylakoid membrane;GO:0009507 chloroplast
Pp1s34_207V6	3.38395	1.35158	0.269592	-3.49102		346	70	36	3	10.4393	2.55192	1.20547	0.0889402		PTHR12603				AT3G48070.2		RING/U-box superfamily protein					GO:0008270 zinc ion binding;GO:0008270 zinc ion binding
Pp1s34_54V6	3.05785	0.176498	-0.315371	-1.61655		276	31	24	11	8.3273	1.13014	0.803645	0.326114	PF00686,PF01326	PTHR22931				AT5G26570.1	ATGWD3	catalytics;carbohydrate kinases;phosphoglucan, water dikinases					GO:0003824 catalytic activity;GO:0005975 carbohydrate metabolic process;GO:0009507 chloroplast;GO:0005983 starch catabolic process;GO:0009536 plastid;GO:0051752 "phosphoglucan, water dikinase activity";GO:0005982 starch metabolic process;GO:0009507 chloroplast;GO:0019200 carbohydrate kinase activity;GO:0046777 protein autophosphorylation;GO:0051752 "phosphoglucan, water dikinase activity";GO:0009…
Pp1s342_11V6	1.98275	-3.32193	-3.32193	-4.07598		131	0	0	2	3.95245	0	0	0.0592934
Pp1s345_10V6	2.16849	-3.19274	-0.145446	-1.37554		149	3	27	13	4.49553	0.109368	0.9041	0.385407	PF03951,PF00120	PTHR20852	KOG0683	6.3.1.2	K01915	AT5G16570.1	GLN1;4	glutamine synthetase 1;4				Alanine, aspartate and glutamate metabolism;Arginine and proline metabolism;Nitrogen metabolism;Metabolic pathways	GO:0004356 glutamate-ammonia ligase activity;GO:0004356 glutamate-ammonia ligase activity;GO:0005829 cytosol;GO:0042128 nitrate assimilation
Pp1s35_32V6	2.87414	-1.97034	-2.90033	-3.32193		243	7	4	0	7.33164	0.255192	0.133941	0	PF00141			1.11.1.7	K00430	AT5G17820.1		Peroxidase superfamily protein				Phenylalanine metabolism;Phenylpropanoid biosynthesis;Metabolic pathways;Biosynthesis of secondary metabolites	GO:0004601 peroxidase activity;GO:0004601 peroxidase activity;GO:0006979 response to oxidative stress;GO:0020037 heme binding;GO:0055114 oxidation-reduction process;GO:0005618 cell wall;GO:0009505 plant-type cell wall;GO:0016020 membrane
Pp1s35_376V6	5.57959	1.92274	2.63105	2.17194		1585	104	185	152	47.8216	3.79143	6.19476	4.5063						AT4G32300.1	SD2-5	S-domain-2 5					GO:0016301 kinase activity;GO:0030246 carbohydrate binding;GO:0005886 plasma membrane;GO:0005886 plasma membrane;GO:0004672 protein kinase activity;GO:0031625 ubiquitin protein ligase binding;GO:0031625 ubiquitin protein ligase binding;GO:0031625 ubiquitin protein ligase binding;GO:0046777 protein autophosphorylation
Pp1s37_355V6	1.94932	-0.777698	-0.440902	-2.49102		128	16	22	6	3.86193	0.583297	0.736674	0.17788	PF00759,PF09478	PTHR22298				AT1G64390.1	GH9C2	glycosyl hydrolase 9C2					GO:0003824 catalytic activity;GO:0004553 "hydrolase activity, hydrolyzing O-glycosyl compounds";GO:0004553 "hydrolase activity, hydrolyzing O-glycosyl compounds";GO:0005576 extracellular region;GO:0005975 carbohydrate metabolic process;GO:0012505 endomembrane system;GO:0030246 carbohydrate binding
Pp1s376_46V6	3.83502	1.64857	0.269592	-0.552422		473	86	36	23	14.2711	3.13522	1.20547	0.681875	PF07059					AT5G35180.1		Protein of unknown function (DUF1336)					GO:0007165 signal transduction;GO:0035091 phosphatidylinositol binding;GO:0005886 plasma membrane;GO:0005886 plasma membrane;GO:0005886 plasma membrane;GO:0005829 cytosol;GO:0005829 cytosol;GO:0005829 cytosol;GO:0005829 cytosol
Pp1s389_55V6	3.04208	-2.45577	-2.90033	-3.32193		273	5	4	0	8.23678	0.18228	0.133941	0						AT4G28030.1		Acyl-CoA N-acyltransferases (NAT) superfamily protein					GO:0008080 N-acetyltransferase activity;GO:0008080 N-acetyltransferase activity;GO:0008152 metabolic process;GO:0008152 metabolic process;GO:0009507 chloroplast;GO:0009507 chloroplast
Pp1s4_266V6	2.22545	-0.777698	-0.81287	-3.32193		155	16	17	0	4.67656	0.583297	0.569248	0
Pp1s405_20V6	4.37139	-1.7777	1.22895	-1.90606		686	8	70	9	20.6976	0.291648	2.34396	0.266821
Pp1s42_208V6	1.66357	-1.7777	-1.31537	-3.07598		105	8	12	4	3.16799	0.291648	0.401822	0.118587	PF04536					AT1G54780.1	TLP18.3	thylakoid lumen 18.3 kDa protein					GO:0003674 molecular_function;GO:0009543 chloroplast thylakoid lumen;GO:0031977 thylakoid lumen;GO:0009543 chloroplast thylakoid lumen;GO:0009579 thylakoid;GO:0009535 chloroplast thylakoid membrane;GO:0009507 chloroplast;GO:0009535 chloroplast thylakoid membrane;GO:0009535 chloroplast thylakoid membrane;GO:0010206 photosystem II repair;GO:0009507 chloroplast;GO:0009579 thylakoid
Pp1s456_4V6	2.97169	-0.870808	0.0538632	-0.268629		260	15	31	28	7.84455	0.546841	1.03804	0.830108	PF00515,PF07719,PF08238,PF07721	PTHR23083	KOG4626			AT3G11540.1	SPY	Tetratricopeptide repeat (TPR)-like superfamily protein					GO:0016757 "transferase activity, transferring glycosyl groups";GO:0016262 protein N-acetylglucosaminyltransferase activity;GO:0009938 negative regulation of gibberellic acid mediated signaling pathway;GO:0005634 nucleus;GO:0005634 nucleus;GO:0005737 cytoplasm;GO:0009740 gibberellic acid mediated signaling pathway;GO:0005515 protein binding;GO:0005515 protein binding;GO:0009736 cytokinin mediated…
Pp1s475_5V6	6.49911	3.25021	3.21861	2.9127		2998	261	278	254	90.4538	9.51503	9.30888	7.53027	PF03358,PF00258		KOG3135			AT4G36750.1		Quinone reductase family protein					GO:0010181 FMN binding;GO:0016491 oxidoreductase activity;GO:0045892 "negative regulation of transcription, DNA-dependent";GO:0005886 plasma membrane;GO:0005886 plasma membrane;GO:0005886 plasma membrane;GO:0005886 plasma membrane;GO:0005886 plasma membrane
Pp1s53_155V6	2.22545	-1.60777	0.0065575	-0.683666		155	9	30	21	4.67656	0.328104	1.00456	0.622581						AT1G10660.4
Pp1s54_72V6	5.35659	2.38217	2.24941	-0.432127		1358	143	142	25	40.9727	5.21321	4.7549	0.741168	PF03765,PF00650	PTHR10174	KOG1470			AT1G22180.2		Sec14p-like phosphatidylinositol transfer family protein					GO:0003674 molecular_function;GO:0005575 cellular_component;GO:0008150 biological_process
Pp1s55_140V6	3.3502	-0.45577	0.0538632	-0.121787		338	20	31	31	10.1979	0.729121	1.03804	0.919048		PTHR10366	KOG1429			AT3G63140.1	CSP41A	chloroplast stem-loop binding protein of 41 kDa					GO:0003729 mRNA binding;GO:0009941 chloroplast envelope;GO:0009507 chloroplast;GO:0009570 chloroplast stroma;GO:0010287 plastoglobule;GO:0010287 plastoglobule;GO:0009579 thylakoid;GO:0008266 poly(U) RNA binding;GO:0006364 rRNA processing;GO:0009507 chloroplast;GO:0048046 apoplast;GO:0009570 chloroplast stroma
Pp1s55_182V6	1.64976	-0.870808	-1.4409	-3.32193		104	15	11	0	3.13782	0.546841	0.368337	0	PF00249					AT2G40260.1		Homeodomain-like superfamily protein					GO:0003677 DNA binding;GO:0003700 sequence-specific DNA binding transcription factor activity;GO:0006355 "regulation of transcription, DNA-dependent"
Pp1s58_240V6	4.39641	2.27758	0.957648	-0.988521		698	133	58	17	21.0596	4.84865	1.94214	0.503994	PF05116,PF08472	PTHR12526:SF2				AT2G35840.3		Sucrose-6F-phosphate phosphohydrolase family protein					GO:0000287 magnesium ion binding;GO:0000287 magnesium ion binding;GO:0000287 magnesium ion binding;GO:0003824 catalytic activity;GO:0003824 catalytic activity;GO:0003824 catalytic activity;GO:0005986 sucrose biosynthetic process;GO:0016791 phosphatase activity;GO:0016791 phosphatase activity;GO:0016791 phosphatase activity;GO:0050307 sucrose-phosphatase activity;GO:0050307 sucrose-phosphatase act…
Pp1s59_140V6	3.30688	1.1765	-0.376771	-1.61655		328	62	23	11	9.89621	2.26027	0.770159	0.326114	PF00481	PTHR13832	KOG0698			AT2G33700.1		Protein phosphatase 2C family protein					GO:0003824 catalytic activity;GO:0004722 protein serine/threonine phosphatase activity;GO:0004722 protein serine/threonine phosphatase activity;GO:0006470 protein dephosphorylation
Pp1s65_181V6	3.12923	0.77689	0.0538632	-0.754055		290	47	31	20	8.7497	1.71343	1.03804	0.592934		PTHR11014:SF1				AT4G38225.3							GO:0003674 molecular_function;GO:0008150 biological_process;GO:0009507 chloroplast;GO:0009507 chloroplast;GO:0009507 chloroplast
Pp1s65_78V6	1.70421	-0.45577	-0.81287	-1.61655		108	20	17	11	3.25851	0.729121	0.569248	0.326114						AT4G12070.1							GO:0008150 biological_process;GO:0005886 plasma membrane
Pp1s69_45V6	1.7695	-0.607773	-0.440902	-2.07598		113	18	22	8	3.40936	0.656209	0.736674	0.237174	PF00571	PTHR11911				AT4G34120.1	LEJ1	Cystathionine beta-synthase (CBS) family protein					GO:0003674 molecular_function;GO:0008150 biological_process;GO:0009507 chloroplast;GO:0009507 chloroplast;GO:0009570 chloroplast stroma
Pp1s70_122V6	3.6288	1.61462	1.47471	-0.552422		410	84	83	23	12.3703	3.06231	2.77927	0.681875	PF07250,PF09118					AT3G53950.1		glyoxal oxidase-related protein					GO:0003674 molecular_function;GO:0008150 biological_process
Pp1s8_36V6	5.9316	3.86616	3.16036	1.92402		2023	400	267	128	61.0367	14.5824	8.94055	3.79478	PF02365					AT5G04410.1	NAC2	NAC domain containing protein 2					GO:0007275 multicellular organismal development;GO:0003700 sequence-specific DNA binding transcription factor activity;GO:0005634 nucleus;GO:0005737 cytoplasm;GO:0009644 response to high light intensity;GO:0009962 regulation of flavonoid biosynthetic process;GO:0045893 "positive regulation of transcription, DNA-dependent";GO:0045893 "positive regulation of transcription, DNA-dependent"
Pp1s8_86V6	5.51728	0.614619	0.421595	0.41587		1518	42	40	45	45.8001	1.53115	1.33941	1.3341	PF00011	PTHR11527	KOG0710		K13993	AT1G53540.1		HSP20-like chaperones superfamily protein				Protein processing in endoplasmic reticulum	GO:0009408 response to heat
Pp1s81_246V6	4.90643	0.0296564	2.36645	0.209419		994	28	154	39	29.9903	1.02077	5.15672	1.15622	PF00722,PF06955					AT4G03210.1	XTH9	xyloglucan endotransglucosylase/hydrolase 9					GO:0005618 cell wall;GO:0005618 cell wall;GO:0005975 carbohydrate metabolic process;GO:0005975 carbohydrate metabolic process;GO:0006073 cellular glucan metabolic process;GO:0006073 cellular glucan metabolic process;GO:0012505 endomembrane system;GO:0016798 "hydrolase activity, acting on glycosyl bonds";GO:0048046 apoplast;GO:0048046 apoplast;GO:0016762 xyloglucan:xyloglucosyl transferase activity
Pp1s88_142V6	6.80614	4.24744	4.43282	4.25045		3709	521	645	642	111.906	18.9936	21.5979	19.0332	PF11976,PF00240,PF07708	PTHR10666	KOG0005		K04551	AT4G05320.2	UBQ10	polyubiquitin 10					GO:0006464 protein modification process;GO:0009751 response to salicylic acid stimulus;GO:0006464 protein modification process;GO:0007568 aging
Pp1s90_29V6	2.69752	-0.0772588	0.457219	-1.07598		215	26	41	16	6.48684	0.947857	1.37289	0.474348	PF00010					AT5G08130.1	BIM1	basic helix-loop-helix (bHLH) DNA-binding superfamily protein					GO:0003677 DNA binding;GO:0005634 nucleus;GO:0005634 nucleus;GO:0005634 nucleus;GO:0005634 nucleus;GO:0005634 nucleus;GO:0005634 nucleus;GO:0003700 sequence-specific DNA binding transcription factor activity;GO:0006355 "regulation of transcription, DNA-dependent";GO:0003700 sequence-specific DNA binding transcription factor activity;GO:0003700 sequence-specific DNA binding transcription factor ac…
Pp1s93_52V6	3.39227	1.19958	1.20819	0.806659		348	63	69	59	10.4996	2.29673	2.31048	1.74916	PF01148	PTHR13773				AT2G45150.1	CDS4	cytidinediphosphate diacylglycerol synthase 4					GO:0004605 phosphatidate cytidylyltransferase activity;GO:0008654 phospholipid biosynthetic process;GO:0016020 membrane;GO:0004605 phosphatidate cytidylyltransferase activity;GO:0009536 plastid
Pp1s97_20V6	2.13915	-0.45577	-0.730408	-2.26863		146	20	18	7	4.40502	0.729121	0.602733	0.207527
Pp1s1_221V6	2.32436	-0.022811	-0.256477	-0.552422		166	27	25	23	5.00845	0.984313	0.83713	0.681875	PF01197					AT1G75350.1	emb2184	Ribosomal protein L31					GO:0003735 structural constituent of ribosome;GO:0003735 structural constituent of ribosome;GO:0005840 ribosome;GO:0006412 translation;GO:0009793 embryo development ending in seed dormancy;GO:0042254 ribosome biogenesis;GO:0009941 chloroplast envelope;GO:0009570 chloroplast stroma;GO:0009507 chloroplast
Pp1s11_397V6	5.15512	2.02966	2.14406	1.44758		1181	112	132	92	35.6324	4.08308	4.42004	2.7275	PF02800	PTHR10836	KOG0657	1.2.1.13	K05298	AT1G12900.2	GAPA-2	glyceraldehyde 3-phosphate dehydrogenase A subunit 2				Carbon fixation in photosynthetic organisms;Metabolic pathways	GO:0006006 glucose metabolic process;GO:0006006 glucose metabolic process;GO:0006006 glucose metabolic process;GO:0006096 glycolysis;GO:0008943 glyceraldehyde-3-phosphate dehydrogenase activity;GO:0008943 glyceraldehyde-3-phosphate dehydrogenase activity;GO:0008943 glyceraldehyde-3-phosphate dehydrogenase activity;GO:0008943 glyceraldehyde-3-phosphate dehydrogenase activity;GO:0051287 NAD or NADH…
Pp1s112_154V6	1.73068	-0.385381	-0.315371	-0.988521		110	21	24	17	3.31885	0.765577	0.803645	0.503994	PF00643,PF06203					AT1G68520.1		B-box type zinc finger protein with CCT domain					GO:0005622 intracellular;GO:0008270 zinc ion binding;GO:0003700 sequence-specific DNA binding transcription factor activity;GO:0006355 "regulation of transcription, DNA-dependent"
Pp1s119_146V6	2.04736	-1.19274	-2.31537	-3.32193		137	12	6	0	4.13348	0.437472	0.200911	0
Pp1s12_395V6	1.60754	-0.690236	-1.19989	-1.61655		101	17	13	11	3.04731	0.619753	0.435307	0.326114	PF00909	PTHR11730	KOG0682			AT2G38290.1	AMT2	ammonium transporter 2					GO:0008519 ammonium transmembrane transporter activity;GO:0005886 plasma membrane;GO:0015398 high affinity secondary active ammonium transmembrane transporter activity;GO:0015696 ammonium transport;GO:0009624 response to nematode;GO:0005886 plasma membrane;GO:0005886 plasma membrane
Pp1s12_68V6	1.84414	-3.7777	-3.32193	-3.32193		119	2	0	0	3.59039	0.0729121	0	0	PF00477					AT2G40170.1	GEA6	Stress induced protein					GO:0003674 molecular_function;GO:0005575 cellular_component;GO:0048316 seed development;GO:0048700 acquisition of desiccation tolerance;GO:0009737 response to abscisic acid stimulus
Pp1s134_68V6	2.38395	-1.07726	-0.993443	-1.49102		173	13	15	12	5.21965	0.473928	0.502278	0.355761						AT1G18060.1							GO:0008150 biological_process;GO:0009507 chloroplast;GO:0009507 chloroplast
Pp1s136_15V6	3.04736	0.866158	-1.09298	-2.49102		274	50	14	6	8.26695	1.8228	0.468793	0.17788	PF00168	PTHR10774:SF2				AT3G14590.2	NTMC2T6.2	Calcium-dependent lipid-binding (CaLB domain) family protein					GO:0009507 chloroplast
Pp1s141_64V6	1.83197	-0.690236	-0.256477	-0.432127		118	17	25	25	3.56022	0.619753	0.83713	0.741168	PF00454	PTHR15245:SF11	KOG2381			AT1G13640.1		Phosphatidylinositol 3- and 4-kinase family protein					GO:0004428 inositol or phosphatidylinositol kinase activity;GO:0005575 cellular_component;GO:0016773 "phosphotransferase activity, alcohol group as acceptor"
Pp1s152_29V6	1.59318	-3.32193	-1.4409	-2.49102		100	0	11	6	3.01714	0	0.368337	0.17788
Pp1s162_92V6	2.68403	-3.32193	-3.32193	-2.49102		213	0	0	6	6.4265	0	0	0.17788	PF00847					AT3G57600.1		Integrase-type DNA-binding superfamily protein					GO:0003677 DNA binding;GO:0003700 sequence-specific DNA binding transcription factor activity;GO:0005634 nucleus;GO:0006355 "regulation of transcription, DNA-dependent";GO:0006355 "regulation of transcription, DNA-dependent";GO:0003700 sequence-specific DNA binding transcription factor activity
Pp1s172_32V6	2.58595	0.266696	-0.199893	-0.491021		199	33	26	24	6.0041	1.20305	0.870615	0.711521	PF00612,PF02179					AT2G46240.1	BAG6	BCL-2-associated athanogene 6					GO:0006915 apoptosis;GO:0042981 regulation of apoptosis;GO:0005515 protein binding;GO:0005516 calmodulin binding;GO:0012502 induction of programmed cell death;GO:0009408 response to heat;GO:0009409 response to cold;GO:0010228 vegetative to reproductive phase transition of meristem;GO:0050832 defense response to fungus;GO:0009408 response to heat;GO:0009644 response to high light intensity;GO:0042…
Pp1s175_59V6	3.94085	1.80726	1.50906	1.36696		509	96	85	87	15.3572	3.49978	2.84624	2.57926	PF06200	PTHR23418:SF2				AT4G32570.1	TIFY8	TIFY domain protein 8					GO:0005575 cellular_component;GO:0008150 biological_process;GO:0005515 protein binding
Pp1s199_24V6	2.33303	0.351585	-0.376771	-0.828056		167	35	23	19	5.03862	1.27596	0.770159	0.563288	PF06972					AT3G07660.1		Kinase-related protein of unknown function (DUF1296)					GO:0003674 molecular_function;GO:0005575 cellular_component;GO:0008150 biological_process
Pp1s20_77V6	2.30688	-3.32193	-2.57841	-3.32193		164	0	5	0	4.9481	0	0.167426	0	PF00141			1.11.1.7	K00430	AT5G14130.1		Peroxidase superfamily protein				Phenylalanine metabolism;Phenylpropanoid biosynthesis;Metabolic pathways;Biosynthesis of secondary metabolites	GO:0004601 peroxidase activity;GO:0004601 peroxidase activity;GO:0006979 response to oxidative stress;GO:0012505 endomembrane system;GO:0020037 heme binding;GO:0055114 oxidation-reduction process
Pp1s204_123V6	3.98275	0.681733	0.385069	0.478605		524	44	39	47	15.8098	1.60407	1.30592	1.3934	PF00388,PF00387,PF00168	PTHR10336	KOG0169			AT3G08510.1	PLC2	phospholipase C 2				Inositol phosphate metabolism;Metabolic pathways;Phosphatidylinositol signaling system	GO:0006629 lipid metabolic process;GO:0006629 lipid metabolic process;GO:0006629 lipid metabolic process;GO:0007165 signal transduction;GO:0007165 signal transduction;GO:0007165 signal transduction;GO:0007165 signal transduction;GO:0035556 intracellular signal transduction;GO:0035556 intracellular signal transduction;GO:0035556 intracellular signal transduction;GO:0005886 plasma membrane;GO:00058…
Pp1s215_83V6	2.20671	-2.19274	-1.4409	-2.26863		153	6	11	7	4.61622	0.218736	0.368337	0.207527	PF00254	PTHR10516	KOG0552	5.2.1.8	K01802	AT1G20810.1		FKBP-like peptidyl-prolyl cis-trans isomerase family protein					GO:0000413 protein peptidyl-prolyl isomerization;GO:0003755 peptidyl-prolyl cis-trans isomerase activity;GO:0003755 peptidyl-prolyl cis-trans isomerase activity;GO:0005528 FK506 binding;GO:0005528 FK506 binding;GO:0009543 chloroplast thylakoid lumen;GO:0016020 membrane;GO:0018208 peptidyl-proline modification;GO:0009543 chloroplast thylakoid lumen;GO:0031977 thylakoid lumen;GO:0009507 chloroplast
Pp1s225_90V6	2.45712	0.392227	-0.730408	-1.37554		182	36	18	13	5.49119	1.31242	0.602733	0.385407	PF00069	PTHR23258	KOG1187			AT2G02800.1	APK2B	protein kinase 2B					GO:0004672 protein kinase activity;GO:0004672 protein kinase activity;GO:0004674 protein serine/threonine kinase activity;GO:0004674 protein serine/threonine kinase activity;GO:0005524 ATP binding;GO:0005524 ATP binding;GO:0006468 protein phosphorylation;GO:0006468 protein phosphorylation;GO:0016301 kinase activity;GO:0005634 nucleus;GO:0005737 cytoplasm;GO:0005886 plasma membrane;GO:0005886 plas…
Pp1s242_73V6	1.78221	-2.45577	-0.440902	-0.491021		114	5	22	24	3.43954	0.18228	0.736674	0.711521	PF00400,PF03372	PTHR11200	KOG0565			AT2G43900.1		Endonuclease/exonuclease/phosphatase family protein					GO:0004437 inositol or phosphatidylinositol phosphatase activity;GO:0004445 inositol-polyphosphate 5-phosphatase activity;GO:0008150 biological_process;GO:0080008 CUL4 RING ubiquitin ligase complex
Pp1s27_81V6	5.03811	1.08028	1.75788	1.49387		1089	58	101	95	32.8566	2.11445	3.382	2.81644	PF08267,PF01717		KOG2263	2.1.1.14	K00549	AT5G17920.2	ATMS1	Cobalamin-independent synthase family protein				Cysteine and methionine metabolism;Selenoamino acid metabolism;Metabolic pathways;Biosynthesis of secondary metabolites	GO:0003871 5-methyltetrahydropteroyltriglutamate-homocysteine S-methyltransferase activity;GO:0005829 cytosol;GO:0009086 methionine biosynthetic process;GO:0005829 cytosol;GO:0008705 methionine synthase activity;GO:0046686 response to cadmium ion;GO:0005507 copper ion binding;GO:0005774 vacuolar membrane;GO:0005774 vacuolar membrane;GO:0005886 plasma membrane;GO:0005886 plasma membrane;GO:0016020…
Pp1s299_74V6	3.49236	-1.31827	-0.652406	0.209419		373	11	19	39	11.2539	0.401016	0.636219	1.15622						AT5G10625.1							GO:0003674 molecular_function;GO:0003674 molecular_function;GO:0005575 cellular_component;GO:0008150 biological_process
Pp1s30_266V6	1.71751	-2.45577	-3.32193	-3.32193		109	5	0	0	3.28868	0.18228	0	0	PF00514	PTHR23315	KOG4224			AT5G50900.1		ARM repeat superfamily protein					GO:0005488 binding;GO:0005575 cellular_component;GO:0008150 biological_process
Pp1s307_19V6	1.89184	-0.133842	-0.440902	-0.375544		123	25	22	26	3.71108	0.911401	0.736674	0.770815	PF01138,PF03725,PF03726,PF00013,PF00575	PTHR11252	KOG1067	2.7.7.8	K00962	AT3G03710.1	RIF10	polyribonucleotide nucleotidyltransferase, putative				Purine metabolism;Pyrimidine metabolism;RNA degradation	GO:0000175 3'-5'-exoribonuclease activity;GO:0000175 3'-5'-exoribonuclease activity;GO:0003676 nucleic acid binding;GO:0003723 RNA binding;GO:0003723 RNA binding;GO:0004654 polyribonucleotide nucleotidyltransferase activity;GO:0009507 chloroplast;GO:0009570 chloroplast stroma;GO:0010323 "negative regulation of isopentenyl diphosphate biosynthetic process, mevalonate-independent pathway";GO:001599…
Pp1s31_388V6	3.30247	0.614619	0.743523	1.20942		327	42	50	78	9.86604	1.53115	1.67426	2.31244	PF00447	PTHR10015				AT4G17750.1	HSF1	heat shock factor 1					GO:0003677 DNA binding;GO:0003700 sequence-specific DNA binding transcription factor activity;GO:0003700 sequence-specific DNA binding transcription factor activity;GO:0005515 protein binding;GO:0005515 protein binding;GO:0005634 nucleus;GO:0009408 response to heat;GO:0003677 DNA binding;GO:0009408 response to heat;GO:0005515 protein binding;GO:0005515 protein binding
Pp1s324_49V6	2.27125	-0.870808	-0.900333	-0.491021		160	15	16	24	4.82742	0.546841	0.535763	0.711521	PF00763,PF02882	PTHR10025	KOG0089			AT4G00620.1		Amino acid dehydrogenase family protein					GO:0003824 catalytic activity;GO:0003824 catalytic activity;GO:0005488 binding;GO:0008152 metabolic process;GO:0009396 folic acid-containing compound biosynthetic process;GO:0009396 folic acid-containing compound biosynthetic process;GO:0009507 chloroplast
Pp1s326_28V6	2.88006	-3.19274	-2.90033	-2.26863		244	3	4	7	7.36181	0.109368	0.133941	0.207527	PF03005					AT1G01430.1	TBL25	TRICHOME BIREFRINGENCE-LIKE 25					GO:0005575 cellular_component;GO:0008150 biological_process
Pp1s333_42V6	2.17814	-0.777698	-1.4409	-1.49102		150	16	11	12	4.5257	0.583297	0.368337	0.355761	PF02358	PTHR10788				AT5G51460.2	ATTPPA	Haloacid dehalogenase-like hydrolase (HAD) superfamily protein					GO:0004805 trehalose-phosphatase activity;GO:0005992 trehalose biosynthetic process;GO:0004805 trehalose-phosphatase activity;GO:0005992 trehalose biosynthetic process
Pp1s351_7V6	2.03679	-3.19274	-3.32193	-3.32193		136	3	0	0	4.10331	0.109368	0	0	PF04825,PF04824	PTHR12585				AT5G05490.2	SYN1	Rad21/Rec8-like family protein					GO:0003674 molecular_function;GO:0007062 sister chromatid cohesion;GO:0010032 meiotic chromosome condensation;GO:0008278 cohesin complex;GO:0005694 chromosome;GO:0006325 chromatin organization;GO:0051455 attachment of spindle microtubules to kinetochore involved in homologous chromosome segregation;GO:0051754 "meiotic sister chromatid cohesion, centromeric";GO:0007062 sister chromatid cohesion
Pp1s36_257V6	3.43716	0.266696	1.40345	1.2278		359	33	79	79	10.8315	1.20305	2.64533	2.34209	PF00005,PF01061,PF08370	PTHR19241	KOG0065			AT1G15210.1	PDR7	pleiotropic drug resistance 7					GO:0042626 "ATPase activity, coupled to transmembrane movement of substances";GO:0009507 chloroplast;GO:0006855 drug transmembrane transport;GO:0005886 plasma membrane;GO:0005886 plasma membrane;GO:0016020 membrane
Pp1s363_2V6	1.98275	-2.45577	0.0538632	-0.616552		131	5	31	22	3.95245	0.18228	1.03804	0.652228	PF03330,PF01357					AT5G56320.1	EXPA14	expansin A14					GO:0005576 extracellular region;GO:0009826 unidimensional cell growth;GO:0009828 plant-type cell wall loosening;GO:0009831 plant-type cell wall modification involved in multidimensional cell growth;GO:0012505 endomembrane system;GO:0009826 unidimensional cell growth;GO:0009828 plant-type cell wall loosening
Pp1s388_24V6	3.82584	-3.19274	-3.32193	-1.37554		470	3	0	13	14.1805	0.109368	0	0.385407	PF01693
Pp1s42_16V6	4.39019	1.57985	2.18713	2.24594		695	82	136	160	20.9691	2.98939	4.55399	4.74348						AT3G02420.1							GO:0003674 molecular_function;GO:0008150 biological_process;GO:0016020 membrane
Pp1s42_240V6	3.72411	-1.45577	0.22895	1.0533		438	10	35	70	13.2151	0.36456	1.17198	2.07527	PF00782	PTHR10159	KOG1716			AT3G55270.1	MKP1	mitogen-activated protein kinase phosphatase 1					GO:0006470 protein dephosphorylation;GO:0008138 protein tyrosine/serine/threonine phosphatase activity;GO:0017017 MAP kinase tyrosine/serine/threonine phosphatase activity;GO:0010225 response to UV-C;GO:0009651 response to salt stress;GO:0017017 MAP kinase tyrosine/serine/threonine phosphatase activity;GO:0005829 cytosol
Pp1s429_29V6	4.43917	-2.19274	2.39429	1.2278		719	6	157	79	21.6932	0.218736	5.25717	2.34209	PF00316	PTHR11556	KOG1458	3.1.3.37	K01100	AT3G55800.1	SBPASE	sedoheptulose-bisphosphatase				Carbon fixation in photosynthetic organisms;Metabolic pathways	GO:0005975 carbohydrate metabolic process;GO:0042578 phosphoric ester hydrolase activity;GO:0005515 protein binding;GO:0009941 chloroplast envelope;GO:0009507 chloroplast;GO:0005515 protein binding;GO:0005986 sucrose biosynthetic process;GO:0016051 carbohydrate biosynthetic process;GO:0019252 starch biosynthetic process;GO:0050278 sedoheptulose-bisphosphatase activity;GO:0009570 chloroplast strom…
Pp1s433_10V6	6.59318	2.7301	2.66191	3.68889		3200	182	189	435	96.5484	6.635	6.3287	12.8963	PF02678,PF07883	PTHR13903				AT2G43120.1		RmlC-like cupins superfamily protein					GO:0008150 biological_process;GO:0005516 calmodulin binding;GO:0005886 plasma membrane
Pp1s442_10V6	4.50774	0.977189	0.714377	1.35028		754	54	49	86	22.7492	1.96863	1.64077	2.54962	PF06200,PF09425					AT1G74950.1	TIFY10B	TIFY domain/Divergent CCT motif family protein				Plant hormone signal transduction;Plant-pathogen interaction	GO:0009753 response to jasmonic acid stimulus;GO:0009611 response to wounding;GO:0005515 protein binding;GO:0005515 protein binding;GO:0005515 protein binding
Pp1s47_119V6	2.63582	-0.690236	-2.57841	-3.49102		206	17	5	3	6.2153	0.619753	0.167426	0.0889402		PTHR11999	KOG0629	4.1.1.22	K01590	AT1G43710.1	emb1075	Pyridoxal phosphate (PLP)-dependent transferases superfamily protein				Histidine metabolism;Metabolic pathways;Biosynthesis of secondary metabolites	GO:0003824 catalytic activity;GO:0006520 cellular amino acid metabolic process;GO:0009793 embryo development ending in seed dormancy;GO:0016831 carboxy-lyase activity;GO:0016831 carboxy-lyase activity;GO:0030170 pyridoxal phosphate binding
Pp1s526_10V6	3.33303	-3.32193	-1.90033	-1.37554		334	0	8	13	10.0772	0	0.267882	0.385407	PF00067	PTHR19383	KOG0156			AT1G01280.1	CYP703A2	cytochrome P450, family 703, subfamily A, polypeptide 2					GO:0010584 pollen exine formation;GO:0012505 endomembrane system;GO:0019825 oxygen binding;GO:0010208 pollen wall assembly;GO:0016709 "oxidoreductase activity, acting on paired donors, with incorporation or reduction of molecular oxygen, NADH or NADPH as one donor, and incorporation of one atom of oxygen";GO:0051791 medium-chain fatty acid metabolic process;GO:0051792 medium-chain fatty acid bios…
Pp1s53_22V6	3.41285	-0.607773	1.42159	1.09394		353	18	80	72	10.6505	0.656209	2.67882	2.13456		PTHR22274:SF3	KOG4498			AT2G37240.1		Thioredoxin superfamily protein					GO:0008150 biological_process;GO:0016209 antioxidant activity;GO:0016491 oxidoreductase activity;GO:0009507 chloroplast
Pp1s55_207V6	2.79481	0.431755	0.22895	0.731371		230	37	35	56	6.93941	1.34887	1.17198	1.66022	PF02383	PTHR11200	KOG1889			AT3G51460.1	RHD4	Phosphoinositide phosphatase family protein					GO:0004439 "phosphatidylinositol-4,5-bisphosphate 5-phosphatase activity";GO:0005886 plasma membrane;GO:0031520 plasma membrane of cell tip;GO:0043812 phosphatidylinositol-4-phosphate phosphatase activity;GO:0048768 root hair cell tip growth;GO:0090404 pollen tube tip
Pp1s56_122V6	1.63582	-2.45577	-1.73041	-1.75406		103	5	9	10	3.10765	0.18228	0.301367	0.296467	PF00036	PTHR10891				AT2G27030.3	CAM5	calmodulin 5					GO:0005509 calcium ion binding;GO:0005509 calcium ion binding;GO:0005509 calcium ion binding;GO:0005509 calcium ion binding;GO:0005515 protein binding;GO:0005515 protein binding;GO:0005515 protein binding;GO:0005515 protein binding;GO:0005515 protein binding;GO:0005515 protein binding;GO:0005515 protein binding;GO:0005515 protein binding;GO:0005515 protein binding;GO:0005515 protein binding;GO:00…
Pp1s60_106V6	7.44068	4.92793	5.13996	5.43181		5758	835	1053	1456	173.727	30.4408	35.2599	43.1656	PF01507	PTHR18929	KOG0189	1.8.4.9	K05907	AT4G21990.1	40636	APS reductase 3					GO:0009507 chloroplast;GO:0000103 sulfate assimilation;GO:0009507 chloroplast;GO:0000103 sulfate assimilation;GO:0009973 adenylyl-sulfate reductase activity
Pp1s60_148V6	2.71751	-1.19274	-0.652406	-0.491021		218	12	19	24	6.57736	0.437472	0.636219	0.711521	PF00847					AT4G17500.1	ERF-1	ethylene responsive element binding factor 1					GO:0003677 DNA binding;GO:0003700 sequence-specific DNA binding transcription factor activity;GO:0005643 nuclear pore;GO:0006355 "regulation of transcription, DNA-dependent";GO:0045893 "positive regulation of transcription, DNA-dependent";GO:0003700 sequence-specific DNA binding transcription factor activity;GO:0010200 response to chitin
Pp1s61_255V6	2.29805	-0.133842	0.0065575	0.245945		163	25	30	40	4.91793	0.911401	1.00456	1.18587	PF05697,PF05698					AT5G55220.1		trigger factor type chaperone family protein					GO:0003755 peptidyl-prolyl cis-trans isomerase activity;GO:0006457 protein folding;GO:0006457 protein folding;GO:0015031 protein transport;GO:0009941 chloroplast envelope;GO:0009941 chloroplast envelope;GO:0009570 chloroplast stroma;GO:0009507 chloroplast
Pp1s1_402V6	4.04208	0.222302	0.30912	0.854754		546	32	37	61	16.4736	1.16659	1.23895	1.80845	PF03152,PF00096,PF02176	PTHR12555	KOG1816			AT4G15420.1		Ubiquitin fusion degradation UFD1 family protein					GO:0006508 proteolysis;GO:0006511 ubiquitin-dependent protein catabolic process;GO:0008233 peptidase activity;GO:0008270 zinc ion binding
Pp1s112_99V6	2.01541	-3.32193	-3.90033	-3.32193		134	0	2	0	4.04296	0	0.0669704	0	PF00141			1.11.1.7	K00430	AT5G17820.1		Peroxidase superfamily protein				Phenylalanine metabolism;Phenylpropanoid biosynthesis;Metabolic pathways;Biosynthesis of secondary metabolites	GO:0004601 peroxidase activity;GO:0004601 peroxidase activity;GO:0006979 response to oxidative stress;GO:0020037 heme binding;GO:0055114 oxidation-reduction process;GO:0005618 cell wall;GO:0009505 plant-type cell wall;GO:0016020 membrane
Pp1s13_171V6	4.82584	1.08028	1.82759	2.51647		940	58	106	193	28.3611	2.11445	3.54943	5.72182	PF00289,PF02786,PF02785,PF00364,PF08326,PF01039	PTHR18866	KOG0368	6.3.4.14,6.4.1.2	K11262	AT1G36160.1	ACC1	acetyl-CoA carboxylase 1				Fatty acid biosynthesis;Pyruvate metabolism;Propanoate metabolism;Metabolic pathways	GO:0003989 acetyl-CoA carboxylase activity;GO:0010072 primary shoot apical meristem specification;GO:0030497 fatty acid elongation;GO:0005886 plasma membrane;GO:0003989 acetyl-CoA carboxylase activity;GO:0009793 embryo development ending in seed dormancy;GO:0009933 meristem structural organization;GO:0009735 response to cytokinin stimulus;GO:0009793 embryo development ending in seed dormancy;GO:0…
Pp1s149_288V6	3.27125	-0.192736	-0.0423521	1.01148		320	24	29	68	9.65484	0.874945	0.97107	2.01598	PF04043,PF01095					AT5G49180.1		Plant invertase/pectin methylesterase inhibitor superfamily				Pentose and glucuronate interconversions;Starch and sucrose metabolism;Metabolic pathways	GO:0004857 enzyme inhibitor activity;GO:0009505 plant-type cell wall;GO:0030599 pectinesterase activity;GO:0030599 pectinesterase activity;GO:0042545 cell wall modification
Pp1s16_111V6	2.99917	0.866158	-0.81287	-1.75406		265	50	17	10	7.99541	1.8228	0.569248	0.296467	PF00804,PF05739	PTHR19957	KOG0810		K08486	AT1G61290.1	SYP124	syntaxin of plants 124				SNARE interactions in vesicular transport	GO:0005484 SNAP receptor activity;GO:0006886 intracellular protein transport;GO:0006944 cellular membrane fusion;GO:0005886 plasma membrane;GO:0009860 pollen tube growth;GO:0030133 transport vesicle
Pp1s17_105V6	1.88006	-1.31827	-0.81287	-0.0759835		122	11	17	32	3.68091	0.401016	0.569248	0.948695	PF01388					AT4G11400.1		ARID/BRIGHT DNA-binding domain;ELM2 domain protein					GO:0003677 DNA binding;GO:0003677 DNA binding;GO:0005773 vacuole
Pp1s177_55V6	1.66357	-3.19274	-3.31537	-2.26863		105	3	3	7	3.16799	0.109368	0.100456	0.207527	PF00311	PTHR13793:SF2				AT3G14940.1	PPC3	phosphoenolpyruvate carboxylase 3				Pyruvate metabolism;Carbon fixation in photosynthetic organisms;Metabolic pathways	GO:0006099 tricarboxylic acid cycle;GO:0008964 phosphoenolpyruvate carboxylase activity;GO:0008964 phosphoenolpyruvate carboxylase activity;GO:0005829 cytosol
Pp1s197_32V6	3.2531	1.10494	0.854554	1.2278		316	59	54	79	9.53415	2.15091	1.8082	2.34209	PF04733	PTHR10805	KOG3081			AT1G30630.1		Coatomer epsilon subunit					GO:0005198 structural molecule activity;GO:0005488 binding;GO:0006890 "retrograde vesicle-mediated transport, Golgi to ER";GO:0006890 "retrograde vesicle-mediated transport, Golgi to ER";GO:0008565 protein transporter activity;GO:0005774 vacuolar membrane;GO:0005829 cytosol
Pp1s215_82V6	2.34164	-1.7777	-0.993443	-0.321096		168	8	15	27	5.06879	0.291648	0.502278	0.800462	PF00542	PTHR11809	KOG1715			AT3G27830.1	RPL12-A	ribosomal protein L12-A				Ribosome	GO:0003735 structural constituent of ribosome;GO:0003735 structural constituent of ribosome;GO:0006412 translation;GO:0015934 large ribosomal subunit;GO:0009535 chloroplast thylakoid membrane;GO:0009579 thylakoid;GO:0009507 chloroplast;GO:0009535 chloroplast thylakoid membrane;GO:0009535 chloroplast thylakoid membrane;GO:0009295 nucleoid;GO:0009579 thylakoid;GO:0009507 chloroplast;GO:0009570 chlo…
Pp1s224_112V6	1.78221	-1.60777	-3.32193	-4.07598		114	9	0	2	3.43954	0.328104	0	0.0592934	PF00804,PF05739	PTHR19957	KOG0809		K08489	AT5G26980.2	SYP41	syntaxin of plants 41				SNARE interactions in vesicular transport	GO:0005515 protein binding;GO:0005802 trans-Golgi network;GO:0005484 SNAP receptor activity;GO:0005802 trans-Golgi network;GO:0006886 intracellular protein transport;GO:0006944 cellular membrane fusion;GO:0030140 trans-Golgi network transport vesicle
Pp1s227_100V6	1.97169	-3.32193	-0.376771	-0.321096		130	0	23	27	3.92228	0	0.770159	0.800462	PF02365					AT5G53950.1	CUC2	NAC (No Apical Meristem) domain transcriptional regulator superfamily protein					GO:0005575 cellular_component;GO:0007275 multicellular organismal development;GO:0010072 primary shoot apical meristem specification;GO:0003700 sequence-specific DNA binding transcription factor activity;GO:0003700 sequence-specific DNA binding transcription factor activity;GO:0048366 leaf development;GO:0048504 regulation of timing of organ formation;GO:0010223 secondary shoot formation;GO:00101…
Pp1s266_52V6	3.05785	-1.7777	-3.32193	-3.49102		276	8	0	3	8.3273	0.291648	0	0.0889402	PF00009,PF01926,PF03144	PTHR23115	KOG0464			AT2G45030.1		Translation elongation factor EFG/EF2 protein					GO:0003746 translation elongation factor activity;GO:0003746 translation elongation factor activity;GO:0003924 GTPase activity;GO:0005525 GTP binding;GO:0008135 "translation factor activity, nucleic acid binding";GO:0005739 mitochondrion;GO:0005739 mitochondrion;GO:0046686 response to cadmium ion
Pp1s34_240V6	1.59318	-2.45577	-1.4409	-0.375544		100	5	11	26	3.01714	0.18228	0.368337	0.770815	PF08879					AT2G42040.1							GO:0003674 molecular_function;GO:0008150 biological_process
Pp1s342_36V6	2.05785	-3.7777	-3.32193	-1.26863		138	2	0	14	4.16365	0.0729121	0	0.415054	PF01388,PF00249	PTHR15348:SF4				AT4G11400.1		ARID/BRIGHT DNA-binding domain;ELM2 domain protein					GO:0003677 DNA binding;GO:0003677 DNA binding;GO:0005773 vacuole
Pp1s47_120V6	4.01541	1.15304	-0.652406	-1.37554		536	61	19	13	16.1719	2.22382	0.636219	0.385407
Pp1s59_42V6	5.22545	-1.97034	-0.0423521	2.83091		1240	7	29	240	37.4125	0.255192	0.97107	7.11521	PF00005,PF01061,PF08370	PTHR19241	KOG0065			AT1G59870.1	PEN3	ABC-2 and Plant PDR ABC-type transporter family protein					GO:0042626 "ATPase activity, coupled to transmembrane movement of substances";GO:0009941 chloroplast envelope;GO:0005886 plasma membrane;GO:0009507 chloroplast;GO:0005739 mitochondrion;GO:0005886 plasma membrane;GO:0009507 chloroplast;GO:0009627 systemic acquired resistance;GO:0009817 "defense response to fungus, incompatible interaction";GO:0006855 drug transmembrane transport;GO:0005886 plasma …
Pp1s15_186V6	4.32219	2.05519	-2.57841	-4.07598		663	114	5	2	20.0036	4.15599	0.167426	0.0592934	PF00847				K09286	AT4G32800.1		Integrase-type DNA-binding superfamily protein					GO:0003677 DNA binding;GO:0003700 sequence-specific DNA binding transcription factor activity;GO:0005634 nucleus;GO:0006355 "regulation of transcription, DNA-dependent";GO:0006355 "regulation of transcription, DNA-dependent";GO:0003700 sequence-specific DNA binding transcription factor activity
Pp1s190_33V6	3.16849	0.351585	-2.90033	-3.49102		298	35	4	3	8.99107	1.27596	0.133941	0.0889402	PF02178,PF03479					AT2G33620.2		AT hook motif DNA-binding family protein					GO:0003677 DNA binding;GO:0003677 DNA binding;GO:0003677 DNA binding;GO:0003677 DNA binding;GO:0003677 DNA binding;GO:0005829 cytosol
Pp1s193_64V6	4.33519	2.25572	1.09967	1.75691		669	131	64	114	20.1846	4.77574	2.14305	3.37973	PF00400	PTHR14107	KOG2394			AT3G53390.1		Transducin/WD40 repeat-like superfamily protein					GO:0000166 nucleotide binding;GO:0005575 cellular_component;GO:0008150 biological_process
Pp1s194_15V6	3.7142	-0.133842	-2.90033	-0.616552		435	25	4	22	13.1245	0.911401	0.133941	0.652228	PF00011	PTHR11527	KOG3591		K13993	AT1G53540.1		HSP20-like chaperones superfamily protein				Protein processing in endoplasmic reticulum	GO:0009408 response to heat
Pp1s230_64V6	2.93801	0.807264	-3.32193	-3.49102		254	48	0	3	7.66353	1.74989	0	0.0889402	PF00926,PF00925	PTHR21327	KOG1284	3.5.4.25,4.1.99.12	K14652	AT5G64300.1	GCH	GTP cyclohydrolase II				Riboflavin metabolism;Metabolic pathways	GO:0003935 GTP cyclohydrolase II activity;GO:0008686 "3,4-dihydroxy-2-butanone-4-phosphate synthase activity";GO:0009231 riboflavin biosynthetic process;GO:0003935 GTP cyclohydrolase II activity;GO:0008686 "3,4-dihydroxy-2-butanone-4-phosphate synthase activity";GO:0009231 riboflavin biosynthetic process;GO:0016020 membrane;GO:0009507 chloroplast;GO:0003935 GTP cyclohydrolase II activity;GO:00092…
Pp1s258_81V6	2.40053	-0.022811	-3.31537	-0.906058		175	27	3	18	5.27999	0.984313	0.100456	0.533641	PF00450	PTHR11802	KOG1283	3.4.16.-	K09646	AT2G27920.1	SCPL51	serine carboxypeptidase-like 51					GO:0004185 serine-type carboxypeptidase activity;GO:0004185 serine-type carboxypeptidase activity;GO:0004185 serine-type carboxypeptidase activity;GO:0004185 serine-type carboxypeptidase activity;GO:0005739 mitochondrion;GO:0006508 proteolysis;GO:0006508 proteolysis;GO:0006508 proteolysis;GO:0006508 proteolysis;GO:0012505 endomembrane system
Pp1s51_62V6	2.07861	-0.777698	-3.32193	-1.37554		140	16	0	13	4.22399	0.583297	0	0.385407	PF03810,PF08389,PF02985,PF08767	PTHR11223	KOG2020		K14290	AT5G17020.1	XPO1A	exportin 1A				Ribosome biogenesis in eukaryotes;RNA transport	GO:0000059 "protein import into nucleus, docking";GO:0005634 nucleus;GO:0005643 nuclear pore;GO:0005737 cytoplasm;GO:0008565 protein transporter activity;GO:0004872 receptor activity;GO:0005515 protein binding;GO:0005634 nucleus;GO:0006611 protein export from nucleus;GO:0009553 embryo sac development;GO:0009555 pollen development;GO:0009846 pollen germination;GO:0009860 pollen tube growth;GO:0005…
Pp1s55_273V6	4.06046	1.56215	-0.376771	1.20942		553	81	23	78	16.6848	2.95294	0.770159	2.31244	PF03600	PTHR10283	KOG2639			AT1G02260.1		Divalent ion symporter					GO:0005215 transporter activity;GO:0012505 endomembrane system;GO:0015137 citrate transmembrane transporter activity;GO:0015746 citrate transport;GO:0016021 integral to membrane;GO:0016021 integral to membrane;GO:0055085 transmembrane transport
Pp1s6_285V6	3.7599	1.37205	-1.90033	-3.07598		449	71	8	4	13.5469	2.58838	0.267882	0.118587	PF04784	PTHR23054				AT3G13000.2		Protein of unknown function, DUF547					GO:0003700 sequence-specific DNA binding transcription factor activity;GO:0006355 "regulation of transcription, DNA-dependent";GO:0005773 vacuole;GO:0005773 vacuole
Pp1s61_195V6	2.57138	0.507704	-1.4409	-0.616552		197	39	11	22	5.94376	1.42179	0.368337	0.652228	PF10494			2.7.11.1	K08880	AT2G20495.1							GO:0003674 molecular_function;GO:0005575 cellular_component;GO:0008150 biological_process
Pp1s66_76V6	1.60754	-0.777698	-3.32193	-4.07598		101	16	0	2	3.04731	0.583297	0	0.0592934	PF02190	PTHR14255	KOG1400		K11793	AT2G25740.1		ATP-dependent protease La (LON) domain protein					GO:0004176 ATP-dependent peptidase activity;GO:0004176 ATP-dependent peptidase activity;GO:0005575 cellular_component;GO:0006508 proteolysis
Pp1s84_221V6	4.92087	2.93655	-2.09298	2.12369		1004	210	7	147	30.292	7.65577	0.234396	4.35807	PF00481	PTHR13832	KOG0698			AT2G33700.1		Protein phosphatase 2C family protein					GO:0003824 catalytic activity;GO:0004722 protein serine/threonine phosphatase activity;GO:0004722 protein serine/threonine phosphatase activity;GO:0006470 protein dephosphorylation
Pp1s10_253V6	5.53335	2.16482	-0.578405	-0.988521		1535	123	20	17	46.313	4.48409	0.669704	0.503994	PF00717,PF10502	PTHR12383	KOG0171			AT3G24590.1	PLSP1	plastidic type i signal peptidase 1				Protein export	GO:0006508 proteolysis;GO:0008233 peptidase activity;GO:0016020 membrane;GO:0009507 chloroplast;GO:0009535 chloroplast thylakoid membrane;GO:0009535 chloroplast thylakoid membrane;GO:0008233 peptidase activity;GO:0009526 plastid envelope;GO:0009535 chloroplast thylakoid membrane;GO:0010027 thylakoid membrane organization;GO:0009507 chloroplast;GO:0010027 thylakoid membrane organization;GO:0051604…
Pp1s119_138V6	1.59318	-0.777698	-3.90033	-3.32193		100	16	2	0	3.01714	0.583297	0.0669704	0	PF01055	PTHR22762	KOG1065			AT1G68560.1	XYL1	alpha-xylosidase 1					GO:0004553 "hydrolase activity, hydrolyzing O-glycosyl compounds";GO:0009044 "xylan 1,4-beta-xylosidase activity";GO:0009507 chloroplast;GO:0045493 xylan catabolic process;GO:0046556 alpha-N-arabinofuranosidase activity;GO:0005618 cell wall;GO:0048046 apoplast;GO:0009505 plant-type cell wall;GO:0009505 plant-type cell wall;GO:0046686 response to cadmium ion;GO:0010411 xyloglucan metabolic process…
Pp1s119_145V6	2.27125	0.129192	-3.90033	-4.07598		160	30	2	2	4.82742	1.09368	0.0669704	0.0592934
Pp1s130_99V6	3.69752	1.33083	-0.578405	-0.491021		430	69	20	24	12.9737	2.51547	0.669704	0.711521	PF01842,PF07714,PF00069	PTHR23257	KOG0192			AT4G38470.1		ACT-like protein tyrosine kinase family protein					GO:0004672 protein kinase activity;GO:0004712 protein serine/threonine/tyrosine kinase activity;GO:0005829 cytosol
Pp1s166_98V6	2.9266	0.894727	-3.32193	0.447578		252	51	0	46	7.60318	1.85926	0	1.36375	PF02985		KOG1851			AT3G13330.1	PA200	proteasome activating protein 200				Proteasome	GO:0005488 binding;GO:0005575 cellular_component
Pp1s169_58V6	2.90352	0.392227	-2.57841	0.538726		248	36	5	49	7.4825	1.31242	0.167426	1.45269	PF00501	PTHR11968	KOG1175			AT1G55320.1	AAE18	acyl-activating enzyme 18					GO:0003824 catalytic activity;GO:0003824 catalytic activity;GO:0008152 metabolic process;GO:0016874 ligase activity;GO:0005777 peroxisome;GO:0009850 auxin metabolic process
Pp1s17_263V6	3.30688	-0.870808	-3.32193	-3.32193		328	15	0	0	9.89621	0.546841	0	0
Pp1s17_312V6	2.39227	0.176498	-2.90033	-3.07598		174	31	4	4	5.24982	1.13014	0.133941	0.118587	PF01513	PTHR20275	KOG2178			AT1G21640.1	NADK2	NAD kinase 2					GO:0003951 NAD+ kinase activity;GO:0008152 metabolic process;GO:0008152 metabolic process;GO:0019363 pyridine nucleotide biosynthetic process;GO:0003951 NAD+ kinase activity;GO:0005516 calmodulin binding;GO:0009507 chloroplast
Pp1s185_139V6	1.69079	-0.690236	-3.32193	-2.75406		107	17	0	5	3.22834	0.619753	0	0.148234	PF00097	PTHR22764				AT2G20030.1		RING/U-box superfamily protein					GO:0008270 zinc ion binding;GO:0008270 zinc ion binding;GO:0012505 endomembrane system
Pp1s188_107V6	2.02614	-0.192736	-3.90033	-4.07598		135	24	2	2	4.07313	0.874945	0.0669704	0.0592934	PF00249	PTHR12374				AT5G47390.1		myb-like transcription factor family protein					GO:0003677 DNA binding;GO:0003700 sequence-specific DNA binding transcription factor activity;GO:0006355 "regulation of transcription, DNA-dependent";GO:0009651 response to salt stress;GO:0009723 response to ethylene stimulus;GO:0009737 response to abscisic acid stimulus;GO:0009739 response to gibberellin stimulus;GO:0009751 response to salicylic acid stimulus;GO:0009753 response to jasmonic acid…
Pp1s209_41V6	2.04736	-0.385381	-3.90033	-4.07598		137	21	2	2	4.13348	0.765577	0.0669704	0.0592934	PF05627					AT3G25070.1	RIN4	RPM1 interacting protein 4				Plant-pathogen interaction	GO:0009816 "defense response to bacterium, incompatible interaction";GO:0005515 protein binding;GO:0006468 protein phosphorylation;GO:0016020 membrane;GO:0005515 protein binding;GO:0009626 plant-type hypersensitive response;GO:0005886 plasma membrane;GO:0005886 plasma membrane;GO:0016020 membrane;GO:0002237 response to molecule of bacterial origin;GO:0010204 "defense response signaling pathway, r…
Pp1s213_49V6	1.98275	-1.31827	-3.31537	-3.07598		131	11	3	4	3.95245	0.401016	0.100456	0.118587	PF02714	PTHR13018	KOG1134			AT1G30360.1	ERD4	Early-responsive to dehydration stress protein (ERD4)					GO:0009941 chloroplast envelope;GO:0009507 chloroplast;GO:0005773 vacuole;GO:0005886 plasma membrane;GO:0005774 vacuolar membrane;GO:0005886 plasma membrane;GO:0016020 membrane;GO:0005886 plasma membrane
Pp1s213_71V6	2.49622	-0.607773	-3.32193	-3.07598		187	18	0	4	5.64205	0.656209	0	0.118587	PF00097	PTHR22765				AT3G05200.1	ATL6	RING/U-box superfamily protein					GO:0008270 zinc ion binding;GO:0008270 zinc ion binding;GO:0005886 plasma membrane;GO:0004842 ubiquitin-protein ligase activity;GO:0016567 protein ubiquitination;GO:0005886 plasma membrane;GO:0010200 response to chitin
Pp1s215_49V6	4.71254	2.68173	0.0996669	0.41587		869	176	32	45	26.2189	6.41626	1.07153	1.3341	PF02825,PF12174	PTHR14453				AT1G32230.2	RCD1	WWE protein-protein interaction domain protein family					GO:0005515 protein binding;GO:0005634 nucleus;GO:0006979 response to oxidative stress;GO:0000303 response to superoxide;GO:0009723 response to ethylene stimulus;GO:0009816 "defense response to bacterium, incompatible interaction";GO:0009867 jasmonic acid mediated signaling pathway;GO:0009873 ethylene mediated signaling pathway;GO:0010193 response to ozone;GO:0042542 response to hydrogen peroxide;…
Pp1s23_336V6	4.19011	0.351585	-3.31537	-1.61655		605	35	3	11	18.2537	1.27596	0.100456	0.326114	PF00403	PTHR22814	KOG1603			AT4G10465.1		Heavy metal transport/detoxification superfamily protein					GO:0009507 chloroplast;GO:0030001 metal ion transport;GO:0046872 metal ion binding
Pp1s242_76V6	3.80107	1.69803	-1.4409	0.350281		462	89	11	43	13.9392	3.24459	0.368337	1.27481	PF05743,PF09454	PTHR23306	KOG2391		K12183	AT5G13860.1	ELC-Like	ELCH-like				Endocytosis	GO:0006464 protein modification process;GO:0015031 protein transport;GO:0019787 small conjugating protein ligase activity;GO:0043687 post-translational protein modification;GO:0051246 regulation of protein metabolic process;GO:0000813 ESCRT I complex
Pp1s258_52V6	4.95214	2.55322	-3.90033	0.946384		1026	161	2	65	30.9558	5.86942	0.0669704	1.92704	PF02518,PF00183	PTHR11528	KOG0019		K04079	AT5G52640.1	HSP90.1	heat shock protein 90.1				Protein processing in endoplasmic reticulum;Plant-pathogen interaction	GO:0005524 ATP binding;GO:0009408 response to heat;GO:0046685 response to arsenic-containing substance;GO:0051082 unfolded protein binding;GO:0005515 protein binding;GO:0009816 "defense response to bacterium, incompatible interaction";GO:0042742 defense response to bacterium;GO:0005618 cell wall;GO:0005515 protein binding;GO:0005886 plasma membrane;GO:0005829 cytosol;GO:0005515 protein binding;GO…
Pp1s27_129V6	4.70755	1.96377	0.18713	0.901296		866	107	34	63	26.1284	3.9008	1.1385	1.86774
Pp1s29_323V6	3.99098	1.77689	0.0538632	0.596442		527	94	31	51	15.9003	3.42687	1.03804	1.51198	PF00481	PTHR13832	KOG0698			AT1G68410.2		Protein phosphatase 2C family protein					GO:0003824 catalytic activity;GO:0003824 catalytic activity;GO:0004722 protein serine/threonine phosphatase activity;GO:0005575 cellular_component;GO:0008150 biological_process
Pp1s29_76V6	1.60754	-0.607773	-1.4409	-1.07598		101	18	11	16	3.04731	0.656209	0.368337	0.474348		PTHR22936:SF1				AT1G01550.2	BPS1	Protein of unknown function (DUF793)					GO:0003674 molecular_function;GO:0048364 root development;GO:0048367 shoot development;GO:0005886 plasma membrane;GO:0005886 plasma membrane
Pp1s3_318V6	3.45712	-0.192736	-3.90033	-4.07598		364	24	2	2	10.9824	0.874945	0.0669704	0.0592934	PF00403	PTHR22814	KOG1603			AT1G06330.1		Heavy metal transport/detoxification superfamily protein					GO:0005507 copper ion binding;GO:0005575 cellular_component;GO:0006825 copper ion transport;GO:0030001 metal ion transport;GO:0046872 metal ion binding
Pp1s312_50V6	3.44118	1.41213	0.457219	1.03254		360	73	41	69	10.8617	2.66129	1.37289	2.04562	PF00240,PF00627	PTHR12948	KOG2561			AT2G12550.1		ubiquitin-associated (UBA)/TS-N domain-containing protein
Pp1s318_13V6	5.78616	3.36185	0.385069	1.86653		1829	282	39	123	55.1834	10.2806	1.30592	3.64655	PF08447,PF00989	PTHR23244:SF1				AT2G02710.2	PLPB	PAS/LOV protein B					GO:0000155 two-component sensor activity;GO:0000160 two-component signal transduction system (phosphorelay);GO:0004871 signal transducer activity;GO:0006355 "regulation of transcription, DNA-dependent";GO:0007165 signal transduction
Pp1s34_112V6	6.6062	2.87335	0.347594	2.27274		3229	201	38	163	97.4233	7.32766	1.27244	4.83242	PF01106	PTHR11178	KOG2358			AT5G49940.1	NFU2	NIFU-like protein 2					GO:0005198 structural molecule activity;GO:0009507 chloroplast;GO:0016226 iron-sulfur cluster assembly;GO:0009507 chloroplast;GO:0009658 chloroplast organization;GO:0016226 iron-sulfur cluster assembly;GO:0009507 chloroplast;GO:0009507 chloroplast
Pp1s341_28V6	5.68995	3.37712	0.0996669	1.01148		1711	285	32	68	51.6232	10.39	1.07153	2.01598	PF02825,PF12174					AT1G32230.1	RCD1	WWE protein-protein interaction domain protein family					GO:0005515 protein binding;GO:0005634 nucleus;GO:0006979 response to oxidative stress;GO:0000303 response to superoxide;GO:0009723 response to ethylene stimulus;GO:0009816 "defense response to bacterium, incompatible interaction";GO:0009867 jasmonic acid mediated signaling pathway;GO:0009873 ethylene mediated signaling pathway;GO:0010193 response to ozone;GO:0042542 response to hydrogen peroxide;…
Pp1s342_19V6	2.36718	-0.870808	-3.32193	-1.75406		171	15	0	10	5.1593	0.546841	0	0.296467
Pp1s35_319V6	1.86819	-0.385381	-3.90033	-2.75406		121	21	2	5	3.65074	0.765577	0.0669704	0.148234	PF01842	PTHR13734:SF1				AT1G76990.1	ACR3	ACT domain repeat 3					GO:0006807 nitrogen compound metabolic process;GO:0006807 nitrogen compound metabolic process;GO:0006807 nitrogen compound metabolic process;GO:0006807 nitrogen compound metabolic process;GO:0006807 nitrogen compound metabolic process;GO:0008152 metabolic process;GO:0008152 metabolic process;GO:0008152 metabolic process;GO:0008152 metabolic process;GO:0008152 metabolic process;GO:0005829 cytosol;…
Pp1s357_19V6	1.91511	-0.870808	-3.32193	-1.75406		125	15	0	10	3.77142	0.546841	0	0.296467						AT1G15780.1
Pp1s36_12V6	5.27238	3.12919	1.75788	2.68557		1281	240	101	217	38.6495	8.74945	3.382	6.43334	PF01643					AT4G13050.1		Acyl-ACP thioesterase				Fatty acid biosynthesis	GO:0000036 acyl carrier activity;GO:0006633 fatty acid biosynthetic process;GO:0009507 chloroplast
Pp1s36_150V6	1.59318	-1.07726	-3.32193	-3.32193		100	13	0	0	3.01714	0.473928	0	0	PF07250,PF09118					AT3G53950.1		glyoxal oxidase-related protein					GO:0003674 molecular_function;GO:0008150 biological_process
Pp1s37_28V6	1.81969	-0.690236	-3.32193	-3.32193		117	17	0	0	3.53005	0.619753	0	0	PF00097,PF00400	PTHR22847	KOG0265			AT2G32950.1	COP1	Transducin/WD40 repeat-like superfamily protein				Ubiquitin mediated proteolysis	GO:0009640 photomorphogenesis;GO:0005634 nucleus;GO:0000152 nuclear ubiquitin ligase complex;GO:0005634 nucleus;GO:0009640 photomorphogenesis;GO:0009647 skotomorphogenesis;GO:0005515 protein binding;GO:0005515 protein binding;GO:0005515 protein binding;GO:0005515 protein binding;GO:0005515 protein binding;GO:0005515 protein binding;GO:0005515 protein binding;GO:0005515 protein binding;GO:0005515 …
Pp1s372_55V6	2.7695	-0.690236	-3.31537	-1.16909		226	17	3	15	6.81873	0.619753	0.100456	0.444701	PF00535					AT1G32180.1	CSLD6	cellulose synthase-like D6					GO:0000271 polysaccharide biosynthetic process;GO:0009832 plant-type cell wall biogenesis;GO:0016020 membrane;GO:0016757 "transferase activity, transferring glycosyl groups";GO:0016759 cellulose synthase activity;GO:0016759 cellulose synthase activity;GO:0030244 cellulose biosynthetic process
Pp1s376_34V6	6.54877	4.55992	1.16576	-0.0315894		3103	647	67	33	93.6217	23.5871	2.24351	0.978342						AT5G19900.1		PRLI-interacting factor, putative					GO:0003674 molecular_function;GO:0008150 biological_process
Pp1s38_187V6	2.74374	-0.133842	-3.32193	-1.90606		222	25	0	9	6.69804	0.911401	0	0.266821						AT3G13227.1		serine-rich protein-related					GO:0003674 molecular_function;GO:0005575 cellular_component;GO:0008150 biological_process
Pp1s38_243V6	5.30247	2.92966	-0.578405	2.31633		1308	209	20	168	39.4641	7.61931	0.669704	4.98065	PF08242	PTHR11006	KOG1500	2.1.1.125	K05931	AT3G06930.2	PRMT4B	protein arginine methyltransferase 4B					GO:0008168 methyltransferase activity;GO:0005634 nucleus;GO:0005737 cytoplasm;GO:0008469 histone-arginine N-methyltransferase activity;GO:0009909 regulation of flower development;GO:0010228 vegetative to reproductive phase transition of meristem;GO:0016277 [myelin basic protein]-arginine N-methyltransferase activity;GO:0019919 "peptidyl-arginine methylation, to asymmetrical-dimethyl arginine";GO:…
Pp1s38_53V6	5.8517	3.50307	2.21861	3.14802		1914	311	139	299	57.748	11.3378	4.65444	8.86437	PF00097	PTHR22763				AT3G16720.1	ATL2	TOXICOS EN LEVADURA 2					GO:0008270 zinc ion binding;GO:0008270 zinc ion binding;GO:0006952 defense response;GO:0010200 response to chitin
Pp1s4_134V6	8.89166	6.18303	2.29934	2.10393		15742	1993	147	145	474.958	72.6569	4.92232	4.29877	PF01253	PTHR10388	KOG1770		K03113	AT1G54290.1		Translation initiation factor SUI1 family protein				RNA transport	GO:0003743 translation initiation factor activity;GO:0003743 translation initiation factor activity;GO:0006412 translation;GO:0006413 translational initiation;GO:0006413 translational initiation
Pp1s4_33V6	2.67042	0.176498	-2.57841	-0.906058		211	31	5	18	6.36616	1.13014	0.167426	0.533641	PF02182	PTHR22884:SF20				AT5G47150.1		YDG/SRA domain-containing protein					GO:0003674 molecular_function;GO:0005575 cellular_component;GO:0008150 biological_process
Pp1s42_203V6	1.99372	-0.0772588	-3.90033	-2.26863		132	26	2	7	3.98262	0.947857	0.0669704	0.207527	PF02207,PF00569	PTHR21725	KOG1776	6.3.2.19	K10691	AT3G02260.1	BIG	auxin transport protein (BIG)					GO:0004842 ubiquitin-protein ligase activity;GO:0005488 binding;GO:0008270 zinc ion binding;GO:0048283 indeterminate inflorescence morphogenesis;GO:0009733 response to auxin stimulus;GO:0009926 auxin polar transport;GO:0010311 lateral root formation;GO:0048364 root development;GO:0016020 membrane;GO:0009826 unidimensional cell growth;GO:0048281 inflorescence morphogenesis;GO:0009620 response to f…
Pp1s426_30V6	2.67042	-1.60777	-3.32193	-3.32193		211	9	0	0	6.36616	0.328104	0	0	PF03106					AT5G26170.1	WRKY50	WRKY DNA-binding protein 50					GO:0003700 sequence-specific DNA binding transcription factor activity;GO:0003700 sequence-specific DNA binding transcription factor activity;GO:0003700 sequence-specific DNA binding transcription factor activity;GO:0006355 "regulation of transcription, DNA-dependent";GO:0003700 sequence-specific DNA binding transcription factor activity;GO:0005515 protein binding;GO:0009867 jasmonic acid mediate…
Pp1s45_4V6	3.4768	-0.133842	-2.31537	-0.754055		369	25	6	20	11.1332	0.911401	0.200911	0.592934	PF01152					AT4G32690.1	GLB3	hemoglobin 3					GO:0005575 cellular_component;GO:0001666 response to hypoxia;GO:0005344 oxygen transporter activity;GO:0009733 response to auxin stimulus;GO:0015671 oxygen transport
Pp1s455_6V6	3.85621	0.54423	-3.32193	-1.07598		480	40	0	16	14.4823	1.45824	0	0.474348	PF00627,PF07728,PF00004,PF12002	PTHR13779				AT1G24290.1		AAA-type ATPase family protein					GO:0000166 nucleotide binding;GO:0005524 ATP binding;GO:0005524 ATP binding;GO:0017111 nucleoside-triphosphatase activity
Pp1s48_209V6	2.40876	-0.870808	-2.90033	-3.07598		176	15	4	4	5.31016	0.546841	0.133941	0.118587	PF00646					AT5G46170.1		F-box family protein					GO:0003674 molecular_function;GO:0005575 cellular_component;GO:0010286 heat acclimation
Pp1s5_126V6	5.48654	2.99049	-2.31537	1.84288		1486	218	6	121	44.8346	7.94742	0.200911	3.58725	PF04674					AT5G64260.1	EXL2	EXORDIUM like 2					GO:0003674 molecular_function;GO:0008150 biological_process;GO:0005618 cell wall;GO:0009505 plant-type cell wall;GO:0005829 cytosol
Pp1s5_15V6	2.22545	-0.870808	-3.32193	-1.90606		155	15	0	9	4.67656	0.546841	0	0.266821	PF02190,PF07728,PF00004	PTHR10046	KOG2004	3.4.21.-	K08675	AT5G26860.1	LON1	lon protease 1					GO:0001666 response to hypoxia;GO:0003697 single-stranded DNA binding;GO:0003727 single-stranded RNA binding;GO:0004176 ATP-dependent peptidase activity;GO:0004176 ATP-dependent peptidase activity;GO:0004252 serine-type endopeptidase activity;GO:0005524 ATP binding;GO:0006200 ATP catabolic process;GO:0006515 misfolded or incompletely synthesized protein catabolic process;GO:0007005 mitochondrion …
Pp1s526_2V6	1.83197	-0.607773	-3.32193	-4.07598		118	18	0	2	3.56022	0.656209	0	0.0592934	PF00012	PTHR19375	KOG0100		K03283	AT5G02500.1	HSC70-1	heat shock cognate protein 70-1				Spliceosome;Protein processing in endoplasmic reticulum;Endocytosis	GO:0005524 ATP binding;GO:0005524 ATP binding;GO:0005829 cytosol;GO:0006457 protein folding;GO:0009408 response to heat;GO:0005634 nucleus;GO:0009409 response to cold;GO:0009507 chloroplast;GO:0005730 nucleolus;GO:0009615 response to virus;GO:0022626 cytosolic ribosome;GO:0005515 protein binding;GO:0005515 protein binding;GO:0005618 cell wall;GO:0046686 response to cadmium ion;GO:0005774 vacuolar…
Pp1s57_85V6	4.19962	1.89473	0.559099	0.478605		609	102	44	47	18.3744	3.71852	1.47335	1.3934	PF02519					AT5G20810.2		SAUR-like auxin-responsive protein family				Plant hormone signal transduction	GO:0005516 calmodulin binding;GO:0009733 response to auxin stimulus;GO:0005516 calmodulin binding;GO:0005777 peroxisome;GO:0005777 peroxisome;GO:0005515 protein binding;GO:0005515 protein binding;GO:0005515 protein binding;GO:0005515 protein binding;GO:0005515 protein binding;GO:0005515 protein binding;GO:0005515 protein binding
Pp1s59_53V6	2.67042	0.309764	-1.57841	0.171944		211	34	10	38	6.36616	1.23951	0.334852	1.12658	PF05057	PTHR12482	KOG4372			AT1G29120.1		Hydrolase-like protein family					GO:0003674 molecular_function;GO:0008150 biological_process;GO:0009507 chloroplast;GO:0009507 chloroplast;GO:0009507 chloroplast;GO:0009507 chloroplast;GO:0009507 chloroplast
Pp1s62_171V6	3.67384	0.807264	-3.32193	-0.218003		423	48	0	29	12.7625	1.74989	0	0.859755	PF00122,PF00702	PTHR11939	KOG0210			AT3G27870.1		ATPase E1-E2 type family protein / haloacid dehalogenase-like hydrolase family protein					GO:0006754 ATP biosynthetic process;GO:0008152 metabolic process;GO:0015662 "ATPase activity, coupled to transmembrane movement of ions, phosphorylative mechanism";GO:0015914 phospholipid transport;GO:0016020 membrane;GO:0016021 integral to membrane
Pp1s63_95V6	4.51728	2.05519	0.59152	1.85475		759	114	45	122	22.9001	4.15599	1.50683	3.6169	PF00089	PTHR22939	KOG1320	3.4.21.-	K01362	AT4G18370.1	DEG5	DEGP protease 5					GO:0003824 catalytic activity;GO:0004252 serine-type endopeptidase activity;GO:0006508 proteolysis;GO:0008236 serine-type peptidase activity;GO:0009543 chloroplast thylakoid lumen;GO:0031977 thylakoid lumen;GO:0009543 chloroplast thylakoid lumen;GO:0009579 thylakoid;GO:0009507 chloroplast;GO:0009579 thylakoid;GO:0009543 chloroplast thylakoid lumen;GO:0010206 photosystem II repair;GO:0009507 chlor…
Pp1s65_120V6	3.43314	0.837011	-1.90033	-0.552422		358	49	8	23	10.8013	1.78635	0.267882	0.681875	PF00111					AT1G60950.1	FED A	2Fe-2S ferredoxin-like superfamily protein				Photosynthesis	GO:0009055 electron carrier activity;GO:0051536 iron-sulfur cluster binding;GO:0051537 "2 iron, 2 sulfur cluster binding";GO:0005515 protein binding;GO:0009507 chloroplast;GO:0009767 photosynthetic electron transport chain;GO:0009416 response to light stimulus;GO:0009570 chloroplast stroma;GO:0009767 photosynthetic electron transport chain
Pp1s67_169V6	4.51157	2.19958	-1.31537	-0.906058		756	126	12	18	22.8096	4.59346	0.401822	0.533641	PF00168,PF02893	PTHR23319	KOG1032			AT1G03370.1		C2 calcium/lipid-binding and GRAM domain containing protein					GO:0008150 biological_process
Pp1s70_261V6	2.9266	-0.970344	-2.90033	-1.37554		252	14	4	13	7.60318	0.510385	0.133941	0.385407	PF01842	PTHR13734:SF1				AT1G76990.2	ACR3	ACT domain repeat 3					GO:0006807 nitrogen compound metabolic process;GO:0006807 nitrogen compound metabolic process;GO:0006807 nitrogen compound metabolic process;GO:0006807 nitrogen compound metabolic process;GO:0006807 nitrogen compound metabolic process;GO:0008152 metabolic process;GO:0008152 metabolic process;GO:0008152 metabolic process;GO:0008152 metabolic process;GO:0008152 metabolic process;GO:0005829 cytosol;…
Pp1s74_161V6	2.64281	0.470229	-3.32193	-3.49102		207	38	0	3	6.24547	1.38533	0	0.0889402	PF00249					AT2G01060.1		myb-like HTH transcriptional regulator family protein					GO:0003700 sequence-specific DNA binding transcription factor activity;GO:0003700 sequence-specific DNA binding transcription factor activity;GO:0006355 "regulation of transcription, DNA-dependent"
Pp1s75_252V6	2.34164	0.0802825	-3.32193	-3.32193		168	29	0	0	5.06879	1.05723	0	0	PF07719,PF00515,PF07721	PTHR23083				AT3G04240.1	SEC	Tetratricopeptide repeat (TPR)-like superfamily protein				Other types of O-glycan biosynthesis	GO:0006493 protein O-linked glycosylation;GO:0016757 "transferase activity, transferring glycosyl groups";GO:0016757 "transferase activity, transferring glycosyl groups";GO:0006493 protein O-linked glycosylation;GO:0016757 "transferase activity, transferring glycosyl groups";GO:0016757 "transferase activity, transferring glycosyl groups"
Pp1s80_141V6	2.22545	-0.318267	-3.32193	-2.75406		155	22	0	5	4.67656	0.802033	0	0.148234	PF00293	PTHR12629	KOG2839			AT3G12600.1	NUDT16	nudix hydrolase homolog 16					GO:0016787 hydrolase activity;GO:0016787 hydrolase activity;GO:0016787 hydrolase activity
Pp1s88_68V6	2.57868	0.351585	-2.09298	-1.26863		198	35	7	14	5.97393	1.27596	0.234396	0.415054						AT3G62010.1							GO:0005829 cytosol
Pp1s93_33V6	2.19725	0.129192	-3.32193	-3.32193		152	30	0	0	4.58605	1.09368	0	0	PF03109,PF00144	PTHR10566	KOG1235			AT5G24810.1		ABC1 family protein					GO:0005783 endoplasmic reticulum;GO:0005886 plasma membrane
Pp1s96_95V6	3.26221	0.129192	-1.57841	-1.90606		318	30	10	9	9.59449	1.09368	0.334852	0.266821	PF07714,PF00069	PTHR23257	KOG0192			AT2G17700.1		ACT-like protein tyrosine kinase family protein					GO:0004672 protein kinase activity;GO:0006468 protein phosphorylation;GO:0008152 metabolic process;GO:0004712 protein serine/threonine/tyrosine kinase activity;GO:0005829 cytosol
Pp1s97_106V6	5.00325	1.80726	-3.32193	-1.16909		1063	96	0	15	32.0722	3.49978	0	0.444701	PF00011	PTHR11527	KOG3591			AT4G27670.1	HSP21	heat shock protein 21					GO:0009408 response to heat;GO:0009507 chloroplast;GO:0009408 response to heat;GO:0009644 response to high light intensity;GO:0042542 response to hydrogen peroxide;GO:0009408 response to heat;GO:0009408 response to heat
Pp1s98_14V6	4.39641	1.59734	-1.19989	0.281568		698	83	13	41	21.0596	3.02585	0.435307	1.21552	PF03514					AT1G07530.1	SCL14	SCARECROW-like 14					GO:0003700 sequence-specific DNA binding transcription factor activity;GO:0006355 "regulation of transcription, DNA-dependent";GO:0005634 nucleus;GO:0005829 cytosol;GO:0009410 response to xenobiotic stimulus;GO:0045893 "positive regulation of transcription, DNA-dependent"
Pp1s98_15V6	3.95495	1.89473	-0.730408	-0.491021		514	102	18	24	15.5081	3.71852	0.602733	0.711521	PF04921	PTHR12722	KOG2894		K13119	AT2G21150.1	XCT	XAP5 family protein					GO:0003674 molecular_function;GO:0005634 nucleus;GO:0009637 response to blue light;GO:0010099 regulation of photomorphogenesis;GO:0010114 response to red light;GO:0042752 regulation of circadian rhythm;GO:0009873 ethylene mediated signaling pathway
Pp1s99_12V6	2.19725	0.0802825	-3.32193	-0.218003		152	29	0	29	4.58605	1.05723	0	0.859755	PF00069,PF07714	PTHR22986	KOG0198			AT3G13530.1	MAPKKK7	mitogen-activated protein kinase kinase kinase 7					GO:0004672 protein kinase activity;GO:0004674 protein serine/threonine kinase activity;GO:0005488 binding;GO:0005524 ATP binding;GO:0016301 kinase activity;GO:0005829 cytosol;GO:0005886 plasma membrane;GO:0007009 plasma membrane organization;GO:0009555 pollen development;GO:0005886 plasma membrane
Pp1s1_406V6	2.18773	-1.60777	-3.32193	-2.26863		151	9	0	7	4.55588	0.328104	0	0.207527
Pp1s1_853V6	1.85621	-1.7777	-3.32193	-3.32193		120	8	0	0	3.62056	0.291648	0	0
Pp1s100_108V6	4.43112	2.21099	1.26959	1.43181		715	127	72	91	21.5725	4.62992	2.41093	2.69785	PF04981	PTHR12746	KOG2613		K07562	AT2G03820.1		nonsense-mediated mRNA decay NMD3 family protein				Ribosome biogenesis in eukaryotes;RNA transport	GO:0000184 "nuclear-transcribed mRNA catabolic process, nonsense-mediated decay";GO:0003674 molecular_function;GO:0005829 cytosol
Pp1s104_58V6	4.43112	2.35158	-0.730408	0.946384		715	140	18	65	21.5725	5.10385	0.602733	1.92704	PF02362					AT3G24650.1	ABI3	AP2/B3-like transcriptional factor family protein					GO:0003677 DNA binding;GO:0045893 "positive regulation of transcription, DNA-dependent";GO:0009657 plastid organization;GO:0005515 protein binding;GO:0005515 protein binding;GO:0005515 protein binding;GO:0005515 protein binding;GO:0009790 embryo development;GO:0003700 sequence-specific DNA binding transcription factor activity;GO:0006355 "regulation of transcription, DNA-dependent";GO:0003700 seq…
Pp1s107_77V6	3.7274	-1.97034	-3.32193	-2.26863		439	7	0	7	13.2452	0.255192	0	0.207527	PF02179					AT2G46240.1	BAG6	BCL-2-associated athanogene 6					GO:0006915 apoptosis;GO:0042981 regulation of apoptosis;GO:0005515 protein binding;GO:0005516 calmodulin binding;GO:0012502 induction of programmed cell death;GO:0009408 response to heat;GO:0009409 response to cold;GO:0010228 vegetative to reproductive phase transition of meristem;GO:0050832 defense response to fungus;GO:0009408 response to heat;GO:0009644 response to high light intensity;GO:0042…
Pp1s114_133V6	3.85019	1.59734	-0.376771	0.705376		478	83	23	55	14.4219	3.02585	0.770159	1.63057	PF00232	PTHR10353	KOG0626			AT1G26560.1	BGLU40	beta glucosidase 40				Cyanoamino acid metabolism;Starch and sucrose metabolism;Phenylpropanoid biosynthesis;Biosynthesis of secondary metabolites	GO:0003824 catalytic activity;GO:0004553 "hydrolase activity, hydrolyzing O-glycosyl compounds";GO:0004553 "hydrolase activity, hydrolyzing O-glycosyl compounds";GO:0005975 carbohydrate metabolic process;GO:0043169 cation binding;GO:0009507 chloroplast;GO:0048046 apoplast
Pp1s119_47V6	4.7599	1.88051	-1.09298	1.76951		898	101	14	115	27.0939	3.68206	0.468793	3.40937	PF00324	PTHR11785	KOG1286			AT5G36940.1	CAT3	cationic amino acid transporter 3					GO:0005739 mitochondrion;GO:0006810 transport;GO:0006865 amino acid transport;GO:0015326 cationic amino acid transmembrane transporter activity;GO:0016020 membrane;GO:0055085 transmembrane transport;GO:0015174 basic amino acid transmembrane transporter activity
Pp1s127_40V6	2.94368	-1.19274	-3.32193	-3.32193		255	12	0	0	7.6937	0.437472	0	0						AT5G01750.2		Protein of unknown function (DUF567)					GO:0003674 molecular_function;GO:0008150 biological_process;GO:0009507 chloroplast;GO:0009507 chloroplast
Pp1s13_423V6	2.42506	0.431755	-3.32193	-0.268629		178	37	0	28	5.3705	1.34887	0	0.830108	PF03641					AT3G53450.1		Putative lysine decarboxylase family protein					GO:0003674 molecular_function;GO:0005634 nucleus;GO:0005829 cytosol
Pp1s141_43V6	3.421	0.0296564	-0.730408	0.209419		355	28	18	39	10.7108	1.02077	0.602733	1.15622	PF03946,PF00298	PTHR11661	KOG3257		K02867	AT1G32990.1	PRPL11	plastid ribosomal protein l11				Ribosome	GO:0003735 structural constituent of ribosome;GO:0003735 structural constituent of ribosome;GO:0005840 ribosome;GO:0006412 translation;GO:0022625 cytosolic large ribosomal subunit;GO:0042254 ribosome biogenesis;GO:0009941 chloroplast envelope;GO:0009507 chloroplast;GO:0022626 cytosolic ribosome;GO:0022626 cytosolic ribosome;GO:0009570 chloroplast stroma;GO:0016020 membrane;GO:0009507 chloroplast;…
Pp1s142_86V6	1.85621	-0.607773	-3.32193	-0.552422		120	18	0	23	3.62056	0.656209	0	0.681875	PF03081	PTHR12542	KOG2344		K07195	AT1G72470.1	EXO70D1	exocyst subunit exo70 family protein D1					GO:0000145 exocyst;GO:0006887 exocytosis;GO:0006904 vesicle docking involved in exocytosis;GO:0005829 cytosol
Pp1s165_124V6	3.8771	-0.690236	-2.90033	-1.16909		487	17	4	15	14.6935	0.619753	0.133941	0.444701	PF00773	PTHR23355				AT1G77680.1		Ribonuclease II/R family protein					GO:0003723 RNA binding;GO:0003723 RNA binding;GO:0004540 ribonuclease activity;GO:0004540 ribonuclease activity;GO:0009507 chloroplast
Pp1s199_16V6	4.60217	1.88051	-1.09298	2.12369		805	101	14	147	24.2879	3.68206	0.468793	4.35807	PF08783,PF00097	PTHR15439				AT5G47430.1		DWNN domain, a CCHC-type zinc finger					GO:0003676 nucleic acid binding;GO:0003676 nucleic acid binding;GO:0008150 biological_process;GO:0008270 zinc ion binding;GO:0008270 zinc ion binding;GO:0008270 zinc ion binding
Pp1s212_107V6	5.70254	-1.07726	-3.90033	-0.321096		1726	13	2	27	52.0758	0.473928	0.0669704	0.800462	PF06426,PF00132	PTHR23416:SF6	KOG4750			AT5G56760.1	SERAT1;1	serine acetyltransferase 1;1				Cysteine and methionine metabolism;Sulfur metabolism;Metabolic pathways	GO:0006535 cysteine biosynthetic process from serine;GO:0005829 cytosol;GO:0009001 serine O-acetyltransferase activity;GO:0005829 cytosol
Pp1s215_28V6	3.88006	1.43175	-0.578405	1.26387		488	74	20	81	14.7236	2.69775	0.669704	2.40138	PF00155	PTHR11751	KOG0258	2.6.1.2	K00814	AT1G70580.3	AOAT2	alanine-2-oxoglutarate aminotransferase 2				Alanine, aspartate and glutamate metabolism;Carbon fixation in photosynthetic organisms;Metabolic pathways	GO:0004021 L-alanine:2-oxoglutarate aminotransferase activity;GO:0009853 photorespiration;GO:0005777 peroxisome;GO:0005777 peroxisome;GO:0005777 peroxisome;GO:0005777 peroxisome;GO:0004021 L-alanine:2-oxoglutarate aminotransferase activity;GO:0008453 alanine-glyoxylate transaminase activity;GO:0047958 glycine:2-oxoglutarate aminotransferase activity;GO:0005777 peroxisome;GO:0047958 glycine:2-oxog…
Pp1s219_73V6	4.52675	1.99049	0.0538632	1.93524		764	109	31	129	23.0509	3.97371	1.03804	3.82443	PF09032,PF04969,PF05002	PTHR13164	KOG3260		K04507	AT1G30070.1		SGS domain-containing protein					GO:0003674 molecular_function;GO:0008150 biological_process;GO:0005886 plasma membrane
Pp1s22_253V6	2.38395	0.0296564	-1.57841	0.447578		173	28	10	46	5.21965	1.02077	0.334852	1.36375						AT1G66970.2	SVL2	SHV3-like 2					GO:0006071 glycerol metabolic process;GO:0006071 glycerol metabolic process;GO:0006071 glycerol metabolic process;GO:0006629 lipid metabolic process;GO:0006629 lipid metabolic process;GO:0008889 glycerophosphodiester phosphodiesterase activity;GO:0016301 kinase activity;GO:0031225 anchored to membrane;GO:0031225 anchored to membrane;GO:0046658 anchored to plasma membrane;GO:0009507 chloroplast;GO…
Pp1s220_26V6	2.56403	-1.7777	-3.32193	-3.07598		196	8	0	4	5.91359	0.291648	0	0.118587
Pp1s225_19V6	2.23473	-0.0772588	-1.19989	-0.552422		156	26	13	23	4.70673	0.947857	0.435307	0.681875	PF08137
Pp1s231_32V6	4.14162	1.00366	-0.508016	1.52393		585	55	21	97	17.6502	2.00508	0.703189	2.87573	PF04263,PF04265	PTHR13622	KOG3153			AT2G44750.2	TPK2	thiamin pyrophosphokinase 2				Thiamine metabolism;Metabolic pathways	GO:0004788 thiamine diphosphokinase activity;GO:0006772 thiamine metabolic process;GO:0004788 thiamine diphosphokinase activity;GO:0005829 cytosol;GO:0006772 thiamine metabolic process
Pp1s234_88V6	3.50391	1.39223	0.772092	1.36696		376	72	51	87	11.3444	2.62483	1.70774	2.57926		PTHR10887	KOG1801			AT2G19120.1		P-loop containing nucleoside triphosphate hydrolases superfamily protein					GO:0003674 molecular_function;GO:0008150 biological_process
Pp1s242_98V6	4.28248	0.745863	-0.440902	1.50898		645	46	22	96	19.4605	1.67698	0.736674	2.84609	PF00036	PTHR10891	KOG0027			AT1G66410.1	CAM4	calmodulin 4				Phosphatidylinositol signaling system;Plant-pathogen interaction	GO:0005509 calcium ion binding;GO:0005515 protein binding;GO:0005886 plasma membrane;GO:0005515 protein binding;GO:0005515 protein binding;GO:0005515 protein binding;GO:0005515 protein binding;GO:0005515 protein binding;GO:0005515 protein binding;GO:0005515 protein binding;GO:0005515 protein binding;GO:0005515 protein binding;GO:0005515 protein binding;GO:0005515 protein binding;GO:0005515 protei…
Pp1s26_282V6	1.60754	-0.777698	-3.32193	-1.07598		101	16	0	16	3.04731	0.583297	0	0.474348	PF02701					AT5G60850.1	OBP4	OBF binding protein 4					GO:0003677 DNA binding;GO:0005575 cellular_component;GO:0003700 sequence-specific DNA binding transcription factor activity;GO:0006355 "regulation of transcription, DNA-dependent";GO:0003700 sequence-specific DNA binding transcription factor activity
Pp1s28_126V6	4.35871	2.25572	0.957648	2.29906		680	131	58	166	20.5165	4.77574	1.94214	4.92136	PF03917,PF03199	PTHR11130	KOG0021	6.3.2.3	K01920	AT5G27380.1	GSH2	glutathione synthetase 2				Glutathione metabolism;Metabolic pathways	GO:0004363 glutathione synthase activity;GO:0006750 glutathione biosynthetic process;GO:0005829 cytosol;GO:0009507 chloroplast;GO:0009753 response to jasmonic acid stimulus;GO:0005829 cytosol;GO:0004363 glutathione synthase activity;GO:0005829 cytosol;GO:0004363 glutathione synthase activity;GO:0006750 glutathione biosynthetic process
Pp1s284_71V6	1.71751	-2.45577	-3.32193	-1.75406		109	5	0	10	3.28868	0.18228	0	0.296467	PF02466	PTHR15371				AT2G28900.1	OEP16-1	outer plastid envelope protein 16-1					GO:0008565 protein transporter activity;GO:0015031 protein transport;GO:0015450 P-P-bond-hydrolysis-driven protein transmembrane transporter activity;GO:0009941 chloroplast envelope;GO:0009941 chloroplast envelope;GO:0009507 chloroplast;GO:0005773 vacuole;GO:0009611 response to wounding;GO:0009753 response to jasmonic acid stimulus;GO:0009744 response to sucrose stimulus;GO:0009749 response to gl…
Pp1s295_6V6	5.69836	3.69398	2.45722	3.60701		1721	355	164	411	51.9249	12.9419	5.49157	12.1848	PF00097	PTHR22763				AT5G20910.1	AIP2	RING/U-box superfamily protein					GO:0008270 zinc ion binding;GO:0005515 protein binding;GO:0005634 nucleus;GO:0004842 ubiquitin-protein ligase activity;GO:0016567 protein ubiquitination;GO:0004842 ubiquitin-protein ligase activity;GO:0004842 ubiquitin-protein ligase activity;GO:0005515 protein binding;GO:0005634 nucleus;GO:0005634 nucleus;GO:0005829 cytosol;GO:0005829 cytosol;GO:0009737 response to abscisic acid stimulus;GO:0009…
Pp1s296_56V6	3.32436	-0.777698	-3.32193	-0.121787		332	16	0	31	10.0169	0.583297	0	0.919048	PF03094					AT5G53760.1	MLO11	Seven transmembrane MLO family protein					GO:0005516 calmodulin binding;GO:0005886 plasma membrane;GO:0006952 defense response;GO:0008219 cell death;GO:0008219 cell death;GO:0008219 cell death;GO:0016021 integral to membrane;GO:0016021 integral to membrane
Pp1s32_193V6	2.94368	-1.07726	-3.32193	-0.169093		255	13	0	30	7.6937	0.473928	0	0.889402
Pp1s330_22V6	3.22545	1.05519	0.18713	1.13347		310	57	34	74	9.35312	2.07799	1.1385	2.19386	PF01467	PTHR12039	KOG3199			AT5G55810.1	NMNAT	nicotinate/nicotinamide mononucleotide adenyltransferase				Nicotinate and nicotinamide metabolism;Metabolic pathways	GO:0000309 nicotinamide-nucleotide adenylyltransferase activity;GO:0005575 cellular_component;GO:0009058 biosynthetic process;GO:0000309 nicotinamide-nucleotide adenylyltransferase activity;GO:0004515 nicotinate-nucleotide adenylyltransferase activity;GO:0009435 NAD biosynthetic process;GO:0009555 pollen development;GO:0009860 pollen tube growth
Pp1s333_30V6	4.54365	1.97719	1.38507	2.58223		773	108	78	202	23.3225	3.93725	2.61184	5.98864	PF07250,PF09118					AT3G53950.1		glyoxal oxidase-related protein					GO:0003674 molecular_function;GO:0008150 biological_process
Pp1s34_274V6	1.75668	-1.31827	-3.31537	-0.754055		112	11	3	20	3.37919	0.401016	0.100456	0.592934	PF01063	PTHR11825	KOG0975			AT5G65780.1	ATBCAT-5	branched-chain amino acid aminotransferase 5 / branched-chain amino acid transaminase 5 (BCAT5)				Valine, leucine and isoleucine degradation;Valine, leucine and isoleucine biosynthesis;Pantothenate and CoA biosynthesis;Glucosinolate biosynthesis;Metabolic pathways;Biosynthesis of secondary metabolites	GO:0003824 catalytic activity;GO:0008152 metabolic process;GO:0009081 branched chain family amino acid metabolic process;GO:0004084 branched-chain-amino-acid transaminase activity;GO:0009507 chloroplast;GO:0005739 mitochondrion;GO:0009507 chloroplast
Pp1s38_283V6	4.06827	0.222302	-3.90033	0.651937		556	32	2	53	16.7753	1.16659	0.0669704	1.57128
Pp1s4_323V6	2.82584	-0.022811	-3.31537	0.350281		235	27	3	43	7.09027	0.984313	0.100456	1.27481	PF10539	PTHR23230				AT3G27090.1		DCD (Development and Cell Death) domain protein					GO:0003674 molecular_function;GO:0008150 biological_process
Pp1s47_230V6	5.26221	1.77689	0.421595	3.03254		1272	94	40	276	38.378	3.42687	1.33941	8.1825	PF00097	PTHR23041	KOG1039			AT5G01520.1		RING/U-box superfamily protein					GO:0008270 zinc ion binding;GO:0008270 zinc ion binding
Pp1s47_57V6	3.64281	1.00366	-0.0423521	1.09394		414	55	29	72	12.4909	2.00508	0.97107	2.13456	PF00646,PF01344,PF07646	PTHR23230				AT4G03030.1		Galactose oxidase/kelch repeat superfamily protein					GO:0003674 molecular_function;GO:0008150 biological_process
Pp1s53_36V6	5.33519	3.04248	1.94516	3.24594		1338	226	115	320	40.3693	8.23906	3.8508	9.48695	PF00083,PF07690	PTHR11600	KOG0252		K08176	AT3G54700.1	PHT1;7	phosphate transporter 1;7					GO:0005351 sugar:hydrogen symporter activity;GO:0006810 transport;GO:0006817 phosphate transport;GO:0015114 phosphate transmembrane transporter activity;GO:0015144 carbohydrate transmembrane transporter activity;GO:0016020 membrane;GO:0055085 transmembrane transport;GO:0005886 plasma membrane;GO:0005886 plasma membrane
Pp1s56_136V6	6.92087	3.25572	2.38507	3.1908		4016	262	156	308	121.168	9.55148	5.22369	9.13119						AT3G14280.1							GO:0003674 molecular_function;GO:0008150 biological_process
Pp1s60_190V6	5.69668	1.2223	-2.90033	1.2278		1719	64	4	79	51.8646	2.33319	0.133941	2.34209	PF02179					AT2G46240.1	BAG6	BCL-2-associated athanogene 6					GO:0006915 apoptosis;GO:0042981 regulation of apoptosis;GO:0005515 protein binding;GO:0005516 calmodulin binding;GO:0012502 induction of programmed cell death;GO:0009408 response to heat;GO:0009409 response to cold;GO:0010228 vegetative to reproductive phase transition of meristem;GO:0050832 defense response to fungus;GO:0009408 response to heat;GO:0009644 response to high light intensity;GO:0042…
Pp1s60_221V6	1.86819	-0.607773	-3.32193	-0.552422		121	18	0	23	3.65074	0.656209	0	0.681875	PF00226	PTHR11821	KOG1789			AT2G26890.1	GRV2	DNAJ heat shock N-terminal domain-containing protein					GO:0005488 binding;GO:0006457 protein folding;GO:0031072 heat shock protein binding;GO:0005773 vacuole;GO:0006897 endocytosis;GO:0009660 amyloplast organization;GO:0009958 positive gravitropism;GO:0009959 negative gravitropism;GO:0005792 microsome;GO:0007032 endosome organization;GO:0009793 embryo development ending in seed dormancy;GO:0006623 protein targeting to vacuole;GO:0005770 late endosome…
Pp1s63_208V6	3.17333	0.77689	-0.993443	0.990106		299	47	15	67	9.02124	1.71343	0.502278	1.98633	PF00069	PTHR11295	KOG0668	2.7.11.1	K03097	AT2G23070.1		Protein kinase superfamily protein				Ribosome biogenesis in eukaryotes;Circadian rhythm - plant	GO:0004672 protein kinase activity;GO:0004674 protein serine/threonine kinase activity;GO:0005524 ATP binding;GO:0006468 protein phosphorylation;GO:0016301 kinase activity;GO:0005829 cytosol
Pp1s7_252V6	3.82584	1.30976	-0.0423521	1.63826		470	68	29	105	14.1805	2.47901	0.97107	3.11291	PF12171,PF00096	PTHR13182	KOG2785			AT4G31420.1		Zinc finger protein 622					GO:0003700 sequence-specific DNA binding transcription factor activity;GO:0006355 "regulation of transcription, DNA-dependent"
Pp1s77_228V6	3.93517	1.39223	-1.90033	1.24594		507	72	8	80	15.2969	2.62483	0.267882	2.37174
Pp1s79_167V6	3.32436	0.0802825	-1.09298	1.2278		332	29	14	79	10.0169	1.05723	0.468793	2.34209	PF07977			4.2.1.-	K02372	AT5G10160.1		Thioesterase superfamily protein				Fatty acid biosynthesis;Metabolic pathways	GO:0006633 fatty acid biosynthetic process;GO:0006633 fatty acid biosynthetic process;GO:0016836 hydro-lyase activity;GO:0019171 3-hydroxyacyl-[acyl-carrier-protein] dehydratase activity;GO:0005618 cell wall;GO:0016020 membrane;GO:0009507 chloroplast
Pp1s8_132V6	2.45712	-3.7777	-3.90033	-0.169093		182	2	2	30	5.49119	0.0729121	0.0669704	0.889402
Pp1s83_69V6	7.20051	2.18809	0.347594	3.66548		4875	125	38	428	147.085	4.557	1.27244	12.6888	PF00403,PF00122,PF00702	PTHR11939	KOG0207			AT1G63440.1	HMA5	heavy metal atpase 5					GO:0015662 "ATPase activity, coupled to transmembrane movement of ions, phosphorylative mechanism";GO:0016020 membrane;GO:0016021 integral to membrane;GO:0010273 detoxification of copper ion;GO:0046688 response to copper ion
Pp1s84_106V6	3.17333	-0.777698	-2.57841	0.806659		299	16	5	59	9.02124	0.583297	0.167426	1.74916	PF03106					AT2G46400.1	WRKY46	WRKY DNA-binding protein 46					GO:0003700 sequence-specific DNA binding transcription factor activity;GO:0003700 sequence-specific DNA binding transcription factor activity;GO:0003700 sequence-specific DNA binding transcription factor activity;GO:0006355 "regulation of transcription, DNA-dependent";GO:0003700 sequence-specific DNA binding transcription factor activity;GO:0005730 nucleolus;GO:0010200 response to chitin
Pp1s85_11V6	4.31127	1.37205	-0.256477	1.6922		658	71	25	109	19.8528	2.58838	0.83713	3.23149	PF00011	PTHR11527	KOG0710			AT1G53540.1		HSP20-like chaperones superfamily protein				Protein processing in endoplasmic reticulum	GO:0009408 response to heat
Pp1s96_99V6	2.11925	-0.607773	-3.90033	-0.169093		144	18	2	30	4.34468	0.656209	0.0669704	0.889402	PF08700	PTHR15954	KOG2346			AT4G02030.1		Vps51/Vps67 family (components of vesicular transport) protein					GO:0003674 molecular_function;GO:0008150 biological_process;GO:0005829 cytosol
Pp1s98_70V6	1.71751	-1.60777	-3.31537	-1.07598		109	9	3	16	3.28868	0.328104	0.100456	0.474348	PF01694	PTHR22936	KOG2289			AT2G29050.1	RBL1	RHOMBOID-like 1					GO:0004252 serine-type endopeptidase activity;GO:0004252 serine-type endopeptidase activity;GO:0005794 Golgi apparatus
Pp1s140_93V6	1.81969	-1.19274	-3.32193	-0.616552		117	12	0	22	3.53005	0.437472	0	0.652228	PF02365					AT4G27410.2	RD26	NAC (No Apical Meristem) domain transcriptional regulator superfamily protein					GO:0007275 multicellular organismal development;GO:0003700 sequence-specific DNA binding transcription factor activity;GO:0003700 sequence-specific DNA binding transcription factor activity;GO:0009414 response to water deprivation;GO:0005634 nucleus;GO:0009414 response to water deprivation;GO:0009737 response to abscisic acid stimulus;GO:0045893 "positive regulation of transcription, DNA-dependen…
Pp1s15_49V6	5.85697	1.92274	-3.32193	2.6988		1921	104	0	219	57.9592	3.79143	0	6.49263	PF04783,PF04782	PTHR21450				AT3G51290.2		Protein of unknown function (DUF630) ;Protein of unknown function (DUF632)					GO:0005525 GTP binding;GO:0005622 intracellular;GO:0007264 small GTPase mediated signal transduction;GO:0015031 protein transport
Pp1s151_38V6	3.95495	0.681733	-0.652406	1.01148		514	44	19	68	15.5081	1.60407	0.636219	2.01598	PF00069	PTHR11909	KOG1163			AT4G26100.1	CK1	casein kinase 1					GO:0004672 protein kinase activity;GO:0004674 protein serine/threonine kinase activity;GO:0005524 ATP binding;GO:0006468 protein phosphorylation;GO:0016301 kinase activity;GO:0009506 plasmodesma
Pp1s164_95V6	2.88596	-1.19274	-3.31537	0.316334		245	12	3	42	7.39198	0.437472	0.100456	1.24516	PF00403	PTHR22814	KOG1603
Pp1s175_19V6	4.96195	2.23353	1.89408	2.81276		1033	129	111	237	31.167	4.70283	3.71686	7.02627	PF01095					AT5G19730.1		Pectin lyase-like superfamily protein				Pentose and glucuronate interconversions;Starch and sucrose metabolism;Metabolic pathways	GO:0009505 plant-type cell wall;GO:0030599 pectinesterase activity;GO:0030599 pectinesterase activity;GO:0042545 cell wall modification;GO:0005618 cell wall;GO:0005737 cytoplasm
Pp1s20_280V6	1.88006	-1.31827	-3.32193	-0.552422		122	11	0	23	3.68091	0.401016	0	0.681875	PF00097	PTHR22765				AT3G05200.1	ATL6	RING/U-box superfamily protein					GO:0008270 zinc ion binding;GO:0008270 zinc ion binding;GO:0005886 plasma membrane;GO:0004842 ubiquitin-protein ligase activity;GO:0016567 protein ubiquitination;GO:0005886 plasma membrane;GO:0010200 response to chitin
Pp1s252_24V6	2.06826	-1.31827	-1.4409	-0.0315894		139	11	11	33	4.19382	0.401016	0.368337	0.978342
Pp1s33_380V6	2.45712	-3.32193	-3.32193	-0.906058		182	0	0	18	5.49119	0	0	0.533641	PF00909	PTHR11730	KOG0682			AT1G64780.1	AMT1;2	ammonium transporter 1;2					GO:0006810 transport;GO:0008519 ammonium transmembrane transporter activity;GO:0016020 membrane;GO:0009624 response to nematode;GO:0005886 plasma membrane;GO:0015696 ammonium transport;GO:0015843 methylammonium transport
Pp1s27_248V6	5.1255	2.81476	1.98231	2.0533		1157	193	118	140	34.9083	7.03601	3.95125	4.15054	PF02861,PF00004,PF07724,PF07728,PF10431	PTHR11638	KOG1051			AT5G51070.1	ERD1	Clp ATPase					GO:0000166 nucleotide binding;GO:0005524 ATP binding;GO:0005524 ATP binding;GO:0009507 chloroplast;GO:0016887 ATPase activity;GO:0017111 nucleoside-triphosphatase activity;GO:0009570 chloroplast stroma;GO:0009941 chloroplast envelope;GO:0009507 chloroplast

## Sheet: cluster-2
#Gene	0h log2(TPM)	24h log2(TPM)	48h log2(TPM)	72h log2(TPM)		0h	24h	48h	72h	0h (TPM)	24h (TPM)	48h (TPM)	72h (TPM)	PFAM	Panther	KOG	KEGG ec	KEGG Orthology	best arabidopsis TAIR10 hit name	best arabidopsis TAIR10 hit symbol	best arabidopsis TAIR10 hit defline	best rice hit name	best rice hit symbol	best rice hit defline	Pathway	Go_terms
Pp1s113_117V6	-0.465714	2.77689	-3.90033	-3.32193		24	188	2	0	0.724113	6.85373	0.0669704	0	PF00999	PTHR10110	KOG1965			AT3G05030.1	NHX2	sodium hydrogen exchanger 2					GO:0006812 cation transport;GO:0006812 cation transport;GO:0006814 sodium ion transport;GO:0006814 sodium ion transport;GO:0006814 sodium ion transport;GO:0006885 regulation of pH;GO:0006885 regulation of pH;GO:0015081 sodium ion transmembrane transporter activity;GO:0015385 sodium:hydrogen antiporter activity;GO:0055085 transmembrane transport;GO:0055085 transmembrane transport
Pp1s130_124V6	-3.32193	2.23353	-3.32193	-0.218003		0	129	0	29	0	4.70283	0	0.859755
Pp1s133_26V6	0.704211	2.88051	0.0996669	-0.754055		54	202	32	20	1.62925	7.36412	1.07153	0.592934	PF01302,PF00560	PTHR15140	KOG3207			AT1G71440.1	PFI	tubulin folding cofactor E / Pfifferling (PFI)					GO:0009793 embryo development ending in seed dormancy;GO:0000910 cytokinesis;GO:0007021 tubulin complex assembly;GO:0009507 chloroplast
Pp1s142_79V6	1.11925	3.30445	-2.31537	0.350281		72	271	6	43	2.17234	9.87959	0.200911	1.27481	PF03714,PF02922,PF11852	PTHR10357	KOG0470			AT5G04360.1	LDA	limit dextrinase					GO:0004556 alpha-amylase activity;GO:0005975 carbohydrate metabolic process;GO:0009507 chloroplast;GO:0010303 limit dextrinase activity;GO:0005983 starch catabolic process;GO:0009507 chloroplast;GO:0005983 starch catabolic process;GO:0019252 starch biosynthetic process;GO:0051060 pullulanase activity;GO:0005983 starch catabolic process
Pp1s15_309V6	2.21611	4.83517	-3.90033	-0.552422		154	783	2	23	4.64639	28.5451	0.0669704	0.681875	PF03097					AT1G73390.3		Endosomal targeting BRO1-like domain-containing protein					GO:0003674 molecular_function
Pp1s157_44V6	5.87488	7.87828	5.16979	5.85105		1945	6454	1075	1947	58.6833	235.287	35.9966	57.7222	PF02466	PTHR14110				AT4G16160.1	ATOEP16-2	Mitochondrial import inner membrane translocase subunit Tim17/Tim22/Tim23 family protein					GO:0005744 mitochondrial inner membrane presequence translocase complex;GO:0008565 protein transporter activity;GO:0008565 protein transporter activity;GO:0015031 protein transport;GO:0015031 protein transport;GO:0015031 protein transport;GO:0015450 P-P-bond-hydrolysis-driven protein transmembrane transporter activity;GO:0009527 plastid outer membrane
Pp1s163_127V6	1.81969	5.25848	-1.4409	1.28157		117	1050	11	82	3.53005	38.2788	0.368337	2.43103	PF01063	PTHR11825	KOG0975	2.6.1.42	K00826	AT5G65780.1	ATBCAT-5	branched-chain amino acid aminotransferase 5 / branched-chain amino acid transaminase 5 (BCAT5)				Valine, leucine and isoleucine degradation;Valine, leucine and isoleucine biosynthesis;Pantothenate and CoA biosynthesis;Glucosinolate biosynthesis;Metabolic pathways;Biosynthesis of secondary metabolites	GO:0003824 catalytic activity;GO:0008152 metabolic process;GO:0009081 branched chain family amino acid metabolic process;GO:0004084 branched-chain-amino-acid transaminase activity;GO:0009507 chloroplast;GO:0005739 mitochondrion;GO:0009507 chloroplast
Pp1s19_224V6	-3.05068	1.92274	-1.57841	-2.49102		4	104	10	6	0.120685	3.79143	0.334852	0.17788	PF04508					AT1G50660.1							GO:0008150 biological_process;GO:0009507 chloroplast
Pp1s194_189V6	0.704211	3.4844	-1.57841	-1.26863		54	307	10	14	1.62925	11.192	0.334852	0.415054	PF00560	PTHR10588				AT4G03260.2		Outer arm dynein light chain 1 protein					GO:0004674 protein serine/threonine kinase activity;GO:0046777 protein autophosphorylation
Pp1s197_40V6	-0.527114	2.63169	-0.652406	-1.07598		23	170	19	16	0.693941	6.19753	0.636219	0.474348	PF03737					AT5G56260.1		Ribonuclease E inhibitor RraA/Dimethylmenaquinone methyltransferase					GO:0005575 cellular_component;GO:0008428 ribonuclease inhibitor activity;GO:0051252 regulation of RNA metabolic process
Pp1s2_113V6	1.9266	5.5919	-0.0423521	2.35864		126	1323	29	173	3.80159	48.2313	0.97107	5.12888	PF01053	PTHR11808	KOG0053	4.4.1.11	K01761	AT1G64660.1	MGL	methionine gamma-lyase				Cysteine and methionine metabolism;Selenoamino acid metabolism	GO:0003824 catalytic activity;GO:0006520 cellular amino acid metabolic process;GO:0005829 cytosol;GO:0018826 methionine gamma-lyase activity;GO:0019458 methionine catabolic process via 2-oxobutanoate
Pp1s2_779V6	3.53429	6.2412	4.13033	3.41186		384	2075	523	359	11.5858	75.6463	17.5128	10.6432	PF01679	PTHR21659	KOG1773			AT2G38905.1		Low temperature and salt responsive protein family					GO:0009409 response to cold;GO:0012505 endomembrane system;GO:0016021 integral to membrane;GO:0042538 hyperosmotic salinity response
Pp1s22_107V6	-2.72875	3.78454	-2.09298	-1.49102		5	378	7	12	0.150857	13.7804	0.234396	0.355761						AT2G21820.1							GO:0003674 molecular_function;GO:0005575 cellular_component;GO:0008150 biological_process
Pp1s25_371V6	-3.32193	1.88051	-3.32193	-2.49102		0	101	0	6	0	3.68206	0	0.17788
Pp1s40_9V6	-0.658359	4.94682	0.18713	-1.07598		21	846	34	16	0.633599	30.8418	1.1385	0.474348	PF01274	PTHR21631	KOG1261	2.3.3.9	K01638	AT5G03860.2	MLS	malate synthase				Pyruvate metabolism;Glyoxylate and dicarboxylate metabolism;Metabolic pathways	GO:0006097 glyoxylate cycle;GO:0006097 glyoxylate cycle;GO:0004474 malate synthase activity
Pp1s421_9V6	-4.05068	4.81663	0.18713	0.830907		2	773	34	60	0.0603427	28.1805	1.1385	1.7788	PF00257					AT1G20440.1	COR47	cold-regulated 47					GO:0003674 molecular_function;GO:0006950 response to stress;GO:0009415 response to water;GO:0009737 response to abscisic acid stimulus;GO:0006970 response to osmotic stress;GO:0009414 response to water deprivation;GO:0009631 cold acclimation;GO:0009409 response to cold;GO:0010286 heat acclimation;GO:0009631 cold acclimation;GO:0050832 defense response to fungus;GO:0005829 cytosol;GO:0009409 respo…
Pp1s65_4V6	-0.40682	2.33083	-3.32193	-3.07598		25	138	0	4	0.754284	5.03093	0	0.118587	PF00730,PF00633,PF10576	PTHR10359	KOG1921	4.2.99.18	K10773	AT1G05900.2	NTH2	endonuclease III 2				Base excision repair	GO:0006284 base-excision repair;GO:0006284 base-excision repair;GO:0019104 DNA N-glycosylase activity;GO:0042644 chloroplast nucleoid
Pp1s69_54V6	-0.963213	1.88051	-0.376771	-0.552422		17	101	23	23	0.512913	3.68206	0.770159	0.681875	PF00817,PF11799	PTHR11076		2.7.7.7	K03509	AT5G44740.2	POLH	Y-family DNA polymerase H					GO:0006281 DNA repair;GO:0012505 endomembrane system;GO:0003887 DNA-directed DNA polymerase activity;GO:0005515 protein binding;GO:0005515 protein binding;GO:0010224 response to UV-B;GO:0042276 error-prone translesion synthesis
Pp1s76_39V6	-0.880751	2.40221	-3.32193	-3.32193		18	145	0	0	0.543085	5.28613	0	0	PF01370	PTHR10366	KOG1502			AT5G19440.1		NAD(P)-binding Rossmann-fold superfamily protein					GO:0004022 alcohol dehydrogenase (NAD) activity;GO:0005886 plasma membrane;GO:0005829 cytosol
Pp1s77_22V6	-0.963213	1.99049	-2.09298	-1.61655		17	109	7	11	0.512913	3.97371	0.234396	0.326114	PF00067	PTHR19383	KOG0157			AT4G13310.1	CYP71A20	cytochrome P450, family 71, subfamily A, polypeptide 20				Limonene and pinene degradation;Stilbenoid, diarylheptanoid and gingerol biosynthesis;Metabolic pathways;Biosynthesis of secondary metabolites	GO:0004497 monooxygenase activity;GO:0004497 monooxygenase activity;GO:0005506 iron ion binding;GO:0005506 iron ion binding;GO:0009055 electron carrier activity;GO:0009055 electron carrier activity;GO:0019825 oxygen binding;GO:0020037 heme binding;GO:0020037 heme binding;GO:0055114 oxidation-reduction process;GO:0055114 oxidation-reduction process
Pp1s92_87V6	-0.880751	2.7692	-3.32193	-1.90606		18	187	0	9	0.543085	6.81728	0	0.266821
Pp1s10_147V6	-3.46571	4.23911	-3.32193	1.8898		3	518	0	125	0.0905141	18.8842	0	3.70584
Pp1s10_408V6	-2.46571	3.18809	-2.31537	-0.988521		6	250	6	17	0.181028	9.11401	0.200911	0.503994	PF00415	PTHR22870				AT3G55580.1		Regulator of chromosome condensation (RCC1) family protein					GO:0005488 binding;GO:0005575 cellular_component;GO:0008150 biological_process
Pp1s104_29V6	-3.32193	2.04248	-2.57841	-2.07598		0	113	5	8	0	4.11953	0.167426	0.237174	PF03357	PTHR10476	KOG3229		K12193	AT5G22950.1	VPS24.1	SNF7 family protein				Endocytosis	GO:0016192 vesicle-mediated transport;GO:0000815 ESCRT III complex
Pp1s119_27V6	-1.59124	4.35158	-1.4409	0.678904		11	560	11	54	0.331885	20.4154	0.368337	1.60092	PF05512					AT1G04560.1		AWPM-19-like family protein					GO:0003674 molecular_function;GO:0008150 biological_process;GO:0012505 endomembrane system
Pp1s12_184V6	0.158777	2.18809	-3.32193	-1.61655		37	125	0	11	1.11634	4.557	0	0.326114	PF00515,PF07719,PF00856,PF01753	PTHR22904	KOG2084			AT1G33400.1		Tetratricopeptide repeat (TPR)-like superfamily protein					GO:0005488 binding;GO:0005575 cellular_component;GO:0008150 biological_process
Pp1s12_269V6	0.341641	2.58862	-0.900333	-1.16909		42	165	16	15	1.2672	6.01525	0.535763	0.444701	PF00439	PTHR22880				AT2G34900.1	IMB1	Transcription factor GTE6					GO:0003677 DNA binding;GO:0005634 nucleus;GO:0010030 positive regulation of seed germination;GO:0045893 "positive regulation of transcription, DNA-dependent"
Pp1s120_13V6	-1.59124	3.68173	0.0538632	0.567873		11	352	31	50	0.331885	12.8325	1.03804	1.48234	PF00847					AT1G75490.1		Integrase-type DNA-binding superfamily protein					GO:0003677 DNA binding;GO:0003700 sequence-specific DNA binding transcription factor activity;GO:0005634 nucleus;GO:0006355 "regulation of transcription, DNA-dependent";GO:0003700 sequence-specific DNA binding transcription factor activity;GO:0010200 response to chitin
Pp1s120_155V6	2.69079	4.99049	2.43058	2.44758		214	872	161	184	6.45667	31.7897	5.39112	5.455
Pp1s121_15V6	-3.32193	2.49843	-2.31537	-1.26863		0	155	6	14	0	5.65069	0.200911	0.415054						AT1G52855.1							GO:0003674 molecular_function;GO:0003674 molecular_function;GO:0005575 cellular_component;GO:0008150 biological_process
Pp1s122_142V6	2.07861	4.27758	1.14406	0.171944		140	532	66	38	4.22399	19.3946	2.21002	1.12658
Pp1s126_82V6	-0.00628214	2.29912	-2.90033	-2.49102		33	135	4	6	0.995655	4.92156	0.133941	0.17788	PF00202	PTHR11986	KOG1402	2.6.1.13	K00819	AT5G46180.1	DELTA-OAT	ornithine-delta-aminotransferase				Arginine and proline metabolism;Metabolic pathways;Biosynthesis of secondary metabolites	GO:0004587 ornithine-oxo-acid transaminase activity;GO:0004587 ornithine-oxo-acid transaminase activity;GO:0005739 mitochondrion;GO:0006561 proline biosynthetic process;GO:0006593 ornithine catabolic process;GO:0019544 arginine catabolic process to glutamate;GO:0008270 zinc ion binding;GO:0004587 ornithine-oxo-acid transaminase activity;GO:0006561 proline biosynthetic process;GO:0042538 hyperosmo…
Pp1s13_349V6	-1.88075	3.04248	-3.32193	-2.75406		9	226	0	5	0.271542	8.23906	0	0.148234
Pp1s134_58V6	0.158777	2.09267	-2.90033	0.13347		37	117	4	37	1.11634	4.26536	0.133941	1.09693	PF00233	PTHR11347
Pp1s136_49V6	0.564034	2.66525	0.421595	0.705376		49	174	40	55	1.4784	6.34335	1.33941	1.63057	PF00646					AT5G15710.1		Galactose oxidase/kelch repeat superfamily protein					GO:0003674 molecular_function;GO:0008150 biological_process
Pp1s137_152V6	-0.40682	3.12919	-1.57841	-0.616552		25	240	10	22	0.754284	8.74945	0.334852	0.652228	PF00415	PTHR22870				AT3G53830.1		Regulator of chromosome condensation (RCC1) family protein					GO:0003682 chromatin binding;GO:0005575 cellular_component;GO:0008150 biological_process;GO:0008536 Ran GTPase binding
Pp1s142_10V6	1.73068	4.68378	-1.31537	0.968411		110	705	12	66	3.31885	25.7015	0.401822	1.95668	PF03619	PTHR23423	KOG2641			AT1G77220.1		Protein of unknown function (DUF300)					GO:0008150 biological_process
Pp1s145_135V6	-2.24332	2.30976	-2.90033	-0.988521		7	136	4	17	0.2112	4.95802	0.133941	0.503994	PF03070	PTHR20858				AT3G16990.1		Haem oxygenase-like, multi-helical					GO:0003674 molecular_function;GO:0005575 cellular_component
Pp1s145_136V6	-4.05068	2.10494	-3.32193	-2.75406		2	118	0	5	0.0603427	4.30181	0	0.148234	PF00168,PF02893	PTHR23319	KOG1032			AT1G03370.1		C2 calcium/lipid-binding and GRAM domain containing protein					GO:0008150 biological_process
Pp1s146_82V6	1.37559	4.08649	-0.900333	-0.552422		86	466	16	23	2.59474	16.9885	0.535763	0.681875	PF06749					AT1G61065.1		Protein of unknown function (DUF1218)					GO:0003674 molecular_function;GO:0008150 biological_process;GO:0012505 endomembrane system
Pp1s155_57V6	0.271252	2.35158	-0.578405	-0.683666		40	140	20	21	1.20685	5.10385	0.669704	0.622581
Pp1s163_16V6	-0.658359	1.86616	-1.73041	-0.552422		21	100	9	23	0.633599	3.6456	0.301367	0.681875	PF08263,PF00560,PF00069,PF07714	PTHR23258	KOG1187			AT1G06840.1		Leucine-rich repeat protein kinase family protein					GO:0004672 protein kinase activity;GO:0004674 protein serine/threonine kinase activity;GO:0004674 protein serine/threonine kinase activity;GO:0005524 ATP binding;GO:0005524 ATP binding;GO:0006468 protein phosphorylation;GO:0007169 transmembrane receptor protein tyrosine kinase signaling pathway;GO:0005886 plasma membrane;GO:0005886 plasma membrane;GO:0016020 membrane
Pp1s168_73V6	-0.295789	3.22793	-1.09298	0.350281		27	257	14	43	0.814627	9.3692	0.468793	1.27481	PF04927					AT3G22490.1		Seed maturation protein					GO:0003674 molecular_function;GO:0005575 cellular_component;GO:0009793 embryo development ending in seed dormancy
Pp1s169_138V6	-4.05068	2.00366	-3.32193	-1.75406		2	110	0	10	0.0603427	4.01016	0	0.296467	PF00676	PTHR11516				AT1G24180.1	IAR4	Thiamin diphosphate-binding fold (THDP-binding) superfamily protein				Glycolysis / Gluconeogenesis;Citrate cycle (TCA cycle);Valine, leucine and isoleucine biosynthesis;Pyruvate metabolism;Butanoate metabolism;Metabolic pathways;Biosynthesis of secondary metabolites	GO:0004739 pyruvate dehydrogenase (acetyl-transferring) activity;GO:0008152 metabolic process;GO:0005739 mitochondrion;GO:0005739 mitochondrion;GO:0009651 response to salt stress;GO:0005739 mitochondrion;GO:0005634 nucleus;GO:0005829 cytosol;GO:0008270 zinc ion binding;GO:0050897 cobalt ion binding
Pp1s169_45V6	-0.658359	2.42197	-1.90033	-2.07598		21	147	8	8	0.633599	5.35904	0.267882	0.237174	PF06911	PTHR21068				AT4G35985.1		Senescence/dehydration-associated protein-related
Pp1s171_10V6	-0.591245	2.82221	-2.31537	-3.32193		22	194	6	0	0.66377	7.07247	0.200911	0	PF04117	PTHR11266	KOG1944			AT1G52870.2		Peroxisomal membrane 22 kDa (Mpv17/PMP22) family protein					GO:0003674 molecular_function;GO:0008150 biological_process;GO:0009507 chloroplast;GO:0009507 chloroplast;GO:0016021 integral to membrane;GO:0016021 integral to membrane
Pp1s180_121V6	0.782214	3.19958	-1.73041	1.26387		57	252	9	81	1.71977	9.18692	0.301367	2.40138
Pp1s180_52V6	0.677244	4.24467	-0.315371	1.33341		53	520	24	85	1.59908	18.9571	0.803645	2.51997						AT2G13840.1		Polymerase/histidinol phosphatase-like					GO:0003677 DNA binding;GO:0003677 DNA binding;GO:0003824 catalytic activity;GO:0003887 DNA-directed DNA polymerase activity;GO:0003887 DNA-directed DNA polymerase activity;GO:0005575 cellular_component;GO:0006260 DNA replication;GO:0006260 DNA replication
Pp1s187_20V6	1.48848	5.07405	-0.578405	0.830907		93	924	20	60	2.80594	33.6854	0.669704	1.7788
Pp1s190_85V6	-0.192695	1.86616	-1.73041	-2.07598		29	100	9	8	0.87497	3.6456	0.301367	0.237174	PF01138,PF03725	PTHR11953	KOG1069		K12590	AT3G46210.3		Ribosomal protein S5 domain 2-like superfamily protein				RNA degradation	GO:0000175 3'-5'-exoribonuclease activity;GO:0000175 3'-5'-exoribonuclease activity;GO:0000175 3'-5'-exoribonuclease activity;GO:0000175 3'-5'-exoribonuclease activity;GO:0000175 3'-5'-exoribonuclease activity;GO:0000175 3'-5'-exoribonuclease activity;GO:0000175 3'-5'-exoribonuclease activity;GO:0003723 RNA binding;GO:0003723 RNA binding;GO:0003723 RNA binding;GO:0003723 RNA binding;GO:0003723 RN…
Pp1s194_12V6	2.57138	4.90705	2.90057	2.29906		197	823	223	166	5.94376	30.0033	7.4672	4.92136		PTHR12924			K13249	AT2G21160.1		Translocon-associated protein (TRAP), alpha subunit				Protein processing in endoplasmic reticulum	GO:0008150 biological_process;GO:0005773 vacuole;GO:0009535 chloroplast thylakoid membrane;GO:0009535 chloroplast thylakoid membrane;GO:0005773 vacuole;GO:0005783 endoplasmic reticulum;GO:0005774 vacuolar membrane;GO:0005774 vacuolar membrane;GO:0005886 plasma membrane;GO:0005886 plasma membrane;GO:0005886 plasma membrane;GO:0005886 plasma membrane
Pp1s196_53V6	0.704211	4.11409	-3.90033	-2.49102		54	475	2	6	1.62925	17.3166	0.0669704	0.17788	PF00484	PTHR11002	KOG1578			AT5G14740.2	CA2	carbonic anhydrase 2				Nitrogen metabolism	GO:0004089 carbonate dehydratase activity;GO:0004089 carbonate dehydratase activity;GO:0004089 carbonate dehydratase activity;GO:0004089 carbonate dehydratase activity;GO:0004089 carbonate dehydratase activity;GO:0004089 carbonate dehydratase activity;GO:0008270 zinc ion binding;GO:0008270 zinc ion binding;GO:0008270 zinc ion binding;GO:0008270 zinc ion binding;GO:0008270 zinc ion binding;GO:0008…
Pp1s198_7V6	-1.14379	4.04248	0.827587	0.990106		15	452	53	67	0.45257	16.4781	1.77471	1.98633	PF00067	PTHR19383	KOG0156	1.14.-.-	K00517	AT5G07990.1	TT7	Cytochrome P450 superfamily protein				Flavonoid biosynthesis;Flavone and flavonol biosynthesis;Metabolic pathways;Biosynthesis of secondary metabolites	GO:0016711 flavonoid 3'-monooxygenase activity;GO:0019825 oxygen binding;GO:0009411 response to UV;GO:0009813 flavonoid biosynthetic process;GO:0016711 flavonoid 3'-monooxygenase activity;GO:0009733 response to auxin stimulus
Pp1s2_432V6	-0.963213	2.37205	-3.32193	0.0939415		17	142	0	36	0.512913	5.17676	0	1.06728			KOG4629			AT1G53470.1	MSL4	mechanosensitive channel of small conductance-like 4					GO:0016020 membrane;GO:0055085 transmembrane transport;GO:0005886 plasma membrane;GO:0005886 plasma membrane
Pp1s211_95V6	-3.05068	4.29912	1.18713	1.31633		4	540	68	84	0.120685	19.6863	2.27699	2.49032	PF08256
Pp1s224_13V6	-3.32193	3.16482	-3.32193	-3.07598		0	246	0	4	0	8.96818	0	0.118587
Pp1s23_172V6	1.01541	3.28839	0.714377	1.13347		67	268	49	74	2.02148	9.77022	1.64077	2.19386	PF01764					AT3G61680.1		alpha/beta-Hydrolases superfamily protein					GO:0004806 triglyceride lipase activity;GO:0004806 triglyceride lipase activity;GO:0006629 lipid metabolic process;GO:0006629 lipid metabolic process;GO:0009507 chloroplast
Pp1s237_29V6	3.48848	5.85257	2.72172	2.99548		372	1585	197	269	11.2237	57.7828	6.59658	7.97497	PF00171	PTHR11699	KOG2453	1.2.1.3,1.2.1.31,1.2.1.8	K14085	AT1G54100.1	ALDH7B4	aldehyde dehydrogenase 7B4				Glycolysis / Gluconeogenesis;Ascorbate and aldarate metabolism;Fatty acid metabolism;Glycine, serine and threonine metabolism;Valine, leucine and isoleucine degradation;Lysine biosynthesis;Lysine degradation;Arginine and proline metabolism;Histidine metabolism;Tryptophan metabolism;beta-Alanine metabolism;Glycerolipid metabolism;Pyruvate metabolism;Propanoate metabolism;Metabolic pathways;Biosynt…	GO:0004028 3-chloroallyl aldehyde dehydrogenase activity;GO:0016491 oxidoreductase activity;GO:0016491 oxidoreductase activity;GO:0009269 response to desiccation;GO:0009651 response to salt stress;GO:0009737 response to abscisic acid stimulus;GO:0005829 cytosol;GO:0005829 cytosol
Pp1s238_73V6	-3.32193	3.25572	-0.993443	-2.07598		0	262	15	8	0	9.55148	0.502278	0.237174
Pp1s24_249V6	1.42506	3.44147	-0.900333	0.806659		89	298	16	59	2.68525	10.8639	0.535763	1.74916		PTHR12526:SF41				AT1G75420.1		UDP-Glycosyltransferase superfamily protein					GO:0005575 cellular_component;GO:0009058 biosynthetic process;GO:0016757 "transferase activity, transferring glycosyl groups";GO:0016757 "transferase activity, transferring glycosyl groups"
Pp1s25_135V6	1.69079	5.12166	-3.90033	-1.49102		107	955	2	12	3.22834	34.8155	0.0669704	0.355761	PF06522					AT3G48140.1		B12D protein					GO:0003674 molecular_function;GO:0010150 leaf senescence;GO:0005777 peroxisome
Pp1s25_161V6	-1.72875	2.24467	-0.652406	-0.616552		10	130	19	22	0.301714	4.73928	0.636219	0.652228
Pp1s263_45V6	0.119249	4.29912	0.623229	1.07376		36	540	46	71	1.08617	19.6863	1.54032	2.10492	PF00036	PTHR10891	KOG0027		K13448	AT1G24620.1		EF hand calcium-binding protein family				Plant-pathogen interaction	GO:0005509 calcium ion binding;GO:0005509 calcium ion binding;GO:0005634 nucleus;GO:0009409 response to cold;GO:0005737 cytoplasm;GO:0048767 root hair elongation
Pp1s263_50V6	0.234726	3.12317	0.654256	-0.0315894		39	239	47	33	1.17668	8.71299	1.5738	0.978342	PF00036	PTHR10891	KOG0027		K13448	AT1G66400.1	CML23	calmodulin like 23				Plant-pathogen interaction	GO:0005509 calcium ion binding;GO:0005509 calcium ion binding;GO:0009909 regulation of flower development;GO:0080164 regulation of nitric oxide metabolic process
Pp1s263_60V6	0.306876	2.96377	-2.31537	0.756907		41	214	6	57	1.23703	7.80159	0.200911	1.68986	PF00892					AT3G45870.1		nodulin MtN21 /EamA-like transporter family protein					GO:0016020 membrane
Pp1s270_82V6	0.408755	3.88408	-2.09298	-1.75406		44	405	7	10	1.32754	14.7647	0.234396	0.296467	PF00005,PF01061	PTHR19241	KOG0061			AT1G31770.1	ABCG14	ATP-binding cassette 14					GO:0042626 "ATPase activity, coupled to transmembrane movement of substances"
Pp1s276_11V6	-0.350237	2.10494	-3.90033	-0.552422		26	118	2	23	0.784455	4.30181	0.0669704	0.681875	PF07823					AT4G18930.1		RNA ligase/cyclic nucleotide phosphodiesterase family protein					GO:0004112 cyclic-nucleotide phosphodiesterase activity;GO:0005737 cytoplasm;GO:0006388 "tRNA splicing, via endonucleolytic cleavage and ligation"
Pp1s284_27V6	-2.46571	4.57103	0.98231	0.478605		6	652	59	47	0.181028	23.7693	1.97563	1.3934						AT3G03341.1
Pp1s291_22V6	1.75668	5.44871	0.854554	2.87821		112	1198	54	248	3.37919	43.6743	1.8082	7.35239	PF05564					AT1G28330.3	DYL1	dormancy-associated protein-like 1					GO:0003674 molecular_function;GO:0005575 cellular_component;GO:0009744 response to sucrose stimulus;GO:0009749 response to glucose stimulus;GO:0009750 response to fructose stimulus
Pp1s295_29V6	-3.05068	2.05519	-2.57841	-3.32193		4	114	5	0	0.120685	4.15599	0.167426	0
Pp1s298_75V6	-1.35024	2.84435	-1.57841	-3.32193		13	197	10	0	0.392228	7.18184	0.334852	0	PF11204,PF04749					AT5G05350.1		PLAC8 family protein					GO:0003674 molecular_function;GO:0008150 biological_process;GO:0009507 chloroplast
Pp1s302_43V6	-1.14379	2.06779	-2.57841	-0.906058		15	115	5	18	0.45257	4.19244	0.167426	0.533641	PF08323,PF00534	PTHR12526				AT4G18240.1	SS4	starch synthase 4					GO:0016757 "transferase activity, transferring glycosyl groups";GO:0016757 "transferase activity, transferring glycosyl groups";GO:0009507 chloroplast;GO:0005982 starch metabolic process;GO:0009507 chloroplast
Pp1s31_237V6	-0.728748	3.09267	0.421595	0.447578		20	234	40	46	0.603427	8.53071	1.33941	1.36375	PF01764					AT3G07400.1		lipase class 3 family protein					GO:0004806 triglyceride lipase activity;GO:0004806 triglyceride lipase activity;GO:0006629 lipid metabolic process;GO:0006629 lipid metabolic process
Pp1s31_85V6	-0.243321	2.19958	-3.90033	-1.07598		28	126	2	16	0.844798	4.59346	0.0669704	0.474348	PF01135,PF08241	PTHR11579	KOG1661	2.1.1.77	K00573	AT3G48330.2	PIMT1	protein-l-isoaspartate methyltransferase 1					GO:0004719 protein-L-isoaspartate (D-aspartate) O-methyltransferase activity;GO:0004719 protein-L-isoaspartate (D-aspartate) O-methyltransferase activity;GO:0004719 protein-L-isoaspartate (D-aspartate) O-methyltransferase activity;GO:0006464 protein modification process;GO:0005737 cytoplasm;GO:0007568 aging;GO:0009651 response to salt stress;GO:0009737 response to abscisic acid stimulus;GO:000984…
Pp1s32_194V6	-3.46571	2.21099	-2.57841	-0.552422		3	127	5	23	0.0905141	4.62992	0.167426	0.681875	PF06203					AT5G14370.1		CCT motif family protein					GO:0009507 chloroplast
Pp1s32_209V6	-4.05068	7.07873	-0.900333	-0.552422		2	3708	16	23	0.0603427	135.179	0.535763	0.681875	PF02469	PTHR10900:SF12
Pp1s321_14V6	2.89184	5.21807	2.49198	2.20014		246	1021	168	155	7.42216	37.2216	5.62551	4.59524
Pp1s335_58V6	-2.05068	4.66317	-0.81287	0.0939415		8	695	17	36	0.241371	25.3369	0.569248	1.06728						AT1G49000.1							GO:0003674 molecular_function;GO:0008150 biological_process;GO:0009507 chloroplast
Pp1s335_78V6	-1.59124	4.15304	1.85455	1.41587		11	488	108	90	0.331885	17.7905	3.6164	2.66821
Pp1s34_343V6	0.234726	2.30976	-1.31537	-0.491021		39	136	12	24	1.17668	4.95802	0.401822	0.711521	PF09465,PF02178					AT3G58090.1		Disease resistance-responsive (dirigent-like protein) family protein					GO:0003674 molecular_function;GO:0005575 cellular_component;GO:0008150 biological_process
Pp1s352_13V6	-3.32193	2.738	-3.32193	-4.07598		0	183	0	2	0	6.67145	0	0.0592934
Pp1s36_353V6	0.59318	3.33604	0.269592	0.13347		50	277	36	37	1.50857	10.0983	1.20547	1.09693		PTHR12461:SF3				AT3G20810.2		2-oxoglutarate (2OG) and Fe(II)-dependent oxygenase superfamily protein					GO:0003700 sequence-specific DNA binding transcription factor activity;GO:0005575 cellular_component;GO:0007623 circadian rhythm;GO:0042752 regulation of circadian rhythm
Pp1s37_251V6	-0.963213	5.69398	-0.256477	1.86653		17	1420	25	123	0.512913	51.7676	0.83713	3.64655
Pp1s37_353V6	0.234726	3.38721	-3.31537	1.31633		39	287	3	84	1.17668	10.4629	0.100456	2.49032	PF00319	PTHR11945	KOG0014			AT1G65330.1	PHE1	MADS-box transcription factor family protein					GO:0003677 DNA binding;GO:0003700 sequence-specific DNA binding transcription factor activity;GO:0003700 sequence-specific DNA binding transcription factor activity;GO:0005634 nucleus;GO:0005634 nucleus;GO:0009793 embryo development ending in seed dormancy;GO:0003700 sequence-specific DNA binding transcription factor activity;GO:0090406 pollen tube
Pp1s370_59V6	0.971692	3.81476	0.0538632	0.13347		65	386	31	37	1.96114	14.072	1.03804	1.09693	PF00378	PTHR11941	KOG1684	3.1.2.4	K05605	AT5G65940.1	CHY1	beta-hydroxyisobutyryl-CoA hydrolase 1				Valine, leucine and isoleucine degradation;beta-Alanine metabolism;Propanoate metabolism;Metabolic pathways	GO:0003860 3-hydroxyisobutyryl-CoA hydrolase activity;GO:0006574 valine catabolic process;GO:0006635 fatty acid beta-oxidation;GO:0009733 response to auxin stimulus;GO:0009409 response to cold
Pp1s379_42V6	0.158777	5.36185	-1.90033	2.33341		37	1128	8	170	1.11634	41.1224	0.267882	5.03994	PF02987	PTHR23241				AT4G36600.1		Late embryogenesis abundant (LEA) protein					GO:0003674 molecular_function;GO:0009793 embryo development ending in seed dormancy
Pp1s38_172V6	-0.350237	2.09267	0.0538632	-0.683666		26	117	31	21	0.784455	4.26536	1.03804	0.622581	PF00646					AT1G27340.1		Galactose oxidase/kelch repeat superfamily protein					GO:0003674 molecular_function;GO:0008150 biological_process
Pp1s383_6V6	-1.14379	2.72215	-0.508016	-1.75406		15	181	21	10	0.45257	6.59854	0.703189	0.296467		PTHR23241
Pp1s395_40V6	-3.32193	2.08028	-3.90033	-3.32193		0	116	2	0	0	4.2289	0.0669704	0		PTHR11932:SF6				AT4G02570.1	CUL1	cullin 1					GO:0007049 cell cycle;GO:0000151 ubiquitin ligase complex;GO:0009733 response to auxin stimulus;GO:0009793 embryo development ending in seed dormancy;GO:0005634 nucleus;GO:0005819 spindle;GO:0009524 phragmoplast;GO:0000794 condensed nuclear chromosome;GO:0005737 cytoplasm;GO:0005515 protein binding;GO:0005515 protein binding;GO:0005515 protein binding;GO:0005515 protein binding;GO:0005515 protein…
Pp1s397_21V6	-2.72875	3.55322	-3.90033	0.447578		5	322	2	46	0.150857	11.7388	0.0669704	1.36375	PF00483,PF00132	PTHR22572	KOG1322			AT5G19220.1	APL1	ADP glucose pyrophosphorylase large subunit 1				Starch and sucrose metabolism;Amino sugar and nucleotide sugar metabolism;Metabolic pathways	GO:0008878 glucose-1-phosphate adenylyltransferase activity;GO:0009058 biosynthetic process;GO:0009941 chloroplast envelope;GO:0009570 chloroplast stroma;GO:0009507 chloroplast;GO:0008878 glucose-1-phosphate adenylyltransferase activity;GO:0008878 glucose-1-phosphate adenylyltransferase activity;GO:0009570 chloroplast stroma
Pp1s398_23V6	1.66357	5.25435	2.09967	0.731371		105	1047	128	56	3.16799	38.1695	4.2861	1.66022						AT1G27990.1							GO:0003674 molecular_function;GO:0005575 cellular_component;GO:0008150 biological_process
Pp1s41_113V6	-3.32193	2.06779	-0.578405	-0.375544		0	115	20	26	0	4.19244	0.669704	0.770815
Pp1s44_262V6	0.472886	2.74586	-3.90033	-0.375544		46	184	2	26	1.38788	6.70791	0.0669704	0.770815						AT1G36095.1		DNA binding					GO:0003677 DNA binding;GO:0005575 cellular_component;GO:0008150 biological_process
Pp1s44_37V6	-3.32193	3.24467	-3.32193	-3.49102		0	260	0	3	0	9.47857	0	0.0889402						AT1G49000.1							GO:0003674 molecular_function;GO:0008150 biological_process;GO:0009507 chloroplast
Pp1s5_267V6	-3.32193	2.21099	-3.90033	-0.683666		0	127	2	21	0	4.62992	0.0669704	0.622581
Pp1s5_351V6	-0.465714	2.45112	-3.32193	-3.07598		24	150	0	4	0.724113	5.46841	0	0.118587		PTHR11780				AT5G08530.1	CI51	51 kDa subunit of complex I				Oxidative phosphorylation;Metabolic pathways	GO:0006120 "mitochondrial electron transport, NADH to ubiquinone";GO:0008137 NADH dehydrogenase (ubiquinone) activity;GO:0008137 NADH dehydrogenase (ubiquinone) activity;GO:0010181 FMN binding;GO:0016651 "oxidoreductase activity, acting on NADH or NADPH";GO:0051287 NAD or NADH binding;GO:0051539 "4 iron, 4 sulfur cluster binding";GO:0055114 oxidation-reduction process;GO:0005739 mitochondrion;GO:…
Pp1s50_176V6	-4.05068	3.15894	0.457219	-0.268629		2	245	41	28	0.0603427	8.93173	1.37289	0.830108	PF03171	PTHR10209	KOG0143			AT4G21200.1	GA2OX8	gibberellin 2-oxidase 8					GO:0005575 cellular_component;GO:0009685 gibberellin metabolic process;GO:0052634 C-19 gibberellin 2-beta-dioxygenase activity;GO:0052635 C-20 gibberellin 2-beta-dioxygenase activity
Pp1s51_46V6	0.756679	3.74194	-1.19989	-1.61655		56	367	13	11	1.6896	13.3794	0.435307	0.326114
Pp1s52_71V6	-1.35024	1.96377	-3.32193	-0.683666		13	107	0	21	0.392228	3.9008	0	0.622581	PF07745
Pp1s54_227V6	-0.00628214	2.10494	-3.32193	-0.169093		33	118	0	30	0.995655	4.30181	0	0.889402
Pp1s540_10V6	0.90352	3.06779	0.30912	-0.0315894		62	230	37	33	1.87062	8.38489	1.23895	0.978342	PF01417	PTHR12276	KOG2056			AT3G46540.1		ENTH/VHS family protein					GO:0005488 binding;GO:0005575 cellular_component;GO:0008150 biological_process
Pp1s55_253V6	0.856214	3.04885	-1.90033	-0.268629		60	227	8	28	1.81028	8.27552	0.267882	0.830108	PF00847					AT5G11590.1	TINY2	Integrase-type DNA-binding superfamily protein					GO:0003677 DNA binding;GO:0003700 sequence-specific DNA binding transcription factor activity;GO:0005634 nucleus;GO:0006355 "regulation of transcription, DNA-dependent";GO:0006355 "regulation of transcription, DNA-dependent";GO:0003700 sequence-specific DNA binding transcription factor activity
Pp1s57_24V6	0.649763	5.42443	1.65426	-0.169093		52	1178	94	30	1.56891	42.9452	3.14761	0.889402	PF00403	PTHR22814	KOG1603			AT1G06330.1		Heavy metal transport/detoxification superfamily protein					GO:0005507 copper ion binding;GO:0005575 cellular_component;GO:0006825 copper ion transport;GO:0030001 metal ion transport;GO:0046872 metal ion binding
Pp1s59_305V6	-3.32193	3.01672	-3.32193	-3.49102		0	222	0	3	0	8.09324	0	0.0889402	PF08063,PF00533,PF05406,PF00644	PTHR15447	KOG1037			AT5G22470.1		NAD+ ADP-ribosyltransferases;NAD+ ADP-ribosyltransferases					GO:0003950 NAD+ ADP-ribosyltransferase activity;GO:0003950 NAD+ ADP-ribosyltransferase activity;GO:0005622 intracellular;GO:0005634 nucleus;GO:0005634 nucleus;GO:0006471 protein ADP-ribosylation;GO:0006471 protein ADP-ribosylation
Pp1s6_369V6	-3.32193	2.89473	0.30912	0.350281		0	204	37	43	0	7.43703	1.23895	1.27481	PF00106	PTHR19410	KOG0725			AT1G54870.1		NAD(P)-binding Rossmann-fold superfamily protein					GO:0016491 oxidoreductase activity;GO:0008106 alcohol dehydrogenase (NADP+) activity;GO:0009507 chloroplast;GO:0055114 oxidation-reduction process
Pp1s60_54V6	-2.05068	2.15304	-0.652406	-0.906058		8	122	19	18	0.241371	4.44764	0.636219	0.533641	PF02987	PTHR23241	KOG2886			AT3G62580.1		Late embryogenesis abundant protein (LEA) family protein					GO:0003674 molecular_function;GO:0008150 biological_process;GO:0012505 endomembrane system
Pp1s61_125V6	-3.32193	3.83333	-3.90033	1.01148		0	391	2	68	0	14.2543	0.0669704	2.01598	PF00406	PTHR23359	KOG3079			AT5G26667.1	PYR6	P-loop containing nucleoside triphosphate hydrolases superfamily protein				Pyrimidine metabolism;Metabolic pathways	GO:0009041 uridylate kinase activity;GO:0005829 cytosol;GO:0005829 cytosol;GO:0005829 cytosol;GO:0004127 cytidylate kinase activity;GO:0009041 uridylate kinase activity;GO:0009173 pyrimidine ribonucleoside monophosphate metabolic process
Pp1s64_41V6	0.621749	2.87335	-0.730408	-0.828056		51	201	18	19	1.53874	7.32766	0.602733	0.563288		PTHR10366				AT5G02240.1		NAD(P)-binding Rossmann-fold superfamily protein					GO:0003824 catalytic activity;GO:0003854 3-beta-hydroxy-delta5-steroid dehydrogenase activity;GO:0005488 binding;GO:0005774 vacuolar membrane;GO:0005886 plasma membrane;GO:0048046 apoplast;GO:0009737 response to abscisic acid stimulus;GO:0005829 cytosol
Pp1s67_175V6	2.68403	6.3177	2.91985	3.75691		213	2188	226	456	6.4265	79.7658	7.56765	13.5189	PF07853
Pp1s67_30V6	3.89477	8.94777	6.86826	6.27827		493	13545	3489	2618	14.8745	493.797	116.83	77.6151
Pp1s68_134V6	-0.465714	2.27758	-0.81287	-0.988521		24	133	17	17	0.724113	4.84865	0.569248	0.503994	PF02714	PTHR13018				AT4G02900.1		ERD (early-responsive to dehydration stress) family protein					GO:0008150 biological_process
Pp1s7_359V6	0.704211	2.66525	-3.90033	-1.75406		54	174	2	10	1.62925	6.34335	0.0669704	0.296467						AT3G02555.1							GO:0003674 molecular_function;GO:0008150 biological_process
Pp1s70_278V6	-0.295789	2.70612	-1.09298	-0.683666		27	179	14	21	0.814627	6.52563	0.468793	0.622581	PF06203					AT5G41380.1		CCT motif family protein					GO:0003674 molecular_function;GO:0008150 biological_process
Pp1s76_45V6	-0.0964799	2.54423	-3.32193	-0.432127		31	160	0	25	0.935312	5.83297	0	0.741168	PF01988		KOG4473			AT2G01770.1	VIT1	vacuolar iron transporter 1					GO:0005381 iron ion transmembrane transporter activity;GO:0005774 vacuolar membrane;GO:0006880 intracellular sequestering of iron ion;GO:0006880 intracellular sequestering of iron ion;GO:0055072 iron ion homeostasis
Pp1s8_127V6	-0.00628214	2.41213	-0.199893	-0.828056		33	146	26	19	0.995655	5.32258	0.870615	0.563288	PF00847					AT4G32800.1		Integrase-type DNA-binding superfamily protein					GO:0003677 DNA binding;GO:0003700 sequence-specific DNA binding transcription factor activity;GO:0005634 nucleus;GO:0006355 "regulation of transcription, DNA-dependent";GO:0006355 "regulation of transcription, DNA-dependent";GO:0003700 sequence-specific DNA binding transcription factor activity
Pp1s8_163V6	-2.72875	3.66525	-3.32193	-0.683666		5	348	0	21	0.150857	12.6867	0	0.622581	PF00282	PTHR11999	KOG1383			AT2G02010.1	GAD4	glutamate decarboxylase 4				Alanine, aspartate and glutamate metabolism;beta-Alanine metabolism;Taurine and hypotaurine metabolism;Butanoate metabolism;Metabolic pathways;Biosynthesis of secondary metabolites	GO:0006536 glutamate metabolic process;GO:0019752 carboxylic acid metabolic process;GO:0005516 calmodulin binding;GO:0005634 nucleus;GO:0005829 cytosol
Pp1s8_46V6	2.05785	4.91579	1.5754	0.731371		138	828	89	56	4.16365	30.1856	2.98018	1.66022	PF02574	PTHR21091	KOG1579	2.1.1.10	K00547	AT3G63250.1	HMT2	homocysteine methyltransferase 2				Cysteine and methionine metabolism;Metabolic pathways;Biosynthesis of secondary metabolites	GO:0008898 homocysteine S-methyltransferase activity;GO:0012505 endomembrane system;GO:0008898 homocysteine S-methyltransferase activity;GO:0009086 methionine biosynthetic process;GO:0033528 S-methylmethionine cycle
Pp1s84_154V6	-0.350237	1.99049	-3.31537	-1.90606		26	109	3	9	0.784455	3.97371	0.100456	0.266821						AT3G12650.1							GO:0003674 molecular_function;GO:0008150 biological_process;GO:0005739 mitochondrion
Pp1s86_63V6	0.534286	2.91579	-0.900333	0.756907		48	207	16	57	1.44823	7.5464	0.535763	1.68986	PF00079	PTHR11461	KOG2392			AT1G47710.1		Serine protease inhibitor (SERPIN) family protein					GO:0004867 serine-type endopeptidase inhibitor activity;GO:0004867 serine-type endopeptidase inhibitor activity;GO:0008150 biological_process;GO:0010951 negative regulation of endopeptidase activity;GO:0030162 regulation of proteolysis;GO:0004869 cysteine-type endopeptidase inhibitor activity;GO:0048046 apoplast
Pp1s88_174V6	-3.05068	2.06779	-3.32193	-3.32193		4	115	0	0	0.120685	4.19244	0	0	PF00319	PTHR11945	KOG0014			AT5G60440.1	AGL62	AGAMOUS-like 62					GO:0003677 DNA binding;GO:0005634 nucleus;GO:0003700 sequence-specific DNA binding transcription factor activity;GO:0003700 sequence-specific DNA binding transcription factor activity;GO:0003700 sequence-specific DNA binding transcription factor activity;GO:0009960 endosperm development
Pp1s90_77V6	-1.14379	1.96377	-0.145446	-0.683666		15	107	27	21	0.45257	3.9008	0.9041	0.622581	PF02485	PTHR19297	KOG0799			AT1G03520.1		Core-2/I-branching beta-1,6-N-acetylglucosaminyltransferase family protein					GO:0008375 acetylglucosaminyltransferase activity;GO:0016020 membrane;GO:0016020 membrane;GO:0016020 membrane;GO:0016051 carbohydrate biosynthetic process;GO:0016757 "transferase activity, transferring glycosyl groups"
Pp1s93_151V6	-1.05068	2.42197	-0.199893	-1.61655		16	147	26	11	0.482742	5.35904	0.870615	0.326114
Pp1s96_51V6	-2.46571	2.2223	-3.90033	-0.491021		6	128	2	24	0.181028	4.66637	0.0669704	0.711521						AT2G37300.2							GO:0003674 molecular_function;GO:0008150 biological_process;GO:0012505 endomembrane system
Pp1s97_9V6	-0.143786	2.10494	-1.19989	-1.61655		30	118	13	11	0.905141	4.30181	0.435307	0.326114
Pp1s102_20V6	-3.32193	3.38721	-1.4409	-1.49102		0	287	11	12	0	10.4629	0.368337	0.355761	PF01212	PTHR10289	KOG1368	4.1.2.5	K01620	AT3G04520.1	THA2	threonine aldolase 2				Glycine, serine and threonine metabolism;Metabolic pathways;Biosynthesis of secondary metabolites	GO:0004793 threonine aldolase activity;GO:0005575 cellular_component;GO:0004793 threonine aldolase activity;GO:0006567 threonine catabolic process
Pp1s11_295V6	-3.46571	2.74586	0.269592	-0.0759835		3	184	36	32	0.0905141	6.70791	1.20547	0.948695	PF05512					AT1G04560.1		AWPM-19-like family protein					GO:0003674 molecular_function;GO:0008150 biological_process;GO:0012505 endomembrane system
Pp1s111_58V6	-0.143786	2.52608	-0.440902	-0.988521		30	158	22	17	0.905141	5.76005	0.736674	0.503994	PF03407	PTHR10483				AT1G14590.1		Nucleotide-diphospho-sugar transferase family protein					GO:0003674 molecular_function;GO:0008150 biological_process;GO:0009543 chloroplast thylakoid lumen
Pp1s114_175V6	-0.00628214	2.24467	0.30912	0.0532995		33	130	37	35	0.995655	4.73928	1.23895	1.03764		PTHR11005				AT1G15060.1		Uncharacterised conserved protein UCP031088, alpha/beta hydrolase					GO:0009507 chloroplast
Pp1s145_161V6	-1.35024	2.05519	-0.256477	-1.75406		13	114	25	10	0.392228	4.15599	0.83713	0.296467	PF02798,PF00043	PTHR11260	KOG0406			AT3G55040.1	GSTL2	glutathione transferase lambda 2					GO:0010731 protein glutathionylation;GO:0009570 chloroplast stroma;GO:0009507 chloroplast;GO:0009570 chloroplast stroma
Pp1s224_131V6	-1.35024	2.05519	-1.19989	-2.75406		13	114	13	5	0.392228	4.15599	0.435307	0.148234
Pp1s313_9V6	-0.802749	2.83701	0.800107	-0.828056		19	196	52	19	0.573256	7.14538	1.74123	0.563288						AT5G55980.1		serine-rich protein-related					GO:0003674 molecular_function;GO:0008150 biological_process
Pp1s35_262V6	0.807305	4.81102	1.74352	-0.321096		58	770	100	27	1.74994	28.0711	3.34852	0.800462	PF01135	PTHR11579	KOG1661			AT5G50240.1	PIMT2	protein-l-isoaspartate methyltransferase 2					GO:0004719 protein-L-isoaspartate (D-aspartate) O-methyltransferase activity;GO:0006464 protein modification process;GO:0006464 protein modification process;GO:0006464 protein modification process;GO:0006464 protein modification process;GO:0005634 nucleus;GO:0004719 protein-L-isoaspartate (D-aspartate) O-methyltransferase activity
Pp1s398_25V6	0.158777	2.68173	0.385069	-1.16909		37	176	39	15	1.11634	6.41626	1.30592	0.444701	PF04433	PTHR12802				AT2G47620.1	SWI3A	SWITCH/sucrose nonfermenting 3A					GO:0003677 DNA binding;GO:0003677 DNA binding;GO:0006338 chromatin remodeling;GO:0016514 SWI/SNF complex
Pp1s414_10V6	-1.35024	2.70612	0.347594	-2.49102		13	179	38	6	0.392228	6.52563	1.27244	0.17788	PF00349,PF03727	PTHR19443	KOG1369	2.7.1.1	K00844	AT4G29130.1	HXK1	hexokinase 1				Glycolysis / Gluconeogenesis;Fructose and mannose metabolism;Galactose metabolism;Starch and sucrose metabolism;Amino sugar and nucleotide sugar metabolism;Metabolic pathways;Biosynthesis of secondary metabolites	GO:0004396 hexokinase activity;GO:0005524 ATP binding;GO:0004340 glucokinase activity;GO:0004396 hexokinase activity;GO:0008865 fructokinase activity;GO:0019320 hexose catabolic process;GO:0004340 glucokinase activity;GO:0010182 sugar mediated signaling pathway;GO:0010255 glucose mediated signaling pathway;GO:0005739 mitochondrion;GO:0005773 vacuole;GO:0005739 mitochondrion;GO:0009536 plastid;GO:…
Pp1s58_193V6	-0.802749	1.95022	-0.440902	-3.32193		19	106	22	0	0.573256	3.86434	0.736674	0	PF01738	PTHR17630	KOG3043			AT3G23600.1		alpha/beta-Hydrolases superfamily protein					GO:0016787 hydrolase activity;GO:0016787 hydrolase activity;GO:0016787 hydrolase activity;GO:0005634 nucleus;GO:0005737 cytoplasm;GO:0005886 plasma membrane;GO:0005886 plasma membrane;GO:0009651 response to salt stress;GO:0009651 response to salt stress;GO:0048046 apoplast;GO:0048046 apoplast;GO:0005829 cytosol;GO:0005829 cytosol
Pp1s6_180V6	0.158777	2.35158	-1.19989	-2.49102		37	140	13	6	1.11634	5.10385	0.435307	0.17788	PF00171	PTHR11699	KOG2451	1.2.1.16	K00135	AT1G79440.1	ALDH5F1	aldehyde dehydrogenase 5F1				Alanine, aspartate and glutamate metabolism;Tyrosine metabolism;Butanoate metabolism;Metabolic pathways	GO:0004028 3-chloroallyl aldehyde dehydrogenase activity;GO:0004777 succinate-semialdehyde dehydrogenase activity;GO:0004777 succinate-semialdehyde dehydrogenase activity;GO:0005759 mitochondrial matrix;GO:0006540 glutamate decarboxylation to succinate;GO:0009450 gamma-aminobutyric acid catabolic process;GO:0051287 NAD or NADH binding;GO:0005739 mitochondrion;GO:0006950 response to stress;GO:0009…
Pp1s7_391V6	-3.32193	5.02643	2.707	0.245945		0	894	195	40	0	32.5917	6.52961	1.18587	PF00301					AT5G51010.1		Rubredoxin-like superfamily protein					GO:0009055 electron carrier activity;GO:0046872 metal ion binding;GO:0046872 metal ion binding
Pp1s81_159V6	-0.243321	2.14116	-3.32193	-3.49102		28	121	0	3	0.844798	4.41118	0	0.0889402	PF08446,PF01590,PF00360,PF00989,PF08448,PF00512,PF02518	PTHR23283				AT2G18790.1	PHYB	phytochrome B				Circadian rhythm - plant	GO:0004673 protein histidine kinase activity;GO:0004871 signal transducer activity;GO:0006355 "regulation of transcription, DNA-dependent";GO:0008020 G-protein coupled photoreceptor activity;GO:0005634 nucleus;GO:0005515 protein binding;GO:0005515 protein binding;GO:0005515 protein binding;GO:0005515 protein binding;GO:0005515 protein binding;GO:0005515 protein binding;GO:0009409 response to cold…
Pp1s97_25V6	0.441177	2.61462	0.0065575	-1.90606		45	168	30	9	1.35771	6.12461	1.00456	0.266821	PF00533	PTHR23196:SF1				AT3G21480.1		BRCT domain-containing DNA repair protein					GO:0003674 molecular_function;GO:0005622 intracellular;GO:0008150 biological_process
Pp1s98_26V6	-1.72875	2.24467	-0.993443	-3.32193		10	130	15	0	0.301714	4.73928	0.502278	0		PTHR19959:SF16				AT5G02130.1	NDP1	Tetratricopeptide repeat (TPR)-like superfamily protein					GO:0005488 binding;GO:0005575 cellular_component;GO:0008150 biological_process
Pp1s111_159V6	-0.295789	2.28839	-3.32193	-4.07598		27	134	0	2	0.814627	4.88511	0	0.0592934	PF04658	PTHR12228			K03132	AT1G55300.1	TAF7	TBP-associated factor 7				Basal transcription factors	GO:0006367 transcription initiation from RNA polymerase II promoter;GO:0006367 transcription initiation from RNA polymerase II promoter
Pp1s112_139V6	-0.658359	1.92274	-0.315371	-3.32193		21	104	24	0	0.633599	3.79143	0.803645	0	PF00125,PF00808	PTHR10252	KOG1659			AT3G12480.1	NF-YC11	nuclear factor Y, subunit C11					GO:0003677 DNA binding;GO:0005634 nucleus;GO:0006355 "regulation of transcription, DNA-dependent";GO:0003700 sequence-specific DNA binding transcription factor activity;GO:0005829 cytosol
Pp1s113_38V6	0.197251	2.32033	-3.32193	-4.07598		38	137	0	2	1.14651	4.99448	0	0.0592934	PF00719	PTHR10286	KOG1626	3.6.1.1	K01507	AT5G09650.1	PPa6	pyrophosphorylase 6				Oxidative phosphorylation	GO:0008152 metabolic process;GO:0016020 membrane;GO:0016462 pyrophosphatase activity;GO:0009941 chloroplast envelope;GO:0004427 inorganic diphosphatase activity;GO:0004427 inorganic diphosphatase activity;GO:0009570 chloroplast stroma;GO:0044434 chloroplast part;GO:0009570 chloroplast stroma;GO:0004427 inorganic diphosphatase activity;GO:0046686 response to cadmium ion;GO:0009579 thylakoid;GO:004…
Pp1s120_74V6	-0.243321	2.19958	-0.0423521	-4.07598		28	126	29	2	0.844798	4.59346	0.97107	0.0592934	PF07231,PF07014					AT2G40000.1	HSPRO2	ortholog of sugar beet HS1 PRO-1 2					GO:0003674 molecular_function;GO:0009751 response to salicylic acid stimulus;GO:0009816 "defense response to bacterium, incompatible interaction";GO:0006979 response to oxidative stress
Pp1s134_56V6	-2.24332	2.80726	-1.09298	-4.07598		7	192	14	2	0.2112	6.99956	0.468793	0.0592934	PF00581		KOG1530
Pp1s149_49V6	-3.05068	4.39972	1.40345	-1.49102		4	579	79	12	0.120685	21.108	2.64533	0.355761
Pp1s157_51V6	2.05785	4.45832	2.34759	-0.169093		138	603	152	30	4.16365	21.983	5.08975	0.889402						AT4G11910.1							GO:0008150 biological_process;GO:0009507 chloroplast
Pp1s163_69V6	-0.143786	1.93655	-1.57841	-3.32193		30	105	10	0	0.905141	3.82788	0.334852	0
Pp1s171_111V6	0.271252	2.57103	-3.32193	-4.07598		40	163	0	2	1.20685	5.94233	0	0.0592934	PF00582					AT1G11360.1		Adenine nucleotide alpha hydrolases-like superfamily protein					GO:0006950 response to stress;GO:0006950 response to stress;GO:0006950 response to stress;GO:0006950 response to stress;GO:0006950 response to stress;GO:0005886 plasma membrane;GO:0005886 plasma membrane;GO:0005829 cytosol
Pp1s171_5V6	3.29362	6.55602	2.81391	-0.375544		325	2581	210	26	9.80569	94.093	7.03189	0.770815		PTHR10190				AT2G35320.1	EYA	EYES ABSENT homolog					GO:0005575 cellular_component;GO:0006470 protein dephosphorylation;GO:0030946 "protein tyrosine phosphatase activity, metal-dependent"
Pp1s22_38V6	0.59318	3.84069	1.62323	-1.26863		50	393	92	14	1.50857	14.3272	3.08064	0.415054
Pp1s284_21V6	1.78221	3.71415	-0.0929782	-1.37554		114	360	28	13	3.43954	13.1242	0.937585	0.385407	PF00168,PF02893	PTHR16122	KOG1032			AT1G03370.1		C2 calcium/lipid-binding and GRAM domain containing protein					GO:0008150 biological_process
Pp1s289_62V6	0.926604	2.92966	-3.31537	-1.90606		63	209	3	9	1.9008	7.61931	0.100456	0.266821	PF00561	PTHR10992	KOG1454			AT4G37470.1		alpha/beta-Hydrolases superfamily protein					GO:0005575 cellular_component;GO:0016787 hydrolase activity;GO:0080167 response to karrikin;GO:0009640 photomorphogenesis;GO:0009704 de-etiolation
Pp1s29_302V6	-0.0506763	2.19958	-3.90033	-3.32193		32	126	2	0	0.965484	4.59346	0.0669704	0
Pp1s335_2V6	1.11925	3.04885	-0.508016	-1.16909		72	227	21	15	2.17234	8.27552	0.703189	0.444701		PTHR21328
Pp1s350_17V6	0.341641	2.70612	-3.31537	-2.75406		42	179	3	5	1.2672	6.52563	0.100456	0.148234
Pp1s370_63V6	-0.40682	3.69803	1.45722	-2.26863		25	356	82	7	0.754284	12.9783	2.74579	0.207527	PF00125,PF00808	PTHR10252				AT1G56170.1	NF-YC2	nuclear factor Y, subunit C2					GO:0003677 DNA binding;GO:0005634 nucleus;GO:0006355 "regulation of transcription, DNA-dependent";GO:0003700 sequence-specific DNA binding transcription factor activity;GO:0005634 nucleus;GO:0005737 cytoplasm;GO:0005515 protein binding;GO:0045893 "positive regulation of transcription, DNA-dependent";GO:0003700 sequence-specific DNA binding transcription factor activity;GO:0006355 "regulation of t…
Pp1s38_352V6	0.0367866	2.48909	-3.90033	-3.32193		34	154	2	0	1.02583	5.61423	0.0669704	0	PF03081	PTHR12542	KOG2344		K07195	AT4G31540.1	EXO70G1	exocyst subunit exo70 family protein G1					GO:0000145 exocyst;GO:0006887 exocytosis;GO:0006904 vesicle docking involved in exocytosis;GO:0005829 cytosol
Pp1s53_226V6	0.408755	2.62318	-2.31537	-3.07598		44	169	6	4	1.32754	6.16107	0.200911	0.118587	PF10294	PTHR23109	KOG2793			AT5G27400.1		S-adenosyl-L-methionine-dependent methyltransferases superfamily protein					GO:0003674 molecular_function;GO:0008150 biological_process;GO:0005829 cytosol
Pp1s57_22V6	0.949324	2.92966	-3.31537	-1.75406		64	209	3	10	1.93097	7.61931	0.100456	0.296467	PF00403	PTHR22814	KOG1603			AT3G56891.1		Heavy metal transport/detoxification superfamily protein					GO:0005575 cellular_component;GO:0030001 metal ion transport;GO:0046872 metal ion binding
Pp1s69_160V6	-0.802749	3.01672	0.854554	-2.75406		19	222	54	5	0.573256	8.09324	1.8082	0.148234	PF00561	PTHR10992	KOG1454			AT1G64670.1	BDG1	alpha/beta-Hydrolases superfamily protein					GO:0016787 hydrolase activity;GO:0048196 middle lamella-containing extracellular matrix
Pp1s72_122V6	-3.32193	2.85166	0.684629	-4.07598		0	198	48	2	0	7.2183	1.60729	0.0592934

## Sheet: cluster-3
#Gene	0h (TPM)	24h (TPM)	48h (TPM)	72h (TPM)		0h	24h	48h	72h	0h (TPM)	24h (TPM)	48h (TPM)	72h (TPM)	PFAM	Panther	KOG	KEGG ec	KEGG Orthology	best arabidopsis TAIR10 hit name	best arabidopsis TAIR10 hit symbol	best arabidopsis TAIR10 hit defline	best rice hit name	best rice hit symbol	best rice hit defline	Pathway	Go_terms
Pp1s1_780V6	3.03147	3.26122	5.75966	3.58579		271	263	1618	405	8.17644	9.58794	54.179	12.0069	PF01157	PTHR20981	KOG1732		K02889	AT1G57660.1		Translation protein SH3-like family protein				Ribosome	GO:0003735 structural constituent of ribosome;GO:0003735 structural constituent of ribosome;GO:0005622 intracellular;GO:0005840 ribosome;GO:0005840 ribosome;GO:0006412 translation;GO:0006412 translation
Pp1s100_107V6	1.21611	1.28839	5.03188	2.92964		77	67	977	257	2.3232	2.44255	32.715	7.61921		PTHR10617		1.3.1.83	K10960	AT1G74470.1		Pyridine nucleotide-disulphide oxidoreductase family protein				Porphyrin and chlorophyll metabolism;Terpenoid backbone biosynthesis;Metabolic pathways;Biosynthesis of secondary metabolites	GO:0009941 chloroplast envelope;GO:0009507 chloroplast;GO:0009535 chloroplast thylakoid membrane;GO:0009535 chloroplast thylakoid membrane;GO:0016020 membrane;GO:0009507 chloroplast;GO:0005515 protein binding;GO:0015995 chlorophyll biosynthetic process;GO:0045550 geranylgeranyl reductase activity
Pp1s112_191V6	-0.465714	1.85166	3.83438	1.71843		24	99	426	111	0.724113	3.60915	14.2647	3.29079						AT5G08040.1	TOM5	mitochondrial import receptor subunit TOM5 homolog					GO:0003674 molecular_function;GO:0008150 biological_process;GO:0005739 mitochondrion;GO:0009536 plastid
Pp1s116_110V6	5.99235	2.36185	8.45653	4.17668		2110	141	10491	610	63.6616	5.1403	351.293	18.0845	PF06596					AT2G06520.1	PSBX	photosystem II subunit X					GO:0003674 molecular_function;GO:0015979 photosynthesis;GO:0009535 chloroplast thylakoid membrane
Pp1s146_112V6	3.08375	0.866158	5.06977	2.6175		281	50	1003	207	8.47815	1.8228	33.5856	6.13687		PTHR19410	KOG1208	1.3.1.33	K00218	AT5G54190.1	PORA	protochlorophyllide oxidoreductase A				Porphyrin and chlorophyll metabolism;Metabolic pathways;Biosynthesis of secondary metabolites	GO:0016491 oxidoreductase activity;GO:0016630 protochlorophyllide reductase activity;GO:0009723 response to ethylene stimulus;GO:0015995 chlorophyll biosynthetic process;GO:0016630 protochlorophyllide reductase activity;GO:0009507 chloroplast
Pp1s16_247V6	1.7695	0.129192	4.25954	1.782		113	30	572	116	3.40936	1.09368	19.1535	3.43902	PF00828	PTHR12934	KOG0846		K02876	AT3G25920.1	RPL15	ribosomal protein L15				Ribosome	GO:0009507 chloroplast;GO:0000311 plastid large ribosomal subunit;GO:0003735 structural constituent of ribosome;GO:0006412 translation;GO:0009570 chloroplast stroma;GO:0009507 chloroplast;GO:0009570 chloroplast stroma
Pp1s170_89V6	2.05785	1.80726	4.67898	2.0533		138	96	765	140	4.16365	3.49978	25.6162	4.15054	PF00224,PF02887	PTHR11817	KOG2323	2.7.1.40	K00873	AT3G52990.1		Pyruvate kinase family protein				Glycolysis / Gluconeogenesis;Purine metabolism;Pyruvate metabolism;Carbon fixation in photosynthetic organisms;Metabolic pathways;Biosynthesis of secondary metabolites	GO:0000287 magnesium ion binding;GO:0000287 magnesium ion binding;GO:0003824 catalytic activity;GO:0003824 catalytic activity;GO:0004743 pyruvate kinase activity;GO:0004743 pyruvate kinase activity;GO:0004743 pyruvate kinase activity;GO:0006096 glycolysis;GO:0030955 potassium ion binding;GO:0030955 potassium ion binding;GO:0046686 response to cadmium ion;GO:0016020 membrane;GO:0016020 membrane;GO…
Pp1s174_35V6	-1.35024	-1.7777	2.88757	-0.828056		13	8	221	19	0.392228	0.291648	7.40023	0.563288	PF00226	PTHR11821				AT5G59610.1		Chaperone DnaJ-domain superfamily protein					GO:0006457 protein folding;GO:0006457 protein folding;GO:0006457 protein folding;GO:0031072 heat shock protein binding;GO:0031072 heat shock protein binding;GO:0051082 unfolded protein binding;GO:0051082 unfolded protein binding
Pp1s19_13V6	2.93801	2.40221	8.75218	2.66548		254	145	12877	214	7.66353	5.28613	431.189	6.3444	PF00504	PTHR21649			K08912	AT2G05100.1	LHCB2.1	photosystem II light harvesting complex gene 2.1				Photosynthesis - antenna proteins;Metabolic pathways	GO:0015979 photosynthesis;GO:0016168 chlorophyll binding;GO:0030076 light-harvesting complex;GO:0009941 chloroplast envelope;GO:0009535 chloroplast thylakoid membrane;GO:0009507 chloroplast;GO:0009535 chloroplast thylakoid membrane;GO:0009535 chloroplast thylakoid membrane;GO:0010287 plastoglobule;GO:0016020 membrane;GO:0009507 chloroplast;GO:0009579 thylakoid;GO:0009637 response to blue light;GO…
Pp1s2_522V6	-0.802749	-2.45577	2.707	0.209419		19	5	195	39	0.573256	0.18228	6.52961	1.15622	PF00389,PF02826,PF01842	PTHR10996	KOG0068			AT4G34200.1	EDA9	D-3-phosphoglycerate dehydrogenase				Glycine, serine and threonine metabolism;Metabolic pathways	GO:0005739 mitochondrion;GO:0009561 megagametogenesis;GO:0005524 ATP binding;GO:0005739 mitochondrion;GO:0016020 membrane;GO:0009507 chloroplast;GO:0005829 cytosol
Pp1s201_42V6	2.74374	1.33083	6.82461	2.87238		222	69	3385	247	6.69804	2.51547	113.347	7.32274	PF00025,PF08477,PF01926	PTHR11711	KOG0070		K07977	AT5G14670.1	ARFA1B	ADP-ribosylation factor A1B					GO:0005525 GTP binding;GO:0005525 GTP binding;GO:0016004 phospholipase activator activity;GO:0005829 cytosol
Pp1s213_83V6	-0.00628214	-3.32193	2.05386	-1.16909		33	0	124	15	0.995655	0	4.15216	0.444701						AT5G01710.1		methyltransferases					GO:0008152 metabolic process;GO:0008168 methyltransferase activity
Pp1s249_53V6	2.17814	0.714155	4.68275	2.1908		150	45	767	154	4.5257	1.64052	25.6831	4.5656	PF06596					AT2G06520.1	PSBX	photosystem II subunit X					GO:0003674 molecular_function;GO:0015979 photosynthesis;GO:0009535 chloroplast thylakoid membrane
Pp1s252_26V6	0.234726	-0.318267	3.21861	0.41587		39	22	278	45	1.17668	0.802033	9.30888	1.3341						AT1G49410.1	TOM6	translocase of the outer mitochondrial membrane 6					GO:0003674 molecular_function;GO:0008150 biological_process;GO:0005739 mitochondrion
Pp1s252_2V6	4.70254	3.81476	6.72126	4.43379		863	386	3151	729	26.0379	14.072	105.512	21.6125	PF03018	PTHR21495				AT1G22900.1		Disease resistance-responsive (dirigent-like protein) family protein					GO:0003674 molecular_function;GO:0006952 defense response;GO:0012505 endomembrane system
Pp1s30_298V6	1.81969	3.31506	6.15088	3.21864		117	273	2122	314	3.53005	9.9525	71.0556	9.30907	PF00467	PTHR11143	KOG3401			AT3G49910.1		Translation protein SH3-like family protein				Ribosome	GO:0003735 structural constituent of ribosome;GO:0003735 structural constituent of ribosome;GO:0006412 translation;GO:0015934 large ribosomal subunit;GO:0005634 nucleus;GO:0009409 response to cold;GO:0009507 chloroplast;GO:0005730 nucleolus;GO:0022626 cytosolic ribosome;GO:0022626 cytosolic ribosome;GO:0022626 cytosolic ribosome;GO:0005774 vacuolar membrane;GO:0005886 plasma membrane;GO:0016020 m…
Pp1s33_258V6	-3.32193	-3.7777	2.66191	-2.07598		0	2	189	8	0	0.0729121	6.3287	0.237174	PF03330,PF01357					AT5G02260.1	EXPA9	expansin A9					GO:0009826 unidimensional cell growth;GO:0009828 plant-type cell wall loosening;GO:0009831 plant-type cell wall modification involved in multidimensional cell growth;GO:0009826 unidimensional cell growth;GO:0009828 plant-type cell wall loosening;GO:0009507 chloroplast
Pp1s36_58V6	2.3502	1.83701	4.81906	2.12369		169	98	843	147	5.09896	3.57269	28.228	4.35807						AT4G20150.1							GO:0003674 molecular_function;GO:0008150 biological_process;GO:0005739 mitochondrion;GO:0005774 vacuolar membrane;GO:0005747 mitochondrial respiratory chain complex I;GO:0005747 mitochondrial respiratory chain complex I
Pp1s40_15V6	-0.880751	-1.19274	3.97618	0.756907		18	12	470	57	0.543085	0.437472	15.738	1.68986	PF02776,PF00205,PF02775	PTHR18968	KOG4166	2.2.1.6	K01652	AT3G48560.1	CSR1	chlorsulfuron/imidazolinone resistant 1				Valine, leucine and isoleucine biosynthesis;Butanoate metabolism;C5-Branched dibasic acid metabolism;Pantothenate and CoA biosynthesis;Metabolic pathways;Biosynthesis of secondary metabolites	GO:0004737 pyruvate decarboxylase activity;GO:0009082 branched chain family amino acid biosynthetic process;GO:0009507 chloroplast;GO:0003984 acetolactate synthase activity
Pp1s421_3V6	4.78853	1.35158	7.18348	4.35447		916	70	4341	690	27.637	2.55192	145.359	20.4562	PF01716				K02716	AT3G50820.1	PSBO2	photosystem II subunit O-2				Photosynthesis;Metabolic pathways	GO:0009654 oxygen evolving complex;GO:0030095 chloroplast photosystem II;GO:0009543 chloroplast thylakoid lumen;GO:0031977 thylakoid lumen;GO:0009543 chloroplast thylakoid lumen;GO:0009579 thylakoid;GO:0010242 oxygen evolving activity;GO:0019684 "photosynthesis, light reaction";GO:0009535 chloroplast thylakoid membrane;GO:0009579 thylakoid;GO:0009507 chloroplast;GO:0009535 chloroplast thylakoid m…
Pp1s536_10V6	1.34164	-3.19274	3.57945	0.878213		84	3	357	62	2.53439	0.109368	11.9542	1.8381	PF01281,PF03948	PTHR21368	KOG4607			AT3G44890.1	RPL9	ribosomal protein L9				Ribosome	GO:0003735 structural constituent of ribosome;GO:0005840 ribosome;GO:0006412 translation;GO:0042254 ribosome biogenesis;GO:0009507 chloroplast;GO:0000311 plastid large ribosomal subunit;GO:0003735 structural constituent of ribosome;GO:0006412 translation;GO:0009570 chloroplast stroma;GO:0009507 chloroplast
Pp1s54_206V6	-2.72875	-3.32193	2.15495	-0.906058		5	0	133	18	0.150857	0	4.45353	0.533641	PF00885	PTHR21058	KOG3243	2.5.1.78	K00794	AT2G44050.1	COS1	6,7-dimethyl-8-ribityllumazine synthase / DMRL synthase / lumazine synthase / riboflavin synthase				Riboflavin metabolism;Metabolic pathways	GO:0000906 "6,7-dimethyl-8-ribityllumazine synthase activity";GO:0009231 riboflavin biosynthetic process;GO:0000906 "6,7-dimethyl-8-ribityllumazine synthase activity";GO:0009231 riboflavin biosynthetic process;GO:0009507 chloroplast;GO:0009867 jasmonic acid mediated signaling pathway;GO:0009570 chloroplast stroma;GO:0009507 chloroplast
Pp1s56_52V6	-4.05068	1.48909	3.71805	0.0939415		2	77	393	36	0.0603427	2.80711	13.1597	1.06728	PF11976,PF00240,PF01599	PTHR10666	KOG0004		K02977	AT2G47110.2	UBQ6	ubiquitin 6				Ribosome	GO:0003735 structural constituent of ribosome;GO:0003735 structural constituent of ribosome;GO:0005622 intracellular;GO:0022627 cytosolic small ribosomal subunit;GO:0006511 ubiquitin-dependent protein catabolic process;GO:0042787 protein ubiquitination involved in ubiquitin-dependent protein catabolic process
Pp1s63_162V6	-2.05068	-0.022811	5.72902	2.7378		8	27	1584	225	0.241371	0.984313	53.0405	6.67051	PF00572	PTHR11545	KOG3204		K02872	AT5G48760.1		Ribosomal protein L13 family protein				Ribosome	GO:0003735 structural constituent of ribosome;GO:0003735 structural constituent of ribosome;GO:0003735 structural constituent of ribosome;GO:0006412 translation;GO:0006412 translation;GO:0006412 translation;GO:0015934 large ribosomal subunit;GO:0022626 cytosolic ribosome;GO:0022626 cytosolic ribosome;GO:0022625 cytosolic large ribosomal subunit
Pp1s63_96V6	1.71751	-0.870808	4.0363	1.01148		109	15	490	68	3.28868	0.546841	16.4077	2.01598	PF04172					AT1G32080.1		membrane protein, putative					GO:0009706 chloroplast inner membrane;GO:0009941 chloroplast envelope;GO:0009941 chloroplast envelope;GO:0009507 chloroplast;GO:0016020 membrane;GO:0009507 chloroplast
Pp1s66_28V6	-1.88075	-1.07726	1.78617	-0.552422		9	13	103	23	0.271542	0.473928	3.44897	0.681875	PF00179	PTHR11621	KOG0417	6.3.2.19	K10580	AT1G16890.2	UBC36	ubiquitin-conjugating enzyme 36				Ubiquitin mediated proteolysis	GO:0004842 ubiquitin-protein ligase activity;GO:0004842 ubiquitin-protein ligase activity;GO:0006511 ubiquitin-dependent protein catabolic process;GO:0005886 plasma membrane;GO:0005886 plasma membrane;GO:0005515 protein binding;GO:0005515 protein binding;GO:0005515 protein binding;GO:0005515 protein binding;GO:0031372 UBC13-MMS2 complex;GO:0010039 response to iron ion;GO:0010053 root epidermal ce…
Pp1s70_177V6	0.993718	1.92274	4.37579	1.99011		66	104	620	134	1.99131	3.79143	20.7608	3.97266	PF00892,PF03151	PTHR11132	KOG1441			AT1G61800.1	GPT2	glucose-6-phosphate/phosphate translocator 2					GO:0015152 glucose-6-phosphate transmembrane transporter activity;GO:0015297 antiporter activity;GO:0015712 hexose phosphate transport;GO:0005315 inorganic phosphate transmembrane transporter activity;GO:0007276 gamete generation;GO:0015120 phosphoglycerate transmembrane transporter activity;GO:0015152 glucose-6-phosphate transmembrane transporter activity;GO:0015713 phosphoglycerate transport;GO…
Pp1s72_301V6	1.13915	-0.870808	4.21601	2.27274		73	15	555	163	2.20251	0.546841	18.5843	4.83242		PTHR19383				AT5G42650.1	AOS	allene oxide synthase				alpha-Linolenic acid metabolism;Metabolic pathways	GO:0009611 response to wounding;GO:0009753 response to jasmonic acid stimulus;GO:0009695 jasmonic acid biosynthetic process;GO:0009941 chloroplast envelope;GO:0009941 chloroplast envelope;GO:0005739 mitochondrion;GO:0009507 chloroplast;GO:0009535 chloroplast thylakoid membrane;GO:0009535 chloroplast thylakoid membrane;GO:0006952 defense response;GO:0010287 plastoglobule;GO:0010287 plastoglobule;G…
Pp1s76_196V6	1.32436	-0.870808	4.27709	1.09394		83	15	579	72	2.50422	0.546841	19.3879	2.13456	PF00504	PTHR21649			K08912	AT2G05100.1	LHCB2.1	photosystem II light harvesting complex gene 2.1				Photosynthesis - antenna proteins;Metabolic pathways	GO:0015979 photosynthesis;GO:0016168 chlorophyll binding;GO:0030076 light-harvesting complex;GO:0009941 chloroplast envelope;GO:0009535 chloroplast thylakoid membrane;GO:0009507 chloroplast;GO:0009535 chloroplast thylakoid membrane;GO:0009535 chloroplast thylakoid membrane;GO:0010287 plastoglobule;GO:0016020 membrane;GO:0009507 chloroplast;GO:0009579 thylakoid;GO:0009637 response to blue light;GO…
Pp1s76_199V6	0.503913	-1.60777	3.11089	-0.552422		47	9	258	23	1.41805	0.328104	8.63918	0.681875	PF00466					AT5G13510.1		Ribosomal protein L10 family protein					GO:0003735 structural constituent of ribosome;GO:0005840 ribosome;GO:0006412 translation;GO:0042254 ribosome biogenesis;GO:0022626 cytosolic ribosome;GO:0022626 cytosolic ribosome;GO:0009570 chloroplast stroma;GO:0009507 chloroplast
Pp1s77_254V6	2.20671	2.41213	5.05967	2.73137		153	146	996	224	4.61622	5.32258	33.3512	6.64087	PF05162
Pp1s80_113V6	-0.658359	-1.19274	6.10599	2.80053		21	12	2057	235	0.633599	0.437472	68.879	6.96698	PF01015	PTHR11830	KOG1628		K02984	AT4G34670.1		Ribosomal protein S3Ae				Ribosome	GO:0003735 structural constituent of ribosome;GO:0006412 translation;GO:0022627 cytosolic small ribosomal subunit;GO:0005730 nucleolus;GO:0022626 cytosolic ribosome;GO:0022626 cytosolic ribosome;GO:0022626 cytosolic ribosome;GO:0005618 cell wall;GO:0005886 plasma membrane;GO:0016020 membrane;GO:0022627 cytosolic small ribosomal subunit;GO:0005829 cytosol
Pp1s91_60V6	2.55665	0.431755	4.59352	1.6922		195	37	721	109	5.88342	1.34887	24.1428	3.23149	PF00076	PTHR10432	KOG0131			AT3G53460.2	CP29	chloroplast RNA-binding protein 29					GO:0003723 RNA binding;GO:0009579 thylakoid;GO:0009579 thylakoid;GO:0009579 thylakoid;GO:0009579 thylakoid;GO:0008266 poly(U) RNA binding;GO:0009507 chloroplast;GO:0009507 chloroplast;GO:0009570 chloroplast stroma;GO:0003723 RNA binding;GO:0003723 RNA binding;GO:0009507 chloroplast;GO:0009507 chloroplast
Pp1s1_549V6	-2.46571	-0.254137	2.55088	0.447578		6	23	175	46	0.181028	0.838489	5.85991	1.36375	PF01247	PTHR10902	KOG0887		K02917	AT1G74270.1		Ribosomal protein L35Ae family protein				Ribosome	GO:0003735 structural constituent of ribosome;GO:0003735 structural constituent of ribosome;GO:0005840 ribosome;GO:0006412 translation;GO:0006412 translation;GO:0042254 ribosome biogenesis;GO:0022625 cytosolic large ribosomal subunit;GO:0005829 cytosol
Pp1s101_162V6	-2.24332	-0.607773	2.50055	-0.988521		7	18	169	17	0.2112	0.656209	5.659	0.503994	PF04800	PTHR12219		1.6.5.3,1.6.99.3	K03937	AT5G67590.1	FRO1	NADH-ubiquinone oxidoreductase-related				Oxidative phosphorylation;Metabolic pathways	GO:0005739 mitochondrion;GO:0006970 response to osmotic stress;GO:0008137 NADH dehydrogenase (ubiquinone) activity;GO:0009631 cold acclimation;GO:0005739 mitochondrion;GO:0005739 mitochondrion;GO:0005747 mitochondrial respiratory chain complex I;GO:0050897 cobalt ion binding
Pp1s101_184V6	0.306876	-1.31827	2.32849	-0.0759835		41	11	150	32	1.23703	0.401016	5.02278	0.948695	PF01118,PF02774		KOG4354	1.2.1.-,1.2.1.38	K00145	AT2G19940.1		oxidoreductases, acting on the aldehyde or oxo group of donors, NAD or NADP as acceptor;copper ion binding				Lysine biosynthesis;Arginine and proline metabolism;Metabolic pathways;Biosynthesis of secondary metabolites	GO:0006520 cellular amino acid metabolic process;GO:0016620 "oxidoreductase activity, acting on the aldehyde or oxo group of donors, NAD or NADP as acceptor";GO:0005730 nucleolus;GO:0005730 nucleolus;GO:0046686 response to cadmium ion;GO:0046686 response to cadmium ion;GO:0016020 membrane;GO:0016020 membrane;GO:0009507 chloroplast;GO:0009507 chloroplast;GO:0009570 chloroplast stroma;GO:0005515 pr…
Pp1s102_32V6	2.50391	3.14711	7.68087	3.41186		188	243	6128	359	5.67222	8.85882	205.197	10.6432
Pp1s11_247V6	0.993718	-1.60777	3.20819	0.624456		66	9	276	52	1.99131	0.328104	9.24191	1.54163
Pp1s112_236V6	-0.880751	-0.607773	2.28949	-0.218003		18	18	146	29	0.543085	0.656209	4.88884	0.859755	PF06273					AT3G26400.1	EIF4B1	eukaryotic translation initiation factor 4B1					GO:0003743 translation initiation factor activity;GO:0008150 biological_process;GO:0003743 translation initiation factor activity
Pp1s115_90V6	0.234726	1.19958	3.47905	1.52393		39	63	333	97	1.17668	2.29673	11.1506	2.87573	PF08534,PF00255	PTHR11592	KOG1651	1.11.1.9	K00432	AT4G31870.1	GPX7	glutathione peroxidase 7				Glutathione metabolism;Arachidonic acid metabolism	GO:0004602 glutathione peroxidase activity;GO:0004602 glutathione peroxidase activity;GO:0009507 chloroplast;GO:0080167 response to karrikin
Pp1s119_38V6	1.01541	-3.32193	3.66572	-0.683666		67	0	379	21	2.02148	0	12.6909	0.622581	PF07250,PF09118					AT3G53950.1		glyoxal oxidase-related protein					GO:0003674 molecular_function;GO:0008150 biological_process
Pp1s12_209V6	1.98275	1.5077	5.60548	1.85475		131	78	1454	122	3.95245	2.84357	48.6875	3.6169	PF01070	PTHR10578	KOG0538	1.1.3.15	K11517	AT4G18360.1		Aldolase-type TIM barrel family protein				Glyoxylate and dicarboxylate metabolism;Metabolic pathways;Peroxisome	GO:0003824 catalytic activity;GO:0003824 catalytic activity;GO:0008152 metabolic process;GO:0008152 metabolic process;GO:0008891 glycolate oxidase activity;GO:0010181 FMN binding;GO:0010181 FMN binding;GO:0016491 oxidoreductase activity;GO:0016491 oxidoreductase activity;GO:0055114 oxidation-reduction process;GO:0055114 oxidation-reduction process;GO:0005777 peroxisome;GO:0005777 peroxisome;GO:00…
Pp1s124_132V6	0.621749	-1.19274	2.66191	0.209419		51	12	189	39	1.53874	0.437472	6.3287	1.15622	PF01694	PTHR22936				AT5G25752.1	RBL11	rhomboid-like protein 11					GO:0004252 serine-type endopeptidase activity;GO:0008150 biological_process;GO:0009507 chloroplast
Pp1s13_462V6	-0.963213	-2.45577	1.93256	-1.26863		17	5	114	14	0.512913	0.18228	3.81731	0.415054	PF00226	PTHR11821				AT5G21430.1		Chaperone DnaJ-domain superfamily protein					GO:0031072 heat shock protein binding;GO:0031072 heat shock protein binding;GO:0009535 chloroplast thylakoid membrane;GO:0009535 chloroplast thylakoid membrane;GO:0009507 chloroplast;GO:0009507 chloroplast
Pp1s130_217V6	0.880061	-0.254137	3.81391	0.567873		61	23	420	50	1.84045	0.838489	14.0638	1.48234	PF00227	PTHR11599	KOG0180	3.4.25.1	K02735	AT1G21720.1	PBC1	proteasome beta subunit C1				Proteasome	GO:0004175 endopeptidase activity;GO:0004298 threonine-type endopeptidase activity;GO:0008233 peptidase activity;GO:0006511 ubiquitin-dependent protein catabolic process;GO:0005774 vacuolar membrane;GO:0000502 proteasome complex;GO:0005829 cytosol;GO:0005839 proteasome core complex;GO:0005839 proteasome core complex
Pp1s131_175V6	0.90352	0.614619	3.53846	1.1908		62	42	347	77	1.87062	1.53115	11.6194	2.2828	PF00175	PTHR19384		1.18.1.2	K02641	AT4G05390.1	RFNR1	root FNR 1				Photosynthesis;Metabolic pathways	GO:0009507 chloroplast;GO:0009507 chloroplast;GO:0016491 oxidoreductase activity;GO:0042651 thylakoid membrane;GO:0042651 thylakoid membrane;GO:0055114 oxidation-reduction process;GO:0055114 oxidation-reduction process;GO:0005507 copper ion binding
Pp1s132_175V6	1.44118	-0.529771	5.06401	0.806659		90	19	999	59	2.71542	0.692665	33.4517	1.74916	PF00485	PTHR10285	KOG4203	2.7.1.19	K00855	AT1G32060.1	PRK	phosphoribulokinase				Carbon fixation in photosynthetic organisms;Metabolic pathways	GO:0005524 ATP binding;GO:0008974 phosphoribulokinase activity;GO:0009058 biosynthetic process;GO:0009941 chloroplast envelope;GO:0009507 chloroplast;GO:0009535 chloroplast thylakoid membrane;GO:0009535 chloroplast thylakoid membrane;GO:0005515 protein binding;GO:0009570 chloroplast stroma;GO:0005515 protein binding;GO:0009579 thylakoid;GO:0009409 response to cold;GO:0010319 stromule;GO:0042742 d…
Pp1s14_169V6	-0.527114	1.12919	5.65713	3.00083		23	60	1507	270	0.693941	2.18736	50.4622	8.00462	PF04839					AT1G68590.1		Ribosomal protein PSRP-3/Ycf65					GO:0003735 structural constituent of ribosome;GO:0003735 structural constituent of ribosome;GO:0003735 structural constituent of ribosome;GO:0006412 translation;GO:0006412 translation;GO:0009535 chloroplast thylakoid membrane;GO:0009579 thylakoid;GO:0009507 chloroplast;GO:0009507 chloroplast;GO:0009507 chloroplast
Pp1s141_31V6	-3.05068	-3.32193	1.98231	-0.988521		4	0	118	17	0.120685	0	3.95125	0.503994	PF04398					AT3G08890.1		Protein of unknown function, DUF538					GO:0003674 molecular_function;GO:0005575 cellular_component;GO:0008150 biological_process
Pp1s147_37V6	-2.72875	-3.32193	3.38507	-3.32193		5	0	312	0	0.150857	0	10.4474	0	PF03330,PF01357					AT4G28250.1	EXPB3	expansin B3					GO:0005576 extracellular region;GO:0005576 extracellular region;GO:0009664 plant-type cell wall organization;GO:0009826 unidimensional cell growth;GO:0009828 plant-type cell wall loosening;GO:0012505 endomembrane system;GO:0012505 endomembrane system;GO:0009826 unidimensional cell growth;GO:0009828 plant-type cell wall loosening;GO:0006949 syncytium formation
Pp1s150_85V6	-0.658359	0.0296564	2.707	0.209419		21	28	195	39	0.633599	1.02077	6.52961	1.15622	PF05198,PF00707	PTHR10938			K02520	AT4G30690.1		Translation initiation factor 3 protein					GO:0003743 translation initiation factor activity;GO:0003743 translation initiation factor activity;GO:0003743 translation initiation factor activity;GO:0006413 translational initiation;GO:0006413 translational initiation;GO:0006413 translational initiation;GO:0005618 cell wall;GO:0009507 chloroplast
Pp1s153_72V6	3.01541	0.431755	6.10459	2.86065		268	37	2055	245	8.08593	1.34887	68.8121	7.26345	PF00316	PTHR11556	KOG1458	3.1.3.11	K03841	AT3G54050.1	HCEF1	high cyclic electron flow 1				Glycolysis / Gluconeogenesis;Pentose phosphate pathway;Fructose and mannose metabolism;Carbon fixation in photosynthetic organisms;Metabolic pathways;Biosynthesis of secondary metabolites	GO:0006000 fructose metabolic process;GO:0042132 "fructose 1,6-bisphosphate 1-phosphatase activity";GO:0009507 chloroplast;GO:0005985 sucrose metabolic process;GO:0015979 photosynthesis;GO:0030388 "fructose 1,6-bisphosphate metabolic process";GO:0042132 "fructose 1,6-bisphosphate 1-phosphatase activity";GO:0009570 chloroplast stroma;GO:0009409 response to cold;GO:0010319 stromule;GO:0009507 chlor…
Pp1s154_116V6	1.11925	0.922741	5.91905	2.87238		72	52	1807	247	2.17234	1.89571	60.5077	7.32274	PF00828	PTHR11721	KOG1742		K02900	AT1G70600.1		Ribosomal protein L18e/L15 superfamily protein				Ribosome	GO:0003735 structural constituent of ribosome;GO:0003735 structural constituent of ribosome;GO:0005840 ribosome;GO:0006412 translation;GO:0006412 translation;GO:0022626 cytosolic ribosome;GO:0016020 membrane;GO:0022625 cytosolic large ribosomal subunit;GO:0005829 cytosol
Pp1s155_36V6	2.54924	0.745863	5.61142	1.65194		194	46	1460	106	5.85324	1.67698	48.8884	3.14255	PF00504	PTHR21649			K08915	AT3G08940.2	LHCB4.2	light harvesting complex photosystem II				Photosynthesis - antenna proteins;Metabolic pathways	GO:0016168 chlorophyll binding;GO:0009941 chloroplast envelope;GO:0009941 chloroplast envelope;GO:0009535 chloroplast thylakoid membrane;GO:0009535 chloroplast thylakoid membrane;GO:0009507 chloroplast;GO:0009507 chloroplast;GO:0009535 chloroplast thylakoid membrane;GO:0009535 chloroplast thylakoid membrane;GO:0009535 chloroplast thylakoid membrane;GO:0016020 membrane;GO:0016020 membrane;GO:00095…
Pp1s155_9V6	0.0786068	1.05519	3.30424	0.901296		35	57	295	63	1.056	2.07799	9.87813	1.86774						AT3G51510.1							GO:0003674 molecular_function;GO:0008150 biological_process;GO:0009535 chloroplast thylakoid membrane;GO:0009507 chloroplast;GO:0009535 chloroplast thylakoid membrane;GO:0009535 chloroplast thylakoid membrane
Pp1s157_63V6	-2.72875	1.1765	3.62714	1.29906		5	62	369	83	0.150857	2.26027	12.356	2.46068	PF01055	PTHR22762	KOG1065	3.2.1.20	K01187	AT1G68560.1	XYL1	alpha-xylosidase 1					GO:0004553 "hydrolase activity, hydrolyzing O-glycosyl compounds";GO:0009044 "xylan 1,4-beta-xylosidase activity";GO:0009507 chloroplast;GO:0045493 xylan catabolic process;GO:0046556 alpha-N-arabinofuranosidase activity;GO:0005618 cell wall;GO:0048046 apoplast;GO:0009505 plant-type cell wall;GO:0009505 plant-type cell wall;GO:0046686 response to cadmium ion;GO:0010411 xyloglucan metabolic process…
Pp1s16_367V6	2.08887	1.74586	4.30179	2.29906		141	92	589	166	4.25416	3.35396	19.7228	4.92136
Pp1s167_136V6	-0.00628214	-1.19274	3.14406	-0.268629		33	12	264	28	0.995655	0.437472	8.84009	0.830108						AT4G13500.1							GO:0003674 molecular_function;GO:0008150 biological_process;GO:0009507 chloroplast;GO:0009507 chloroplast
Pp1s168_35V6	-4.05068	-0.970344	2.04218	-0.828056		2	14	123	19	0.0603427	0.510385	4.11868	0.563288	PF02953	PTHR19338	KOG1733			AT1G61570.1	TIM13	translocase of the inner mitochondrial membrane 13					GO:0005743 mitochondrial inner membrane;GO:0006626 protein targeting to mitochondrion;GO:0006626 protein targeting to mitochondrion;GO:0015450 P-P-bond-hydrolysis-driven protein transmembrane transporter activity;GO:0045039 protein import into mitochondrial inner membrane;GO:0005739 mitochondrion;GO:0005739 mitochondrion;GO:0005758 mitochondrial intermembrane space;GO:0005507 copper ion binding
Pp1s185_110V6	4.63407	1.93655	7.67118	5.28815		823	105	6087	1318	24.831	3.82788	203.824	39.0744	PF07123				K02721	AT2G30570.1	PSBW	photosystem II reaction center W				Photosynthesis;Metabolic pathways	GO:0003674 molecular_function;GO:0009535 chloroplast thylakoid membrane;GO:0042549 photosystem II stabilization
Pp1s19_202V6	2.21611	-0.192736	4.60944	1.80666		154	24	729	118	4.64639	0.874945	24.4107	3.49831	PF01016	PTHR15893	KOG4600			AT5G40950.1	RPL27	ribosomal protein large subunit 27					GO:0003735 structural constituent of ribosome;GO:0003735 structural constituent of ribosome;GO:0005840 ribosome;GO:0006412 translation;GO:0006412 translation;GO:0009579 thylakoid;GO:0009507 chloroplast;GO:0009570 chloroplast stroma;GO:0009507 chloroplast
Pp1s191_84V6	0.197251	0.470229	3.52173	0.830907		38	38	343	60	1.14651	1.38533	11.4854	1.7788						AT3G55250.1							GO:0003674 molecular_function;GO:0008150 biological_process;GO:0005634 nucleus;GO:0005739 mitochondrion;GO:0009507 chloroplast
Pp1s196_99V6	0.271252	-1.97034	2.43952	-0.491021		40	7	162	24	1.20685	0.255192	5.4246	0.711521	PF07977			4.2.1.-	K02372	AT5G10160.1		Thioesterase superfamily protein				Fatty acid biosynthesis;Metabolic pathways	GO:0006633 fatty acid biosynthetic process;GO:0006633 fatty acid biosynthetic process;GO:0016836 hydro-lyase activity;GO:0019171 3-hydroxyacyl-[acyl-carrier-protein] dehydratase activity;GO:0005618 cell wall;GO:0016020 membrane;GO:0009507 chloroplast
Pp1s198_49V6	0.306876	0.470229	2.64656	0.624456		41	38	187	52	1.23703	1.38533	6.26173	1.54163	PF04564,PF00514	PTHR22849				AT1G49780.1	PUB26	plant U-box 26					GO:0000151 ubiquitin ligase complex;GO:0004842 ubiquitin-protein ligase activity;GO:0005488 binding;GO:0016567 protein ubiquitination
Pp1s2_788V6	2.07861	1.9088	5.57134	3.15764		140	103	1420	301	4.22399	3.75497	47.549	8.92366	PF02167	PTHR10266	KOG3052	1.10.2.2	K00413	AT5G40810.1		Cytochrome C1 family				Oxidative phosphorylation;Metabolic pathways	GO:0005506 iron ion binding;GO:0005506 iron ion binding;GO:0005746 mitochondrial respiratory chain;GO:0009055 electron carrier activity;GO:0009055 electron carrier activity;GO:0020037 heme binding;GO:0020037 heme binding;GO:0045153 "electron transporter, transferring electrons within CoQH2-cytochrome c reductase complex activity";GO:0005739 mitochondrion;GO:0005773 vacuole;GO:0016020 membrane;GO:…
Pp1s20_372V6	1.97169	-0.529771	4.09119	1.58223		130	19	509	101	3.92228	0.692665	17.044	2.99432
Pp1s206_11V6	1.70421	0.614619	8.4893	4.51273		108	42	10732	770	3.25851	1.53115	359.363	22.828	PF03244				K02695	AT1G52230.1	PSAH2	photosystem I subunit H2				Photosynthesis;Metabolic pathways	GO:0003674 molecular_function;GO:0009538 photosystem I reaction center;GO:0015979 photosynthesis;GO:0015979 photosynthesis;GO:0009535 chloroplast thylakoid membrane;GO:0009507 chloroplast;GO:0009535 chloroplast thylakoid membrane;GO:0009535 chloroplast thylakoid membrane;GO:0010287 plastoglobule;GO:0016020 membrane;GO:0009507 chloroplast;GO:0009579 thylakoid
Pp1s207_91V6	-1.46571	-3.32193	2.05386	-0.268629		12	0	124	28	0.362056	0	4.15216	0.830108						ATCG01130.1	YCF1.2	Ycf1 protein					GO:0016020 membrane;GO:0009507 chloroplast;GO:0005515 protein binding
Pp1s21_214V6	-3.32193	-1.45577	3.05967	-0.375544		0	10	249	26	0	0.36456	8.33781	0.770815	PF00847					AT5G25190.1		Integrase-type DNA-binding superfamily protein					GO:0003677 DNA binding;GO:0003700 sequence-specific DNA binding transcription factor activity;GO:0005634 nucleus;GO:0006355 "regulation of transcription, DNA-dependent";GO:0003700 sequence-specific DNA binding transcription factor activity;GO:0003700 sequence-specific DNA binding transcription factor activity;GO:0009873 ethylene mediated signaling pathway
Pp1s21_269V6	1.05785	-0.318267	5.74802	2.80666		69	22	1605	236	2.08182	0.802033	53.7437	6.99663	PF00366	PTHR10744	KOG1728		K02949	AT3G48930.1	EMB1080	Nucleic acid-binding, OB-fold-like protein				Ribosome	GO:0009793 embryo development ending in seed dormancy;GO:0003735 structural constituent of ribosome;GO:0006412 translation;GO:0022627 cytosolic small ribosomal subunit;GO:0022626 cytosolic ribosome;GO:0022626 cytosolic ribosome;GO:0005618 cell wall;GO:0016020 membrane;GO:0022627 cytosolic small ribosomal subunit;GO:0005829 cytosol
Pp1s215_26V6	1.17814	0.922741	4.43952	2.46318		75	52	648	186	2.26285	1.89571	21.6984	5.51429
Pp1s218_121V6	0.704211	1.1765	4.56931	2.3249		54	62	709	169	1.62925	2.26027	23.741	5.0103	PF00583	PTHR10545	KOG3216			AT2G39020.1		Acyl-CoA N-acyltransferases (NAT) superfamily protein					GO:0008080 N-acetyltransferase activity;GO:0008080 N-acetyltransferase activity;GO:0008152 metabolic process;GO:0008152 metabolic process;GO:0009507 chloroplast
Pp1s22_325V6	0.756679	0.470229	4.31399	1.46318		56	38	594	93	1.6896	1.38533	19.8902	2.75715	PF00584					AT4G14870.1	SECE1	secE/sec61-gamma protein transport protein					GO:0015450 P-P-bond-hydrolysis-driven protein transmembrane transporter activity;GO:0005515 protein binding;GO:0009535 chloroplast thylakoid membrane;GO:0009507 chloroplast;GO:0009535 chloroplast thylakoid membrane;GO:0009535 chloroplast thylakoid membrane;GO:0010027 thylakoid membrane organization
Pp1s222_123V6	-1.35024	-3.32193	3.34284	0.830907		13	0	303	60	0.392228	0	10.146	1.7788
Pp1s224_46V6	-0.465714	-0.0772588	2.65426	0.383448		24	26	188	44	0.724113	0.947857	6.29522	1.30446	PF00291	PTHR10314				AT1G48420.1	D-CDES	D-cysteine desulfhydrase					GO:0003824 catalytic activity;GO:0009507 chloroplast;GO:0005739 mitochondrion;GO:0008660 1-aminocyclopropane-1-carboxylate deaminase activity;GO:0019148 D-cysteine desulfhydrase activity;GO:0046686 response to cadmium ion;GO:0009507 chloroplast;GO:0008660 1-aminocyclopropane-1-carboxylate deaminase activity;GO:0009693 ethylene biosynthetic process;GO:0050897 cobalt ion binding;GO:0005829 cytosol
Pp1s233_54V6	0.375588	0.309764	3.16576	0.350281		43	34	268	43	1.29737	1.23951	8.97403	1.27481	PF03168					AT4G13270.1		Late embryogenesis abundant (LEA) hydroxyproline-rich glycoprotein family					GO:0003674 molecular_function;GO:0008150 biological_process
Pp1s235_61V6	3.34164	2.74586	5.41368	3.21864		336	184	1273	314	10.1376	6.70791	42.6266	9.30907	PF02469
Pp1s241_66V6	4.47092	2.88051	7.87836	5.84362		735	202	7027	1937	22.176	7.36412	235.3	57.4257	PF00504	PTHR21649			K08908	AT3G61470.1	LHCA2	photosystem I light harvesting complex gene 2				Photosynthesis - antenna proteins	GO:0009768 "photosynthesis, light harvesting in photosystem I";GO:0009782 photosystem I antenna complex;GO:0015979 photosynthesis;GO:0016168 chlorophyll binding;GO:0030076 light-harvesting complex;GO:0009535 chloroplast thylakoid membrane;GO:0009507 chloroplast;GO:0009535 chloroplast thylakoid membrane;GO:0009535 chloroplast thylakoid membrane;GO:0016020 membrane;GO:0009507 chloroplast;GO:0009579…
Pp1s247_7V6	3.46502	1.57985	6.5452	2.71192		366	82	2789	221	11.0427	2.98939	93.3902	6.55193	PF00504	PTHR21649			K08907	AT3G54890.1	LHCA1	photosystem I light harvesting complex gene 1				Photosynthesis - antenna proteins	GO:0015979 photosynthesis;GO:0016168 chlorophyll binding;GO:0030076 light-harvesting complex;GO:0009941 chloroplast envelope;GO:0009941 chloroplast envelope;GO:0009941 chloroplast envelope;GO:0009535 chloroplast thylakoid membrane;GO:0009535 chloroplast thylakoid membrane;GO:0009535 chloroplast thylakoid membrane;GO:0009507 chloroplast;GO:0009507 chloroplast;GO:0009507 chloroplast;GO:0009535 chlo…
Pp1s254_3V6	5.61644	2.84435	9.28795	5.59467		1626	197	18668	1630	49.0586	7.18184	625.102	48.3242	PF00504	PTHR21649			K08914	AT5G54270.1	LHCB3	light-harvesting chlorophyll B-binding protein 3				Photosynthesis - antenna proteins;Metabolic pathways	GO:0015979 photosynthesis;GO:0030076 light-harvesting complex;GO:0005198 structural molecule activity;GO:0009535 chloroplast thylakoid membrane;GO:0009507 chloroplast;GO:0009535 chloroplast thylakoid membrane;GO:0009535 chloroplast thylakoid membrane;GO:0009507 chloroplast;GO:0009579 thylakoid;GO:0015979 photosynthesis
Pp1s255_55V6	3.44917	0.579854	5.78966	2.70538		362	41	1652	220	10.922	1.4947	55.3175	6.52228	PF00581					AT5G23060.1	CaS	calcium sensing receptor					GO:0005739 mitochondrion;GO:0009535 chloroplast thylakoid membrane;GO:0009507 chloroplast;GO:0009535 chloroplast thylakoid membrane;GO:0009535 chloroplast thylakoid membrane;GO:0009507 chloroplast;GO:0009507 chloroplast;GO:0009579 thylakoid;GO:0071277 cellular response to calcium ion;GO:0090333 regulation of stomatal closure;GO:0009579 thylakoid
Pp1s258_80V6	3.65323	1.48909	6.45667	3.72815		417	77	2623	447	12.5815	2.80711	87.8316	13.2521						AT2G38140.1	PSRP4	plastid-specific ribosomal protein 4					GO:0003735 structural constituent of ribosome;GO:0005840 ribosome;GO:0006412 translation;GO:0009507 chloroplast
Pp1s259_69V6	-1.72875	-3.32193	2.04218	-2.26863		10	0	123	7	0.301714	0	4.11868	0.207527						AT3G21055.1	PSBTN	photosystem II subunit T					GO:0003674 molecular_function;GO:0008150 biological_process;GO:0009507 chloroplast;GO:0009543 chloroplast thylakoid lumen;GO:0030095 chloroplast photosystem II
Pp1s260_14V6	-0.880751	-0.254137	1.74352	-0.491021		18	23	100	24	0.543085	0.838489	3.34852	0.711521	PF01851	PTHR10943	KOG2062		K03032	AT2G32730.1		26S proteasome regulatory complex, non-ATPase subcomplex, Rpn2/Psmd1 subunit				Proteasome	GO:0005488 binding;GO:0008540 "proteasome regulatory particle, base subcomplex";GO:0030234 enzyme regulator activity;GO:0006511 ubiquitin-dependent protein catabolic process;GO:0005829 cytosol;GO:0000502 proteasome complex;GO:0005829 cytosol;GO:0008540 "proteasome regulatory particle, base subcomplex"
Pp1s266_66V6	-3.32193	-3.7777	2.51752	-3.32193		0	2	171	0	0	0.0729121	5.72597	0	PF03330,PF01357					AT5G56320.1	EXPA14	expansin A14					GO:0005576 extracellular region;GO:0009826 unidimensional cell growth;GO:0009828 plant-type cell wall loosening;GO:0009831 plant-type cell wall modification involved in multidimensional cell growth;GO:0012505 endomembrane system;GO:0009826 unidimensional cell growth;GO:0009828 plant-type cell wall loosening
Pp1s267_10V6	3.8073	3.99709	7.46763	4.23236		464	438	5286	634	13.9995	15.9677	177.003	18.796	PF07994,PF01658	PTHR11510	KOG0693	5.5.1.4	K01858	AT2G22240.1	MIPS2	myo-inositol-1-phosphate synthase 2				Inositol phosphate metabolism;Metabolic pathways;Biosynthesis of secondary metabolites	GO:0004512 inositol-3-phosphate synthase activity;GO:0006021 inositol biosynthetic process;GO:0008654 phospholipid biosynthetic process;GO:0009733 response to auxin stimulus;GO:0016036 cellular response to phosphate starvation;GO:0009408 response to heat;GO:0009644 response to high light intensity;GO:0042542 response to hydrogen peroxide;GO:0010264 myo-inositol hexakisphosphate biosynthetic proce…
Pp1s268_35V6	1.23473	2.738	4.81563	2.41587		78	183	841	180	2.35337	6.67145	28.161	5.33641	PF11976,PF00240,PF01020	PTHR10666	KOG0003		K02927	AT3G52590.1	UBQ1	ubiquitin extension protein 1					GO:0009793 embryo development ending in seed dormancy;GO:0003735 structural constituent of ribosome;GO:0016567 protein ubiquitination
Pp1s271_29V6	-4.05068	-2.45577	2.05386	-2.26863		2	5	124	7	0.0603427	0.18228	4.15216	0.207527	PF09341					AT5G53045.1							GO:0003674 molecular_function;GO:0005575 cellular_component;GO:0008150 biological_process
Pp1s279_27V6	2.78221	3.27758	6.4317	2.95192		228	266	2578	261	6.87907	9.69731	86.3248	7.73779	PF01200	PTHR10769	KOG3502		K02979	AT5G03850.1		Nucleic acid-binding, OB-fold-like protein				Ribosome	GO:0003735 structural constituent of ribosome;GO:0003735 structural constituent of ribosome;GO:0003735 structural constituent of ribosome;GO:0005840 ribosome;GO:0006407 rRNA export from nucleus;GO:0006412 translation;GO:0006412 translation;GO:0042254 ribosome biogenesis;GO:0005886 plasma membrane;GO:0005618 cell wall;GO:0022627 cytosolic small ribosomal subunit;GO:0005829 cytosol
Pp1s28_306V6	-1.24332	-0.690236	2.36645	-0.0315894		14	17	154	33	0.422399	0.619753	5.15672	0.978342	PF01198	PTHR10956	KOG0893		K02910	AT2G19740.1		Ribosomal protein L31e family protein				Ribosome	GO:0003735 structural constituent of ribosome;GO:0003735 structural constituent of ribosome;GO:0005840 ribosome;GO:0006412 translation;GO:0006412 translation;GO:0042254 ribosome biogenesis;GO:0022626 cytosolic ribosome;GO:0005886 plasma membrane;GO:0022625 cytosolic large ribosomal subunit;GO:0009507 chloroplast
Pp1s284_11V6	-3.32193	-3.7777	2.34759	-3.32193		0	2	152	0	0	0.0729121	5.08975	0	PF11976,PF00240,PF01020	PTHR10666	KOG0003		K02927	AT2G36170.1		Ubiquitin supergroup;Ribosomal protein L40e				Ribosome	GO:0003735 structural constituent of ribosome;GO:0006412 translation;GO:0005730 nucleolus;GO:0022625 cytosolic large ribosomal subunit
Pp1s296_59V6	4.18534	-1.45577	6.16912	3.28157		603	10	2149	328	18.1933	0.36456	71.9597	9.72413
Pp1s3_513V6	-2.72875	1.35158	3.43952	0.350281		5	70	324	43	0.150857	2.55192	10.8492	1.27481	PF00584	PTHR12309	KOG3498			AT4G24920.1		secE/sec61-gamma protein transport protein				Protein export;Protein processing in endoplasmic reticulum;Phagosome	GO:0006605 protein targeting;GO:0006605 protein targeting;GO:0006886 intracellular protein transport;GO:0006886 intracellular protein transport;GO:0015031 protein transport;GO:0015450 P-P-bond-hydrolysis-driven protein transmembrane transporter activity
Pp1s30_263V6	-1.14379	0.266696	3.97003	1.1908		15	33	468	77	0.45257	1.20305	15.6711	2.2828	PF00498	PTHR23308				AT2G21530.1		SMAD/FHA domain-containing protein					GO:0008150 biological_process;GO:0009535 chloroplast thylakoid membrane;GO:0009535 chloroplast thylakoid membrane;GO:0009507 chloroplast;GO:0009570 chloroplast stroma
Pp1s301_31V6	1.2531	1.57985	6.87939	3.8399		79	82	3516	483	2.38354	2.98939	117.734	14.3194						AT1G75690.1		DnaJ/Hsp40 cysteine-rich domain superfamily protein					GO:0006457 protein folding;GO:0031072 heat shock protein binding;GO:0051082 unfolded protein binding;GO:0009507 chloroplast;GO:0009535 chloroplast thylakoid membrane;GO:0009535 chloroplast thylakoid membrane;GO:0009570 chloroplast stroma;GO:0009507 chloroplast
Pp1s302_11V6	2.78853	1.64857	4.78091	2.20942		229	86	821	156	6.90924	3.13522	27.4913	4.62489						AT5G16660.1							GO:0003674 molecular_function;GO:0008150 biological_process;GO:0009941 chloroplast envelope;GO:0009535 chloroplast thylakoid membrane;GO:0016020 membrane;GO:0016020 membrane;GO:0009507 chloroplast;GO:0009507 chloroplast
Pp1s306_84V6	3.3502	1.00366	6.48337	3.12369		338	55	2672	294	10.1979	2.00508	89.4724	8.71614	PF01716				K02716	AT3G50820.1	PSBO2	photosystem II subunit O-2				Photosynthesis;Metabolic pathways	GO:0009654 oxygen evolving complex;GO:0030095 chloroplast photosystem II;GO:0009543 chloroplast thylakoid lumen;GO:0031977 thylakoid lumen;GO:0009543 chloroplast thylakoid lumen;GO:0009579 thylakoid;GO:0010242 oxygen evolving activity;GO:0019684 "photosynthesis, light reaction";GO:0009535 chloroplast thylakoid membrane;GO:0009579 thylakoid;GO:0009507 chloroplast;GO:0009535 chloroplast thylakoid m…
Pp1s313_58V6	-3.32193	-3.7777	3.32849	-3.32193		0	2	300	0	0	0.0729121	10.0456	0	PF03330,PF01357					AT4G28250.1	EXPB3	expansin B3					GO:0005576 extracellular region;GO:0005576 extracellular region;GO:0009664 plant-type cell wall organization;GO:0009826 unidimensional cell growth;GO:0009828 plant-type cell wall loosening;GO:0012505 endomembrane system;GO:0012505 endomembrane system;GO:0009826 unidimensional cell growth;GO:0009828 plant-type cell wall loosening;GO:0006949 syncytium formation
Pp1s319_36V6	1.40876	0.392227	3.86454	1.55337		88	36	435	99	2.65508	1.31242	14.5661	2.93503	PF02427				K02693	AT2G20260.1	PSAE-2	photosystem I subunit E-2				Photosynthesis;Metabolic pathways	GO:0003824 catalytic activity;GO:0009538 photosystem I reaction center;GO:0015979 photosynthesis;GO:0009535 chloroplast thylakoid membrane;GO:0009507 chloroplast;GO:0009535 chloroplast thylakoid membrane;GO:0009535 chloroplast thylakoid membrane;GO:0010287 plastoglobule;GO:0009507 chloroplast;GO:0009579 thylakoid
Pp1s347_12V6	0.119249	-1.31827	3.24941	1.2278		36	11	284	79	1.08617	0.401016	9.50979	2.34209	PF00483,PF00132	PTHR22572	KOG1322	2.7.7.27	K00975	AT5G19220.1	APL1	ADP glucose pyrophosphorylase large subunit 1				Starch and sucrose metabolism;Amino sugar and nucleotide sugar metabolism;Metabolic pathways	GO:0008878 glucose-1-phosphate adenylyltransferase activity;GO:0009058 biosynthetic process;GO:0009941 chloroplast envelope;GO:0009570 chloroplast stroma;GO:0009507 chloroplast;GO:0008878 glucose-1-phosphate adenylyltransferase activity;GO:0008878 glucose-1-phosphate adenylyltransferase activity;GO:0009570 chloroplast stroma
Pp1s358_60V6	-0.40682	-1.45577	3.65426	1.29906		25	10	376	83	0.754284	0.36456	12.5904	2.46068	PF00445	PTHR11240	KOG1642	3.1.27.1	K01166	AT2G02990.1	RNS1	ribonuclease 1					GO:0004521 endoribonuclease activity;GO:0009611 response to wounding;GO:0009867 jasmonic acid mediated signaling pathway;GO:0005618 cell wall;GO:0005886 plasma membrane;GO:0004540 ribonuclease activity;GO:0007568 aging;GO:0016036 cellular response to phosphate starvation;GO:0016036 cellular response to phosphate starvation;GO:0005576 extracellular region;GO:0009718 anthocyanin biosynthetic proces…
Pp1s37_298V6	1.62175	0.431755	5.03188	1.17194		102	37	977	76	3.07748	1.34887	32.715	2.25315	PF10674					AT5G58250.1							GO:0003674 molecular_function;GO:0008150 biological_process;GO:0009579 thylakoid;GO:0009507 chloroplast;GO:0009507 chloroplast
Pp1s37_309V6	2.22545	0.894727	5.36879	2.2278		155	51	1234	158	4.67656	1.85926	41.3207	4.68418	PF01761	PTHR21090		4.2.3.4	K01735	AT5G66120.2		3-dehydroquinate synthase, putative				Phenylalanine, tyrosine and tryptophan biosynthesis;Metabolic pathways;Biosynthesis of secondary metabolites	GO:0003856 3-dehydroquinate synthase activity;GO:0003856 3-dehydroquinate synthase activity;GO:0009058 biosynthetic process;GO:0009073 aromatic amino acid family biosynthetic process;GO:0009073 aromatic amino acid family biosynthetic process;GO:0016838 "carbon-oxygen lyase activity, acting on phosphates";GO:0009507 chloroplast;GO:0009507 chloroplast
Pp1s37_66V6	-0.192695	1.1765	3.65041	1.0533		29	62	375	70	0.87497	2.26027	12.5569	2.07527	PF00181,PF03947	PTHR13691	KOG2309		K02938	AT4G36130.1		Ribosomal protein L2 family				Ribosome	GO:0003735 structural constituent of ribosome;GO:0003735 structural constituent of ribosome;GO:0005840 ribosome;GO:0006412 translation;GO:0006412 translation;GO:0005773 vacuole;GO:0022626 cytosolic ribosome;GO:0005886 plasma membrane;GO:0022625 cytosolic large ribosomal subunit
Pp1s37_67V6	2.12923	2.58862	5.9623	3.29906		145	165	1862	332	4.37485	6.01525	62.3494	9.84271	PF01042	PTHR11803	KOG2317			AT3G20390.1		endoribonuclease L-PSP family protein					GO:0004521 endoribonuclease activity;GO:0009507 chloroplast;GO:0005773 vacuole;GO:0046686 response to cadmium ion;GO:0005739 mitochondrion;GO:0009536 plastid;GO:0009579 thylakoid;GO:0009507 chloroplast
Pp1s371_45V6	-3.32193	2.21099	5.88675	2.63138		0	127	1767	209	0	4.62992	59.1683	6.19617		PTHR14154				AT3G22840.1	ELIP1	Chlorophyll A-B binding family protein					GO:0016168 chlorophyll binding;GO:0009409 response to cold;GO:0080167 response to karrikin
Pp1s398_10V6	-1.14379	-1.07726	2.43058	-1.07598		15	13	161	16	0.45257	0.473928	5.39112	0.474348	PF06886					AT4G32330.3		TPX2 (targeting protein for Xklp2) protein family					GO:0003674 molecular_function;GO:0005575 cellular_component;GO:0008150 biological_process
Pp1s404_31V6	-1.72875	-2.7777	2.75072	0.596442		10	4	201	51	0.301714	0.145824	6.73052	1.51198	PF08323,PF00534	PTHR12526		2.4.1.21	K00703	AT5G24300.2	SSI1	Glycogen/starch synthases, ADP-glucose type				Starch and sucrose metabolism;Metabolic pathways	GO:0009011 starch synthase activity;GO:0009011 starch synthase activity;GO:0016757 "transferase activity, transferring glycosyl groups";GO:0009507 chloroplast;GO:0010021 amylopectin biosynthetic process;GO:0009570 chloroplast stroma;GO:0009507 chloroplast;GO:0009570 chloroplast stroma
Pp1s41_19V6	-1.72875	-2.7777	2.23922	-0.0315894		10	4	141	33	0.301714	0.145824	4.72141	0.978342	PF02854,PF09088,PF09090	PTHR12412	KOG1104		K12882	AT2G13540.1	ABH1	ARM repeat superfamily protein				RNA transport;mRNA surveillance pathway;Spliceosome	GO:0006412 translation;GO:0009887 organ morphogenesis;GO:0000339 RNA cap binding;GO:0009737 response to abscisic acid stimulus;GO:0005634 nucleus;GO:0048574 "long-day photoperiodism, flowering";GO:0000394 "RNA splicing, via endonucleolytic cleavage and ligation";GO:0031053 primary microRNA processing;GO:0005515 protein binding;GO:0005829 cytosol
Pp1s421_8V6	-0.0506763	-0.318267	4.02151	0.731371		32	22	485	56	0.965484	0.802033	16.2403	1.66022	PF03134	PTHR12300				AT2G42820.1	HVA22F	HVA22-like protein F					GO:0003674 molecular_function;GO:0008150 biological_process;GO:0012505 endomembrane system
Pp1s44_238V6	-0.350237	1.24467	3.98231	1.87821		26	65	472	124	0.784455	2.36964	15.805	3.67619	PF01965	PTHR11019	KOG2764		K03152	AT1G53280.1		Class I glutamine amidotransferase-like superfamily protein					GO:0008150 biological_process;GO:0009507 chloroplast
Pp1s45_25V6	1.27125	2.65693	5.4638	2.96841		80	173	1318	264	2.41371	6.30689	44.1335	7.82674	PF11820					AT5G63500.1		Protein of unknown function (DUF 3339)					GO:0003674 molecular_function;GO:0008150 biological_process;GO:0031225 anchored to membrane;GO:0031225 anchored to membrane
Pp1s45_62V6	1.11925	-1.97034	3.22895	0.0114793		72	7	280	34	2.17234	0.255192	9.37585	1.00799	PF00364					AT3G56130.1		biotin/lipoyl attachment domain-containing protein					GO:0005488 binding;GO:0009507 chloroplast;GO:0009507 chloroplast;GO:0009507 chloroplast
Pp1s45_64V6	-4.05068	-1.31827	2.35705	-0.754055		2	11	153	20	0.0603427	0.401016	5.12323	0.592934	PF01247	PTHR10902	KOG0887		K02917	AT1G41880.1		Ribosomal protein L35Ae family protein				Ribosome	GO:0003735 structural constituent of ribosome;GO:0003735 structural constituent of ribosome;GO:0005840 ribosome;GO:0006412 translation;GO:0006412 translation;GO:0042254 ribosome biogenesis;GO:0016020 membrane;GO:0022625 cytosolic large ribosomal subunit;GO:0005829 cytosol
Pp1s472_14V6	-4.05068	-3.32193	2.71438	-1.37554		2	0	196	13	0.0603427	0	6.5631	0.385407	PF00504	PTHR21649			K08915	AT3G08940.2	LHCB4.2	light harvesting complex photosystem II				Photosynthesis - antenna proteins;Metabolic pathways	GO:0016168 chlorophyll binding;GO:0009941 chloroplast envelope;GO:0009941 chloroplast envelope;GO:0009535 chloroplast thylakoid membrane;GO:0009535 chloroplast thylakoid membrane;GO:0009507 chloroplast;GO:0009507 chloroplast;GO:0009535 chloroplast thylakoid membrane;GO:0009535 chloroplast thylakoid membrane;GO:0009535 chloroplast thylakoid membrane;GO:0016020 membrane;GO:0016020 membrane;GO:00095…
Pp1s49_270V6	1.48848	-0.318267	4.29688	2.27274		93	22	587	163	2.80594	0.802033	19.6558	4.83242	PF03721,PF00984,PF03720	PTHR11374	KOG2666	1.1.1.22	K00012	AT3G29360.1		UDP-glucose 6-dehydrogenase family protein				Pentose and glucuronate interconversions;Ascorbate and aldarate metabolism;Starch and sucrose metabolism;Amino sugar and nucleotide sugar metabolism;Metabolic pathways;Biosynthesis of secondary metabolites	GO:0003824 catalytic activity;GO:0003824 catalytic activity;GO:0003979 UDP-glucose 6-dehydrogenase activity;GO:0005488 binding;GO:0005488 binding;GO:0008152 metabolic process;GO:0008152 metabolic process;GO:0016491 oxidoreductase activity;GO:0016491 oxidoreductase activity;GO:0016616 "oxidoreductase activity, acting on the CH-OH group of donors, NAD or NADP as acceptor";GO:0016616 "oxidoreductase…
Pp1s49_32V6	-0.295789	-3.7777	2.05386	-0.754055		27	2	124	20	0.814627	0.0729121	4.15216	0.592934	PF08246,PF00112,PF00396	PTHR12411	KOG1543	3.4.22.-	K01376	AT1G47128.1	RD21	Granulin repeat cysteine protease family protein					GO:0004197 cysteine-type endopeptidase activity;GO:0008234 cysteine-type peptidase activity;GO:0008234 cysteine-type peptidase activity;GO:0009507 chloroplast;GO:0005773 vacuole;GO:0005773 vacuole;GO:0048046 apoplast;GO:0005515 protein binding;GO:0005829 cytosol;GO:0009414 response to water deprivation
Pp1s49_42V6	2.19725	1.88051	4.73629	2.09394		152	101	796	144	4.58605	3.68206	26.6542	4.26913						AT4G01150.1							GO:0003674 molecular_function;GO:0008150 biological_process;GO:0009941 chloroplast envelope;GO:0009535 chloroplast thylakoid membrane;GO:0009507 chloroplast;GO:0009535 chloroplast thylakoid membrane;GO:0009535 chloroplast thylakoid membrane;GO:0010287 plastoglobule;GO:0010287 plastoglobule;GO:0009507 chloroplast;GO:0009507 chloroplast;GO:0009579 thylakoid
Pp1s5_343V6	-0.143786	-1.19274	2.80703	-0.828056		30	12	209	19	0.905141	0.437472	6.9984	0.563288	PF00860	PTHR11119	KOG1292			AT2G27810.1	NAT12	nucleobase-ascorbate transporter 12					GO:0006810 transport;GO:0006810 transport;GO:0006810 transport;GO:0016020 membrane;GO:0022857 transmembrane transporter activity;GO:0022857 transmembrane transporter activity;GO:0055085 transmembrane transport;GO:0055085 transmembrane transport;GO:0055085 transmembrane transport;GO:0005886 plasma membrane;GO:0005886 plasma membrane;GO:0005886 plasma membrane;GO:0005886 plasma membrane;GO:0005886 …
Pp1s51_335V6	-2.24332	-2.7777	2.79315	-1.16909		7	4	207	15	0.2112	0.145824	6.93143	0.444701	PF00407,PF10604					AT1G24020.2	MLP423	MLP-like protein 423					GO:0006952 defense response;GO:0006952 defense response;GO:0009607 response to biotic stimulus;GO:0009607 response to biotic stimulus;GO:0016020 membrane
Pp1s54_165V6	0.158777	-0.777698	4.67898	1.50898		37	16	765	96	1.11634	0.583297	25.6162	2.84609	PF02605				K02699	AT4G12800.1	PSAL	photosystem I subunit l				Photosynthesis;Metabolic pathways	GO:0003674 molecular_function;GO:0009538 photosystem I reaction center;GO:0015979 photosynthesis;GO:0019684 "photosynthesis, light reaction";GO:0009941 chloroplast envelope;GO:0009535 chloroplast thylakoid membrane;GO:0009507 chloroplast;GO:0009535 chloroplast thylakoid membrane;GO:0009535 chloroplast thylakoid membrane;GO:0010287 plastoglobule;GO:0016020 membrane;GO:0009507 chloroplast;GO:000957…
Pp1s545_14V6	2.31565	3.40221	5.50693	3.28157		165	290	1358	328	4.97828	10.5723	45.4729	9.72413	PF02469
Pp1s55_141V6	0.534286	-0.254137	2.82759	0.705376		48	23	212	55	1.44823	0.838489	7.09886	1.63057	PF09273	PTHR13271	KOG1337			AT5G14260.3		Rubisco methyltransferase family protein					GO:0003674 molecular_function;GO:0008150 biological_process;GO:0009507 chloroplast;GO:0009507 chloroplast;GO:0009507 chloroplast
Pp1s56_219V6	-1.05068	0.129192	2.5591	0.0939415		16	30	176	36	0.482742	1.09368	5.89339	1.06728	PF00118	PTHR11353	KOG0364			AT5G26360.1		TCP-1/cpn60 chaperonin family protein					GO:0005524 ATP binding;GO:0006457 protein folding;GO:0044267 cellular protein metabolic process;GO:0051082 unfolded protein binding;GO:0005829 cytosol
Pp1s6_43V6	1.35871	0.351585	4.41934	1.782		85	35	639	116	2.56457	1.27596	21.397	3.43902		PTHR13683	KOG1339			AT5G10080.1		Eukaryotic aspartyl protease family protein					GO:0004190 aspartic-type endopeptidase activity;GO:0006508 proteolysis;GO:0006508 proteolysis;GO:0031225 anchored to membrane;GO:0031225 anchored to membrane;GO:0046658 anchored to plasma membrane
Pp1s62_88V6	-3.32193	1.5077	3.96075	0.171944		0	78	465	38	0	2.84357	15.5706	1.12658
Pp1s628_7V6	3.73723	0.614619	5.88757	2.00083		442	42	1768	135	13.3357	1.53115	59.2018	4.00231	PF00504	PTHR21649			K08916	AT4G10340.1	LHCB5	light harvesting complex of photosystem II 5				Photosynthesis - antenna proteins;Metabolic pathways	GO:0009533 chloroplast stromal thylakoid;GO:0015979 photosynthesis;GO:0016168 chlorophyll binding;GO:0016168 chlorophyll binding;GO:0030076 light-harvesting complex;GO:0009783 photosystem II antenna complex;GO:0009535 chloroplast thylakoid membrane;GO:0009507 chloroplast;GO:0009535 chloroplast thylakoid membrane;GO:0009535 chloroplast thylakoid membrane;GO:0010287 plastoglobule;GO:0010287 plastog…
Pp1s64_4V6	1.7695	1.47023	4.18978	2.04296		113	76	545	139	3.40936	2.77066	18.2494	4.12089	PF00313	PTHR11544				AT2G21060.1	GRP2B	glycine-rich protein 2B					GO:0003676 nucleic acid binding;GO:0003676 nucleic acid binding;GO:0003677 DNA binding;GO:0008270 zinc ion binding;GO:0005634 nucleus;GO:0005829 cytosol;GO:0009790 embryo development;GO:0010154 fruit development
Pp1s65_24V6	1.34164	3.08649	5.09685	3.06357		84	233	1022	282	2.53439	8.49426	34.2219	8.36038	PF01248	PTHR23105	KOG3387		K12845	AT4G22380.1		Ribosomal protein L7Ae/L30e/S12e/Gadd45 family protein				Ribosome biogenesis in eukaryotes;Spliceosome	GO:0003723 RNA binding;GO:0042254 ribosome biogenesis;GO:0005730 nucleolus
Pp1s65_6V6	1.01541	-3.19274	3.11089	0.245945		67	3	258	40	2.02148	0.109368	8.63918	1.18587	PF11960,PF00487			1.14.19.-	K10257	AT3G11170.1	FAD7	fatty acid desaturase 7				Biosynthesis of unsaturated fatty acids	GO:0009409 response to cold;GO:0009941 chloroplast envelope;GO:0009941 chloroplast envelope;GO:0009507 chloroplast;GO:0006633 fatty acid biosynthetic process;GO:0009507 chloroplast;GO:0042389 omega-3 fatty acid desaturase activity;GO:0009507 chloroplast;GO:0042170 plastid membrane
Pp1s74_243V6	0.472886	-0.690236	4.28702	0.316334		46	17	583	42	1.38788	0.619753	19.5219	1.24516	PF00575,PF00627,PF00889	PTHR11741	KOG1071			AT4G29060.1	emb2726	elongation factor Ts family protein					GO:0003723 RNA binding;GO:0003723 RNA binding;GO:0003746 translation elongation factor activity;GO:0003746 translation elongation factor activity;GO:0003746 translation elongation factor activity;GO:0006414 translational elongation;GO:0009793 embryo development ending in seed dormancy;GO:0009941 chloroplast envelope;GO:0009507 chloroplast;GO:0046686 response to cadmium ion;GO:0046686 response to …
Pp1s75_70V6	-0.350237	-0.022811	3.5591	0.756907		26	27	352	57	0.784455	0.984313	11.7868	1.68986	PF05129	PTHR20934	KOG3214			AT5G46030.1							GO:0003674 molecular_function;GO:0008150 biological_process
Pp1s79_23V6	-1.14379	0.894727	4.34522	1.85475		15	51	607	122	0.45257	1.85926	20.3255	3.6169				1.-.-.-	K00540	AT3G59840.1							GO:0003674 molecular_function;GO:0008150 biological_process;GO:0009941 chloroplast envelope;GO:0009507 chloroplast
Pp1s80_200V6	-1.24332	-3.19274	2.37579	-0.988521		14	3	155	17	0.422399	0.109368	5.1902	0.503994	PF01055	PTHR22762	KOG1065			AT1G68560.1	XYL1	alpha-xylosidase 1					GO:0004553 "hydrolase activity, hydrolyzing O-glycosyl compounds";GO:0009044 "xylan 1,4-beta-xylosidase activity";GO:0009507 chloroplast;GO:0045493 xylan catabolic process;GO:0046556 alpha-N-arabinofuranosidase activity;GO:0005618 cell wall;GO:0048046 apoplast;GO:0009505 plant-type cell wall;GO:0009505 plant-type cell wall;GO:0046686 response to cadmium ion;GO:0010411 xyloglucan metabolic process…
Pp1s83_237V6	-0.728748	0.837011	2.86122	0.508979		20	49	217	48	0.603427	1.78635	7.26629	1.42304		PTHR14270
Pp1s89_183V6	-0.295789	-0.133842	2.85455	0.806659		27	25	216	59	0.814627	0.911401	7.2328	1.74916						AT5G23890.1							GO:0009941 chloroplast envelope;GO:0009941 chloroplast envelope;GO:0009941 chloroplast envelope;GO:0009507 chloroplast;GO:0009535 chloroplast thylakoid membrane;GO:0009535 chloroplast thylakoid membrane;GO:0005739 mitochondrion;GO:0009536 plastid;GO:0009507 chloroplast
Pp1s89_30V6	-0.963213	0.176498	2.47471	0.538726		17	31	166	49	0.512913	1.13014	5.55854	1.45269	PF05241	PTHR14207	KOG4826	5.3.3.5	K01824	AT1G20050.1	HYD1	C-8,7 sterol isomerase				Steroid biosynthesis;Metabolic pathways;Biosynthesis of secondary metabolites	GO:0016126 sterol biosynthetic process;GO:0005886 plasma membrane;GO:0000247 C-8 sterol isomerase activity
Pp1s9_38V6	1.34164	0.507704	5.23152	0.830907		84	39	1122	60	2.53439	1.42179	37.5704	1.7788						AT4G01150.1							GO:0003674 molecular_function;GO:0008150 biological_process;GO:0009941 chloroplast envelope;GO:0009535 chloroplast thylakoid membrane;GO:0009507 chloroplast;GO:0009535 chloroplast thylakoid membrane;GO:0009535 chloroplast thylakoid membrane;GO:0010287 plastoglobule;GO:0010287 plastoglobule;GO:0009507 chloroplast;GO:0009507 chloroplast;GO:0009579 thylakoid
Pp1s9_406V6	0.807305	-0.529771	3.54261	0.209419		58	19	348	39	1.74994	0.692665	11.6528	1.15622						AT1G15140.1		FAD/NAD(P)-binding oxidoreductase					GO:0016491 oxidoreductase activity;GO:0055114 oxidation-reduction process;GO:0055114 oxidation-reduction process;GO:0055114 oxidation-reduction process;GO:0009941 chloroplast envelope;GO:0009570 chloroplast stroma;GO:0009579 thylakoid;GO:0009579 thylakoid;GO:0009579 thylakoid;GO:0009507 chloroplast;GO:0009507 chloroplast;GO:0009507 chloroplast;GO:0009570 chloroplast stroma;GO:0005507 copper ion b…
Pp1s38_390V6	-3.32193	0.866158	3.08835	-0.268629		0	50	254	28	0	1.8228	8.50524	0.830108		PTHR13683	KOG1339			AT3G25700.1		Eukaryotic aspartyl protease family protein					GO:0004190 aspartic-type endopeptidase activity;GO:0004190 aspartic-type endopeptidase activity;GO:0006508 proteolysis;GO:0006508 proteolysis
Pp1s33_144V6	-1.24332	0.431755	4.18448	-0.375544		14	37	543	26	0.422399	1.34887	18.1825	0.770815	PF08323,PF00534	PTHR12526		2.4.1.242	K13679	AT1G32900.1		UDP-Glycosyltransferase superfamily protein					GO:0009058 biosynthetic process;GO:0009250 glucan biosynthetic process;GO:0016757 "transferase activity, transferring glycosyl groups";GO:0016757 "transferase activity, transferring glycosyl groups";GO:0009507 chloroplast;GO:0009507 chloroplast;GO:0005515 protein binding
Pp1s26_289V6	0.441177	0.837011	4.6291	0.478605		45	49	739	47	1.35771	1.78635	24.7456	1.3934	PF01248	PTHR11843	KOG3406		K02951	AT2G32060.3		Ribosomal protein L7Ae/L30e/S12e/Gadd45 family protein				Ribosome	GO:0003735 structural constituent of ribosome;GO:0006412 translation;GO:0005634 nucleus;GO:0005634 nucleus;GO:0005634 nucleus;GO:0022626 cytosolic ribosome;GO:0022626 cytosolic ribosome;GO:0022626 cytosolic ribosome;GO:0022626 cytosolic ribosome;GO:0022626 cytosolic ribosome;GO:0022626 cytosolic ribosome;GO:0022626 cytosolic ribosome;GO:0022627 cytosolic small ribosomal subunit
Pp1s269_11V6	0.341641	1.41213	5.56319	0.731371		42	73	1412	56	1.2672	2.66129	47.2811	1.66022	PF00153	PTHR11896	KOG0749		K05863	AT4G28390.1	AAC3	ADP/ATP carrier 3					GO:0005471 ATP:ADP antiporter activity;GO:0005488 binding;GO:0005743 mitochondrial inner membrane;GO:0006810 transport;GO:0006839 mitochondrial transport;GO:0005471 ATP:ADP antiporter activity;GO:0015865 purine nucleotide transport;GO:0016020 membrane;GO:0009941 chloroplast envelope;GO:0005739 mitochondrion;GO:0016020 membrane
Pp1s147_89V6	2.42506	2.34124	4.87281	0.731371		178	139	875	56	5.3705	5.06739	29.2995	1.66022	PF07716,PF00170					AT4G37730.1	bZIP7	basic leucine-zipper 7					GO:0003677 DNA binding;GO:0003700 sequence-specific DNA binding transcription factor activity;GO:0006355 "regulation of transcription, DNA-dependent";GO:0006355 "regulation of transcription, DNA-dependent";GO:0003700 sequence-specific DNA binding transcription factor activity;GO:0003700 sequence-specific DNA binding transcription factor activity
Pp1s154_80V6	3.50391	4.59734	7.07408	2.47861		376	664	4024	188	11.3444	24.2068	134.744	5.57358	PF05162
Pp1s184_140V6	1.75668	3.7301	5.69119	2.16242		112	364	1543	151	3.37919	13.27	51.6676	4.47666	PF00187,PF00182	PTHR22595	KOG4742	3.2.1.14	K01183	AT3G54420.1	EP3	homolog of carrot EP3-3 chitinase				Amino sugar and nucleotide sugar metabolism	GO:0004568 chitinase activity;GO:0004568 chitinase activity;GO:0010262 somatic embryogenesis;GO:0005618 cell wall;GO:0009626 plant-type hypersensitive response
Pp1s186_40V6	-0.243321	-0.192736	1.90702	-1.26863		28	24	112	14	0.844798	0.874945	3.75034	0.415054	PF00514
Pp1s210_105V6	0.341641	-0.192736	2.73629	-1.37554		42	24	199	13	1.2672	0.874945	6.66355	0.385407
Pp1s224_44V6	-3.05068	-1.19274	1.89408	-2.75406		4	12	111	5	0.120685	0.437472	3.71686	0.148234	PF00535					AT2G24630.1	ATCSLC08	Glycosyl transferase family 2 protein					GO:0005575 cellular_component;GO:0008150 biological_process;GO:0016757 "transferase activity, transferring glycosyl groups";GO:0016757 "transferase activity, transferring glycosyl groups";GO:0016759 cellulose synthase activity
Pp1s238_51V6	-1.05068	0.176498	2.95142	-1.61655		16	31	231	11	0.482742	1.13014	7.73508	0.326114		PTHR12896			K11375	AT3G11220.2	ELO1	Paxneb protein-related					GO:0003674 molecular_function;GO:0033588 Elongator holoenzyme complex;GO:0033588 Elongator holoenzyme complex;GO:0008283 cell proliferation;GO:0035265 organ growth
Pp1s248_61V6	1.03679	-1.31827	3.13859	-3.32193		68	11	263	0	2.05165	0.401016	8.8066	0					K14332	AT1G08380.1	PSAO	photosystem I subunit O				Photosynthesis	GO:0003674 molecular_function;GO:0009522 photosystem I;GO:0009579 thylakoid;GO:0009768 "photosynthesis, light harvesting in photosystem I";GO:0009507 chloroplast;GO:0009579 thylakoid
Pp1s282_25V6	1.07861	2.16482	4.12203	0.567873		70	123	520	50	2.112	4.48409	17.4123	1.48234	PF08071,PF01479,PF00900,PF00467	PTHR11581	KOG0378		K02987	AT5G07090.1		Ribosomal protein S4 (RPS4A) family protein					GO:0003735 structural constituent of ribosome;GO:0006412 translation;GO:0022627 cytosolic small ribosomal subunit;GO:0022626 cytosolic ribosome;GO:0022626 cytosolic ribosome;GO:0022626 cytosolic ribosome;GO:0005774 vacuolar membrane;GO:0005774 vacuolar membrane;GO:0005515 protein binding;GO:0005829 cytosol;GO:0005829 cytosol
Pp1s297_72V6	-4.05068	-1.45577	3.83776	-3.32193		2	10	427	0	0.0603427	0.36456	14.2982	0	PF00188	PTHR10334	KOG3017			AT1G01310.1		CAP (Cysteine-rich secretory proteins, Antigen 5, and Pathogenesis-related 1 protein) superfamily protein					GO:0003674 molecular_function;GO:0005576 extracellular region;GO:0008150 biological_process
Pp1s303_34V6	-0.465714	0.129192	2.32849	-1.90606		24	30	150	9	0.724113	1.09368	5.02278	0.266821	PF04515	PTHR12385				AT5G13760.1		Plasma-membrane choline transporter family protein					GO:0003674 molecular_function;GO:0005575 cellular_component
Pp1s312_46V6	2.69079	2.77689	7.68299	1.50898		214	188	6137	96	6.45667	6.85373	205.499	2.84609	PF00101					AT1G67090.1	RBCS1A	ribulose bisphosphate carboxylase small chain 1A				Glyoxylate and dicarboxylate metabolism;Carbon fixation in photosynthetic organisms;Metabolic pathways	GO:0009573 chloroplast ribulose bisphosphate carboxylase complex;GO:0015977 carbon fixation;GO:0016984 ribulose-bisphosphate carboxylase activity;GO:0031977 thylakoid lumen;GO:0009579 thylakoid;GO:0009579 thylakoid;GO:0009941 chloroplast envelope;GO:0009941 chloroplast envelope;GO:0009409 response to cold;GO:0009507 chloroplast;GO:0009535 chloroplast thylakoid membrane;GO:0009535 chloroplast thyl…
Pp1s387_50V6	0.158777	0.176498	2.33807	-1.16909		37	31	151	15	1.11634	1.13014	5.05626	0.444701	PF04095	PTHR11098	KOG2511	2.4.2.11	K00763	AT2G23420.1	NAPRT2	nicotinate phosphoribosyltransferase 2				Nicotinate and nicotinamide metabolism;Metabolic pathways	GO:0004516 nicotinate phosphoribosyltransferase activity;GO:0004516 nicotinate phosphoribosyltransferase activity;GO:0005575 cellular_component;GO:0019358 nicotinate nucleotide salvage;GO:0019358 nicotinate nucleotide salvage;GO:0019363 pyridine nucleotide biosynthetic process
Pp1s4_12V6	2.46502	1.54423	4.96849	0.651937		183	80	935	53	5.52136	2.91648	31.3087	1.57128	PF02878,PF02879,PF02880,PF00408	PTHR22573	KOG0625	5.4.2.2	K01835	AT1G70730.3	PGM2	Phosphoglucomutase/phosphomannomutase family protein				Glycolysis / Gluconeogenesis;Pentose phosphate pathway;Galactose metabolism;Purine metabolism;Starch and sucrose metabolism;Amino sugar and nucleotide sugar metabolism;Metabolic pathways;Biosynthesis of secondary metabolites	GO:0004614 phosphoglucomutase activity;GO:0005975 carbohydrate metabolic process;GO:0005992 trehalose biosynthetic process;GO:0006874 cellular calcium ion homeostasis;GO:0009570 chloroplast stroma;GO:0009590 detection of gravity;GO:0010319 stromule;GO:0019252 starch biosynthetic process;GO:0019255 glucose 1-phosphate metabolic process;GO:0019388 galactose catabolic process;GO:0046686 response to …
Pp1s407_31V6	0.441177	-1.07726	3.79663	-2.07598		45	13	415	8	1.35771	0.473928	13.8964	0.237174
Pp1s65_267V6	0.756679	-1.31827	3.10529	-3.49102		56	11	257	3	1.6896	0.401016	8.60569	0.0889402	PF00056,PF02866	PTHR23382	KOG1496			AT5G58330.1		lactate/malate dehydrogenase family protein					GO:0003824 catalytic activity;GO:0003824 catalytic activity;GO:0003824 catalytic activity;GO:0005488 binding;GO:0005488 binding;GO:0005488 binding;GO:0005975 carbohydrate metabolic process;GO:0005975 carbohydrate metabolic process;GO:0005975 carbohydrate metabolic process;GO:0006096 glycolysis;GO:0006108 malate metabolic process;GO:0006108 malate metabolic process;GO:0006108 malate metabolic proc…
Pp1s69_154V6	3.79167	3.283	7.76055	2.47861		459	267	6476	188	13.8487	9.73376	216.85	5.57358	PF00550	PTHR20863				AT3G05020.1	ACP1	acyl carrier protein 1					GO:0006633 fatty acid biosynthetic process;GO:0000036 acyl carrier activity;GO:0009507 chloroplast;GO:0005829 cytosol;GO:0000036 acyl carrier activity
Pp1s99_191V6	0.375588	0.0296564	3.94516	-1.90606		43	28	460	9	1.29737	1.02077	15.4032	0.266821
Pp1s1_789V6	1.97169	0.977189	4.03336	-0.491021		130	54	489	24	3.92228	1.96863	16.3743	0.711521						AT1G33810.1							GO:0003674 molecular_function;GO:0008150 biological_process;GO:0009941 chloroplast envelope;GO:0009535 chloroplast thylakoid membrane;GO:0009535 chloroplast thylakoid membrane;GO:0009507 chloroplast
Pp1s10_102V6	3.84414	4.05202	6.34581	1.44758		476	455	2429	92	14.3616	16.5875	81.3355	2.7275	PF00573	PTHR19431	KOG1475		K02930	AT3G09630.1		Ribosomal protein L4/L1 family					GO:0003735 structural constituent of ribosome;GO:0003735 structural constituent of ribosome;GO:0003735 structural constituent of ribosome;GO:0005840 ribosome;GO:0006412 translation;GO:0006412 translation;GO:0006412 translation;GO:0009507 chloroplast;GO:0005773 vacuole;GO:0005730 nucleolus;GO:0005730 nucleolus;GO:0022626 cytosolic ribosome;GO:0022626 cytosolic ribosome;GO:0022626 cytosolic ribosom…
Pp1s103_80V6	0.271252	-1.97034	2.35705	-4.07598		40	7	153	2	1.20685	0.255192	5.12323	0.0592934						AT4G24930.1		thylakoid lumenal 17.9 kDa protein, chloroplast					GO:0003674 molecular_function;GO:0008150 biological_process;GO:0009543 chloroplast thylakoid lumen;GO:0031977 thylakoid lumen;GO:0009543 chloroplast thylakoid lumen;GO:0009579 thylakoid;GO:0009507 chloroplast;GO:0009579 thylakoid;GO:0009507 chloroplast
Pp1s109_145V6	3.72081	2.42197	7.64993	-1.61655		437	147	5998	11	13.1849	5.35904	200.844	0.326114	PF00101			4.1.1.39	K01602	AT1G67090.1	RBCS1A	ribulose bisphosphate carboxylase small chain 1A				Glyoxylate and dicarboxylate metabolism;Carbon fixation in photosynthetic organisms;Metabolic pathways	GO:0009573 chloroplast ribulose bisphosphate carboxylase complex;GO:0015977 carbon fixation;GO:0016984 ribulose-bisphosphate carboxylase activity;GO:0031977 thylakoid lumen;GO:0009579 thylakoid;GO:0009579 thylakoid;GO:0009941 chloroplast envelope;GO:0009941 chloroplast envelope;GO:0009409 response to cold;GO:0009507 chloroplast;GO:0009535 chloroplast thylakoid membrane;GO:0009535 chloroplast thyl…
Pp1s11_375V6	1.45712	2.80726	4.78442	-1.37554		91	192	823	13	2.74559	6.99956	27.5583	0.385407	PF08212		KOG4824
Pp1s114_123V6	3.27575	1.71415	5.31762	-0.321096		321	90	1191	27	9.68501	3.28104	39.8809	0.800462	PF01208	PTHR21091	KOG2872			AT2G40490.1	HEME2	Uroporphyrinogen decarboxylase				Porphyrin and chlorophyll metabolism;Metabolic pathways;Biosynthesis of secondary metabolites	GO:0004853 uroporphyrinogen decarboxylase activity;GO:0004853 uroporphyrinogen decarboxylase activity;GO:0006779 porphyrin biosynthetic process;GO:0009941 chloroplast envelope;GO:0009570 chloroplast stroma;GO:0009507 chloroplast;GO:0009570 chloroplast stroma
Pp1s143_177V6	3.10414	2.1765	6.57742	-0.432127		285	124	2852	25	8.59884	4.52055	95.4998	0.741168	PF00111					AT1G60950.1	FED A	2Fe-2S ferredoxin-like superfamily protein				Photosynthesis	GO:0009055 electron carrier activity;GO:0051536 iron-sulfur cluster binding;GO:0051537 "2 iron, 2 sulfur cluster binding";GO:0005515 protein binding;GO:0009507 chloroplast;GO:0009767 photosynthetic electron transport chain;GO:0009416 response to light stimulus;GO:0009570 chloroplast stroma;GO:0009767 photosynthetic electron transport chain
Pp1s144_109V6	-1.35024	-0.022811	2.08835	-4.07598		13	27	127	2	0.392228	0.984313	4.25262	0.0592934						AT5G56780.1	ET2	effector of transcription2					GO:0003674 molecular_function;GO:0008150 biological_process
Pp1s15_152V6	0.375588	1.9088	4.69958	0.209419		43	103	776	39	1.29737	3.75497	25.9845	1.15622	PF00238	PTHR11761	KOG0901			AT3G04400.1	emb2171	Ribosomal protein L14p/L23e family protein				Ribosome	GO:0003735 structural constituent of ribosome;GO:0003735 structural constituent of ribosome;GO:0003735 structural constituent of ribosome;GO:0005840 ribosome;GO:0006412 translation;GO:0009793 embryo development ending in seed dormancy;GO:0022625 cytosolic large ribosomal subunit
Pp1s152_65V6	1.67724	4.70813	6.89164	2.99011		106	717	3546	268	3.19816	26.139	118.738	7.94532
Pp1s174_98V6	-0.880751	1.39223	3.68463	-0.616552		18	72	384	22	0.543085	2.62483	12.8583	0.652228						AT3G03341.1
Pp1s180_12V6	-0.0506763	-0.970344	2.30912	-4.07598		32	14	148	2	0.965484	0.510385	4.95581	0.0592934	PF03214					AT5G15650.1	RGP2	reversibly glycosylated polypeptide 2					GO:0022626 cytosolic ribosome;GO:0005618 cell wall;GO:0046686 response to cadmium ion;GO:0009651 response to salt stress;GO:0005829 cytosol;GO:0008152 metabolic process;GO:0033356 UDP-L-arabinose metabolic process;GO:0052691 UDP-arabinopyranose mutase activity;GO:0016020 membrane
Pp1s19_276V6	3.12425	2.63169	6.49359	-1.07598		289	170	2691	16	8.71952	6.19753	90.1086	0.474348	PF02507				K02694	AT1G31330.1	PSAF	photosystem I subunit F				Photosynthesis;Metabolic pathways	GO:0003674 molecular_function;GO:0009538 photosystem I reaction center;GO:0015979 photosynthesis;GO:0015979 photosynthesis;GO:0009941 chloroplast envelope;GO:0009535 chloroplast thylakoid membrane;GO:0009507 chloroplast;GO:0009535 chloroplast thylakoid membrane;GO:0009535 chloroplast thylakoid membrane;GO:0010287 plastoglobule;GO:0010287 plastoglobule;GO:0016020 membrane;GO:0009507 chloroplast;GO…
Pp1s195_8V6	0.197251	0.309764	2.25954	-0.491021		38	34	143	24	1.14651	1.23951	4.78838	0.711521	PF01370,PF07993	PTHR10366	KOG0747	4.2.1.76	K12450	AT1G78570.1	RHM1	rhamnose biosynthesis 1				Amino sugar and nucleotide sugar metabolism	GO:0003824 catalytic activity;GO:0009225 nucleotide-sugar metabolic process;GO:0010253 UDP-rhamnose biosynthetic process;GO:0050377 "UDP-glucose 4,6-dehydratase activity";GO:0005625 soluble fraction;GO:0010253 UDP-rhamnose biosynthetic process;GO:0010280 UDP-L-rhamnose synthase activity;GO:0010315 auxin efflux;GO:0051555 flavonol biosynthetic process;GO:0005829 cytosol
Pp1s196_120V6	1.11925	0.745863	4.00355	-0.616552		72	46	479	22	2.17234	1.67698	16.0394	0.652228	PF00494		KOG1459	2.5.1.32	K02291	AT5G17230.1	PSY	PHYTOENE SYNTHASE				Carotenoid biosynthesis;Metabolic pathways;Biosynthesis of secondary metabolites	GO:0016117 carotenoid biosynthetic process;GO:0016767 geranylgeranyl-diphosphate geranylgeranyltransferase activity;GO:0046905 phytoene synthase activity;GO:0009507 chloroplast;GO:0009507 chloroplast;GO:0016767 geranylgeranyl-diphosphate geranylgeranyltransferase activity
Pp1s196_122V6	1.05785	-1.07726	3.85789	-2.75406		69	13	433	5	2.08182	0.473928	14.4991	0.148234	PF00573	PTHR10746	KOG1624			AT1G07320.1	RPL4	ribosomal protein L4					GO:0003735 structural constituent of ribosome;GO:0005840 ribosome;GO:0006412 translation;GO:0009579 thylakoid;GO:0009579 thylakoid;GO:0005634 nucleus;GO:0005634 nucleus;GO:0009507 chloroplast;GO:0009507 chloroplast;GO:0009535 chloroplast thylakoid membrane;GO:0009535 chloroplast thylakoid membrane;GO:0009535 chloroplast thylakoid membrane;GO:0022626 cytosolic ribosome;GO:0022626 cytosolic ribosom…
Pp1s197_89V6	-1.24332	0.0296564	2.30912	-3.32193		14	28	148	0	0.422399	1.02077	4.95581	0	PF09685					AT1G04940.1	TIC20	translocon at the inner envelope membrane of chloroplasts 20					GO:0016020 membrane;GO:0045037 protein import into chloroplast stroma
Pp1s199_101V6	-0.527114	0.977189	3.26457	-1.16909		23	54	287	15	0.693941	1.96863	9.61025	0.444701	PF02878,PF02879,PF02880,PF00408	PTHR22573	KOG0625	5.4.2.2	K01835	AT5G51820.1	PGM	phosphoglucomutase				Glycolysis / Gluconeogenesis;Pentose phosphate pathway;Galactose metabolism;Purine metabolism;Starch and sucrose metabolism;Amino sugar and nucleotide sugar metabolism;Metabolic pathways;Biosynthesis of secondary metabolites	GO:0005829 cytosol;GO:0005992 trehalose biosynthetic process;GO:0006874 cellular calcium ion homeostasis;GO:0019255 glucose 1-phosphate metabolic process;GO:0019388 galactose catabolic process;GO:0004614 phosphoglucomutase activity;GO:0019252 starch biosynthetic process;GO:0004614 phosphoglucomutase activity;GO:0009570 chloroplast stroma;GO:0019252 starch biosynthetic process;GO:0009941 chloropla…
Pp1s223_13V6	0.503913	0.392227	2.43952	-2.75406		47	36	162	5	1.41805	1.31242	5.4246	0.148234	PF07386					AT3G60810.1							GO:0003674 molecular_function;GO:0003674 molecular_function;GO:0005575 cellular_component;GO:0008150 biological_process
Pp1s241_102V6	-0.243321	1.76146	6.98193	-0.616552		28	93	3775	22	0.844798	3.39041	126.407	0.652228	PF01738	PTHR17630	KOG3043			AT3G23570.1		alpha/beta-Hydrolases superfamily protein					GO:0016787 hydrolase activity;GO:0016787 hydrolase activity;GO:0005829 cytosol
Pp1s242_42V6	-0.591245	-0.777698	4.67142	-2.75406		22	16	761	5	0.66377	0.583297	25.4822	0.148234	PF04839					AT1G68590.1		Ribosomal protein PSRP-3/Ycf65					GO:0003735 structural constituent of ribosome;GO:0003735 structural constituent of ribosome;GO:0003735 structural constituent of ribosome;GO:0006412 translation;GO:0006412 translation;GO:0009535 chloroplast thylakoid membrane;GO:0009579 thylakoid;GO:0009507 chloroplast;GO:0009507 chloroplast;GO:0009507 chloroplast
Pp1s246_53V6	3.58232	3.12317	7.00242	1.33341		397	239	3829	85	11.978	8.71299	128.215	2.51997	PF03330,PF01357					AT5G02260.1	EXPA9	expansin A9					GO:0009826 unidimensional cell growth;GO:0009828 plant-type cell wall loosening;GO:0009831 plant-type cell wall modification involved in multidimensional cell growth;GO:0009826 unidimensional cell growth;GO:0009828 plant-type cell wall loosening;GO:0009507 chloroplast
Pp1s251_59V6	-4.05068	-0.870808	4.94672	-3.32193		2	15	921	0	0.0603427	0.546841	30.8399	0	PF03330,PF01357					AT4G28250.1	EXPB3	expansin B3					GO:0005576 extracellular region;GO:0005576 extracellular region;GO:0009664 plant-type cell wall organization;GO:0009826 unidimensional cell growth;GO:0009828 plant-type cell wall loosening;GO:0012505 endomembrane system;GO:0012505 endomembrane system;GO:0009826 unidimensional cell growth;GO:0009828 plant-type cell wall loosening;GO:0006949 syncytium formation
Pp1s252_90V6	1.37559	1.43175	4.43729	0.281568		86	74	647	41	2.59474	2.69775	21.6649	1.21552	PF00091,PF03953	PTHR11588	KOG1375		K07375	AT5G23860.2	TUB8	tubulin beta 8				Phagosome	GO:0005200 structural constituent of cytoskeleton;GO:0007017 microtubule-based process;GO:0045298 tubulin complex;GO:0016020 membrane;GO:0009651 response to salt stress;GO:0005515 protein binding
Pp1s3_533V6	-0.295789	-0.0772588	2.55088	-1.49102		27	26	175	12	0.814627	0.947857	5.85991	0.355761	PF04043					AT5G53370.1	PMEPCRF	pectin methylesterase PCR fragment F					GO:0005618 cell wall;GO:0042545 cell wall modification;GO:0030599 pectinesterase activity
Pp1s3_572V6	1.2531	1.43175	3.65041	-1.75406		79	74	375	10	2.38354	2.69775	12.5569	0.296467	PF00389,PF02826	PTHR10996	KOG0069			AT1G68010.1	HPR	hydroxypyruvate reductase					GO:0005777 peroxisome;GO:0008465 glycerate dehydrogenase activity;GO:0008266 poly(U) RNA binding;GO:0005777 peroxisome;GO:0005777 peroxisome;GO:0009507 chloroplast;GO:0048046 apoplast;GO:0005777 peroxisome;GO:0009853 photorespiration
Pp1s304_40V6	0.730683	0.54423	2.90702	-1.16909		55	40	224	15	1.65943	1.45824	7.50068	0.444701						AT5G15710.1		Galactose oxidase/kelch repeat superfamily protein					GO:0003674 molecular_function;GO:0008150 biological_process
Pp1s307_6V6	-0.143786	-2.19274	2.72172	-4.07598		30	6	197	2	0.905141	0.218736	6.59658	0.0592934		PTHR10366	KOG1429	1.1.1.-,5.1.3.-	K12451	AT1G63000.1	NRS/ER	nucleotide-rhamnose synthase/epimerase-reductase				Amino sugar and nucleotide sugar metabolism	GO:0008830 "dTDP-4-dehydrorhamnose 3,5-epimerase activity";GO:0008831 dTDP-4-dehydrorhamnose reductase activity;GO:0019305 dTDP-rhamnose biosynthetic process;GO:0005625 soluble fraction;GO:0010253 UDP-rhamnose biosynthetic process;GO:0010489 "UDP-4-keto-6-deoxy-glucose-3,5-epimerase activity";GO:0010490 UDP-4-keto-rhamnose-4-keto-reductase activity;GO:0005886 plasma membrane;GO:0005829 cytosol
Pp1s309_65V6	0.441177	0.351585	4.15224	-2.26863		45	35	531	7	1.35771	1.27596	17.7806	0.207527	PF00933,PF01915					AT5G20950.2		Glycosyl hydrolase family protein					GO:0004553 "hydrolase activity, hydrolyzing O-glycosyl compounds";GO:0004553 "hydrolase activity, hydrolyzing O-glycosyl compounds";GO:0004553 "hydrolase activity, hydrolyzing O-glycosyl compounds";GO:0005975 carbohydrate metabolic process;GO:0005975 carbohydrate metabolic process;GO:0005975 carbohydrate metabolic process;GO:0005618 cell wall;GO:0005618 cell wall;GO:0005618 cell wall;GO:0005618 c…
Pp1s310_62V6	0.441177	1.00366	3.4261	0.281568		45	55	321	41	1.35771	2.00508	10.7487	1.21552	PF02519				K14488	AT3G43120.1		SAUR-like auxin-responsive protein family				Plant hormone signal transduction	GO:0009733 response to auxin stimulus;GO:0005516 calmodulin binding;GO:0005516 calmodulin binding
Pp1s323_51V6	1.30688	0.579854	5.65234	-2.49102		82	41	1502	6	2.47405	1.4947	50.2948	0.17788	PF00903	PTHR10374	KOG2944			AT1G15380.1		Lactoylglutathione lyase / glyoxalase I family protein					GO:0004462 lactoylglutathione lyase activity;GO:0005975 carbohydrate metabolic process
Pp1s34_26V6	-2.05068	0.266696	2.29934	-1.26863		8	33	147	14	0.241371	1.20305	4.92232	0.415054	PF03966					AT4G35905.1							GO:0003674 molecular_function;GO:0005575 cellular_component;GO:0008150 biological_process
Pp1s345_25V6	5.30797	5.51807	7.62714	2.85475		1313	1257	5904	244	39.615	45.8252	197.697	7.2338	PF02507				K02694	AT1G31330.1	PSAF	photosystem I subunit F				Photosynthesis;Metabolic pathways	GO:0003674 molecular_function;GO:0009538 photosystem I reaction center;GO:0015979 photosynthesis;GO:0015979 photosynthesis;GO:0009941 chloroplast envelope;GO:0009535 chloroplast thylakoid membrane;GO:0009507 chloroplast;GO:0009535 chloroplast thylakoid membrane;GO:0009535 chloroplast thylakoid membrane;GO:0010287 plastoglobule;GO:0010287 plastoglobule;GO:0016020 membrane;GO:0009507 chloroplast;GO…
Pp1s352_14V6	2.73723	-0.254137	6.01704	-1.90606		221	23	1934	9	6.66787	0.838489	64.7604	0.266821	PF00101			4.1.1.39	K01602	AT5G38410.1		Ribulose bisphosphate carboxylase (small chain) family protein				Glyoxylate and dicarboxylate metabolism;Carbon fixation in photosynthetic organisms;Metabolic pathways	GO:0009573 chloroplast ribulose bisphosphate carboxylase complex;GO:0015977 carbon fixation;GO:0016984 ribulose-bisphosphate carboxylase activity;GO:0016984 ribulose-bisphosphate carboxylase activity;GO:0016984 ribulose-bisphosphate carboxylase activity;GO:0016984 ribulose-bisphosphate carboxylase activity;GO:0005515 protein binding;GO:0009507 chloroplast;GO:0005618 cell wall;GO:0005618 cell wall…
Pp1s376_32V6	-1.59124	0.176498	4.38044	-1.37554		11	31	622	13	0.331885	1.13014	20.8278	0.385407	PF00584	PTHR12309	KOG3498			AT5G50460.1		secE/sec61-gamma protein transport protein				Protein export;Protein processing in endoplasmic reticulum;Phagosome	GO:0006605 protein targeting;GO:0006605 protein targeting;GO:0006886 intracellular protein transport;GO:0006886 intracellular protein transport;GO:0015031 protein transport;GO:0015450 P-P-bond-hydrolysis-driven protein transmembrane transporter activity
Pp1s378_41V6	1.17814	-0.192736	3.39429	-2.49102		75	24	314	6	2.26285	0.874945	10.5143	0.17788	PF00004		KOG0651			AT1G73110.1		P-loop containing nucleoside triphosphate hydrolases superfamily protein					GO:0005524 ATP binding;GO:0016887 ATPase activity;GO:0009507 chloroplast;GO:0009535 chloroplast thylakoid membrane;GO:0009535 chloroplast thylakoid membrane;GO:0009507 chloroplast
Pp1s386_41V6	-1.59124	0.0802825	3.68838	-2.07598		11	29	385	8	0.331885	1.05723	12.8918	0.237174	PF12138
Pp1s4_321V6	3.51918	4.20814	7.41708	3.06357		380	507	5104	282	11.4651	18.4832	170.908	8.36038	PF02531				K02692	AT1G03130.1	PSAD-2	photosystem I subunit D-2				Photosynthesis;Metabolic pathways	GO:0003674 molecular_function;GO:0009538 photosystem I reaction center;GO:0015979 photosynthesis;GO:0015979 photosynthesis;GO:0009579 thylakoid;GO:0009941 chloroplast envelope;GO:0009535 chloroplast thylakoid membrane;GO:0009507 chloroplast;GO:0009535 chloroplast thylakoid membrane;GO:0009535 chloroplast thylakoid membrane;GO:0016020 membrane;GO:0009579 thylakoid
Pp1s400_20V6	6.20435	6.42504	8.52528	5.69716		2444	2357	11003	1750	73.7388	85.9269	368.438	51.8818	PF00828	PTHR11721	KOG1742		K02900	AT1G70600.1		Ribosomal protein L18e/L15 superfamily protein				Ribosome	GO:0003735 structural constituent of ribosome;GO:0003735 structural constituent of ribosome;GO:0005840 ribosome;GO:0006412 translation;GO:0006412 translation;GO:0022626 cytosolic ribosome;GO:0016020 membrane;GO:0022625 cytosolic large ribosomal subunit;GO:0005829 cytosol
Pp1s43_126V6	-0.527114	-0.45577	3.10529	-1.90606		23	20	257	9	0.693941	0.729121	8.60569	0.266821	PF09366					AT5G04440.1		Protein of unknown function (DUF1997)					GO:0003674 molecular_function;GO:0008150 biological_process;GO:0009507 chloroplast
Pp1s540_7V6	2.30688	2.25572	4.81906	0.316334		164	131	843	42	4.9481	4.77574	28.228	1.24516	PF00155	PTHR11879	KOG1411	2.6.1.1	K00813	AT4G31990.1	ASP5	aspartate aminotransferase 5				Alanine, aspartate and glutamate metabolism;Cysteine and methionine metabolism;Arginine and proline metabolism;Tyrosine metabolism;Phenylalanine metabolism;Phenylalanine, tyrosine and tryptophan biosynthesis;Carbon fixation in photosynthetic organisms;Isoquinoline alkaloid biosynthesis;Tropane, piperidine and pyridine alkaloid biosynthesis;Metabolic pathways;Biosynthesis of secondary metabolites	GO:0009941 chloroplast envelope;GO:0009941 chloroplast envelope;GO:0009507 chloroplast;GO:0009507 chloroplast;GO:0009570 chloroplast stroma;GO:0046686 response to cadmium ion;GO:0046686 response to cadmium ion;GO:0046686 response to cadmium ion;GO:0009409 response to cold;GO:0010319 stromule;GO:0009507 chloroplast;GO:0009507 chloroplast;GO:0009507 chloroplast;GO:0048046 apoplast;GO:0048046 apopla…
Pp1s55_113V6	-1.35024	-0.254137	2.14406	-3.32193		13	23	132	0	0.392228	0.838489	4.42004	0
Pp1s55_275V6	0.119249	-0.970344	3.93572	-2.07598		36	14	457	8	1.08617	0.510385	15.3027	0.237174	PF00108,PF02803	PTHR18919	KOG1389	2.3.1.16	K07513	AT2G33150.1	PKT3	peroxisomal 3-ketoacyl-CoA thiolase 3				Fatty acid metabolism;Valine, leucine and isoleucine degradation;Biosynthesis of unsaturated fatty acids;Metabolic pathways;Biosynthesis of secondary metabolites;Peroxisome	GO:0019395 fatty acid oxidation;GO:0003988 acetyl-CoA C-acyltransferase activity;GO:0003988 acetyl-CoA C-acyltransferase activity;GO:0009611 response to wounding;GO:0009695 jasmonic acid biosynthetic process;GO:0005739 mitochondrion;GO:0005739 mitochondrion;GO:0009507 chloroplast;GO:0005730 nucleolus;GO:0005774 vacuolar membrane;GO:0016020 membrane;GO:0005777 peroxisome;GO:0005777 peroxisome;GO:0…
Pp1s58_59V6	-0.465714	0.392227	2.49198	-1.75406		24	36	168	10	0.724113	1.31242	5.62551	0.296467	PF00036	PTHR12294	KOG2643			AT4G32060.1		calcium-binding EF hand family protein					GO:0005509 calcium ion binding;GO:0005509 calcium ion binding;GO:0005509 calcium ion binding
Pp1s64_52V6	0.831967	0.77689	3.14406	-0.169093		59	47	264	30	1.78011	1.71343	8.84009	0.889402
Pp1s66_190V6	-0.591245	-0.529771	1.91985	-0.988521		22	19	113	17	0.66377	0.692665	3.78383	0.503994	PF01588	PTHR11946	KOG2241			AT2G40660.1		Nucleic acid-binding, OB-fold-like protein					GO:0000049 tRNA binding;GO:0000049 tRNA binding;GO:0005829 cytosol
Pp1s66_48V6	2.08887	-3.32193	5.64656	-4.07598		141	0	1496	2	4.25416	0	50.0938	0.0592934	PF00101			4.1.1.39	K01602	AT1G67090.1	RBCS1A	ribulose bisphosphate carboxylase small chain 1A				Glyoxylate and dicarboxylate metabolism;Carbon fixation in photosynthetic organisms;Metabolic pathways	GO:0009573 chloroplast ribulose bisphosphate carboxylase complex;GO:0015977 carbon fixation;GO:0016984 ribulose-bisphosphate carboxylase activity;GO:0031977 thylakoid lumen;GO:0009579 thylakoid;GO:0009579 thylakoid;GO:0009941 chloroplast envelope;GO:0009941 chloroplast envelope;GO:0009409 response to cold;GO:0009507 chloroplast;GO:0009535 chloroplast thylakoid membrane;GO:0009535 chloroplast thyl…
Pp1s67_243V6	1.21611	0.0802825	4.26708	-1.07598		77	29	575	16	2.3232	1.05723	19.254	0.474348	PF03321					AT4G03400.1	DFL2	Auxin-responsive GH3 family protein				Plant hormone signal transduction	GO:0009733 response to auxin stimulus;GO:0009416 response to light stimulus;GO:0009733 response to auxin stimulus;GO:0009507 chloroplast
Pp1s79_181V6	1.32436	1.24467	3.25954	-1.07598		83	65	286	16	2.50422	2.36964	9.57676	0.474348	PF02629,PF00549	PTHR11117	KOG1255	6.2.1.4,6.2.1.5	K01899	AT5G23250.1		Succinyl-CoA ligase, alpha subunit				Citrate cycle (TCA cycle);Propanoate metabolism;Metabolic pathways;Biosynthesis of secondary metabolites	GO:0004776 succinate-CoA ligase (GDP-forming) activity;GO:0008152 metabolic process;GO:0008152 metabolic process;GO:0008152 metabolic process;GO:0005739 mitochondrion;GO:0005739 mitochondrion;GO:0005507 copper ion binding
Pp1s81_143V6	3.74374	2.91579	6.09048	2.08389		444	207	2035	143	13.3961	7.5464	68.1424	4.23948
Pp1s83_167V6	-0.0506763	-1.60777	2.55088	-3.32193		32	9	175	0	0.965484	0.328104	5.85991	0	PF02298					AT5G26330.1		Cupredoxin superfamily protein					GO:0005507 copper ion binding;GO:0005507 copper ion binding;GO:0009055 electron carrier activity;GO:0031225 anchored to membrane;GO:0031225 anchored to membrane
Pp1s83_246V6	5.47289	3.02966	7.84303	1.2278		1472	224	6857	79	44.4122	8.16615	229.608	2.34209	PF01241				K08905	AT1G55670.1	PSAG	photosystem I subunit G				Photosynthesis;Metabolic pathways	GO:0003674 molecular_function;GO:0009522 photosystem I;GO:0015979 photosynthesis;GO:0016020 membrane;GO:0009773 photosynthetic electron transport in photosystem I;GO:0015979 photosynthesis;GO:0050821 protein stabilization;GO:0009941 chloroplast envelope;GO:0009941 chloroplast envelope;GO:0009535 chloroplast thylakoid membrane;GO:0009507 chloroplast;GO:0009535 chloroplast thylakoid membrane;GO:000…
Pp1s84_180V6	-1.88075	-0.45577	2.72172	-1.49102		9	20	197	12	0.271542	0.729121	6.59658	0.355761	PF00071,PF08477	PTHR11708	KOG0087		K07976	AT1G07410.1	RABA2b	RAB GTPase homolog A2B					GO:0003924 GTPase activity;GO:0005525 GTP binding;GO:0005525 GTP binding;GO:0006886 intracellular protein transport;GO:0006913 nucleocytoplasmic transport;GO:0007165 signal transduction;GO:0007264 small GTPase mediated signal transduction;GO:0015031 protein transport;GO:0005886 plasma membrane;GO:0005768 endosome;GO:0009504 cell plate
Pp1s85_2V6	-4.05068	-1.07726	2.90702	-4.07598		2	13	224	2	0.0603427	0.473928	7.50068	0.0592934	PF08263,PF00560	PTHR23258	KOG4579			AT1G17230.1		Leucine-rich receptor-like protein kinase family protein					GO:0004672 protein kinase activity;GO:0004672 protein kinase activity;GO:0004674 protein serine/threonine kinase activity;GO:0005524 ATP binding;GO:0006468 protein phosphorylation;GO:0012505 endomembrane system
Pp1s89_23V6	2.04736	0.392227	4.21601	-3.49102		137	36	555	3	4.13348	1.31242	18.5843	0.0889402	PF00831		KOG3436			AT5G65220.1		Ribosomal L29 family protein					GO:0003735 structural constituent of ribosome;GO:0003735 structural constituent of ribosome;GO:0005840 ribosome;GO:0006412 translation;GO:0006412 translation;GO:0042254 ribosome biogenesis;GO:0009941 chloroplast envelope;GO:0009507 chloroplast;GO:0009295 nucleoid;GO:0009507 chloroplast;GO:0009570 chloroplast stroma
Pp1s1_461V6	3.95495	0.0802825	6.95531	-0.754055		514	29	3706	20	15.5081	1.05723	124.096	0.592934	PF05757					AT4G21280.1	PSBQA	photosystem II subunit QA				Photosynthesis;Metabolic pathways	GO:0005509 calcium ion binding;GO:0005509 calcium ion binding;GO:0009654 oxygen evolving complex;GO:0030095 chloroplast photosystem II;GO:0009543 chloroplast thylakoid lumen;GO:0031977 thylakoid lumen;GO:0009543 chloroplast thylakoid lumen;GO:0009579 thylakoid;GO:0009535 chloroplast thylakoid membrane;GO:0009579 thylakoid;GO:0009507 chloroplast;GO:0009535 chloroplast thylakoid membrane;GO:0009535…
Pp1s114_151V6	1.37559	1.19958	3.30424	0.281568		86	63	295	41	2.59474	2.29673	9.87813	1.21552	PF00249					AT1G32240.1	KAN2	Homeodomain-like superfamily protein					GO:0003677 DNA binding;GO:0003700 sequence-specific DNA binding transcription factor activity;GO:0006355 "regulation of transcription, DNA-dependent";GO:0048440 carpel development;GO:0048481 ovule development;GO:0009944 polarity specification of adaxial/abaxial axis
Pp1s115_153V6	-0.243321	-2.19274	2.51752	-3.32193		28	6	171	0	0.844798	0.218736	5.72597	0	PF03767					AT4G29260.1		HAD superfamily, subfamily IIIB acid phosphatase					GO:0003993 acid phosphatase activity;GO:0003993 acid phosphatase activity;GO:0008150 biological_process;GO:0005773 vacuole;GO:0005774 vacuolar membrane;GO:0005829 cytosol
Pp1s118_76V6	2.33303	2.29912	4.26959	1.44758		167	135	576	92	5.03862	4.92156	19.2875	2.7275	PF00137	PTHR10263	KOG0233	3.6.3.14	K03661	AT4G32530.1		ATPase, F0/V0 complex, subunit C protein				Oxidative phosphorylation;Metabolic pathways;Phagosome	GO:0015986 ATP synthesis coupled proton transport;GO:0015986 ATP synthesis coupled proton transport;GO:0016887 ATPase activity;GO:0005773 vacuole;GO:0005515 protein binding
Pp1s121_54V6	0.704211	0.714155	4.75966	-0.375544		54	45	809	26	1.62925	1.64052	27.0895	0.770815	PF02507				K02694	AT1G31330.1	PSAF	photosystem I subunit F				Photosynthesis;Metabolic pathways	GO:0003674 molecular_function;GO:0009538 photosystem I reaction center;GO:0015979 photosynthesis;GO:0015979 photosynthesis;GO:0009941 chloroplast envelope;GO:0009535 chloroplast thylakoid membrane;GO:0009507 chloroplast;GO:0009535 chloroplast thylakoid membrane;GO:0009535 chloroplast thylakoid membrane;GO:0010287 plastoglobule;GO:0010287 plastoglobule;GO:0016020 membrane;GO:0009507 chloroplast;GO…
Pp1s130_287V6	-0.143786	-1.45577	2.22895	-3.07598		30	10	140	4	0.905141	0.36456	4.68793	0.118587	PF00481	PTHR13832	KOG0698			AT5G24940.1		Protein phosphatase 2C family protein					GO:0003824 catalytic activity;GO:0004722 protein serine/threonine phosphatase activity;GO:0004722 protein serine/threonine phosphatase activity;GO:0006470 protein dephosphorylation
Pp1s131_116V6	0.782214	-0.133842	4.7272	-0.754055		57	25	791	20	1.71977	0.911401	26.4868	0.592934	PF00564,PF07714,PF00069	PTHR23257	KOG0192			AT5G57610.1		Protein kinase superfamily protein with octicosapeptide/Phox/Bem1p domain					GO:0004672 protein kinase activity;GO:0006468 protein phosphorylation;GO:0006468 protein phosphorylation;GO:0004712 protein serine/threonine/tyrosine kinase activity
Pp1s131_195V6	-0.0506763	-0.607773	3.07695	-0.906058		32	18	252	18	0.965484	0.656209	8.43827	0.533641				1.6.5.3,1.6.99.3	K03966	AT3G18410.2		Complex I subunit NDUFS6				Oxidative phosphorylation;Metabolic pathways	GO:0003674 molecular_function;GO:0005739 mitochondrion;GO:0005739 mitochondrion;GO:0009853 photorespiration;GO:0031966 mitochondrial membrane;GO:0045271 respiratory chain complex I;GO:0005747 mitochondrial respiratory chain complex I;GO:0005747 mitochondrial respiratory chain complex I
Pp1s132_52V6	0.564034	0.0802825	2.90057	-0.375544		49	29	223	26	1.4784	1.05723	7.4672	0.770815	PF01593	PTHR10668				AT4G14210.1	PDS3	phytoene desaturase 3				Carotenoid biosynthesis;Metabolic pathways;Biosynthesis of secondary metabolites	GO:0009941 chloroplast envelope;GO:0009507 chloroplast;GO:0009507 chloroplast;GO:0009507 chloroplast;GO:0009507 chloroplast;GO:0016117 carotenoid biosynthetic process;GO:0016120 carotene biosynthetic process;GO:0016166 phytoene dehydrogenase activity
Pp1s136_9V6	-0.880751	0.392227	2.47471	-0.375544		18	36	166	26	0.543085	1.31242	5.55854	0.770815	PF02151,PF08755					AT2G03390.1		uvrB/uvrC motif-containing protein					GO:0003677 DNA binding;GO:0003677 DNA binding;GO:0003677 DNA binding;GO:0004518 nuclease activity;GO:0004518 nuclease activity;GO:0004518 nuclease activity;GO:0006289 nucleotide-excision repair;GO:0006289 nucleotide-excision repair;GO:0006289 nucleotide-excision repair;GO:0009507 chloroplast
Pp1s142_143V6	-0.143786	-1.60777	2.26959	-3.32193		30	9	144	0	0.905141	0.328104	4.82187	0	PF01554	PTHR11206	KOG1347			AT2G21340.1		MATE efflux family protein					GO:0006855 drug transmembrane transport;GO:0006855 drug transmembrane transport;GO:0015238 drug transmembrane transporter activity;GO:0015238 drug transmembrane transporter activity;GO:0015297 antiporter activity;GO:0015297 antiporter activity;GO:0055085 transmembrane transport;GO:0055085 transmembrane transport;GO:0009507 chloroplast;GO:0009507 chloroplast
Pp1s144_137V6	3.18773	3.29376	5.33329	2.95192		302	269	1204	261	9.11175	9.80667	40.3162	7.73779
Pp1s156_150V6	-0.295789	-0.192736	2.35705	-0.616552		27	24	153	22	0.814627	0.874945	5.12323	0.652228	PF01225,PF08245,PF02875	PTHR23135				AT1G63680.1	MURE	acid-amino acid ligases;ligases;ATP binding;ATP binding;ligases					GO:0005524 ATP binding;GO:0005524 ATP binding;GO:0009058 biosynthetic process;GO:0016874 ligase activity;GO:0016874 ligase activity;GO:0016881 acid-amino acid ligase activity;GO:0009295 nucleoid;GO:0009507 chloroplast;GO:0009658 chloroplast organization;GO:0010020 chloroplast fission
Pp1s16_274V6	0.704211	0.807264	3.45722	-0.121787		54	48	328	31	1.62925	1.74989	10.9831	0.919048						AT2G05620.1	PGR5	proton gradient regulation 5					GO:0009055 electron carrier activity;GO:0009534 chloroplast thylakoid;GO:0009773 photosynthetic electron transport in photosystem I;GO:0009535 chloroplast thylakoid membrane;GO:0009773 photosynthetic electron transport in photosystem I;GO:0009507 chloroplast;GO:0009414 response to water deprivation;GO:0009644 response to high light intensity
Pp1s162_22V6	0.472886	1.02966	3.8445	0.596442		46	56	429	51	1.38788	2.04154	14.3651	1.51198	PF00999		KOG1650			AT5G41610.1	CHX18	cation/H+ exchanger 18					GO:0015385 sodium:hydrogen antiporter activity;GO:0016021 integral to membrane;GO:0016021 integral to membrane;GO:0005451 monovalent cation:hydrogen antiporter activity;GO:0006812 cation transport
Pp1s164_65V6	-0.728748	-0.970344	2.34759	-1.90606		20	14	152	9	0.603427	0.510385	5.08975	0.266821	PF08446,PF01590,PF00360,PF00989,PF08448,PF00512,PF02518	PTHR23283			K12121	AT2G18790.1	PHYB	phytochrome B				Circadian rhythm - plant	GO:0004673 protein histidine kinase activity;GO:0004871 signal transducer activity;GO:0006355 "regulation of transcription, DNA-dependent";GO:0008020 G-protein coupled photoreceptor activity;GO:0005634 nucleus;GO:0005515 protein binding;GO:0005515 protein binding;GO:0005515 protein binding;GO:0005515 protein binding;GO:0005515 protein binding;GO:0005515 protein binding;GO:0009409 response to cold…
Pp1s166_100V6	2.56403	2.1765	5.32487	1.65194		196	124	1197	106	5.91359	4.52055	40.0818	3.14255	PF06983
Pp1s169_68V6	3.02614	3.78454	5.93729	3.27274		270	378	1830	326	8.14627	13.7804	61.2779	9.66483	PF03219				K03301	AT1G80300.1	NTT1	nucleotide transporter 1					GO:0005471 ATP:ADP antiporter activity;GO:0006810 transport;GO:0009941 chloroplast envelope;GO:0016020 membrane;GO:0005515 protein binding
Pp1s177_14V6	0.704211	-3.32193	2.78617	-3.32193		54	0	206	0	1.62925	0	6.89795	0	PF00179	PTHR11621				AT3G20060.1	UBC19	ubiquitin-conjugating enzyme19				Ubiquitin mediated proteolysis	GO:0004842 ubiquitin-protein ligase activity;GO:0004842 ubiquitin-protein ligase activity;GO:0005634 nucleus;GO:0005737 cytoplasm;GO:0008283 cell proliferation;GO:0004842 ubiquitin-protein ligase activity;GO:0006511 ubiquitin-dependent protein catabolic process
Pp1s191_1V6	-0.591245	-1.45577	1.80011	-1.75406		22	10	104	10	0.66377	0.36456	3.48246	0.296467	PF02163					AT5G35220.1	EGY1	Peptidase M50 family protein					GO:0016020 membrane;GO:0004222 metalloendopeptidase activity;GO:0009416 response to light stimulus;GO:0009507 chloroplast;GO:0009630 gravitropism;GO:0009723 response to ethylene stimulus;GO:0009959 negative gravitropism;GO:0010027 thylakoid membrane organization;GO:0010207 photosystem II assembly;GO:0048564 photosystem I assembly;GO:0009658 chloroplast organization;GO:0009507 chloroplast
Pp1s195_100V6	3.58595	3.91579	7.01068	3.56426		398	414	3851	399	12.0082	15.0928	128.951	11.829
Pp1s197_85V6	-0.243321	-1.45577	2.06545	-2.26863		28	10	125	7	0.844798	0.36456	4.18565	0.207527	PF00403,PF00122,PF00702	PTHR11939	KOG0207			AT5G21930.1	PAA2	P-type ATPase of Arabidopsis 2					GO:0015662 "ATPase activity, coupled to transmembrane movement of ions, phosphorylative mechanism";GO:0005375 copper ion transmembrane transporter activity;GO:0006825 copper ion transport;GO:0009535 chloroplast thylakoid membrane
Pp1s20_130V6	0.649763	-0.45577	3.54261	-1.16909		52	20	348	15	1.56891	0.729121	11.6528	0.444701	PF07719,PF00515	PTHR22904				AT1G55480.1	ZKT	protein containing PDZ domain, a K-box domain, and a TPR region					GO:0005488 binding;GO:0009941 chloroplast envelope;GO:0009507 chloroplast;GO:0009535 chloroplast thylakoid membrane;GO:0009535 chloroplast thylakoid membrane;GO:0009611 response to wounding;GO:0009507 chloroplast;GO:0009570 chloroplast stroma
Pp1s20_391V6	-0.880751	-3.19274	2.36645	-4.07598		18	3	154	2	0.543085	0.109368	5.15672	0.0592934	PF05637		KOG4748			AT5G07720.1		Galactosyl transferase GMA12/MNN10 family protein					GO:0008150 biological_process;GO:0016021 integral to membrane;GO:0016740 transferase activity;GO:0016757 "transferase activity, transferring glycosyl groups";GO:0016757 "transferase activity, transferring glycosyl groups"
Pp1s206_20V6	-2.05068	-1.97034	2.04218	-3.32193		8	7	123	0	0.241371	0.255192	4.11868	0	PF05678
Pp1s212_44V6	3.52297	2.28839	5.94907	1.47861		381	134	1845	94	11.4953	4.88511	61.7802	2.78679	PF00310,PF04898,PF01645,PF01493	PTHR11938	KOG0399	1.4.7.1	K00284	AT5G04140.1	GLU1	glutamate synthase 1				Nitrogen metabolism	GO:0009941 chloroplast envelope;GO:0009941 chloroplast envelope;GO:0009507 chloroplast;GO:0009507 chloroplast;GO:0009416 response to light stimulus;GO:0009570 chloroplast stroma;GO:0016020 membrane;GO:0016020 membrane;GO:0009507 chloroplast;GO:0009507 chloroplast;GO:0048046 apoplast;GO:0048046 apoplast;GO:0009570 chloroplast stroma;GO:0005515 protein binding;GO:0005739 mitochondrion;GO:0009507 ch…
Pp1s221_23V6	0.649763	-3.32193	2.59152	-3.32193		52	0	180	0	1.56891	0	6.02733	0						AT5G02420.1							GO:0003674 molecular_function;GO:0005575 cellular_component;GO:0008150 biological_process
Pp1s23_229V6	-0.00628214	0.0802825	2.32849	-0.375544		33	29	150	26	0.995655	1.05723	5.02278	0.770815		PTHR18937	KOG0811			AT2G45260.1		Plant protein of unknown function (DUF641)					GO:0003674 molecular_function;GO:0008150 biological_process;GO:0005774 vacuolar membrane
Pp1s23_86V6	-1.14379	0.222302	3.26959	-0.683666		15	32	288	21	0.45257	1.16659	9.64373	0.622581						AT1G49410.1	TOM6	translocase of the outer mitochondrial membrane 6					GO:0003674 molecular_function;GO:0008150 biological_process;GO:0005739 mitochondrion
Pp1s232_82V6	-3.05068	-3.32193	2.51752	-4.07598		4	0	171	2	0.120685	0	5.72597	0.0592934	PF00861				K02881	AT1G48350.1		Ribosomal L18p/L5e family protein				Ribosome	GO:0003735 structural constituent of ribosome;GO:0003735 structural constituent of ribosome;GO:0005840 ribosome;GO:0006412 translation;GO:0006412 translation;GO:0042254 ribosome biogenesis;GO:0009941 chloroplast envelope;GO:0009507 chloroplast
Pp1s237_75V6	0.119249	-3.19274	3.04218	-3.32193		36	3	246	0	1.08617	0.109368	8.23736	0
Pp1s249_80V6	-0.350237	-3.32193	1.98231	-3.49102		26	0	118	3	0.784455	0	3.95125	0.0889402	PF00096,PF00847	PTHR23224:SF118				AT2G36450.1	HRD	Integrase-type DNA-binding superfamily protein					GO:0003677 DNA binding;GO:0003700 sequence-specific DNA binding transcription factor activity;GO:0005634 nucleus;GO:0006355 "regulation of transcription, DNA-dependent";GO:0045893 "positive regulation of transcription, DNA-dependent";GO:0003700 sequence-specific DNA binding transcription factor activity;GO:0050832 defense response to fungus
Pp1s269_10V6	2.29805	1.7301	4.99297	1.49387		163	91	951	95	4.91793	3.3175	31.8444	2.81644	PF00153	PTHR11896	KOG0749		K05863	AT4G28390.1	AAC3	ADP/ATP carrier 3					GO:0005471 ATP:ADP antiporter activity;GO:0005488 binding;GO:0005743 mitochondrial inner membrane;GO:0006810 transport;GO:0006839 mitochondrial transport;GO:0005471 ATP:ADP antiporter activity;GO:0015865 purine nucleotide transport;GO:0016020 membrane;GO:0009941 chloroplast envelope;GO:0005739 mitochondrion;GO:0016020 membrane
Pp1s280_21V6	-0.465714	-3.7777	2.765	-3.32193		24	2	203	0	0.724113	0.0729121	6.79749	0
Pp1s3_432V6	0.831967	0.714155	2.95142	0.281568		59	45	231	41	1.78011	1.64052	7.73508	1.21552	PF01150	PTHR11782	KOG1386			AT4G19180.1		GDA1/CD39 nucleoside phosphatase family protein					GO:0016787 hydrolase activity;GO:0016787 hydrolase activity
Pp1s318_24V6	1.07861	-0.870808	3.40345	-1.49102		70	15	316	12	2.112	0.546841	10.5813	0.355761	PF00676	PTHR11516	KOG0225	1.2.4.1	K00161	AT1G01090.1	PDH-E1 ALPHA	pyruvate dehydrogenase E1 alpha				Glycolysis / Gluconeogenesis;Citrate cycle (TCA cycle);Valine, leucine and isoleucine biosynthesis;Pyruvate metabolism;Butanoate metabolism;Metabolic pathways;Biosynthesis of secondary metabolites	GO:0004739 pyruvate dehydrogenase (acetyl-transferring) activity;GO:0006096 glycolysis;GO:0008152 metabolic process;GO:0008152 metabolic process;GO:0055114 oxidation-reduction process;GO:0009941 chloroplast envelope;GO:0009507 chloroplast;GO:0005829 cytosol;GO:0004739 pyruvate dehydrogenase (acetyl-transferring) activity;GO:0009536 plastid
Pp1s347_30V6	1.57868	0.507704	4.27209	-0.0759835		99	39	577	32	2.98697	1.42179	19.321	0.948695	PF00254	PTHR10516	KOG0552			AT5G45680.1	FKBP13	FK506-binding protein 13					GO:0003755 peptidyl-prolyl cis-trans isomerase activity;GO:0005528 FK506 binding;GO:0005528 FK506 binding;GO:0006457 protein folding;GO:0009543 chloroplast thylakoid lumen;GO:0016020 membrane;GO:0018208 peptidyl-proline modification;GO:0009543 chloroplast thylakoid lumen;GO:0031977 thylakoid lumen;GO:0009507 chloroplast;GO:0003755 peptidyl-prolyl cis-trans isomerase activity;GO:0005515 protein bi…
Pp1s348_22V6	2.32436	2.2223	4.56115	1.85475		166	128	705	122	5.00845	4.66637	23.6071	3.6169						AT2G42130.4		Plastid-lipid associated protein PAP / fibrillin family protein					GO:0005198 structural molecule activity;GO:0005198 structural molecule activity;GO:0005198 structural molecule activity;GO:0005198 structural molecule activity;GO:0005198 structural molecule activity;GO:0008150 biological_process;GO:0009579 thylakoid;GO:0009579 thylakoid;GO:0009579 thylakoid;GO:0009579 thylakoid;GO:0009579 thylakoid;GO:0010287 plastoglobule;GO:0010287 plastoglobule;GO:0010287 pla…
Pp1s374_42V6	-0.527114	-3.32193	4.6291	-4.07598		23	0	739	2	0.693941	0	24.7456	0.0592934	PF00101					AT5G38410.3		Ribulose bisphosphate carboxylase (small chain) family protein				Glyoxylate and dicarboxylate metabolism;Carbon fixation in photosynthetic organisms;Metabolic pathways	GO:0009573 chloroplast ribulose bisphosphate carboxylase complex;GO:0015977 carbon fixation;GO:0016984 ribulose-bisphosphate carboxylase activity;GO:0016984 ribulose-bisphosphate carboxylase activity;GO:0016984 ribulose-bisphosphate carboxylase activity;GO:0016984 ribulose-bisphosphate carboxylase activity;GO:0005515 protein binding;GO:0009507 chloroplast;GO:0005618 cell wall;GO:0005618 cell wall…
Pp1s379_37V6	-0.963213	-1.31827	2.41255	-1.90606		17	11	159	9	0.512913	0.401016	5.32414	0.266821		PTHR12504				AT5G43970.1	TOM22-V	translocase of outer membrane 22-V					GO:0005742 mitochondrial outer membrane translocase complex;GO:0006626 protein targeting to mitochondrion;GO:0015450 P-P-bond-hydrolysis-driven protein transmembrane transporter activity;GO:0005739 mitochondrion;GO:0005739 mitochondrion;GO:0009536 plastid;GO:0005774 vacuolar membrane
Pp1s385_3V6	-3.32193	-2.45577	5.65234	-3.32193		0	5	1502	0	0	0.18228	50.2948	0
Pp1s39_72V6	0.0786068	-0.529771	2.0304	-0.683666		35	19	122	21	1.056	0.692665	4.08519	0.622581	PF00106	PTHR19410	KOG1208			AT5G53090.1		NAD(P)-binding Rossmann-fold superfamily protein					GO:0003824 catalytic activity;GO:0005488 binding;GO:0005575 cellular_component;GO:0007275 multicellular organismal development;GO:0008152 metabolic process;GO:0016491 oxidoreductase activity;GO:0016491 oxidoreductase activity;GO:0055114 oxidation-reduction process
Pp1s395_10V6	-1.35024	-0.690236	2.41255	-1.26863		13	17	159	14	0.392228	0.619753	5.32414	0.415054	PF04570					AT1G78020.1		Protein of unknown function (DUF581)
Pp1s41_267V6	5.45811	1.9088	7.55191	1.50898		1457	103	5604	96	43.9597	3.75497	187.651	2.84609	PF02605				K02699	AT4G12800.1	PSAL	photosystem I subunit l				Photosynthesis;Metabolic pathways	GO:0003674 molecular_function;GO:0009538 photosystem I reaction center;GO:0015979 photosynthesis;GO:0019684 "photosynthesis, light reaction";GO:0009941 chloroplast envelope;GO:0009535 chloroplast thylakoid membrane;GO:0009507 chloroplast;GO:0009535 chloroplast thylakoid membrane;GO:0009535 chloroplast thylakoid membrane;GO:0010287 plastoglobule;GO:0016020 membrane;GO:0009507 chloroplast;GO:000957…
Pp1s44_58V6	2.34164	2.16482	4.45281	1.93524		168	123	654	129	5.06879	4.48409	21.8993	3.82443	PF00025,PF08477	PTHR11711	KOG0077			AT4G02080.1	SAR2	secretion-associated RAS super family 2					GO:0006886 intracellular protein transport;GO:0005525 GTP binding;GO:0005886 plasma membrane;GO:0005886 plasma membrane;GO:0005829 cytosol
Pp1s452_10V6	-1.59124	-2.7777	3.50481	-3.32193		11	4	339	0	0.331885	0.145824	11.3515	0	PF02325				K02221	AT5G21920.1	YLMG2	YGGT family protein					GO:0003674 molecular_function;GO:0008150 biological_process;GO:0009507 chloroplast;GO:0009507 chloroplast;GO:0016020 membrane;GO:0016020 membrane
Pp1s466_14V6	-0.880751	-3.32193	2.90702	-3.32193		18	0	224	0	0.543085	0	7.50068	0	PF03330,PF01357					AT1G69530.1	EXPA1	expansin A1					GO:0009826 unidimensional cell growth;GO:0009828 plant-type cell wall loosening;GO:0009826 unidimensional cell growth;GO:0009828 plant-type cell wall loosening;GO:0009505 plant-type cell wall;GO:0006949 syncytium formation;GO:0009739 response to gibberellin stimulus;GO:0010114 response to red light;GO:0010119 regulation of stomatal movement
Pp1s66_193V6	-0.728748	-0.529771	2.24941	-0.828056		20	19	142	19	0.603427	0.692665	4.7549	0.563288	PF00481	PTHR13832	KOG0700			AT3G16560.1		Protein phosphatase 2C family protein					GO:0003824 catalytic activity;GO:0004722 protein serine/threonine phosphatase activity
Pp1s92_3V6	-0.350237	-1.60777	1.78617	-1.75406		26	9	103	10	0.784455	0.328104	3.44897	0.296467	PF01225,PF08245,PF02875	PTHR23135
Pp1s98_250V6	-1.05068	-1.45577	2.46599	-1.90606		16	10	165	9	0.482742	0.36456	5.52506	0.266821	PF01370	PTHR10366	KOG1429	5.1.3.-,5.1.3.18	K10046	AT5G28840.2	GME	GDP-D-mannose 3\',5\'-epimerase				Ascorbate and aldarate metabolism;Amino sugar and nucleotide sugar metabolism;Metabolic pathways;Biosynthesis of secondary metabolites	GO:0003824 catalytic activity;GO:0009225 nucleotide-sugar metabolic process;GO:0047918 "GDP-mannose 3,5-epimerase activity";GO:0047918 "GDP-mannose 3,5-epimerase activity";GO:0019853 L-ascorbic acid biosynthetic process;GO:0051287 NAD or NADH binding;GO:0005829 cytosol
Pp1s11_29V6	-1.05068	-2.7777	5.77562	-3.32193		16	4	1636	0	0.482742	0.145824	54.7818	0	PF03330,PF01357					AT5G56320.1	EXPA14	expansin A14					GO:0005576 extracellular region;GO:0009826 unidimensional cell growth;GO:0009828 plant-type cell wall loosening;GO:0009831 plant-type cell wall modification involved in multidimensional cell growth;GO:0012505 endomembrane system;GO:0009826 unidimensional cell growth;GO:0009828 plant-type cell wall loosening
Pp1s112_169V6	4.0181	3.03608	6.14269	2.99011		537	225	2110	268	16.202	8.20261	70.6537	7.94532	PF08802,PF00355	PTHR10134	KOG1671	1.10.99.1	K02636	AT4G03280.1	PETC	photosynthetic electron transfer C				Photosynthesis;Metabolic pathways	GO:0010196 nonphotochemical quenching;GO:0009512 cytochrome b6f complex;GO:0009535 chloroplast thylakoid membrane;GO:0009767 photosynthetic electron transport chain;GO:0009767 photosynthetic electron transport chain;GO:0046028 "electron transporter, transferring electrons from cytochrome b6/f complex of photosystem II activity";GO:0005515 protein binding;GO:0009941 chloroplast envelope;GO:0009941…
Pp1s114_156V6	-1.88075	-3.32193	1.75788	-3.32193		9	0	101	0	0.271542	0	3.382	0	PF12056					AT3G20300.1		Protein of unknown function (DUF3537)
Pp1s15_409V6	4.24853	2.95022	6.33986	2.99548		630	212	2419	269	19.008	7.72868	81.0007	7.97497	PF04725				K03541	AT1G79040.1	PSBR	photosystem II subunit R				Photosynthesis;Metabolic pathways	GO:0003674 molecular_function;GO:0009523 photosystem II;GO:0015979 photosynthesis;GO:0009535 chloroplast thylakoid membrane;GO:0009507 chloroplast;GO:0009535 chloroplast thylakoid membrane;GO:0009535 chloroplast thylakoid membrane;GO:0010270 photosystem II oxygen evolving complex assembly;GO:0009507 chloroplast;GO:0009579 thylakoid
Pp1s241_62V6	0.375588	-0.133842	4.39658	-0.169093		43	25	629	30	1.29737	0.911401	21.0622	0.889402	PF06549					AT1G74730.1		Protein of unknown function (DUF1118)					GO:0003674 molecular_function;GO:0008150 biological_process;GO:0009535 chloroplast thylakoid membrane;GO:0009507 chloroplast;GO:0009535 chloroplast thylakoid membrane;GO:0009535 chloroplast thylakoid membrane;GO:0009507 chloroplast
Pp1s248_60V6	4.68064	3.4844	7.4261	3.87238		850	307	5136	494	25.6457	11.192	171.98	14.6455					K14332	AT1G08380.1	PSAO	photosystem I subunit O				Photosynthesis	GO:0003674 molecular_function;GO:0009522 photosystem I;GO:0009579 thylakoid;GO:0009768 "photosynthesis, light harvesting in photosystem I";GO:0009507 chloroplast;GO:0009579 thylakoid
Pp1s30_255V6	1.60754	0.54423	4.40573	0.756907		101	40	633	57	3.04731	1.45824	21.1961	1.68986	PF00141			1.11.1.11	K00434	AT4G09010.1	APX4	ascorbate peroxidase 4				Ascorbate and aldarate metabolism;Glutathione metabolism	GO:0004601 peroxidase activity;GO:0004601 peroxidase activity;GO:0006979 response to oxidative stress;GO:0020037 heme binding;GO:0055114 oxidation-reduction process;GO:0009543 chloroplast thylakoid lumen;GO:0031977 thylakoid lumen;GO:0009543 chloroplast thylakoid lumen;GO:0009579 thylakoid;GO:0009535 chloroplast thylakoid membrane;GO:0009507 chloroplast;GO:0009535 chloroplast thylakoid membrane;G…
Pp1s9_318V6	0.756679	-0.133842	3.11647	0.0532995		56	25	259	35	1.6896	0.911401	8.67266	1.03764	PF01373					AT4G00490.1	BAM2	beta-amylase 2					GO:0000272 polysaccharide catabolic process;GO:0005975 carbohydrate metabolic process;GO:0016161 beta-amylase activity;GO:0009507 chloroplast;GO:0016161 beta-amylase activity;GO:0009507 chloroplast
Pp1s182_81V6	4.86819	1.85166	7.2608	3.05844		968	99	4580	281	29.2059	3.60915	153.362	8.33073	PF00504	PTHR21649			K08912	AT2G05100.1	LHCB2.1	photosystem II light harvesting complex gene 2.1				Photosynthesis - antenna proteins;Metabolic pathways	GO:0015979 photosynthesis;GO:0016168 chlorophyll binding;GO:0030076 light-harvesting complex;GO:0009941 chloroplast envelope;GO:0009535 chloroplast thylakoid membrane;GO:0009507 chloroplast;GO:0009535 chloroplast thylakoid membrane;GO:0009535 chloroplast thylakoid membrane;GO:0010287 plastoglobule;GO:0016020 membrane;GO:0009507 chloroplast;GO:0009579 thylakoid;GO:0009637 response to blue light;GO…

## Sheet: cluster-4
#Gene	0h (TPM)	24h (TPM)	48h (TPM)	72h (TPM)		0h	24h	48h	72h	0h (TPM)	24h (TPM)	48h (TPM)	72h (TPM)	PFAM	Panther	KOG	KEGG ec	KEGG Orthology	best arabidopsis TAIR10 hit name	best arabidopsis TAIR10 hit symbol	best arabidopsis TAIR10 hit defline	best rice hit name	best rice hit symbol	best rice hit defline	Pathway	Go_terms
Pp1s199_72V6	3.09398	-1.45577	0.347594	6.86763		283	10	38	3939	8.5385	0.36456	1.27244	116.778
Pp1s22_283V6	0.158777	-3.32193	-3.32193	3.80666		37	0	0	472	1.11634	0	0	13.9933	PF00067	PTHR19383	KOG0157		K09832	AT2G34500.1	CYP710A1	cytochrome P450, family 710, subfamily A, polypeptide 1				Steroid biosynthesis;Biosynthesis of secondary metabolites	GO:0019825 oxygen binding;GO:0055114 oxidation-reduction process;GO:0000249 C-22 sterol desaturase activity
Pp1s5_17V6	2.56403	1.30976	1.54261	4.51834		196	68	87	773	5.91359	2.47901	2.91321	22.9169	PF05362	PTHR10046				AT5G26860.1	LON1	lon protease 1					GO:0001666 response to hypoxia;GO:0003697 single-stranded DNA binding;GO:0003727 single-stranded RNA binding;GO:0004176 ATP-dependent peptidase activity;GO:0004176 ATP-dependent peptidase activity;GO:0004252 serine-type endopeptidase activity;GO:0005524 ATP binding;GO:0006200 ATP catabolic process;GO:0006515 misfolded or incompletely synthesized protein catabolic process;GO:0007005 mitochondrion …
Pp1s54_217V6	4.5805	3.86255	3.38044	6.7366		793	399	311	3597	23.9259	14.546	10.4139	106.639	PF01090	PTHR11710	KOG3411		K02966	AT3G02080.1		Ribosomal protein S19e family protein				Ribosome	GO:0003735 structural constituent of ribosome;GO:0003735 structural constituent of ribosome;GO:0005840 ribosome;GO:0006412 translation;GO:0006412 translation;GO:0022626 cytosolic ribosome;GO:0022626 cytosolic ribosome;GO:0022626 cytosolic ribosome;GO:0005618 cell wall;GO:0022627 cytosolic small ribosomal subunit;GO:0005829 cytosol
Pp1s74_190V6	1.30688	0.837011	1.32849	3.64853		82	49	75	423	2.47405	1.78635	2.51139	12.5406	PF07145
Pp1s195_38V6	-0.243321	-3.19274	-2.90033	1.9013		28	3	4	126	0.844798	0.109368	0.133941	3.73549	PF00847				K09286	AT5G19790.1	RAP2.11	related to AP2 11					GO:0006355 "regulation of transcription, DNA-dependent";GO:0003700 sequence-specific DNA binding transcription factor activity;GO:0005634 nucleus;GO:0003677 DNA binding;GO:0003700 sequence-specific DNA binding transcription factor activity
Pp1s282_30V6	2.52675	1.2667	1.28949	4.94083		191	66	73	1036	5.76273	2.4061	2.44442	30.714	PF04278					AT4G33350.1		Tic22-like family protein					GO:0009706 chloroplast inner membrane;GO:0009941 chloroplast envelope;GO:0009941 chloroplast envelope;GO:0009507 chloroplast;GO:0009507 chloroplast
Pp1s3_387V6	0.119249	-1.7777	-3.32193	3.61052		36	8	0	412	1.08617	0.291648	0	12.2145
Pp1s32_160V6	3.32436	1.92274	2.52593	7.77303		332	104	172	7378	10.0169	3.79143	5.75945	218.734	PF03358,PF00258		KOG3135			AT5G54500.1	FQR1	flavodoxin-like quinone reductase 1					GO:0009733 response to auxin stimulus;GO:0010181 FMN binding;GO:0016655 "oxidoreductase activity, acting on NADH or NADPH, quinone or similar compound as acceptor";GO:0055114 oxidation-reduction process;GO:0005773 vacuole;GO:0005886 plasma membrane;GO:0005774 vacuolar membrane;GO:0005886 plasma membrane;GO:0016020 membrane;GO:0005886 plasma membrane;GO:0005829 cytosol
Pp1s35_94V6	3.52675	0.681733	0.59152	5.48721		382	44	45	1513	11.5255	1.60407	1.50683	44.8555	PF07992,PF00070,PF02852	PTHR22912	KOG1335	1.8.1.4	K00382	AT3G16950.2	LPD1	lipoamide dehydrogenase 1				Glycolysis / Gluconeogenesis;Citrate cycle (TCA cycle);Glycine, serine and threonine metabolism;Valine, leucine and isoleucine degradation;Pyruvate metabolism;Metabolic pathways;Biosynthesis of secondary metabolites	GO:0004148 dihydrolipoyl dehydrogenase activity;GO:0006086 acetyl-CoA biosynthetic process from pyruvate;GO:0009570 chloroplast stroma;GO:0009570 chloroplast stroma;GO:0009941 chloroplast envelope;GO:0009507 chloroplast;GO:0005730 nucleolus;GO:0005829 cytosol;GO:0005829 cytosol
Pp1s37_275V6	0.704211	-0.607773	-2.09298	3.75691		54	18	7	456	1.62925	0.656209	0.234396	13.5189	PF00141					AT3G01190.1		Peroxidase superfamily protein				Phenylalanine metabolism;Phenylpropanoid biosynthesis;Metabolic pathways;Biosynthesis of secondary metabolites	GO:0004601 peroxidase activity;GO:0004601 peroxidase activity;GO:0006979 response to oxidative stress;GO:0012505 endomembrane system;GO:0020037 heme binding;GO:0055114 oxidation-reduction process
Pp1s376_26V6	-0.658359	-3.32193	-3.90033	2.48626		21	0	2	189	0.633599	0	0.0669704	5.60323						AT4G36945.1		PLC-like phosphodiesterases superfamily protein					GO:0004629 phospholipase C activity;GO:0006629 lipid metabolic process;GO:0008081 phosphoric diester hydrolase activity;GO:0012505 endomembrane system;GO:0035556 intracellular signal transduction
Pp1s397_2V6	1.47289	-0.870808	-1.90033	3.9013		92	15	8	504	2.77577	0.546841	0.267882	14.9419	PF00664,PF00005	PTHR19242	KOG0055			AT3G28345.1		ABC transporter family protein					GO:0006200 ATP catabolic process;GO:0010315 auxin efflux;GO:0010329 auxin efflux transmembrane transporter activity;GO:0010540 basipetal auxin transport;GO:0010541 acropetal auxin transport;GO:0016021 integral to membrane;GO:0042626 "ATPase activity, coupled to transmembrane movement of substances";GO:0042626 "ATPase activity, coupled to transmembrane movement of substances";GO:0055085 transmembr…
Pp1s407_3V6	0.564034	-2.7777	-1.19989	2.81883		49	4	13	238	1.4784	0.145824	0.435307	7.05592	PF11717,PF05712	PTHR10880			K11339	AT4G37280.1		MRG family protein					GO:0003682 chromatin binding;GO:0006333 chromatin assembly or disassembly
Pp1s43_209V6	0.649763	-2.19274	-0.81287	2.65194		52	6	17	212	1.56891	0.218736	0.569248	6.28511						AT4G08810.1	SUB1	calcium ion binding					GO:0008150 biological_process;GO:0005509 calcium ion binding;GO:0042175 nuclear membrane-endoplasmic reticulum network
Pp1s44_268V6	5.41387	3.74978	4.01853	8.03123		1413	369	484	8824	42.6321	13.4523	16.2068	261.603	PF02446			2.4.1.25	K00705	AT5G64860.1	DPE1	disproportionating enzyme				Starch and sucrose metabolism;Metabolic pathways	GO:0004134 4-alpha-glucanotransferase activity;GO:0000025 maltose catabolic process;GO:0004134 4-alpha-glucanotransferase activity;GO:0004134 4-alpha-glucanotransferase activity;GO:0005983 starch catabolic process;GO:0005983 starch catabolic process;GO:0006006 glucose metabolic process;GO:0005983 starch catabolic process;GO:0009507 chloroplast;GO:0000025 maltose catabolic process;GO:0005983 starc…
Pp1s460_1V6	3.2531	2.72215	3.02448	5.43676		316	181	243	1461	9.53415	6.59854	8.1369	43.3139	PF00462	PTHR10293	KOG1752			AT2G38270.1	CXIP2	CAX-interacting protein 2					GO:0009055 electron carrier activity;GO:0015035 protein disulfide oxidoreductase activity;GO:0006812 cation transport;GO:0009507 chloroplast;GO:0009570 chloroplast stroma
Pp1s506_15V6	1.47289	-0.607773	-3.90033	4.92402		92	18	2	1024	2.77577	0.656209	0.0669704	30.3582	PF08240,PF00107	PTHR11695	KOG0022			AT5G43940.1	HOT5	GroES-like zinc-binding dehydrogenase family protein				Glycolysis / Gluconeogenesis;Fatty acid metabolism;Tyrosine metabolism;Metabolic pathways;Biosynthesis of secondary metabolites	GO:0046292 formaldehyde metabolic process;GO:0051903 S-(hydroxymethyl)glutathione dehydrogenase activity;GO:0005777 peroxisome;GO:0005777 peroxisome;GO:0010286 heat acclimation;GO:0048316 seed development;GO:0080007 S-nitrosoglutathione reductase activity;GO:0008219 cell death;GO:0005829 cytosol;GO:0046292 formaldehyde metabolic process;GO:0051903 S-(hydroxymethyl)glutathione dehydrogenase activi…
Pp1s6_413V6	2.97723	2.64015	2.83438	5.36177		261	171	213	1387	7.87473	6.23398	7.13235	41.12						AT1G70480.2		Domain of unknown function (DUF220)					GO:0003674 molecular_function;GO:0008150 biological_process
Pp1s65_130V6	-0.350237	-1.97034	-1.09298	2.04296		26	7	14	139	0.784455	0.255192	0.468793	4.12089	PF02798,PF00043	PTHR11260	KOG4420			AT1G77290.2		Glutathione S-transferase family protein					GO:0005886 plasma membrane;GO:0005886 plasma membrane
Pp1s66_60V6	-0.143786	-2.45577	-3.90033	2.6035		30	5	2	205	0.905141	0.18228	0.0669704	6.07758						AT1G36990.1
Pp1s71_170V6	0.756679	-1.19274	-3.32193	2.7882		56	12	0	233	1.6896	0.437472	0	6.90769	PF00501	PTHR11968	KOG1176	6.2.1.12	K01904	AT1G65060.1	4CL3	4-coumarate:CoA ligase 3				Ubiquinone and other terpenoid-quinone biosynthesis;Phenylalanine metabolism;Phenylpropanoid biosynthesis;Metabolic pathways;Biosynthesis of secondary metabolites	GO:0005575 cellular_component;GO:0010584 pollen exine formation;GO:0009411 response to UV;GO:0009611 response to wounding;GO:0009698 phenylpropanoid metabolic process;GO:0009698 phenylpropanoid metabolic process;GO:0016207 4-coumarate-CoA ligase activity;GO:0016207 4-coumarate-CoA ligase activity;GO:0050832 defense response to fungus
Pp1s75_107V6	6.00189	3.84069	2.69958	9.26066		2124	393	194	20690	64.084	14.3272	6.49613	613.391	PF02798,PF00043	PTHR11260	KOG0867			AT2G30870.1	GSTF10	glutathione S-transferase PHI 10					GO:0004364 glutathione transferase activity;GO:0005737 cytoplasm;GO:0009407 toxin catabolic process;GO:0043295 glutathione binding;GO:0005773 vacuole;GO:0005618 cell wall;GO:0046686 response to cadmium ion;GO:0005507 copper ion binding;GO:0005886 plasma membrane;GO:0009507 chloroplast;GO:0048046 apoplast;GO:0005515 protein binding;GO:0005507 copper ion binding;GO:0005829 cytosol;GO:0009414 respon…
Pp1s76_162V6	-0.40682	-1.97034	-0.578405	3.05844		25	7	20	281	0.754284	0.255192	0.669704	8.33073	PF01474	PTHR21337				AT4G39980.1	DHS1	3-deoxy-D-arabino-heptulosonate 7-phosphate synthase 1				Phenylalanine, tyrosine and tryptophan biosynthesis;Metabolic pathways;Biosynthesis of secondary metabolites	GO:0003849 3-deoxy-7-phosphoheptulonate synthase activity;GO:0009073 aromatic amino acid family biosynthetic process;GO:0009073 aromatic amino acid family biosynthetic process;GO:0009423 chorismate biosynthetic process;GO:0009507 chloroplast;GO:0009507 chloroplast;GO:0003849 3-deoxy-7-phosphoheptulonate synthase activity;GO:0003849 3-deoxy-7-phosphoheptulonate synthase activity;GO:0009073 aromati…
Pp1s96_30V6	5.21962	4.22793	4.69772	7.63482		1235	514	775	6704	37.2616	18.7384	25.951	198.752	PF08263,PF00560,PF00059	PTHR23258				AT4G13340.1		Leucine-rich repeat (LRR) family protein					GO:0005515 protein binding;GO:0005199 structural constituent of cell wall;GO:0005618 cell wall;GO:0009505 plant-type cell wall
Pp1s98_2V6	5.92015	4.70813	4.04803	8.08751		2007	717	494	9175	60.5539	26.139	16.5417	272.009	PF08534,PF00255	PTHR11592	KOG1651			AT4G11600.1	GPX6	glutathione peroxidase 6				Glutathione metabolism;Arachidonic acid metabolism	GO:0004602 glutathione peroxidase activity;GO:0005739 mitochondrion;GO:0005829 cytosol;GO:0005886 plasma membrane;GO:0005739 mitochondrion;GO:0046686 response to cadmium ion;GO:0005886 plasma membrane;GO:0009651 response to salt stress;GO:0009507 chloroplast;GO:0005829 cytosol;GO:0004602 glutathione peroxidase activity
Pp1s99_59V6	1.47289	0.309764	0.491984	4.93245		92	34	42	1030	2.77577	1.23951	1.40638	30.5361		PTHR19410	KOG0725	1.3.1.9	K00208	AT2G05990.1	MOD1	NAD(P)-binding Rossmann-fold superfamily protein				Fatty acid biosynthesis;Metabolic pathways	GO:0016491 oxidoreductase activity;GO:0005835 fatty acid synthase complex;GO:0006633 fatty acid biosynthetic process;GO:0016631 enoyl-[acyl-carrier-protein] reductase activity;GO:0009579 thylakoid;GO:0009579 thylakoid;GO:0009941 chloroplast envelope;GO:0009941 chloroplast envelope;GO:0009507 chloroplast;GO:0009507 chloroplast;GO:0009570 chloroplast stroma;GO:0009507 chloroplast;GO:0009507 chlorop…
Pp1s1_372V6	0.59318	-0.192736	-0.578405	3.49766		50	24	20	381	1.50857	0.874945	0.669704	11.2954	PF01370	PTHR10366	KOG1371	5.1.3.2	K01784	AT4G10960.1	UGE5	UDP-D-glucose/UDP-D-galactose 4-epimerase 5				Galactose metabolism;Amino sugar and nucleotide sugar metabolism;Metabolic pathways	GO:0003978 UDP-glucose 4-epimerase activity;GO:0046983 protein dimerization activity;GO:0003978 UDP-glucose 4-epimerase activity;GO:0006950 response to stress
Pp1s10_201V6	3.16849	2.15304	2.81391	5.63568		298	122	210	1677	8.99107	4.44764	7.03189	49.7176	PF02874,PF00006,PF00306	PTHR15184	KOG1352	3.6.3.14	K02145	AT1G78900.2	VHA-A	vacuolar ATP synthase subunit A				Oxidative phosphorylation;Metabolic pathways;Phagosome	GO:0005524 ATP binding;GO:0005524 ATP binding;GO:0005524 ATP binding;GO:0015992 proton transport;GO:0016820 "hydrolase activity, acting on acid anhydrides, catalyzing transmembrane movement of substances";GO:0016820 "hydrolase activity, acting on acid anhydrides, catalyzing transmembrane movement of substances";GO:0046933 "hydrogen ion transporting ATP synthase activity, rotational mechanism";GO:…
Pp1s101_226V6	1.30688	0.0296564	-0.652406	3.66211		82	28	19	427	2.47405	1.02077	0.636219	12.6592	PF00230	PTHR19139	KOG0223			AT3G16240.1	DELTA-TIP	delta tonoplast integral protein					GO:0006810 transport;GO:0015250 water channel activity;GO:0016020 membrane;GO:0009941 chloroplast envelope;GO:0015204 urea transmembrane transporter activity;GO:0015840 urea transport;GO:0009507 chloroplast;GO:0005886 plasma membrane;GO:0005773 vacuole;GO:0015200 methylammonium transmembrane transporter activity;GO:0051739 ammonia transmembrane transporter activity;GO:0005618 cell wall;GO:0009505…
Pp1s115_59V6	1.73068	1.2667	1.65426	3.94361		110	66	94	519	3.31885	2.4061	3.14761	15.3866		PTHR22959:SF2				AT1G11400.2	PYM	partner of Y14-MAGO				RNA transport;mRNA surveillance pathway	GO:0008150 biological_process;GO:0005515 protein binding;GO:0005515 protein binding;GO:0005654 nucleoplasm;GO:0005730 nucleolus;GO:0005737 cytoplasm
Pp1s119_22V6	3.45315	0.648566	2.41255	6.73419		363	43	159	3591	10.9522	1.56761	5.32414	106.461	PF08545,PF08541			2.3.1.180	K00648	AT1G62640.1	KAS III	3-ketoacyl-acyl carrier protein synthase III				Fatty acid biosynthesis;Metabolic pathways	GO:0003824 catalytic activity;GO:0003824 catalytic activity;GO:0004315 3-oxoacyl-[acyl-carrier-protein] synthase activity;GO:0004315 3-oxoacyl-[acyl-carrier-protein] synthase activity;GO:0004315 3-oxoacyl-[acyl-carrier-protein] synthase activity;GO:0006633 fatty acid biosynthetic process;GO:0006633 fatty acid biosynthetic process;GO:0006633 fatty acid biosynthetic process;GO:0008152 metabolic pro…
Pp1s126_26V6	6.27631	5.63169	4.49841	9.42697		2569	1360	675	23218	77.5102	49.5802	22.6025	688.338	PF00043	PTHR11260	KOG2903		K07393	AT4G19880.1		Glutathione S-transferase family protein					GO:0003674 molecular_function;GO:0046686 response to cadmium ion;GO:0046686 response to cadmium ion;GO:0046686 response to cadmium ion;GO:0005829 cytosol;GO:0005829 cytosol;GO:0005829 cytosol
Pp1s157_6V6	-0.658359	-3.32193	-2.09298	1.8898		21	0	7	125	0.633599	0	0.234396	3.70584	PF00646					AT1G27340.1		Galactose oxidase/kelch repeat superfamily protein					GO:0003674 molecular_function;GO:0008150 biological_process
Pp1s158_5V6	1.2531	-0.022811	0.525932	4.00882		79	27	43	543	2.38354	0.984313	1.43986	16.0982	PF00481	PTHR13832	KOG0697	3.1.3.16	K01090	AT4G31860.1		Protein phosphatase 2C family protein					GO:0003824 catalytic activity;GO:0003824 catalytic activity;GO:0004722 protein serine/threonine phosphatase activity;GO:0004722 protein serine/threonine phosphatase activity;GO:0004722 protein serine/threonine phosphatase activity;GO:0006470 protein dephosphorylation;GO:0006470 protein dephosphorylation;GO:0005886 plasma membrane;GO:0005886 plasma membrane
Pp1s16_192V6	0.704211	-1.19274	-3.90033	2.65194		54	12	2	212	1.62925	0.437472	0.0669704	6.28511	PF00628					AT1G02070.1							GO:0005575 cellular_component
Pp1s160_44V6	1.57868	0.431755	1.5754	6.166		99	37	89	2422	2.98697	1.34887	2.98018	71.8044	PF00108,PF02803	PTHR18919	KOG1390	2.3.1.9	K00626	AT5G47720.2		Thiolase family protein				Fatty acid metabolism;Synthesis and degradation of ketone bodies;Valine, leucine and isoleucine degradation;Lysine degradation;Tryptophan metabolism;Pyruvate metabolism;Glyoxylate and dicarboxylate metabolism;Propanoate metabolism;Butanoate metabolism;Terpenoid backbone biosynthesis;Metabolic pathways;Biosynthesis of secondary metabolites	GO:0003824 catalytic activity;GO:0003824 catalytic activity;GO:0003824 catalytic activity;GO:0003824 catalytic activity;GO:0003824 catalytic activity;GO:0003985 acetyl-CoA C-acetyltransferase activity;GO:0005575 cellular_component;GO:0008152 metabolic process;GO:0008152 metabolic process;GO:0008152 metabolic process;GO:0008152 metabolic process;GO:0008152 metabolic process;GO:0016747 "transferase…
Pp1s160_61V6	-0.40682	-0.777698	-1.90033	1.8898		25	16	8	125	0.754284	0.583297	0.267882	3.70584	PF00249	PTHR10641	KOG0051			AT5G41020.1		myb family transcription factor					GO:0003677 DNA binding;GO:0003677 DNA binding;GO:0003700 sequence-specific DNA binding transcription factor activity
Pp1s18_318V6	0.197251	-0.192736	-2.31537	2.15284		38	24	6	150	1.14651	0.874945	0.200911	4.44701						AT5G49960.1
Pp1s185_137V6	1.40876	0.129192	-0.0423521	4.29906		88	30	29	664	2.65508	1.09368	0.97107	19.6854	PF00097	PTHR22765				AT3G05200.1	ATL6	RING/U-box superfamily protein					GO:0008270 zinc ion binding;GO:0008270 zinc ion binding;GO:0005886 plasma membrane;GO:0004842 ubiquitin-protein ligase activity;GO:0016567 protein ubiquitination;GO:0005886 plasma membrane;GO:0010200 response to chitin
Pp1s199_145V6	-1.59124	-3.7777	-1.19989	6.33817		11	2	13	2729	0.331885	0.0729121	0.435307	80.9059	PF00676	PTHR11516	KOG0225	1.2.4.1	K00161	AT1G01090.1	PDH-E1 ALPHA	pyruvate dehydrogenase E1 alpha				Glycolysis / Gluconeogenesis;Citrate cycle (TCA cycle);Valine, leucine and isoleucine biosynthesis;Pyruvate metabolism;Butanoate metabolism;Metabolic pathways;Biosynthesis of secondary metabolites	GO:0004739 pyruvate dehydrogenase (acetyl-transferring) activity;GO:0006096 glycolysis;GO:0008152 metabolic process;GO:0008152 metabolic process;GO:0055114 oxidation-reduction process;GO:0009941 chloroplast envelope;GO:0009507 chloroplast;GO:0005829 cytosol;GO:0004739 pyruvate dehydrogenase (acetyl-transferring) activity;GO:0009536 plastid
Pp1s20_332V6	0.0367866	-1.60777	-1.31537	3.8158		34	9	12	475	1.02583	0.328104	0.401822	14.0822		PTHR12668				AT2G38550.1		Transmembrane proteins 14C					GO:0008150 biological_process;GO:0009706 chloroplast inner membrane;GO:0009941 chloroplast envelope;GO:0009941 chloroplast envelope;GO:0005739 mitochondrion;GO:0009536 plastid;GO:0009507 chloroplast
Pp1s205_25V6	4.52297	3.29376	3.29934	7.06293		762	269	294	4510	22.9906	9.80667	9.84465	133.707	PF00224,PF02887	PTHR11817	KOG2323	2.7.1.40	K00873	AT5G52920.1	PKP-BETA1	plastidic pyruvate kinase beta subunit 1				Glycolysis / Gluconeogenesis;Purine metabolism;Pyruvate metabolism;Carbon fixation in photosynthetic organisms;Metabolic pathways;Biosynthesis of secondary metabolites	GO:0004743 pyruvate kinase activity;GO:0006096 glycolysis;GO:0005739 mitochondrion;GO:0009570 chloroplast stroma;GO:0046686 response to cadmium ion;GO:0004743 pyruvate kinase activity;GO:0009570 chloroplast stroma;GO:0006633 fatty acid biosynthetic process;GO:0009507 chloroplast;GO:0048316 seed development;GO:0009507 chloroplast;GO:0006629 lipid metabolic process;GO:0005829 cytosol
Pp1s207_40V6	0.856214	-3.32193	-0.993443	3.12369		60	0	15	294	1.81028	0	0.502278	8.71614
Pp1s213_14V6	1.51918	-0.022811	0.800107	3.50898		95	27	52	384	2.86628	0.984313	1.74123	11.3843	PF02410	PTHR21043				AT3G12930.1		Lojap-related protein					GO:0008150 biological_process;GO:0009507 chloroplast
Pp1s214_75V6	1.40876	0.507704	0.525932	5.36696		88	39	43	1392	2.65508	1.42179	1.43986	41.2682
Pp1s217_71V6	2.16849	0.54423	1.45722	4.14076		149	40	82	595	4.49553	1.45824	2.74579	17.6398	PF00241	PTHR11913	KOG1735		K05765	AT4G00680.1	ADF8	actin depolymerizing factor 8					GO:0003779 actin binding;GO:0005622 intracellular;GO:0005622 intracellular;GO:0008150 biological_process
Pp1s22_276V6	0.926604	0.950222	-0.81287	3.49766		63	53	17	381	1.9008	1.93217	0.569248	11.2954						AT4G38100.1							GO:0009535 chloroplast thylakoid membrane;GO:0009535 chloroplast thylakoid membrane
Pp1s222_133V6	-0.243321	-2.19274	0.144061	2.6988		28	6	33	219	0.844798	0.218736	1.10501	6.49263	PF04057,PF01336,PF08646,PF00098	PTHR23273			K07466	AT5G45400.1	RPA70C	Replication factor-A protein 1-related				DNA replication;Nucleotide excision repair;Mismatch repair;Homologous recombination	GO:0003676 nucleic acid binding;GO:0003677 DNA binding;GO:0005634 nucleus;GO:0006260 DNA replication;GO:0006260 DNA replication;GO:0008270 zinc ion binding
Pp1s229_16V6	0.441177	-0.970344	0.269592	2.73137		45	14	36	224	1.35771	0.510385	1.20547	6.64087	PF04410	PTHR23237	KOG3262		K11128	AT3G03920.1		H/ACA ribonucleoprotein complex, subunit Gar1/Naf1 protein				Ribosome biogenesis in eukaryotes	GO:0003723 RNA binding;GO:0009982 pseudouridine synthase activity;GO:0030515 snoRNA binding;GO:0009535 chloroplast thylakoid membrane;GO:0009535 chloroplast thylakoid membrane;GO:0005730 nucleolus;GO:0005829 cytosol
Pp1s23_198V6	3.68742	2.38217	3.31399	5.97658		427	143	297	2124	12.8832	5.21321	9.9451	62.9696	PF02298					AT2G32300.1	UCC1	uclacyanin 1					GO:0005507 copper ion binding;GO:0005507 copper ion binding;GO:0009055 electron carrier activity;GO:0031225 anchored to membrane;GO:0031225 anchored to membrane
Pp1s232_55V6	-0.40682	-3.32193	0.144061	2.47861		25	0	33	188	0.754284	0	1.10501	5.57358
Pp1s234_73V6	1.19725	0.837011	0.0538632	4.82186		76	49	31	954	2.29302	1.78635	1.03804	28.283	PF07719,PF00515,PF08492	PTHR14094	KOG2376		K03108	AT1G67680.1		SRP72 RNA-binding domain				Protein export	GO:0006614 SRP-dependent cotranslational protein targeting to membrane;GO:0008312 7S RNA binding;GO:0005829 cytosol
Pp1s238_55V6	-2.46571	-3.32193	-1.90033	2.43972		6	0	8	183	0.181028	0	0.267882	5.42535						AT1G36990.1
Pp1s257_13V6	0.564034	0.0296564	0.772092	3.49766		49	28	51	381	1.4784	1.02077	1.70774	11.2954	PF00166	PTHR10772	KOG1641			AT3G60210.1		GroES-like family protein					GO:0005524 ATP binding;GO:0005737 cytoplasm;GO:0006457 protein folding;GO:0009507 chloroplast
Pp1s257_89V6	1.91511	1.02966	0.30912	4.00083		125	56	37	540	3.77142	2.04154	1.23895	16.0092	PF01399	PTHR10855	KOG1498			AT5G09900.1	EMB2107	26S proteasome regulatory subunit, putative (RPN5)				Proteasome	GO:0003674 molecular_function;GO:0003674 molecular_function;GO:0008541 "proteasome regulatory particle, lid subcomplex";GO:0009793 embryo development ending in seed dormancy;GO:0006511 ubiquitin-dependent protein catabolic process;GO:0005634 nucleus;GO:0005737 cytoplasm;GO:0007275 multicellular organismal development;GO:0000502 proteasome complex;GO:0005829 cytosol;GO:0005829 cytosol
Pp1s26_95V6	1.17814	0.0802825	0.854554	3.12369		75	29	54	294	2.26285	1.05723	1.8082	8.71614	PF03371	PTHR23142	KOG2888		K12850	AT5G37370.1	ATSRL1	PRP38 family protein				Spliceosome	GO:0005488 binding;GO:0006396 RNA processing;GO:0009651 response to salt stress;GO:0009651 response to salt stress
Pp1s268_77V6	0.271252	-0.607773	0.559099	3.3711		40	18	44	349	1.20685	0.656209	1.47335	10.3467		PTHR10072				AT5G03900.2		Iron-sulphur cluster biosynthesis family protein					GO:0003674 molecular_function;GO:0008150 biological_process;GO:0009941 chloroplast envelope;GO:0009941 chloroplast envelope
Pp1s269_14V6	-1.14379	-0.777698	0.0996669	2.87238		15	16	32	247	0.45257	0.583297	1.07153	7.32274	PF01991	PTHR11583	KOG1664	3.6.3.14	K02150	AT4G11150.1	TUF	vacuolar ATP synthase subunit E1				Oxidative phosphorylation;Metabolic pathways;Phagosome	GO:0005753 mitochondrial proton-transporting ATP synthase complex;GO:0009793 embryo development ending in seed dormancy;GO:0015986 ATP synthesis coupled proton transport;GO:0009409 response to cold;GO:0005773 vacuole;GO:0005773 vacuole;GO:0005773 vacuole;GO:0007030 Golgi organization;GO:0009705 plant-type vacuole membrane;GO:0009793 embryo development ending in seed dormancy;GO:0009832 plant-type…
Pp1s269_47V6	4.08118	4.38217	3.97618	6.31365		561	572	470	2683	16.9261	20.8529	15.738	79.5422	PF00107	PTHR11695	KOG1196			AT3G03080.1		Zinc-binding dehydrogenase family protein					GO:0003824 catalytic activity;GO:0005488 binding;GO:0008152 metabolic process;GO:0008270 zinc ion binding;GO:0016491 oxidoreductase activity;GO:0055114 oxidation-reduction process
Pp1s279_63V6	-1.05068	-1.19274	-2.31537	2.29034		16	12	6	165	0.482742	0.437472	0.200911	4.89171		PTHR21251:SF7				AT4G31360.1		selenium binding					GO:0008430 selenium binding;GO:0045454 cell redox homeostasis
Pp1s28_325V6	0.271252	0.54423	-0.0929782	2.8898		40	40	28	250	1.20685	1.45824	0.937585	7.41168	PF00098
Pp1s280_48V6	0.119249	0.222302	-1.4409	2.29906		36	32	11	166	1.08617	1.16659	0.368337	4.92136	PF00168,PF08372	PTHR10024				AT5G48060.1		C2 calcium/lipid-binding plant phosphoribosyltransferase family protein					GO:0003674 molecular_function;GO:0005575 cellular_component;GO:0008150 biological_process
Pp1s298_4V6	2.91511	2.74586	2.78617	5.34608		250	184	206	1372	7.54284	6.70791	6.89795	40.6753	PF00067	PTHR19383	KOG0156	1.14.13.11	K00487	AT2G30490.1	C4H	cinnamate-4-hydroxylase				Phenylalanine metabolism;Phenylpropanoid biosynthesis;Flavonoid biosynthesis;Stilbenoid, diarylheptanoid and gingerol biosynthesis;Metabolic pathways;Biosynthesis of secondary metabolites	GO:0009505 plant-type cell wall;GO:0005783 endoplasmic reticulum;GO:0005774 vacuolar membrane;GO:0005886 plasma membrane;GO:0016020 membrane;GO:0005886 plasma membrane;GO:0009555 pollen development;GO:0009698 phenylpropanoid metabolic process;GO:0009808 lignin metabolic process;GO:0032502 developmental process;GO:0040007 growth;GO:0080167 response to karrikin;GO:0009416 response to light stimulus…
Pp1s30_197V6	0.375588	-0.254137	0.457219	3.00617		43	23	41	271	1.29737	0.838489	1.37289	8.03426						AT2G45260.1		Plant protein of unknown function (DUF641)					GO:0003674 molecular_function;GO:0008150 biological_process;GO:0005774 vacuolar membrane
Pp1s300_1V6	0.271252	-0.529771	0.98231	2.92964		40	19	59	257	1.20685	0.692665	1.97563	7.61921	PF00166	PTHR10772	KOG1641			AT5G20720.3	CPN20	chaperonin 20					GO:0009507 chloroplast;GO:0005516 calmodulin binding;GO:0009579 thylakoid;GO:0009579 thylakoid;GO:0009941 chloroplast envelope;GO:0009941 chloroplast envelope;GO:0009941 chloroplast envelope;GO:0009941 chloroplast envelope;GO:0009409 response to cold;GO:0009535 chloroplast thylakoid membrane;GO:0009535 chloroplast thylakoid membrane;GO:0009579 thylakoid;GO:0009579 thylakoid;GO:0009507 chloroplast…
Pp1s303_21V6	2.04736	2.27758	1.93256	4.8279		137	133	114	958	4.13348	4.84865	3.81731	28.4016	PF02466	PTHR10485	KOG1652			AT2G37410.2	TIM17-2	translocase inner membrane subunit 17-2					GO:0005744 mitochondrial inner membrane presequence translocase complex;GO:0008565 protein transporter activity;GO:0008565 protein transporter activity;GO:0015031 protein transport;GO:0015450 P-P-bond-hydrolysis-driven protein transmembrane transporter activity;GO:0005744 mitochondrial inner membrane presequence translocase complex;GO:0005739 mitochondrion;GO:0005743 mitochondrial inner membrane;…
Pp1s304_9V6	3.87116	4.03928	4.8445	6.9321		485	451	858	4119	14.6331	16.4417	28.7303	122.115	PF00828	PTHR10934	KOG1714		K02883	AT3G05590.1	RPL18	ribosomal protein L18				Ribosome	GO:0003735 structural constituent of ribosome;GO:0003735 structural constituent of ribosome;GO:0006412 translation;GO:0006412 translation;GO:0015934 large ribosomal subunit;GO:0015934 large ribosomal subunit;GO:0009507 chloroplast;GO:0005773 vacuole;GO:0015934 large ribosomal subunit;GO:0005774 vacuolar membrane;GO:0005886 plasma membrane;GO:0022625 cytosolic large ribosomal subunit;GO:0009507 ch…
Pp1s305_5V6	-4.05068	-3.19274	-1.73041	1.73137		2	3	9	112	0.0603427	0.109368	0.301367	3.32043	PF01535	PTHR10483				AT2G01860.1	EMB975	Tetratricopeptide repeat (TPR)-like superfamily protein					GO:0003674 molecular_function;GO:0008150 biological_process;GO:0009507 chloroplast
Pp1s31_128V6	3.82584	3.86255	3.07121	6.0358		470	399	251	2213	14.1805	14.546	8.40478	65.6082	PF00578,PF08534	PTHR10430	KOG0541			AT3G06050.1	PRXIIF	peroxiredoxin IIF					GO:0016209 antioxidant activity;GO:0005739 mitochondrion;GO:0006979 response to oxidative stress;GO:0005739 mitochondrion;GO:0004601 peroxidase activity;GO:0005759 mitochondrial matrix;GO:0006979 response to oxidative stress;GO:0046686 response to cadmium ion;GO:0005739 mitochondrion
Pp1s32_197V6	-0.802749	-0.690236	-3.32193	2.3249		19	17	0	169	0.573256	0.619753	0	5.0103	PF01423	PTHR10701	KOG3168		K11086	AT5G44500.2		Small nuclear ribonucleoprotein family protein				Spliceosome	GO:0003674 molecular_function;GO:0005634 nucleus;GO:0005732 small nucleolar ribonucleoprotein complex;GO:0005730 nucleolus;GO:0005730 nucleolus;GO:0005829 cytosol;GO:0005829 cytosol
Pp1s32_31V6	2.00461	2.42197	0.98231	4.39772		133	147	59	711	4.01279	5.35904	1.97563	21.0788	PF04043,PF01095			3.1.1.11	K01051	AT5G27870.1		Plant invertase/pectin methylesterase inhibitor superfamily					GO:0004857 enzyme inhibitor activity;GO:0009505 plant-type cell wall;GO:0030599 pectinesterase activity;GO:0030599 pectinesterase activity;GO:0042545 cell wall modification;GO:0042545 cell wall modification
Pp1s336_13V6	1.47289	1.39223	1.24941	3.90416		92	72	71	505	2.77577	2.62483	2.37745	14.9716	PF01351	PTHR10954				AT2G25100.2		Polynucleotidyl transferase, ribonuclease H-like superfamily protein				DNA replication	GO:0003676 nucleic acid binding;GO:0003676 nucleic acid binding;GO:0003723 RNA binding;GO:0003723 RNA binding;GO:0003824 catalytic activity;GO:0004523 ribonuclease H activity;GO:0004523 ribonuclease H activity;GO:0016070 RNA metabolic process;GO:0016070 RNA metabolic process
Pp1s337_21V6	2.22545	2.02966	2.17648	5.79207		155	112	135	1869	4.67656	4.08308	4.5205	55.4097	PF00022	PTHR11937	KOG0676		K10355	AT5G09810.1	ACT7	actin 7					GO:0007010 cytoskeleton organization;GO:0009733 response to auxin stimulus;GO:0009845 seed germination;GO:0048364 root development;GO:0005739 mitochondrion;GO:0005730 nucleolus;GO:0005618 cell wall;GO:0005886 plasma membrane;GO:0005886 plasma membrane;GO:0010053 root epidermal cell differentiation;GO:0048364 root development;GO:0048767 root hair elongation;GO:0051301 cell division;GO:0005515 prot…
Pp1s350_40V6	2.12923	0.54423	1.98231	5.68307		145	40	118	1733	4.37485	1.45824	3.95125	51.3778	PF01680		KOG1606	4.-.-.-	K06215	AT5G01410.1	RSR4	Aldolase-type TIM barrel family protein				Vitamin B6 metabolism	GO:0010224 response to UV-B;GO:0005829 cytosol;GO:0042819 vitamin B6 biosynthetic process;GO:0005886 plasma membrane;GO:0006950 response to stress;GO:0006979 response to oxidative stress;GO:0006982 response to lipid hydroperoxide;GO:0008615 pyridoxine biosynthetic process;GO:0012505 endomembrane system;GO:0042538 hyperosmotic salinity response;GO:0005515 protein binding;GO:0006520 cellular amino …
Pp1s359_40V6	0.234726	0.922741	-0.376771	2.92964		39	52	23	257	1.17668	1.89571	0.770159	7.61921	PF00291	PTHR10314	KOG1481	2.5.1.47	K01738	AT1G55880.1		Pyridoxal-5\'-phosphate-dependent enzyme family protein				Cysteine and methionine metabolism;Sulfur metabolism;Metabolic pathways	GO:0003824 catalytic activity;GO:0003824 catalytic activity;GO:0006520 cellular amino acid metabolic process;GO:0006535 cysteine biosynthetic process from serine;GO:0006535 cysteine biosynthetic process from serine;GO:0008152 metabolic process;GO:0008152 metabolic process;GO:0016829 lyase activity;GO:0030170 pyridoxal phosphate binding;GO:0030170 pyridoxal phosphate binding
Pp1s37_244V6	2.36718	2.66525	-0.0423521	5.40177		171	174	29	1426	5.1593	6.34335	0.97107	42.2762	PF12171,PF00096	PTHR11389				AT1G34370.2	STOP1	C2H2 and C2HC zinc fingers superfamily protein					GO:0003676 nucleic acid binding;GO:0008270 zinc ion binding;GO:0003700 sequence-specific DNA binding transcription factor activity;GO:0006355 "regulation of transcription, DNA-dependent";GO:0005634 nucleus;GO:0010044 response to aluminum ion;GO:0010447 response to acidity;GO:0005634 nucleus;GO:0006355 "regulation of transcription, DNA-dependent"
Pp1s37_317V6	0.408755	-3.32193	0.269592	2.70538		44	0	36	220	1.32754	0	1.20547	6.52228	PF00583					AT3G22560.1		Acyl-CoA N-acyltransferases (NAT) superfamily protein					GO:0008080 N-acetyltransferase activity;GO:0008080 N-acetyltransferase activity;GO:0008152 metabolic process;GO:0008152 metabolic process;GO:0016020 membrane
Pp1s371_43V6	-1.14379	-0.385381	-2.09298	1.99011		15	21	7	134	0.45257	0.765577	0.234396	3.97266	PF00412,PF12315	PTHR18973	KOG1703			AT1G19270.1	DA1	DA1					GO:0043130 ubiquitin binding;GO:0043130 ubiquitin binding;GO:0046621 negative regulation of organ growth;GO:0048317 seed morphogenesis;GO:0048482 ovule morphogenesis
Pp1s39_119V6	0.926604	1.19958	-1.4409	4.00617		63	63	11	542	1.9008	2.29673	0.368337	16.0685	PF00631					AT3G63420.1	GG1	Ggamma-subunit 1					GO:0005525 GTP binding;GO:0005886 plasma membrane;GO:0005886 plasma membrane;GO:0005886 plasma membrane;GO:0005886 plasma membrane;GO:0009817 "defense response to fungus, incompatible interaction";GO:0009845 seed germination;GO:0010541 acropetal auxin transport;GO:0048527 lateral root development
Pp1s39_424V6	2.38395	2.79216	3.39887	6.95744		173	190	315	4192	5.21965	6.92665	10.5478	124.279	PF00466,PF00428	PTHR21141	KOG0815		K02941	AT2G40010.1		Ribosomal protein L10 family protein				Ribosome	GO:0003735 structural constituent of ribosome;GO:0003735 structural constituent of ribosome;GO:0005840 ribosome;GO:0006412 translation;GO:0006414 translational elongation;GO:0006414 translational elongation;GO:0042254 ribosome biogenesis;GO:0022626 cytosolic ribosome
Pp1s39_81V6	0.119249	0.579854	-2.90033	2.80053		36	41	4	235	1.08617	1.4947	0.133941	6.96698	PF01776	PTHR10064	KOG3434			AT3G05560.3		Ribosomal L22e protein family					GO:0003735 structural constituent of ribosome;GO:0003735 structural constituent of ribosome;GO:0003735 structural constituent of ribosome;GO:0005840 ribosome;GO:0006412 translation;GO:0006412 translation;GO:0006412 translation;GO:0005730 nucleolus;GO:0005730 nucleolus;GO:0022626 cytosolic ribosome;GO:0022626 cytosolic ribosome;GO:0022626 cytosolic ribosome;GO:0022626 cytosolic ribosome;GO:0022626…
Pp1s391_65V6	-1.59124	-0.970344	-2.31537	1.6922		11	14	6	109	0.331885	0.510385	0.200911	3.23149						AT3G04020.1							GO:0003674 molecular_function;GO:0005575 cellular_component;GO:0008150 biological_process
Pp1s391_72V6	0.341641	1.45112	-1.73041	3.4554		42	75	9	370	1.2672	2.7342	0.301367	10.9693	PF00098	PTHR23002	KOG4400			AT1G75560.1		zinc knuckle (CCHC-type) family protein					GO:0003676 nucleic acid binding;GO:0003676 nucleic acid binding;GO:0003676 nucleic acid binding;GO:0008150 biological_process;GO:0008270 zinc ion binding;GO:0008270 zinc ion binding
Pp1s4_432V6	-0.591245	-3.7777	-0.730408	2.16242		22	2	18	151	0.66377	0.0729121	0.602733	4.47666	PF11927	PTHR22915:SF2
Pp1s40_188V6	-1.46571	-1.7777	-1.4409	2.44758		12	8	11	184	0.362056	0.291648	0.368337	5.455	PF00106	PTHR19410	KOG0725	1.1.1.100	K00059	AT1G63380.1		NAD(P)-binding Rossmann-fold superfamily protein					GO:0003824 catalytic activity;GO:0003824 catalytic activity;GO:0005488 binding;GO:0005488 binding;GO:0005575 cellular_component;GO:0008152 metabolic process;GO:0008152 metabolic process;GO:0016491 oxidoreductase activity;GO:0016491 oxidoreductase activity;GO:0016491 oxidoreductase activity;GO:0055114 oxidation-reduction process;GO:0055114 oxidation-reduction process
Pp1s40_200V6	-0.802749	-3.19274	1.42159	4.41587		19	3	80	720	0.573256	0.109368	2.67882	21.3456	PF00332					AT3G23770.1		O-Glycosyl hydrolases family 17 protein					GO:0003824 catalytic activity;GO:0004553 "hydrolase activity, hydrolyzing O-glycosyl compounds";GO:0004553 "hydrolase activity, hydrolyzing O-glycosyl compounds";GO:0005975 carbohydrate metabolic process;GO:0012505 endomembrane system;GO:0043169 cation binding
Pp1s402_44V6	-0.802749	-0.777698	-3.31537	1.59644		19	16	3	102	0.573256	0.583297	0.100456	3.02397	PF02524,PF04508		KOG0018			AT2G26570.1	WEB1	Plant protein of unknown function (DUF827)					GO:0005886 plasma membrane;GO:0005515 protein binding;GO:0005829 cytosol;GO:0009903 chloroplast avoidance movement;GO:0009904 chloroplast accumulation movement
Pp1s41_177V6	1.89184	2.44147	1.00656	4.897		123	149	60	1005	3.71108	5.43195	2.00911	29.795		PTHR11699	KOG2451	1.5.1.12	K00294	AT5G62530.1	ALDH12A1	aldehyde dehydrogenase 12A1				Alanine, aspartate and glutamate metabolism;Arginine and proline metabolism;Metabolic pathways	GO:0004028 3-chloroallyl aldehyde dehydrogenase activity;GO:0003842 1-pyrroline-5-carboxylate dehydrogenase activity;GO:0003842 1-pyrroline-5-carboxylate dehydrogenase activity;GO:0005739 mitochondrion;GO:0006560 proline metabolic process;GO:0005739 mitochondrion;GO:0005739 mitochondrion;GO:0009507 chloroplast;GO:0010133 proline catabolic process to glutamate;GO:0009651 response to salt stress;GO…
Pp1s41_224V6	3.44518	2.92966	0.144061	5.72815		361	209	33	1788	10.8919	7.61931	1.10501	53.0083
Pp1s423_24V6	2.00461	1.37205	-1.31537	4.02468		133	71	12	549	4.01279	2.58838	0.401822	16.2761
Pp1s43_19V6	0.926604	1.37205	-0.81287	5.66717		63	71	17	1714	1.9008	2.58838	0.569248	50.8145	PF01055	PTHR22762	KOG1065			AT1G68560.1	XYL1	alpha-xylosidase 1					GO:0004553 "hydrolase activity, hydrolyzing O-glycosyl compounds";GO:0009044 "xylan 1,4-beta-xylosidase activity";GO:0009507 chloroplast;GO:0045493 xylan catabolic process;GO:0046556 alpha-N-arabinofuranosidase activity;GO:0005618 cell wall;GO:0048046 apoplast;GO:0009505 plant-type cell wall;GO:0009505 plant-type cell wall;GO:0046686 response to cadmium ion;GO:0010411 xyloglucan metabolic process…
Pp1s430_12V6	0.0367866	-0.254137	0.827587	3.35028		34	23	53	344	1.02583	0.838489	1.77471	10.1985	PF00069	PTHR11909	KOG1163	2.7.11.1	K02218	AT1G72710.1	CKL2	casein kinase 1-like protein 2					GO:0004672 protein kinase activity;GO:0004674 protein serine/threonine kinase activity;GO:0005524 ATP binding;GO:0016301 kinase activity;GO:0005634 nucleus;GO:0005737 cytoplasm;GO:0005886 plasma membrane
Pp1s44_277V6	5.82507	7.39847	5.00053	9.8035		1879	4628	956	30142	56.692	168.719	32.0118	893.612	PF00080	PTHR10003	KOG0441	1.15.1.1	K04565	AT1G08830.1	CSD1	copper/zinc superoxide dismutase 1				Peroxisome	GO:0005507 copper ion binding;GO:0005576 extracellular region;GO:0008270 zinc ion binding;GO:0019430 removal of superoxide radicals;GO:0005829 cytosol;GO:0006979 response to oxidative stress;GO:0046688 response to copper ion;GO:0010039 response to iron ion;GO:0005737 cytoplasm;GO:0009651 response to salt stress;GO:0010193 response to ozone;GO:0042742 defense response to bacterium;GO:0005829 cytos…
Pp1s458_12V6	0.158777	1.5077	1.00656	3.44365		37	78	60	367	1.11634	2.84357	2.00911	10.8803	PF03819					AT3G25400.1							GO:0003674 molecular_function;GO:0005575 cellular_component;GO:0008150 biological_process
Pp1s49_22V6	1.09907	1.39223	2.22895	4.27053		71	72	140	651	2.14217	2.62483	4.68793	19.3		PTHR19328				AT1G74790.1		catalytics					GO:0003824 catalytic activity;GO:0008150 biological_process;GO:0031225 anchored to membrane;GO:0031225 anchored to membrane;GO:0031225 anchored to membrane;GO:0046658 anchored to plasma membrane;GO:0005886 plasma membrane;GO:0005886 plasma membrane
Pp1s494_12V6	-2.72875	-2.45577	-3.32193	1.96841		5	5	0	132	0.150857	0.18228	0	3.91337
Pp1s50_114V6	1.88006	2.39223	0.491984	4.75532		122	144	42	911	3.68091	5.24967	1.40638	27.0082	PF04144	PTHR10687	KOG3088			AT1G61250.1	SC3	secretory carrier 3					GO:0015031 protein transport;GO:0015031 protein transport;GO:0022857 transmembrane transporter activity;GO:0005886 plasma membrane;GO:0005886 plasma membrane;GO:0005886 plasma membrane;GO:0016020 membrane;GO:0005829 cytosol
Pp1s52_149V6	-0.527114	0.266696	-1.4409	2.79438		23	33	11	234	0.693941	1.20305	0.368337	6.93733	PF02391	PTHR23404	KOG3307	2.-.-.-	K03635	AT2G43760.1		molybdopterin biosynthesis MoaE family protein				Folate biosynthesis;Metabolic pathways;Sulfur relay system	GO:0003674 molecular_function;GO:0005575 cellular_component;GO:0006777 Mo-molybdopterin cofactor biosynthetic process;GO:0006777 Mo-molybdopterin cofactor biosynthetic process;GO:0006777 Mo-molybdopterin cofactor biosynthetic process;GO:0006777 Mo-molybdopterin cofactor biosynthetic process
Pp1s53_111V6	3.42506	4.31241	-0.508016	6.2386		356	545	21	2547	10.741	19.8685	0.703189	75.5102	PF00586,PF02769	PTHR10520		6.3.3.1	K01933	AT3G55010.2	PUR5	phosphoribosylformylglycinamidine cyclo-ligase, chloroplast / phosphoribosyl-aminoimidazole synthetase / AIR synthase (PUR5)				Purine metabolism;Metabolic pathways;Biosynthesis of secondary metabolites	GO:0004641 phosphoribosylformylglycinamidine cyclo-ligase activity;GO:0005524 ATP binding;GO:0005524 ATP binding;GO:0005739 mitochondrion;GO:0005739 mitochondrion;GO:0009507 chloroplast;GO:0009507 chloroplast;GO:0005507 copper ion binding;GO:0004641 phosphoribosylformylglycinamidine cyclo-ligase activity;GO:0006164 purine nucleotide biosynthetic process;GO:0004641 phosphoribosylformylglycinamidin…
Pp1s53_178V6	-2.24332	-0.607773	-2.31537	2.14318		7	18	6	149	0.2112	0.656209	0.200911	4.41736
Pp1s53_227V6	-0.591245	0.129192	-0.0929782	2.4554		22	30	28	185	0.66377	1.09368	0.937585	5.48464	PF10275	PTHR12931	KOG3991	3.4.-.-	K09602	AT1G28120.1							GO:0003674 molecular_function;GO:0005575 cellular_component;GO:0008150 biological_process
Pp1s55_50V6	2.08887	1.7301	0.654256	4.11631		141	91	47	585	4.25416	3.3175	1.5738	17.3433	PF08263,PF00560	PTHR23258				AT3G25560.3	NIK2	NSP-interacting kinase 2					GO:0004672 protein kinase activity;GO:0004672 protein kinase activity;GO:0004672 protein kinase activity;GO:0004672 protein kinase activity;GO:0004674 protein serine/threonine kinase activity;GO:0004674 protein serine/threonine kinase activity;GO:0004674 protein serine/threonine kinase activity;GO:0005524 ATP binding;GO:0005524 ATP binding;GO:0005524 ATP binding;GO:0006468 protein phosphorylation…
Pp1s6_199V6	-0.00628214	0.745863	0.0996669	4.1814		33	46	32	612	0.995655	1.67698	1.07153	18.1438	PF05832	PTHR13019				AT1G09330.1							GO:0003674 molecular_function;GO:0008150 biological_process
Pp1s6_359V6	1.44118	2.28839	3.03631	6.49387		90	134	245	3040	2.71542	4.88511	8.20387	90.126	PF08450,PF01436	PTHR10907
Pp1s64_210V6	-1.35024	-0.45577	1.18713	3.6175		13	20	68	414	0.392228	0.729121	2.27699	12.2737	PF00581					AT3G59780.1		Rhodanese/Cell cycle control phosphatase superfamily protein					GO:0003674 molecular_function;GO:0008150 biological_process;GO:0005634 nucleus;GO:0009507 chloroplast;GO:0009507 chloroplast
Pp1s66_115V6	-0.465714	1.57985	0.269592	4.08389		24	82	36	572	0.724113	2.98939	1.20547	16.9579	PF00403	PTHR22814	KOG1603			AT5G02600.2		Heavy metal transport/detoxification superfamily protein					GO:0030001 metal ion transport;GO:0046872 metal ion binding;GO:0005634 nucleus;GO:0005737 cytoplasm;GO:0009908 flower development;GO:0010015 root morphogenesis;GO:0010233 phloem transport;GO:0046872 metal ion binding;GO:0055078 sodium ion homeostasis
Pp1s67_154V6	-2.05068	-0.777698	0.684629	3.45149		8	16	48	369	0.241371	0.583297	1.60729	10.9396	PF02431					AT1G53520.1		Chalcone-flavanone isomerase family protein					GO:0009813 flavonoid biosynthetic process;GO:0016872 intramolecular lyase activity;GO:0042398 cellular modified amino acid biosynthetic process;GO:0045430 chalcone isomerase activity;GO:0009507 chloroplast;GO:0009570 chloroplast stroma
Pp1s7_313V6	-0.295789	0.648566	1.49198	3.45929		27	43	84	371	0.814627	1.56761	2.81276	10.9989	PF00501	PTHR11968	KOG1176			AT1G20560.1	AAE1	acyl activating enzyme 1					GO:0008152 metabolic process;GO:0008152 metabolic process;GO:0016208 AMP binding;GO:0005777 peroxisome
Pp1s7_53V6	2.149	2.1765	1.28949	4.21864		147	124	73	628	4.43519	4.52055	2.44442	18.6181	PF00332					AT1G30080.1		Glycosyl hydrolase superfamily protein					GO:0003824 catalytic activity;GO:0004553 "hydrolase activity, hydrolyzing O-glycosyl compounds";GO:0004553 "hydrolase activity, hydrolyzing O-glycosyl compounds";GO:0005975 carbohydrate metabolic process;GO:0012505 endomembrane system;GO:0043169 cation binding
Pp1s71_240V6	-3.32193	-3.32193	-3.32193	2.09394		0	0	0	144	0	0	0	4.26913	PF00514,PF02985,PF00168	PTHR23315	KOG0166			AT2G22125.1	CSI1	binding					GO:0005488 binding;GO:0008150 biological_process;GO:0005886 plasma membrane;GO:0005829 cytosol
Pp1s72_266V6	2.52675	3.43175	1.66952	5.42884		191	296	95	1453	5.76273	10.791	3.18109	43.0767	PF00400	PTHR22847	KOG0265		K12857	AT2G43770.1		Transducin/WD40 repeat-like superfamily protein				Spliceosome	GO:0000166 nucleotide binding;GO:0005834 heterotrimeric G-protein complex;GO:0008150 biological_process;GO:0080008 CUL4 RING ubiquitin ligase complex;GO:0080008 CUL4 RING ubiquitin ligase complex
Pp1s81_78V6	-3.32193	-3.32193	-3.32193	1.79438		0	0	0	117	0	0	0	3.46867	PF00487	PTHR19353	KOG4232			AT4G30950.1	FAD6	fatty acid desaturase 6				Biosynthesis of unsaturated fatty acids	GO:0010205 photoinhibition;GO:0009941 chloroplast envelope;GO:0009941 chloroplast envelope;GO:0006633 fatty acid biosynthetic process;GO:0009507 chloroplast;GO:0045485 omega-6 fatty acid desaturase activity;GO:0009507 chloroplast
Pp1s83_10V6	-3.32193	-2.19274	-2.57841	2.82488		0	6	5	239	0	0.218736	0.167426	7.08557
Pp1s88_37V6	1.47289	1.24467	-0.0929782	3.43972		92	65	28	366	2.77577	2.36964	0.937585	10.8507	PF00637,PF12451	PTHR23323	KOG2114			AT2G05170.1	VPS11	vacuolar protein sorting 11					GO:0005215 transporter activity;GO:0005488 binding;GO:0008270 zinc ion binding;GO:0007033 vacuole organization;GO:0009705 plant-type vacuole membrane
Pp1s89_173V6	-0.243321	-0.529771	-1.57841	2.53135		28	19	10	195	0.844798	0.692665	0.334852	5.78111	PF02037	PTHR14127			K12875	AT4G39680.1		SAP domain-containing protein				RNA transport;mRNA surveillance pathway;Spliceosome	GO:0003676 nucleic acid binding;GO:0003676 nucleic acid binding;GO:0003677 DNA binding;GO:0005634 nucleus;GO:0008150 biological_process;GO:0009507 chloroplast;GO:0005829 cytosol
Pp1s9_107V6	-0.0506763	-0.385381	-3.90033	4.01413		32	21	2	545	0.965484	0.765577	0.0669704	16.1575	PF00724	PTHR22893	KOG0134	1.3.1.42	K05894	AT1G76690.1	OPR2	12-oxophytodienoate reductase 2				alpha-Linolenic acid metabolism;Metabolic pathways	GO:0009611 response to wounding;GO:0009695 jasmonic acid biosynthetic process;GO:0016629 12-oxophytodienoate reductase activity
Pp1s9_379V6	0.831967	0.807264	1.36645	4.93245		59	48	77	1030	1.78011	1.74989	2.57836	30.5361	PF05047	PTHR12878	KOG3446	1.6.5.3,1.6.99.3	K03946	AT5G47890.1		NADH-ubiquinone oxidoreductase B8 subunit, putative				Oxidative phosphorylation;Metabolic pathways	GO:0005739 mitochondrion;GO:0008150 biological_process;GO:0016655 "oxidoreductase activity, acting on NADH or NADPH, quinone or similar compound as acceptor";GO:0005747 mitochondrial respiratory chain complex I
Pp1s91_241V6	-0.465714	0.129192	0.18713	4.27937		24	30	34	655	0.724113	1.09368	1.1385	19.4186	PF00249	PTHR21717:SF7				AT5G58340.2		myb-like HTH transcriptional regulator family protein					GO:0003677 DNA binding;GO:0003677 DNA binding;GO:0006355 "regulation of transcription, DNA-dependent";GO:0006355 "regulation of transcription, DNA-dependent"
Pp1s92_91V6	-1.05068	0.129192	-1.09298	3.51647		16	30	14	386	0.482742	1.09368	0.468793	11.4436	PF02985	PTHR18460				AT1G79190.1		ARM repeat superfamily protein					GO:0005488 binding;GO:0005575 cellular_component;GO:0008150 biological_process
Pp1s94_105V6	-0.0964799	-0.022811	-0.652406	2.58935		31	27	19	203	0.935312	0.984313	0.636219	6.01828	PF01649					AT3G15190.1		chloroplast 30S ribosomal protein S20, putative					GO:0003723 RNA binding;GO:0003735 structural constituent of ribosome;GO:0003735 structural constituent of ribosome;GO:0005840 ribosome;GO:0006412 translation;GO:0006412 translation;GO:0042254 ribosome biogenesis;GO:0009507 chloroplast;GO:0009570 chloroplast stroma;GO:0016020 membrane;GO:0009507 chloroplast;GO:0009570 chloroplast stroma
Pp1s95_118V6	0.90352	2.12919	2.60746	5.01545		62	120	182	1091	1.87062	4.37472	6.0943	32.3446						AT5G28960.1							GO:0003674 molecular_function;GO:0008150 biological_process;GO:0012505 endomembrane system
Pp1s97_91V6	-1.88075	-0.254137	-2.09298	1.80666		9	23	7	118	0.271542	0.838489	0.234396	3.49831	PF03081	PTHR12542	KOG2344		K07195	AT4G31540.1	EXO70G1	exocyst subunit exo70 family protein G1					GO:0000145 exocyst;GO:0006887 exocytosis;GO:0006904 vesicle docking involved in exocytosis;GO:0005829 cytosol
Pp1s98_53V6	0.534286	1.2667	0.907022	3.5424		48	66	56	393	1.44823	2.4061	1.87517	11.6512
Pp1s1_207V6	0.730683	-2.7777	0.881027	2.87821		55	4	55	248	1.65943	0.145824	1.84169	7.35239	PF06351			5.3.99.6	K10525	AT3G25780.1	AOC3	allene oxide cyclase 3				alpha-Linolenic acid metabolism;Metabolic pathways	GO:0009695 jasmonic acid biosynthetic process;GO:0046423 allene-oxide cyclase activity;GO:0005886 plasma membrane;GO:0005774 vacuolar membrane;GO:0016020 membrane;GO:0009651 response to salt stress;GO:0009620 response to fungus
Pp1s1_95V6	-0.243321	-0.607773	-3.32193	2.07376		28	18	0	142	0.844798	0.656209	0	4.20983	PF06911	PTHR21068				AT4G35985.1		Senescence/dehydration-associated protein-related
Pp1s10_205V6	2.53429	2.56215	3.04803	4.98741		192	162	247	1070	5.7929	5.90588	8.27084	31.722	PF00071,PF08477	PTHR11708	KOG0096		K07936	AT5G55190.1	RAN3	RAN GTPase 3				Ribosome biogenesis in eukaryotes;RNA transport	GO:0005525 GTP binding;GO:0005829 cytosol;GO:0003924 GTPase activity;GO:0005515 protein binding;GO:0005525 GTP binding;GO:0006606 protein import into nucleus
Pp1s10_301V6	0.59318	0.648566	-1.19989	3.32062		50	43	13	337	1.50857	1.56761	0.435307	9.99095						AT2G44820.2							GO:0003674 molecular_function;GO:0005575 cellular_component;GO:0008150 biological_process
Pp1s10_9V6	-1.59124	-3.19274	-1.31537	2.00083		11	3	12	135	0.331885	0.109368	0.401822	4.00231	PF02985,PF02178	PTHR12663	KOG1525		K11267	AT5G47690.2		binding					GO:0005488 binding;GO:0005488 binding;GO:0005488 binding;GO:0008150 biological_process;GO:0005739 mitochondrion;GO:0009507 chloroplast;GO:0005634 nucleus;GO:0005829 cytosol;GO:0005829 cytosol;GO:0005829 cytosol
Pp1s106_65V6	0.197251	0.351585	-1.09298	2.31633		38	35	14	168	1.14651	1.27596	0.468793	4.98065	PF03016	PTHR11062	KOG1021			AT3G45400.1		exostosin family protein					GO:0003824 catalytic activity;GO:0008150 biological_process;GO:0012505 endomembrane system;GO:0016020 membrane;GO:0016020 membrane
Pp1s11_60V6	1.98275	1.99049	0.684629	4.94222		131	109	48	1037	3.95245	3.97371	1.60729	30.7437	PF02178,PF03479					AT4G12080.1	AHL1	AT-hook motif nuclear-localized protein 1					GO:0003677 DNA binding;GO:0003677 DNA binding;GO:0005739 mitochondrion;GO:0005634 nucleus;GO:0005730 nucleolus;GO:0005737 cytoplasm
Pp1s114_179V6	-2.05068	-1.31827	-2.31537	2.65873		8	11	6	213	0.241371	0.401016	0.200911	6.31475
Pp1s114_7V6	-0.527114	-0.0772588	-2.57841	3.00083		23	26	5	270	0.693941	0.947857	0.167426	8.00462	PF07690,PF00854	PTHR11654	KOG1237			AT3G54140.1	PTR1	peptide transporter 1					GO:0005215 transporter activity;GO:0005215 transporter activity;GO:0006857 oligopeptide transport;GO:0016020 membrane;GO:0005886 plasma membrane;GO:0005886 plasma membrane;GO:0042936 dipeptide transporter activity;GO:0042936 dipeptide transporter activity;GO:0042937 tripeptide transporter activity;GO:0042938 dipeptide transport;GO:0042939 tripeptide transport;GO:0005886 plasma membrane;GO:0005886…
Pp1s118_236V6	-1.05068	0.309764	-0.993443	2.3249		16	34	15	169	0.482742	1.23951	0.502278	5.0103	PF11209
Pp1s121_167V6	0.730683	0.807264	-3.32193	4.8036		55	48	0	942	1.65943	1.74989	0	27.9272	PF00069	PTHR11295	KOG0659			AT4G28980.1	CAK1AT	CDK-activating kinase 1AT					GO:0016301 kinase activity;GO:0010078 maintenance of root meristem identity;GO:0005634 nucleus;GO:0005737 cytoplasm;GO:0000079 regulation of cyclin-dependent protein kinase activity;GO:0004674 protein serine/threonine kinase activity;GO:0005515 protein binding;GO:0005515 protein binding;GO:0005515 protein binding;GO:0005515 protein binding;GO:0005829 cytosol;GO:0006468 protein phosphorylation;GO:…
Pp1s123_81V6	-0.465714	0.266696	-0.440902	2.54607		24	33	22	197	0.724113	1.20305	0.736674	5.8404	PF00646,PF07646,PF01344	PTHR23230				AT3G63220.2		Galactose oxidase/kelch repeat superfamily protein					GO:0003674 molecular_function;GO:0008150 biological_process
Pp1s125_64V6	1.21611	1.19958	-0.256477	3.73137		77	63	25	448	2.3232	2.29673	0.83713	13.2817	PF00076,PF05391	PTHR23269	KOG0128			AT4G24270.2	EMB140	EMBRYO DEFECTIVE 140					GO:0000166 nucleotide binding;GO:0000166 nucleotide binding;GO:0003676 nucleic acid binding;GO:0003676 nucleic acid binding;GO:0003723 RNA binding;GO:0005622 intracellular;GO:0005622 intracellular;GO:0009793 embryo development ending in seed dormancy
Pp1s126_141V6	2.00461	1.99049	1.50906	4.40783		133	109	85	716	4.01279	3.97371	2.84624	21.2271	PF00140,PF04542,PF04539,PF04545					AT1G64860.1	SIGA	sigma factor A					GO:0003677 DNA binding;GO:0003700 sequence-specific DNA binding transcription factor activity;GO:0003899 DNA-directed RNA polymerase activity;GO:0006355 "regulation of transcription, DNA-dependent";GO:0009507 chloroplast;GO:0005515 protein binding;GO:0006352 "transcription initiation, DNA-dependent";GO:0016987 sigma factor activity
Pp1s128_127V6	-0.0506763	3.69803	2.59951	5.97523		32	356	181	2122	0.965484	12.9783	6.06082	62.9103	PF08240,PF00107	PTHR11695	KOG1198			AT4G21580.1		oxidoreductase, zinc-binding dehydrogenase family protein					GO:0003824 catalytic activity;GO:0003824 catalytic activity;GO:0003824 catalytic activity;GO:0005488 binding;GO:0005488 binding;GO:0005488 binding;GO:0008152 metabolic process;GO:0008152 metabolic process;GO:0008152 metabolic process;GO:0008270 zinc ion binding;GO:0008270 zinc ion binding;GO:0008270 zinc ion binding;GO:0008270 zinc ion binding;GO:0016491 oxidoreductase activity;GO:0016491 oxidore…
Pp1s135_28V6	-1.24332	-0.777698	-0.993443	2.47091		14	16	15	187	0.422399	0.583297	0.502278	5.54394	PF06725	PTHR21666:SF3
Pp1s138_36V6	1.23473	1.7301	1.45722	4.62965		78	91	82	835	2.35337	3.3175	2.74579	24.755	PF00076,PF08662	PTHR14068	KOG2314		K03253	AT5G25780.1	EIF3B-2	eukaryotic translation initiation factor 3B-2				RNA transport	GO:0003676 nucleic acid binding;GO:0003743 translation initiation factor activity;GO:0006413 translational initiation;GO:0003743 translation initiation factor activity;GO:0005515 protein binding;GO:0005737 cytoplasm;GO:0003743 translation initiation factor activity;GO:0005634 nucleus;GO:0005829 cytosol;GO:0005829 cytosol
Pp1s14_47V6	-3.32193	-3.7777	-1.57841	1.85475		0	2	10	122	0	0.0729121	0.334852	3.6169						AT2G26770.2		plectin-related					GO:0003674 molecular_function;GO:0005575 cellular_component;GO:0008150 biological_process
Pp1s147_88V6	-2.24332	-0.318267	-2.09298	1.73137		7	22	7	112	0.2112	0.802033	0.234396	3.32043					K10886	AT3G23100.1	XRCC4	homolog of human DNA ligase iv-binding protein XRCC4				Non-homologous end-joining	GO:0005634 nucleus;GO:0005634 nucleus;GO:0006302 double-strand break repair;GO:0006302 double-strand break repair;GO:0006310 DNA recombination;GO:0006310 DNA recombination;GO:0008152 metabolic process;GO:0008152 metabolic process;GO:0008022 protein C-terminus binding
Pp1s150_91V6	-0.350237	-0.385381	-0.993443	1.95744		26	21	15	131	0.784455	0.765577	0.502278	3.88372						AT3G52860.1							GO:0003674 molecular_function;GO:0008150 biological_process
Pp1s152_51V6	0.534286	0.614619	-1.57841	2.67221		48	42	10	215	1.44823	1.53115	0.334852	6.37405	PF03029	PTHR21231	KOG1533		K06883	AT5G22370.1	QQT1	P-loop containing nucleoside triphosphate hydrolases superfamily protein					GO:0000166 nucleotide binding;GO:0000166 nucleotide binding;GO:0005524 ATP binding;GO:0009793 embryo development ending in seed dormancy;GO:0005874 microtubule;GO:0009790 embryo development;GO:0051301 cell division
Pp1s156_55V6	0.0367866	0.977189	-0.578405	3.20942		34	54	20	312	1.02583	1.96863	0.669704	9.24978	PF03357	PTHR10476	KOG3230			AT1G03950.1	VPS2.3	vacuolar protein sorting-associated protein 2.3					GO:0016192 vesicle-mediated transport;GO:0000815 ESCRT III complex
Pp1s157_50V6	-0.0506763	2.81476	-0.0929782	5.45345		32	193	28	1478	0.965484	7.03601	0.937585	43.8179	PF03405			1.14.19.2	K03921	AT2G43710.2	SSI2	Plant stearoyl-acyl-carrier-protein desaturase family protein				Fatty acid biosynthesis;Biosynthesis of unsaturated fatty acids	GO:0004768 stearoyl-CoA 9-desaturase activity;GO:0006631 fatty acid metabolic process;GO:0006952 defense response;GO:0009695 jasmonic acid biosynthetic process;GO:0045300 acyl-[acyl-carrier-protein] desaturase activity;GO:0008610 lipid biosynthetic process;GO:0045300 acyl-[acyl-carrier-protein] desaturase activity;GO:0042742 defense response to bacterium;GO:0009570 chloroplast stroma;GO:0006636 u…
Pp1s164_49V6	2.67724	2.98385	4.13309	6.43972		212	217	524	2928	6.39633	7.91096	17.5462	86.8056	PF10067
Pp1s166_109V6	-0.295789	0.176498	-2.90033	3.36696		27	31	4	348	0.814627	1.13014	0.133941	10.3171						AT3G15820.1	ROD1	phosphatidic acid phosphatase-related / PAP2-related					GO:0004142 diacylglycerol cholinephosphotransferase activity;GO:0046470 phosphatidylcholine metabolic process
Pp1s171_102V6	2.6288	4.23911	2.31884	6.70579		205	518	149	3521	6.18513	18.8842	4.98929	104.386
Pp1s173_144V6	0.0786068	1.52608	-3.90033	3.79438		35	79	2	468	1.056	2.88003	0.0669704	13.8747	PF02374	PTHR10803	KOG2825	3.6.3.16	K01551	AT1G01910.1		P-loop containing nucleoside triphosphate hydrolases superfamily protein					GO:0005524 ATP binding;GO:0005524 ATP binding;GO:0005524 ATP binding;GO:0005524 ATP binding;GO:0005524 ATP binding;GO:0006820 anion transport;GO:0006875 cellular metal ion homeostasis;GO:0006875 cellular metal ion homeostasis;GO:0006875 cellular metal ion homeostasis;GO:0006875 cellular metal ion homeostasis;GO:0016020 membrane
Pp1s18_125V6	-0.880751	-3.7777	-0.145446	2.53873		18	2	27	196	0.543085	0.0729121	0.9041	5.81076						AT5G15710.1		Galactose oxidase/kelch repeat superfamily protein					GO:0003674 molecular_function;GO:0008150 biological_process
Pp1s185_2V6	3.44118	4.49376	2.24941	6.62402		360	618	142	3327	10.8617	22.5298	4.7549	98.6346	PF00462	PTHR10168	KOG1752		K03676	AT5G20500.1		Glutaredoxin family protein					GO:0008794 arsenate reductase (glutaredoxin) activity;GO:0009055 electron carrier activity;GO:0015035 protein disulfide oxidoreductase activity;GO:0045454 cell redox homeostasis
Pp1s19_137V6	-3.05068	-2.7777	-1.90033	1.87821		4	4	8	124	0.120685	0.145824	0.267882	3.67619	PF00069,PF07714,PF01419	PTHR23257	KOG0192			AT1G64300.2		Protein kinase family protein					GO:0006468 protein phosphorylation;GO:0006468 protein phosphorylation;GO:0016301 kinase activity;GO:0004712 protein serine/threonine/tyrosine kinase activity
Pp1s191_80V6	-1.46571	-0.133842	-1.90033	1.9793		12	25	8	133	0.362056	0.911401	0.267882	3.94301	PF09759	PTHR13255	KOG2676			AT4G00231.1	MEE50	ARM repeat superfamily protein					GO:0005488 binding;GO:0009793 embryo development ending in seed dormancy
Pp1s195_15V6	-1.35024	-0.529771	0.269592	5.75532		13	19	36	1822	0.392228	0.692665	1.20547	54.0163	PF00364	PTHR18866:SF1				AT3G15690.2		Single hybrid motif superfamily protein					GO:0009507 chloroplast;GO:0009507 chloroplast
Pp1s197_114V6	-1.14379	-0.970344	-1.57841	2.13347		15	14	10	148	0.45257	0.510385	0.334852	4.38772	PF02985	PTHR10648	KOG0211		K03456	AT3G25800.1	PP2AA2	protein phosphatase 2A subunit A2				mRNA surveillance pathway	GO:0046686 response to cadmium ion;GO:0046686 response to cadmium ion;GO:0005886 plasma membrane;GO:0005886 plasma membrane;GO:0005829 cytosol;GO:0005829 cytosol;GO:0008601 protein phosphatase type 2A regulator activity;GO:0008601 protein phosphatase type 2A regulator activity;GO:0042325 regulation of phosphorylation
Pp1s198_153V6	1.78221	2.23353	0.18713	4.18376		114	129	34	613	3.43954	4.70283	1.1385	18.1734	PF02096	PTHR12428	KOG1239		K03217	AT2G28800.1	ALB3	63 kDa inner membrane family protein				Protein export	GO:0009535 chloroplast thylakoid membrane;GO:0015450 P-P-bond-hydrolysis-driven protein transmembrane transporter activity;GO:0045038 protein import into chloroplast thylakoid membrane;GO:0005515 protein binding;GO:0005515 protein binding;GO:0009535 chloroplast thylakoid membrane;GO:0009535 chloroplast thylakoid membrane;GO:0009535 chloroplast thylakoid membrane;GO:0009535 chloroplast thylakoid m…
Pp1s199_17V6	2.03679	2.67351	2.71438	4.7378		136	175	196	900	4.10331	6.37981	6.5631	26.6821	PF00380	PTHR21569	KOG1753		K02960	AT5G18380.1		Ribosomal protein S5 domain 2-like superfamily protein				Ribosome	GO:0003735 structural constituent of ribosome;GO:0006412 translation;GO:0022627 cytosolic small ribosomal subunit;GO:0022627 cytosolic small ribosomal subunit;GO:0009507 chloroplast;GO:0009507 chloroplast
Pp1s21_330V6	-2.24332	0.176498	-3.32193	2.12369		7	31	0	147	0.2112	1.13014	0	4.35807	PF07714,PF00069	PTHR23258	KOG1187			AT5G54380.1	THE1	protein kinase family protein					GO:0016301 kinase activity;GO:0005886 plasma membrane;GO:0005886 plasma membrane;GO:0004672 protein kinase activity;GO:0005886 plasma membrane;GO:0046777 protein autophosphorylation;GO:0005886 plasma membrane;GO:0009742 brassinosteroid mediated signaling pathway;GO:0009791 post-embryonic development;GO:0051510 regulation of unidimensional cell growth;GO:0009741 response to brassinosteroid stimulu…
Pp1s215_5V6	-1.35024	-0.0772588	-0.256477	2.79438		13	26	25	234	0.392228	0.947857	0.83713	6.93733						AT3G55760.3							GO:0009507 chloroplast;GO:0009507 chloroplast;GO:0009570 chloroplast stroma;GO:0009507 chloroplast;GO:0009507 chloroplast;GO:0005515 protein binding
Pp1s223_23V6	-4.05068	-1.19274	-3.32193	3.13834		2	12	0	297	0.0603427	0.437472	0	8.80508						AT1G20970.1							GO:0003674 molecular_function;GO:0008150 biological_process;GO:0005773 vacuole;GO:0005886 plasma membrane;GO:0005829 cytosol
Pp1s232_64V6	-3.46571	3.58862	3.6427	6.15943		3	330	373	2411	0.0905141	12.0305	12.49	71.4783
Pp1s27_267V6	-2.72875	-3.32193	-0.652406	1.99011		5	0	19	134	0.150857	0	0.636219	3.97266	PF00033	PTHR19271	KOG4663		K02635	ATCG00720.1	PETB	photosynthetic electron transfer B					GO:0009512 cytochrome b6f complex;GO:0009579 thylakoid;GO:0019684 "photosynthesis, light reaction";GO:0020037 heme binding;GO:0009535 chloroplast thylakoid membrane;GO:0009535 chloroplast thylakoid membrane;GO:0009535 chloroplast thylakoid membrane;GO:0016020 membrane;GO:0009507 chloroplast;GO:0009579 thylakoid
Pp1s28_203V6	-3.05068	-0.529771	-3.31537	2.47091		4	19	3	187	0.120685	0.692665	0.100456	5.54394	PF00004	PTHR23070	KOG0743			AT4G25835.1		P-loop containing nucleoside triphosphate hydrolases superfamily protein					GO:0000166 nucleotide binding;GO:0005524 ATP binding;GO:0008150 biological_process;GO:0012505 endomembrane system;GO:0016887 ATPase activity;GO:0017111 nucleoside-triphosphatase activity
Pp1s29_55V6	1.39227	2.09267	0.59152	4.06101		87	117	45	563	2.62491	4.26536	1.50683	16.6911	PF01281	PTHR21368				AT5G53070.1		Ribosomal protein L9/RNase H1					GO:0003735 structural constituent of ribosome;GO:0003735 structural constituent of ribosome;GO:0005622 intracellular;GO:0005840 ribosome;GO:0005840 ribosome;GO:0006412 translation;GO:0006412 translation;GO:0042254 ribosome biogenesis
Pp1s31_106V6	0.621749	1.86616	-0.256477	4.13834		51	100	25	594	1.53874	3.6456	0.83713	17.6102	PF02348	PTHR21485				AT1G53000.1	KDSB	Nucleotide-diphospho-sugar transferases superfamily protein				Metabolic pathways	GO:0009103 lipopolysaccharide biosynthetic process;GO:0009103 lipopolysaccharide biosynthetic process;GO:0016779 nucleotidyltransferase activity;GO:0005739 mitochondrion;GO:0008690 3-deoxy-manno-octulosonate cytidylyltransferase activity
Pp1s31_129V6	-0.963213	0.266696	-2.31537	2.2369		17	33	6	159	0.512913	1.20305	0.200911	4.71383		PTHR16127				AT5G50840.2							GO:0008150 biological_process
Pp1s31_236V6	0.341641	1.89473	1.72902	4.29906		42	102	99	664	1.2672	3.71852	3.31503	19.6854	PF08423	PTHR22942	KOG1434		K04482	AT5G20850.1	RAD51	RAS associated with diabetes protein 51				Homologous recombination	GO:0000166 nucleotide binding;GO:0003677 DNA binding;GO:0003684 damaged DNA binding;GO:0003684 damaged DNA binding;GO:0005524 ATP binding;GO:0006281 DNA repair;GO:0008094 DNA-dependent ATPase activity;GO:0017111 nucleoside-triphosphatase activity;GO:0005515 protein binding;GO:0005515 protein binding;GO:0005515 protein binding;GO:0005634 nucleus;GO:0010332 response to gamma radiation;GO:0006302 do…
Pp1s319_5V6	-3.32193	-0.690236	-3.31537	2.782		0	17	3	232	0	0.619753	0.100456	6.87804	PF06369
Pp1s33_198V6	-3.05068	-0.318267	-2.09298	1.70538		4	22	7	110	0.120685	0.802033	0.234396	3.26114
Pp1s34_442V6	3.43716	3.64437	6.36176	8.70548		359	343	2456	14081	10.8315	12.5044	82.2396	417.456
Pp1s36_237V6	1.44118	2.63169	0.932557	4.6035		90	170	57	820	2.71542	6.19753	1.90866	24.3103	PF03016	PTHR11062	KOG1021			AT1G63450.1	RHS8	root hair specific 8					GO:0003824 catalytic activity;GO:0016020 membrane;GO:0016020 membrane
Pp1s378_11V6	1.09907	0.579854	3.41255	5.50239		71	41	318	1529	2.14217	1.4947	10.6483	45.3298	PF06351			5.3.99.6	K10525	AT3G25780.1	AOC3	allene oxide cyclase 3				alpha-Linolenic acid metabolism;Metabolic pathways	GO:0009695 jasmonic acid biosynthetic process;GO:0046423 allene-oxide cyclase activity;GO:0005886 plasma membrane;GO:0005774 vacuolar membrane;GO:0016020 membrane;GO:0009651 response to salt stress;GO:0009620 response to fungus
Pp1s381_25V6	0.782214	0.579854	2.88103	4.88691		57	41	220	998	1.71977	1.4947	7.36674	29.5874	PF06747	PTHR13344		1.6.5.3,1.6.99.3	K03952	AT3G06310.1		Cox19-like CHCH family protein				Oxidative phosphorylation;Metabolic pathways	GO:0006120 "mitochondrial electron transport, NADH to ubiquinone";GO:0008137 NADH dehydrogenase (ubiquinone) activity;GO:0005747 mitochondrial respiratory chain complex I;GO:0005747 mitochondrial respiratory chain complex I
Pp1s42_233V6	-3.32193	-0.777698	-1.31537	2.1908		0	16	12	154	0	0.583297	0.401822	4.5656						AT1G47980.1							GO:0003674 molecular_function;GO:0008150 biological_process;GO:0012505 endomembrane system
Pp1s53_43V6	-3.05068	-1.60777	-0.0929782	1.93524		4	9	28	129	0.120685	0.328104	0.937585	3.82443	PF01135,PF08241	PTHR11579	KOG1661			AT3G48330.1	PIMT1	protein-l-isoaspartate methyltransferase 1					GO:0004719 protein-L-isoaspartate (D-aspartate) O-methyltransferase activity;GO:0004719 protein-L-isoaspartate (D-aspartate) O-methyltransferase activity;GO:0004719 protein-L-isoaspartate (D-aspartate) O-methyltransferase activity;GO:0006464 protein modification process;GO:0005737 cytoplasm;GO:0007568 aging;GO:0009651 response to salt stress;GO:0009737 response to abscisic acid stimulus;GO:000984…

## Sheet: cluster-5
#Gene	0h (TPM)	24h (TPM)	48h (TPM)	72h (TPM)		0h	24h	48h	72h	0h (TPM)	24h (TPM)	48h (TPM)	72h (TPM)	PFAM	Panther	KOG	KEGG ec	KEGG Orthology	best arabidopsis TAIR10 hit name	best arabidopsis TAIR10 hit symbol	best arabidopsis TAIR10 hit defline	best rice hit name	best rice hit symbol	best rice hit defline	Pathway	Go_terms
Pp1s1_199V6	3.79795	2.63169	0.144061	4.43774		461	170	33	731	13.909	6.19753	1.10501	21.6718	PF00561	PTHR10992	KOG4178			AT4G12830.1		alpha/beta-Hydrolases superfamily protein					GO:0003824 catalytic activity;GO:0016787 hydrolase activity;GO:0009507 chloroplast
Pp1s1_361V6	3.34593	3.49376	3.19242	5.0801		337	309	273	1141	10.1677	11.2649	9.14146	33.8269
Pp1s1_489V6	3.10414	3.64437	0.144061	3.1908		285	343	33	308	8.59884	12.5044	1.10501	9.13119	PF00831	PTHR13872	KOG3436		K02918	AT5G02610.1		Ribosomal L29 family protein				Ribosome	GO:0003735 structural constituent of ribosome;GO:0003735 structural constituent of ribosome;GO:0003735 structural constituent of ribosome;GO:0005840 ribosome;GO:0006412 translation;GO:0006412 translation;GO:0006412 translation;GO:0042254 ribosome biogenesis;GO:0005886 plasma membrane;GO:0022626 cytosolic ribosome;GO:0005774 vacuolar membrane;GO:0022625 cytosolic large ribosomal subunit
Pp1s10_43V6	2.09907	3.68583	-1.31537	4.52764		142	353	12	778	4.28433	12.869	0.401822	23.0652	PF01425	PTHR11895	KOG1211			AT5G64440.1	FAAH	fatty acid amide hydrolase					GO:0004040 amidase activity;GO:0005773 vacuole;GO:0005783 endoplasmic reticulum;GO:0047412 N-(long-chain-acyl)ethanolamine deacylase activity;GO:0005774 vacuolar membrane;GO:0005886 plasma membrane;GO:0042742 defense response to bacterium
Pp1s10_47V6	2.72411	2.01672	0.684629	3.06867		219	111	48	283	6.60753	4.04662	1.60729	8.39002	PF07386					AT3G60810.1							GO:0003674 molecular_function;GO:0003674 molecular_function;GO:0005575 cellular_component;GO:0008150 biological_process
Pp1s101_62V6	4.43515	3.69803	0.18713	1.61052		717	356	34	103	21.6329	12.9783	1.1385	3.05361						AT1G49000.1							GO:0003674 molecular_function;GO:0008150 biological_process;GO:0009507 chloroplast
Pp1s101_74V6	4.53616	5.4463	5.48445	2.76951		769	1196	1337	230	23.2018	43.6014	44.7697	6.81875	PF00467,PF01777	PTHR10497				AT4G15000.1		Ribosomal L27e protein family				Ribosome	GO:0003735 structural constituent of ribosome;GO:0003735 structural constituent of ribosome;GO:0003735 structural constituent of ribosome;GO:0005622 intracellular;GO:0005840 ribosome;GO:0006412 translation;GO:0006412 translation;GO:0006412 translation;GO:0022626 cytosolic ribosome;GO:0022625 cytosolic large ribosomal subunit;GO:0005829 cytosol;GO:0005829 cytosol
Pp1s102_81V6	3.45712	6.69955	5.70607	4.63138		364	2851	1559	836	10.9824	103.936	52.2034	24.7847	PF05512					AT1G04560.1		AWPM-19-like family protein					GO:0003674 molecular_function;GO:0008150 biological_process;GO:0012505 endomembrane system
Pp1s102_88V6	3.00461	3.19385	4.54261	0.508979		266	251	696	48	8.02558	9.15046	23.3057	1.42304	PF01764	PTHR21493				AT2G42450.1		alpha/beta-Hydrolases superfamily protein					GO:0004806 triglyceride lipase activity;GO:0004806 triglyceride lipase activity;GO:0005739 mitochondrion;GO:0006629 lipid metabolic process;GO:0006629 lipid metabolic process
Pp1s103_67V6	2.73723	3.08028	4.29688	1.93524		221	232	587	129	6.66787	8.4578	19.6558	3.82443
Pp1s104_128V6	2.98824	3.66938	2.54261	5.18963		263	349	174	1231	7.93507	12.7232	5.82642	36.4951	PF03946,PF00298	PTHR11661	KOG0886		K02870	AT3G53430.1		Ribosomal protein L11 family protein				Ribosome	GO:0003735 structural constituent of ribosome;GO:0003735 structural constituent of ribosome;GO:0005840 ribosome;GO:0006412 translation;GO:0022625 cytosolic large ribosomal subunit;GO:0042254 ribosome biogenesis;GO:0016020 membrane;GO:0022625 cytosolic large ribosomal subunit;GO:0005515 protein binding;GO:0005829 cytosol
Pp1s104_200V6	5.70505	4.61462	0.144061	2.9013		1729	672	33	252	52.1663	24.4985	1.10501	7.47097
Pp1s104_210V6	4.87562	2.33083	2.54261	4.60701		973	138	174	822	29.3567	5.03093	5.82642	24.3696	PF01965	PTHR11019	KOG2764			AT3G02720.1		Class I glutamine amidotransferase-like superfamily protein					GO:0005575 cellular_component;GO:0008150 biological_process;GO:0016798 "hydrolase activity, acting on glycosyl bonds"
Pp1s105_41V6	2.51157	2.95701	1.68463	3.59997		189	213	96	409	5.70239	7.76514	3.21458	12.1255	PF00076	PTHR18847	KOG0121		K12883	AT5G44200.2	CBP20	CAP-binding protein 20				RNA transport;mRNA surveillance pathway;Spliceosome	GO:0003723 RNA binding;GO:0000339 RNA cap binding;GO:0016070 RNA metabolic process;GO:0005845 mRNA cap binding complex;GO:0000394 "RNA splicing, via endonucleolytic cleavage and ligation";GO:0031053 primary microRNA processing;GO:0005515 protein binding;GO:0005515 protein binding
Pp1s106_128V6	3.53429	3.98052	2.32849	4.94777		384	433	150	1041	11.5858	15.7855	5.02278	30.8622						AT1G56060.1							GO:0003674 molecular_function;GO:0005575 cellular_component;GO:0008150 biological_process
Pp1s106_16V6	1.23473	5.19385	2.75788	4.9793		78	1004	202	1064	2.35337	36.6019	6.76401	31.5441	PF00389,PF02826	PTHR10996	KOG0069	1.2.1.2	K00122	AT5G14780.1	FDH	formate dehydrogenase				Glyoxylate and dicarboxylate metabolism;Metabolic pathways	GO:0003824 catalytic activity;GO:0005488 binding;GO:0016616 "oxidoreductase activity, acting on the CH-OH group of donors, NAD or NADP as acceptor";GO:0048037 cofactor binding;GO:0051287 NAD or NADH binding;GO:0005739 mitochondrion;GO:0009507 chloroplast;GO:0009611 response to wounding;GO:0009579 thylakoid;GO:0005739 mitochondrion;GO:0009507 chloroplast;GO:0046686 response to cadmium ion;GO:00057…
Pp1s109_101V6	5.67298	5.25159	3.32367	5.54607		1691	1045	299	1576	51.0198	38.0966	10.0121	46.7232	PF02162
Pp1s109_241V6	5.46009	4.14116	6.46872	2.91837		1459	484	2645	255	44.02	17.6447	88.5683	7.55991	PF01070	PTHR10578	KOG0538			AT4G18360.1		Aldolase-type TIM barrel family protein				Glyoxylate and dicarboxylate metabolism;Metabolic pathways;Peroxisome	GO:0003824 catalytic activity;GO:0003824 catalytic activity;GO:0008152 metabolic process;GO:0008152 metabolic process;GO:0008891 glycolate oxidase activity;GO:0010181 FMN binding;GO:0010181 FMN binding;GO:0016491 oxidoreductase activity;GO:0016491 oxidoreductase activity;GO:0055114 oxidation-reduction process;GO:0055114 oxidation-reduction process;GO:0005777 peroxisome;GO:0005777 peroxisome;GO:00…
Pp1s109_63V6	5.28806	3.66109	0.269592	1.8898		1295	347	36	125	39.0719	12.6502	1.20547	3.70584	PF05794	PTHR12832	KOG1981			AT1G22930.1		T-complex protein 11					GO:0008150 biological_process
Pp1s109_92V6	-0.658359	5.81289	7.0972	4.07122		21	1542	4089	567	0.633599	56.2152	136.921	16.8097
Pp1s109_97V6	3.45712	3.2667	4.98536	2.6922		364	264	946	218	10.9824	9.62439	31.677	6.46299	PF00034	PTHR11961	KOG3453			AT1G22840.1	CYTC-1	CYTOCHROME C-1					GO:0009055 electron carrier activity;GO:0005739 mitochondrion;GO:0008283 cell proliferation;GO:0005774 vacuolar membrane;GO:0005774 vacuolar membrane;GO:0005507 copper ion binding;GO:0005829 cytosol
Pp1s111_161V6	5.42303	5.24328	0.854554	6.18552		1422	1039	54	2455	42.9037	37.8778	1.8082	72.7827	PF00171	PTHR11699	KOG2450			AT1G79440.1	ALDH5F1	aldehyde dehydrogenase 5F1				Alanine, aspartate and glutamate metabolism;Tyrosine metabolism;Butanoate metabolism;Metabolic pathways	GO:0004028 3-chloroallyl aldehyde dehydrogenase activity;GO:0004777 succinate-semialdehyde dehydrogenase activity;GO:0004777 succinate-semialdehyde dehydrogenase activity;GO:0005759 mitochondrial matrix;GO:0006540 glutamate decarboxylation to succinate;GO:0009450 gamma-aminobutyric acid catabolic process;GO:0051287 NAD or NADH binding;GO:0005739 mitochondrion;GO:0006950 response to stress;GO:0009…
Pp1s111_165V6	4.50007	1.33083	1.30912	2.6035		750	69	74	205	22.6285	2.51547	2.4779	6.07758	PF05605					AT3G05700.1		Drought-responsive family protein					GO:0009414 response to water deprivation
Pp1s114_203V6	2.56403	2.57103	2.01853	4.29688		196	163	121	663	5.91359	5.94233	4.05171	19.6558	PF00160	PTHR11071	KOG0880	5.2.1.8	K01802	AT2G29960.1	CYP5	cyclophilin 5					GO:0003755 peptidyl-prolyl cis-trans isomerase activity;GO:0006457 protein folding;GO:0006457 protein folding;GO:0006457 protein folding;GO:0003755 peptidyl-prolyl cis-trans isomerase activity;GO:0005624 membrane fraction;GO:0005829 cytosol;GO:0005783 endoplasmic reticulum;GO:0005771 multivesicular body;GO:0005783 endoplasmic reticulum;GO:0005795 Golgi stack
Pp1s114_207V6	5.14038	5.64647	4.70329	1.56787		1169	1374	778	100	35.2703	50.0906	26.0515	2.96467		PTHR20884	KOG2720	2.7.7.69	K14190	AT4G26850.1	VTC2	mannose-1-phosphate guanylyltransferase (GDP)s;GDP-galactose:mannose-1-phosphate guanylyltransferases;GDP-galactose:glucose-1-phosphate guanylyltransferases;GDP-galactose:myoinositol-1-phosphate guanylyltransferases;glucose-1-phosphate guanylyltransferase				Ascorbate and aldarate metabolism;Metabolic pathways;Biosynthesis of secondary metabolites	GO:0019853 L-ascorbic acid biosynthetic process;GO:0009408 response to heat;GO:0042742 defense response to bacterium;GO:0009753 response to jasmonic acid stimulus;GO:0008928 mannose-1-phosphate guanylyltransferase (GDP) activity;GO:0010474 glucose-1-phosphate guanylyltransferase (GDP) activity;GO:0010475 galactose-1-phosphate guanylyltransferase (GDP) activity;GO:0010471 GDP-galactose:mannose-1-p…
Pp1s114_48V6	2.7695	3.47023	2.36645	4.40177		226	304	154	713	6.81873	11.0826	5.15672	21.1381	PF10559,PF00344	PTHR10906	KOG1373		K10956	AT1G29310.1		SecY protein transport family protein				Protein export;Protein processing in endoplasmic reticulum;Phagosome	GO:0009306 protein secretion;GO:0015031 protein transport;GO:0015450 P-P-bond-hydrolysis-driven protein transmembrane transporter activity;GO:0015450 P-P-bond-hydrolysis-driven protein transmembrane transporter activity;GO:0016020 membrane;GO:0005739 mitochondrion;GO:0016020 membrane;GO:0005886 plasma membrane
Pp1s115_78V6	2.54924	2.29912	1.68463	4.21173		194	135	96	625	5.85324	4.92156	3.21458	18.5292	PF04129	PTHR14190	KOG1961			AT1G71270.1	POK	Vps52 / Sac2 family					GO:0003674 molecular_function;GO:0005794 Golgi apparatus;GO:0009860 pollen tube growth;GO:0000139 Golgi membrane;GO:0012505 endomembrane system;GO:0019953 sexual reproduction
Pp1s118_139V6	4.67554	4.55098	1.59152	0.946384		847	643	90	65	25.5551	23.4412	3.01367	1.92704	PF03473	PTHR14237				AT5G44720.1		Molybdenum cofactor sulfurase family protein					GO:0003824 catalytic activity;GO:0003824 catalytic activity;GO:0005575 cellular_component;GO:0008150 biological_process;GO:0008265 Mo-molybdopterin cofactor sulfurase activity;GO:0030151 molybdenum ion binding;GO:0030151 molybdenum ion binding;GO:0030170 pyridoxal phosphate binding;GO:0030170 pyridoxal phosphate binding
Pp1s118_232V6	-2.05068	4.54423	2.89408	5.10517		8	640	222	1161	0.241371	23.3319	7.43371	34.4198	PF02987	PTHR23241				AT2G18340.1		late embryogenesis abundant domain-containing protein / LEA domain-containing protein					GO:0003674 molecular_function;GO:0009793 embryo development ending in seed dormancy;GO:0012505 endomembrane system
Pp1s12_126V6	-0.963213	7.05321	4.20558	6.30826		17	3643	551	2673	0.512913	132.809	18.4503	79.2457	PF00578,PF10417	PTHR10681	KOG0854	1.11.1.15,1.11.1.7,3.1.1.-	K11188	AT1G48130.1	PER1	1-cysteine peroxiredoxin 1				Phenylalanine metabolism;Phenylpropanoid biosynthesis;Metabolic pathways;Biosynthesis of secondary metabolites	GO:0005575 cellular_component;GO:0016209 antioxidant activity;GO:0008379 thioredoxin peroxidase activity;GO:0009269 response to desiccation;GO:0010231 maintenance of seed dormancy
Pp1s12_156V6	4.49042	3.81102	0.623229	3.2278		745	385	46	316	22.4777	14.0356	1.54032	9.36836						AT3G24120.1		Homeodomain-like superfamily protein					GO:0003700 sequence-specific DNA binding transcription factor activity;GO:0006355 "regulation of transcription, DNA-dependent"
Pp1s12_260V6	-1.88075	4.29376	1.81391	4.20479		9	538	105	622	0.271542	19.6133	3.51594	18.4403		PTHR10366	KOG1430			AT4G24220.1	VEP1	NAD(P)-binding Rossmann-fold superfamily protein					GO:0009611 response to wounding;GO:0010051 xylem and phloem pattern formation;GO:0008202 steroid metabolic process;GO:0035671 ;GO:0005829 cytosol;GO:0005829 cytosol
Pp1s12_270V6	4.66357	4.06779	1.0304	0.731371		840	460	61	56	25.3439	16.7698	2.0426	1.66022	PF06911	PTHR21068				AT2G17840.1	ERD7	Senescence/dehydration-associated protein-related					GO:0003674 molecular_function;GO:0009409 response to cold;GO:0009644 response to high light intensity;GO:0009651 response to salt stress;GO:0005886 plasma membrane;GO:0009414 response to water deprivation
Pp1s12_29V6	5.66786	2.67351	5.02745	4.9127		1685	175	974	1016	50.8387	6.37981	32.6146	30.1211	PF00005,PF01061,PF08370	PTHR19241	KOG0065			AT1G15520.1	PDR12	pleiotropic drug resistance 12					GO:0042626 "ATPase activity, coupled to transmembrane movement of substances";GO:0005886 plasma membrane;GO:0015692 lead ion transport;GO:0006855 drug transmembrane transport;GO:0009607 response to biotic stimulus;GO:0009723 response to ethylene stimulus;GO:0009751 response to salicylic acid stimulus;GO:0009753 response to jasmonic acid stimulus;GO:0010193 response to ozone;GO:0005886 plasma memb…
Pp1s120_164V6	5.25539	3.83333	6.15766	3.56787		1266	391	2132	400	38.1969	14.2543	71.3904	11.8587	PF00456,PF02779,PF02780	PTHR11624	KOG0523	2.2.1.1	K00615	AT3G60750.1		Transketolase				Pentose phosphate pathway;Carbon fixation in photosynthetic organisms;Metabolic pathways;Biosynthesis of secondary metabolites	GO:0003824 catalytic activity;GO:0003824 catalytic activity;GO:0004802 transketolase activity;GO:0004802 transketolase activity;GO:0004802 transketolase activity;GO:0009941 chloroplast envelope;GO:0009507 chloroplast;GO:0005515 protein binding;GO:0009570 chloroplast stroma;GO:0046686 response to cadmium ion;GO:0009651 response to salt stress;GO:0009507 chloroplast;GO:0009570 chloroplast stroma;GO…
Pp1s120_82V6	4.56587	3.12919	-0.0929782	4.03515		785	240	28	553	23.6845	8.74945	0.937585	16.3946	PF12036	PTHR14319:SF6				AT2G46060.1		transmembrane protein-related					GO:0003674 molecular_function;GO:0008150 biological_process;GO:0016020 membrane
Pp1s121_135V6	2.73068	3.40221	5.29565	5.04296		220	290	1173	1112	6.6377	10.5723	39.2781	32.9672	PF05922	PTHR10795				AT1G71950.1		Proteinase inhibitor, propeptide					GO:0004252 serine-type endopeptidase activity;GO:0042802 identical protein binding;GO:0043086 negative regulation of catalytic activity;GO:0005886 plasma membrane;GO:0005829 cytosol
Pp1s122_5V6	4.29584	3.18809	-0.900333	3.52021		651	250	16	387	19.6416	9.11401	0.535763	11.4733	PF00085	PTHR18929	KOG0190			AT5G60640.1	PDIL1-4	PDI-like 1-4				Protein processing in endoplasmic reticulum	GO:0005739 mitochondrion;GO:0006979 response to oxidative stress;GO:0005739 mitochondrion;GO:0009507 chloroplast;GO:0009507 chloroplast;GO:0005783 endoplasmic reticulum;GO:0005774 vacuolar membrane;GO:0005774 vacuolar membrane;GO:0003756 protein disulfide isomerase activity
Pp1s125_16V6	2.13915	2.37205	1.43952	4.07376		146	142	81	568	4.40502	5.17676	2.7123	16.8393	PF11891					AT5G22790.1	RER1	reticulata-related 1					GO:0003674 molecular_function;GO:0008150 biological_process;GO:0009706 chloroplast inner membrane;GO:0009941 chloroplast envelope;GO:0005739 mitochondrion;GO:0009536 plastid
Pp1s126_63V6	5.93445	4.54423	2.00656	3.88402		2027	640	120	498	61.1574	23.3319	4.01822	14.7641	PF03208	PTHR19317	KOG3142			AT2G38360.1	PRA1.B4	prenylated RAB acceptor 1.B4					GO:0003674 molecular_function;GO:0005783 endoplasmic reticulum;GO:0016192 vesicle-mediated transport;GO:0005829 cytosol
Pp1s126_81V6	3.43314	3.1765	4.08266	1.38345		358	248	506	88	10.8013	9.0411	16.9435	2.60891		PTHR14194	KOG1203			AT2G37660.1		NAD(P)-binding Rossmann-fold superfamily protein					GO:0009507 chloroplast;GO:0009570 chloroplast stroma;GO:0009579 thylakoid;GO:0042742 defense response to bacterium;GO:0009507 chloroplast;GO:0048046 apoplast;GO:0009570 chloroplast stroma;GO:0005507 copper ion binding
Pp1s129_115V6	5.08631	4.55322	0.347594	1.6922		1126	644	38	109	33.973	23.4777	1.27244	3.23149						AT2G15890.1	MEE14	maternal effect embryo arrest 14					GO:0003674 molecular_function;GO:0009793 embryo development ending in seed dormancy;GO:0009507 chloroplast;GO:0009507 chloroplast;GO:0050832 defense response to fungus
Pp1s13_291V6	3.8771	2.92966	3.14406	4.90986		487	209	264	1014	14.6935	7.61931	8.84009	30.0618	PF02453	PTHR10994	KOG1792			AT2G46170.1		Reticulon family protein					GO:0005783 endoplasmic reticulum;GO:0005886 plasma membrane;GO:0005783 endoplasmic reticulum;GO:0005886 plasma membrane;GO:0005886 plasma membrane;GO:0080167 response to karrikin
Pp1s13_392V6	3.93801	2.68173	4.30912	2.39975		508	176	592	178	15.3271	6.41626	19.8232	5.27712	PF08241,PF08242	PTHR10108	KOG1540		K12502	AT3G63410.1	APG1	S-adenosyl-L-methionine-dependent methyltransferases superfamily protein				Ubiquinone and other terpenoid-quinone biosynthesis;Metabolic pathways;Biosynthesis of secondary metabolites	GO:0008168 methyltransferase activity;GO:0009706 chloroplast inner membrane;GO:0009941 chloroplast envelope;GO:0008757 S-adenosylmethionine-dependent methyltransferase activity;GO:0009507 chloroplast;GO:0009706 chloroplast inner membrane;GO:0010236 plastoquinone biosynthetic process;GO:0009941 chloroplast envelope;GO:0010189 vitamin E biosynthetic process;GO:0010236 plastoquinone biosynthetic pro…
Pp1s130_82V6	4.54924	3.31506	4.09402	6.43972		776	273	510	2928	23.413	9.9525	17.0774	86.8056	PF03141,PF08241					AT4G19120.1	ERD3	S-adenosyl-L-methionine-dependent methyltransferases superfamily protein
Pp1s131_197V6	5.01002	2.68173	-0.145446	4.36903		1068	176	27	697	32.223	6.41626	0.9041	20.6638	PF01169	PTHR12608	KOG2881			AT4G13590.2		Uncharacterized protein family (UPF0016)					GO:0009706 chloroplast inner membrane;GO:0009941 chloroplast envelope;GO:0009507 chloroplast
Pp1s133_10V6	5.72986	5.61462	2.60746	6.97148		1759	1344	182	4233	53.0714	48.9969	6.0943	125.495	PF01293			4.1.1.49	K01610	AT4G37870.1	PCK1	phosphoenolpyruvate carboxykinase 1				Glycolysis / Gluconeogenesis;Citrate cycle (TCA cycle);Pyruvate metabolism;Carbon fixation in photosynthetic organisms;Metabolic pathways;Biosynthesis of secondary metabolites	GO:0004612 phosphoenolpyruvate carboxykinase (ATP) activity;GO:0005524 ATP binding;GO:0006094 gluconeogenesis;GO:0005730 nucleolus;GO:0046686 response to cadmium ion;GO:0005515 protein binding;GO:0005515 protein binding;GO:0005515 protein binding;GO:0005515 protein binding;GO:0005515 protein binding;GO:0005515 protein binding;GO:0016036 cellular response to phosphate starvation;GO:0016020 membran…
Pp1s133_21V6	4.39641	3.82593	-0.145446	4.04814		698	389	27	558	21.0596	14.1814	0.9041	16.5429	PF00023,PF00097	PTHR18958	KOG4172			AT3G23280.2	XBAT35	XB3 ortholog 5 in Arabidopsis thaliana					GO:0008270 zinc ion binding;GO:0008270 zinc ion binding;GO:0008270 zinc ion binding
Pp1s133_93V6	3.55295	4.03608	5.95687	5.66885		389	450	1855	1716	11.7367	16.4052	62.115	50.8738	PF00831	PTHR13872	KOG3436		K02918	AT5G02610.1		Ribosomal L29 family protein				Ribosome	GO:0003735 structural constituent of ribosome;GO:0003735 structural constituent of ribosome;GO:0003735 structural constituent of ribosome;GO:0005840 ribosome;GO:0006412 translation;GO:0006412 translation;GO:0006412 translation;GO:0042254 ribosome biogenesis;GO:0005886 plasma membrane;GO:0022626 cytosolic ribosome;GO:0005774 vacuolar membrane;GO:0022625 cytosolic large ribosomal subunit
Pp1s134_151V6	3.86819	3.40718	6.04291	4.64169		484	291	1969	842	14.6029	10.6087	65.9323	24.9625	PF00827	PTHR11847	KOG1678		K02877	AT4G16720.1		Ribosomal protein L23/L15e family protein				Ribosome	GO:0003735 structural constituent of ribosome;GO:0003735 structural constituent of ribosome;GO:0005840 ribosome;GO:0006412 translation;GO:0006412 translation;GO:0022626 cytosolic ribosome;GO:0022626 cytosolic ribosome;GO:0022626 cytosolic ribosome;GO:0005774 vacuolar membrane;GO:0005886 plasma membrane;GO:0022625 cytosolic large ribosomal subunit;GO:0005829 cytosol
Pp1s136_29V6	3.09907	3.70612	-1.09298	3.6922		284	358	14	436	8.56867	13.0513	0.468793	12.926	PF00270,PF00271	PTHR10967	KOG0328		K03257	AT3G13920.1	EIF4A1	eukaryotic translation initiation factor 4A1					GO:0003743 translation initiation factor activity;GO:0008026 ATP-dependent helicase activity;GO:0006413 translational initiation;GO:0005515 protein binding;GO:0005730 nucleolus;GO:0005730 nucleolus;GO:0005618 cell wall;GO:0005618 cell wall;GO:0046686 response to cadmium ion;GO:0046686 response to cadmium ion;GO:0016020 membrane;GO:0016020 membrane;GO:0016020 membrane;GO:0005829 cytosol;GO:0005515…
Pp1s137_134V6	3.79795	3.58425	3.5754	0.651937		461	329	356	53	13.909	11.994	11.9207	1.57128	PF03647	PTHR12668	KOG4267			AT3G43520.1		Transmembrane proteins 14C					GO:0008150 biological_process;GO:0009941 chloroplast envelope;GO:0009507 chloroplast;GO:0009507 chloroplast
Pp1s138_79V6	3.48848	3.11104	1.99448	4.24369		372	237	119	639	11.2237	8.64008	3.98474	18.9443	PF00069,PF00036	PTHR22982	KOG0032			AT5G04870.1	CPK1	calcium dependent protein kinase 1				Plant-pathogen interaction	GO:0004683 calmodulin-dependent protein kinase activity;GO:0006468 protein phosphorylation;GO:0016020 membrane;GO:0016301 kinase activity;GO:0004683 calmodulin-dependent protein kinase activity;GO:0006468 protein phosphorylation;GO:0005777 peroxisome;GO:0005515 protein binding;GO:0004674 protein serine/threonine kinase activity;GO:0046777 protein autophosphorylation
Pp1s14_298V6	4.67554	3.28839	3.34284	0.968411		847	268	303	66	25.5551	9.77022	10.146	1.95668	PF00118,PF03144	PTHR11353	KOG0356			AT1G55490.2	CPN60B	chaperonin 60 beta					GO:0006457 protein folding;GO:0008219 cell death;GO:0009627 systemic acquired resistance;GO:0051085 chaperone mediated protein folding requiring cofactor;GO:0009941 chloroplast envelope;GO:0009941 chloroplast envelope;GO:0009941 chloroplast envelope;GO:0009941 chloroplast envelope;GO:0009507 chloroplast;GO:0009507 chloroplast;GO:0009507 chloroplast;GO:0022626 cytosolic ribosome;GO:0022626 cytosol…
Pp1s14_433V6	4.33734	5.19528	4.39658	1.73137		670	1005	629	112	20.2148	36.6383	21.0622	3.32043	PF00416	PTHR10871	KOG3311		K02964	AT1G34030.1		Ribosomal protein S13/S18 family					GO:0003735 structural constituent of ribosome;GO:0006412 translation;GO:0006412 translation;GO:0015935 small ribosomal subunit;GO:0042254 ribosome biogenesis;GO:0005886 plasma membrane;GO:0022626 cytosolic ribosome;GO:0022626 cytosolic ribosome;GO:0005618 cell wall;GO:0005774 vacuolar membrane;GO:0016020 membrane;GO:0022627 cytosolic small ribosomal subunit;GO:0005515 protein binding;GO:0005829 c…
Pp1s141_147V6	1.13915	4.97049	4.31156	2.43972		73	860	593	183	2.20251	31.3522	19.8567	5.42535
Pp1s142_145V6	2.08887	4.91055	2.88757	3.71843		141	825	221	444	4.25416	30.0762	7.40023	13.1631						AT4G33625.1							GO:0003674 molecular_function;GO:0008150 biological_process;GO:0005773 vacuole;GO:0005774 vacuolar membrane;GO:0005774 vacuolar membrane
Pp1s143_131V6	4.06307	3.02966	1.5591	3.84288		554	224	88	484	16.7149	8.16615	2.9467	14.349	PF04172					AT1G32080.1		membrane protein, putative					GO:0009706 chloroplast inner membrane;GO:0009941 chloroplast envelope;GO:0009941 chloroplast envelope;GO:0009507 chloroplast;GO:0016020 membrane;GO:0009507 chloroplast
Pp1s149_6V6	2.17814	3.78072	-0.508016	4.72976		150	377	21	895	4.5257	13.7439	0.703189	26.5338	PF07466					AT1G54520.1							GO:0003674 molecular_function;GO:0008150 biological_process;GO:0009507 chloroplast;GO:0009507 chloroplast
Pp1s15_397V6	5.695	5.02966	3.17113	5.85328		1717	896	269	1950	51.8042	32.6646	9.00752	57.8111	PF01738	PTHR17630	KOG3043	3.1.1.45	K01061	AT2G32520.1		alpha/beta-Hydrolases superfamily protein				Metabolic pathways	GO:0016747 "transferase activity, transferring acyl groups other than amino-acyl groups";GO:0016787 hydrolase activity;GO:0016787 hydrolase activity;GO:0009507 chloroplast;GO:0010043 response to zinc ion;GO:0005829 cytosol
Pp1s150_114V6	6.44468	5.64961	4.86122	7.28349		2887	1377	868	5255	87.1047	50.2	29.0651	155.794	PF00005	PTHR19229	KOG0059			AT3G47730.1	ABCA2	ATP-binding cassette A2					GO:0005215 transporter activity;GO:0042626 "ATPase activity, coupled to transmembrane movement of substances";GO:0005215 transporter activity
Pp1s152_152V6	6.08824	7.06897	8.38464	5.96225		2255	3683	9981	2103	68.0364	134.268	334.216	62.3471	PF00428	PTHR21141	KOG1762		K02942	AT5G24510.1		60S acidic ribosomal protein family				Ribosome	GO:0003735 structural constituent of ribosome;GO:0003735 structural constituent of ribosome;GO:0005840 ribosome;GO:0006414 translational elongation;GO:0006414 translational elongation;GO:0022626 cytosolic ribosome
Pp1s152_19V6	2.91511	3.21099	-0.0929782	2.99011		250	254	28	268	7.54284	9.25983	0.937585	7.94532	PF05678					AT4G39720.1		VQ motif-containing protein					GO:0003674 molecular_function;GO:0005575 cellular_component;GO:0008150 biological_process
Pp1s152_53V6	3.46896	4.67763	1.89408	3.09894		367	702	111	289	11.0729	25.5921	3.71686	8.5679	PF02779,PF02780	PTHR11624	KOG0525	1.2.4.4	K00167	AT3G13450.1	DIN4	Transketolase family protein				Valine, leucine and isoleucine degradation;Metabolic pathways;Biosynthesis of secondary metabolites	GO:0003824 catalytic activity;GO:0003863 3-methyl-2-oxobutanoate dehydrogenase (2-methylpropanoyl-transferring) activity
Pp1s154_125V6	3.44518	3.61032	1.52593	4.6638		361	335	86	855	10.8919	12.2128	2.87973	25.3479	PF01423	PTHR15588	KOG1784		K12627	AT1G65700.3		Small nuclear ribonucleoprotein family protein				RNA degradation;Spliceosome	GO:0003674 molecular_function;GO:0005634 nucleus;GO:0005732 small nucleolar ribonucleoprotein complex;GO:0008150 biological_process;GO:0005829 cytosol;GO:0005829 cytosol
Pp1s154_129V6	3.97446	3.46548	5.83607	3.63482		521	303	1706	419	15.7193	11.0462	57.1257	12.422	PF05162
Pp1s154_134V6	3.64281	4.25297	5.97465	4.99011		414	523	1878	1072	12.4909	19.0665	62.8852	31.7813	PF00297	PTHR11363	KOG0746		K02925	AT1G61580.1	RPL3B	R-protein L3 B				Ribosome	GO:0003735 structural constituent of ribosome;GO:0003735 structural constituent of ribosome;GO:0005840 ribosome;GO:0006412 translation;GO:0006412 translation;GO:0016020 membrane;GO:0022625 cytosolic large ribosomal subunit;GO:0022625 cytosolic large ribosomal subunit
Pp1s154_6V6	4.54365	4.39473	1.43952	3.51647		773	577	81	386	23.3225	21.0351	2.7123	11.4436	PF00364,PF00198	PTHR23151	KOG0559	2.3.1.61	K00658	AT4G26910.1		Dihydrolipoamide succinyltransferase				Citrate cycle (TCA cycle);Lysine degradation;Metabolic pathways;Biosynthesis of secondary metabolites	GO:0006099 tricarboxylic acid cycle;GO:0006099 tricarboxylic acid cycle;GO:0006099 tricarboxylic acid cycle;GO:0008152 metabolic process;GO:0008152 metabolic process;GO:0008152 metabolic process;GO:0008152 metabolic process;GO:0008415 acyltransferase activity;GO:0005739 mitochondrion;GO:0005739 mitochondrion;GO:0005739 mitochondrion;GO:0005739 mitochondrion;GO:0016020 membrane;GO:0016020 membrane…
Pp1s156_44V6	4.08888	2.1765	4.7381	2.93524		564	124	797	258	17.0166	4.52055	26.6877	7.64885
Pp1s157_76V6	3.15878	3.65275	1.60746	4.66042		296	345	91	853	8.93072	12.5773	3.04715	25.2887	PF02943					AT2G04700.1		ferredoxin thioredoxin reductase catalytic beta chain family protein					GO:0008937 ferredoxin reductase activity;GO:0030385 ferredoxin:thioredoxin reductase activity;GO:0055114 oxidation-reduction process;GO:0009507 chloroplast
Pp1s157_85V6	2.86221	1.89473	1.42159	3.70538		241	102	80	440	7.2713	3.71852	2.67882	13.0446		PTHR12763	KOG0723			AT2G35795.1		Chaperone DnaJ-domain superfamily protein					GO:0005575 cellular_component;GO:0006457 protein folding;GO:0031072 heat shock protein binding
Pp1s159_20V6	3.79795	3.11104	1.5754	5.33128		461	237	89	1358	13.909	8.64008	2.98018	40.2603	PF03098	PTHR11903	KOG2408	1.-.-.-	K10529	AT1G73680.1	ALPHA DOX2	alpha dioxygenase					GO:0005575 cellular_component;GO:0016702 "oxidoreductase activity, acting on single donors with incorporation of molecular oxygen, incorporation of two atoms of oxygen";GO:0051707 response to other organism;GO:0001676 long-chain fatty acid metabolic process;GO:0006631 fatty acid metabolic process;GO:0010150 leaf senescence;GO:0051213 dioxygenase activity
Pp1s16_88V6	6.03081	5.19385	2.50906	3.96841		2167	1004	170	528	65.3813	36.6019	5.69248	15.6535	PF01764	PTHR21493				AT4G00500.2		alpha/beta-Hydrolases superfamily protein					GO:0004806 triglyceride lipase activity;GO:0005516 calmodulin binding;GO:0006629 lipid metabolic process;GO:0006629 lipid metabolic process;GO:0006629 lipid metabolic process;GO:0012505 endomembrane system;GO:0012505 endomembrane system;GO:0016042 lipid catabolic process;GO:0016042 lipid catabolic process;GO:0005516 calmodulin binding
Pp1s16_94V6	2.53429	3.4463	4.19506	1.71843		192	299	547	111	5.7929	10.9004	18.3164	3.29079	PF05004,PF04836	PTHR12354	KOG2842			AT1G27760.3	SAT32	interferon-related developmental regulator family protein / IFRD protein family					GO:0005488 binding;GO:0005488 binding;GO:0005488 binding;GO:0005634 nucleus;GO:0005737 cytoplasm;GO:0009651 response to salt stress
Pp1s161_125V6	4.02079	3.18809	1.85455	3.96841		538	250	108	528	16.2322	9.11401	3.6164	15.6535	PF00639,PF00581	PTHR10657	KOG3258			AT5G19370.1		rhodanese-like domain-containing protein / PPIC-type PPIASE domain-containing protein					GO:0008150 biological_process;GO:0016853 isomerase activity;GO:0016853 isomerase activity;GO:0009507 chloroplast
Pp1s161_8V6	-0.243321	4.38469	2.59951	4.49956		28	573	181	763	0.844798	20.8893	6.06082	22.6205		PTHR23241	KOG2886			AT1G72100.1		late embryogenesis abundant domain-containing protein / LEA domain-containing protein					GO:0009793 embryo development ending in seed dormancy;GO:0012505 endomembrane system
Pp1s162_107V6	4.25994	3.27758	-0.900333	3.80666		635	266	16	472	19.1588	9.69731	0.535763	13.9933	PF00646					AT4G29420.1		F-box/RNI-like superfamily protein					GO:0003674 molecular_function;GO:0008150 biological_process
Pp1s162_10V6	3.57138	3.96377	0.22895	2.84883		394	428	35	243	11.8875	15.6032	1.17198	7.20415	PF01842,PF10369		KOG2663	2.2.1.6	K01653	AT2G31810.1		ACT domain-containing small subunit of acetolactate synthase protein				Valine, leucine and isoleucine biosynthesis;Butanoate metabolism;C5-Branched dibasic acid metabolism;Pantothenate and CoA biosynthesis;Metabolic pathways;Biosynthesis of secondary metabolites	GO:0003984 acetolactate synthase activity;GO:0003984 acetolactate synthase activity;GO:0003984 acetolactate synthase activity;GO:0016597 amino acid binding;GO:0016597 amino acid binding;GO:0016597 amino acid binding;GO:0009082 branched chain family amino acid biosynthetic process;GO:0009507 chloroplast;GO:0009507 chloroplast;GO:0009507 chloroplast
Pp1s162_25V6	2.1092	2.01672	1.05386	3.7851		143	111	62	465	4.31451	4.04662	2.07608	13.7857	PF01138,PF03725	PTHR11097	KOG1612		K12589	AT3G07750.1		3\'-5\'-exoribonuclease family protein				RNA degradation	GO:0000175 3'-5'-exoribonuclease activity;GO:0000175 3'-5'-exoribonuclease activity;GO:0000175 3'-5'-exoribonuclease activity;GO:0003723 RNA binding;GO:0003723 RNA binding;GO:0003723 RNA binding;GO:0005575 cellular_component;GO:0006396 RNA processing;GO:0006396 RNA processing;GO:0006396 RNA processing
Pp1s162_9V6	4.93943	4.63804	0.491984	3.43972		1017	683	42	366	30.6843	24.8995	1.40638	10.8507	PF00118	PTHR11353	KOG0358			AT3G18190.1		TCP-1/cpn60 chaperonin family protein					GO:0005524 ATP binding;GO:0051082 unfolded protein binding;GO:0046686 response to cadmium ion;GO:0005829 cytosol
Pp1s164_16V6	2.7631	1.92274	4.07695	3.25045		225	104	504	321	6.78856	3.79143	16.8765	9.5166	PF01411,PF07973,PF02272	PTHR11777	KOG0188	6.1.1.7	K01872	AT1G50200.1	ALATS	Alanyl-tRNA synthetase				Aminoacyl-tRNA biosynthesis	GO:0000166 nucleotide binding;GO:0000166 nucleotide binding;GO:0003676 nucleic acid binding;GO:0003676 nucleic acid binding;GO:0004813 alanine-tRNA ligase activity;GO:0004813 alanine-tRNA ligase activity;GO:0005524 ATP binding;GO:0005524 ATP binding;GO:0006419 alanyl-tRNA aminoacylation;GO:0016876 "ligase activity, forming aminoacyl-tRNA and related compounds";GO:0016876 "ligase activity, forming…
Pp1s164_92V6	6.17333	4.25572	2.51752	5.73459		2392	524	171	1796	72.1699	19.103	5.72597	53.2455	PF00702	PTHR18901	KOG3109			AT5G59480.1		Haloacid dehalogenase-like hydrolase (HAD) superfamily protein					GO:0016787 hydrolase activity;GO:0016787 hydrolase activity;GO:0016787 hydrolase activity
Pp1s165_65V6	5.77667	5.01996	3.80011	5.56877		1817	890	416	1601	54.8214	32.4459	13.9298	47.4644	PF00656					AT1G79340.1	MC4	metacaspase 4					GO:0008234 cysteine-type peptidase activity;GO:0005886 plasma membrane;GO:0005829 cytosol;GO:0004197 cysteine-type endopeptidase activity;GO:0016540 protein autoprocessing;GO:0043068 positive regulation of programmed cell death;GO:0005737 cytoplasm;GO:0005829 cytosol;GO:0016540 protein autoprocessing;GO:0043068 positive regulation of programmed cell death;GO:0043068 positive regulation of program…
Pp1s167_116V6	4.64976	3.11104	-0.0929782	3.0533		832	237	28	280	25.1026	8.64008	0.937585	8.30108	PF00403	PTHR22814	KOG1603			AT1G06330.1		Heavy metal transport/detoxification superfamily protein					GO:0005507 copper ion binding;GO:0005575 cellular_component;GO:0006825 copper ion transport;GO:0030001 metal ion transport;GO:0046872 metal ion binding
Pp1s167_34V6	3.80107	2.9088	3.51329	0.781998		462	206	341	58	13.9392	7.50994	11.4184	1.71951	PF03195					AT5G67420.1	LBD37	LOB domain-containing protein 37					GO:0005575 cellular_component;GO:0006807 nitrogen compound metabolic process;GO:0060776 simple leaf morphogenesis
Pp1s169_107V6	2.44917	2.44147	1.49198	3.37523		181	149	84	350	5.46102	5.43195	2.81276	10.3764	PF01370	PTHR10366	KOG1372	4.2.1.47	K01711	AT5G66280.1	GMD1	GDP-D-mannose 4,6-dehydratase 1				Fructose and mannose metabolism;Amino sugar and nucleotide sugar metabolism;Metabolic pathways	GO:0005622 intracellular;GO:0008152 metabolic process;GO:0008446 "GDP-mannose 4,6-dehydratase activity";GO:0009225 nucleotide-sugar metabolic process;GO:0019673 GDP-mannose metabolic process;GO:0044237 cellular metabolic process;GO:0005515 protein binding
Pp1s169_50V6	4.54365	1.54423	4.41028	2.6789		773	80	635	216	23.3225	2.91648	21.2631	6.40369	PF01409,PF03147	PTHR11538	KOG2783	6.1.1.20	K01889	AT3G58140.1		phenylalanyl-tRNA synthetase class IIc family protein				Aminoacyl-tRNA biosynthesis	GO:0000049 tRNA binding;GO:0000166 nucleotide binding;GO:0000287 magnesium ion binding;GO:0004812 aminoacyl-tRNA ligase activity;GO:0004826 phenylalanine-tRNA ligase activity;GO:0004826 phenylalanine-tRNA ligase activity;GO:0005524 ATP binding;GO:0005524 ATP binding;GO:0006412 translation;GO:0006418 tRNA aminoacylation for protein translation;GO:0006432 phenylalanyl-tRNA aminoacylation;GO:0006432…
Pp1s17_154V6	2.98824	3.54873	0.0538632	2.71192		263	321	31	221	7.93507	11.7024	1.03804	6.55193	PF00226	PTHR11821				AT1G80920.1	J8	Chaperone DnaJ-domain superfamily protein					GO:0006457 protein folding;GO:0031072 heat shock protein binding;GO:0051082 unfolded protein binding;GO:0005634 nucleus;GO:0006950 response to stress;GO:0009570 chloroplast stroma
Pp1s17_213V6	3.09907	2.38217	0.491984	3.47861		284	143	42	376	8.56867	5.21321	1.40638	11.1472	PF07651	PTHR22951	KOG0251			AT2G01600.1		ENTH/ANTH/VHS superfamily protein					GO:0005488 binding;GO:0005543 phospholipid binding;GO:0005545 1-phosphatidylinositol binding;GO:0030276 clathrin binding;GO:0048268 clathrin coat assembly;GO:0016020 membrane
Pp1s17_59V6	4.49042	5.14265	6.18978	3.56787		745	969	2180	400	22.4777	35.3259	72.9977	11.8587	PF00291	PTHR10314	KOG1252	2.5.1.47	K01738	AT2G43750.2	OASB	O-acetylserine (thiol) lyase B				Cysteine and methionine metabolism;Sulfur metabolism;Metabolic pathways	GO:0004124 cysteine synthase activity;GO:0004124 cysteine synthase activity;GO:0009536 plastid;GO:0019344 cysteine biosynthetic process;GO:0005739 mitochondrion;GO:0009941 chloroplast envelope;GO:0005739 mitochondrion;GO:0009507 chloroplast;GO:0009570 chloroplast stroma;GO:0046686 response to cadmium ion;GO:0009507 chloroplast;GO:0048046 apoplast;GO:0009570 chloroplast stroma
Pp1s170_67V6	3.83807	3.19958	5.41141	4.40177		474	252	1271	713	14.3012	9.18692	42.5597	21.1381	PF00111,PF10588,PF00384,PF09326	PTHR11615	KOG2282	1.6.5.3,1.6.99.3	K03934	AT5G37510.2	EMB1467	NADH-ubiquinone dehydrogenase, mitochondrial, putative				Oxidative phosphorylation;Metabolic pathways	GO:0003954 NADH dehydrogenase activity;GO:0008137 NADH dehydrogenase (ubiquinone) activity;GO:0008137 NADH dehydrogenase (ubiquinone) activity;GO:0008137 NADH dehydrogenase (ubiquinone) activity;GO:0009055 electron carrier activity;GO:0009055 electron carrier activity;GO:0009793 embryo development ending in seed dormancy;GO:0016491 oxidoreductase activity;GO:0016491 oxidoreductase activity;GO:001…
Pp1s172_4V6	4.37559	3.29912	2.35705	5.70374		688	270	153	1758	20.7579	9.84313	5.12323	52.1189
Pp1s173_136V6	3.02614	4.03928	0.932557	1.84288		270	451	57	121	8.14627	16.4417	1.90866	3.58725	PF00069,PF07714	PTHR11295	KOG0661	2.7.11.22	K08829	AT4G19110.2		Protein kinase superfamily protein					GO:0004672 protein kinase activity;GO:0004672 protein kinase activity;GO:0004672 protein kinase activity;GO:0004674 protein serine/threonine kinase activity;GO:0004674 protein serine/threonine kinase activity;GO:0004674 protein serine/threonine kinase activity;GO:0005524 ATP binding;GO:0005524 ATP binding;GO:0005524 ATP binding;GO:0006468 protein phosphorylation;GO:0006468 protein phosphorylation…
Pp1s173_16V6	2.12923	3.39723	4.60746	2.35028		145	289	728	172	4.37485	10.5358	24.3772	5.09924	PF00318	PTHR11489	KOG0830			AT1G72370.1	P40	40s ribosomal protein SA					GO:0000028 ribosomal small subunit assembly;GO:0000447 "endonucleolytic cleavage in ITS1 to separate SSU-rRNA from 5.8S rRNA and LSU-rRNA from tricistronic rRNA transcript (SSU-rRNA, 5.8S rRNA, LSU-rRNA)";GO:0000461 "endonucleolytic cleavage to generate mature 3'-end of SSU-rRNA from (SSU-rRNA, 5.8S rRNA, LSU-rRNA)";GO:0003735 structural constituent of ribosome;GO:0006407 rRNA export from nucleus…
Pp1s174_37V6	6.40927	3.96377	1.62323	5.08263		2817	428	92	1143	84.9927	15.6032	3.08064	33.8862	PF00226,PF00684,PF01556	PTHR11821	KOG0712			AT5G22060.1	J2	DNAJ homologue 2					GO:0005524 ATP binding;GO:0006457 protein folding;GO:0031072 heat shock protein binding;GO:0051082 unfolded protein binding;GO:0005886 plasma membrane;GO:0005829 cytosol;GO:0006457 protein folding;GO:0006457 protein folding
Pp1s18_223V6	5.40465	5.30844	3.38969	6.98201		1404	1087	313	4264	42.3606	39.6277	10.4809	126.414	PF04832	PTHR11220				AT2G37970.1	SOUL-1	SOUL heme-binding family protein					GO:0005488 binding;GO:0005886 plasma membrane;GO:0005773 vacuole;GO:0010017 red or far-red light signaling pathway;GO:0005886 plasma membrane;GO:0005886 plasma membrane;GO:0005829 cytosol
Pp1s18_283V6	2.17814	3.283	0.772092	3.87238		150	267	51	494	4.5257	9.73376	1.70774	14.6455	PF01636,PF01633	PTHR22603	KOG4720			AT2G26830.1	emb1187	Protein kinase superfamily protein				Glycerophospholipid metabolism;Metabolic pathways	GO:0009793 embryo development ending in seed dormancy;GO:0016301 kinase activity;GO:0016773 "phosphotransferase activity, alcohol group as acceptor"
Pp1s18_306V6	1.17814	3.49843	3.73991	3.10889		75	310	399	291	2.26285	11.3014	13.3606	8.6272	PF02987	PTHR23241				AT3G53040.1		late embryogenesis abundant protein, putative / LEA protein, putative					GO:0009793 embryo development ending in seed dormancy
Pp1s180_8V6	2.66357	4.17359	2.09967	5.12981		210	495	128	1181	6.33599	18.0457	4.2861	35.0128
Pp1s182_26V6	5.57229	3.22793	5.38276	2.82488		1577	257	1246	239	47.5802	9.3692	41.7225	7.08557	PF05757					AT4G21280.1	PSBQA	photosystem II subunit QA				Photosynthesis;Metabolic pathways	GO:0005509 calcium ion binding;GO:0005509 calcium ion binding;GO:0009654 oxygen evolving complex;GO:0030095 chloroplast photosystem II;GO:0009543 chloroplast thylakoid lumen;GO:0031977 thylakoid lumen;GO:0009543 chloroplast thylakoid lumen;GO:0009579 thylakoid;GO:0009535 chloroplast thylakoid membrane;GO:0009579 thylakoid;GO:0009507 chloroplast;GO:0009535 chloroplast thylakoid membrane;GO:0009535…
Pp1s183_29V6	4.52297	2.77689	5.62617	5.22437		762	188	1475	1261	22.9906	6.85373	49.3907	37.3845	PF00903
Pp1s183_67V6	4.64281	3.08028	5.45061	0.350281		828	232	1306	43	24.9819	8.4578	43.7317	1.27481	PF01554	PTHR11206	KOG1347			AT5G52450.1		MATE efflux family protein					GO:0005215 transporter activity;GO:0015238 drug transmembrane transporter activity;GO:0015297 antiporter activity;GO:0016020 membrane;GO:0009624 response to nematode;GO:0005774 vacuolar membrane
Pp1s184_64V6	6.13977	6.96882	8.41934	6.0578		2337	3436	10224	2247	70.5105	125.263	342.353	66.6162	PF11976,PF00240,PF01599	PTHR10666	KOG0004		K02977	AT2G47110.2	UBQ6	ubiquitin 6				Ribosome	GO:0003735 structural constituent of ribosome;GO:0003735 structural constituent of ribosome;GO:0005622 intracellular;GO:0022627 cytosolic small ribosomal subunit;GO:0006511 ubiquitin-dependent protein catabolic process;GO:0042787 protein ubiquitination involved in ubiquitin-dependent protein catabolic process
Pp1s185_126V6	4.07345	1.86616	1.22895	2.24594		558	100	70	160	16.8356	3.6456	2.34396	4.74348
Pp1s186_83V6	4.59138	2.43175	4.56523	4.14802		799	148	707	598	24.1069	5.39549	23.674	17.7287	PF00430			3.6.3.14	K02109	AT4G32260.1		ATPase, F0 complex, subunit B/B\', bacterial/chloroplast				Oxidative phosphorylation;Photosynthesis;Metabolic pathways	GO:0015078 hydrogen ion transmembrane transporter activity;GO:0009941 chloroplast envelope;GO:0009535 chloroplast thylakoid membrane;GO:0009579 thylakoid;GO:0009507 chloroplast;GO:0009535 chloroplast thylakoid membrane;GO:0009535 chloroplast thylakoid membrane;GO:0042742 defense response to bacterium;GO:0016020 membrane;GO:0009507 chloroplast;GO:0009579 thylakoid
Pp1s189_18V6	4.61821	2.60601	4.98384	1.24594		814	167	945	80	24.5595	6.08816	31.6435	2.37174	PF02012					AT5G23120.1	HCF136	photosystem II stability/assembly factor, chloroplast (HCF136)					GO:0030095 chloroplast photosystem II;GO:0009543 chloroplast thylakoid lumen;GO:0009543 chloroplast thylakoid lumen;GO:0031977 thylakoid lumen;GO:0009543 chloroplast thylakoid lumen;GO:0009579 thylakoid;GO:0006461 protein complex assembly;GO:0009535 chloroplast thylakoid membrane;GO:0009579 thylakoid;GO:0009507 chloroplast;GO:0009535 chloroplast thylakoid membrane;GO:0009535 chloroplast thylakoid…
Pp1s19_68V6	2.31565	2.29912	3.97618	2.782		165	135	470	232	4.97828	4.92156	15.738	6.87804	PF00231	PTHR11693	KOG1531	3.6.3.14	K02136	AT2G33040.1	ATP3	gamma subunit of Mt ATP synthase				Oxidative phosphorylation;Metabolic pathways	GO:0015986 ATP synthesis coupled proton transport;GO:0015986 ATP synthesis coupled proton transport;GO:0015992 proton transport;GO:0016020 membrane;GO:0005739 mitochondrion;GO:0005739 mitochondrion;GO:0009507 chloroplast;GO:0005739 mitochondrion;GO:0005730 nucleolus;GO:0005634 nucleus;GO:0005737 cytoplasm;GO:0005618 cell wall;GO:0005753 mitochondrial proton-transporting ATP synthase complex;GO:00…
Pp1s191_128V6	4.19725	0.866158	0.743523	3.71518		608	50	50	443	18.3442	1.8228	1.67426	13.1335	PF04526	PTHR23130	KOG4293			AT5G35735.1		Auxin-responsive family protein					GO:0016020 membrane;GO:0005886 plasma membrane
Pp1s191_87V6	2.12923	2.52608	0.421595	3.53873		145	158	40	392	4.37485	5.76005	1.33941	11.6215	PF02482					AT5G24490.1		30S ribosomal protein, putative					GO:0003735 structural constituent of ribosome;GO:0005488 binding;GO:0005840 ribosome;GO:0006412 translation;GO:0044238 primary metabolic process;GO:0009507 chloroplast;GO:0009507 chloroplast
Pp1s194_22V6	3.26674	4.32296	2.28949	4.39975		319	549	146	712	9.62467	20.0144	4.88884	21.1085	PF02151,PF03130,PF00515,PF07719	PTHR22904				AT4G08320.1		Tetratricopeptide repeat (TPR)-like superfamily protein					GO:0005488 binding;GO:0005488 binding;GO:0008150 biological_process
Pp1s196_28V6	3.97723	4.81289	0.0065575	2.84883		522	771	30	243	15.7495	28.1076	1.00456	7.20415		PTHR21004				AT1G28320.1	DEG15	protease-related					GO:0004175 endopeptidase activity
Pp1s196_73V6	2.38395	1.1765	1.50906	3.39975		173	62	85	356	5.21965	2.26027	2.84624	10.5542	PF00071,PF08477	PTHR11708	KOG0087		K07976	AT3G12160.1	RABA4D	RAB GTPase homolog A4D					GO:0005525 GTP binding;GO:0005525 GTP binding;GO:0009860 pollen tube growth;GO:0045177 apical part of cell;GO:0070382 exocytic vesicle;GO:0048868 pollen tube development;GO:0019900 kinase binding;GO:0080092 regulation of pollen tube growth;GO:0090404 pollen tube tip
Pp1s197_12V6	4.88301	4.62104	1.95765	2.86653		978	675	116	246	29.5076	24.6078	3.88428	7.29309	PF01192	PTHR10773	KOG3405		K03014	AT2G04630.1	NRPB6B	RNA polymerase Rpb6				Purine metabolism;Pyrimidine metabolism;Metabolic pathways;RNA polymerase	GO:0003677 DNA binding;GO:0003677 DNA binding;GO:0003899 DNA-directed RNA polymerase activity;GO:0003899 DNA-directed RNA polymerase activity;GO:0006351 "transcription, DNA-dependent";GO:0006351 "transcription, DNA-dependent";GO:0005665 "DNA-directed RNA polymerase II, core complex"
Pp1s197_2V6	1.97169	4.21099	2.29934	1.66548		130	508	147	107	3.92228	18.5197	4.92232	3.1722	PF00378	PTHR11941				AT4G16800.1		ATP-dependent caseinolytic (Clp) protease/crotonase family protein				Valine, leucine and isoleucine degradation;Metabolic pathways	GO:0003824 catalytic activity;GO:0004300 enoyl-CoA hydratase activity;GO:0005739 mitochondrion;GO:0006631 fatty acid metabolic process;GO:0008152 metabolic process
Pp1s197_92V6	2.73723	2.70612	1.30912	4.46898		221	179	74	747	6.66787	6.52563	2.4779	22.1461	PF08477,PF00036,PF08356,PF08355	PTHR11708	KOG1707			AT5G27540.2	MIRO1	MIRO-related GTP-ase 1					GO:0005525 GTP binding;GO:0005525 GTP binding;GO:0009793 embryo development ending in seed dormancy;GO:0005739 mitochondrion;GO:0005739 mitochondrion;GO:0005739 mitochondrion;GO:0007005 mitochondrion organization;GO:0009790 embryo development;GO:0009860 pollen tube growth;GO:0005829 cytosol;GO:0005829 cytosol
Pp1s199_130V6	5.87117	4.86796	7.70746	4.37317		1940	801	6242	699	58.5324	29.2013	209.015	20.7231	PF00004		KOG0651			AT2G39730.2	RCA	rubisco activase					GO:0009507 chloroplast;GO:0030234 enzyme regulator activity;GO:0009941 chloroplast envelope;GO:0009941 chloroplast envelope;GO:0009941 chloroplast envelope;GO:0009941 chloroplast envelope;GO:0009941 chloroplast envelope;GO:0009941 chloroplast envelope;GO:0005634 nucleus;GO:0005634 nucleus;GO:0005634 nucleus;GO:0009535 chloroplast thylakoid membrane;GO:0009535 chloroplast thylakoid membrane;GO:000…
Pp1s2_226V6	4.278	6.6354	6.24432	5.01015		643	2727	2264	1087	19.4002	99.4156	75.8105	32.226	PF05562					AT1G29390.1	COR314-TM2	cold regulated 314 thylakoid membrane 2					GO:0003674 molecular_function;GO:0006950 response to stress;GO:0009535 chloroplast thylakoid membrane;GO:0009631 cold acclimation;GO:0009941 chloroplast envelope;GO:0031357 integral to chloroplast inner membrane;GO:0070417 cellular response to cold
Pp1s2_24V6	5.91727	5.17067	2.77915	4.56064		2003	988	205	796	60.4332	36.0186	6.86446	23.5988	PF00335		KOG3882			AT2G23810.1	TET8	tetraspanin8					GO:0003674 molecular_function;GO:0007568 aging;GO:0005886 plasma membrane;GO:0005886 plasma membrane;GO:0005886 plasma membrane;GO:0016020 membrane
Pp1s2_609V6	3.15878	5.37585	6.53638	4.64341		296	1139	2772	843	8.93072	41.5234	92.8209	24.9922	PF11820					AT5G63500.1		Protein of unknown function (DUF 3339)					GO:0003674 molecular_function;GO:0008150 biological_process;GO:0031225 anchored to membrane;GO:0031225 anchored to membrane
Pp1s200_69V6	4.52864	2.27758	5.00806	2.44758		765	133	961	184	23.0811	4.84865	32.1793	5.455	PF00466					AT5G13510.1		Ribosomal protein L10 family protein					GO:0003735 structural constituent of ribosome;GO:0005840 ribosome;GO:0006412 translation;GO:0042254 ribosome biogenesis;GO:0022626 cytosolic ribosome;GO:0022626 cytosolic ribosome;GO:0009570 chloroplast stroma;GO:0009507 chloroplast
Pp1s201_31V6	3.29805	3.52608	3.32367	0.13347		326	316	299	37	9.83586	11.5201	10.0121	1.09693	PF10262	PTHR15124
Pp1s206_122V6	5.52675	4.45352	0.907022	2.67221		1528	601	56	215	46.1018	21.9101	1.87517	6.37405	PF00170,PF07716,PF12498	PTHR13301:SF7				AT5G28770.2	BZO2H3	bZIP transcription factor family protein					GO:0003677 DNA binding;GO:0003700 sequence-specific DNA binding transcription factor activity;GO:0006355 "regulation of transcription, DNA-dependent";GO:0006355 "regulation of transcription, DNA-dependent";GO:0006355 "regulation of transcription, DNA-dependent";GO:0006355 "regulation of transcription, DNA-dependent";GO:0003700 sequence-specific DNA binding transcription factor activity;GO:0003700…
Pp1s206_83V6	2.65668	3.86255	0.743523	2.09394		209	399	50	144	6.30582	14.546	1.67426	4.26913	PF01012,PF00766	PTHR10909	KOG3954		K03522	AT1G50940.1	ETFALPHA	electron transfer flavoprotein alpha					GO:0005739 mitochondrion;GO:0005739 mitochondrion;GO:0005507 copper ion binding
Pp1s207_68V6	3.77269	3.283	1.98231	3.96841		453	267	118	528	13.6676	9.73376	3.95125	15.6535	PF00676	PTHR11516	KOG1182	1.2.4.4	K00166	AT1G21400.1		Thiamin diphosphate-binding fold (THDP-binding) superfamily protein				Valine, leucine and isoleucine degradation;Metabolic pathways;Biosynthesis of secondary metabolites	GO:0003863 3-methyl-2-oxobutanoate dehydrogenase (2-methylpropanoyl-transferring) activity;GO:0008152 metabolic process;GO:0008152 metabolic process;GO:0016624 "oxidoreductase activity, acting on the aldehyde or oxo group of donors, disulfide as acceptor"
Pp1s209_52V6	4.03944	3.82963	2.29934	5.58312		545	390	147	1617	16.4434	14.2179	4.92232	47.9388	PF01370	PTHR10366	KOG1429			AT3G62830.1	AUD1	NAD(P)-binding Rossmann-fold superfamily protein					GO:0003824 catalytic activity;GO:0009225 nucleotide-sugar metabolic process;GO:0008460 "dTDP-glucose 4,6-dehydratase activity";GO:0019305 dTDP-rhamnose biosynthetic process;GO:0016020 membrane;GO:0042732 D-xylose metabolic process;GO:0048040 UDP-glucuronate decarboxylase activity;GO:0000139 Golgi membrane;GO:0005886 plasma membrane;GO:0005886 plasma membrane;GO:0005829 cytosol;GO:0005829 cytosol
Pp1s21_136V6	2.52675	3.06151	2.75072	0.478605		191	229	201	47	5.76273	8.34843	6.73052	1.3934	PF00098	PTHR23002				AT4G36020.1	CSDP1	cold shock domain protein 1					GO:0003676 nucleic acid binding;GO:0003690 double-stranded DNA binding;GO:0003697 single-stranded DNA binding;GO:0003723 RNA binding;GO:0009409 response to cold;GO:0010501 RNA secondary structure unwinding;GO:0032508 DNA duplex unwinding
Pp1s21_182V6	3.63932	4.1765	1.66952	2.96294		413	496	95	263	12.4608	18.0822	3.18109	7.79709	PF00293	PTHR22769	KOG2839			AT3G10620.1	NUDX26	nudix hydrolase homolog 26					GO:0004081 bis(5'-nucleosyl)-tetraphosphatase (asymmetrical) activity;GO:0009507 chloroplast;GO:0034432 bis(5'-adenosyl)-pentaphosphatase activity
Pp1s21_270V6	6.3933	4.9123	8.12013	5.77577		2786	826	8309	1848	84.0574	30.1127	278.228	54.7871	PF00464	PTHR11680	KOG2467	2.1.2.1	K00600	AT4G37930.1	SHM1	serine transhydroxymethyltransferase 1				Glycine, serine and threonine metabolism;Cyanoamino acid metabolism;One carbon pool by folate;Metabolic pathways;Biosynthesis of secondary metabolites	GO:0004372 glycine hydroxymethyltransferase activity;GO:0006544 glycine metabolic process;GO:0006563 L-serine metabolic process;GO:0019464 glycine decarboxylation via glycine cleavage system;GO:0005759 mitochondrial matrix;GO:0005634 nucleus;GO:0005739 mitochondrion;GO:0009507 chloroplast;GO:0009626 plant-type hypersensitive response;GO:0022626 cytosolic ribosome;GO:0046686 response to cadmium io…
Pp1s21_318V6	3.53052	5.41829	4.28949	6.17727		383	1173	584	2441	11.5556	42.7629	19.5554	72.3677	PF00085	PTHR10438	KOG0907			AT3G51030.1	TRX1	thioredoxin H-type 1					GO:0045454 cell redox homeostasis;GO:0008047 enzyme activator activity;GO:0043085 positive regulation of catalytic activity;GO:0005829 cytosol;GO:0016671 "oxidoreductase activity, acting on a sulfur group of donors, disulfide as acceptor"
Pp1s211_21V6	3.06307	2.23353	1.32849	3.87821		277	129	75	496	8.35747	4.70283	2.51139	14.7048	PF00179	PTHR11621	KOG0427	6.3.2.19	K10688	AT1G75440.1	UBC16	ubiquitin-conjugating enzyme 16				Ubiquitin mediated proteolysis	GO:0004842 ubiquitin-protein ligase activity;GO:0019787 small conjugating protein ligase activity;GO:0006511 ubiquitin-dependent protein catabolic process
Pp1s211_32V6	2.08887	2.61462	1.28949	4.34608		141	168	73	686	4.25416	6.12461	2.44442	20.3377	PF08718	PTHR10219	KOG4189			AT2G34690.1	ACD11	Glycolipid transfer protein (GLTP) family protein					GO:0008219 cell death;GO:0009751 response to salicylic acid stimulus;GO:0009816 "defense response to bacterium, incompatible interaction";GO:0010175 sphingosine transmembrane transporter activity;GO:0005515 protein binding;GO:0005515 protein binding
Pp1s212_34V6	2.03679	2.79973	5.33329	4.33128		136	191	1204	679	4.10331	6.9631	40.3162	20.1301						AT4G01150.1							GO:0003674 molecular_function;GO:0008150 biological_process;GO:0009941 chloroplast envelope;GO:0009535 chloroplast thylakoid membrane;GO:0009507 chloroplast;GO:0009535 chloroplast thylakoid membrane;GO:0009535 chloroplast thylakoid membrane;GO:0010287 plastoglobule;GO:0010287 plastoglobule;GO:0009507 chloroplast;GO:0009507 chloroplast;GO:0009579 thylakoid
Pp1s213_80V6	7.59768	6.70158	10.0381	8.81067		6420	2855	31399	15146	193.7	104.082	1051.4	449.029	PF00504	PTHR21649				AT2G05070.1	LHCB2.2	photosystem II light harvesting complex gene 2.2				Photosynthesis - antenna proteins;Metabolic pathways	GO:0009765 "photosynthesis, light harvesting";GO:0015979 photosynthesis;GO:0016168 chlorophyll binding;GO:0030076 light-harvesting complex;GO:0009941 chloroplast envelope;GO:0009535 chloroplast thylakoid membrane;GO:0009507 chloroplast;GO:0009535 chloroplast thylakoid membrane;GO:0009535 chloroplast thylakoid membrane;GO:0010287 plastoglobule;GO:0005774 vacuolar membrane;GO:0009507 chloroplast;GO…
Pp1s218_133V6	3.31127	5.06779	3.74713	6.4685		329	920	401	2987	9.92638	33.5396	13.4276	88.5548	PF07728,PF00004	PTHR23073	KOG0652		K03065	AT3G05530.1	RPT5A	regulatory particle triple-A ATPase 5A				Proteasome	GO:0016887 ATPase activity;GO:0006511 ubiquitin-dependent protein catabolic process;GO:0016887 ATPase activity;GO:0005634 nucleus;GO:0005516 calmodulin binding;GO:0005634 nucleus;GO:0005737 cytoplasm;GO:0009553 embryo sac development;GO:0009555 pollen development;GO:0010498 proteasomal protein catabolic process;GO:0000502 proteasome complex;GO:0005829 cytosol;GO:0008540 "proteasome regulatory par…
Pp1s219_106V6	5.00867	4.85893	3.98231	6.24707		1067	796	472	2562	32.1928	29.019	15.805	75.9549	PF00179	PTHR11621	KOG0419			AT1G14400.2	UBC1	ubiquitin carrier protein 1				Ubiquitin mediated proteolysis	GO:0004842 ubiquitin-protein ligase activity;GO:0006511 ubiquitin-dependent protein catabolic process;GO:0004842 ubiquitin-protein ligase activity;GO:0006511 ubiquitin-dependent protein catabolic process;GO:0009910 negative regulation of flower development;GO:0009965 leaf morphogenesis;GO:0010228 vegetative to reproductive phase transition of meristem;GO:0033523 histone H2B ubiquitination
Pp1s219_94V6	2.64281	2.91579	5.23281	3.55337		207	207	1123	396	6.24547	7.5464	37.6039	11.7401	PF00490	PTHR11458	KOG2794	4.2.1.24	K01698	AT1G69740.2	HEMB1	Aldolase superfamily protein				Porphyrin and chlorophyll metabolism;Metabolic pathways;Biosynthesis of secondary metabolites	GO:0003824 catalytic activity;GO:0003824 catalytic activity;GO:0004655 porphobilinogen synthase activity;GO:0004655 porphobilinogen synthase activity;GO:0004655 porphobilinogen synthase activity;GO:0046872 metal ion binding;GO:0046872 metal ion binding;GO:0009507 chloroplast;GO:0009570 chloroplast stroma;GO:0009507 chloroplast;GO:0009507 chloroplast;GO:0009570 chloroplast stroma;GO:0006779 porphy…
Pp1s22_18V6	6.13482	5.08184	3.96695	6.96156		2329	929	467	4204	70.2691	33.8677	15.6376	124.635	PF09598,PF04774	PTHR12299	KOG2945		K13199	AT4G17520.1		Hyaluronan / mRNA binding family					GO:0003723 RNA binding;GO:0008150 biological_process;GO:0005777 peroxisome;GO:0005777 peroxisome;GO:0005634 nucleus;GO:0005829 cytosol
Pp1s22_263V6	3.37139	2.7692	4.27958	2.84883		343	187	580	243	10.3488	6.81728	19.4214	7.20415	PF00079	PTHR11461	KOG2392			AT1G47710.1		Serine protease inhibitor (SERPIN) family protein					GO:0004867 serine-type endopeptidase inhibitor activity;GO:0004867 serine-type endopeptidase inhibitor activity;GO:0008150 biological_process;GO:0010951 negative regulation of endopeptidase activity;GO:0030162 regulation of proteolysis;GO:0004869 cysteine-type endopeptidase inhibitor activity;GO:0048046 apoplast
Pp1s22_384V6	4.95495	6.64647	1.30912	2.97386		1028	2748	74	265	31.0162	100.181	2.4779	7.85638						AT3G13227.1		serine-rich protein-related					GO:0003674 molecular_function;GO:0005575 cellular_component;GO:0008150 biological_process
Pp1s22_79V6	3.16364	1.1765	2.97618	2.46318		297	62	235	186	8.9609	2.26027	7.86902	5.51429	PF01474	PTHR21337				AT1G22410.1		Class-II DAHP synthetase family protein				Phenylalanine, tyrosine and tryptophan biosynthesis;Metabolic pathways;Biosynthesis of secondary metabolites	GO:0003849 3-deoxy-7-phosphoheptulonate synthase activity;GO:0016020 membrane;GO:0009073 aromatic amino acid family biosynthetic process
Pp1s220_84V6	3.37978	2.42197	0.654256	2.43972		345	147	47	183	10.4091	5.35904	1.5738	5.42535	PF00582					AT5G66090.1							GO:0003674 molecular_function;GO:0009570 chloroplast stroma;GO:0009507 chloroplast
Pp1s226_102V6	2.99372	3.82221	0.684629	3.1908		264	388	48	308	7.96524	14.1449	1.60729	9.13119						AT5G61490.1		Uncharacterised conserved protein (UCP012943)					GO:0003674 molecular_function;GO:0005575 cellular_component;GO:0008150 biological_process
Pp1s226_108V6	3.43314	4.58205	0.654256	3.19548		358	657	47	309	10.8013	23.9516	1.5738	9.16084	PF00069,PF07714	PTHR23257	KOG0192			AT1G64300.1		Protein kinase family protein					GO:0006468 protein phosphorylation;GO:0006468 protein phosphorylation;GO:0016301 kinase activity;GO:0004712 protein serine/threonine/tyrosine kinase activity
Pp1s227_62V6	3.41285	0.950222	2.08835	2.06357		353	53	127	141	10.6505	1.93217	4.25262	4.18019	PF03798					AT5G14280.1		DNA-binding storekeeper protein-related					GO:0008150 biological_process;GO:0016021 integral to membrane;GO:0006355 "regulation of transcription, DNA-dependent"
Pp1s228_25V6	4.21377	2.5077	4.12203	3.03776		615	156	520	277	18.5554	5.68714	17.4123	8.21214	PF00195,PF02797			2.3.1.74	K00660	AT5G13930.1	TT4	Chalcone and stilbene synthase family protein				Flavonoid biosynthesis;Metabolic pathways;Biosynthesis of secondary metabolites;Circadian rhythm - plant	GO:0009926 auxin polar transport;GO:0005783 endoplasmic reticulum;GO:0009705 plant-type vacuole membrane;GO:0010224 response to UV-B;GO:0005634 nucleus;GO:0005783 endoplasmic reticulum;GO:0031540 regulation of anthocyanin biosynthetic process;GO:0009611 response to wounding;GO:0009753 response to jasmonic acid stimulus;GO:0009629 response to gravity;GO:0009733 response to auxin stimulus;GO:000981…
Pp1s23_50V6	3.27575	4.92274	0.491984	3.9127		321	832	42	508	9.68501	30.3314	1.40638	15.0605	PF01326,PF00391,PF02896	PTHR22931		2.7.9.1	K01006	AT4G15530.2	PPDK	pyruvate orthophosphate dikinase				Pyruvate metabolism;Carbon fixation in photosynthetic organisms;Metabolic pathways	GO:0016301 kinase activity;GO:0016310 phosphorylation;GO:0009507 chloroplast;GO:0009507 chloroplast;GO:0009570 chloroplast stroma;GO:0005829 cytosol;GO:0009507 chloroplast;GO:0050242 "pyruvate, phosphate dikinase activity";GO:0009507 chloroplast;GO:0009507 chloroplast;GO:0009507 chloroplast;GO:0009507 chloroplast;GO:0009507 chloroplast;GO:0009507 chloroplast;GO:0005634 nucleus;GO:0005829 cytosol;…
Pp1s23_51V6	4.25994	2.32033	3.02448	0.538726		635	137	243	49	19.1588	4.99448	8.1369	1.45269	PF03018	PTHR21495				AT1G22900.1		Disease resistance-responsive (dirigent-like protein) family protein					GO:0003674 molecular_function;GO:0006952 defense response;GO:0012505 endomembrane system
Pp1s23_96V6	3.11925	-0.0772588	2.95765	4.96841		288	26	232	1056	8.68935	0.947857	7.76856	31.3069	PF00504	PTHR21649				AT2G05070.1	LHCB2.2	photosystem II light harvesting complex gene 2.2				Photosynthesis - antenna proteins;Metabolic pathways	GO:0009765 "photosynthesis, light harvesting";GO:0015979 photosynthesis;GO:0016168 chlorophyll binding;GO:0030076 light-harvesting complex;GO:0009941 chloroplast envelope;GO:0009535 chloroplast thylakoid membrane;GO:0009507 chloroplast;GO:0009535 chloroplast thylakoid membrane;GO:0009535 chloroplast thylakoid membrane;GO:0010287 plastoglobule;GO:0005774 vacuolar membrane;GO:0009507 chloroplast;GO…
Pp1s231_41V6	3.63932	2.36185	1.68463	3.63138		413	141	96	418	12.4608	5.1403	3.21458	12.3923	PF10604				K14496	AT5G53160.2	RCAR3	regulatory components of ABA receptor 3				Plant hormone signal transduction	GO:0003674 molecular_function;GO:0004872 receptor activity;GO:0009738 abscisic acid mediated signaling pathway;GO:0004872 receptor activity;GO:0005515 protein binding;GO:0009738 abscisic acid mediated signaling pathway;GO:0004872 receptor activity;GO:0005515 protein binding;GO:0005515 protein binding;GO:0009737 response to abscisic acid stimulus;GO:0009738 abscisic acid mediated signaling pathway…
Pp1s232_44V6	5.1539	3.95362	1.49198	4.68723		1180	425	84	869	35.6022	15.4938	2.81276	25.763	PF00069,PF00036	PTHR22982	KOG0032	2.7.11.1	K13412	AT5G12480.1	CPK7	calmodulin-domain protein kinase 7				Plant-pathogen interaction	GO:0004672 protein kinase activity;GO:0004672 protein kinase activity;GO:0004674 protein serine/threonine kinase activity;GO:0004674 protein serine/threonine kinase activity;GO:0004683 calmodulin-dependent protein kinase activity;GO:0005509 calcium ion binding;GO:0005509 calcium ion binding;GO:0005524 ATP binding;GO:0005524 ATP binding;GO:0006468 protein phosphorylation;GO:0006468 protein phospho…
Pp1s233_13V6	2.17814	2.81476	0.98231	3.4554		150	193	59	370	4.5257	7.03601	1.97563	10.9693	PF00642	PTHR12681	KOG1763			AT2G20280.1		Zinc finger C-x8-C-x5-C-x3-H type family protein					GO:0003676 nucleic acid binding;GO:0003676 nucleic acid binding;GO:0005575 cellular_component;GO:0008150 biological_process;GO:0008270 zinc ion binding
Pp1s233_3V6	2.78853	2.35158	2.26959	4.55883		229	140	144	795	6.90924	5.10385	4.82187	23.5691
Pp1s233_4V6	3.48071	5.16482	1.93256	2.68557		370	984	114	217	11.1634	35.8727	3.81731	6.43334	PF01373					AT3G23920.1	BAM1	beta-amylase 1					GO:0016161 beta-amylase activity;GO:0005983 starch catabolic process;GO:0016161 beta-amylase activity;GO:0005634 nucleus;GO:0005829 cytosol;GO:0009414 response to water deprivation;GO:0005829 cytosol
[truncated: 831 more rows]

## Sheet: cluster-6
#Gene	0h (TPM)	24h (TPM)	48h (TPM)	72h (TPM)		0h	24h	48h	72h	0h (TPM)	24h (TPM)	48h (TPM)	72h (TPM)	PFAM	Panther	KOG	KEGG ec	KEGG Orthology	best arabidopsis TAIR10 hit name	best arabidopsis TAIR10 hit symbol	best arabidopsis TAIR10 hit defline	best rice hit name	best rice hit symbol	best rice hit defline	Pathway	Go_terms
[truncated: 1,819 more rows]
